# Supplementary material for: Learning probabilistic protein–DNA recognition codes from DNA-binding specificities using structural mappings
Source: HighWire-hosted journal article supplement (doi:10.1101/gr.276606.122), 2022-09-01
Supplement: SUPPLEMENTAL_Matl.zip [file 1-s2.0-S009286740800682X-mmc2.xls]

## Sheet: Sheet1
HD Name	AbdA	AbdB	Achi	Al	Antp	Ap	Ara	Awh	Bap	Bcd	BH1	BH2	Bsh	Btn	C15	Cad	Caup	Ct	Dfd	Dll	Dr	E5	Ems	En	Eve	Exd	Exex	Ftz	Gsc	H2.0	Hbn	Hgtx	Hmx	Hth	Ind	Inv	Lab	Lag1	Lbe	Lbl	Lim1	Lim3	Mirr	NK7.1	Oc	Oct	Odsh	onecut	Optix
Selection conditions (UV2-10mM unless noted)																		UV5 - 5mM												UV5								UV5 - 5mM										UV5 - 5mM
HD aa seq.	RRRGRQTYTRFQTLELEKEFHFNHYLTRRRRIEIAHALCLTERQIKIWFQNRRMKLKKELRAVKEINEQAR	VRKKRKPYSKFQTLELEKEFLFNAYVSKQKRWELARNLQLTERQVKIWFQNRRMKNKKNSQRQANQQNNNN	LRKRRGNLPKTSVKILKRWLYEHRYNAYPSDAEKFTLSQEANLTVLQVCNWFINARRRILPEMIRREGNDPLHFT	QRRYRTTFTSFQLEELEKAFSRTHYPDVFTREELAMKIGLTEARIQVWFQNRRAKWRKQEKVGPQSHPYN	RKRGRQTYTRYQTLELEKEFHFNRYLTRRRRIEIAHALCLTERQIKIWFQNRRMKWKKENKTKGEPGSGGEGD	TKRMRTSFKHHQLRTMKSYFAINHNPDAKDLKQLSQKTGLPKRVLQVWFQNARAKWRRMMMKQDGSGLLEKGE	LAARRKNATRESTATLKAWLNEHKKNPYPTKGEKIMLAIITKMTLTQVSTWFANARRRLKKENKMTWEPKNRTDDD	KTKRVRTTFTEEQLQVLQANFQIDSNPDGQDLERIASVTGLSKRVTQVWFQNSRARQKKHIHAGKNKIREPEGS	KKRSRAAFSHAQVFELERRFAQQRYLSGPERSEMAKSLRLTETQVKIWFQNRRYKTKRKQIQQHEAALLGASK	PRRTRTTFTSSQIAELEQHFLQGRYLTAPRLADLSAKLALGTAQVKIWFKNRRRRHKIQSDQHKDQSYEG	QRKARTAFTDHQLQTLEKSFERQKYLSVQERQELAHKLDLSDCQVKTWYQNRRTKWKRQTAVGLELLAEAGN	KQRKARTAFTDHQLQTLEKSFERQKYLSVQDRMELANKLELSDCQVKTWYQNRRTKWKRQTAVGLELLAEAGN	RRRKARTVFSDPQLSGLEKRFEGQRYLSTPERVELATALGLSETQVKTWFQNRRMKHKKQLRRRDNANEP	NRKERTAFSKTQLKQLEAEFCYSNYLTRLRRYEIAVALELTERQVKVWFQNRRMKCKRIKLEEQQGSSAKT	KRKKPRTSFTRIQVAELEKRFHKQKYLASAERAALARGLKMTDAQVKTWFQNRRTKWRRQTAEEREAERQ	KDKYRVVYTDFQRLELEKEYCTSRYITIRRKSELAQTLSLSERQVKIWFQNRRAKERKQNKKGSDPNVMGVG	LAARRKNATRESTATLKAWLSEHKKNPYPTKGEKIMLAIITKMTLTQVSTWFANARRRLKKENKMTWEPKNKTEDD	SKKQRVLFSEEQKEALRLAFALDPYPNVGTIEFLANELGLATRTITNWFHNHRMRLKQQVPHGPAGQDNPIPS	PKRQRTAYTRHQILELEKEFHYNRYLTRRRRIEIAHTLVLSERQIKIWFQNRRMKWKKDNKLPNTKNVRKKT	KMRKPRTIYSSLQLQQLNRRFQRTQYLALPERAELAASLGLTQTQVKIWFQNRRSKYKKMMKAAQGPGTNSG	NRKPRTPFTTQQLLSLEKKFREKQYLSIAERAEFSSSLRLTETQVKIWFQNRRAKAKRLQEAEIEKIKMAALG	PKRVRTAFSPTQLLKLEHAFEGNHYVVGAERKQLAQGLSLTETQVKVWFQNRRTKHKRMQQEGGDGSDTKSNK	PKRIRTAFSPSQLLKLEHAFESNQYVVGAERKALAQNLNLSETQVKVWFQNRRTKHKRMQQEDEKGGEGGSQR	EKRPRTAFSSEQLARLKREFNENRYLTERRRQQLSSELGLNEAQIKIWFQNKRAKIKKSTGSKNPLALQLMAQ	VRRYRTAFTRDQLGRLEKEFYKENYVSRPRRCELAAQLNLPESTIKVWFQNRRMKDKRQRIAVAWPYAAVYSD	ARRKRRNFSKQASEILNEYFYSHLSNPYPSEEAKEELARKCGITVSQVSNWFGNKRIRYKKNIGKAQEEANLYAAKKAAGAS	TRRPRTAFTSQQLLELEKQFKQNKYLSRPKRFEVASGLMLSETQVKIWFQNRRMKWKRSKKAQQEAKERAKAN	SKRTRQTYTRYQTLELEKEFHFNRYITRRRRIDIANALSLSERQIKIWFQNRRMKSKKDRTLDSSPEHCGAG	KRRHRTIFTEEQLEQLEATFDKTHYPDVVLREQLALKVDLKEERVEVWFKNRRAKWRKQKREEQERLRKLQEE	RSWSRAVFSNLQRKGLEIQFQQQKYITKPDRRKLAARLNLTDAQVKVWFQNRRMKWRHTRENLKSGQEKQPSA	KVRRSRTTFTTFQLHQLERAFEKTQYPDVFTREDLAMRLDLSEARVQVWFQNRRAKWRKREKFMNQDKAG	KKHTRPTFSGQQIFALEKTFEQTKYLAGPERAKLAYALGMSESQVKVWFQNRRTKWRKRHAAEMATAKRKQDD	KKKTRTVFSRAQVFQLESTFDLKRYLSSSERAGLAASLRLTETQVKIWFQNRRNKWKRQLAAELEAANMANMA	NQKKRGIFPKVATNILRAWLFQHLTHPYPSEDQKKQLAQDTGLTILQVNNWFINARRRIVQPMIDQ	SKRIRTAFTSTQLLELEREFSHNAYLSRLRRIEIANRLRLSEKQVKIWFQNRRVKQKKGGSESPTFNLSTNSN	EDKRPRTAFSGTQLARLKHEFNENRYLTEKRRQQLSGELGLNEAQIKIWFQNKRAKLKKSSGTKNPLALQLMAQ	NNSGRTNFTNKQLTELEKEFHFNRYLTRARRIEIANTLQLNETQVKIWFQNRRMKQKKRVKEGLIPADILTQH	IRSSRPKKAANVPILEKTYAKSTRLDKKKLVPLSKQTDMSEREIERWWRLRRAQDKPSTLVKFCENTWRC	KRKSRTAFTNHQIFELEKRFLYQKYLSPADRDEIAASLGLSNAQVITWFQNRRAKQKRDIEELKKDFDSVK	KRKSRTAFTNQQIFELEKRFLYQKYLSPADRDEIAGGLGLSNAQVITWFQNRRAKLKRDMEELKKDVQCEKMS	RRGPRTTIKAKQLEVLKTAFNQTPKPTRHIREQLAKETGLPMRVIQVWFQNKRSKERRMKQITSMGRPPFFGG	PNKRPRTTITAKQLETLKTAYNNSPKPARHVREQLSQDTGLDMRVVQVWFQNRRAKEKRLKKDAGRTRWSQY	NGARRKNATRETTSTLKAWLNEHKKNPYPTKGEKIMLAIITKMTLTQVSTWFANARRRLKKENKMTWEPRNRVDDD	RKKKARTTFTGRQIFELEKMFENKKYLSASERTEMAKLLMVTETQVKIWFQNRRTKWKKQDNVTNNEAAEHK	QRRERTTFTRAQLDVLEALFGKTRYPDIFMREEVALKINLPESRVQVWFKNRRAKCRQQLQQQQQSNSLSSSK	RRKKRTSIETNIRVALEKSFLENQKPTSEEITMIADQLNMEKEVIRVWFCNRRQKEKRINPPS	KKRRGRTNFNSWQLRELERVFQGSHYPDIFMREALATKLDLMEGRIAVWFQNRRAKWRKQEHTKKGPGRPAHNA	PKKPRLVFTDLQRRTLQAIFKETKRPSKEMQVTIARQLGLEPTTVGNFFMNARRRSMDKWRDDDSKSTMHVAH	GEQKTHCFKERTRSLLREWYLQDPYPNPTKKRELAKATGLNPTQVGNWFKNRRQRDRAAAAKNRIQHSQNSSG
Selected Sequences	>AbdAG02	>abdb2	>AchiG1	>AlE2	>AntpA02	>ApA2	>AraG1	>AwhC1	>BapA2	>bcd1	>B1HG1	>BH2E1	>BshE1	>BtnE1	>C15A1	>CadE1	>CaupA2	>5CtE1	>dfd1	>DllC1	>DrA2	>E5C1	>emsA1	>eng1	>Eve-G1	>ExdE1	>ExexE1	>FtzG1	>GscA1	>H20C1	>HbnA1	>HgtxC1	>HMXA2	>hthC2	>IndC1	>InvC1	>LabE1	>5Lag1G1	>IbeG2	>LblC1	>LimC1	>Lim3C1	>MirrE1	>NK7E1	>OcA1	>oct1	>OdshC1	>5onectG1	>11617C2
	GGTAATTAAA	GGGTTTATAG	TGTCAAG	GCTAATTAAT	GCCTTAATTA	ATCATTAACC	GGGTATTACA	GTAATCAAAT	GCTTAAGTGG	TGTTAATCCG	GCAAACCCCT	GCCGTTTATC	ACCCATTAGG	TGCCATTAAA	AATTTAAAGA	CCACAAATTA	ATTATTAACA	CTTGCTAAAC	CTTCATTAAG	AGACAATTAA	ACCTCAATTA	TTCAATTAGG	TTAATTATA	CTAATTAGCG	TCCGACATAA	TGTTTGACAT	CTTAATTAGA	ATCATAATTG	CCGATTACGA	TTTTTATATA	TTAATTATT	CCCTATTAAT	ATGTTAATTG	CTTGTGACAG	GGATTAATTA	ATAATTAACC	TCATTAACGA	GGACCTGAAG	GATGATTATG	GATAATTATC	TAGATTACGT	CCCCTGATTA	ACTTGTAACA	CATATAATGA	CCACTAATC	GCGATAATGA	GTTGTAATTA	GAGCTGATTA	GAACCTACTT
	>AbdAG03	>abdb3	>AchiG2	>AlE5	>AntpA03	>ApA3	>AraG2	>AwhC2	>BapA3	>bcd2	>B1HG2	>BH2E2	>BshE2	>BtnE2	>C15A2	>CadE2	>CaupA3	>5CtE2	>dfd2	>DllC2	>DrA3	>E5C2	>emsA2	>eng2	>Eve-G2	>ExdE2	>ExexE2	>FtzG2	>GscA2	>H20C2	>HbnA4	>HgtxC2	>HMXA3	>hthC3	>IndC2	>InvC2	>LabE2	>5Lag1G4	>IbeG3	>LblC2	>LimC2	>Lim3C2	>MirrE2	>NK7E2	>OcA2	>oct2	>OdshC2	>5onectG2	>11617C3
	TCGTTAATGA	GTTTTATTGT	AATGTGACA	TTTTAATTAA	AATTTAATTA	AGACTAATTG	TGTACTTACA	CCAATCAGCC	TCTTAAGTGG	ATGGATTAGA	TCGTTTCCCT	TGCAATTAAA	GTCGATTAAA	TCAGTAATGA	GCCAATTAAC	CTAATCAACA	GTCTTTTACA	TCGTCTGAAC	GGTCATTAAT	GTCCATTATCA	AAAGCAATTA	TTAATTAAAT	CCATTTATGT	TATTTAATTA	TTACTTAATT	CATGATGATT	ACCAATTAAG	CAGCCGCCC	CAAGTAATCC	CTCTTAATGA	AGTAATTACC	AGTAATTGAA	AAGATAATTG	ATATGTCAAA	CGCTAATGA	ACTAATTAAT	GCCTTAATTA	GTAGAAGAGG	CATCTAAGTA	GGTAATTATA	CAACAGTGGG	ATTTATTAAG	TTCAGTAACA	GAATTAAGTG	AGCTTAAGCC	GGTTTAATGA	GAAATTAAA	CGAAATCAAG	GCGCATGAGA
	>AbdAG04	>abdb4	>AchiG3	>AlE6	>AntpA04	>ApA4	>AraG4	>AwhC3	>BapA4	>bcd3	>B1HG3	>BH2E4	>BshE3	>BtnE3	>C15A3	>CadE3	>CaupA4	>5CtE3	>dfd3	>DllC3	>DrA4	>E5C3	>emsA3	>eng3	>Eve-G3	>ExdE3	>ExexE3	>FtzG3	>GscA3	>H20C3	>HbnA5	>HgtxC3	>HMXA4	>hthC4	>IndC3	>InvC3	>LabE3	>5Lag1G5	>IbeG4	>LblC3	>LimC3	>Lim3C3	>MirrE3	>NK7E3	>OcA3	>oct3	>OdshC3	>5onectG3	>11617C4
	TTTTTAATTA	TTTTTTATGG	AGCTGTCATG	TGCTAATTAA	AGCTTAATGA	AGGTTAATTA	GCAGTTTACA	GTTCATTAAA	TAACGCTGCA	CGTTAATCTC	TCACGCCGAG	GACTATTAAG	CGTCATTAAG	CACTTGATTA	CCCCATTAAC	GTAATAACTT	AGCAAAAACA	AAGGTTAAAC	TATCATTAAA	CGCTATTACA	TGGCCAATTA	CTAATTTACA	CATTTTATGA	CTCATTAGTG	TCGATTATTA	TCTTTGACAT	GGGTAATTAA	TCCCATTAAC	AAGATTAGTC	ACATTATTGA	TTCAATTACA	AGCTAATTA	ACGCTAATTG	ACGTCAAGG	TACCTAATGA	ATAATTAGCA	TGGCTAATTA	TCCCCCATCC	AGGTTAACCA	AGGATAATTG	AAGCAAGCCG	CGCTTAATCA	AGTAAATACA	GAATTAAGTG	CGATAATCCC	GTTTTAATAA	ATAATTAGCA	GCAATCAAGG	TGAAGTGATA
	>AbdAG05	>abdb5	>AchiG4	>AlE7	>AntpA05	>ApA5	>AraG5	>AwhC4	>BapA5	>bcd4	>B1HG4	>BH2E5	>BshE4	>BtnE4	>C15A4	>CadE4	>CaupA5	>5CtE4	>dfd4	>DllC4	>DrA5	>E5C4	>emsA4	>eng4	>Eve-G4	>ExdE4	>ExexE4	>FtzG4	>GscA4	>H20C4	>HbnA6	>HgtxC4	>HMXA5	>hthC5	>IndC4	>InvC5	>LabE4	>5Lag1G6	>IbeG5	>LblC4	>LimC4	>Lim3C4	>MirrE4	>NK7E4	>OcA4	>oct4	>OdshC4	>5onectG4	>11617C5
	CTACCATTTT	TGATTAATGG	TTATCTGACA	GCATAATTAA	TTGTTAATGA	TAAATAATGA	CGTAATTACA	CTGATTACGC	ATCAGTCCTT	GGTTTAATCC	GCCTAAGAGA	GCCATTTAGT	ACCAATTACA	GTACATTAAT	GTCGTTTAAG	GAATTAATAG	TGGTTGTACA	TACGTTAATC	GGTCATTAAT	AGAAATTAAC	TAACTAATTA	CCATTAAGC	GCCATGGACC	AGGGTAATTA	CTTCTAATCA	CTTCATAC	AGAGTAATTA	CTCTTAATTA	TAGGATTATT	GGTTAATGAT	GTCAATTATG	GCCAATTATC	AGCCATTTAA	CCTGTCACAG	CACTTAATAG	CCACTAATTA	GATAATTAAT	CCACCAACTT	TCCTAATCAC	CCACTAATCA	AGCAGAATCG	ATAATTATTC	ACAGCAAACA	GGTATTTAAA	GGGGCTTAAA	CACATAATTT	TACTAATTAA	TTAATCAATA	CAACGTATT
	>AbdAG06	>abdb6	>AchiG5	>AlE8	>AntpA06	>ApA6	>AraG6	>AwhC5	>BapA6	>bcd5	>B1HG5	>BH2E6	>BshE6	>BtnE5	>C15A5	>CadE5	>CaupA6	>5CtE5	>dfd5	>DllC5	>DrA6	>E5C5	>emsA5	>eng5	>Eve-G5	>ExdE5	>ExexE5	>FtzG5	>GscA5	>H20C5	>HbnA7	>HgtxC5	>HMXA6	>hthC6	>IndC5	>InvC6	>LabE5	>5Lag1G7	>IbeG6	>LblC5	>LimC5	>Lim3C5	>MirrE5	>NK7E6	>OcA5	>oct5	>OdshC5	>5onectG5	>11617C6
	TTAATTAC	CGCTTTATGT	AGCATGACAG	GACTAATTAA	GGTAATTAAA	CTAATTAGCG	TCTGTTGAGT	GATTTGATTA	AGTTCTTAAG	TCTATAATCC	GGTAAAGCAT	ACCTATTAAA	TGCAATTAAT	CCCCATTAAG	GCTCGTTAAG	GCTTAAATGA	AACTATTACA	CACATTGAAC	GTCATTAACA	TATAATTTTA	TCTCCAATTA	ATAAATTAAC	TTCACTAATA	GCAATTATCA	TAGTAAATTA	CCTTTTGACA	CTTAATTATC	ATGCTCCCGC	AAGATTAGTA	TAGATATTAC	GATTAATTAA	TTTGTAATTA	ATATTAATTG	CTGTGACGT	TAATTAGAG	CTTCACTGAA	CATACCCAGA	CTACCAAGAA	CGTTAAATGA	GCTAATTATT	TTTTGTGATA	ATAATCATTA	TGCTATAACA	AAAATAATTA	GAGGATTATT	CTATAATTAG	TAACTAATTG	TACCAACAA	CAATGTGATA
	>AbdAG07	>abdb7	>AchiG6	>AlE9	>AntpA07	>ApA7	>AraG7	>AwhC6	>BapA7	>bcd6	>B1HG6	>BH2E7	>BshE7	>BtnE6	>C15A6	>CadE6	>CaupA7	>5CtE6	>dfd6	>DllC6	>DrA7	>E5C6	>emsA6	>eng7	>Eve-G6	>ExdE6	>ExexE6	>FtzG6	>GscA6	>H20C7	>HbnA8	>HgtxC6	>HMXA7	>hthC8	>IndC6	>InvC7	>LabE6	>5Lag1G8	>IbeG7	>LblC6	>LimC7	>Lim3C7	>MirrE6	>NK7E7	>OcA6	>oct6	>OdshC7	>5onectG6	>11617C7
	TTCTTTATTA	GGTTTACAAC	TGTTTGACAT	GATTAATTAA	GGTTTAATGA	GTGCTAATTG	CAGGAAAACA	TCAGCTAATT	ATCTTATTAC	TCTTAATCCC	CGCTAAAGTG	AGCCATTAAG	CTCTTAACGA	GCTGTAATTA	GTTTAACA	ATGATTTATTT	TTCATTAACA	TAGATTAAAC	CCTAATTAAG	ACAAATTAGG	TCACCAATTA	TTGTTAATAA	GGTCATTACT	GTGCTAATTA	CTTCTAACGA	CCATTTGACA	ACAGTAATTA	TTACTAATGA	TCAGATTATC	CCTTTATGGG	CTCTAATTGA	TCATTAAAAT	CCCTTAATTG	TGTCATC	GGTAATTAGA	GGTAATTATA	AATTTAATTA	AGGTCAGATA	GGTAATTACC	GTGCTAATTG	CCACCAGATT	AAACAAATTA	GGTAATAACA	GAGTAAATGA	TATATAATCC	GAGATAATTT	AGCTAATTA	GGCCAAGTCA	ACCAGTGATA
	>AbdAG08	>abdb8	>AchiG7	>AlE10	>AntpA08	>ApA8	>AraG8	>AwhC7	>BapA9	>bcd7	>B1HG7	>BH2E8	>BshE8	>BtnE7	>C15A7	>CadE8	>CaupA8	>5CtE7	>dfd7	>DllC7	>DrA8	>E5C7	>emsA7	>eng8	>Eve-G7	>ExdE7	>ExexE7	>FtzG7	>GscA7	>H20C8	>HbnA9	>HgtxC7	>HMXA8	>hthC9	>IndC7	>InvC8	>LabE7	>5Lag1G9	>IbeG8	>LblC7	>LimC8	>Lim3C8	>MirrE7	>NK7E8	>OcA7	>oct7	>OdshC8	>5onectG7	>11617C8
	GGACCCACAT	CGTTTAATGT	AAGGCAGAGA	TTCTAATTAA	GGC TTAATGA	GCTAATTAAT	TTGTATTACA	CTACTTAATT	ACTTATCTGA	GCTTAATCCG	ATCTTATTAC	GCTAATTGA	GATCATTAAG	GGTCATTACC	TGTTTAACGA	CTTATAAAAT	GCAGTTAACA	GCTCTTGAAC	GATAATTAAT	TGCCATTAAA	AGAGCAATTA	ACCGTAATTA	GTCCATTAAT	TCAATTAACC	CATCATTATA	ACTTTGATGA	ACGTTAATTA	TTATAAATGA	TAGGATTACT	CGTTGATTAA	CCTTAATTAA	CATGTAATTA	GTGTTAATTG	GACTGTCAGC	ACGTTAATGA	TCTAATTAAA	GCTAATTAAT	CCACTAATTC	GCTATAAGTA	GTTAATTAAA	CCCAGTAAGG	TTTCATCAGA	ACTCGTGACA	AAACTAATTG	TTTGCTAATC	GATATAATAA	CCTAATTACA	CGGTTTGCAA	GATTGCGATA
	>AbdAG09	>abdb10	>AchiG8	>AlE11	>AntpA10	>ApA9	>AraG9	>AwhC8	>BapA10	>bcd8	>B1HG8	>BH2E9	>BshE9	>BtnE8	>C15A8	>CadE9	>CaupA9	>5CtE8	>dfd8	>DllC8	>DrA9	>E5C8	>emsA8	>eng9	>Eve-G8	>ExdE8	>ExexE8	>FtzG8	>GscA8	>H20C9	>HbnA10	>HgtxC8	>HMXA10	>hthC10	>IndC8	>InvC9	>LabE8	>5Lag1G10	>IbeG9	>LblC8	>LimC9	>Lim3C10	>MirrE8	>NK7E10	>OcA8	>oct8	>OdshC9	>5onectG8	>11617C9
	TACCAAACCC	TGATTTATGT	GCCTGTCATA	TATAATTAA	CTACTAATTA	CCAATTATGA	GTCCAGATTG	CTAATTACTC	CATTAATAAC	GGGTTAATCC	GCTAATTGA	ACCTTTTAAG	TTTTTAATTA	GGTCGTTAAG	ACGTTAACGA	ACAGTAATTA	GGAAAGAACA	GGCAAAGAGA	CCTAATTAAG	CACAATTTGT	AGGGTAATTA	GCTTAAGTA	TGTGATTAAC	ACGTTAATTA	GTCGTTAGTA	CGATTGATGA	ATCTTATTAC	TTTTTAATTG	TGCGATTAAG	AGTCAATAAA	ACAAATTAAG	ATCAATTAAC	TCCTGACAGT	AGACCTGACG	TGATTAATGA	AGCCCTCGCA	TAGTTAATTA	TGTACAACAG	TCTTGTTACA	AAACTAACGA	CAATCGTCTA	TTAATTTTTA	GGAAGTTACA	GCCACTTAAC	CATTAATAAC	ACATTAATCA	GCAATTAAGG	GCTATGATTA	CATCGCTATG
	>AbdAG10	>abdb11	>AchiG9	>AlE12	>AntpA11	>ApA10	>AraG11	>AwhC9	>BapA11	>bcd9	>B1HG9	>BH2E10	>BshE10	>BtnE9	>C15A9	>CadE10	>CaupA10	>5CtE9	>dfd9	>DllC9	>DrA10	>E5C9	>emsA9	>eng10	>Eve-G9	>ExdE9	>ExexE9	>FtzG9	>GscA9	>H20C10	>HbnB2	>HgtxC9	>HMXA11	>hthC11	>IndC9	>InvC10	>LabE9	>5Lag1G11	>IbeG10	>LblC9	>LimC10	>Lim3C11	>MirrE9	>NK7E12	>OcA9	>oct10	>OdshC10	>5onectG10	>11617C10
	CACTAATTA	CATATTATGA	GTTGTCAAAA	TGCTAATTAA	CCCTTAATGG	CTAATTAAGG	GTGATATACA	ATAATTATGG	ATCTTATTAC	GAGATAATCC	GTTAATTGA	ACCAATTAAT	AAGATAATGA	AGCCTAATTA	ATCTTAATTG	GAACACTACT	TTCTTTAACA	GAAGTTAAAC	CCCCATTAAT	ACGTAATTAT	TGACTAATTA	ATCAATTAGC	ACATAAATGA	TAGGTAATTA	TGGCTAATTG	CAAGTTGACA	GCTAATTACT	CGCCTAATGA	ATCGTAATCC	GATTAATTAT	AGACTAATTA	CCTCATTATG	AGGAAATGAG	GCGATGACAG	GCGTTAATGA	AGTCAGCATG	ATACTAATTA	AAGTTATTAG	GCTGGTTAAC	CCTGATTAAG	GTTAATTAGC	TTTCATTTAG	AGAACTTACA	TGTCCAAAT	CGCGGATTAG	TGTGATTAAA	AGTAATTACC	TTAATCAATA	ACGTATTGGT
	>AbdAG11	>abdb12	>AchiG10	>AlF1	>AntpA12	>ApA11	>AraG12	>AwhC10	>BapA12	>bcd10	>B1HG10	>BH2E11	>BshE11	>BtnE10	>C15A10	>CadE11	>CaupA11	>5CtE10	>dfd10	>DllC10	>DrA11	>E5C10	>emsA10	>eng11	>Eve-G10	>ExdE10	>ExexE10	>FtzG10	>GscA10	>H20C11	>HbnB3	>HgtxC10	>HMXA12	>hthC12	>IndC10	>InvC11	>LabE10	>5Lag1G12	>IbeG11	>LblC10	>LimC11	>Lim3C12	>MirrE10	>NK7F1	>OcA10	>oct11	>OdshC11	>5onectG11	>11617C11
	CATAATTA	GCATTTATTA	AGATCTGACA	ACACGCTAAT	TAGCACTTTT	ACAAATTAAG	GTTTAGAACA	TTCATTAATA	AGTTAAGTGG	AGCTTATCC	TGTTAAACGG	ATCATTTATC	GTCGATTAAA	AGCAATTATA	TCGTTAATGA	AGCAATTAAG	AAAAATGACA	TATGCTAATC	TTTTTAATGA	TAAGTAATTA	TCGCTAATTA	CCTGTAATGA	ACTAATTAAA	CGGCTAATTA	TCAATTAGAC	ATTTTGACGA	TGTGTAATTA	TAGTTAATTA	TCGTTAATCT	GGATAATTAA	GACAATTAAA	CTTCATAC	TTAATTG	TGTCAAACTC	GTAATTAGTA	TAATTAGAG	CGTTCTTTAA	TCTCTCGCCT	CGCCTAATTA	CCAATTATC	GTTAATTGA	TCTAATTTAT	CCAAAAAACA	TAGCTAATTG	AGGATTAAGG	TCTCATTAGG	GATTTAATTA	CCAAATCAAT	CGTAGTGATA
	>AbdAG12	>abdb13	>AchiH1	>AlF2	>AntpB01	>ApB2	>AraH3	>AwhC11	>BapB1	>bcd11	>B1HG11	>BH2E12	>BshE12	>BtnE11	>C15A11	>CadE12	>CaupA12	>5CtE11	>dfd11	>DllC11	>DrB2	>E5C11	>emsA11	>eng12	>Eve-G11	>ExdE11	>ExexE11	>FtzG11	>GscA11	>H20C12	>HbnB4	>HgtxD1	>HMXE1	>hthD1	>IndC11	>InvC12	>LabE11	>5Lag1H1	>IbeG12	>LblC11	>LimC12	>Lim3D1	>MirrE11	>NK7F2	>OcA11	>oct13	>OdshC12	>5onectG12	>11617C12
	GTTTTAATTA	TTTTTATAAC	ATATCAAATG	GACTAATTAA	TTCATAATTA	TGCCAATATA	TCGAATAACA	TCCTGACAGT	GTTTAAGTGG	CGGGTAATCC	TCACGCCGAG	GCCCATTAGA	GTCGATTAAG	GATAATTAA	ATCATTTAAG	CTAATAAAA	GGCTAAAACA	TAGTTCAAAG	AGCTATTAAA	AGAGTAATTA	CCTCCAATTA	TTTATAATTA	CCAATTATTG	CAATTAAAA	ACACATTAAC	GCGCATGAGA	TGGCTAATTA	CATCATTAAC	TAGGATTATG	GGGTAATTAG	TACAATTAAT	AGCAATTATC	ACGTTAATTA	CCTGTCACTG	GTAATTAATA	CCTAATTAAA	GCTTGATGCG	TGACTATCAG	TCGATTAACTA	CTTGTTAAC	TTAATTAGT	TTTCATTAAA	TAAGAAAACA	GCCTAGGGAG	GCAGATTAAC	CAGCTAATTA	GACAATTAGG	GTCAATCAGA	ATCTTATTAC
	>AbdAH01	>abdb14	>AchiH2	>AlF3	>AntpB02	>ApB3	>AraH5	>AwhC12	>BapB3	>bcd13	>B1HH1	>BH2F1	>BshF1	>BtnE12	>C15A12	>CadF1	>CaupB1	>5CtE12	>dfd12	>DllC12	>DrB3	>E5C12	>emsA12	>eng13	>Eve-G12	>ExdE12	>ExexE12	>FtzG12	>GscA12	>H20D1	>HbnB5	>HgtxD2	>HMXE2	>hthD2	>IndC12	>InvD1	>LabF1	>5Lag1H2	>IbeH1	>LblC12	>LimD1	>Lim3D2	>MirrE12	>NK7F3	>OcB1	>oct14	>OdshD1	>5onectH1	>11617D1
	GGTTGCGGCC	TTATTAATTA	AGCTGTCAGA	CGCTAATTGA	GTGTTAATTA	TCCTTAATGA	AAACATAACA	CACTTGATTA	ACTTATCTGA	TGTTAATCC	CCCTAACATG	ACCAATTATC	GCTCATTAGA	CTCGTAATGA	AATTTAATTG	ACCGTAATTA	GCTAATAACA	ACGCTCGAGC	GCACTAATGA	GATCATTAGA	CGGCCAATTA	TTAATTAGAA	CCATAAATTA	CCAATTAAAA	CCTCATTATG	GCTTTTGACA	AGAGTAATTA	TGCTTAATTA	ACAATAATCC	CTATTATTAA	CTTAATTAAA	CGTAATTAGA	GACTTAATCG	AGCTGTCAAA	CTCATTAACA	CCAATTAAAT	AGTCATTAAG	CATCGCTATG	GCACTAACAA	CCTCGTTAAG	TACTAATTA	ATTAACA	GCAAAAAACA	GAAGCCGCAA	GTGGATTAAT	GCATTAATTT	TACAATTAAT	AAGTTGATTG	GTAGTGCTAG
	>AbdAH02	>abdb15	>AchiH3	>AlF4	>AntpB04	>ApB4	>AraH6	>AwhD1	>BapB4	>bcd14	>B1HH2	>BH2F2	>BshF3	>BtnF1	>C15B1	>CadF2	>CaupB2	>5CtF1	>dfd13	>DllD1	>DrB4	>E5D1	>emsB1	>eng14	>Eve-H1	>ExdF1	>ExexF1	>FtzH1	>GscB1	>H20D2	>HbnB6	>HgtxD3	>HMXE3	>hthD3	>IndD1	>InvD2	>LabF2	>5Lag1H3	>IbeH2	>LblD1	>LimD2	>Lim3D3	>MirrF1	>NK7F4	>OcB2	>oct15	>OdshD2	>5onectH2	>11617D2
	TACGTAACTT	GTTTTATGA	GAAATGACA	TCATAATTAA	GATTTAATTA	CTAATTAAGT	CATGTAAACA	CTCATTAGCG	TCACGCCGAG	TGGGATTATA	CATTGTACTA	GTCATTTAAG	CTACTAATAT	TATCATTATA	GCCAATTAAC	CCAATAAATG	ATTTGTGACA	AGTCCTGAAC	TCGTAATGA	CGTTATTAAG	AAAACAATTA	CCGGGAAGGT	TCTGGAGAGG	TAACTAATTA	GTTAATTAAA	GAGTTGACAT	GGTAATTAGA	GGCTTAATGG	TCGTTAATCT	TGAATATTGA	CTTAATTATC	CTTCATTATT	CCTCTAATTG	TATTTGACAT	CTAATTAAGG	TCAATTAGAG	CTACCAGATT	CCCCTAAATT	CCTCGTTAGT	ACCAATTAAA	ATTAATTAGA	CTCATTAGAT	TCACGCCGAG	GCGCTAATGA	TTCATAATCC	TGGTAAATGA	CCAATTAAAT	ACAAATCAAT	CCGTCTAAAC
	>AbdAH03	>abdb17	>AchiH4	>AlF5	>AntpB06	>ApB5	>AraH7	>AwhD2	>BapB5	>bcd15	>B1HH3	>BH2F3	>BshF4	>BtnF2	>C15B2	>CadF3	>CaupB3	>5CtF2	>dfd14	>DllD2	>DrB5	>E5D2	>emsB2	>eng15	>Eve-H2	>ExdF2	>ExexF2	>FtzH2	>GscB3	>H20D3	>HbnB7	>HgtxD4	>HMXE4	>hthD4	>IndD3	>InvD3	>LabF3	>5Lag1H4	>IbeH3	>LblD2	>LimD3	>Lim3D4	>MirrF2	>NK7F5	>OcB3	>oct16	>OdshD3	>5onectH3	>11617D3
	GGTCATTAAA	AGTTTTATGG	ATCTGTCAGT	CGCTAATTGG	TGTTTAATGA	TCTCATTAAA	TGTTCAGCTA	TGTCTAATTA	TGTTAAGTGG	GCGTAATCCA	GGTAAAGCAT	ACCAATTACA	GCTCATTAGA	CTTAATTAAC	ACCCATTATT	GCCATTAAAG	ACCGGAAACA	GGGATAAAC	TGCTTAATGG	CATAATTTTC	GAACCAATTA	GGTATAATGA	GCCAATTATA	CTCTTAATTG	TCCCATTAAC	ATTTTGATGG	TTCTAATTGA	GAACCTACTT	GGGATTAACA	GCTTAATTGA	ACCAATTAAA	TTAATTAATT	CACTTAATCG	GAGGTGACAG	GTAATTAGAA	TCAATTAAAA	GTAGCCAATG	CTACCATAAA	CACATAATCA	GCTCGTTAAG	TGGTAATTAA	CAATTACC	GATACTTACA	CTTAGATTTT	GAGGATTACG	TCTCATTAAA	TGCTAATTAA	CTGGGCTATA	TAATGCACAC
	>AbdAH04	>abdb18	>AchiH5	>AlF6	>AntpB07	>ApB6	>AraH8	>AwhD3	>BapB6	>bcd16	>B1HH4	>BH2F4	>BshF6	>BtnF3	>C15B4	>CadF4	>CaupB4	>5CtF3	>dfd15	>DllD3	>DrB6	>E5D3	>emsB3	>eng16	>Eve-H3	>ExdF3	>ExexF3	>FtzH3	>GscB4	>H20D4	>HbnB9	>HgtxD5	>HMXE5	>hthD5	>IndD4	>InvD4	>LabF4	>5Lag1H5	>IbeH4	>LblD3	>LimD4	>Lim3D5	>MirrF3	>NK7F6	>OcB4	>oct17	>OdshD4	>5onectH4	>11617D5
	TTTTTTATGA	TCTTTAACGA	AATGGATATT	ACCTAATTAA	TTTTTAATGA	ACTAATTAAT	TTCAAAAACA	GTAATTAGGT	TCTTAAGTGG	GGCTTAAGCC	TCTGTTGAGT	TCCAATTATG	GGCAATTAAC	GGTCATTAAT	GCTAATTAAA	AGTTTAATAA	TCGGTTAACA	CTAATTGAAC	ATCGTAATTA	CTGATAGGCG	CGAGCAATTA	TCAATAGTGC	CTCCATTAAA	CCGATAATTG	AGTCATTAAA	ACTTTGATGA	AGTTAATTAC	CCGTTAATTA	CGAGATTAAG	AGATAATAAT	ATTAATTAAA	TTTTTAATTA	TTATTAATCG	GAAGAAACGT	ACACTAATGA	CTAATTAGAA	CTTCACTGAA	CCACCAAATT	GCTTTAACAA	ACCAATTAAG	TTATAATTAA	CTCAATTAAG	CAAGAAAACA	CAATTAAAA	AGCGATTAAG	GCCCTAATTA	GACTTAATTA	CCAAATCAAG	CTTTTCATCT
	>AbdAH05	>abdb19	>AchiH6	>AlF7	>AntpB08	>ApB7	>AraH9	>AwhD5	>BapB7	>bcd17	>B1HH5	>BH2F5	>BshF7	>BtnF4	>C15B6	>CadF5	>CaupB5	>5CtF4	>dfd16	>DllD4	>DrB7	>E5D4	>emsB5	>eng17	>Eve-H4	>ExdF4	>ExexF4	>FtzH5	>GscB5	>H20D5	>HbnB10	>HgtxD6	>HMXE6	>hthD6	>IndD5	>InvD5	>LabF5	>5Lag1H6	>IbeH5	>LblD4	>LimD6	>Lim3D6	>MirrF4	>NK7F7	>OcB5	>oct18	>OdshD5	>5onectH5	>11617D7
	CTACTAATTC	GCTTTTATTA	GCTGTCAAAA	TAATTAATT	GGCAATTAAG	TCGTTAATGA	AAACATAACA	TCACTAATTA	ACTTAAGTAC	GGTTATCCG	CGTTAATT	ACCAATTATC	GCTAATTAAT	AATATAATGA	ATCTTATTAC	CTATTTATTA	GATAATAACA	AGATTGACTA	CTCATTACT	GGTTAATTAC	GGACCAATTA	GTGTTAATTG	TTTCTAATGA	CGACTAATTA	TGTTTAATGA	GCATTTGACA	TGTAATTAAT	GAGTTAATGA	TCGGATTAAG	CTGTAATAAA	GCTAATTAAC	GCTTTAATTA	CACTTAATTA	AGCTGTCATT	TTGCTAATTA	GTAATTAGTA	CTGTTAATTA	CTACCAAGAT	GCTAATTAAT	ACCAATTATC	GTCCAGATTG	GTCAATTACA	CTGAAAAACA	TCCTTAATAG	CTGGATTAAG	GCTCATTAAC	CCTAATTAAA	AGTCTTGATTT	AGAAACTATG
	>AbdAH06	>abdb20	>AchiH8	>AlF8	>AntpB09	>ApB8	>AraH10	>AwhD6	>BapB8	>bcd18	>B1HH6	>BH2F6	>BshF8	>BtnF5	>C15B7	>CadF6	>CaupB6	>5CtF5	>dfd17	>DllD5	>DrB8	>E5D5	>emsB6	>eng18	>Eve-H5	>ExdF5	>ExexF5	>FtzH6	>GscB6	>H20D6	>HbnB11	>HgtxD7	>HMXE7	>hthD7	>IndD6	>InvD6	>LabF6	>5Lag1H7	>IbeH6	>LblD5	>LimD7	>Lim3D7	>MirrF5	>NK7F8	>OcB6	>oct19	>OdshD6	>5onectH6	>11617D8
	TGCAATTAAA	ACTTTTACGA	CTCTTTAGCC	CACTAATTAC	CGTTTAATTA	TCGCTAATTA	TGCAAAAACA	GTAATTAAAG	GGACCCACAT	TGTTAATCCC	AGTTGACCAC	AGCAATTATA	GCTAATTAAT	GCTAATTATC	TCACGCCGAG	TATTTTATTA	CTAAAAACA	CATTCTGAAC	CTTCATTAAG	CGCAATTAGA	TCTCCAATTA	TAGCTAATGA	TGCCTAATGA	CCAATTAAAA	CGGCTAATTA	CGGTTTGACA	ACTTAATCAC	GCCCTAAGAT	ACGGATTAAA	ACCTCATAAT	CCAATTAAT	CTCATTAAA	TAGTTAATTA	TCACGCCGAG	GTCCTAATTA	GATGCTAAAC	AATGATCGTC	CTACCAAGAT	ACCAATTAAC	CGACTAATGA	GAACCAAAGG	TCAATTAAGA	TTTGAAAACA	GGCAATTAAG	AGGGATTATA	CTCATAATCA	TCTAATTAAG	GGAGAGCCTT	ATAAATGATA
	>AbdAH07	>abdb21	>AchiH10	>AlF9	>AntpB11	>ApB9	>AraH11	>AwhD7	>BapB9	>bcd20	>B1HH7	>BH2F7	>BshF9	>BtnF6	>C15B8	>CadF7	>CaupB7	>5CtF6	>dfd18	>DllD6	>DrB9	>E5D6	>emsB7	>eng19	>Eve-H6	>ExdF6	>ExexF6	>FtzH7	>GscB7	>H20D7		>HgtxD8	>HMXE8	>hthD8	>IndD7	>InvD7	>LabF7	>5Lag12C1	>IbeH7	>LblD6	>LimD8	>Lim3D8	>MirrF6	>NK7F9	>OcB7	>oct20	>OdshD7	>5onectH7	>11617D9
	CGTTCTTTAA	TGATTTATTA	ATTCCGCTCT	GTCTAATTAA	TTTTTAATGA	CGACTAATTA	AGCTTTTACA	TTTTTAATTA	TGTTAAGTGG	CGCTTAATCC	TCACGCCGAG	ATCAATTAAC	GCTCGTTAAG	CGTAATTAAT	GCTAATTAAT	GCAATAAACA	TGAAAAACA	AGCCTTGAAC	AGTCATTAGG	CGCAATTATA	TGAGTAATTA	AGTTGACGC	TCACTAATTA	CTCAATTAAG	TTGCTAATTA	TGTTTGATGA	TCTAATTAA	CTGTTAATTA	CCCCTAATCC	AATTTATTAA		ACTTTAATTA	CCACTAATTA	ATACCCGTGC	TCACTAATGA	CCAATTAGTT	GTCCAGATTG	GTGGTATGCT	GCTAATTAAC	CTGCTAATCA	CTACTAATAT	ACTAATTAAC	ACGCCTGACA	ACCAATTAAG	GAGTTAATCC	AGTTTAATTG	CCGCTAATTA	GCAAATCAAC	GTTAGTGATA
	>AbdAH08	>abdb22	>AchiH11	>AlF10	>AntpB12	>ApB10	>Ara2G1	>AwhD8	>BapB10	>bcd21	>B1HH8	>BH2F8	>BshF10	>BtnF7	>C15B9	>CadF8	>CaupB9	>5CtF7	>dfd19	>DllD7	>DrB10	>E5D7	>emsB8	>eng20	>Eve-H7	>ExdF7	>ExexF7	>FtzH8	>GscB8	>H20D8		>HgtxD9	>HMXE9	>hthD9	>IndD8	>InvD8	>LabF8	>5Lag12C2	>IbeH8	>LblD7	>LimD9	>Lim3D9	>MirrF7	>NK7F10	>OcB8	>oct21	>OdshD8	>5onectH8	>11617D10
	GATTTAATTA	TGATTTATTA	GCTGTCAAAG	GGCTAATTAA	CCTTTAATGA	CGCTAATGA	ACCCCAAACA	CAATTAGCG	TCTTCCATTA	TTACTAATCC	GCTGTTATTT	AGCAATTAAC	GCCAATTATA	AGTCATTAAG	CCTATTTAAA	CTCAATAAAA	CGCAGCAACA	GTACTTAAAC	TACCTAATGA	TCCAATTACG	TCAGCAATTA	TGGCTAATTA	GGTCTAATGA	GCGTTAATGA	ACACTAATTA	AATTTTGACA	ACTAATTAG	GGGTTAATTA	GGGATTAACA	ATCTAATTAA		GTTTTAATGA	TGTTTAATTG	TGTCATTGTA	GCAATTAATA	TCAATTAAAA	CGTTAATT	TCCCTCACTG	TTGTTATC	GCTAATTAAT	AGTTCACGGG	ATTAATCAAC	CGAATTTACA	CGCTTAATTA	CTGGATTAGT	GAGATAATTC	GTCAATTAGT	GTTATGCGTC	ATAAGTGATA
	>AbdAH09	>abdb23	>achi2F1	>AlF11		>ApB11	>Ara2G2	>AwhD9	>BapB11	>bcd22	>B1HH9	>BH2F9	>BshF11	>BtnF8	>C15B10	>CadF9	>CaupB10	>5CtF8	>dfd20	>DllD8	>DrB11	>E5D8	>emsB9	>eng21	>Eve-H8	>ExdF9	>ExexF8	>FtzH9	>GscB9	>H20D9		>HgtxD10	>HMXE10	>hthD10	>IndD9	>InvD9	>LabF9	>5Lag12C3	>IbeH9	>LblD8	>LimD10	>Lim3D10	>MirrF8	>NK7F11	>OcB9	>oct22	>OdshD9	>5onectH9	>11617D11
	GCGCTAATGA	TCTTTAATTA	CGAATGACAA	CCCTAATTGA		CTAATTAGCA	GCAATTAACA	TAGTTAATTA	CGTTAAGTGG	GTCCTAATCC	GGCAATTAAG	ATCAATTAAC	ACCAATTACA	GACTTAATGA	TCACAATCAC	ATCATAAAAC	AACTGTAACA	GTGGTTGAAC	TGGATAATGA	TGGATAATTA	GCCCCAATTA	ATATTAATTA	CCAATTAGAG	GCTAATTAAG	GTAATTAGTA	GTCTTTGACA	TGGCTAATTA	TTTTTAATGA	TGGATTAGGA	TGCTAATAAA		TAGTTAATGA	TATTTAATTG	ACGCTCGAGC	CCACTAATTA	ATTCCGCTCT	GGTCATTAAT	TCGTACGAAT	ACCAATTAAC	GCTAATTAAT	GCTAATTAAT	TAATTAGCC	GCTCAAAACA	TGACTAATTA	AGGATTAAT	GGTTTAATTT	TTCAATTACA	CCACCATTTT	CGTAGTGATA
	>AbdAH10	>abdb24	>achi2F2	>AlF12			>Ara2G3	>AwhD10	>Bap2C1	>bcd23	>B1HH10	>BH2F10		>BtnF9	>C15B11	>CadF10	>CaupB11	>5CtF9	>dfd21	>DllD9	>DrB12	>E5D9	>emsB10	>eng22	>Eve-H9	>ExdF10	>ExexF9	>FtzH10	>GscB10	>H20D10		>HgtxD11	>HMXE11	>hthD11	>IndD10	>InvD10	>LabF10	>5Lag12C4	>IbeH10	>LblD9	>LimD11	>Lim3D11	>MirrF9	>NK72A2	>OcB10	>oct23	>OdshD10	>5onectH10	>11617D12
	TGTTTAATGA	TGTTTTATGA	TGTTGTCAAA	GTTAATTAAA			GCAAGTTACA	GTACTAATGA	ACACTTAAAG	GGTTAATCCG	CCCGTTCGTG	ATCAATTAAG		TCCTTAATGA	GGCAATTAAC	ATTCCGCTCT	ATAAAAAACA	TGGCTAAAAC	CGACTAATGA	AGTAATTACA	AGTCCAATTA	AATCTAATTA	CTAATTAGAG	CCAATTAAAC	TTGCTAATGA	AGTCTGTGGT	AGCAATTAAA	ATATTAATTA	ATGGATTAGT	CGTTTATTAA		AGTTTAATTA	ATCACTTGCA	TTTCGTGACA	TCCCTAATTA	TCACGCCGAG	CAGGCACCCA	ACTACAAAGG	CCTCGTTAAA	CGACTAATGA	AGTTAATTAA	CTAATTAGAT	CTAGAAAACA	ATCATTAAAC	TCGGATTAAG	GCTTTAATTT	CTTAATTAAC	CCCAATCAAA	AGAGATGATA
	>AbdAH11		>achi2F3				>Ara2G4	>AwhD11	>Bap2C2	>bcd24	>BH12E2	>BH2F11		>BtnF10		>CadF11		>5CtF10	>dfd22	>DllD10		>E5D10	>emsB11	>eng23	>Eve-H10		>ExexF10	>FtzH11	>GscB11	>H20D11			>HMXE12		>IndD11	>InvD11	>LabF11	>5Lag12C5	>IbeH11	>LblD10	>Lim1C1a		>MirrF10	>NK72A3	>OcB11	>oct24	>OdshD11	>5onectH11	>OptixE1
	GGCAATTAAG		CTGTCAATC				TAAGAGAACA	TACCTAATGA	ACTTAAGTAC	ATGGATTAGA	TTCTAAACGG	ACCAATTAAG		ACGTTAATGA		GTAATAAAGT		TGTCTTGAAC	TATCATTAAC	CTAATTACA		GCACTAATGA	CTAATTAGCG	TCAATTAAG	CCTCATTAAT		CATGTAATTA	TTGTTAATGA	GGATTAATG	ATTTTATGAG			AGTTCTTAAG		CTAATTAGCA	GGTAATTAAC	AGTCTAATGA	CTACCAGAAG	CCTCGTTAAG	CCTCGTTAAG	CCCCCAATTT		GCACAAAACA	TACTTAAGTG	CCGGATTAAC	CTGATAATTA	CTCAATTACC	CTAATCAACG	TCTTCCATTA
	>AbdAH12		>achi2F4				>Ara2G5	>Awh2A1	>Bap2C3		>BH12E3			>BtnF11		>Cad2E1		>5CtF11	>dfd23	>DllD11		>E5D11		>eng24	>Eve-H11		>ExexF11						>HMXF1				>LabH3	>5Lag12C6		>LblD11	>Lim1C2a		>MirrF11	>NK72A4					>OptixE2
	ATCTTAATTAC		AGCTGTCAAA				CATATAAACA	GCCTTAATTT	TTTTAAGTGT		GCCAATTAAC			GAGTTAATGA		CCAATAAAGG		CGTCCTGAAC	CCGTTAATGA	CTACTAATTA		TGACTAATGA		CGGCTAATTA	GGTCATTAAC		CGCTAATTAA						TTGTCTTCGA				GCTGTTATTT	GGTATACGAC		CGACTAATGA	CTATAATTAG		CAAAATAACA	CGCCGTTCAG					GTAGCCAATG
			>achi2F5				>Ara2G6	>Awh2A2	>Bap2C4		>BH12E4					>Cad2E2			>dfd24			>E52C1											>HMXF2				>LabH5	>5Lag12C7			>Lim1C3a		>Mirr2C2	>NK72A5					>OptixE3
			AAACTAAGAT				GGGAAAAACA	CTAATCAAAT	CTGTAAGTGT		GGCTAATTGA					GACATTATTA			CAATTAATGA			TGACTAATAG											TCACGCCGAG				GTGCGCGCAG	CCACCAAATA			AAAAGGATTC		TGCAGAAACA	GTCCATTAAA					CGTTCTTTAA
			>achi2F6				>Ara2G7	>Awh2A3	>Bap2C5		>BH12E5					>Cad2E3						>E52C2											>HMXF4				>LabH6	>5Lag12C8			>Lim1C4a		>Mirr2C3	>NK72A6					>OptixE4
			TAAGATGACA				GGTAATAACA	TTAATTATC	GACTTAAGTG		AGTTAATAGG					GCTAATAAAT						CCCATTAACC											TGCAATTAAG				GTGTTAATTA	GAGACGAGAT			TCGTTTTGAA		CTAACAAACA	TGCTATTAAG					CCCTAACATG
			>achi2F8				>Ara2G8	>Awh2A4	>Bap2C6		>BH12E6					>Cad2E4						>E52C3											>HMXF6				>LabH7	>5Lag12C9			>Lim1C5a		>Mirr2C4	>NK72A7					>OptixE5
			CCTGTCAAA				GTGTAGAACA	CTTTTGATTA	GCTTAAGTGC		AACAATTAAC					TTATTTATTA						GGGCTAAATA											ATCAGTCCTT				GTCTTAATTA	CCACCATAAT			TGTCCAAAT		CTGTACTACA	GACAATTATA					GAACCTACTT
			>achi2F9				>Ara2G10	>Awh2A8	>Bap2C7		>BH12E7					>Cad2E5						>E52C4											>HMXF7				>LabH8	>5Lag12C10			>Lim1C6a		>Mirr2C5	>NK72A8					>OptixE6
			GTCCAGATTG				CCTGAAAACA	ACCTAAATGA	ACTTAAGAAC		ATCAATTAAC					TCGAGCATGT						TTCATTACGT											ATGAACTTGA				TCACGCCGAG	TAGTAATATT			CGGGGAACGT		ACTTCGAACA	TTAATTAAAA					ATCTTAATTAC
			>achi2F10				>Ara2G11	>Awh2A9	>Bap2C8		>BH12E8					>Cad2E7						>E52C5											>HMXF8				>LabH9	>5Lag12C11			>Lim1C9a		>Mirr2C7	>NK72A9					>OptixE7
			GTCCAGATTG				GAAAGAACA	TCTAATTAAA	TCTTAAGTAC		AGCAATTATG					ACTCTAATTG						CACTATTAAG											GGCAATTAAG				CTACTAAATT	CTACCATGTT			GCCTAATTAA		AGATTTAACA	GACATAATAG					GTGCGTACTG
			>achi2F11				>Ara2G12	>Awh2A10	>Bap2C9		>BH12E9					>Cad2E8						>E52C6											>HMXF9				>LabH10	>5Lag12C12			>Lim1C10a		>Mirr2C8	>NK72A10					>OptixE8
			TGCTGTCAAA				AGAATTAACA	CCAATTAGCA	ATTTAAGTGA		TGTTAAACGG					CCAATAAACT						CATTAAATGA											GGGAATGAG				TATCGCCCAC	ACTCTGCTTA			GTTAATTACC		GCTTGTAACA	GAGATAATGA					GGAAGTGATA
			>achi2F12				>Ara2H1	>Awh2A11	>Bap2C10		>BH12E10					>Cad2E9						>E52C7											>HMXF10				>LabH11	>5Lag12D1			>Lim1C11a		>Mirr2C9	>NK72A11					>OptixE9
			CCTGTCAAAC				GGAAAAAACA	CATAATTA	TATTAAGTAC		TCTTAAACGG					GCAATCATTA						GACTTAATAA											CGGAGAATTT				AATGATCGTC	CCCCTGGAAT			CCGTGTTAGT		AGAGAAAACA	GCTATCAATA					ATCTTATTAC
							>Ara2H2	>Awh2A12	>Bap2C12		>BH12E11					>Cad2E10						>E52C8											>HMXF11				>LabH12	>5Lag12D2			>Lim1C12a		>Mirr2C10	>NK72A12					>OptixE10
							TCCCAAAACA	TTAATTAGGC	TTTTAAGTGA		TCTTAAACGG					CCTTAAATTA						TCAATAATGA											TCGTCATGCG				TACATAATGA	TGTGATATAG			ATTATACTGT		ACATTTACA	ACATTAAATG					CTACTAAATT
							>Ara2H3	>Awh2B1	>Bap2D2		>BH12E12					>Cad2E11						>E52C9																>5Lag12D3			>Lim1D2a		>Mirr2C11	>NK72B2					>OptixE11
							TGAAGCCTTG	TAGTTAATTA	CTTTAAGTAC		AGATAATTGC					AAAAGGATTC						GAACCCACA																TACAAATAT			TACTAATTAA		CCTGAAAACA	TGGTTAAATA					ATCAGTCCTT
							>Ara2H4	>Awh2B2	>Bap2D3		>BH12F1					>Cad2E12						>E52C10																>5Lag12D4			>Lim1D4a		>Mirr2C12	>NK72B3					>OptixE12
							TCAAATTACA	AAGATAATTA	GGTTAAGTGG		GGATAATTGA					AGGCACTACG						ATTCATTAGT																CCACTAGATT			AATTAATTAT		GTGATATACA	GCCGATGACT					CTACCAGATC
							>Ara2H6	>Awh2B3	>Bap2D4		>BH12F2					>Cad2F1						>E52C11																>5Lag12D5			>Lim1D6a		>Mirr2D1	>NK72B4					>Optix2A2
							TGGAAAAACA	ATAATTAAG	CTTTATAACT		ACTTAAACGT					GTTCTAATTA						CGGGTAATTA																GCGCATGAGA			TTTTAATTAA		ATCTCTTACA	GAATTAAGTG					GCCCATGATA
							>Ara2H8	>Awh2B4	>Bap2D5		>BH12F3					>Cad2F2						>E52C12																>5Lag12D7			>Lim1D9a		>Mirr2D2	>NK72B5					>Optix2A3
							TAACATTACA	TAACTAATTA	CTTTATAACT		GATAATTAA					CTCATAAACA						GGTTTAATGA																CTACTAAAAC			ACTAATTAAA		GGAAATTACA	ACTATTAATA					ACATGTGATA
							>Ara2H9	>Awh2B5	>Bap2D6		>BH12F4					>Cad2F3						>E52D1																>5Lag12D8			>Lim1D10a		>Mirr2D3	>NK72B6					>Optix2A4
							CTACAAAACA	CCACTAATTT	ACTTAACGT		CTTTAAACGG					GGATTTATAA						GATGTAATGA																CTACTAGTAT			TGCTAATTAA		GGATATAACA	AACCATCAAT					GGAGCTGATA
							>Ara2H10	>Awh2B6	>Bap2D9		>BH12F5					>Cad2F4						>E52D2																>5Lag12D9			>Lim1D11a		>Mirr2D4	>NK72B7					>Optix2A5
							AGAGAAAACA	ATCCTAATTA	TTAAGTACC		ATTGGCCACC					ACCATAATTA						TTTTTAATTA																CCACCAAAAT			TTTAATTACA		GTGTTAAACA	GTATTAATGA					CAATCTGATA
							>Ara2H11	>Awh2B7	>Bap2D10		>BH12F6					>Cad2F5						>E52D3																>5Lag12D10					>Mirr2D5	>NK72B8					>Optix2A6
							ATGAATTACA	TCTAATTAAA	ATTTAAGTGA		AACATTTAAT					GCAATAAAAA						CGCATAATTA																CTACCAACCT					CGCATAAACA	CGTAATTAAG					GTAGCTGATA
								>Awh2B8	>Bap2D11		>BH12F8					>Cad2F6						>E52D4																>5Lag12D11					>Mirr2D6	>NK72B9					>Optix2A7
								CTATTAATTA	ACTTAAGTAC		TTGGGTACAA					CTTTTTATTG						CCGTTAATAG																CCTCCCGCAC					TAAGTTACA	CCACTAATTA					TACCCACGCC
								>Awh2B9			>BH12F9					>Cad2F7						>E52D5																					>Mirr2D7	>NK72B10					>Optix2A9
								ACCCTAATGA			GTCGGTACCC					CCCATAAATT						AAACTAATTA																					CCTGAAAACA	GCCTATTAAA					GAAGTGATAG
								>Awh2B10			>BH12F10					>Cad2F9						>E52D6																					>Mirr2D8	>NK72B11					>Optix2A10
								TAGTTAATGA			CTACCAGATT					GTTTTTATGA						TCAATTAAGA																					CTAGTTTACA	CCAATTAAGG					AACCGCGATA
								>Awh2B11			>BH12F11					>Cad2F10						>E52D7																					>Mirr2D9						>Optix2A11
								CCTCTAATTG			TTCTAATTGA					CCCATATAAT						ACATTAATGA																					TTAGAAAACA						GTGATTGATA
																>Cad2F11						>E52D8																					>Mirr2D10						>Optix2A12
																GCAATAAAAA						ACAATAATTA																					CTCAATAACA						TCCCTTGATA
																						>E52D9																					>Mirr2D11						>Optix2B1
																						CATCTAATGA																					TTGAATAACA						ATTCGCGATA
																						>E52D10																											>Optix2B2
																						ACGGTAATTA																											TTTCTGCGTG
																						>E52D11																											>Optix2B3
																						AGTAATTAGC																											CATTGCGATA
																																																	>Optix2B4
																																																	GTGATTGATA
																																																	>Optix2B5
																																																	CCAAGTGATA
																																																	>Optix2B6
																																																	ATAAGTGATA
																																																	>Optix2B7
																																																	CGTTATGATA
																																																	>Optix2B8
																																																	CTTTCTGATA
																																																	>Optix2B9
																																																	ATTCAAACA
[truncated: 36 more columns]
