# Supplementary material for: Learning probabilistic protein–DNA recognition codes from DNA-binding specificities using structural mappings
Source: HighWire-hosted journal article supplement (doi:10.1101/gr.276606.122), 2022-09-01
Supplement: SUPPLEMENTAL_Matl.zip [file Stamp_Results_Homeodomain_09-21-20.pdf › SUPPLEMENTAL_Matl/rCLAMPS/STAMP/Stamp_Results_Homeodomain_09-21-20.pdf]

Jump to: [Multiple Alignment](#) [Motif Tree](#) [Motif Matching](#)

[Input file: 509 motifs loaded](#)

Settings: Metric=PCC, Alignment=SWU, Gap-open=1000, Gap-extend=1000, -nooverlapalign

Multiple Alignment=IR, Tree=UPGMA, Matching against: JASPAR

Note: All results files are removed nightly at midnight EST. Please save your results by saving "Webpage, complete".

[Download results as a PDF](#)

[Click here to run STAMP again.](#)

## Multiple Alignment

(Consensus sequence representations shown, but multiple alignment was carried out on the matrices)

```

PHDP:          -----NTAATNNNATTAN-----
Prrx1:         -----NNNAATTA-----
Pknex1:        -----NGACANN-----
LHX1:          -----NYNATTAN-----
LHX2:          -----NNNNTTNNNN-----
LHX4:          -----NTAATTAN-----
LHX6:          -----NYAATCAN-----
CBG04010:      -----NNNMATTAANN-----
LHX9:          -----NNTNATTAN-----
PK24181.1:     -----NNNNNNNNNN-----
IRX5:          -----NNNTGTNNNACAYNN-----
IRX2:          -----NWACAYGACANN-----
pal-1:         -----TTWATTAC-----
GSC2:          -----NNNATTAN-----
Isl2:          -----NNNTNNN-----
WOX13:         -----NNTGATTGAN-----
Q0N4F9_NEMVE:  -----MTAATTAN-----
hox12:         -----TTWATKAC-----
eve:           -----NSTAATTAGN-----
ZHD7:          -----NNNNNTTANN-----
OdsH:          -----NYAATTAN-----
unc-62:        -----NNNTNTNNN-----
NEMVEDRAFT_v1g113057: -----NNGGATTARN-----
DLX3:          -----NYAATTAN-----
HBX4_ECHGR:    -----NNGGATTANN-----
Q7M3U4_ACRFO:  -----NNNAATTANNN-----
Hoxb8:         -----NNNNATWNN-----
Hoxb9:         -----NNNNRTWAAN-----
Hoxb3:         -----NNNNATTAN-----
Six6:          -----NNKATNN-----

```

## Stamp Results

09/21/20

```

GSX1: -----NTNATKAN-----
Hoxb6: -----NNNNNNNN-----
Hoxb7: -----NNNNTNNN-----
Hoxb4: -----NNNNATTAN-----
ENSCING00000016045: -----NCYAATTARNN-----
Hoxc11: -----NNNNRTWAAN-----
ceh-36: -----NNGATTAN-----
Hoxc13: -----NTTTAYNNNN-----
Hoxc12: -----NNTWAYNNNN-----
VSX2: -----CTAATTAN-----
HOXB8: -----GYMATTAN-----
HOXB9: -----NTTTTACGAC-----
SNAPOd2T00006145001: -----NNTRATTRNN-----
HOXB2: -----NYAATTAN-----
HOXB3: -----NNYMATTANN-----
HOXB6: -----GYMATTAN-----
HOXB7: -----NYAATTAN-----
HOXB5: -----NYMATTAN-----
HOXC11: -----NNTTTACGAYN-----
HOXC13: -----NTTTTATTGSN-----
HOXC12: -----NTTTTATTACN-----
Hoxd12_CONSTRUCT: -----NNTNAYNNNN-----
six3: -----NNNATMNNNN-----
hbn: -----NTAATTTAATTAN-----
Hoxa6: -----NNNNATTAN-----
HDG11: -----NCATTWAWKN-----
barx1: -----NNNNATTAN-----
pbx4: -----NNCATCAA-----
Duxbl1: -----NTGATTRNN-----
Hmx2: -----NNNCRNTTNN-----
ceh-24: -----NNYNCTYNN-----
ceh-23: -----NNNTAATTAN-----
ceh-22: -----NNNCACTTNA-----
vis: -----TGACAN-----
Dfd: -----NNYCATTANN-----
BSX: -----NNCGTTAN-----
B-H2: -----NNCGTTTANN-----
B-H1: -----NNCGTTTANN-----
CG5369: -----TAATNNAATTA-----
ceh-90: -----NGTTTTANN-----
BARX1: -----NNATTAAAWANCNATTA
CNK00090: -----ATAATTAA-----
Gbx2: -----NNYAATTANN-----

```

## Stamp Results

09/21/20

|                       |                        |
|-----------------------|------------------------|
| Gbx1:                 | -----NNYAATTANN-----   |
| Hlx:                  | -----NNNAWNN-----      |
| SNOG_08903:           | -----TTGATTTR-----     |
| EMX2:                 | -----NTAATTAG-----     |
| EMX1:                 | -----NTAATTAN-----     |
| Gsx2:                 | -----NNNNATTAN-----    |
| GRMZM2G087741:        | -----NNTGACRKC-----    |
| Pdx1:                 | -----NNNATTAN-----     |
| cad:                  | -----NTTTTATKGCNN----- |
| C4B866_NEMVE:         | -----NNTTAATTANNN----- |
| oc:                   | -----NGGATTAN-----     |
| Q0N4H2_NEMVE:         | -----ANYAATTA-----     |
| Q9GP48_9TURB:         | -----NTAATTAN-----     |
| Pph13:                | -----NYAATTAN-----     |
| Q24782_9CNID:         | -----TTAATTAA-----     |
| Esx1:                 | -----NAATTANN-----     |
| Q70HR3_PLEPI:         | -----NNNTACTTAN-----   |
| Nobox:                | -----NNYNATNNN-----    |
| Bsx:                  | -----NNNNATTAN-----    |
| ventx1.1.L:           | -----NNNNNNNNNN-----   |
| ceh-5:                | -----NNNATTANN-----    |
| HNF1B:                | -----GTTAATNATTAA----- |
| POU5F1B:              | -----NNNTTNN-----      |
| AAZ08039:             | -----NNYAATTANN-----   |
| PROP1:                | -----NAAYNNAATTA-----  |
| Optix:                | -----TAATTARATTA-----  |
| YHP1:                 | -----NWWATTRNN-----    |
| Hoxb13:               | -----NTTWAYNNNN-----   |
| ATEG_00670:           | -----NNNNACNNN-----    |
| TVAG_451170:          | -----NNCRCATCAN-----   |
| lab:                  | -----STAATTAN-----     |
| Nkx2-9:               | -----NNRAGTRNNN-----   |
| Prop1:                | -----NRATNNN-----      |
| PHOX2A:               | -----NNAATTAN-----     |
| Nkx2-3:               | -----NNRAGNRNN-----    |
| PHOX2B:               | -----NYAATTAN-----     |
| Nkx2-6:               | -----NNNCACTTNN-----   |
| CG2808:               | -----TAATSNAATTA-----  |
| HOXB13:               | -----NTTTTATTGGN-----  |
| HMBOX1:               | -----NCTAGTTAN-----    |
| Ptx1:                 | -----NGGATTAN-----     |
| caup:                 | -----NWNTAACA-----     |
| NEMVEDRAFT_v1g101664: | -----GATYGATT-----     |

## Stamp Results

09/21/20

```

zfhx4: -----NYAATTANN-----
unc-4: -----TAATTNAATTA-----
Ubx: -----NYAATTAN-----
Rx: -----NYAATTAN-----
SNAPod2T00005194001: -----NNACATGTANN-----
CBG24578: -----NNNTGACAGSTN-----
Nkx6-3: -----NNNATNANN-----
Nkx6-1: -----NYNATTANN-----
MTR_2g038000: -----NNNNNAGNNN-----
Q9C1N5_COPSC: -----NNGATTGNN-----
SIX6: -----NNNTATCRNN-----
SIX3: -----NNNTATCRNN-----
Barx2: -----NNNNATTAN-----
HNF1A: -----NRTTAATNATTAACN-----
Vsx1: -----NCAATTAN-----
Vsx2: -----NYAATTAN-----
RAX: -----YTAATTAN-----
GRMZM2G135447: -----NTGACRKS-----
Hoxa13: -----NTTWAYNNN-----
DPRX: -----NGGATTATCN-----
ESX1: -----NYAATTAN-----
SHOX2: -----NYAATTAN-----
Hoxa10: -----NNNNNTNNN-----
hoxd13a: -----WTTTATKA-----
Tlx2: -----ATTAAWTA-----
ceh-62: -----NNTAATTANN-----
Hoxa5: -----NNNNATTAN-----
Nkx2-1: -----NNRAGNRN-----
en: -----NYAATTAN-----
NOBOX: -----NNNNATNRNN-----
Otx1: -----NNTAATCGGATTANN-----
abd-A: -----NGTAATTANN-----
Dll: -----NYAATTAN-----
Lhx6_CONSTRUCT: -----NYAATYANN-----
pha-2: -----NNNATNNNNN-----
MNX1: -----NTAATTAN-----
Cphx1: -----WGATNNNNNN-----
CG11085: -----NCRATTAN-----
ftz: -----GTAATTAA-----
uncx: -----NYAATTANN-----
EN1: -----NYAATTAN-----
EN2: -----NTAATTAN-----
E5: -----NNNATTAN-----

```

## Stamp Results

09/21/20

|                       |                        |
|-----------------------|------------------------|
| ro:                   | -----TAATTARN-----     |
| lms:                  | -----NYAATTAN-----     |
| TOS8:                 | -----NNNTGACGTMW-----  |
| Hoxa7:                | -----NNNNATWNN-----    |
| En1:                  | -----NNNANNN-----      |
| En2:                  | -----NSTAATTANN-----   |
| Hoxa4:                | -----NNNNATTAN-----    |
| Hoxa3:                | -----NNNYNATTAN-----   |
| Hoxa2:                | -----NNTAATTANN-----   |
| Hoxa1:                | -----NNYNATTNN-----    |
| NANOG:                | -----NCNRTYAN-----     |
| Hoxa9:                | -----NNNNNNNN-----     |
| Nanog:                | -----NNNNATNNN-----    |
| HAT1:                 | -----NNATGATTRN-----   |
| HAT3:                 | -----NTGATTRN-----     |
| NCU03266:             | -----NYNATTWNNN-----   |
| Q0N4H9_NEMVE:         | -----NNNNTYRNN-----    |
| PDX1:                 | -----NTMATTAR-----     |
| NK7.1:                | -----NACCGTTTAAN-----  |
| ISX:                  | -----CTAATTAN-----     |
| Q70LF3_ARTSF:         | -----NTAATTAN-----     |
| Hoxa11:               | -----NNNTTTACGANN----- |
| ZFHX2:                | -----NNTAATTANN-----   |
| Nkx2-2:               | -----NNNRAGNRN-----    |
| Q9BJW6_9CNID:         | -----NNTAATTAGN-----   |
| CAD26261:             | -----TWWATTANN-----    |
| NEMVEDRAFT_v1g129868: | -----NNNNNTNRN-----    |
| KNAT6:                | -----NNNGACNNNN-----   |
| Hmx:                  | -----NCAMTTAN-----     |
| Lim3:                 | -----NTAATTAN-----     |
| Lim1:                 | -----NYAATTAN-----     |
| PRH_PETCR:            | -----ATATATWA-----     |
| Abd-B:                | -----NWTTTACGACN-----  |
| Nkx2-4:               | -----NNRAGNRNNN-----   |
| Nkx3-1:               | -----NNAAGTGNNN-----   |
| Otp:                  | -----NNATTANN-----     |
| Nkx2-5:               | -----NNNRAGNRNN-----   |
| Nkx3-2:               | -----NNAAGTRNN-----    |
| ceh-19:               | -----NNCNATTAN-----    |
| Meis3:                | -----NTGACAN-----      |
| Q24780_9CNID:         | -----NNTTAATTANN-----  |
| ATHB-12:              | -----NNNNNNNN-----     |
| ATHB-16:              | -----AATKATTA-----     |

## Stamp Results

09/21/20

```

Q00354_COPCI: -----NGATTGGT-----
AGAP009986: -----NNNACANNNN-----
Mnx1: -----NNNNNATTAN-----
Q86SD7_PODCA: -----NNTAATTANN-----
Antp: -----TMATTAAR-----
HOXA7: -----NYMATTAN-----
HOXA6: -----NGYMATTANN-----
HOXA5: -----STAATTAS-----
HOXA4: -----RTMATTAN-----
HOXA2: -----NTAATTAN-----
HOXA1: -----NNTAATTANN-----
Q8VHG7_MOUSE: -----NGGATTAW-----
HOXA9: -----NNNTTTAYGAYN-----
Obox6: -----NNRGATTAN-----
Obox5: -----NNNATNAN-----
Obox3: -----NNATNWN-----
Obox1: -----NNNGGATTAN-----
lbe: -----NNTCGTTA-----
PITX2: -----NGGATTAN-----
PITX3: -----NGGATTAN-----
PITX1: -----NGGATTAN-----
lbl: -----CTMATTAN-----
CBG07641: -----NNTAATTANN-----
HXD12_HETFR: -----TTAATTAC-----
DMBX1: -----NGGATTAN-----
ENSTNIG00000004116: -----CTAATTAA-----
ALX3: -----NYAATTAN-----
ALX1: -----NTAAYNYAATTAN-----
Emx2: -----NNNNATTAN-----
ALX4: -----NYAATTAN-----
Dr: -----NNYAATTA-----
NEMVEDRAFT_v1g114268: -----AYCNATTAN-----
vnd: -----TYTCAAGTR-----
Smp_158000: -----CYAATTAA-----
CG32105: -----YTAATTAA-----
DRGX: -----NYAATTAN-----
Q68SS9_PLEDJ: -----NGATTGNN-----
bsh: -----TAATYTAATTA-----
Dlx5: -----NNNATTW-----
PBX4: -----NNNNNTNNNN-----
exex: -----NNNNYAATTNNCNN-----
PBX1: -----NTGATTGAYR-----
SNAPOd2T00003340001: -----NWWATTANN-----

```

## Stamp Results

09/21/20

```

exd:-----NTTTGACA-----
CBG10835:-----NNNNTCANN-----
TLX2:-----NYAATTAN-----
TLX3:---NAATTGNNNNNNNNNNNNNNNCAATTN-
GSX2:-----SYMATTAN-----
TGIF2:-----TGACANNTGTCA--
TGIF1:-----TGACAGCTGTCA--
Dmbx1:-----NNRGATTAN-----
Rhox6:-----NNNATTAN-----
CG18599:-----TAATTAN-----
Rhox8:-----NTTACACCN-----
Uncx:-----NTAATYNAATTAN-----
Hoxb5:-----NNNNATNAN-----
Tgif2:-----NNTGACANNN-----
Tgif1:-----NNTGACANNN-----
slou:-----NNYAATTANN-----
Hoxd8:-----NNNNNNNN-----
Hoxd9:-----NCCATWAAA-----
Hoxc10:-----NTTTTAYGAC-----
yox1:-----NNNNATNNNN-----
Hoxd3:-----NNYAATTANN-----
POU6F1:-----NNTAATTANN-----
Q0N4H7_NEMVE:-----NNNNNATNNN-----
HOXD8:-----GYMATTAN-----
HOXD9:-----NTTTTATTGC-----
HOXD4:-----NYMATTAN-----
zen:-----NTMATTAN-----
EVX1:-----NTAATTAN-----
EVX2:-----NTAATTAN-----
repo:-----NYTAATTAAN-----
hbx4:-----NNTGACRNNN-----
hbx2:-----NNATATATWN-----
vsx2:-----NYTAATTAANN-----
hbx9:-----NNTGACAN-----
Six3:-----NKATNNN-----
bap:-----NNCACTTANN-----
Hnf1b:-----NNNGTNNN-----
NKX2-8:-----NNRAGNRN-----
Otx2:-----NNGATTAN-----
SNAPOd2T00006620001:-----NYAATTAN-----
ems:-----NTAATTAN-----
PRRX1:-----NYAATTAN-----
CG15696:-----NNNATTRNN-----

```

## Stamp Results

09/21/20

```

PRRX2: -----NNCRTNAN-----
CRX: -----NSGGATTAGN-----
hbx5-2: -----WTGATTRN-----
Meis2: -----NTGACAN-----
Meis1: -----NTGACANNN-----
hbx5-1: -----TTGATTGR-----
ara: -----NNAWAACA-----
VENTX: -----CTAATTAN-----
btn: -----NNTMATTANN-----
CAGL0H02959g: -----NNTGACRNNN-----
MEIS2: -----TGACAGCTGTCA--
MEIS1: -----NTGACAN-----
tup: -----CMATTAWS-----
ceh-58: -----NNYAATTANN-----
Awh: -----NTAATTAN-----
ceh-54: -----NNYAATTAN-----
Dobox5_CONSTRUCT: -----NNRGATTAN-----
ceh-57: -----NNNNNTWAN-----
ceh-51: -----NNNATNRNN-----
ceh-53: -----NRGATTAN-----
PHO2: -----NNNNNATNNN-----
Q6WL90_TRICY: -----NNNATTAN-----
LBX2: -----CTCRTTAA-----
LBX1: -----CTAATTAN-----
PKNOX1: -----TGACASSTGTCA--
PKNOX2: -----TGACANNGTGTCA--
CBG23031: -----NNNNATWAAN-----
HOXC10: -----NNTTTATKRCN-----
NEMVEDRAFT_v1g81436: -----NNNNTNNNNN-----
Hnf1a: -----NNNGTTAN-----
ENSTNIG00000017092: -----NTGATTAN-----
H2.0: -----TTWATNA-----
NEMVEDRAFT_v1g80394: -----NNNATNNNN-----
unpg: -----NNCAATTANN-----
NEMVEDRAFT_v1g164989: -----YTAATTAG-----
Noto: -----NNNNATNNNN-----
MEOX1: -----NSTAATTANN-----
MEOX2: -----NNTAATTANN-----
Nkx1-1: -----NNNNATTANN-----
pdm3: -----CTAATTAN-----
UM04928: -----NNNATNNNNN-----
Hmbox1: -----NNNGTNNN-----
Alx3: -----NNNATTA-----

```



## Stamp Results

09/21/20

```
CG11617:-----WTTTWACA-----
Alx1:-----NNTAATTANN-----
HOXA13:-----GTTTTATTGGN-----
HOXA11:-----NTTTTACGACN-----
HOXA10:-----NTTTTACGACN-----
pb:-----GTMATTAN-----
Barx1:-----NNNNATTANN-----
ATHB-4:-----NNMTGCATRNN-----
ATHB-6:-----NATNATTNN-----
ATHB-7:-----NNATGATTGN-----
Barhl1:-----NNCRTTTANN-----
Rhox11:-----NNNTGTWNNN-----
ventx3.2:-----TAATTAAT-----
Crx:-----NNGATTAN-----
ENSCING00000007395:-----NWNNNNNNN-----
otp:-----NYAATTAN-----
Prrx2:-----NYAATTAN-----
P79681_ACIBE:-----NTAATTAA-----
si_dkey-43p13.5:-----NNNNWWNNNN-----
Lbx2:-----NNNNTTNN-----
CG9876:-----NNYRATTANS-----
NEMVEDRAFT_v1g8907:-----NNNYMATTAN-----
Phox2a:-----NNATTNNN-----
C15:-----YMWTTAAN-----
UNCX:-----NNAATTNN-----
TGIF2LY:-----TGACANNTGTCA--
TGIF2LX:-----TGACAGNTGTCA--
CG34031:-----NNNNNNRN-----
mix11.S:-----NNTAATTAANN-----
NEMVEDRAFT_v1g205636:-----NTAATTAN-----
ARX:-----YTAATTAN-----
dharma:-----GGATNNN-----
Dlx4:-----NNNATTAN-----
ATEG_04171:-----NNNYAATTWN-----
Dlx1:-----NYAATTAN-----
Dlx2:-----NYAATTAN-----
Dlx3:-----NNNNATTAN-----
Hmx1:-----NNNCRNTTNN-----
CDX1:-----NTTTTATGGCN-----
ISL1:-----SCACTTAN-----
ISL2:-----NCACTTAN-----
CDX2:-----NNTTAYRAYN-----
SPU_026099:-----NTAATTAA-----
```

## Stamp Results

09/21/20

|                       |                         |
|-----------------------|-------------------------|
| GSC:                  | -----NGGATTAN-----      |
| ARGFX:                | -----NCTAATTARN-----    |
| NKX2-3:               | -----NNCACTTNNN-----    |
| CAD25284:             | -----TTAATTAN-----      |
| NKX2-5:               | -----YWCTTNN-----       |
| Phyra73700:           | -----NNNNNNNTCAN-----   |
| prd-b:                | -----NTRATTRNN-----     |
| ANIA_00885:           | -----NNTKACANNN-----    |
| CBG00023:             | -----NNNNNATWAN-----    |
| Msx1:                 | -----NNATTAN-----       |
| Msx2:                 | -----NNYAATTA-----      |
| Msx3:                 | NCAATTANNNNSCAATTA----- |
| CBG00029:             | -----TAATTAAT-----      |
| Vax2:                 | -----NNNNATTAN-----     |
| Vax1:                 | -----NNNNATTAN-----     |
| YOX1:                 | -----YNATWWN-----       |
| Hoxd13:               | -----NTTTTATTRS-----    |
| Hoxd10:               | -----NNNNNNNNN-----     |
| Hoxd11:               | -----NNNNNNNNN-----     |
| NKX6-2:               | -----NYAATTAN-----      |
| NKX6-3:               | -----NTCATTAWN-----     |
| Hoxc9:                | -----NTTAATTACN-----    |
| Hoxc8:                | -----NNNNNNNNN-----     |
| BARHL2:               | -----ANCGTTTAN-----     |
| BARHL1:               | -----NCGTTTAN-----      |
| Arx:                  | -----NTAATTNAATTAN----- |
| Hoxc5:                | -----NNATTNN-----       |
| Hoxc4:                | -----NNNNATTAN-----     |
| Hoxc6:                | -----RTAATTAA-----      |
| Shox2:                | -----NYAATTAN-----      |
| vab-7:                | -----MTAATTAA-----      |
| ENSTNIG00000006040:   | -----NNNYNATTANNNN----- |
| lim-4:                | -----NNTAATTAR-----     |
| Evx1:                 | -----NNNNATTAN-----     |
| HOXC4:                | -----NTAATTAA-----      |
| Evx2:                 | -----NNATTANN-----      |
| Isx:                  | -----NNATTNNN-----      |
| NEMVEDRAFT_v1g136480: | -----NNNNNNNNNN-----    |
| Lhx1:                 | -----NNNNNATTA-----     |
| Lhx2:                 | -----NYMATTAN-----      |
| Lhx3:                 | -----NNATTANN-----      |
| Lhx4:                 | -----NTAATTAN-----      |
| Lhx5:                 | -----NNNYAATTA-----     |

## Stamp Results

09/21/20

```

Lhx6: -----NTRATTRN-----
Lhx8: -NTRATTANNNNNTRATTAN-----
GRMZM2G038252: -----NCAATCAN-----
OTX1: -----NGGATTAN-----
OTX2: -----NNTAATCGGATTANN-----
Pknx2: -----TGACAGGTGTCA--
DLX4: -----NCAATTAN-----
DLX5: -----NCAATTAN-----
DLX6: -----NCAATTAN-----
DLX1: -----NYAATTAN-----
DLX2: -----NYAATTAN-----
ATML1: -----NNNANTNANN-----
ceh-37: -----NGGATTAN-----
LMX1A: -----TTAATTAN-----
LMX1B: -----NNNNTAATTAN-----
Gsc: -----NGGATTA-----
achi: -----TGACAN-----
RLT1: -----NANGAANN-----
HOXD12: -----NTTTACGAYN-----
HOXD13: -----GKTTTATTGSS-----
HOXD10: -----NTTTTATKRC-----
HOXD11: -----NTWANNNTTTACGAYN-----
CUP9: -----NTGACACAWN-----
Rax: -----NNAATTANN-----
Scr: -----NYMATTAN-----
VAX2: -----NNATTANN-----
Q4RRY4_TETNG: -----NTRATTRNN-----
Q0ZPQ4_NEMVE: -----CTTCTTAA-----
Q00352_COPCI: -----TGATTGGTT-----
Alx4: -----NTAATYNAATTAN-----
GBX2: -----NYAATTAN-----
GBX1: -----NSYAATTANN-----
kal-1: -----NNNTNNNN-----
HESX1: -----NCYAATTAN-----
AAEL012091: -----NNGATNNNN-----
Pitx2: -----NGGATTAN-----
Pitx3: -----NGGATTAN-----
Pitx1: -----NNGGATTAN-----
scro: -----NCACTYNNN-----
HHEX: -----WTNAATTA-----
PK25011.1: -----NNWTNNNNNN-----
CG32532: -----NTAATNNNATTAN-----
Q0ZPQ8_NEMVE: -----NTGACRNNN-----

```

## Stamp Results

09/21/20

```

NCU09556:-----TATATTAA-----
MIXL1:-----NNYAATTANN-----
CG4328:-----NWTWATTR-----
CNG03450:-----NNWATTAA-----
bcd:-----NNGGATTANN-----
Q0N4M8_NEMVE:-----GTAATTAN-----
NKX3-2:-----NCCACTTANN-----
NKX3-1:-----NCCACTTANN-----
Irx5:-----NNNNACANN-----
CBG20882:-----NYNATNNNN-----
Irx6:-----NNNANAN-----
Irx2:-----NNNACANN-----
HMX1:-----NCAMTTANN-----
HMX3:-----NNCAMTTANN-----
HMX2:-----NCACTTRNC-----
NEMVEDRAFT_v1g81309:-----NNNNATTAN-----
Cdx1:-----NNYNATWNN-----
inv:-----TAATTARW-----
Cdx2:-----NNYNATWWN-----
hbx10:-----NWWATTRN-----
al:-----TAATNNNATTA-----
RHOXF1:-----GGATNATCN-----
ap:-----TAATTARN-----
ind:-----TAATTARNR-----
Sebox:-----NNTTAATTAN-----
Phox2b:-----NNATTNNN-----
XP_003689450.1:-----NNNANMCNNN-----
Lmx1a:-----NNNATNRN-----
Lmx1b:-----NNATNAN-----
tin:-----NCCACTTGAN-----
ANL2:-----NCATTAATTNN-----
MSX1:-----NCAATTAN-----
MSX2:-----NCAATTAN-----
AGAP006642:-----GGATTANN-----
Meox1:-----NNYMATTAN-----
Meox2:-----NTAATTAN-----
RAX2:-----NYAATTAN-----
SHOX:-----NYAATTAN-----
CBG01820:-----NGGATTAN-----
zen2:-----NTMATTAN-----
NEMVEDRAFT_v1g105595:-----NNAATTAN-----
CG11294:-----TAATNNAATTA-----
Nkx1-2:-----NNNATTANN-----

```

```

Barhl2:  -----NNYNNTTAN-----
HGTX:   -----NTMATTAN-----
dve:    -----NNTAATTAGN-----
Q8I9J5_9BILA: -----NRTWATTANN-----
NOTO:   -----NYAATTAN-----
KLLA0_D10043g: -----NNNNNNNNNN-----

```

**Familial Profile:**  
(click for matrix)

---

## Motif Tree

Tree (drawn by [Phylip](#))  
[Click here for Newick-format tree](#) (viewable with [MEGA](#))

**Input Motif**

**Best match in  
JASPAR**

|                        |                                      |
|------------------------|--------------------------------------|
| <a href="#">PHDP</a>   | MA0229.1_inv<br>(E val: 1.9109e-06)  |
| <a href="#">hbn</a>    | MA0229.1_inv<br>(E val: 1.1169e-09)  |
| <a href="#">CG5369</a> | MA0194.1_Lim1<br>(E val: 1.2872e-09) |
| <a href="#">Optix</a>  | MA0229.1_inv<br>(E val: 3.1478e-11)  |

|                |                                         |
|----------------|-----------------------------------------|
| <u>bsh</u>     | MA0229.1_inv<br>(E val: 3.9607e-11)     |
| <u>unc-4</u>   | MA0178.1_CG32105<br>(E val: 1.8305e-08) |
| <u>Arx</u>     | MA0194.1_Lim1<br>(E val: 1.0070e-08)    |
| <u>Uncx</u>    | MA0172.1_CG11294<br>(E val: 3.7957e-09) |
| <u>Alx4</u>    | MA0194.1_Lim1<br>(E val: 6.3149e-08)    |
| <u>CG2808</u>  | MA0188.1_Dr<br>(E val: 1.4849e-08)      |
| <u>CG11294</u> | MA0229.1_inv<br>(E val: 6.6941e-10)     |
| <u>ALX1</u>    | MA0229.1_inv<br>(E val: 1.5023e-08)     |
|                |                                         |

|                |                                         |
|----------------|-----------------------------------------|
| <u>CG32532</u> | MA0232.1_lbl<br>(E val: 5.3536e-07)     |
| <u>al</u>      | MA0172.1_CG11294<br>(E val: 1.2922e-05) |
| <u>PROPI</u>   | MA0188.1_Dr<br>(E val: 2.8776e-09)      |
| <u>Otx1</u>    | MA0234.1_oc<br>(E val: 2.4512e-07)      |
| <u>OTX2</u>    | MA0234.1_oc<br>(E val: 2.2972e-07)      |
| <u>Prrx1</u>   | MA0075.1_Prrx2<br>(E val: 1.7693e-06)   |
| <u>Dlx5</u>    | MA0075.1_Prrx2<br>(E val: 1.2097e-06)   |
| <u>Alx3</u>    | MA0075.1_Prrx2<br>(E val: 8.5973e-07)   |
|                |                                         |

|                             |                                       |
|-----------------------------|---------------------------------------|
| <u>Msx2</u>                 | MA0075.1_Prrx2<br>(E val: 1.9540e-06) |
| <u>Pph13</u>                | MA0075.1_Prrx2<br>(E val: 1.7716e-06) |
| <u>ALX4</u>                 | MA0075.1_Prrx2<br>(E val: 1.8830e-06) |
| <u>PHOX2A</u>               | MA0075.1_Prrx2<br>(E val: 1.9368e-06) |
| <u>NEMVEDRAFT v1g105595</u> | MA0075.1_Prrx2<br>(E val: 2.2012e-06) |
| <u>Rax</u>                  | MA0075.1_Prrx2<br>(E val: 3.8995e-06) |
| <u>Lhx1</u>                 | MA0075.1_Prrx2<br>(E val: 5.0294e-06) |
| <u>LHX1</u>                 | MA0426.1_YHP1<br>(E val: 3.7149e-08)  |
|                             |                                       |



|               |                                      |
|---------------|--------------------------------------|
| <u>Lim1</u>   | MA0426.1_YHP1<br>(E val: 4.6222e-08) |
| <u>PHOX2B</u> | MA0426.1_YHP1<br>(E val: 5.2955e-08) |
| <u>ESX1</u>   | MA0426.1_YHP1<br>(E val: 9.7762e-08) |
| <u>OdsH</u>   | MA0426.1_YHP1<br>(E val: 2.3854e-08) |
| <u>otp</u>    | MA0426.1_YHP1<br>(E val: 2.8789e-08) |
| <u>Dll</u>    | MA0426.1_YHP1<br>(E val: 2.2713e-08) |
| <u>Vsx2</u>   | MA0426.1_YHP1<br>(E val: 2.3819e-08) |
| <u>DLX5</u>   | MA0426.1_YHP1<br>(E val: 2.1206e-08) |
|               |                                      |

|             |                                      |
|-------------|--------------------------------------|
| <u>DLX4</u> | MA0426.1_YHP1<br>(E val: 2.6660e-08) |
| <u>DLX6</u> | MA0426.1_YHP1<br>(E val: 2.4257e-08) |
| <u>DLX1</u> | MA0426.1_YHP1<br>(E val: 3.6604e-08) |
| <u>GBX2</u> | MA0426.1_YHP1<br>(E val: 4.0831e-08) |
| <u>lms</u>  | MA0426.1_YHP1<br>(E val: 3.2934e-08) |
| <u>Rx</u>   | MA0426.1_YHP1<br>(E val: 2.5179e-08) |
| <u>EN1</u>  | MA0426.1_YHP1<br>(E val: 3.7473e-08) |
| <u>Vsx1</u> | MA0426.1_YHP1<br>(E val: 1.3173e-08) |
|             |                                      |

|                            |                                      |
|----------------------------|--------------------------------------|
| <u>MSX1</u>                | MA0426.1_YHP1<br>(E val: 1.1714e-08) |
| <u>MSX2</u>                | MA0426.1_YHP1<br>(E val: 1.1888e-08) |
| <u>en</u>                  | MA0426.1_YHP1<br>(E val: 6.3159e-08) |
| <u>Dlx1</u>                | MA0426.1_YHP1<br>(E val: 7.3537e-08) |
| <u>Dlx2</u>                | MA0426.1_YHP1<br>(E val: 8.3123e-08) |
| <u>Dr</u>                  | MA0426.1_YHP1<br>(E val: 2.9088e-08) |
| <u>SNAPOd2T00006620001</u> | MA0426.1_YHP1<br>(E val: 5.3836e-08) |
| <u>DLX3</u>                | MA0232.1_lbl<br>(E val: 1.1929e-07)  |
|                            |                                      |

|               |                                      |
|---------------|--------------------------------------|
| <u>SHOX2</u>  | MA0232.1_lbl<br>(E val: 1.2365e-07)  |
| <u>Shox2</u>  | MA0232.1_lbl<br>(E val: 9.8309e-08)  |
| <u>TLX2</u>   | MA0232.1_lbl<br>(E val: 8.2750e-08)  |
| <u>DLX2</u>   | MA0232.1_lbl<br>(E val: 1.1128e-07)  |
| <u>RAX2</u>   | MA0232.1_lbl<br>(E val: 1.1674e-07)  |
| <u>PRRX1</u>  | MA0232.1_lbl<br>(E val: 6.1316e-08)  |
| <u>ceh-54</u> | MA0426.1_YHP1<br>(E val: 3.0546e-07) |
| <u>Gbx2</u>   | MA0426.1_YHP1<br>(E val: 2.9462e-07) |
|               |                                      |

|                 |                                      |
|-----------------|--------------------------------------|
| <u>Gbx1</u>     | MA0426.1_YHP1<br>(E val: 3.9716e-07) |
| <u>CG11085</u>  | MA0426.1_YHP1<br>(E val: 2.0173e-08) |
| <u>Hmx</u>      | MA0426.1_YHP1<br>(E val: 4.3245e-08) |
| <u>AAZ08039</u> | MA0426.1_YHP1<br>(E val: 2.2824e-07) |
| <u>GBX1</u>     | MA0232.1_lbl<br>(E val: 4.9552e-07)  |
| <u>CG9876</u>   | MA0426.1_YHP1<br>(E val: 4.0548e-07) |
| <u>unpg</u>     | MA0426.1_YHP1<br>(E val: 2.0776e-07) |
| <u>ceh-58</u>   | MA0232.1_lbl<br>(E val: 4.0935e-07)  |
|                 |                                      |

|                   |                                       |
|-------------------|---------------------------------------|
| <u>Barhl2</u>     | MA0426.1_YHP1<br>(E val: 5.7920e-07)  |
| <u>ceh-19</u>     | MA0426.1_YHP1<br>(E val: 4.4632e-07)  |
| <u>YHP1</u>       | MA0232.1_lbl<br>(E val: 5.2801e-06)   |
| <u>ATEG 04171</u> | MA0232.1_lbl<br>(E val: 4.6903e-06)   |
| <u>NCU03266</u>   | MA0196.1_NK7.1<br>(E val: 1.9654e-08) |
| <u>tup</u>        | MA0248.1_tup<br>(E val: 2.1446e-11)   |
| <u>LHX4</u>       | MA0232.1_lbl<br>(E val: 1.2360e-07)   |
| <u>EMX1</u>       | MA0232.1_lbl<br>(E val: 1.3018e-08)   |
|                   |                                       |

|                |                                     |
|----------------|-------------------------------------|
| <u>lab</u>     | MA0232.1_lbl<br>(E val: 1.0849e-08) |
| <u>CG18599</u> | MA0232.1_lbl<br>(E val: 1.9400e-09) |
| <u>Meox2</u>   | MA0232.1_lbl<br>(E val: 7.1346e-09) |
| <u>ems</u>     | MA0232.1_lbl<br>(E val: 9.6821e-09) |
| <u>EVX1</u>    | MA0232.1_lbl<br>(E val: 1.2369e-08) |
| <u>EVX2</u>    | MA0232.1_lbl<br>(E val: 1.2336e-08) |
| <u>Lim3</u>    | MA0232.1_lbl<br>(E val: 2.1239e-08) |
| <u>Lhx4</u>    | MA0232.1_lbl<br>(E val: 2.0476e-08) |
|                |                                     |

|                             |                                     |
|-----------------------------|-------------------------------------|
| <u>O9GP48_9TURB</u>         | MA0232.1_lbl<br>(E val: 3.8246e-08) |
| <u>Q70LF3_ARTSF</u>         | MA0232.1_lbl<br>(E val: 2.7533e-08) |
| <u>NEMVEDRAFT_v1g205636</u> | MA0232.1_lbl<br>(E val: 3.7288e-08) |
| <u>Esx1</u>                 | MA0232.1_lbl<br>(E val: 3.5689e-08) |
| <u>MNX1</u>                 | MA0232.1_lbl<br>(E val: 2.6559e-08) |
| <u>DRGX</u>                 | MA0232.1_lbl<br>(E val: 3.1653e-08) |
| <u>EN2</u>                  | MA0232.1_lbl<br>(E val: 3.0403e-08) |
| <u>Prrx2</u>                | MA0232.1_lbl<br>(E val: 2.7448e-08) |
|                             |                                     |



|                     |                                     |
|---------------------|-------------------------------------|
| <u>ALX3</u>         | MA0232.1_lbl<br>(E val: 2.1881e-08) |
| <u>SHOX</u>         | MA0232.1_lbl<br>(E val: 2.2701e-08) |
| <u>Awh</u>          | MA0232.1_lbl<br>(E val: 1.6501e-08) |
| <u>Lhx3</u>         | MA0232.1_lbl<br>(E val: 6.3907e-08) |
| <u>uncx</u>         | MA0232.1_lbl<br>(E val: 9.0879e-08) |
| <u>Lhx5</u>         | MA0232.1_lbl<br>(E val: 7.9458e-08) |
| <u>zfhx4</u>        | MA0232.1_lbl<br>(E val: 5.4071e-08) |
| <u>Q4RRY4 TETNG</u> | MA0232.1_lbl<br>(E val: 2.1430e-07) |
|                     |                                     |

|               |                                     |
|---------------|-------------------------------------|
| <u>Hoxa1</u>  | MA0232.1_lbl<br>(E val: 3.8787e-08) |
| <u>HOXA1</u>  | MA0232.1_lbl<br>(E val: 1.4927e-07) |
| <u>prd-b</u>  | MA0232.1_lbl<br>(E val: 7.3149e-07) |
| <u>Lhx6</u>   | MA0232.1_lbl<br>(E val: 1.2291e-06) |
| <u>ceh-23</u> | MA0232.1_lbl<br>(E val: 1.3081e-07) |
| <u>Alx1</u>   | MA0232.1_lbl<br>(E val: 1.4374e-07) |
| <u>MIXL1</u>  | MA0232.1_lbl<br>(E val: 2.4876e-07) |
| <u>En2</u>    | MA0232.1_lbl<br>(E val: 6.0426e-08) |
|               |                                     |

|               |                                     |
|---------------|-------------------------------------|
| <u>slou</u>   | MA0232.1_lbl<br>(E val: 1.4101e-07) |
| <u>GSX1</u>   | MA0232.1_lbl<br>(E val: 6.6879e-08) |
| <u>HOXB2</u>  | MA0232.1_lbl<br>(E val: 1.5599e-08) |
| <u>NOTO</u>   | MA0232.1_lbl<br>(E val: 1.6063e-08) |
| <u>HOXB7</u>  | MA0232.1_lbl<br>(E val: 1.8210e-08) |
| <u>NKX6-2</u> | MA0232.1_lbl<br>(E val: 1.8473e-08) |
| <u>Ubx</u>    | MA0232.1_lbl<br>(E val: 1.5127e-08) |
| <u>PDX1</u>   | MA0232.1_lbl<br>(E val: 1.1612e-08) |
|               |                                     |

|              |                                     |
|--------------|-------------------------------------|
| <u>HOXA2</u> | MA0232.1_lbl<br>(E val: 8.6640e-09) |
| <u>Lhx2</u>  | MA0232.1_lbl<br>(E val: 9.1589e-09) |
| <u>HGTX</u>  | MA0232.1_lbl<br>(E val: 6.2738e-09) |
| <u>HOXB5</u> | MA0232.1_lbl<br>(E val: 5.6550e-08) |
| <u>HOXA7</u> | MA0232.1_lbl<br>(E val: 1.0318e-07) |
| <u>HOXD4</u> | MA0232.1_lbl<br>(E val: 6.8867e-08) |
| <u>Scr</u>   | MA0232.1_lbl<br>(E val: 4.3130e-08) |
| <u>HOXB8</u> | MA0232.1_lbl<br>(E val: 1.3096e-07) |
|              |                                     |

|                     |                                      |
|---------------------|--------------------------------------|
| <u>HOXD8</u>        | MA0232.1_lbl<br>(E val: 2.2035e-07)  |
| <u>HOXB6</u>        | MA0232.1_lbl<br>(E val: 3.1744e-08)  |
| <u>HOXA5</u>        | MA0223.1_exex<br>(E val: 3.9288e-10) |
| <u>Q0N4M8 NEMVE</u> | MA0223.1_exex<br>(E val: 2.3856e-09) |
| <u>HOXA6</u>        | MA0223.1_exex<br>(E val: 8.5000e-08) |
| <u>abd-A</u>        | MA0223.1_exex<br>(E val: 1.9332e-08) |
| <u>HOXA4</u>        | MA0232.1_lbl<br>(E val: 8.1005e-08)  |
| <u>pb</u>           | MA0232.1_lbl<br>(E val: 6.8619e-08)  |
|                     |                                      |

|                           |                                      |
|---------------------------|--------------------------------------|
| <u>HOXB3</u>              | MA0232.1_lbl<br>(E val: 5.6179e-08)  |
| <u>NEMVEDRAFT v1g8907</u> | MA0232.1_lbl<br>(E val: 1.4668e-07)  |
| <u>Hoxd3</u>              | MA0232.1_lbl<br>(E val: 1.0207e-07)  |
| <u>Hoxa2</u>              | MA0232.1_lbl<br>(E val: 3.9527e-08)  |
| <u>MEOX2</u>              | MA0232.1_lbl<br>(E val: 7.0922e-08)  |
| <u>eve</u>                | MA0241.1_ro<br>(E val: 7.8255e-10)   |
| <u>GSX2</u>               | MA0232.1_lbl<br>(E val: 8.5976e-09)  |
| <u>MEOX1</u>              | MA0223.1_exex<br>(E val: 5.9674e-09) |
|                           |                                      |

|              |                                    |
|--------------|------------------------------------|
| <u>VSX2</u>  | MA0241.1_ro<br>(E val: 2.7339e-11) |
| <u>ARX</u>   | MA0241.1_ro<br>(E val: 3.0360e-11) |
| <u>ISX</u>   | MA0241.1_ro<br>(E val: 8.0527e-11) |
| <u>VENTX</u> | MA0241.1_ro<br>(E val: 9.6463e-11) |
| <u>EMX2</u>  | MA0241.1_ro<br>(E val: 2.5200e-11) |
| <u>ro</u>    | MA0241.1_ro<br>(E val: 1.2763e-11) |
| <u>LBX1</u>  | MA0241.1_ro<br>(E val: 4.2517e-10) |
| <u>pdm3</u>  | MA0241.1_ro<br>(E val: 1.8173e-10) |
|              |                                    |

|                     |                                         |
|---------------------|-----------------------------------------|
| <u>lbl</u>          | MA0241.1_ro<br>(E val: 1.9839e-09)      |
| <u>dve</u>          | MA0241.1_ro<br>(E val: 9.7944e-10)      |
| <u>Q9BJW6_9CNID</u> | MA0241.1_ro<br>(E val: 8.0265e-10)      |
| <u>HESX1</u>        | MA0188.1_Dr<br>(E val: 1.7446e-09)      |
| <u>exex</u>         | MA0198.1_OdsH<br>(E val: 1.1913e-08)    |
| <u>pal-1</u>        | MA0448.1_H2.0<br>(E val: 2.2106e-10)    |
| <u>hox12</u>        | MA0174.1_CG42234<br>(E val: 1.3600e-10) |
| <u>HXD12_HETFR</u>  | MA0206.1_abd-A<br>(E val: 9.0750e-11)   |
|                     |                                         |



|                     |                                      |
|---------------------|--------------------------------------|
| <u>ftz</u>          | MA0226.1_hbn<br>(E val: 2.0192e-11)  |
| <u>Hoxc6</u>        | MA0194.1_Lim1<br>(E val: 1.9802e-11) |
| <u>Hoxc9</u>        | MA0240.1_repo<br>(E val: 7.4846e-10) |
| <u>H2.0</u>         | MA0448.1_H2.0<br>(E val: 2.5989e-11) |
| <u>Antp</u>         | MA0166.1_Antp<br>(E val: 1.2763e-11) |
| <u>C15</u>          | MA0170.1_C15<br>(E val: 1.2763e-11)  |
| <u>Q24780 9CNID</u> | MA0194.1_Lim1<br>(E val: 7.3681e-10) |
| <u>Q0N4F9 NEMVE</u> | MA0180.1_Vsx2<br>(E val: 1.1622e-12) |
|                     |                                      |

|                             |                                      |
|-----------------------------|--------------------------------------|
| <u>P79681_ACIBE</u>         | MA0180.1_Vsx2<br>(E val: 6.4537e-13) |
| <u>SPU_026099</u>           | MA0180.1_Vsx2<br>(E val: 8.9306e-13) |
| <u>vab-7</u>                | MA0180.1_Vsx2<br>(E val: 1.7780e-12) |
| <u>ENSTNIG00000004116</u>   | MA0180.1_Vsx2<br>(E val: 5.9242e-13) |
| <u>Smp_158000</u>           | MA0180.1_Vsx2<br>(E val: 4.7229e-13) |
| <u>NEMVEDRAFT_vlg164989</u> | MA0180.1_Vsx2<br>(E val: 7.4326e-12) |
| <u>ARGFX</u>                | MA0180.1_Vsx2<br>(E val: 1.2971e-10) |
| <u>vsx2</u>                 | MA0180.1_Vsx2<br>(E val: 3.4137e-10) |
|                             |                                      |

|                     |                                         |
|---------------------|-----------------------------------------|
| <u>Q24782_9CNID</u> | MA0194.1_Lim1<br>(E val: 1.4038e-11)    |
| <u>CG32105</u>      | MA0236.1_otp<br>(E val: 3.4164e-11)     |
| <u>repo</u>         | MA0240.1_repo<br>(E val: 2.8598e-10)    |
| <u>CNK00090</u>     | MA0240.1_repo<br>(E val: 2.3502e-11)    |
| <u>HOXC4</u>        | MA0240.1_repo<br>(E val: 2.0401e-11)    |
| <u>CAD25284</u>     | MA0194.1_Lim1<br>(E val: 1.5897e-11)    |
| <u>LMX1A</u>        | MA0172.1_CG11294<br>(E val: 1.7100e-11) |
| <u>Tlx2</u>         | MA0194.1_Lim1<br>(E val: 2.7621e-10)    |
|                     |                                         |

|                           |                                         |
|---------------------------|-----------------------------------------|
| <u>ventx3.2</u>           | MA0194.1_Lim1<br>(E val: 1.7841e-11)    |
| <u>CBG00029</u>           | MA0194.1_Lim1<br>(E val: 1.6173e-11)    |
| <u>HHEX</u>               | MA0172.1_CG11294<br>(E val: 2.1773e-10) |
| <u>ENSCING00000016045</u> | MA0180.1_Vsx2<br>(E val: 5.3273e-10)    |
| <u>RAX</u>                | MA0202.1_Rx<br>(E val: 5.1507e-11)      |
| <u>inv</u>                | MA0229.1_inv<br>(E val: 6.5503e-15)     |
| <u>ap</u>                 | MA0209.1_ap<br>(E val: 1.2763e-11)      |
| <u>lim-4</u>              | MA0181.1_Vsx1<br>(E val: 9.2564e-11)    |
|                           |                                         |

|                     |                                         |
|---------------------|-----------------------------------------|
| <u>ind</u>          | MA0228.1_ind<br>(E val: 7.6496e-11)     |
| <u>Sebox</u>        | MA0194.1_Lim1<br>(E val: 2.5830e-10)    |
| <u>mix11.S</u>      | MA0194.1_Lim1<br>(E val: 6.0393e-10)    |
| <u>C4B866 NEMVE</u> | MA0194.1_Lim1<br>(E val: 1.2649e-09)    |
| <u>CAD26261</u>     | MA0178.1_CG32105<br>(E val: 2.6988e-08) |
| <u>LHX9</u>         | MA0232.1_lbl<br>(E val: 2.4650e-07)     |
| <u>POU6F1</u>       | MA0232.1_lbl<br>(E val: 1.9095e-07)     |
| <u>Q86SD7 PODCA</u> | MA0232.1_lbl<br>(E val: 2.5359e-07)     |
|                     |                                         |

|                            |                                      |
|----------------------------|--------------------------------------|
| <u>CBG07641</u>            | MA0232.1_lbl<br>(E val: 1.8462e-07)  |
| <u>ceh-62</u>              | MA0232.1_lbl<br>(E val: 2.4811e-07)  |
| <u>ZFHX2</u>               | MA0232.1_lbl<br>(E val: 2.6731e-07)  |
| <u>btn</u>                 | MA0232.1_lbl<br>(E val: 7.5444e-08)  |
| <u>LMX1B</u>               | MA0232.1_lbl<br>(E val: 2.8185e-07)  |
| <u>SNAPOd2T00006145001</u> | MA0232.1_lbl<br>(E val: 2.6419e-06)  |
| <u>HMX3</u>                | MA0426.1_YHP1<br>(E val: 2.8398e-07) |
| <u>SNAPOd2T00003340001</u> | MA0232.1_lbl<br>(E val: 6.4014e-06)  |
|                            |                                      |

|                           |                                         |
|---------------------------|-----------------------------------------|
| <u>CG4328</u>             | MA0182.1_CG4328<br>(E val: 1.4526e-07)  |
| <u>hbx10</u>              | MA0182.1_CG4328<br>(E val: 1.1851e-05)  |
| <u>Q8I9J5_9BILA</u>       | MA0448.1_H2.0<br>(E val: 3.6600e-05)    |
| <u>Q7M3U4_ACRFO</u>       | MA0075.1_Prrx2<br>(E val: 1.9488e-05)   |
| <u>ENSTNIG00000006040</u> | MA0426.1_YHP1<br>(E val: 8.7845e-07)    |
| <u>CBG04010</u>           | MA0206.1_abd-A<br>(E val: 7.7487e-06)   |
| <u>CNG03450</u>           | MA0444.1_CG34031<br>(E val: 7.7102e-07) |
| <u>HDG11</u>              | MA0151.1_ARID3A<br>(E val: 3.6185e-06)  |
|                           |                                         |

|               |                                       |
|---------------|---------------------------------------|
| <u>ANL2</u>   | MA0206.1_abd-A<br>(E val: 4.3694e-06) |
| <u>ATML1</u>  | MA0186.1_Dfd<br>(E val: 8.4622e-05)   |
| <u>Dfd</u>    | MA0232.1_lbl<br>(E val: 1.7692e-06)   |
| <u>zen</u>    | MA0232.1_lbl<br>(E val: 7.9820e-08)   |
| <u>zen2</u>   | MA0232.1_lbl<br>(E val: 2.1091e-08)   |
| <u>NKX6-3</u> | MA0215.1_btn<br>(E val: 3.0070e-09)   |
| <u>HNF1B</u>  | MA0153.1_HNF1B<br>(E val: 5.5378e-13) |
| <u>HNF1A</u>  | MA0153.1_HNF1B<br>(E val: 6.3727e-14) |
|               |                                       |



|                             |                                      |
|-----------------------------|--------------------------------------|
| <u>ATHB-16</u>              | MA0008.1_HAT5<br>(E val: 1.8398e-09) |
| <u>NANOG</u>                | MA0214.1_bsh<br>(E val: 1.0306e-04)  |
| <u>NEMVEDRAFT_v1g113057</u> | MA0212.1_bcd<br>(E val: 2.6743e-08)  |
| <u>HBX4 ECHGR</u>           | MA0190.1_Gsc<br>(E val: 3.2658e-08)  |
| <u>oc</u>                   | MA0212.1_bcd<br>(E val: 3.8618e-09)  |
| <u>GSC</u>                  | MA0234.1_oc<br>(E val: 3.9560e-09)   |
| <u>Gsc</u>                  | MA0234.1_oc<br>(E val: 9.9606e-10)   |
| <u>Q8VHG7 MOUSE</u>         | MA0201.1_Ptx1<br>(E val: 2.4983e-10) |
|                             |                                      |

|                 |                                     |
|-----------------|-------------------------------------|
| <u>PITX1</u>    | MA0234.1_oc<br>(E val: 3.8797e-09)  |
| <u>CBG01820</u> | MA0212.1_bcd<br>(E val: 3.9289e-09) |
| <u>PITX3</u>    | MA0234.1_oc<br>(E val: 3.7633e-09)  |
| <u>OTX1</u>     | MA0234.1_oc<br>(E val: 3.7603e-09)  |
| <u>Ptx1</u>     | MA0234.1_oc<br>(E val: 5.0663e-09)  |
| <u>Pitx2</u>    | MA0234.1_oc<br>(E val: 4.9980e-09)  |
| <u>Pitx3</u>    | MA0234.1_oc<br>(E val: 6.8909e-09)  |
| <u>PITX2</u>    | MA0234.1_oc<br>(E val: 7.9895e-09)  |
|                 |                                     |

|                         |                                     |
|-------------------------|-------------------------------------|
| <u>DMBX1</u>            | MA0234.1_oc<br>(E val: 8.8704e-09)  |
| <u>ceh-53</u>           | MA0190.1_Gsc<br>(E val: 4.6874e-09) |
| <u>ceh-37</u>           | MA0190.1_Gsc<br>(E val: 4.0372e-09) |
| <u>AGAP006642</u>       | MA0190.1_Gsc<br>(E val: 4.0356e-09) |
| <u>Pitx1</u>            | MA0234.1_oc<br>(E val: 1.8154e-08)  |
| <u>Dobox5 CONSTRUCT</u> | MA0190.1_Gsc<br>(E val: 2.6002e-08) |
| <u>Obox6</u>            | MA0190.1_Gsc<br>(E val: 2.0177e-08) |
| <u>Obox1</u>            | MA0190.1_Gsc<br>(E val: 3.5326e-08) |
|                         |                                     |

|               |                                     |
|---------------|-------------------------------------|
| <u>DPRX</u>   | MA0190.1_Gsc<br>(E val: 2.8082e-08) |
| <u>RHOXF1</u> | MA0234.1_oc<br>(E val: 4.4835e-08)  |
| <u>CRX</u>    | MA0212.1_bcd<br>(E val: 2.6743e-08) |
| <u>bcd</u>    | MA0234.1_oc<br>(E val: 5.4501e-08)  |
| <u>ceh-36</u> | MA0234.1_oc<br>(E val: 2.6099e-05)  |
| <u>Otx2</u>   | MA0234.1_oc<br>(E val: 2.8635e-05)  |
| <u>Crx</u>    | MA0234.1_oc<br>(E val: 2.9955e-05)  |
| <u>Dmbx1</u>  | MA0234.1_oc<br>(E val: 4.4797e-05)  |
|               |                                     |

|                     |                                        |
|---------------------|----------------------------------------|
| <u>dharm</u>        | MA0234.1_oc<br>(E val: 4.8065e-04)     |
| <u>LHX6</u>         | MA0235.1_onecut<br>(E val: 2.8624e-04) |
| <u>Duxbl1</u>       | MA0235.1_onecut<br>(E val: 4.4831e-04) |
| <u>WOX13</u>        | MA0070.1_PBX1<br>(E val: 5.5638e-06)   |
| <u>PBX1</u>         | MA0070.1_PBX1<br>(E val: 1.9530e-07)   |
| <u>Q00354 COPCI</u> | MA0316.1_HAP5<br>(E val: 3.4094e-09)   |
| <u>Q00352 COPCI</u> | MA0060.1_NFYA<br>(E val: 4.3583e-09)   |
| <u>Q68SS9 PLEDJ</u> | MA0315.1_HAP4<br>(E val: 9.4207e-07)   |
|                     |                                        |

|                           |                                        |
|---------------------------|----------------------------------------|
| <u>HAT1</u>               | MA0235.1_onecut<br>(E val: 1.4678e-04) |
| <u>hbx5-2</u>             | MA0235.1_onecut<br>(E val: 9.7419e-08) |
| <u>hbx5-1</u>             | MA0070.1_PBX1<br>(E val: 4.1702e-10)   |
| <u>ATHB-7</u>             | MA0070.1_PBX1<br>(E val: 1.0559e-04)   |
| <u>HAT3</u>               | MA0235.1_onecut<br>(E val: 2.3651e-05) |
| <u>GRMZM2G038252</u>      | MA0426.1_YHP1<br>(E val: 9.8215e-06)   |
| <u>ENSTNIG00000017092</u> | MA0235.1_onecut<br>(E val: 1.9058e-05) |
| <u>SNOG_08903</u>         | MA0235.1_onecut<br>(E val: 1.5205e-10) |
|                           |                                        |

|                             |                                        |
|-----------------------------|----------------------------------------|
| <u>NEMVEDRAFT_v1g101664</u> | MA0070.1_PBX1<br>(E val: 5.5008e-06)   |
| <u>Lhx6_CONSTRUCT</u>       | MA0075.1_Prrx2<br>(E val: 2.2088e-04)  |
| <u>Cphx1</u>                | MA0235.1_onecut<br>(E val: 1.1410e-03) |
| <u>ATHB-6</u>               | MA0110.1_ATHB-5<br>(E val: 6.6140e-05) |
| <u>Q9C1N5_COPSC</u>         | MA0037.1_GATA3<br>(E val: 5.0444e-03)  |
| <u>AAEL012091</u>           | MA0212.1_bcd<br>(E val: 1.3723e-02)    |
| <u>BARX1</u>                | MA0151.1_ARID3A<br>(E val: 1.2246e-06) |
| <u>Msx3</u>                 | MA0192.1_Hmx<br>(E val: 1.0690e-08)    |
|                             |                                        |

|                     |                                       |
|---------------------|---------------------------------------|
| <u>Q0ZPQ4_NEMVE</u> | MA0127.1_PEND<br>(E val: 1.6660e-08)  |
| <u>TLX3</u>         | MA0188.1_Dr<br>(E val: 1.1926e-03)    |
| <u>Lhx8</u>         | MA0198.1_OdsH<br>(E val: 9.5457e-08)  |
| <u>ventx1.1.L</u>   | MA0075.1_Prrx2<br>(E val: 1.2557e-02) |
| <u>Hlx</u>          | MA0075.1_Prrx2<br>(E val: 9.7967e-03) |
| <u>Lmx1b</u>        | MA0075.1_Prrx2<br>(E val: 2.9556e-03) |
| <u>Lmx1a</u>        | MA0075.1_Prrx2<br>(E val: 5.3755e-03) |
| <u>kal-1</u>        | MA0075.1_Prrx2<br>(E val: 6.1057e-03) |
|                     |                                       |



|                             |                                       |
|-----------------------------|---------------------------------------|
| <u>PHO2</u>                 | MA0075.1_Prrx2<br>(E val: 1.2104e-02) |
| <u>ceh-51</u>               | MA0075.1_Prrx2<br>(E val: 4.0765e-02) |
| <u>UM04928</u>              | MA0075.1_Prrx2<br>(E val: 1.3088e-02) |
| <u>LHX2</u>                 | MA0075.1_Prrx2<br>(E val: 8.0794e-03) |
| <u>Q0N4H9 NEMVE</u>         | MA0075.1_Prrx2<br>(E val: 2.6414e-02) |
| <u>NEMVEDRAFT v1g129868</u> | MA0075.1_Prrx2<br>(E val: 5.9220e-03) |
| <u>NEMVEDRAFT v1g136480</u> | MA0094.1_Ubx<br>(E val: 7.7218e-03)   |
| <u>GSC2</u>                 | MA0094.1_Ubx<br>(E val: 2.0696e-03)   |
|                             |                                       |

|                |                                       |
|----------------|---------------------------------------|
| <u>Isl2</u>    | MA0094.1_Ubx<br>(E val: 3.3589e-03)   |
| <u>Obox3</u>   | MA0094.1_Ubx<br>(E val: 1.7438e-03)   |
| <u>Msx1</u>    | MA0094.1_Ubx<br>(E val: 1.2509e-03)   |
| <u>Hoxc5</u>   | MA0094.1_Ubx<br>(E val: 1.3094e-03)   |
| <u>POU5F1B</u> | MA0075.1_Prrx2<br>(E val: 3.0457e-03) |
| <u>Dlx4</u>    | MA0075.1_Prrx2<br>(E val: 2.1990e-03) |
| <u>E5</u>      | MA0075.1_Prrx2<br>(E val: 1.9975e-03) |
| <u>Isx</u>     | MA0094.1_Ubx<br>(E val: 2.0861e-03)   |
|                |                                       |

|                     |                                       |
|---------------------|---------------------------------------|
| <u>Q6WL90 TRICY</u> | MA0075.1_Prrx2<br>(E val: 1.9260e-03) |
| <u>VAX2</u>         | MA0075.1_Prrx2<br>(E val: 2.0276e-03) |
| <u>Pdx1</u>         | MA0094.1_Ubx<br>(E val: 2.5080e-03)   |
| <u>Rhox6</u>        | MA0094.1_Ubx<br>(E val: 2.0443e-03)   |
| <u>Evx2</u>         | MA0075.1_Prrx2<br>(E val: 2.3487e-03) |
| <u>Otp</u>          | MA0075.1_Prrx2<br>(E val: 2.0878e-03) |
| <u>Phox2a</u>       | MA0094.1_Ubx<br>(E val: 2.1722e-03)   |
| <u>Phox2b</u>       | MA0075.1_Prrx2<br>(E val: 2.3015e-03) |
|                     |                                       |

|              |                                       |
|--------------|---------------------------------------|
| <u>Obox5</u> | MA0094.1_Ubx<br>(E val: 2.4391e-03)   |
| <u>Barx2</u> | MA0094.1_Ubx<br>(E val: 3.1310e-03)   |
| <u>Vax1</u>  | MA0075.1_Prrx2<br>(E val: 3.3455e-03) |
| <u>Dlx3</u>  | MA0075.1_Prrx2<br>(E val: 3.2354e-03) |
| <u>barx1</u> | MA0075.1_Prrx2<br>(E val: 3.1848e-03) |
| <u>Vax2</u>  | MA0075.1_Prrx2<br>(E val: 3.3359e-03) |
| <u>Hoxb3</u> | MA0075.1_Prrx2<br>(E val: 3.1781e-03) |
| <u>Hoxa5</u> | MA0094.1_Ubx<br>(E val: 3.3308e-03)   |
|              |                                       |

|               |                                       |
|---------------|---------------------------------------|
| <u>Hoxb4</u>  | MA0094.1_Ubx<br>(E val: 3.3626e-03)   |
| <u>Hoxc4</u>  | MA0094.1_Ubx<br>(E val: 3.5159e-03)   |
| <u>Evx1</u>   | MA0075.1_Prrx2<br>(E val: 3.1475e-03) |
| <u>Hoxa4</u>  | MA0094.1_Ubx<br>(E val: 3.2531e-03)   |
| <u>Gsx2</u>   | MA0075.1_Prrx2<br>(E val: 3.0869e-03) |
| <u>Emx2</u>   | MA0075.1_Prrx2<br>(E val: 3.2531e-03) |
| <u>Nkx1-2</u> | MA0075.1_Prrx2<br>(E val: 3.3875e-03) |
| <u>Nkx6-1</u> | MA0075.1_Prrx2<br>(E val: 3.4714e-03) |
|               |                                       |

|                            |                                       |
|----------------------------|---------------------------------------|
|                            |                                       |
| <u>NEMVEDRAFT_v1g81309</u> | MA0075.1_Prrx2<br>(E val: 3.3645e-03) |
|                            |                                       |
| <u>Bsx</u>                 | MA0075.1_Prrx2<br>(E val: 3.4670e-03) |
|                            |                                       |
| <u>Lbx2</u>                | MA0094.1_Ubx<br>(E val: 5.3979e-03)   |
|                            |                                       |
| <u>ceh-5</u>               | MA0075.1_Prrx2<br>(E val: 3.4502e-03) |
|                            |                                       |
| <u>Hoxb5</u>               | MA0094.1_Ubx<br>(E val: 3.7479e-03)   |
|                            |                                       |
| <u>Nkx6-3</u>              | MA0075.1_Prrx2<br>(E val: 3.8618e-03) |
|                            |                                       |
| <u>Nobox</u>               | MA0094.1_Ubx<br>(E val: 4.8980e-03)   |
|                            |                                       |
| <u>Meox1</u>               | MA0075.1_Prrx2<br>(E val: 4.5297e-03) |
|                            |                                       |

|                 |                                       |
|-----------------|---------------------------------------|
| <u>Nanog</u>    | MA0075.1_Prrx2<br>(E val: 4.5812e-03) |
| <u>CBG20882</u> | MA0094.1_Ubx<br>(E val: 4.1346e-03)   |
| <u>Hoxb8</u>    | MA0094.1_Ubx<br>(E val: 6.4583e-03)   |
| <u>Hoxb6</u>    | MA0094.1_Ubx<br>(E val: 2.5913e-03)   |
| <u>Hoxb7</u>    | MA0094.1_Ubx<br>(E val: 3.4932e-03)   |
| <u>Hoxd8</u>    | MA0094.1_Ubx<br>(E val: 4.7931e-03)   |
| <u>Hoxa7</u>    | MA0094.1_Ubx<br>(E val: 5.6775e-03)   |
| <u>YOX1</u>     | MA0094.1_Ubx<br>(E val: 1.1609e-02)   |
|                 |                                       |

|                 |                                       |
|-----------------|---------------------------------------|
| <u>Hoxa6</u>    | MA0094.1_Ubx<br>(E val: 3.7532e-03)   |
| <u>Hoxc8</u>    | MA0094.1_Ubx<br>(E val: 8.9132e-03)   |
| <u>Barx1</u>    | MA0094.1_Ubx<br>(E val: 4.4172e-03)   |
| <u>Hoxa3</u>    | MA0075.1_Prrx2<br>(E val: 4.2577e-03) |
| <u>Mnx1</u>     | MA0075.1_Prrx2<br>(E val: 4.4611e-03) |
| <u>ZHD7</u>     | MA0075.1_Prrx2<br>(E val: 5.0331e-03) |
| <u>Nkx1-1</u>   | MA0075.1_Prrx2<br>(E val: 4.6337e-03) |
| <u>CBG00023</u> | MA0094.1_Ubx<br>(E val: 5.4028e-03)   |
|                 |                                       |



|                     |                                       |
|---------------------|---------------------------------------|
| <u>Hmx2</u>         | MA0426.1_YHP1<br>(E val: 3.6198e-04)  |
| <u>Hmx1</u>         | MA0426.1_YHP1<br>(E val: 3.2593e-04)  |
| <u>Prop1</u>        | MA0075.1_Prrx2<br>(E val: 1.9940e-03) |
| <u>En1</u>          | MA0075.1_Prrx2<br>(E val: 2.1945e-03) |
| <u>UNCX</u>         | MA0075.1_Prrx2<br>(E val: 1.8805e-03) |
| <u>Noto</u>         | MA0075.1_Prrx2<br>(E val: 6.3461e-03) |
| <u>yox1</u>         | MA0075.1_Prrx2<br>(E val: 7.7965e-03) |
| <u>Q0N4H7 NEMVE</u> | MA0094.1_Ubx<br>(E val: 2.9184e-02)   |
|                     |                                       |

|                            |                                         |
|----------------------------|-----------------------------------------|
| <u>NOBOX</u>               | MA0426.1_YHP1<br>(E val: 3.2827e-02)    |
| <u>CG15696</u>             | MA0426.1_YHP1<br>(E val: 2.0724e-02)    |
| <u>CG34031</u>             | MA0426.1_YHP1<br>(E val: 2.0324e-02)    |
| <u>NEMVEDRAFT_v1g80394</u> | MA0426.1_YHP1<br>(E val: 1.3574e-02)    |
| <u>pha-2</u>               | MA0426.1_YHP1<br>(E val: 4.0154e-02)    |
| <u>Hoxb9</u>               | MA0165.1_Abd-B<br>(E val: 1.0286e-03)   |
| <u>CBG23031</u>            | MA0174.1_CG42234<br>(E val: 8.4823e-04) |
| <u>Hoxc11</u>              | MA0165.1_Abd-B<br>(E val: 2.3036e-03)   |
|                            |                                         |

|               |                                       |
|---------------|---------------------------------------|
| <u>Hoxc13</u> | MA0165.1_Abd-B<br>(E val: 1.2421e-03) |
| <u>Hoxb13</u> | MA0165.1_Abd-B<br>(E val: 1.5614e-03) |
| <u>Hoxa13</u> | MA0165.1_Abd-B<br>(E val: 9.6505e-04) |
| <u>HOXC13</u> | MA0216.1_cad<br>(E val: 1.0465e-08)   |
| <u>HOXA13</u> | MA0216.1_cad<br>(E val: 2.1130e-08)   |
| <u>HOXD13</u> | MA0216.1_cad<br>(E val: 3.3250e-08)   |
| <u>HOXB13</u> | MA0216.1_cad<br>(E val: 1.6334e-08)   |
| <u>Hoxd13</u> | MA0216.1_cad<br>(E val: 3.4315e-10)   |
|               |                                       |

|                |                                       |
|----------------|---------------------------------------|
| <u>Hoxd9</u>   | MA0165.1_Abd-B<br>(E val: 4.1215e-07) |
| <u>HOXC12</u>  | MA0216.1_cad<br>(E val: 4.7854e-09)   |
| <u>hoxd13a</u> | MA0216.1_cad<br>(E val: 8.3883e-11)   |
| <u>cad</u>     | MA0216.1_cad<br>(E val: 2.2162e-08)   |
| <u>HOXD9</u>   | MA0216.1_cad<br>(E val: 6.3975e-10)   |
| <u>HOXD10</u>  | MA0216.1_cad<br>(E val: 5.7397e-10)   |
| <u>CDX1</u>    | MA0216.1_cad<br>(E val: 1.0263e-07)   |
| <u>HOXC10</u>  | MA0216.1_cad<br>(E val: 2.9939e-09)   |
|                |                                       |

|               |                                       |
|---------------|---------------------------------------|
| <u>ceh-90</u> | MA0393.1_STE12<br>(E val: 1.3427e-03) |
| <u>HOXB9</u>  | MA0165.1_Abd-B<br>(E val: 2.2251e-06) |
| <u>Hoxc10</u> | MA0165.1_Abd-B<br>(E val: 2.4823e-08) |
| <u>Abd-B</u>  | MA0165.1_Abd-B<br>(E val: 1.4554e-06) |
| <u>HOXA10</u> | MA0165.1_Abd-B<br>(E val: 7.2371e-06) |
| <u>HOXA11</u> | MA0165.1_Abd-B<br>(E val: 2.0449e-05) |
| <u>Hoxa11</u> | MA0165.1_Abd-B<br>(E val: 6.8791e-06) |
| <u>HOXD11</u> | MA0153.1_HNF1B<br>(E val: 2.3770e-05) |
|               |                                       |

|                         |                                        |
|-------------------------|----------------------------------------|
| <u>HOXC11</u>           | MA0165.1_Abd-B<br>(E val: 6.4582e-06)  |
| <u>HOXD12</u>           | MA0165.1_Abd-B<br>(E val: 1.5126e-05)  |
| <u>HOXA9</u>            | MA0165.1_Abd-B<br>(E val: 4.9453e-07)  |
| <u>CDX2</u>             | MA0165.1_Abd-B<br>(E val: 1.8242e-04)  |
| <u>Hoxc12</u>           | MA0151.1_ARID3A<br>(E val: 3.9486e-02) |
| <u>Hoxd12 CONSTRUCT</u> | MA0151.1_ARID3A<br>(E val: 4.2453e-02) |
| <u>B-H2</u>             | MA0168.1_B-H1<br>(E val: 3.6424e-04)   |
| <u>B-H1</u>             | MA0168.1_B-H1<br>(E val: 3.8028e-04)   |
|                         |                                        |

|                             |                                         |
|-----------------------------|-----------------------------------------|
| <u>BARHL1</u>               | MA0168.1_B-H1<br>(E val: 5.0670e-05)    |
| <u>Barhl1</u>               | MA0168.1_B-H1<br>(E val: 2.9661e-04)    |
| <u>Q0N4H2 NEMVE</u>         | MA0188.1_Dr<br>(E val: 5.7239e-10)      |
| <u>NEMVEDRAFT v1g114268</u> | MA0188.1_Dr<br>(E val: 6.9261e-05)      |
| <u>NK7.1</u>                | MA0054.1_myb.Ph3<br>(E val: 5.3691e-06) |
| <u>BARHL2</u>               | MA0054.1_myb.Ph3<br>(E val: 6.5933e-07) |
| <u>Hoxa10</u>               | MA0307.1_GLN3<br>(E val: 8.7847e-03)    |
| <u>Hoxa9</u>                | MA0307.1_GLN3<br>(E val: 6.1601e-03)    |
|                             |                                         |

|               |                                      |
|---------------|--------------------------------------|
| <u>Hoxd10</u> | MA0307.1_GLN3<br>(E val: 4.1907e-03) |
| <u>Hoxd11</u> | MA0307.1_GLN3<br>(E val: 1.4126e-02) |
| <u>Cdx2</u>   | MA0307.1_GLN3<br>(E val: 8.2090e-03) |
| <u>Cdx1</u>   | MA0307.1_GLN3<br>(E val: 7.8786e-03) |
| <u>BSX</u>    | MA0217.1_caup<br>(E val: 4.8362e-03) |
| <u>PRRX2</u>  | MA0186.1_Dfd<br>(E val: 2.6340e-03)  |
| <u>HMBOX1</u> | MA0231.1_lbe<br>(E val: 4.3822e-07)  |
| <u>lbe</u>    | MA0186.1_Dfd<br>(E val: 4.2043e-04)  |
|               |                                      |



|                           |                                      |
|---------------------------|--------------------------------------|
| <u>LBX2</u>               | MA0186.1_Dfd<br>(E val: 5.8346e-08)  |
| <u>Hnf1b</u>              | MA0217.1_caup<br>(E val: 4.2044e-03) |
| <u>Hnf1a</u>              | MA0217.1_caup<br>(E val: 2.6865e-03) |
| <u>ceh-57</u>             | MA0217.1_caup<br>(E val: 6.2734e-03) |
| <u>Hmbox1</u>             | MA0231.1_lbe<br>(E val: 9.7179e-02)  |
| <u>MTR_2g038000</u>       | MA0132.1_Pdx1<br>(E val: 2.8654e-02) |
| <u>ceh-24</u>             | MA0211.1_bap<br>(E val: 5.8321e-02)  |
| <u>ENSCING00000007395</u> | MA0211.1_bap<br>(E val: 3.0174e-02)  |
|                           |                                      |

|               |                                        |
|---------------|----------------------------------------|
| <u>ceh-22</u> | MA0211.1_bap<br>(E val: 4.4240e-08)    |
| <u>vnd</u>    | MA0253.1_vnd<br>(E val: 1.1102e-16)    |
| <u>tin</u>    | MA0264.1_ceh-22<br>(E val: 3.1586e-09) |
| <u>bap</u>    | MA0211.1_bap<br>(E val: 2.1113e-06)    |
| <u>ISL1</u>   | MA0211.1_bap<br>(E val: 7.7296e-07)    |
| <u>ISL2</u>   | MA0211.1_bap<br>(E val: 6.2608e-07)    |
| <u>HMX1</u>   | MA0063.1_Nkx2-5<br>(E val: 2.2710e-06) |
| <u>HMX2</u>   | MA0211.1_bap<br>(E val: 1.1516e-08)    |
|               |                                        |

|               |                                     |
|---------------|-------------------------------------|
|               |                                     |
| <u>NKX3-2</u> | MA0211.1_bap<br>(E val: 2.0976e-06) |
|               |                                     |
| <u>NKX3-1</u> | MA0211.1_bap<br>(E val: 2.0256e-06) |
|               |                                     |
| <u>Nkx2-6</u> | MA0211.1_bap<br>(E val: 7.4956e-04) |
|               |                                     |
| <u>NKX2-3</u> | MA0211.1_bap<br>(E val: 1.0660e-03) |
|               |                                     |
| <u>Nkx2-9</u> | MA0211.1_bap<br>(E val: 1.9645e-03) |
|               |                                     |
| <u>Nkx2-3</u> | MA0211.1_bap<br>(E val: 9.1394e-04) |
|               |                                     |
| <u>Nkx2-1</u> | MA0211.1_bap<br>(E val: 9.7504e-04) |
|               |                                     |
| <u>NKX2-5</u> | MA0211.1_bap<br>(E val: 7.6109e-05) |
|               |                                     |

|                     |                                        |
|---------------------|----------------------------------------|
| <u>NKX2-8</u>       | MA0211.1_bap<br>(E val: 2.4048e-03)    |
| <u>Nkx2-2</u>       | MA0211.1_bap<br>(E val: 2.2528e-03)    |
| <u>Nkx3-2</u>       | MA0211.1_bap<br>(E val: 6.6546e-04)    |
| <u>scro</u>         | MA0211.1_bap<br>(E val: 1.4217e-03)    |
| <u>Nkx2-5</u>       | MA0211.1_bap<br>(E val: 1.5526e-03)    |
| <u>Nkx2-4</u>       | MA0211.1_bap<br>(E val: 2.2018e-03)    |
| <u>Nkx3-1</u>       | MA0211.1_bap<br>(E val: 8.3180e-04)    |
| <u>Q70HR3_PLEPI</u> | MA0124.1_NKX3-1<br>(E val: 1.7532e-06) |
|                     |                                        |

|                       |                                       |
|-----------------------|---------------------------------------|
| <u>Six6</u>           | MA0246.1_so<br>(E val: 1.1002e-02)    |
| <u>six3</u>           | MA0246.1_so<br>(E val: 5.1282e-02)    |
| <u>XP_003689450.1</u> | MA0036.1_GATA2<br>(E val: 5.8039e-02) |
| <u>SIX6</u>           | MA0199.1_Optix<br>(E val: 1.5619e-05) |
| <u>SIX3</u>           | MA0246.1_so<br>(E val: 4.5416e-07)    |
| <u>Six3</u>           | MA0199.1_Optix<br>(E val: 3.4735e-03) |
| <u>PRH_PETCR</u>      | MA0345.1_NHP6A<br>(E val: 4.6352e-09) |
| <u>NCU09556</u>       | MA0379.1_SIG1<br>(E val: 2.9552e-06)  |
|                       |                                       |

|                            |                                      |
|----------------------------|--------------------------------------|
| <u>hbx2</u>                | MA0379.1_SIG1<br>(E val: 6.3617e-06) |
| <u>KLLA0 D10043g</u>       | MA0379.1_SIG1<br>(E val: 8.4022e-03) |
| <u>NEMVEDRAFT v1g81436</u> | MA0216.1_cad<br>(E val: 9.7454e-02)  |
| <u>Pknox1</u>              | MA0227.1_hth<br>(E val: 7.0473e-03)  |
| <u>unc-62</u>              | MA0207.1_achi<br>(E val: 1.5344e-02) |
| <u>ATEG 00670</u>          | MA0227.1_hth<br>(E val: 3.4042e-02)  |
| <u>IRX2</u>                | MA0207.1_achi<br>(E val: 6.9992e-04) |
| <u>vis</u>                 | MA0252.1_vis<br>(E val: 8.8622e-07)  |
|                            |                                      |

|              |                                      |
|--------------|--------------------------------------|
| <u>achi</u>  | MA0252.1_vis<br>(E val: 8.7480e-07)  |
| <u>Meis2</u> | MA0252.1_vis<br>(E val: 6.4391e-06)  |
| <u>MEIS1</u> | MA0252.1_vis<br>(E val: 6.6419e-06)  |
| <u>Meis3</u> | MA0227.1_hth<br>(E val: 6.6077e-06)  |
| <u>hbx9</u>  | MA0288.1_CUP9<br>(E val: 9.3246e-06) |
| <u>CUP9</u>  | MA0288.1_CUP9<br>(E val: 3.7091e-11) |
| <u>exd</u>   | MA0222.1_exd<br>(E val: 2.5740e-10)  |
| <u>Meis1</u> | MA0252.1_vis<br>(E val: 4.1357e-05)  |
|              |                                      |

|                      |                                      |
|----------------------|--------------------------------------|
| <u>Tgif2</u>         | MA0227.1_hth<br>(E val: 6.9961e-05)  |
| <u>Tgif1</u>         | MA0227.1_hth<br>(E val: 6.8698e-05)  |
| <u>hbx4</u>          | MA0227.1_hth<br>(E val: 1.0419e-04)  |
| <u>CAGL0H02959g</u>  | MA0227.1_hth<br>(E val: 1.1990e-04)  |
| <u>ANIA_00885</u>    | MA0207.1_achi<br>(E val: 1.9445e-04) |
| <u>GRMZM2G087741</u> | MA0227.1_hth<br>(E val: 1.3141e-06)  |
| <u>GRMZM2G135447</u> | MA0227.1_hth<br>(E val: 5.9773e-09)  |
| <u>CBG24578</u>      | MA0207.1_achi<br>(E val: 1.4139e-07) |
|                      |                                      |



|                |                                      |
|----------------|--------------------------------------|
| <u>TGIF2</u>   | MA0227.1_hth<br>(E val: 3.1704e-07)  |
| <u>TGIF1</u>   | MA0207.1_achi<br>(E val: 1.8587e-07) |
| <u>MEIS2</u>   | MA0207.1_achi<br>(E val: 3.0941e-07) |
| <u>PKNOX1</u>  | MA0227.1_hth<br>(E val: 5.8002e-07)  |
| <u>PKNOX2</u>  | MA0227.1_hth<br>(E val: 5.7190e-07)  |
| <u>TGIF2LY</u> | MA0227.1_hth<br>(E val: 3.0965e-07)  |
| <u>TGIF2LX</u> | MA0227.1_hth<br>(E val: 2.5463e-07)  |
| <u>Pknox2</u>  | MA0207.1_achi<br>(E val: 1.0777e-07) |
|                |                                      |

|                   |                                           |
|-------------------|-------------------------------------------|
| <u>IRX5</u>       | MA0328.1_MATALPHA2<br>(E val: 3.9553e-05) |
| <u>caup</u>       | MA0217.1_caup<br>(E val: 1.6159e-06)      |
| <u>CG11617</u>    | MA0173.1_CG11617<br>(E val: 1.4526e-07)   |
| <u>Rhox8</u>      | MA0392.1_STB5<br>(E val: 2.3740e-05)      |
| <u>ara</u>        | MA0210.1_ara<br>(E val: 1.6159e-06)       |
| <u>AGAP009986</u> | MA0210.1_ara<br>(E val: 2.8411e-02)       |
| <u>Irx5</u>       | MA0210.1_ara<br>(E val: 1.3053e-02)       |
| <u>Irx6</u>       | MA0210.1_ara<br>(E val: 5.7942e-03)       |
|                   |                                           |

|                            |                                           |
|----------------------------|-------------------------------------------|
| <u>Irx2</u>                | MA0210.1_ara<br>(E val: 1.6628e-02)       |
| <u>Rhox11</u>              | MA0210.1_ara<br>(E val: 2.0801e-02)       |
| <u>SNAPOd2T00005194001</u> | MA0328.1_MATALPHA2<br>(E val: 1.7656e-04) |
| <u>ATHB-4</u>              | MA0254.1_vvl<br>(E val: 8.1236e-04)       |
| <u>PK24181.1</u>           | MA0227.1_hth<br>(E val: 4.3791e-02)       |
| <u>pbx4</u>                | MA0235.1_onecut<br>(E val: 3.6885e-04)    |
| <u>TVAG 451170</u>         | MA0246.1_so<br>(E val: 1.2975e-03)        |
| <u>TOS8</u>                | MA0018.2_CREB1<br>(E val: 8.6372e-07)     |
|                            |                                           |

|                     |                                             |
|---------------------|---------------------------------------------|
| <u>PBX4</u>         | MA0204.1_Six4<br>(E val: 3.4604e-02)        |
| <u>CBG10835</u>     | MA0199.1_Optix<br>(E val: 1.5682e-02)       |
| <u>Phyra73700</u>   | MA0199.1_Optix<br>(E val: 1.5829e-02)       |
| <u>KNAT6</u>        | MA0207.1_achi<br>(E val: 1.6623e-02)        |
| <u>Q0ZPQ8 NEMVE</u> | MA0207.1_achi<br>(E val: 1.1053e-02)        |
| <u>RLT1</u>         | MA0127.1_PEND<br>(E val: 3.5933e-02)        |
| <u>PK25011.1</u>    | MA0089.1_NFE2L1_MafG<br>(E val: 1.5545e-01) |
| <u>ATHB-12</u>      | MA0089.1_NFE2L1_MafG<br>(E val: 2.0267e-01) |
|                     |                                             |

si\_dkey-43p13.5

MA0210.1\_ara  
(E val: 7.5942e-02)

---

## Motif Similarity Matches

### PHDP

*forward**reverse compliment*

| <i>Name</i>  | <i>E value</i> | <i>Alignment</i>               | <i>Motif</i> |
|--------------|----------------|--------------------------------|--------------|
| MA0229.1_inv | 1.9109e-06     | NTAATNNNATTAN<br>----WYTAATTA- |              |

---

### hbn

*forward**reverse compliment*

| <i>Name</i>  | <i>E value</i> | <i>Alignment</i>               | <i>Motif</i> |
|--------------|----------------|--------------------------------|--------------|
| MA0229.1_inv | 1.1169e-09     | NTAATTTAATTAN<br>----WYTAATTA- |              |

---

### CG5369

*forward*

*reverse compliment*

| <i>Name</i> | <i>E value</i> | <i>Alignment</i> | <i>Motif</i> |
|-------------|----------------|------------------|--------------|
|-------------|----------------|------------------|--------------|

|               |            |                            |  |
|---------------|------------|----------------------------|--|
| MA0194.1_Lim1 | 1.2872e-09 | TAATTNNATTA<br>TAATTAA---- |  |
|---------------|------------|----------------------------|--|

---

**Optix***forward**reverse compliment*

| <i>Name</i> | <i>E value</i> | <i>Alignment</i> | <i>Motif</i> |
|-------------|----------------|------------------|--------------|
|-------------|----------------|------------------|--------------|

|              |            |                            |  |
|--------------|------------|----------------------------|--|
| MA0229.1_inv | 3.1478e-11 | TAATTARATTA<br>TAATTARW--- |  |
|--------------|------------|----------------------------|--|

---

**bsh***forward**reverse compliment*

| <i>Name</i> | <i>E value</i> | <i>Alignment</i> | <i>Motif</i> |
|-------------|----------------|------------------|--------------|
|-------------|----------------|------------------|--------------|

|              |            |                            |  |
|--------------|------------|----------------------------|--|
| MA0229.1_inv | 3.9607e-11 | TAATTARATTA<br>TAATTARW--- |  |
|--------------|------------|----------------------------|--|

---

**unc-4***forward**reverse compliment*

| <i>Name</i>      | <i>E value</i> | <i>Alignment</i>           | <i>Motif</i> |
|------------------|----------------|----------------------------|--------------|
| MA0178.1_CG32105 | 1.8305e-08     | TAATTNAATTA<br>TAATTAA---- |              |

---

**Arx**

|               |                | <i>forward</i>                 | <i>reverse compliment</i> |              |  |
|---------------|----------------|--------------------------------|---------------------------|--------------|--|
| <i>Name</i>   | <i>E value</i> | <i>Alignment</i>               |                           | <i>Motif</i> |  |
| MA0194.1_Lim1 | 1.0070e-08     | NTAATTNAATTAN<br>-TAATTAA----- |                           |              |  |

---

**Uncx**

|                  |                | <i>forward</i>                 | <i>reverse compliment</i> |              |  |
|------------------|----------------|--------------------------------|---------------------------|--------------|--|
| <i>Name</i>      | <i>E value</i> | <i>Alignment</i>               |                           | <i>Motif</i> |  |
| MA0172.1_CG11294 | 3.7957e-09     | NTAATTNRATTAN<br>-TAATTAA----- |                           |              |  |

---

**Alx4**

| <i>forward</i> | <i>reverse compliment</i> |
|----------------|---------------------------|
|----------------|---------------------------|

| <i>Name</i>   | <i>E value</i> | <i>Alignment</i>               | <i>Motif</i> |
|---------------|----------------|--------------------------------|--------------|
| MA0194.1_Lim1 | 6.3149e-08     | NTAATYNAATTAN<br>-TAATTAA----- |              |

---

**CG2808**

*forward*      *reverse compliment*

| <i>Name</i> | <i>E value</i> | <i>Alignment</i>           | <i>Motif</i> |
|-------------|----------------|----------------------------|--------------|
| MA0188.1_Dr | 1.4849e-08     | TAATTNSATTA<br>TAATTGG---- |              |

---

**CG11294**

*forward*      *reverse compliment*

| <i>Name</i>  | <i>E value</i> | <i>Alignment</i>           | <i>Motif</i> |
|--------------|----------------|----------------------------|--------------|
| MA0229.1_inv | 6.6941e-10     | TAATNNAATTA<br>---WYTAATTA |              |

---

**ALX1**

*forward*      *reverse compliment*

| <i>Name</i> | <i>E value</i> | <i>Alignment</i> | <i>Motif</i> |
|-------------|----------------|------------------|--------------|
|-------------|----------------|------------------|--------------|



MA0229.1\_inv 1.5023e-08

NTAAYNYAATTAN  
----WYTAATTA-

---

**CG32532***forward**reverse compliment**Name**E value**Alignment**Motif*

MA0232.1\_lbl

5.3536e-07

NTAATNNNATTAN  
-----TMATTA-

---

**al***forward**reverse compliment**Name**E value**Alignment**Motif*

MA0172.1\_CG11294 1.2922e-05

TAATNNNATTA  
TAATTAA----

---

**PROP1***forward**reverse compliment**Name**E value**Alignment**Motif*

MA0188.1\_Dr 2.8776e-09

NAAYNNAATTA  
-----CCAATTA

---

**Otx1***forward**reverse compliment**Name**E value**Alignment**Motif*

MA0234.1\_oc

2.4512e-07

NNTAATCCGATTANN  
--TAATCC-----

---

**OTX2***forward**reverse compliment**Name**E value**Alignment**Motif*

MA0234.1\_oc

2.2972e-07

NNTAATCGGATTANN  
-----GGATTA--

---

**Prrx1***forward**reverse compliment**Name**E value**Alignment**Motif*

MA0075.1\_Prrx2 1.7693e-06

TAATTNNN  
TAATT---

---

**Dlx5***forward**reverse compliment**Name**E value**Alignment**Motif*

MA0075.1\_Prrx2 1.2097e-06

WAATNNN  
TAATT--

---

**Alx3***forward**reverse compliment**Name**E value**Alignment**Motif*

MA0075.1\_Prrx2 8.5973e-07

TAATNNN  
TAATT--

---

**Msx2***forward**reverse compliment**Name**E value**Alignment**Motif*

MA0075.1\_Prrx2 1.9540e-06

TAATTRNN  
TAATT---

---

**Pph13***forward**reverse compliment**Name**E value**Alignment**Motif*

MA0075.1\_Prrx2 1.7716e-06

NTAATTRN  
-TAATT--

---

**ALX4***forward**reverse compliment**Name**E value**Alignment**Motif*

MA0075.1\_Prrx2 1.8830e-06

NTAATTRN  
-TAATT--

---

**PHOX2A***forward**reverse compliment**Name**E value**Alignment**Motif*

MA0075.1\_Prrx2 1.9368e-06

NTAATTNN  
-TAATT--

---

**NEMVEDRAFT\_v1g105595***forward**reverse compliment**Name**E value**Alignment**Motif*

MA0075.1\_Prrx2 2.2012e-06

NTAATTNN  
-TAATT--

---

**Rax***forward**reverse compliment**Name**E value**Alignment**Motif*

MA0075.1\_Prrx2 3.8995e-06

NNTAATTNN  
--TAATT--

---

**Lhx1***forward**reverse compliment**Name**E value**Alignment**Motif*

MA0075.1\_Prrx2 5.0294e-06

TAATNNNNN  
TAATT----

---

**LHX1**

| <i>forward</i> |                | <i>reverse compliment</i> |              |
|----------------|----------------|---------------------------|--------------|
| <i>Name</i>    | <i>E value</i> | <i>Alignment</i>          | <i>Motif</i> |
| MA0426.1_YHP1  | 3.7149e-08     | NYNATTAN<br>-CAATTA-      |              |

---

**Lim1**

| <i>forward</i> |                | <i>reverse compliment</i> |              |
|----------------|----------------|---------------------------|--------------|
| <i>Name</i>    | <i>E value</i> | <i>Alignment</i>          | <i>Motif</i> |
| MA0426.1_YHP1  | 4.6222e-08     | NYAATTAN<br>-CAATTA-      |              |

---

**PHOX2B**

| <i>forward</i> |                | <i>reverse compliment</i> |              |
|----------------|----------------|---------------------------|--------------|
| <i>Name</i>    | <i>E value</i> | <i>Alignment</i>          | <i>Motif</i> |

MA0426.1\_YHP1 5.2955e-08

NYAATTAN  
-CAATTA-

---

**ESX1***forward**reverse compliment**Name**E value**Alignment**Motif*

MA0426.1\_YHP1 9.7762e-08

NYAATTAN  
-CAATTA-

---

**OdsH***forward**reverse compliment**Name**E value**Alignment**Motif*

MA0426.1\_YHP1 2.3854e-08

NYAATTAN  
-CAATTA-

---

**otp***forward**reverse compliment**Name**E value**Alignment**Motif*

MA0426.1\_YHP1 2.8789e-08

NYAATTAN  
-CAATTA-

---

**Dll***forward**reverse compliment**Name**E value**Alignment**Motif*

MA0426.1\_YHP1 2.2713e-08

NYAATTAN  
-CAATTA-

---

**Vsx2***forward**reverse compliment**Name**E value**Alignment**Motif*

MA0426.1\_YHP1 2.3819e-08

NYAATTAN  
-CAATTA-

---

**DLX5***forward**reverse compliment**Name**E value**Alignment**Motif*



MA0426.1\_YHP1 2.1206e-08

NTAATTGN  
-TAATTG-

---

**DLX4***forward**reverse compliment**Name**E value**Alignment**Motif*

MA0426.1\_YHP1 2.6660e-08

NCAATTAN  
-CAATTA-

---

**DLX6***forward**reverse compliment**Name**E value**Alignment**Motif*

MA0426.1\_YHP1 2.4257e-08

NCAATTAN  
-CAATTA-

---

**DLX1***forward**reverse compliment**Name**E value**Alignment**Motif*

MA0426.1\_YHP1 3.6604e-08

NYAATTAN  
-CAATTA-

---

**GBX2**

| <i>forward</i> |                | <i>reverse compliment</i> |              |
|----------------|----------------|---------------------------|--------------|
| <i>Name</i>    | <i>E value</i> | <i>Alignment</i>          | <i>Motif</i> |
| MA0426.1_YHP1  | 4.0831e-08     | NTAATTRN<br>-TAATTG-      |              |

---

**lms**

| <i>forward</i> |                | <i>reverse compliment</i> |              |
|----------------|----------------|---------------------------|--------------|
| <i>Name</i>    | <i>E value</i> | <i>Alignment</i>          | <i>Motif</i> |
| MA0426.1_YHP1  | 3.2934e-08     | NTAATTRN<br>-TAATTG-      |              |

---

**Rx**

| <i>forward</i> |                | <i>reverse compliment</i> |              |
|----------------|----------------|---------------------------|--------------|
| <i>Name</i>    | <i>E value</i> | <i>Alignment</i>          | <i>Motif</i> |

MA0426.1\_YHP1 2.5179e-08

NYAATTAN  
-CAATTA-

---

**EN1***forward**reverse compliment**Name**E value**Alignment**Motif*

MA0426.1\_YHP1 3.7473e-08

NYAATTAN  
-CAATTA-

---

**Vsx1***forward**reverse compliment**Name**E value**Alignment**Motif*

MA0426.1\_YHP1 1.3173e-08

NCAATTAN  
-CAATTA-

---

**MSX1***forward**reverse compliment**Name**E value**Alignment**Motif*

MA0426.1\_YHP1 1.1714e-08

NCAATTAN  
-CAATTA-

---

**MSX2***forward**reverse compliment**Name**E value**Alignment**Motif*

MA0426.1\_YHP1 1.1888e-08

NCAATTAN  
-CAATTA-

---

**en***forward**reverse compliment**Name**E value**Alignment**Motif*

MA0426.1\_YHP1 6.3159e-08

NTAATTRN  
-TAATTG-

---

**Dlx1***forward**reverse compliment**Name**E value**Alignment**Motif*

MA0426.1\_YHP1 7.3537e-08

NYAATTAN  
-CAATTA-

---

**Dlx2***forward**reverse compliment**Name**E value**Alignment**Motif*

MA0426.1\_YHP1 8.3123e-08

NYAATTAN  
-CAATTA-

---

**Dr***forward**reverse compliment**Name**E value**Alignment**Motif*

MA0426.1\_YHP1 2.9088e-08

NNYAATTA  
--CAATTA

---

**SNAPOd2T00006620001***forward**reverse compliment**Name**E value**Alignment**Motif*

MA0426.1\_YHP1 5.3836e-08

NTAATTRN  
-TAATTG-

---

**DLX3**

| <i>forward</i> |                | <i>reverse compliment</i> |              |
|----------------|----------------|---------------------------|--------------|
| <i>Name</i>    | <i>E value</i> | <i>Alignment</i>          | <i>Motif</i> |
| MA0232.1_lbl   | 1.1929e-07     | NYAATTAN<br>-TMATTA-      |              |

---

**SHOX2**

| <i>forward</i> |                | <i>reverse compliment</i> |              |
|----------------|----------------|---------------------------|--------------|
| <i>Name</i>    | <i>E value</i> | <i>Alignment</i>          | <i>Motif</i> |
| MA0232.1_lbl   | 1.2365e-07     | NYAATTAN<br>-TMATTA-      |              |

---

**Shox2**

| <i>forward</i> |                | <i>reverse compliment</i> |              |
|----------------|----------------|---------------------------|--------------|
| <i>Name</i>    | <i>E value</i> | <i>Alignment</i>          | <i>Motif</i> |
| MA0232.1_lbl   | 9.8309e-08     | NYAATTAN<br>-TMATTA-      |              |

---

**TLX2**

| <i>forward</i> |                | <i>reverse compliment</i> |              |
|----------------|----------------|---------------------------|--------------|
| <i>Name</i>    | <i>E value</i> | <i>Alignment</i>          | <i>Motif</i> |
| MA0232.1_lbl   | 8.2750e-08     | NYAATTAN<br>-TMATTA-      |              |

---

**DLX2**

| <i>forward</i> |                | <i>reverse compliment</i> |              |
|----------------|----------------|---------------------------|--------------|
| <i>Name</i>    | <i>E value</i> | <i>Alignment</i>          | <i>Motif</i> |
| MA0232.1_lbl   | 1.1128e-07     | NYAATTAN<br>-TMATTA-      |              |

---

**RAX2**

| <i>forward</i> |                | <i>reverse compliment</i> |              |
|----------------|----------------|---------------------------|--------------|
| <i>Name</i>    | <i>E value</i> | <i>Alignment</i>          | <i>Motif</i> |
| MA0232.1_lbl   | 1.1674e-07     | NTAATTRN<br>-TAATKA-      |              |

---

**PRRX1**

| <i>forward</i> |                | <i>reverse compliment</i> |              |
|----------------|----------------|---------------------------|--------------|
| <i>Name</i>    | <i>E value</i> | <i>Alignment</i>          | <i>Motif</i> |
| MA0232.1_lbl   | 6.1316e-08     | NTAATTRN<br>-TAATKA-      |              |

---

**ceh-54**

| <i>forward</i> |                | <i>reverse compliment</i> |              |
|----------------|----------------|---------------------------|--------------|
| <i>Name</i>    | <i>E value</i> | <i>Alignment</i>          | <i>Motif</i> |
| MA0426.1_YHP1  | 3.0546e-07     | NNYAATTAN<br>--CAATTA-    |              |

---

**Gbx2**

| <i>forward</i> |                | <i>reverse compliment</i> |              |
|----------------|----------------|---------------------------|--------------|
| <i>Name</i>    | <i>E value</i> | <i>Alignment</i>          | <i>Motif</i> |



MA0426.1\_YHP1 2.9462e-07

NNYAATTANN  
--CAATTA--

---

**Gbx1***forward**reverse compliment**Name**E value**Alignment**Motif*

MA0426.1\_YHP1 3.9716e-07

NNYAATTANN  
--CAATTA--

---

**CG11085***forward**reverse compliment**Name**E value**Alignment**Motif*

MA0426.1\_YHP1 2.0173e-08

NCRATTAN  
-CAATTA-

---

**Hmx***forward**reverse compliment**Name**E value**Alignment**Motif*

MA0426.1\_YHP1 4.3245e-08

NTAAKTGN  
-TAATTG-

---

**AAZ08039***forward**reverse compliment*

| <i>Name</i> | <i>E value</i> | <i>Alignment</i> | <i>Motif</i> |
|-------------|----------------|------------------|--------------|
|-------------|----------------|------------------|--------------|

MA0426.1\_YHP1 2.2824e-07

NNTAATTRNN  
--TAATTG--

---

**GBX1***forward**reverse compliment*

| <i>Name</i> | <i>E value</i> | <i>Alignment</i> | <i>Motif</i> |
|-------------|----------------|------------------|--------------|
|-------------|----------------|------------------|--------------|

MA0232.1\_lbl 4.9552e-07

NSYAATTANN  
--TMATTA--

---

**CG9876***forward**reverse compliment*

| <i>Name</i> | <i>E value</i> | <i>Alignment</i> | <i>Motif</i> |
|-------------|----------------|------------------|--------------|
|-------------|----------------|------------------|--------------|

MA0426.1\_YHP1 4.0548e-07

NNYRATTANS  
--CAATTA--

---

**unpg***forward**reverse compliment**Name**E value**Alignment**Motif*

MA0426.1\_YHP1 2.0776e-07

NNCAATTANN  
--CAATTA--

---

**ceh-58***forward**reverse compliment**Name**E value**Alignment**Motif*

MA0232.1\_lbl 4.0935e-07

NNYAATTANN  
--TMATTA--

---

**Barhl2***forward**reverse compliment**Name**E value**Alignment**Motif*

MA0426.1\_YHP1 5.7920e-07

NNYNNTTAN  
--CAATTA-

---

**ceh-19***forward**reverse compliment**Name**E value**Alignment**Motif*

MA0426.1\_YHP1 4.4632e-07

NNCNATTAN  
--CAATTA-

---

**YHP1***forward**reverse compliment**Name**E value**Alignment**Motif*

MA0232.1\_lbl 5.2801e-06

NNYAATWWN  
--TMATTA-

---

**ATEG\_04171***forward**reverse compliment**Name**E value**Alignment**Motif*

MA0232.1\_lbl 4.6903e-06

NNNYAATTWN  
---TMATTA-

---

**NCU03266***forward**reverse compliment*

| <i>Name</i> | <i>E value</i> | <i>Alignment</i> | <i>Motif</i> |
|-------------|----------------|------------------|--------------|
|-------------|----------------|------------------|--------------|

MA0196.1\_NK7.1 1.9654e-08

NYNATTWNNN  
-CAATTAA--

---

**tup***forward**reverse compliment*

| <i>Name</i> | <i>E value</i> | <i>Alignment</i> | <i>Motif</i> |
|-------------|----------------|------------------|--------------|
|-------------|----------------|------------------|--------------|

MA0248.1\_tup 2.1446e-11

SWTAATKG  
-WTAATKG

---

**LHX4***forward**reverse compliment*

| <i>Name</i> | <i>E value</i> | <i>Alignment</i> | <i>Motif</i> |
|-------------|----------------|------------------|--------------|
|-------------|----------------|------------------|--------------|

MA0232.1\_lbl 1.2360e-07

NTAATTAN  
-TMATTA-

---

**EMX1***forward**reverse compliment**Name**E value**Alignment**Motif*

MA0232.1\_lbl 1.3018e-08

NTAATTAN  
-TMATTA-

---

**lab***forward**reverse compliment**Name**E value**Alignment**Motif*

MA0232.1\_lbl 1.0849e-08

STAATTAN  
-TMATTA-

---

**CG18599***forward**reverse compliment**Name**E value**Alignment**Motif*

MA0232.1\_lbl 1.9400e-09

TAATTAN  
TMATTA-

---

**Meox2***forward**reverse compliment**Name**E value**Alignment**Motif*

MA0232.1\_lbl

7.1346e-09

NTAATTAN  
-TMATTA-

---

**ems***forward**reverse compliment**Name**E value**Alignment**Motif*

MA0232.1\_lbl

9.6821e-09

NTAATTAN  
-TMATTA-

---

**EVX1***forward**reverse compliment**Name**E value**Alignment**Motif*

MA0232.1\_lbl 1.2369e-08

NTAATTAN  
-TMATTA-**EVX2***forward**reverse compliment**Name**E value**Alignment**Motif*

MA0232.1\_lbl

1.2336e-08

NTAATTAN  
-TAATKA-**Lim3***forward**reverse compliment**Name**E value**Alignment**Motif*

MA0232.1\_lbl

2.1239e-08

NTAATTAN  
-TAATKA-**Lhx4***forward**reverse compliment**Name**E value**Alignment**Motif*

MA0232.1\_lbl

2.0476e-08

NTAATTAN  
-TMATTA-



---

**Q9GP48\_9TURB**

| <i>forward</i> |                | <i>reverse compliment</i> |              |
|----------------|----------------|---------------------------|--------------|
| <i>Name</i>    | <i>E value</i> | <i>Alignment</i>          | <i>Motif</i> |
| MA0232.1_lbl   | 3.8246e-08     | NTAATTAN<br>-TMATTA-      |              |

---

**Q70LF3\_ARTSF**

| <i>forward</i> |                | <i>reverse compliment</i> |              |
|----------------|----------------|---------------------------|--------------|
| <i>Name</i>    | <i>E value</i> | <i>Alignment</i>          | <i>Motif</i> |
| MA0232.1_lbl   | 2.7533e-08     | NTAATTAN<br>-TMATTA-      |              |

---

**NEMVEDRAFT\_v1g205636**

| <i>forward</i> |                | <i>reverse compliment</i> |              |
|----------------|----------------|---------------------------|--------------|
| <i>Name</i>    | <i>E value</i> | <i>Alignment</i>          | <i>Motif</i> |

MA0232.1\_lbl 3.7288e-08

NTAATTAN  
-TMATTA-

---

**Esx1***forward**reverse compliment**Name**E value**Alignment**Motif*

MA0232.1\_lbl

3.5689e-08

NNTAATTN  
--TMATTA

---

**MNX1***forward**reverse compliment**Name**E value**Alignment**Motif*

MA0232.1\_lbl

2.6559e-08

NTAATTAN  
-TMATTA-

---

**DRGX***forward**reverse compliment**Name**E value**Alignment**Motif*

MA0232.1\_lbl 3.1653e-08

NYAATTAN  
-TMATTA-

---

**EN2***forward**reverse compliment**Name**E value**Alignment**Motif*

MA0232.1\_lbl 3.0403e-08

NTAATTAN  
-TMATTA-

---

**Prrx2***forward**reverse compliment**Name**E value**Alignment**Motif*

MA0232.1\_lbl 2.7448e-08

NTAATTRN  
-TAATKA-

---

**ALX3***forward**reverse compliment**Name**E value**Alignment**Motif*

MA0232.1\_lbl 2.1881e-08

NTAATTRN  
-TAATKA-

---

**SHOX***forward**reverse compliment**Name**E value**Alignment**Motif*

MA0232.1\_lbl

2.2701e-08

NYAATTAN  
-TMATTA-

---

**Awh***forward**reverse compliment**Name**E value**Alignment**Motif*

MA0232.1\_lbl

1.6501e-08

NTAATTAN  
-TMATTA-

---

**Lhx3***forward**reverse compliment**Name**E value**Alignment**Motif*

MA0232.1\_lbl

6.3907e-08

NNATTANNN  
TAATKA---

---

**uncx**

| <i>forward</i> |                | <i>reverse compliment</i> |              |
|----------------|----------------|---------------------------|--------------|
| <i>Name</i>    | <i>E value</i> | <i>Alignment</i>          | <i>Motif</i> |
| MA0232.1_lbl   | 9.0879e-08     | NNTAATTRN<br>--TAATKA-    |              |

---

**Lhx5**

| <i>forward</i> |                | <i>reverse compliment</i> |              |
|----------------|----------------|---------------------------|--------------|
| <i>Name</i>    | <i>E value</i> | <i>Alignment</i>          | <i>Motif</i> |
| MA0232.1_lbl   | 7.9458e-08     | NNNYAATTA<br>---TMATTA    |              |

---

**zfhx4**

| <i>forward</i> |                | <i>reverse compliment</i> |              |
|----------------|----------------|---------------------------|--------------|
| <i>Name</i>    | <i>E value</i> | <i>Alignment</i>          | <i>Motif</i> |

MA0232.1\_lbl 5.4071e-08

NYAATTANN  
-TMATTA--

---

**Q4RRY4\_TETNG***forward**reverse compliment**Name**E value**Alignment**Motif*

MA0232.1\_lbl

2.1430e-07

NNYAATYAN  
--TMATTA-

---

**Hoxa1***forward**reverse compliment**Name**E value**Alignment**Motif*

MA0232.1\_lbl

3.8787e-08

NNYNATTNN  
--TMATTA-

---

**HOXA1***forward**reverse compliment**Name**E value**Alignment**Motif*

MA0232.1\_lbl 1.4927e-07

NNTAATTANN  
--TAATKA--

---

**prd-b***forward**reverse compliment**Name**E value**Alignment**Motif*

MA0232.1\_lbl

7.3149e-07

NTRATTRNN  
-TAATKA--

---

**Lhx6***forward**reverse compliment**Name**E value**Alignment**Motif*

MA0232.1\_lbl

1.2291e-06

NYAATYAN  
-TMATTA-

---

**ceh-23***forward**reverse compliment**Name**E value**Alignment**Motif*

MA0232.1\_lbl 1.3081e-07

NTAATTANNN  
-TAATKA---

---

**Alx1***forward**reverse compliment**Name**E value**Alignment**Motif*

MA0232.1\_lbl

1.4374e-07

NNTAATTANN  
--TMATTA--

---

**MIXL1***forward**reverse compliment**Name**E value**Alignment**Motif*

MA0232.1\_lbl

2.4876e-07

NNYAATTANN  
--TMATTA--

---

**En2***forward**reverse compliment**Name**E value**Alignment**Motif*



MA0232.1\_lbl 6.0426e-08

NSTAATTANN  
--TMATTA--

---

**slou***forward**reverse compliment**Name**E value**Alignment**Motif*

MA0232.1\_lbl

1.4101e-07

NNYAATTANN  
--TMATTA--

---

**GSX1***forward**reverse compliment**Name**E value**Alignment**Motif*

MA0232.1\_lbl

6.6879e-08

NTMATNAN  
-TAATKA-

---

**HOXB2***forward**reverse compliment**Name**E value**Alignment**Motif*

MA0232.1\_lbl 1.5599e-08

NYAATTAN  
-TMATTA-

---

**NOTO***forward**reverse compliment**Name**E value**Alignment**Motif*

MA0232.1\_lbl

1.6063e-08

NYAATTAN  
-TMATTA-

---

**HOXB7***forward**reverse compliment**Name**E value**Alignment**Motif*

MA0232.1\_lbl

1.8210e-08

NYAATTAN  
-TMATTA-

---

**NKX6-2***forward**reverse compliment**Name**E value**Alignment**Motif*

MA0232.1\_lbl 1.8473e-08

NTAATTRN  
-TAATKA-

---

**Ubx***forward**reverse compliment**Name**E value**Alignment**Motif*

MA0232.1\_lbl

1.5127e-08

NYAATTAN  
-TMATTA-

---

**PDX1***forward**reverse compliment**Name**E value**Alignment**Motif*

MA0232.1\_lbl

1.1612e-08

YTAATKAN  
-TAATKA-

---

**HOXA2***forward**reverse compliment**Name**E value**Alignment**Motif*

MA0232.1\_lbl

8.6640e-09

NTAATTAN  
-TMATTA-

---

**Lhx2**

| <i>forward</i> |                | <i>reverse compliment</i> |              |
|----------------|----------------|---------------------------|--------------|
| <i>Name</i>    | <i>E value</i> | <i>Alignment</i>          | <i>Motif</i> |
| MA0232.1_lbl   | 9.1589e-09     | NYMATTAN<br>-TMATTA-      |              |

---

**HGTX**

| <i>forward</i> |                | <i>reverse compliment</i> |              |
|----------------|----------------|---------------------------|--------------|
| <i>Name</i>    | <i>E value</i> | <i>Alignment</i>          | <i>Motif</i> |
| MA0232.1_lbl   | 6.2738e-09     | NTMATTAN<br>-TMATTA-      |              |

---

**HOXB5**

| <i>forward</i> |                | <i>reverse compliment</i> |              |
|----------------|----------------|---------------------------|--------------|
| <i>Name</i>    | <i>E value</i> | <i>Alignment</i>          | <i>Motif</i> |
|                |                |                           |              |

MA0232.1\_lbl 5.6550e-08

NYMATTAN  
-TMATTA-

---

**HOXA7***forward**reverse compliment**Name**E value**Alignment**Motif*

MA0232.1\_lbl

1.0318e-07

NTAATKRN  
-TAATKA-

---

**HOXD4***forward**reverse compliment**Name**E value**Alignment**Motif*

MA0232.1\_lbl

6.8867e-08

NYMATTAN  
-TMATTA-

---

**Scr***forward**reverse compliment**Name**E value**Alignment**Motif*

MA0232.1\_lbl

4.3130e-08

NYMATTAN  
-TMATTA-

---

**HOXB8**

|              | <i>forward</i> | <i>reverse compliment</i> |              |
|--------------|----------------|---------------------------|--------------|
| <i>Name</i>  | <i>E value</i> | <i>Alignment</i>          | <i>Motif</i> |
| MA0232.1_lbl | 1.3096e-07     | NTAATKRC<br>-TAATKA-      |              |

---

**HOXD8**

|              | <i>forward</i> | <i>reverse compliment</i> |              |
|--------------|----------------|---------------------------|--------------|
| <i>Name</i>  | <i>E value</i> | <i>Alignment</i>          | <i>Motif</i> |
| MA0232.1_lbl | 2.2035e-07     | NTAATKRC<br>-TAATKA-      |              |

---

**HOXB6**

|             | <i>forward</i> | <i>reverse compliment</i> |              |
|-------------|----------------|---------------------------|--------------|
| <i>Name</i> | <i>E value</i> | <i>Alignment</i>          | <i>Motif</i> |
|             |                |                           |              |

MA0232.1\_lbl 3.1744e-08

GYMATTAN  
-TMATTA-

---

**HOXA5***forward**reverse compliment**Name**E value**Alignment**Motif*

MA0223.1\_exex 3.9288e-10

STAATTAS  
-TAATTAN

---

**Q0N4M8\_NEMVE***forward**reverse compliment**Name**E value**Alignment**Motif*

MA0223.1\_exex 2.3856e-09

GTAATTAN  
NTAATTA-

---

**HOXA6***forward**reverse compliment**Name**E value**Alignment**Motif*

MA0223.1\_exex 8.5000e-08

NNTAATKRCN  
--TAATTAN-

---

**abd-A**

|               |                | <i>forward</i>           | <i>reverse compliment</i> |
|---------------|----------------|--------------------------|---------------------------|
| <i>Name</i>   | <i>E value</i> | <i>Alignment</i>         | <i>Motif</i>              |
| MA0223.1_exex | 1.9332e-08     | NGTAATTANN<br>-NTAATTA-- |                           |

---

**HOXA4**

|              |                | <i>forward</i>       | <i>reverse compliment</i> |
|--------------|----------------|----------------------|---------------------------|
| <i>Name</i>  | <i>E value</i> | <i>Alignment</i>     | <i>Motif</i>              |
| MA0232.1_lbl | 8.1005e-08     | NTAATKAY<br>-TAATKA- |                           |

---

**pb**

|             |                | <i>forward</i>   | <i>reverse compliment</i> |
|-------------|----------------|------------------|---------------------------|
| <i>Name</i> | <i>E value</i> | <i>Alignment</i> | <i>Motif</i>              |



MA0232.1\_lbl 6.8619e-08

GTMATTAN  
-TMATTA-

---

**HOXB3***forward**reverse compliment*

| <i>Name</i> | <i>E value</i> | <i>Alignment</i> | <i>Motif</i> |
|-------------|----------------|------------------|--------------|
|-------------|----------------|------------------|--------------|

MA0232.1\_lbl 5.6179e-08

NNYMATTANN  
--TMATTA--

---

**NEMVEDRAFT\_v1g8907***forward**reverse compliment*

| <i>Name</i> | <i>E value</i> | <i>Alignment</i> | <i>Motif</i> |
|-------------|----------------|------------------|--------------|
|-------------|----------------|------------------|--------------|

MA0232.1\_lbl 1.4668e-07

NTAATKRNNN  
-TAATKA---

---

**Hoxd3***forward**reverse compliment*

| <i>Name</i> | <i>E value</i> | <i>Alignment</i> | <i>Motif</i> |
|-------------|----------------|------------------|--------------|
|-------------|----------------|------------------|--------------|

MA0232.1\_lbl 1.0207e-07

NNYAATTANN  
--TMATTA--

---

**Hoxa2***forward**reverse compliment**Name**E value**Alignment**Motif*

MA0232.1\_lbl

3.9527e-08

NNTAATTANN  
--TMATTA--

---

**MEOX2***forward**reverse compliment**Name**E value**Alignment**Motif*

MA0232.1\_lbl

7.0922e-08

NNTAATTANN  
--TMATTA--

---

**eve***forward**reverse compliment**Name**E value**Alignment**Motif*

MA0241.1\_ro 7.8255e-10

NSTAATTAGN  
--TAATTAR-**GSX2***forward**reverse compliment**Name**E value**Alignment**Motif*

MA0232.1\_lbl

8.5976e-09

NTAATKRS  
-TAATKA-**MEOX1***forward**reverse compliment**Name**E value**Alignment**Motif*

MA0223.1\_exex

5.9674e-09

NNTAATTASN  
--TAATTAN-**VSX2***forward**reverse compliment**Name**E value**Alignment**Motif*

MA0241.1\_ro

2.7339e-11

NTAATTAG  
-TAATTAR

---

**ARX**

| <i>forward</i> |                | <i>reverse compliment</i> |              |
|----------------|----------------|---------------------------|--------------|
| <i>Name</i>    | <i>E value</i> | <i>Alignment</i>          | <i>Motif</i> |
| MA0241.1_ro    | 3.0360e-11     | YTAATTAN<br>YTAATTA-      |              |

---

**ISX**

| <i>forward</i> |                | <i>reverse compliment</i> |              |
|----------------|----------------|---------------------------|--------------|
| <i>Name</i>    | <i>E value</i> | <i>Alignment</i>          | <i>Motif</i> |
| MA0241.1_ro    | 8.0527e-11     | CTAATTAN<br>YTAATTA-      |              |

---

**VENTX**

| <i>forward</i> |                | <i>reverse compliment</i> |              |
|----------------|----------------|---------------------------|--------------|
| <i>Name</i>    | <i>E value</i> | <i>Alignment</i>          | <i>Motif</i> |

MA0241.1\_ro 9.6463e-11

CTAATTAN  
YTAATTA-

---

**EMX2***forward**reverse compliment**Name**E value**Alignment**Motif*

MA0241.1\_ro

2.5200e-11

NTAATTAG  
-TAATTAR

---

**ro***forward**reverse compliment**Name**E value**Alignment**Motif*

MA0241.1\_ro

1.2763e-11

TAATTARN  
TAATTAR-

---

**LBX1***forward**reverse compliment**Name**E value**Alignment**Motif*

MA0241.1\_ro 4.2517e-10

NTAATTAG  
-TAATTAR

---

**pdm3***forward**reverse compliment**Name**E value**Alignment**Motif*

MA0241.1\_ro

1.8173e-10

CTAATTAN  
YTAATTA-

---

**lbl***forward**reverse compliment**Name**E value**Alignment**Motif*

MA0241.1\_ro

1.9839e-09

NTAATKAG  
-TAATTAR

---

**dve***forward**reverse compliment**Name**E value**Alignment**Motif*

MA0241.1\_ro 9.7944e-10

NCTAATTANN  
-YTAATTA--

---

**Q9BJW6\_9CNID***forward**reverse compliment**Name**E value**Alignment**Motif*

MA0241.1\_ro

8.0265e-10

NNTAATTAGN  
--TAATTAR-

---

**HESX1***forward**reverse compliment**Name**E value**Alignment**Motif*

MA0188.1\_Dr

1.7446e-09

NTAATTRGN  
-TAATTGG-

---

**exex***forward**reverse compliment**Name**E value**Alignment**Motif*

MA0198.1\_OdsH 1.1913e-08

NNNNYAATTNNCNN  
----YAATTAR---

---

**pal-1**

| <i>forward</i> |                | <i>reverse compliment</i> |              |
|----------------|----------------|---------------------------|--------------|
| <i>Name</i>    | <i>E value</i> | <i>Alignment</i>          | <i>Motif</i> |
| MA0448.1_H2.0  | 2.2106e-10     | TTWATTAC<br>NTWATNA-      |              |

---

**hox12**

| <i>forward</i>   |                | <i>reverse compliment</i> |              |
|------------------|----------------|---------------------------|--------------|
| <i>Name</i>      | <i>E value</i> | <i>Alignment</i>          | <i>Motif</i> |
| MA0174.1_CG42234 | 1.3600e-10     | GTMATWAA<br>-TMATWAA      |              |

---

**HXD12\_HETFR**

| <i>forward</i> |                | <i>reverse compliment</i> |              |
|----------------|----------------|---------------------------|--------------|
| <i>Name</i>    | <i>E value</i> | <i>Alignment</i>          | <i>Motif</i> |
| MA0206.1_abd-A | 9.0750e-11     | GTAATTAA<br>-TAATTAA      |              |



---

**ftz**

|              |                | <i>forward</i>       | <i>reverse compliment</i> |              |
|--------------|----------------|----------------------|---------------------------|--------------|
| <i>Name</i>  | <i>E value</i> | <i>Alignment</i>     |                           | <i>Motif</i> |
| MA0226.1_hbn | 2.0192e-11     | GTAATTAA<br>-YAATTAA |                           |              |

---

**Hoxc6**

|               |                | <i>forward</i>       | <i>reverse compliment</i> |              |
|---------------|----------------|----------------------|---------------------------|--------------|
| <i>Name</i>   | <i>E value</i> | <i>Alignment</i>     |                           | <i>Motif</i> |
| MA0194.1_Lim1 | 1.9802e-11     | RTAATTAA<br>-TAATTAA |                           |              |

---

**Hoxc9**

|             |                | <i>forward</i>   | <i>reverse compliment</i> |              |
|-------------|----------------|------------------|---------------------------|--------------|
| <i>Name</i> | <i>E value</i> | <i>Alignment</i> |                           | <i>Motif</i> |
|             |                |                  |                           |              |

MA0240.1\_repo 7.4846e-10

NGTAATTAAN  
--TAATTAA-**H2.0***forward**reverse compliment**Name**E value**Alignment**Motif*

MA0448.1\_H2.0 2.5989e-11

TNATWAA  
TNATWAN**Antp***forward**reverse compliment**Name**E value**Alignment**Motif*

MA0166.1\_Antp 1.2763e-11

TMATTAAR  
TMATTAA-**C15***forward**reverse compliment**Name**E value**Alignment**Motif*

MA0170.1\_C15 1.2763e-11

NTTAAWKR  
-TTAAWKR

---

**Q24780\_9CNID**

| <i>forward</i> |                | <i>reverse compliment</i>  |              |
|----------------|----------------|----------------------------|--------------|
| <i>Name</i>    | <i>E value</i> | <i>Alignment</i>           | <i>Motif</i> |
| MA0194.1_Lim1  | 7.3681e-10     | NNTAATTAANN<br>--TAATTAA-- |              |

---

**Q0N4F9\_NEMVE**

| <i>forward</i> |                | <i>reverse compliment</i> |              |
|----------------|----------------|---------------------------|--------------|
| <i>Name</i>    | <i>E value</i> | <i>Alignment</i>          | <i>Motif</i> |
| MA0180.1_Vsx2  | 1.1622e-12     | MTAATTAN-<br>CTAATTAAM    |              |

---

**P79681\_ACIBE**

| <i>forward</i> |                | <i>reverse compliment</i> |              |
|----------------|----------------|---------------------------|--------------|
| <i>Name</i>    | <i>E value</i> | <i>Alignment</i>          | <i>Motif</i> |
|                |                |                           |              |

MA0180.1\_Vsx2 6.4537e-13

NTAATTAA-  
CTAATTAAM

---

**SPU\_026099***forward**reverse compliment**Name**E value**Alignment**Motif*

MA0180.1\_Vsx2 8.9306e-13

NTAATTAA-  
CTAATTAAM

---

**vab-7***forward**reverse compliment**Name**E value**Alignment**Motif*

MA0180.1\_Vsx2 1.7780e-12

MTAATTAA-  
CTAATTAAM

---

**ENSTNIG00000004116***forward**reverse compliment**Name**E value**Alignment**Motif*

MA0180.1\_Vsx2 5.9242e-13

CTAATTAA-  
CTAATTAAM

---

**Smp\_158000***forward**reverse compliment**Name**E value**Alignment**Motif*

MA0180.1\_Vsx2 4.7229e-13

CYAATTAA-  
CTAATTAAM

---

**NEMVEDRAFT\_v1g164989***forward**reverse compliment**Name**E value**Alignment**Motif*

MA0180.1\_Vsx2 7.4326e-12

CTAATTAR-  
CTAATTAAM

---

**ARGFX***forward**reverse compliment**Name**E value**Alignment**Motif*

MA0180.1\_Vsx2 1.2971e-10

NCTAATTARN  
-CTAATTAAM

---

**vsx2**

|               |                | <i>forward</i>             | <i>reverse compliment</i> |
|---------------|----------------|----------------------------|---------------------------|
| <i>Name</i>   | <i>E value</i> | <i>Alignment</i>           | <i>Motif</i>              |
| MA0180.1_Vsx2 | 3.4137e-10     | NYTAATTAANN<br>-CTAATTAAM- |                           |

---

**Q24782\_9CNID**

|               |                | <i>forward</i>       | <i>reverse compliment</i> |
|---------------|----------------|----------------------|---------------------------|
| <i>Name</i>   | <i>E value</i> | <i>Alignment</i>     | <i>Motif</i>              |
| MA0194.1_Lim1 | 1.4038e-11     | TTAATTAA<br>-TAATTAA |                           |

---

**CG32105**

|             |                | <i>forward</i>   | <i>reverse compliment</i> |
|-------------|----------------|------------------|---------------------------|
| <i>Name</i> | <i>E value</i> | <i>Alignment</i> | <i>Motif</i>              |

MA0236.1\_otp 3.4164e-11

TTAATTAR  
-TAATTAR

---

**repo***forward**reverse compliment*

| <i>Name</i> | <i>E value</i> | <i>Alignment</i> | <i>Motif</i> |
|-------------|----------------|------------------|--------------|
|-------------|----------------|------------------|--------------|

MA0240.1\_repo 2.8598e-10

NYTAATTAAN  
--TAATTAA-

---

**CNK00090***forward**reverse compliment*

| <i>Name</i> | <i>E value</i> | <i>Alignment</i> | <i>Motif</i> |
|-------------|----------------|------------------|--------------|
|-------------|----------------|------------------|--------------|

MA0240.1\_repo 2.3502e-11

ATAATTAA  
-TAATTAA

---

**HOXC4***forward**reverse compliment*

| <i>Name</i> | <i>E value</i> | <i>Alignment</i> | <i>Motif</i> |
|-------------|----------------|------------------|--------------|
|-------------|----------------|------------------|--------------|

MA0240.1\_repo 2.0401e-11

NTAATTAA  
-TAATTAA

---

**CAD25284***forward**reverse compliment**Name**E value**Alignment**Motif*

MA0194.1\_Lim1 1.5897e-11

TTAATTAN  
TTAATTA-

---

**LMX1A***forward**reverse compliment**Name**E value**Alignment**Motif*

MA0172.1\_CG11294 1.7100e-11

TTAATTAN  
TTAATTA-

---

**Tlx2***forward**reverse compliment**Name**E value**Alignment**Motif*



MA0194.1\_Lim1 2.7621e-10

TAWTTAAT  
TAATTAA-

---

**ventx3.2***forward**reverse compliment**Name**E value**Alignment**Motif*

MA0194.1\_Lim1 1.7841e-11

ATTAATTA  
-TTAATTA

---

**CBG00029***forward**reverse compliment**Name**E value**Alignment**Motif*

MA0194.1\_Lim1 1.6173e-11

TAATTAAT  
TAATTAA-

---

**HHEX***forward**reverse compliment**Name**E value**Alignment**Motif*

MA0172.1\_CG11294 2.1773e-10

TAATTNAW  
TAATTAA-

---

**ENSCING00000016045***forward**reverse compliment*

| <i>Name</i>   | <i>E value</i> | <i>Alignment</i>          | <i>Motif</i> |
|---------------|----------------|---------------------------|--------------|
| MA0180.1_Vsx2 | 5.3273e-10     | NCYAATTARNN<br>-CTAATTAA- |              |

---

**RAX***forward**reverse compliment*

| <i>Name</i> | <i>E value</i> | <i>Alignment</i>     | <i>Motif</i> |
|-------------|----------------|----------------------|--------------|
| MA0202.1_Rx | 5.1507e-11     | NTAATTAR<br>-TAATTAR |              |

---

**inv***forward**reverse compliment*

| <i>Name</i> | <i>E value</i> | <i>Alignment</i> | <i>Motif</i> |
|-------------|----------------|------------------|--------------|
|-------------|----------------|------------------|--------------|

MA0229.1\_inv 6.5503e-15

TAATTARW  
TAATTARW**ap***forward**reverse compliment**Name**E value**Alignment**Motif*

MA0209.1\_ap

1.2763e-11

TAATTARN  
TAATTAR-**lim-4***forward**reverse compliment**Name**E value**Alignment**Motif*

MA0181.1\_Vsx1

9.2564e-11

NNTAATTAR  
--TAATTAR**ind***forward**reverse compliment**Name**E value**Alignment**Motif*

MA0228.1\_ind 7.6496e-11

TAATTARNR  
TAATTAR--

---

**Sebox**

|               | <i>forward</i> | <i>reverse compliment</i> |              |
|---------------|----------------|---------------------------|--------------|
| <i>Name</i>   | <i>E value</i> | <i>Alignment</i>          | <i>Motif</i> |
| MA0194.1_Lim1 | 2.5830e-10     | NTAATTAANN<br>-TAATTAA--  |              |

---

**mixl1.S**

|               | <i>forward</i> | <i>reverse compliment</i>  |              |
|---------------|----------------|----------------------------|--------------|
| <i>Name</i>   | <i>E value</i> | <i>Alignment</i>           | <i>Motif</i> |
| MA0194.1_Lim1 | 6.0393e-10     | NNTAATTAANN<br>--TAATTAA-- |              |

---

**C4B866\_NEMVE**

|             | <i>forward</i> | <i>reverse compliment</i> |              |
|-------------|----------------|---------------------------|--------------|
| <i>Name</i> | <i>E value</i> | <i>Alignment</i>          | <i>Motif</i> |

MA0194.1\_Lim1 1.2649e-09

NNNTAATTAANN  
---TAATTAA--

---

**CAD26261***forward**reverse compliment*

| <i>Name</i> | <i>E value</i> | <i>Alignment</i> | <i>Motif</i> |
|-------------|----------------|------------------|--------------|
|-------------|----------------|------------------|--------------|

MA0178.1\_CG32105 2.6988e-08

TWWATTANN  
TTAATTA--

---

**LHX9***forward**reverse compliment*

| <i>Name</i> | <i>E value</i> | <i>Alignment</i> | <i>Motif</i> |
|-------------|----------------|------------------|--------------|
|-------------|----------------|------------------|--------------|

MA0232.1\_lbl 2.4650e-07

NNTNATTAN  
--TMATTA-

---

**POU6F1***forward**reverse compliment*

| <i>Name</i> | <i>E value</i> | <i>Alignment</i> | <i>Motif</i> |
|-------------|----------------|------------------|--------------|
|-------------|----------------|------------------|--------------|

MA0232.1\_lbl 1.9095e-07

NNTAATTANN  
--TAATKA--

---

**Q86SD7\_PODCA***forward**reverse compliment**Name**E value**Alignment**Motif*

MA0232.1\_lbl 2.5359e-07

NNTAATTANN  
--TMATTA--

---

**CBG07641***forward**reverse compliment**Name**E value**Alignment**Motif*

MA0232.1\_lbl 1.8462e-07

NNTAATTANN  
--TMATTA--

---

**ceh-62***forward**reverse compliment**Name**E value**Alignment**Motif*

MA0232.1\_lbl 2.4811e-07

NNTAATTANN  
--TMATTA--

---

**ZFHX2***forward**reverse compliment**Name**E value**Alignment**Motif*

MA0232.1\_lbl 2.6731e-07

NNTAATTANN  
--TAATKA--

---

**btn***forward**reverse compliment**Name**E value**Alignment**Motif*

MA0232.1\_lbl 7.5444e-08

NNTMATTANN  
--TMATTA--

---

**LMX1B***forward**reverse compliment**Name**E value**Alignment**Motif*

MA0232.1\_lbl 2.8185e-07

NNNNTAATTAN  
----TMATTA--

---

**SNAPOd2T00006145001***forward**reverse compliment*

| <i>Name</i> | <i>E value</i> | <i>Alignment</i> | <i>Motif</i> |
|-------------|----------------|------------------|--------------|
|-------------|----------------|------------------|--------------|

MA0232.1\_lbl 2.6419e-06

NNYAATYANN  
--TMATTA--

---

**HMX3***forward**reverse compliment*

| <i>Name</i> | <i>E value</i> | <i>Alignment</i> | <i>Motif</i> |
|-------------|----------------|------------------|--------------|
|-------------|----------------|------------------|--------------|

MA0426.1\_YHP1 2.8398e-07

NNCAMTTANNN  
--CAATTA---

---

**SNAPOd2T00003340001***forward**reverse compliment*

| <i>Name</i> | <i>E value</i> | <i>Alignment</i> | <i>Motif</i> |
|-------------|----------------|------------------|--------------|
|-------------|----------------|------------------|--------------|



MA0232.1\_lbl 6.4014e-06

NWWATTANNN  
-TAATKA---

---

**CG4328***forward**reverse compliment*

| <i>Name</i>     | <i>E value</i> | <i>Alignment</i>     | <i>Motif</i> |
|-----------------|----------------|----------------------|--------------|
| MA0182.1_CG4328 | 1.4526e-07     | YAATWAWN<br>YAATWAW- |              |

---

**hbx10***forward**reverse compliment*

| <i>Name</i>     | <i>E value</i> | <i>Alignment</i>     | <i>Motif</i> |
|-----------------|----------------|----------------------|--------------|
| MA0182.1_CG4328 | 1.1851e-05     | NWWATTRN<br>WTWATTR- |              |

---

**Q8I9J5\_9BILA***forward**reverse compliment*

| <i>Name</i> | <i>E value</i> | <i>Alignment</i> | <i>Motif</i> |
|-------------|----------------|------------------|--------------|
|-------------|----------------|------------------|--------------|

MA0448.1\_H2.0 3.6600e-05

NRTWATTANN  
-NTWATNA--

---

**Q7M3U4\_ACRFO***forward**reverse compliment**Name**E value**Alignment**Motif*

MA0075.1\_Prrx2 1.9488e-05

NNNTAATTNNN  
---TAATT---

---

**ENSTNIG00000006040***forward**reverse compliment**Name**E value**Alignment**Motif*

MA0426.1\_YHP1 8.7845e-07

NNNYNATTANNNN  
---CAATTA----

---

**CBG04010***forward**reverse compliment**Name**E value**Alignment**Motif*

MA0206.1\_abd-A 7.7487e-06

NNTTAATKNNN  
--TTAATTA--

---

**CNG03450***forward**reverse compliment**Name**E value**Alignment**Motif*

MA0444.1\_CG34031 7.7102e-07

NNWATTAAAN  
-CAATTAA-

---

**HDG11***forward**reverse compliment**Name**E value**Alignment**Motif*

MA0151.1\_ARID3A 3.6185e-06

NCATTWAWKN  
--ATTAAA--

---

**ANL2***forward**reverse compliment**Name**E value**Alignment**Motif*

MA0206.1\_abd-A 4.3694e-06

NNAATTAAATGN  
-TAATTAA---

---

**ATML1***forward**reverse compliment**Name**E value**Alignment**Motif*

MA0186.1\_Dfd

8.4622e-05

NNNANTNANN  
-TCATTAA--

---

**Dfd***forward**reverse compliment**Name**E value**Alignment**Motif*

MA0232.1\_lbl

1.7692e-06

NNYCATTANN  
--TMATTA--

---

**zen***forward**reverse compliment**Name**E value**Alignment**Motif*

MA0232.1\_lbl 7.9820e-08

NTAATKAN  
-TAATKA-

---

**zen2***forward**reverse compliment**Name**E value**Alignment**Motif*

MA0232.1\_lbl

2.1091e-08

NTMATTAN  
-TMATTA-

---

**NKX6-3***forward**reverse compliment**Name**E value**Alignment**Motif*

MA0215.1\_btn

3.0070e-09

NTCATTAWN  
-TCATTAN-

---

**HNF1B***forward**reverse compliment**Name**E value**Alignment**Motif*

MA0153.1\_HNF1B 5.5378e-13

RTTAATNATTAAC  
GTTAAWYATTAA-

---

**HNF1A***forward**reverse compliment**Name**E value**Alignment**Motif*

MA0153.1\_HNF1B 6.3727e-14

NRTTAATNATTAACN  
--TTAATRWTTAAC-

---

**ATHB-16***forward**reverse compliment**Name**E value**Alignment**Motif*

MA0008.1\_HAT5 1.8398e-09

TAATMATT-  
-AATAATTN

---

**NANOG***forward**reverse compliment**Name**E value**Alignment**Motif*

MA0214.1\_bsh 1.0306e-04

NCNRTYAN  
-YMATTA

---

**NEMVEDRAFT\_v1g113057***forward**reverse compliment*

| <i>Name</i>  | <i>E value</i> | <i>Alignment</i>         | <i>Motif</i> |
|--------------|----------------|--------------------------|--------------|
| MA0212.1_bcd | 2.6743e-08     | NNGGATTARN<br>--GGATTA-- |              |

---

**HBX4\_ECHGR***forward**reverse compliment*

| <i>Name</i>  | <i>E value</i> | <i>Alignment</i>         | <i>Motif</i> |
|--------------|----------------|--------------------------|--------------|
| MA0190.1_Gsc | 3.2658e-08     | NNGGATTANN<br>--GGATTA-- |              |

---

**OC***forward**reverse compliment*

| <i>Name</i> | <i>E value</i> | <i>Alignment</i> | <i>Motif</i> |
|-------------|----------------|------------------|--------------|
|-------------|----------------|------------------|--------------|

MA0212.1\_bcd 3.8618e-09

NGGATTAN  
-GGATTA-

---

**GSC***forward**reverse compliment**Name**E value**Alignment**Motif*

MA0234.1\_oc

3.9560e-09

NTAATCCN  
-TAATCC-

---

**Gsc***forward**reverse compliment**Name**E value**Alignment**Motif*

MA0234.1\_oc

9.9606e-10

NGGATTA  
-GGATTA

---

**Q8VHG7\_MOUSE***forward**reverse compliment**Name**E value**Alignment**Motif*



MA0201.1\_Ptx1 2.4983e-10

NGGATTAW  
-GGATTAA

---

**PITX1***forward**reverse compliment**Name**E value**Alignment**Motif*

MA0234.1\_oc

3.8797e-09

NGGATTAN  
-GGATTA-

---

**CBG01820***forward**reverse compliment**Name**E value**Alignment**Motif*

MA0212.1\_bcd

3.9289e-09

NGGATTAN  
-GGATTA-

---

**PITX3***forward**reverse compliment**Name**E value**Alignment**Motif*

MA0234.1\_oc 3.7633e-09

NGGATTAN  
-GGATTA-

---

**OTX1***forward**reverse compliment**Name**E value**Alignment**Motif*

MA0234.1\_oc

3.7603e-09

NTAATCCN  
-TAATCC-

---

**Ptx1***forward**reverse compliment**Name**E value**Alignment**Motif*

MA0234.1\_oc

5.0663e-09

NGGATTAN  
-GGATTA-

---

**Pitx2***forward**reverse compliment**Name**E value**Alignment**Motif*

MA0234.1\_oc 4.9980e-09

NGGATTAN  
-GGATTA-

---

**Pitx3***forward**reverse compliment**Name**E value**Alignment**Motif*

MA0234.1\_oc

6.8909e-09

NGGATTAN  
-GGATTA-

---

**PITX2***forward**reverse compliment**Name**E value**Alignment**Motif*

MA0234.1\_oc

7.9895e-09

NTAATCCN  
-TAATCC-

---

**DMBX1***forward**reverse compliment**Name**E value**Alignment**Motif*

MA0234.1\_oc 8.8704e-09

NGGATTAN  
-GGATTA-

---

**ceh-53***forward**reverse compliment**Name**E value**Alignment**Motif*

MA0190.1\_Gsc 4.6874e-09

NRGATTAN  
-GGATTA-

---

**ceh-37***forward**reverse compliment**Name**E value**Alignment**Motif*

MA0190.1\_Gsc 4.0372e-09

NGGATTAN  
-GGATTA-

---

**AGAP006642***forward**reverse compliment**Name**E value**Alignment**Motif*

MA0190.1\_Gsc 4.0356e-09

GGATTANN  
GGATTA--

---

**Pitx1***forward**reverse compliment**Name**E value**Alignment**Motif*

MA0234.1\_oc

1.8154e-08

NNGGATTAN  
--GGATTA--

---

**Dobox5\_CONSTRUCT***forward**reverse compliment**Name**E value**Alignment**Motif*

MA0190.1\_Gsc

2.6002e-08

NTAATCYNN  
-TAATCC--

---

**Obox6***forward**reverse compliment**Name**E value**Alignment**Motif*

MA0190.1\_Gsc 2.0177e-08

NNRGATTAN  
--GGATTA-

---

**Obox1***forward**reverse compliment**Name**E value**Alignment**Motif*

MA0190.1\_Gsc 3.5326e-08

NNNGGATTAN  
---GGATTA-

---

**DPRX***forward**reverse compliment**Name**E value**Alignment**Motif*

MA0190.1\_Gsc 2.8082e-08

NGGATTATCN  
-GGATTA---

---

**RHOXF1***forward**reverse compliment**Name**E value**Alignment**Motif*

MA0234.1\_oc 4.4835e-08

GGATNATCN  
GGATTA---

---

**CRX***forward**reverse compliment*

| <i>Name</i> | <i>E value</i> | <i>Alignment</i> | <i>Motif</i> |
|-------------|----------------|------------------|--------------|
|-------------|----------------|------------------|--------------|

MA0212.1\_bcd 2.6743e-08

NSGGATTAGN  
--GGATTA--

---

**bcd***forward**reverse compliment*

| <i>Name</i> | <i>E value</i> | <i>Alignment</i> | <i>Motif</i> |
|-------------|----------------|------------------|--------------|
|-------------|----------------|------------------|--------------|

MA0234.1\_oc 5.4501e-08

NNGGATTANNN  
--GGATTA---

---

**ceh-36***forward**reverse compliment*

| <i>Name</i> | <i>E value</i> | <i>Alignment</i> | <i>Motif</i> |
|-------------|----------------|------------------|--------------|
|-------------|----------------|------------------|--------------|

MA0234.1\_oc 2.6099e-05

NNGATTAN  
-GGATTA-

---

**Otx2***forward**reverse compliment**Name**E value**Alignment**Motif*

MA0234.1\_oc

2.8635e-05

NNGATTAN  
-GGATTA-

---

**Crx***forward**reverse compliment**Name**E value**Alignment**Motif*

MA0234.1\_oc

2.9955e-05

NNGATTAN  
-GGATTA-

---

**Dmbx1***forward**reverse compliment**Name**E value**Alignment**Motif*



MA0234.1\_oc 4.4797e-05

NNRGATTAN  
--GGATTA-

---

**dharm***forward**reverse compliment**Name**E value**Alignment**Motif*

MA0234.1\_oc

4.8065e-04

NNNATCC  
-TAATCC

---

**LHX6***forward**reverse compliment**Name**E value**Alignment**Motif*

MA0235.1\_onecut

2.8624e-04

NYAATCAN  
-NAATCAA

---

**Duxbl1***forward**reverse compliment**Name**E value**Alignment**Motif*

MA0235.1\_onecut 4.4831e-04

NNYAATCAN  
--NAATCAA

---

**WOX13***forward**reverse compliment*

| <i>Name</i>   | <i>E value</i> | <i>Alignment</i>             | <i>Motif</i> |
|---------------|----------------|------------------------------|--------------|
| MA0070.1_PBX1 | 5.5638e-06     | NNTGATTGAN--<br>NTTGATTGATNN |              |

---

**PBX1***forward**reverse compliment*

| <i>Name</i>   | <i>E value</i> | <i>Alignment</i>             | <i>Motif</i> |
|---------------|----------------|------------------------------|--------------|
| MA0070.1_PBX1 | 1.9530e-07     | -NTGATTGAYR-<br>NTTGATTGATNN |              |

---

**Q00354\_COPCI***forward**reverse compliment*

| <i>Name</i> | <i>E value</i> | <i>Alignment</i> | <i>Motif</i> |
|-------------|----------------|------------------|--------------|
|-------------|----------------|------------------|--------------|

MA0316.1\_HAP5 3.4094e-09

ACCAATCN-----  
ACCAATNAGMNNSSN

---

**Q00352\_COPCI***forward**reverse compliment*

| <i>Name</i>   | <i>E value</i> | <i>Alignment</i>                     | <i>Motif</i> |
|---------------|----------------|--------------------------------------|--------------|
| MA0060.1_NFYA | 4.3583e-09     | ----TGATTGGTT---<br>NNNCYSATTGGYYNNN |              |

---

**Q68SS9\_PLEDJ***forward**reverse compliment*

| <i>Name</i>   | <i>E value</i> | <i>Alignment</i>                 | <i>Motif</i> |
|---------------|----------------|----------------------------------|--------------|
| MA0315.1_HAP4 | 9.4207e-07     | NNCAATCN-----<br>NCCAATCARNNNNNN |              |

---

**HAT1***forward**reverse compliment*

| <i>Name</i> | <i>E value</i> | <i>Alignment</i> | <i>Motif</i> |
|-------------|----------------|------------------|--------------|
|-------------|----------------|------------------|--------------|

MA0235.1\_onecut 1.4678e-04

NYAATCATNN  
-NAATCAA--

---

**hbx5-2***forward**reverse compliment**Name**E value**Alignment**Motif*

MA0235.1\_onecut 9.7419e-08

NYAATCAW  
-NAATCAA

---

**hbx5-1***forward**reverse compliment**Name**E value**Alignment**Motif*

MA0070.1\_PBX1 4.1702e-10

-TTGATTGR---  
NTTGATTGATNN

---

**ATHB-7***forward**reverse compliment**Name**E value**Alignment**Motif*

MA0070.1\_PBX1 1.0559e-04

NNATGATTGN---  
-NTTGATTGATNN

---

**HAT3***forward**reverse compliment**Name**E value**Alignment**Motif*

MA0235.1\_onecut 2.3651e-05

NYAATCAN  
-NAATCAA

---

**GRMZM2G038252***forward**reverse compliment**Name**E value**Alignment**Motif*

MA0426.1\_YHP1 9.8215e-06

NCAATCAN  
-CAATTA-

---

**ENSTNIG00000017092***forward**reverse compliment**Name**E value**Alignment**Motif*

MA0235.1\_onecut 1.9058e-05

NTAATCAN  
-NAATCAA

---

**SNOG\_08903***forward**reverse compliment**Name**E value**Alignment**Motif*

MA0235.1\_onecut 1.5205e-10

YAAATCAA  
-NAATCAA

---

**NEMVEDRAFT\_v1g101664***forward**reverse compliment**Name**E value**Alignment**Motif*

MA0070.1\_PBX1 5.5008e-06

---GATYGATT-  
NTTGATTGATNN

---

**Lhx6\_CONSTRUCT***forward**reverse compliment**Name**E value**Alignment**Motif*

MA0075.1\_Prrx2 2.2088e-04

NNTRATTRN  
--TAATT--

---

**Cphx1***forward**reverse compliment**Name**E value**Alignment**Motif*

MA0235.1\_onecut 1.1410e-03

NNNNNNATCW-  
----NAATCAA

---

**ATHB-6***forward**reverse compliment**Name**E value**Alignment**Motif*

MA0110.1\_ATHB-5 6.6140e-05

NNAATNATN--  
--AATMATTGN

---

**Q9C1N5\_COPSC***forward**reverse compliment**Name**E value**Alignment**Motif*

MA0037.1\_GATA3 5.0444e-03

NNCAATCNN  
--YTATCN-

---

**AAEL012091***forward**reverse compliment**Name**E value**Alignment**Motif*

MA0212.1\_bcd

1.3723e-02

NNGATNNNN  
-GGATTA--

---

**BARX1***forward**reverse compliment**Name**E value**Alignment**Motif*

MA0151.1\_ARID3A 1.2246e-06

NNATTAAAWANCNATTA  
--ATTAAA-----

---

**Msx3***forward**reverse compliment**Name**E value**Alignment**Motif*



MA0192.1\_Hmx 1.0690e-08

NCAATTANNNNSCAATTA  
-CAATTAA-----

---

**Q0ZPQ4\_NEMVE***forward**reverse compliment*

| <i>Name</i>   | <i>E value</i> | <i>Alignment</i>         | <i>Motif</i> |
|---------------|----------------|--------------------------|--------------|
| MA0127.1_PEND | 1.6660e-08     | -TTAAGAAG-<br>MATAAGAANT |              |

---

**TLX3***forward**reverse compliment*

| <i>Name</i> | <i>E value</i> | <i>Alignment</i>                           | <i>Motif</i> |
|-------------|----------------|--------------------------------------------|--------------|
| MA0188.1_Dr | 1.1926e-03     | NAATTGNNNNNNNNNNNNNNCAATTN<br>TAATTGG----- |              |

---

**Lhx8***forward**reverse compliment*

| <i>Name</i> | <i>E value</i> | <i>Alignment</i> | <i>Motif</i> |
|-------------|----------------|------------------|--------------|
|-------------|----------------|------------------|--------------|

MA0198.1\_OdsH 9.5457e-08

NTRATTANNNNTRATTAN  
-----YTAATTR-

---

**ventx1.1.L***forward**reverse compliment**Name**E value**Alignment**Motif*

MA0075.1\_Prrx2 1.2557e-02

NNNNNNNNNN  
--TAATT---

---

**Hlx***forward**reverse compliment**Name**E value**Alignment**Motif*

MA0075.1\_Prrx2 9.7967e-03

NNWTNNN  
TAATT--

---

**Lmx1b***forward**reverse compliment**Name**E value**Alignment**Motif*

MA0075.1\_Prrx2 2.9556e-03

NTNATNN  
-TAATT-

---

**Lmx1a***forward**reverse compliment**Name**E value**Alignment**Motif*

MA0075.1\_Prrx2 5.3755e-03

NYNATNNN  
-TAATT--

---

**kal-1***forward**reverse compliment**Name**E value**Alignment**Motif*

MA0075.1\_Prrx2 6.1057e-03

NNNNANNN  
--TAATT-

---

**PHO2***forward**reverse compliment**Name**E value**Alignment**Motif*

MA0075.1\_Prrx2 1.2104e-02

NNNATNNNNN  
-TAATT----

---

**ceh-51**

|                | <i>forward</i> | <i>reverse compliment</i> |              |
|----------------|----------------|---------------------------|--------------|
| <i>Name</i>    | <i>E value</i> | <i>Alignment</i>          | <i>Motif</i> |
| MA0075.1_Prrx2 | 4.0765e-02     | NNYNATNNN<br>--TAATT--    |              |

---

**UM04928**

|                | <i>forward</i> | <i>reverse compliment</i> |              |
|----------------|----------------|---------------------------|--------------|
| <i>Name</i>    | <i>E value</i> | <i>Alignment</i>          | <i>Motif</i> |
| MA0075.1_Prrx2 | 1.3088e-02     | NNNNNATNNN<br>---TAATT--  |              |

---

**LHX2**

|             | <i>forward</i> | <i>reverse compliment</i> |              |
|-------------|----------------|---------------------------|--------------|
| <i>Name</i> | <i>E value</i> | <i>Alignment</i>          | <i>Motif</i> |

MA0075.1\_Prrx2 8.0794e-03

NNNNAANNNN  
---TAATT--

---

**Q0N4H9\_NEMVE***forward**reverse compliment**Name**E value**Alignment**Motif*

MA0075.1\_Prrx2 2.6414e-02

NNYRANNNN  
--TAATT--

---

**NEMVEDRAFT\_v1g129868***forward**reverse compliment**Name**E value**Alignment**Motif*

MA0075.1\_Prrx2 5.9220e-03

NYNANNNNN  
-TAATT---

---

**NEMVEDRAFT\_v1g136480***forward**reverse compliment**Name**E value**Alignment**Motif*

MA0094.1\_Ubx 7.7218e-03

NNNNNNNNNN  
----ATT--

---

**GSC2***forward**reverse compliment**Name**E value**Alignment**Motif*

MA0094.1\_Ubx 2.0696e-03

NTAATNNN  
-TAAT---

---

**Isl2***forward**reverse compliment**Name**E value**Alignment**Motif*

MA0094.1\_Ubx 3.3589e-03

NNNTNNN  
--ATT--

---

**Obox3***forward**reverse compliment**Name**E value**Alignment**Motif*

MA0094.1\_Ubx 1.7438e-03

NNATNWN  
--ATTA-

---

**Msx1***forward**reverse compliment**Name**E value**Alignment**Motif*

MA0094.1\_Ubx 1.2509e-03

NNATTAN  
--ATTA-

---

**Hoxc5***forward**reverse compliment**Name**E value**Alignment**Motif*

MA0094.1\_Ubx 1.3094e-03

NNATTNN  
--ATTA-

---

**POU5F1B***forward**reverse compliment**Name**E value**Alignment**Motif*

MA0075.1\_Prrx2 3.0457e-03

NNAANNN  
-TAATT-

---

**Dlx4***forward**reverse compliment**Name**E value**Alignment**Motif*

MA0075.1\_Prrx2 2.1990e-03

NTAATNNN  
-TAATT--

---

**E5***forward**reverse compliment**Name**E value**Alignment**Motif*

MA0075.1\_Prrx2 1.9975e-03

NTAATNNN  
-TAATT--

---

**Isx***forward**reverse compliment**Name**E value**Alignment**Motif*



MA0094.1\_Ubx 2.0861e-03

NNATTNNN  
--ATTA--

---

**Q6WL90\_TRICY***forward**reverse compliment**Name**E value**Alignment**Motif*

MA0075.1\_Prrx2 1.9260e-03

NTAATNNN  
-TAATT--

---

**VAX2***forward**reverse compliment**Name**E value**Alignment**Motif*

MA0075.1\_Prrx2 2.0276e-03

NNTAATNN  
--TAATT-

---

**Pdx1***forward**reverse compliment**Name**E value**Alignment**Motif*

MA0094.1\_Ubx 2.5080e-03

NNNATTAN  
---ATTA-

---

**Rhox6**

| <i>forward</i> |                | <i>reverse compliment</i> |              |
|----------------|----------------|---------------------------|--------------|
| <i>Name</i>    | <i>E value</i> | <i>Alignment</i>          | <i>Motif</i> |
| MA0094.1_Ubx   | 2.0443e-03     | NTAATNNN<br>-TAAT---      |              |

---

**Evx2**

| <i>forward</i> |                | <i>reverse compliment</i> |              |
|----------------|----------------|---------------------------|--------------|
| <i>Name</i>    | <i>E value</i> | <i>Alignment</i>          | <i>Motif</i> |
| MA0075.1_Prrx2 | 2.3487e-03     | NNATTANN<br>-AATTA--      |              |

---

**Otp**

| <i>forward</i> |                | <i>reverse compliment</i> |              |
|----------------|----------------|---------------------------|--------------|
| <i>Name</i>    | <i>E value</i> | <i>Alignment</i>          | <i>Motif</i> |

MA0075.1\_Prrx2 2.0878e-03

NNTAATNN  
--TAATT-

---

**Phox2a***forward**reverse compliment**Name**E value**Alignment**Motif*

MA0094.1\_Ubx 2.1722e-03

NNATTNNN  
--ATTA--

---

**Phox2b***forward**reverse compliment**Name**E value**Alignment**Motif*

MA0075.1\_Prrx2 2.3015e-03

NNNAATNN  
--TAATT-

---

**Obox5***forward**reverse compliment**Name**E value**Alignment**Motif*

MA0094.1\_Ubx 2.4391e-03

NNNATNAN  
---ATTA-

---

**Barx2**

|              |                | <i>forward</i>         | <i>reverse compliment</i> |
|--------------|----------------|------------------------|---------------------------|
| <i>Name</i>  | <i>E value</i> | <i>Alignment</i>       | <i>Motif</i>              |
| MA0094.1_Ubx | 3.1310e-03     | NNNNATTAN<br>----ATTA- |                           |

---

**Vax1**

|                |                | <i>forward</i>         | <i>reverse compliment</i> |
|----------------|----------------|------------------------|---------------------------|
| <i>Name</i>    | <i>E value</i> | <i>Alignment</i>       | <i>Motif</i>              |
| MA0075.1_Prrx2 | 3.3455e-03     | NTAATNNNN<br>-TAATT--- |                           |

---

**Dlx3**

|             |                | <i>forward</i>   | <i>reverse compliment</i> |
|-------------|----------------|------------------|---------------------------|
| <i>Name</i> | <i>E value</i> | <i>Alignment</i> | <i>Motif</i>              |

MA0075.1\_Prrx2 3.2354e-03

NTAATNNNN  
-TAATT---

---

**barx1***forward**reverse compliment**Name**E value**Alignment**Motif*

MA0075.1\_Prrx2 3.1848e-03

NNNNATTAN  
---AATTA-

---

**Vax2***forward**reverse compliment**Name**E value**Alignment**Motif*

MA0075.1\_Prrx2 3.3359e-03

NTAATNNNN  
-TAATT---

---

**Hoxb3***forward**reverse compliment**Name**E value**Alignment**Motif*

MA0075.1\_Prrx2 3.1781e-03

NTAATNNNN  
-TAATT----

---

**Hoxa5***forward**reverse compliment**Name**E value**Alignment**Motif*

MA0094.1\_Ubx 3.3308e-03

NTAATNNNN  
-TAAT-----

---

**Hoxb4***forward**reverse compliment**Name**E value**Alignment**Motif*

MA0094.1\_Ubx 3.3626e-03

NTAATNNNN  
-TAAT-----

---

**Hoxc4***forward**reverse compliment**Name**E value**Alignment**Motif*

MA0094.1\_Ubx 3.5159e-03

NNNNATTAN  
----ATTA-**Evx1***forward**reverse compliment**Name**E value**Alignment**Motif*

MA0075.1\_Prrx2 3.1475e-03

NTAATNNNN  
-TAATT---**Hoxa4***forward**reverse compliment**Name**E value**Alignment**Motif*

MA0094.1\_Ubx 3.2531e-03

NTAATNNNN  
-TAAT----**Gsx2***forward**reverse compliment**Name**E value**Alignment**Motif*

MA0075.1\_Prrx2 3.0869e-03

NTAATNNNN  
-TAATT---

---

**Emx2***forward**reverse compliment**Name**E value**Alignment**Motif*

MA0075.1\_Prrx2 3.2531e-03

NTAATNNNN  
-TAATT---

---

**Nkx1-2***forward**reverse compliment**Name**E value**Alignment**Motif*

MA0075.1\_Prrx2 3.3875e-03

NNTAATNNN  
--TAATT--

---

**Nkx6-1***forward**reverse compliment**Name**E value**Alignment**Motif*



MA0075.1\_Prrx2 3.4714e-03

NNTAATNRN  
--TAATT--

---

**NEMVEDRAFT\_v1g81309***forward**reverse compliment*

| <i>Name</i>    | <i>E value</i> | <i>Alignment</i>       | <i>Motif</i> |
|----------------|----------------|------------------------|--------------|
| MA0075.1_Prrx2 | 3.3645e-03     | NNNNATTAN<br>---AATTA- |              |

---

**Bsx***forward**reverse compliment*

| <i>Name</i>    | <i>E value</i> | <i>Alignment</i>       | <i>Motif</i> |
|----------------|----------------|------------------------|--------------|
| MA0075.1_Prrx2 | 3.4670e-03     | NTAATNNNN<br>-TAATT--- |              |

---

**Lbx2***forward**reverse compliment*

| <i>Name</i> | <i>E value</i> | <i>Alignment</i> | <i>Motif</i> |
|-------------|----------------|------------------|--------------|
|-------------|----------------|------------------|--------------|

MA0094.1\_Ubx 5.3979e-03

NNAANNNN  
-TAAT---

---

**ceh-5***forward**reverse compliment**Name**E value**Alignment**Motif*

MA0075.1\_Prrx2 3.4502e-03

NNTAATNNN  
--TAATT--

---

**Hoxb5***forward**reverse compliment**Name**E value**Alignment**Motif*

MA0094.1\_Ubx 3.7479e-03

NTNATNNNN  
-TAAT----

---

**Nkx6-3***forward**reverse compliment**Name**E value**Alignment**Motif*

MA0075.1\_Prrx2 3.8618e-03

NNNATNANN  
--AATTA--

---

**Nobox***forward**reverse compliment**Name**E value**Alignment**Motif*

MA0094.1\_Ubx 4.8980e-03

NNYNATNNN  
----ATTA-

---

**Meox1***forward**reverse compliment**Name**E value**Alignment**Motif*

MA0075.1\_Prrx2 4.5297e-03

NTAATKRNN  
-TAATT---

---

**Nanog***forward**reverse compliment**Name**E value**Alignment**Motif*

MA0075.1\_Prrx2 4.5812e-03

NNNATNNNN  
-TAATT---

---

**CBG20882***forward**reverse compliment**Name**E value**Alignment**Motif*

MA0094.1\_Ubx 4.1346e-03

NYNATNNNN  
---ATTA--

---

**Hoxb8***forward**reverse compliment**Name**E value**Alignment**Motif*

MA0094.1\_Ubx 6.4583e-03

NNNNATWNN  
----ATTA-

---

**Hoxb6***forward**reverse compliment**Name**E value**Alignment**Motif*

MA0094.1\_Ubx 2.5913e-03

NNNNNNNN  
TAAT---

---

**Hoxb7***forward**reverse compliment**Name**E value**Alignment**Motif*

MA0094.1\_Ubx 3.4932e-03

NNNNTNNN  
---ATTA-

---

**Hoxd8***forward**reverse compliment**Name**E value**Alignment**Motif*

MA0094.1\_Ubx 4.7931e-03

NNNNNNNN  
---ATTA-

---

**Hoxa7***forward**reverse compliment**Name**E value**Alignment**Motif*

MA0094.1\_Ubx 5.6775e-03

NNWATNNNN  
-TAAT-----

---

**YOX1***forward**reverse compliment**Name**E value**Alignment**Motif*

MA0094.1\_Ubx 1.1609e-02

YNATWWN  
--ATTA-

---

**Hoxa6***forward**reverse compliment**Name**E value**Alignment**Motif*

MA0094.1\_Ubx 3.7532e-03

NNNNATTAN  
----ATTA-

---

**Hoxc8***forward**reverse compliment**Name**E value**Alignment**Motif*

MA0094.1\_Ubx 8.9132e-03

NNNNNNNNNN  
----ATTA--

---

**Barx1***forward**reverse compliment**Name**E value**Alignment**Motif*

MA0094.1\_Ubx 4.4172e-03

NNNNATTANN  
----ATTA--

---

**Hoxa3***forward**reverse compliment**Name**E value**Alignment**Motif*

MA0075.1\_Prrx2 4.2577e-03

NTAATNRNNN  
-TAATT----

---

**Mnx1***forward**reverse compliment**Name**E value**Alignment**Motif*

MA0075.1\_Prrx2 4.4611e-03

NTAATNNNNN  
-TAATT----

---

**ZHD7***forward**reverse compliment**Name**E value**Alignment**Motif*

MA0075.1\_Prrx2 5.0331e-03

NNTAANNNNN  
--TAATT---

---

**Nkx1-1***forward**reverse compliment**Name**E value**Alignment**Motif*

MA0075.1\_Prrx2 4.6337e-03

NNNNATTANN  
---AATTA--

---

**CBG00023***forward**reverse compliment**Name**E value**Alignment**Motif*



MA0094.1\_Ubx 5.4028e-03

NNNNNATWAN  
-----ATTG-

---

**Hmx2***forward**reverse compliment**Name**E value**Alignment**Motif*

MA0426.1\_YHP1 3.6198e-04

NNNCRNTTNN  
---CAATTA-

---

**Hmx1***forward**reverse compliment**Name**E value**Alignment**Motif*

MA0426.1\_YHP1 3.2593e-04

NNNCRNTTNN  
---CAATTA-

---

**Prop1***forward**reverse compliment**Name**E value**Alignment**Motif*

MA0075.1\_Prrx2 1.9940e-03

NNNATYN  
-TAATT-

---

**En1**

|                | <i>forward</i> | <i>reverse compliment</i> |              |
|----------------|----------------|---------------------------|--------------|
| <i>Name</i>    | <i>E value</i> | <i>Alignment</i>          | <i>Motif</i> |
| MA0075.1_Prrx2 | 2.1945e-03     | NNNANNN<br>-TAATT-        |              |

---

**UNCX**

|                | <i>forward</i> | <i>reverse compliment</i> |              |
|----------------|----------------|---------------------------|--------------|
| <i>Name</i>    | <i>E value</i> | <i>Alignment</i>          | <i>Motif</i> |
| MA0075.1_Prrx2 | 1.8805e-03     | NNAATTNN<br>-TAATT--      |              |

---

**Noto**

|             | <i>forward</i> | <i>reverse compliment</i> |              |
|-------------|----------------|---------------------------|--------------|
| <i>Name</i> | <i>E value</i> | <i>Alignment</i>          | <i>Motif</i> |

MA0075.1\_Prrx2 6.3461e-03

NNNNATNNNN  
---AATTA--

---

**yox1***forward**reverse compliment**Name**E value**Alignment**Motif*

MA0075.1\_Prrx2 7.7965e-03

NNNNATNNNN  
--TAATT---

---

**Q0N4H7\_NEMVE***forward**reverse compliment**Name**E value**Alignment**Motif*

MA0094.1\_Ubx 2.9184e-02

NNNNNATNNN  
-----ATTA-

---

**NOBOX***forward**reverse compliment**Name**E value**Alignment**Motif*

MA0426.1\_YHP1 3.2827e-02

NNYNATNNNN  
--CAATTA--

---

**CG15696***forward**reverse compliment**Name**E value**Alignment**Motif*

MA0426.1\_YHP1 2.0724e-02

NNYAATNNN  
--CAATTA--

---

**CG34031***forward**reverse compliment**Name**E value**Alignment**Motif*

MA0426.1\_YHP1 2.0324e-02

NYNNNNNN  
-CAATTA-

---

**NEMVEDRAFT\_v1g80394***forward**reverse compliment**Name**E value**Alignment**Motif*

MA0426.1\_YHP1 1.3574e-02

NNNNATNNN  
--CAATTA--

---

**pha-2**

| <i>forward</i> |                | <i>reverse compliment</i> |              |
|----------------|----------------|---------------------------|--------------|
| <i>Name</i>    | <i>E value</i> | <i>Alignment</i>          | <i>Motif</i> |
| MA0426.1_YHP1  | 4.0154e-02     | NNNNNATNNN<br>---CAATTA-  |              |

---

**Hoxb9**

| <i>forward</i> |                | <i>reverse compliment</i> |              |
|----------------|----------------|---------------------------|--------------|
| <i>Name</i>    | <i>E value</i> | <i>Alignment</i>          | <i>Motif</i> |
| MA0165.1_Abd-B | 1.0286e-03     | NNNNRTWAAN<br>--TMATAAA-  |              |

---

**CBG23031**

| <i>forward</i> |                | <i>reverse compliment</i> |              |
|----------------|----------------|---------------------------|--------------|
| <i>Name</i>    | <i>E value</i> | <i>Alignment</i>          | <i>Motif</i> |

MA0174.1\_CG42234 8.4823e-04

NNNNATWAAN  
--TMATWAA-**Hoxc11***forward**reverse compliment**Name**E value**Alignment**Motif*

MA0165.1\_Abd-B 2.3036e-03

NNNNRTWAAN  
--TMATAAA-**Hoxc13***forward**reverse compliment**Name**E value**Alignment**Motif*

MA0165.1\_Abd-B 1.2421e-03

NNNNRTAAAN  
--TMATAAA-**Hoxb13***forward**reverse compliment**Name**E value**Alignment**Motif*

MA0165.1\_Abd-B 1.5614e-03

NNNNRTWAAN  
--TMATAAA-

---

**Hoxa13**

| <i>forward</i> |                | <i>reverse compliment</i> |              |
|----------------|----------------|---------------------------|--------------|
| <i>Name</i>    | <i>E value</i> | <i>Alignment</i>          | <i>Motif</i> |
| MA0165.1_Abd-B | 9.6505e-04     | NNNRTWAAN<br>-TMATAAA-    |              |

---

**HOXC13**

| <i>forward</i> |                | <i>reverse compliment</i>  |              |
|----------------|----------------|----------------------------|--------------|
| <i>Name</i>    | <i>E value</i> | <i>Alignment</i>           | <i>Motif</i> |
| MA0216.1_cad   | 1.0465e-08     | NSCAATAAAAN<br>--YAATAAA-- |              |

---

**HOXA13**

| <i>forward</i> |                | <i>reverse compliment</i> |              |
|----------------|----------------|---------------------------|--------------|
| <i>Name</i>    | <i>E value</i> | <i>Alignment</i>          | <i>Motif</i> |

MA0216.1\_cad 2.1130e-08

GTTTTATTGGN  
--TTTATTTR--

---

**HOXD13***forward**reverse compliment**Name**E value**Alignment**Motif*

MA0216.1\_cad 3.3250e-08

SSCAATAAAMC  
--YAATAAA--

---

**HOXB13***forward**reverse compliment**Name**E value**Alignment**Motif*

MA0216.1\_cad 1.6334e-08

NCCAATAAAAN  
--YAATAAA--

---

**Hoxd13***forward**reverse compliment**Name**E value**Alignment**Motif*

MA0216.1\_cad 3.4315e-10

SYAATAAAAN  
-YAATAAA--



---

**Hoxd9**

| <i>forward</i> |                | <i>reverse compliment</i> |              |
|----------------|----------------|---------------------------|--------------|
| <i>Name</i>    | <i>E value</i> | <i>Alignment</i>          | <i>Motif</i> |
| MA0165.1_Abd-B | 4.1215e-07     | NCCATWAAA<br>-TMATAAA-    |              |

---

**HOXC12**

| <i>forward</i> |                | <i>reverse compliment</i>  |              |
|----------------|----------------|----------------------------|--------------|
| <i>Name</i>    | <i>E value</i> | <i>Alignment</i>           | <i>Motif</i> |
| MA0216.1_cad   | 4.7854e-09     | NGTAATAAAAN<br>--YAATAAA-- |              |

---

**hoxd13a**

| <i>forward</i> |                | <i>reverse compliment</i> |              |
|----------------|----------------|---------------------------|--------------|
| <i>Name</i>    | <i>E value</i> | <i>Alignment</i>          | <i>Motif</i> |

MA0216.1\_cad 8.3883e-11

TMATAAAW  
YAATAAA-

---

**cad***forward**reverse compliment**Name**E value**Alignment**Motif*

MA0216.1\_cad 2.2162e-08

NNGCMATAAAAN  
---YAATAAA--

---

**HOXD9***forward**reverse compliment**Name**E value**Alignment**Motif*

MA0216.1\_cad 6.3975e-10

GCAATAAAAN  
-YAATAAA--

---

**HOXD10***forward**reverse compliment**Name**E value**Alignment**Motif*

MA0216.1\_cad 5.7397e-10

GYMATAAAAN  
-YAATAAA--

---

**CDX1***forward**reverse compliment**Name**E value**Alignment**Motif*

MA0216.1\_cad

1.0263e-07

NTTTTATGGCN  
--TTTATTR--

---

**HOXC10***forward**reverse compliment**Name**E value**Alignment**Motif*

MA0216.1\_cad

2.9939e-09

NNTTTATKRCN  
--TTTATTR--

---

**ceh-90***forward**reverse compliment**Name**E value**Alignment**Motif*

MA0393.1\_STE12 1.3427e-03

NGTTTTANN  
YGTTTCA--

---

**HOXB9***forward**reverse compliment**Name**E value**Alignment**Motif*

MA0165.1\_Abd-B 2.2251e-06

GTCGTAAAAN  
-TMATAAA--

---

**Hoxc10***forward**reverse compliment**Name**E value**Alignment**Motif*

MA0165.1\_Abd-B 2.4823e-08

NTTTTAYGAC  
--TTTATKA-

---

**Abd-B***forward**reverse compliment**Name**E value**Alignment**Motif*

MA0165.1\_Abd-B 1.4554e-06

NGTCGTAAAWN  
--TMATAAA--

---

**HOXA10***forward**reverse compliment**Name**E value**Alignment**Motif*

MA0165.1\_Abd-B 7.2371e-06

NTTTTACGACN  
--TTTATKA--

---

**HOXA11***forward**reverse compliment**Name**E value**Alignment**Motif*

MA0165.1\_Abd-B 2.0449e-05

NGTCGTAAAAAN  
--TMATAAA--

---

**Hoxa11***forward**reverse compliment**Name**E value**Alignment**Motif*

MA0165.1\_Abd-B 6.8791e-06

NNTCGTAAANNN  
--TMATAAA---

---

**HOXD11***forward**reverse compliment*

| <i>Name</i>    | <i>E value</i> | <i>Alignment</i>                     | <i>Motif</i> |
|----------------|----------------|--------------------------------------|--------------|
| MA0153.1_HNF1B | 2.3770e-05     | NRTC GTAAANNNTWAN<br>----GTAAWYATTAA |              |

---

**HOXC11***forward**reverse compliment*

| <i>Name</i>    | <i>E value</i> | <i>Alignment</i>           | <i>Motif</i> |
|----------------|----------------|----------------------------|--------------|
| MA0165.1_Abd-B | 6.4582e-06     | NNTTTACGAYN<br>--TTTATKA-- |              |

---

**HOXD12***forward**reverse compliment*

| <i>Name</i>    | <i>E value</i> | <i>Alignment</i>          | <i>Motif</i> |
|----------------|----------------|---------------------------|--------------|
| MA0165.1_Abd-B | 1.5126e-05     | NRTC GTAAAN<br>--TMATAAA- |              |

---

**HOXA9**

|                |                | <i>forward</i>               | <i>reverse compliment</i> |
|----------------|----------------|------------------------------|---------------------------|
| <i>Name</i>    | <i>E value</i> | <i>Alignment</i>             | <i>Motif</i>              |
| MA0165.1_Abd-B | 4.9453e-07     | NNNTTTAYGAYN<br>---TTTATKA-- |                           |

---

**CDX2**

|                |                | <i>forward</i>           | <i>reverse compliment</i> |
|----------------|----------------|--------------------------|---------------------------|
| <i>Name</i>    | <i>E value</i> | <i>Alignment</i>         | <i>Motif</i>              |
| MA0165.1_Abd-B | 1.8242e-04     | NRTYRTAANN<br>--TMATAAA- |                           |

---

**Hoxc12**

|                 |                | <i>forward</i>           | <i>reverse compliment</i> |
|-----------------|----------------|--------------------------|---------------------------|
| <i>Name</i>     | <i>E value</i> | <i>Alignment</i>         | <i>Motif</i>              |
| MA0151.1_ARID3A | 3.9486e-02     | NNTWAYNNNN<br>-TTTAAT--- |                           |

---

**Hoxd12\_CONSTRUCT**

|                 |                | <i>forward</i>           | <i>reverse compliment</i> |
|-----------------|----------------|--------------------------|---------------------------|
| <i>Name</i>     | <i>E value</i> | <i>Alignment</i>         | <i>Motif</i>              |
| MA0151.1_ARID3A | 4.2453e-02     | NNTNAYNNNN<br>-TTTAAT--- |                           |

---

**B-H2**

|               |                | <i>forward</i>           | <i>reverse compliment</i> |
|---------------|----------------|--------------------------|---------------------------|
| <i>Name</i>   | <i>E value</i> | <i>Alignment</i>         | <i>Motif</i>              |
| MA0168.1_B-H1 | 3.6424e-04     | NNCGTTTANN<br>--CAATTAA- |                           |

---

**B-H1**

|             |                | <i>forward</i>   | <i>reverse compliment</i> |
|-------------|----------------|------------------|---------------------------|
| <i>Name</i> | <i>E value</i> | <i>Alignment</i> | <i>Motif</i>              |



MA0168.1\_B-H1 3.8028e-04

NNCGTTTANN  
--CAATTAA--

---

**BARHL1***forward**reverse compliment**Name**E value**Alignment**Motif*

MA0168.1\_B-H1 5.0670e-05

NCGTTTAN  
-CAATTAA

---

**Barhl1***forward**reverse compliment**Name**E value**Alignment**Motif*

MA0168.1\_B-H1 2.9661e-04

NNCRTTTANN  
--CAATTAA--

---

**Q0N4H2\_NEMVE***forward**reverse compliment**Name**E value**Alignment**Motif*

MA0188.1\_Dr 5.7239e-10

TAATTRNT  
TAATTGG-**NEMVEDRAFT\_v1g114268***forward**reverse compliment*

| <i>Name</i> | <i>E value</i> | <i>Alignment</i>       | <i>Motif</i> |
|-------------|----------------|------------------------|--------------|
| MA0188.1_Dr | 6.9261e-05     | NTAATNGRT<br>-TAATTGG- |              |

**NK7.1***forward**reverse compliment*

| <i>Name</i>      | <i>E value</i> | <i>Alignment</i>              | <i>Motif</i> |
|------------------|----------------|-------------------------------|--------------|
| MA0054.1_myb.Ph3 | 5.3691e-06     | -NACCGTTTAAAN<br>TAACNGTTW--- |              |

**BARHL2***forward**reverse compliment*

| <i>Name</i>      | <i>E value</i> | <i>Alignment</i>           | <i>Motif</i> |
|------------------|----------------|----------------------------|--------------|
| MA0054.1_myb.Ph3 | 6.5933e-07     | NTAAACGNT--<br>--WAACNGTTA |              |

---

**Hoxa10**

| <i>forward</i> |                | <i>reverse compliment</i> |              |
|----------------|----------------|---------------------------|--------------|
| <i>Name</i>    | <i>E value</i> | <i>Alignment</i>          | <i>Motif</i> |
| MA0307.1_GLN3  | 8.7847e-03     | NNNNNTNNN<br>---GATAA-    |              |

---

**Hoxa9**

| <i>forward</i> |                | <i>reverse compliment</i> |              |
|----------------|----------------|---------------------------|--------------|
| <i>Name</i>    | <i>E value</i> | <i>Alignment</i>          | <i>Motif</i> |
| MA0307.1_GLN3  | 6.1601e-03     | NNNNNNNN<br>-TTATC--      |              |

---

**Hoxd10**

| <i>forward</i> |                | <i>reverse compliment</i> |              |
|----------------|----------------|---------------------------|--------------|
| <i>Name</i>    | <i>E value</i> | <i>Alignment</i>          | <i>Motif</i> |

MA0307.1\_GLN3 4.1907e-03

NNNNNNNN  
-TTATC--

---

**Hoxd11***forward**reverse compliment**Name**E value**Alignment**Motif*

MA0307.1\_GLN3 1.4126e-02

NNNNNNNN  
-TTATC--

---

**Cdx2***forward**reverse compliment**Name**E value**Alignment**Motif*

MA0307.1\_GLN3 8.2090e-03

NWWATNRNN  
-TTATC---

---

**Cdx1***forward**reverse compliment**Name**E value**Alignment**Motif*

MA0307.1\_GLN3 7.8786e-03

NNWATNRNN  
-TTATC---

---

**BSX**

| <i>forward</i> |                | <i>reverse compliment</i> |              |
|----------------|----------------|---------------------------|--------------|
| <i>Name</i>    | <i>E value</i> | <i>Alignment</i>          | <i>Motif</i> |
| MA0217.1_caup  | 4.8362e-03     | NNCGTTAN<br>--TGTTA-      |              |

---

**PRRX2**

| <i>forward</i> |                | <i>reverse compliment</i> |              |
|----------------|----------------|---------------------------|--------------|
| <i>Name</i>    | <i>E value</i> | <i>Alignment</i>          | <i>Motif</i> |
| MA0186.1_Dfd   | 2.6340e-03     | NNCRTNAN<br>-TCATTAA      |              |

---

**HMBOX1**

| <i>forward</i> |                | <i>reverse compliment</i> |              |
|----------------|----------------|---------------------------|--------------|
| <i>Name</i>    | <i>E value</i> | <i>Alignment</i>          | <i>Motif</i> |

MA0231.1\_lbe 4.3822e-07

NTAACTAGN  
-TAAAYNA--

---

**lbe***forward**reverse compliment**Name**E value**Alignment**Motif*

MA0186.1\_Dfd

4.2043e-04

NNTCGTTA-  
--TCATTAA

---

**LBX2***forward**reverse compliment**Name**E value**Alignment**Motif*

MA0186.1\_Dfd

5.8346e-08

CTCRTTAA  
-TCATTAA

---

**Hnf1b***forward**reverse compliment**Name**E value**Alignment**Motif*

MA0217.1\_caup 4.2044e-03

NNNGTNNN  
--TGTTA-

---

**Hnfla***forward**reverse compliment**Name**E value**Alignment**Motif*

MA0217.1\_caup 2.6865e-03

NNNGTTAN  
--TGTTA-

---

**ceh-57***forward**reverse compliment**Name**E value**Alignment**Motif*

MA0217.1\_caup 6.2734e-03

NNNNNTWAN  
---TGTTA-

---

**Hmbox1***forward**reverse compliment**Name**E value**Alignment**Motif*

MA0231.1\_lbe 9.7179e-02

NNNACNNN  
-TAAyna-

---

**MTR\_2g038000***forward**reverse compliment*

| <i>Name</i> | <i>E value</i> | <i>Alignment</i> | <i>Motif</i> |
|-------------|----------------|------------------|--------------|
|-------------|----------------|------------------|--------------|

MA0132.1\_Pdx1 2.8654e-02

NNNNNAGNNN  
-AATTAG---

---

**ceh-24***forward**reverse compliment*

| <i>Name</i> | <i>E value</i> | <i>Alignment</i> | <i>Motif</i> |
|-------------|----------------|------------------|--------------|
|-------------|----------------|------------------|--------------|

MA0211.1\_bap 5.8321e-02

NNYNCTYNN  
--CACTTAA

---

**ENSCING00000007395***forward**reverse compliment*

| <i>Name</i> | <i>E value</i> | <i>Alignment</i> | <i>Motif</i> |
|-------------|----------------|------------------|--------------|
|-------------|----------------|------------------|--------------|



MA0211.1\_bap 3.0174e-02

NWNNNNNN  
CACTTAA-

---

**ceh-22***forward**reverse compliment**Name**E value**Alignment**Motif*

MA0211.1\_bap 4.4240e-08

NNNCACTTNA  
---CACTTAA

---

**vnd***forward**reverse compliment**Name**E value**Alignment**Motif*

MA0253.1\_vnd 1.1102e-16

YACTTGARA  
YACTTGARA

---

**tin***forward**reverse compliment**Name**E value**Alignment**Motif*

MA0264.1\_ceh-22 3.1586e-09

NCCAATTGAN-  
NCCAATTGANN

---

**bap**

| <i>forward</i> |                | <i>reverse compliment</i> |              |
|----------------|----------------|---------------------------|--------------|
| <i>Name</i>    | <i>E value</i> | <i>Alignment</i>          | <i>Motif</i> |
| MA0211.1_bap   | 2.1113e-06     | NNCAATTANN<br>--CACTTAA-  |              |

---

**ISL1**

| <i>forward</i> |                | <i>reverse compliment</i> |              |
|----------------|----------------|---------------------------|--------------|
| <i>Name</i>    | <i>E value</i> | <i>Alignment</i>          | <i>Motif</i> |
| MA0211.1_bap   | 7.7296e-07     | SCAATTAN<br>-CACTTAA      |              |

---

**ISL2**

| <i>forward</i> |                | <i>reverse compliment</i> |              |
|----------------|----------------|---------------------------|--------------|
| <i>Name</i>    | <i>E value</i> | <i>Alignment</i>          | <i>Motif</i> |
| MA0211.1_bap   | 6.2608e-07     | NCAATTAN<br>-CACTTAA      |              |

---

**HMX1**

| <i>forward</i>  |                | <i>reverse compliment</i> |              |
|-----------------|----------------|---------------------------|--------------|
| <i>Name</i>     | <i>E value</i> | <i>Alignment</i>          | <i>Motif</i> |
| MA0063.1_Nkx2-5 | 2.2710e-06     | NCAMTTANN<br>-CAMTTAW-    |              |

---

**HMX2**

| <i>forward</i> |                | <i>reverse compliment</i> |              |
|----------------|----------------|---------------------------|--------------|
| <i>Name</i>    | <i>E value</i> | <i>Alignment</i>          | <i>Motif</i> |
| MA0211.1_bap   | 1.1516e-08     | NCACTTRNC<br>-CACTTAA-    |              |

---

**NKX3-2**

| <i>forward</i> |                | <i>reverse compliment</i> |              |
|----------------|----------------|---------------------------|--------------|
| <i>Name</i>    | <i>E value</i> | <i>Alignment</i>          | <i>Motif</i> |

MA0211.1\_bap 2.0976e-06

NCCACTTANN  
--CACTTAA-

---

**NKX3-1***forward**reverse compliment**Name**E value**Alignment**Motif*

MA0211.1\_bap 2.0256e-06

NNTAAGTGGN  
-TTAAGTG--

---

**Nkx2-6***forward**reverse compliment**Name**E value**Alignment**Motif*

MA0211.1\_bap 7.4956e-04

NNNCACTTNN  
---CACTTAA

---

**NKX2-3***forward**reverse compliment**Name**E value**Alignment**Motif*

MA0211.1\_bap 1.0660e-03

NNCACTTNNN  
--CACTTAA-

---

**Nkx2-9***forward**reverse compliment**Name**E value**Alignment**Motif*

MA0211.1\_bap 1.9645e-03

NNRAGTRNNN  
TTAAGTG---

---

**Nkx2-3***forward**reverse compliment**Name**E value**Alignment**Motif*

MA0211.1\_bap 9.1394e-04

NNRAGNRNN  
TTAAGTG--

---

**Nkx2-1***forward**reverse compliment**Name**E value**Alignment**Motif*

MA0211.1\_bap 9.7504e-04

NYNCTYNN  
-CACTTAA

---

**NKX2-5***forward**reverse compliment**Name**E value**Alignment**Motif*

MA0211.1\_bap

7.6109e-05

NNAAGWR  
TTAAGTG

---

**NKX2-8***forward**reverse compliment**Name**E value**Alignment**Motif*

MA0211.1\_bap

2.4048e-03

NYNCTYNN  
-CACTTAA

---

**Nkx2-2***forward**reverse compliment**Name**E value**Alignment**Motif*

MA0211.1\_bap 2.2528e-03

NYNCTYNNN  
-CACTTAA-

---

**Nkx3-2***forward**reverse compliment**Name**E value**Alignment**Motif*

MA0211.1\_bap

6.6546e-04

NNYACTTNN  
--CACTTAA

---

**scro***forward**reverse compliment**Name**E value**Alignment**Motif*

MA0211.1\_bap

1.4217e-03

NCACTYNNN  
-CACTTAA-

---

**Nkx2-5***forward**reverse compliment**Name**E value**Alignment**Motif*

MA0211.1\_bap 1.5526e-03

NNYNCTYNNN  
--CACTTAA-

---

**Nkx2-4***forward**reverse compliment**Name**E value**Alignment**Motif*

MA0211.1\_bap 2.2018e-03

NNRAGNRNNN  
TTAAGTG---

---

**Nkx3-1***forward**reverse compliment**Name**E value**Alignment**Motif*

MA0211.1\_bap 8.3180e-04

NNNCACTTNN  
---CACTTAA

---

**Q70HR3\_PLEPI***forward**reverse compliment**Name**E value**Alignment**Motif*



MA0124.1\_NKX3-1 1.7532e-06

NTAAGTANNN  
-TAAGTAT--

---

**Six6**

| <i>forward</i> |                | <i>reverse compliment</i> |              |
|----------------|----------------|---------------------------|--------------|
| <i>Name</i>    | <i>E value</i> | <i>Alignment</i>          | <i>Motif</i> |
| MA0246.1_so    | 1.1002e-02     | NNKATNN<br>-GTATCA        |              |

---

**six3**

| <i>forward</i> |                | <i>reverse compliment</i> |              |
|----------------|----------------|---------------------------|--------------|
| <i>Name</i>    | <i>E value</i> | <i>Alignment</i>          | <i>Motif</i> |
| MA0246.1_so    | 5.1282e-02     | NNNATMNNNN<br>-TGATAC---  |              |

---

**XP\_003689450.1**

| <i>forward</i> |                | <i>reverse compliment</i> |              |
|----------------|----------------|---------------------------|--------------|
| <i>Name</i>    | <i>E value</i> | <i>Alignment</i>          | <i>Motif</i> |

MA0036.1\_GATA2 5.8039e-02

NNNGKNTNNN  
---NGATN--

---

**SIX6**

|                |                | <i>forward</i>           | <i>reverse compliment</i> |              |
|----------------|----------------|--------------------------|---------------------------|--------------|
| <i>Name</i>    | <i>E value</i> | <i>Alignment</i>         |                           | <i>Motif</i> |
| MA0199.1_Optix | 1.5619e-05     | NNNTATCRNN<br>---TATCA-- |                           |              |

---

**SIX3**

|             |                | <i>forward</i>           | <i>reverse compliment</i> |              |
|-------------|----------------|--------------------------|---------------------------|--------------|
| <i>Name</i> | <i>E value</i> | <i>Alignment</i>         |                           | <i>Motif</i> |
| MA0246.1_so | 4.5416e-07     | NNNTATCRNN<br>--GTATCA-- |                           |              |

---

**Six3**

|                |                | <i>forward</i>     | <i>reverse compliment</i> |              |
|----------------|----------------|--------------------|---------------------------|--------------|
| <i>Name</i>    | <i>E value</i> | <i>Alignment</i>   |                           | <i>Motif</i> |
| MA0199.1_Optix | 3.4735e-03     | NKATNNN<br>-TATCA- |                           |              |

---

**PRH\_PETCR**

|                |                | <i>forward</i>                              | <i>reverse compliment</i> |              |
|----------------|----------------|---------------------------------------------|---------------------------|--------------|
| <i>Name</i>    | <i>E value</i> | <i>Alignment</i>                            |                           | <i>Motif</i> |
| MA0345.1_NHP6A | 4.6352e-09     | -----TWATATAT-----<br>NNNNNNTTATATANNRNNNNN |                           |              |

---

**NCU09556**

|               |                | <i>forward</i>       | <i>reverse compliment</i> |              |
|---------------|----------------|----------------------|---------------------------|--------------|
| <i>Name</i>   | <i>E value</i> | <i>Alignment</i>     |                           | <i>Motif</i> |
| MA0379.1_SIG1 | 2.9552e-06     | TTAATATA<br>---ATATA |                           |              |

---

**hbx2**

|             |                | <i>forward</i>   | <i>reverse compliment</i> |              |
|-------------|----------------|------------------|---------------------------|--------------|
| <i>Name</i> | <i>E value</i> | <i>Alignment</i> |                           | <i>Motif</i> |
|             |                |                  |                           |              |

MA0379.1\_SIG1 6.3617e-06

NNATATATWN  
---TATAT--

---

**KLLA0\_D10043g***forward**reverse compliment**Name**E value**Alignment**Motif*

MA0379.1\_SIG1 8.4022e-03

NNNNNNNNNN  
--TATAT---

---

**NEMVEDRAFT\_v1g81436***forward**reverse compliment**Name**E value**Alignment**Motif*

MA0216.1\_cad 9.7454e-02

NNNNNANNNN  
---YAATAAA

---

**Pknox1***forward**reverse compliment**Name**E value**Alignment**Motif*

MA0227.1\_hth 7.0473e-03

NNNTGTCN  
--CTGTCA

---

**unc-62***forward**reverse compliment**Name**E value**Alignment**Motif*

MA0207.1\_achi 1.5344e-02

NNNTNTNNN  
--CTGTCA-

---

**ATEG\_00670***forward**reverse compliment**Name**E value**Alignment**Motif*

MA0227.1\_hth 3.4042e-02

NNNGTNNNN  
-CTGTCA--

---

**IRX2***forward**reverse compliment**Name**E value**Alignment**Motif*

MA0207.1\_achi 6.9992e-04

NNTGTCRTGTWN  
-CTGTCA-----

---

**vis***forward**reverse compliment**Name**E value**Alignment**Motif*

MA0252.1\_vis

8.8622e-07

NTGTCA  
NTGTCA

---

**achi***forward**reverse compliment**Name**E value**Alignment**Motif*

MA0252.1\_vis

8.7480e-07

NTGTCA  
NTGTCA

---

**Meis2***forward**reverse compliment**Name**E value**Alignment**Motif*

MA0252.1\_vis 6.4391e-06

NTGTCAN  
NTGTCA-

---

**MEIS1***forward**reverse compliment**Name**E value**Alignment**Motif*

MA0252.1\_vis

6.6419e-06

NTGACAN  
-TGACAN

---

**Meis3***forward**reverse compliment**Name**E value**Alignment**Motif*

MA0227.1\_hth

6.6077e-06

NTGTCAN  
CTGTCA-

---

**hbz9***forward**reverse compliment**Name**E value**Alignment**Motif*

MA0288.1\_CUP9

9.3246e-06

---NTGTCANN  
WWTGTGTCA--

---

**CUP9**

| <i>forward</i> |                | <i>reverse compliment</i> |              |
|----------------|----------------|---------------------------|--------------|
| <i>Name</i>    | <i>E value</i> | <i>Alignment</i>          | <i>Motif</i> |
| MA0288.1_CUP9  | 3.7091e-11     | NWTGTGTCAN<br>WWTGTGTCA-  |              |

---

**exd**

| <i>forward</i> |                | <i>reverse compliment</i> |              |
|----------------|----------------|---------------------------|--------------|
| <i>Name</i>    | <i>E value</i> | <i>Alignment</i>          | <i>Motif</i> |
| MA0222.1_exd   | 2.5740e-10     | TGTCAAAN<br>TGTCAAAN      |              |

---

**Meis1**

| <i>forward</i> |                | <i>reverse compliment</i> |              |
|----------------|----------------|---------------------------|--------------|
| <i>Name</i>    | <i>E value</i> | <i>Alignment</i>          | <i>Motif</i> |



MA0252.1\_vis 4.1357e-05

NNNTGTCAN  
--NTGTCA--

---

**Tgif2***forward**reverse compliment**Name**E value**Alignment**Motif*

MA0227.1\_hth

6.9961e-05

NNNTGTCANN  
--CTGTCA--

---

**Tgif1***forward**reverse compliment**Name**E value**Alignment**Motif*

MA0227.1\_hth

6.8698e-05

NNNTGTCANN  
--CTGTCA--

---

**hbx4***forward**reverse compliment**Name**E value**Alignment**Motif*

MA0227.1\_hth

1.0419e-04

NNNYGTCANN  
--CTGTCA--

---

**CAGL0H02959g**

| <i>forward</i> |                | <i>reverse compliment</i> |              |
|----------------|----------------|---------------------------|--------------|
| <i>Name</i>    | <i>E value</i> | <i>Alignment</i>          | <i>Motif</i> |
| MA0227.1_hth   | 1.1990e-04     | NNNYGTCANN<br>--CTGTCA--  |              |

---

**ANIA\_00885**

| <i>forward</i> |                | <i>reverse compliment</i> |              |
|----------------|----------------|---------------------------|--------------|
| <i>Name</i>    | <i>E value</i> | <i>Alignment</i>          | <i>Motif</i> |
| MA0207.1_achi  | 1.9445e-04     | NNNTGTMANN<br>--CTGTCA--  |              |

---

**GRMZM2G087741**

| <i>forward</i> |                | <i>reverse compliment</i> |              |
|----------------|----------------|---------------------------|--------------|
| <i>Name</i>    | <i>E value</i> | <i>Alignment</i>          | <i>Motif</i> |

MA0227.1\_hth 1.3141e-06

NGMYGTCANN  
--CTGTCA--

---

**GRMZM2G135447***forward**reverse compliment**Name**E value**Alignment**Motif*

MA0227.1\_hth

5.9773e-09

SMYGTCAN  
-CTGTCA-

---

**CBG24578***forward**reverse compliment**Name**E value**Alignment**Motif*

MA0207.1\_achi

1.4139e-07

NNNTGACAGSTN  
---TGACAG---

---

**TGIF2***forward**reverse compliment**Name**E value**Alignment**Motif*

MA0227.1\_hth 3.1704e-07

TGACANNTGTCA  
-----CTGTCA

---

**TGIF1***forward**reverse compliment**Name**E value**Alignment**Motif*

MA0207.1\_achi 1.8587e-07

TGACAGCTGTCA  
-----CTGTCA

---

**MEIS2***forward**reverse compliment**Name**E value**Alignment**Motif*

MA0207.1\_achi 3.0941e-07

TGACAGCTGTCA  
TGACAG-----

---

**PKNOX1***forward**reverse compliment**Name**E value**Alignment**Motif*

MA0227.1\_hth 5.8002e-07

TGACASSTGTCA  
-----CTGTCA

---

**PKNOX2***forward**reverse compliment**Name**E value**Alignment**Motif*

MA0227.1\_hth 5.7190e-07

TGACANNTGTCA  
-----CTGTCA

---

**TGIF2LY***forward**reverse compliment**Name**E value**Alignment**Motif*

MA0227.1\_hth 3.0965e-07

TGACANNTGTCA  
-----CTGTCA

---

**TGIF2LX***forward**reverse compliment**Name**E value**Alignment**Motif*

MA0227.1\_hth 2.5463e-07

TGACANCTGTCA  
-----CTGTCA

---

**Pknox2***forward**reverse compliment**Name**E value**Alignment**Motif*

MA0207.1\_achi 1.0777e-07

TGACAGGTGTCA  
TGACAG-----

---

**IRX5***forward**reverse compliment**Name**E value**Alignment**Motif*

MA0328.1\_MATALPHA2 3.9553e-05

NNNTGTNNNACAYNN  
-----AATTACATG-

---

**caup***forward**reverse compliment**Name**E value**Alignment**Motif*

MA0217.1\_caup 1.6159e-06

TGTTANWN  
TGTTA---

---

**CG11617***forward**reverse compliment*

| <i>Name</i>      | <i>E value</i> | <i>Alignment</i>       | <i>Motif</i> |
|------------------|----------------|------------------------|--------------|
| MA0173.1_CG11617 | 1.4526e-07     | -TGTWAAAW<br>ATGTWAA-- |              |

---

**Rhox8***forward**reverse compliment*

| <i>Name</i>   | <i>E value</i> | <i>Alignment</i>       | <i>Motif</i> |
|---------------|----------------|------------------------|--------------|
| MA0392.1_STB5 | 2.3740e-05     | NTTACACCN<br>-TANNNCCG |              |

---

**ara***forward**reverse compliment*

| <i>Name</i> | <i>E value</i> | <i>Alignment</i> | <i>Motif</i> |
|-------------|----------------|------------------|--------------|
|-------------|----------------|------------------|--------------|

MA0210.1\_ara 1.6159e-06

TGTTWTNN  
TGTTW---

---

**AGAP009986***forward**reverse compliment**Name**E value**Alignment**Motif*

MA0210.1\_ara 2.8411e-02

NNNNTGTNNN  
----TGTTW-

---

**Irx5***forward**reverse compliment**Name**E value**Alignment**Motif*

MA0210.1\_ara 1.3053e-02

NNTGTNNNN  
--TGTTW--

---

**Irx6***forward**reverse compliment**Name**E value**Alignment**Motif*



MA0210.1\_ara 5.7942e-03

NTNTNNN  
-TGTTW-

---

**Irx2***forward**reverse compliment**Name**E value**Alignment**Motif*

MA0210.1\_ara

1.6628e-02

NNNTGTNNN  
---TGTTW-

---

**Rhox11***forward**reverse compliment**Name**E value**Alignment**Motif*

MA0210.1\_ara

2.0801e-02

NNNTGTWNNN  
---TGTTW--

---

**SNAPOd2T00005194001***forward**reverse compliment**Name**E value**Alignment**Motif*

MA0328.1\_MATALPHA2 1.7656e-04

-NNTACATGTNN  
AATTACATG---

---

**ATHB-4**

|              |                | <i>forward</i>             | <i>reverse compliment</i> |              |
|--------------|----------------|----------------------------|---------------------------|--------------|
| <i>Name</i>  | <i>E value</i> | <i>Alignment</i>           |                           | <i>Motif</i> |
| MA0254.1_vv1 | 8.1236e-04     | NNYATGCAKNN<br>--TATKCA--- |                           |              |

---

**PK24181.1**

|              |                | <i>forward</i>              | <i>reverse compliment</i> |              |
|--------------|----------------|-----------------------------|---------------------------|--------------|
| <i>Name</i>  | <i>E value</i> | <i>Alignment</i>            |                           | <i>Motif</i> |
| MA0227.1_hth | 4.3791e-02     | NNNNNNNNNN--<br>-----CTGTCA |                           |              |

---

**pbx4**

|             |                | <i>forward</i>   | <i>reverse compliment</i> |              |
|-------------|----------------|------------------|---------------------------|--------------|
| <i>Name</i> | <i>E value</i> | <i>Alignment</i> |                           | <i>Motif</i> |
|             |                |                  |                           |              |

MA0235.1\_onecut 3.6885e-04

NNCATCAA  
-NAATCAA

---

**TVAG\_451170**

|             | <i>forward</i> | <i>reverse compliment</i> |              |
|-------------|----------------|---------------------------|--------------|
| <i>Name</i> | <i>E value</i> | <i>Alignment</i>          | <i>Motif</i> |
| MA0246.1_so | 1.2975e-03     | NNCRCATCAN<br>---GTATCA-  |              |

---

**TOS8**

|                | <i>forward</i> | <i>reverse compliment</i>  |              |
|----------------|----------------|----------------------------|--------------|
| <i>Name</i>    | <i>E value</i> | <i>Alignment</i>           | <i>Motif</i> |
| MA0018.2_CREB1 | 8.6372e-07     | WKACGTCANNN<br>TGACGTCA--- |              |

---

**PBX4**

|               | <i>forward</i> | <i>reverse compliment</i> |              |
|---------------|----------------|---------------------------|--------------|
| <i>Name</i>   | <i>E value</i> | <i>Alignment</i>          | <i>Motif</i> |
| MA0204.1_Six4 | 3.4604e-02     | NNNNNTNNNN<br>--GTNTCA--  |              |

---

**CBG10835**

| <i>forward</i> |                | <i>reverse compliment</i> |              |
|----------------|----------------|---------------------------|--------------|
| <i>Name</i>    | <i>E value</i> | <i>Alignment</i>          | <i>Motif</i> |
| MA0199.1_Optix | 1.5682e-02     | NNNNTCANN<br>--TATCA--    |              |

---

**Phyra73700**

| <i>forward</i> |                | <i>reverse compliment</i> |              |
|----------------|----------------|---------------------------|--------------|
| <i>Name</i>    | <i>E value</i> | <i>Alignment</i>          | <i>Motif</i> |
| MA0199.1_Optix | 1.5829e-02     | NNNNNNTCAN<br>----TATCA-  |              |

---

**KNAT6**

| <i>forward</i> |                | <i>reverse compliment</i> |              |
|----------------|----------------|---------------------------|--------------|
| <i>Name</i>    | <i>E value</i> | <i>Alignment</i>          | <i>Motif</i> |

MA0207.1\_achi 1.6623e-02

NNNNGTCNNN  
--CTGTCA--

---

**Q0ZPQ8\_NEMVE***forward**reverse compliment**Name**E value**Alignment**Motif*

MA0207.1\_achi 1.1053e-02

NTGACRNNN  
-TGACAG--

---

**RLT1***forward**reverse compliment**Name**E value**Alignment**Motif*

MA0127.1\_PEND 3.5933e-02

--NANGAANN  
MATAAGAANT

---

**PK25011.1***forward**reverse compliment**Name**E value**Alignment**Motif*

MA0089.1\_NFE2L1\_MafG 1.5545e-01

NNNNNNNAWNN  
---GTCATN-

---

**ATHB-12**

|                                 | <i>forward</i> | <i>reverse compliment</i> |              |
|---------------------------------|----------------|---------------------------|--------------|
| <i>Name</i>                     | <i>E value</i> | <i>Alignment</i>          | <i>Motif</i> |
| MA0089.1_NFE2L1_MafG 2.0267e-01 |                | NNNNNNNNN<br>-NATGAC-     |              |

---

**si\_dkey-43p13.5**

|                         | <i>forward</i> | <i>reverse compliment</i> |              |
|-------------------------|----------------|---------------------------|--------------|
| <i>Name</i>             | <i>E value</i> | <i>Alignment</i>          | <i>Motif</i> |
| MA0210.1_ara 7.5942e-02 |                | NNNNWWNNNN<br>--TGTTW---  |              |

---

Sequence logo generation powered by [weblogo](#)  
[STAMP](#) is written by Shaun Mahony
