# Supplementary material for: Learning probabilistic protein–DNA recognition codes from DNA-binding specificities using structural mappings
Source: HighWire-hosted journal article supplement (doi:10.1101/gr.276606.122), 2022-09-01
Supplement: SUPPLEMENTAL_Matl.zip [file Stamp_Results_Homeodomain_10-21-20.pdf › SUPPLEMENTAL_Matl/rCLAMPS/STAMP/Stamp_Results_Homeodomain_10-21-20.pdf]

Jump to: [Multiple Alignment](#) [Motif Tree](#) [Motif Matching](#)

[Input file: 593 motifs loaded](#)

Settings: Metric=PCC, Alignment=SWU, Gap-open=1000, Gap-extend=1000, -nooverlapalign

Multiple Alignment=IR, Tree=UPGMA, Matching against: JASPAR

Note: All results files are removed nightly at midnight EST. Please save your results by saving "Webpage, complete".

[Download results as a PDF](#)

[Click here to run STAMP again.](#)

## Multiple Alignment

(Consensus sequence representations shown, but multiple alignment was carried out on the matrices)

```

54_CAA_LMYQR:      -----NCTTGTTARN-----
otp:               -----NYAATTAN-----
NEMVEDRAFT_v1g113057: -----NNGGATTARN-----
53_CAC_ERVSR:      -----NCGTGTTAA-----
LHX1:              -----NYNATTAN-----
LHX2:              -----NNNNTTNNNN-----
LHX3:              ----NNAWTTAATTANN-----
LHX4:              -----NTAATTAN-----
LHX6:              -----NNTAATTA-----
CBG04010:          -----NNNMATTAAANN-----
LHX9:              -----NNTNATTAN-----
PK24181.1:         -----NNNNNNNNNN-----
21_TAC_ERVSV:      -----NCGYATTANN-----
ceh-74:            -----NNNCCTCACNN-----
IRX5:              -----NNNTGTNNNACAYNN-----
IRX1:              ---NNCANNNNNNNNNNNTGNN-----
IRX3:              -----WACAYGNWWWNCRTGTW-----
IRX2:              -----NWACAYGACANN-----
10_TGG_KSVMQ:      -----NNCATTARNN-----
pal-1:             -----TTWATTAC-----
GSC2:              -----NNNATTAN-----
Isl1:              -----NCCATTAGN-----
Isl2:              -----NNNTNNN-----
18_TAG_RLTQA:      -----NNCAATTARN-----
271_AAC_KLQRF:     -----NCGTYTTANN-----
HGTX:              -----NTMATTAN-----
WOX11:             -----NNTAATTAANT-----
WOX13:             -----NNTGATTGAN-----
Q0N4F9_NEMVE:      -----MTAATTAN-----
hox12:             -----GTMATWAA-----

```

## Stamp Results

10/21/20

```

eve: -----NSTAATTAGN-----
OdsH: -----NYAATTAN-----
unc-62: -----NNNTNTNNN-----
FGRRES_07914: -----NNACATGTANN-----
225_AAC_SLQRF: -----NNGTYTTARN-----
HMLALPHA2: -----NNNGTNNN-----
59_ATC_TRMAF: -----GATTANNNN-----
Q7M3U4_ACRFO: -----NNNAATTANNN-----
SNOG_11642: -----NNWTGATTANN-----
Hoxb8: -----NNNNATWNN-----
Hoxb9: -----NNNNRTWAAN-----
Six4: -----NNNKNTNNN-----
Hoxb3: -----NNNNATTAN-----
GSX1: -----NTNATKAN-----
Hoxb6: -----NNNNNNN-----
Six1: -----NNNRTATNNN-----
Six2: -----NNNTATNN-----
HOS66: -----NNNNNNNNN-----
Hoxc11: -----NNNNRTWAAN-----
Hoxc10: -----NTTTTAYGAC-----
Hoxc12: -----NNTWAYNNNN-----
264_ACT_KVYHV: -----NNGTTTANNN-----
HOXB8: -----GYMATTAN-----
HOXB9: -----NTTTTACGAC-----
SNAPOd2T00006145001: -----NNTRATTRNN-----
Q6Y859_MARMO: -----NNNATNNNNN-----
HOXB2: -----NYAATTAN-----
zfhx4: -----NYAATTANN-----
HOXB1: -----NTAATTAC-----
HOXB6: -----GYMATTAN-----
HOXB5: -----NYMATTAN-----
HOXC11: -----NNTTTACGAYN-----
HOXC10: -----NNTTTATKRCN-----
HOXC12: -----NTTTTATTACN-----
Hoxd12_CONSTRUCT: -----NNTNAYNNNN-----
272_AAC_VAQR: -----NCGTTTTANN-----
hbn: ---NTAATTAAATTAN-----
HOX6: -----NTGATTGNNN-----
Hoxa6: -----NNNNATTAN-----
HDG11: -----NCATTWAWKN-----
CAD25866: -----NNNTTGAGAKN-----
barx1: -----NNNNATTAN-----
Duxbl1: -----NTGATTRNN-----

```

## Stamp Results

10/21/20

|                       |                           |
|-----------------------|---------------------------|
| Hmx2:                 | -----NNNCRNTTNN-----      |
| 243_GGT_ATKSM:        | -----NTMCTTARNN-----      |
| ceh-24:               | -----NNYNCTYNN-----       |
| ceh-23:               | -----NNNTAATTAN-----      |
| ceh-22:               | -----NNNCACTTNA-----      |
| vis:                  | -----NTGTCA-----          |
| Dfd:                  | -----NNYCATTANN-----      |
| MTAL2_KLUDE:          | -----WTTACAYG-----        |
| BSX:                  | -----NNCGTTAN-----        |
| B-H2:                 | -----NNCGTTTANN-----      |
| B-H1:                 | -----NNCGTTTANN-----      |
| HNF1B:                | ----GTTAATNATTAAY-----    |
| 20_TAC_QRVSA:         | -----CGYATTARNN-----      |
| CG5369:               | ----TAATNNAATTA-----      |
| 24_GTG_HLIQY:         | -----NCACTTANNN-----      |
| ceh-90:               | -----NGTTTTANN-----       |
| BARX1:                | -----NNATTAAAWANCNATTA--- |
| CNK00090:             | -----ATAATTAA-----        |
| mirr:                 | -----TGTTWNNN-----        |
| Dbx2:                 | -----NNNANNN-----         |
| Gbx2:                 | -----NNYAATTANN-----      |
| Gbx1:                 | -----NNYAATTANN-----      |
| Dbx1:                 | -----TAATTAAT-----        |
| Hlx:                  | -----NNNAWNN-----         |
| SNOG_08903:           | -----TTGATTTR-----        |
| EMX2:                 | -----NTAATTAG-----        |
| EMX1:                 | -----NTAATTAN-----        |
| HAT1:                 | -----NNATGATTRN-----      |
| Q1WMN9_COPDI:         | -----NNGATTNNNN-----      |
| GRMZM2G087741:        | -----NGMYGTCANN-----      |
| Pdx1:                 | -----NNNATTAN-----        |
| 15_TCC_RMIKS:         | -----NGGATTARNN-----      |
| cad:                  | -----NTTTTATKGCNN-----    |
| Q0N4H2_NEMVE:         | -----ANYAATTA-----        |
| Q9GP48_9TURB:         | -----NTAATTAN-----        |
| Q24782_9CNID:         | -----TTAATTAA-----        |
| FGRRES_01100:         | -----YAATTAAW-----        |
| 229_TTC_GRISA:        | -----NNYATTANNN-----      |
| estExt_gwp_gw1.C_702: | -----NNNNTNATTN-----      |
| 218_CTG_KQNQK:        | -----NNTRGTTAAN-----      |
| Bsx:                  | -----NNNNATTAN-----       |
| ceh-5:                | -----NNNATTANN-----       |
| 39_CTA_IFNAK:         | -----NCTMGTTANN-----      |

## Stamp Results

10/21/20

```
MTR_2g038000: -----NNNNNAGNNN-----
POU5F1B: -----NNNTTNN-----
AAZ08039: -----NNYAATTANN-----
YHP1: -----NWWATTRNN-----
255_CCT_RADGK: -----NNNGGTTANN-----
ATEG_00670: -----NNNNACNNN-----
TVAG_451170: -----NNCRCATCAN-----
lab: -----STAATTAN-----
Nkx2-9: -----NNRAGTRNNN-----
HB-5: -NWNNNNNNCAATTATTGNTNN-----
Nkx2-1: -----NNRAGNRN-----
Nkx2-6: -----NNNCACTTNN-----
Nkx2-4: -----NNRAGNRNNN-----
43_CCT_MTNGK: -----NTGGTTAANN-----
34_GAT_RTMY: -----NGTCTTARNN-----
HMBOX1: -----NCTAGTTAN-----
caup: -----NWNTAACA-----
so: -----NGTATCAN-----
48_CCA_EHNAK: -----NNTRGTTANN-----
NEMVEDRAFT_v1g101664: -----GATYGATT-----
unc-4: ----TAATTNAATTA-----
Ubx: -----NYAATTAN-----
Rx: -----NYAATTAN-----
SNAPOd2T00005194001: -----NNTACATGTNN-----
CBG24578: -----NNNTGACAGSTN-----
HAT3.1: -----NNNGGTKYAN-----
Nkx6-3: -----NNNATNANN-----
Nkx6-1: -----NYNATTANN-----
Q6WL90_TRICY: -----NNNATTAN-----
Q9C1N5_COPSC: -----NNGATTGNN-----
SIX4: -----NNGTATCRNN-----
SIX5: -----ACTACAAYTC-----
SIX1: -----NCGTATCRNN-----
SIX2: -----NNGTATCRNN-----
Barx2: -----NNNNATTAN-----
HNF1A: ---NRTTAATNATTAACN-----
Vsx1: -----NCAATTAN-----
Vsx2: -----NYAATTAN-----
RAX: -----YTAATTAN-----
WUS: -----TCAWTCAWTCA-----
GRMZM2G135447: -----SMYGTCAN-----
HDG7: -----NCATTAAWTRN-----
HDG1: -----NCATTAATTRN-----
```

## Stamp Results

10/21/20

|                       |                       |
|-----------------------|-----------------------|
| DPRX:                 | -----NGGATTATCN-----  |
| ESX1:                 | -----NYAATTAN-----    |
| SHOX2:                | -----NYAATTAN-----    |
| 270_AAG_RAQWF:        | -----CCTYTTNNNN-----  |
| NEMVEDRAFT_v1g129868: | -----NNNNNTNRN-----   |
| CADAORAG00002315:     | -----NNNNACANN-----   |
| 203_GTC_VQKRF:        | -----NCGTCTTAR-----   |
| ATHB-53:              | -----NCAATTATTGN----- |
| Tlx2:                 | -----ATTAAWTA-----    |
| ATHB-51:              | -----ATWATTNN-----    |
| ceh-62:               | -----NNTAATTANN-----  |
| CaO19.4000:           | -----NNNNATTRN-----   |
| Rax:                  | -----NNAATTANN-----   |
| 49_CAT_LSQSR:         | -----NNTGTTARN-----   |
| en:                   | -----NYAATTAN-----    |
| Nobox:                | -----NNYNATNNN-----   |
| 221_CTG_RLYQK:        | -----NNTRGTTAAN-----  |
| abd-A:                | -----NGTAATTANN-----  |
| D11:                  | -----NYAATTAN-----    |
| Lhx6_CONSTRUCT:       | -----NYAATYANN-----   |
| pha-2:                | -----NNNATNNNNN-----  |
| MNX1:                 | -----NTAATTAN-----    |
| Cphx1:                | -----WGATNNNNNN-----  |
| CG11085:              | -----NCRATTAN-----    |
| ftz:                  | -----GTAATTAA-----    |
| uncx:                 | -----NYAATTANN-----   |
| EN1:                  | -----NNTAATTA-----    |
| EN2:                  | -----NTAATTAN-----    |
| 42_CGA_TFYAA:         | -----NCTCGTTAN-----   |
| E5:                   | -----NNNATTAN-----    |
| HAT22:                | -----AATGATTRNN-----  |
| ro:                   | -----TAATTARN-----    |
| 2_TTT_RTVSA:          | -----NNNATTARNN-----  |
| lms:                  | -----NYAATTAN-----    |
| ENSCING00000016045:   | -----NCYAATTARNN----- |
| En1:                  | -----NNNANNN-----     |
| Hoxa5:                | -----NNNNATTAN-----   |
| egl-5:                | -----CCCATTAAT-----   |
| Hoxa3:                | -----NNYNATTAN-----   |
| Hoxa2:                | -----NNTAATTANN-----  |
| Hoxa1:                | -----NNYNATTNN-----   |
| PK19166.1:            | -----RTTAGGGG-----    |
| 26_GGT_ALKNM:         | -----NCGCCTTAAN-----  |

## Stamp Results

10/21/20

|                |                        |
|----------------|------------------------|
| Hoxa9:         | -----NNNNNNNN-----     |
| CIMG_06089:    | -----NNNNNNNNNN-----   |
| Nanog:         | -----NNNNATNNN-----    |
| Gsx2:          | -----NNNNATTAN-----    |
| HAT3:          | -----NTGATTRN-----     |
| HAT2:          | -----NNAATGATTRN-----  |
| HAT5:          | -----WNAATTATTNN-----  |
| Dbx:           | -----ATTAATTA-----     |
| 223_CTC_RTFGK: | -----NTTAGTTANN-----   |
| NCU03266:      | -----NYNATTWNNN-----   |
| Q0N4H9_NEMVE:  | -----NNNNTYRNN-----    |
| PDX1:          | -----NTMATTAR-----     |
| NK7.1:         | -----NACCGTTTAAN-----  |
| ISX:           | -----CTAATTAN-----     |
| Q70LF3_ARTSF:  | -----NTAATTAN-----     |
| Hoxa11:        | -----NNNTTTACGANN----- |
| Hoxa10:        | -----NNNNNTNNN-----    |
| Nkx2-2:        | -----NNNRAGNRN-----    |
| 303_CTC_VMNRK: | -----NTGAGTTANN-----   |
| CAD26261:      | -----TWWATTANN-----    |
| KNAT4:         | -----NNNNGTCNN-----    |
| KNAT7:         | -----AGAYGTCA-----     |
| KNAT6:         | -----NNNNGTCNNN-----   |
| Hmx:           | -----NCAMTTAN-----     |
| KNAT3:         | -----NNNNGTCNNN-----   |
| Lim3:          | -----NTAATTAN-----     |
| Lim1:          | -----NYAATTAN-----     |
| lin-39:        | -----GATTGATG-----     |
| PRH_PETCR:     | -----ATATATWA-----     |
| Abd-B:         | -----NWTTTACGACN-----  |
| Q9BJW6_9CNID:  | -----NCTAATTANN-----   |
| Nkx3-1:        | -----NNAAGTGNNN-----   |
| Otp:           | -----NNATTANN-----     |
| Nkx3-2:        | -----NNAAGTRNN-----    |
| ceh-19:        | -----NNCNATTAN-----    |
| 247_GCG_RTDRS: | -----NKKCTTARNN-----   |
| Meis3:         | -----NTGTCAN-----      |
| 55_CAA_LHYVR:  | -----NNTTGTTANN-----   |
| Q24780_9CNID:  | -----NNTAATTAANN-----  |
| Hdx:           | -----NNATNNN-----      |
| ATHB-12:       | -----NNNNNNNN-----     |
| ATHB-13:       | -----NNAATTATTRN-----  |
| ATHB-16:       | -----AATKATTA-----     |

## Stamp Results

10/21/20

|                       |                                |
|-----------------------|--------------------------------|
| ATHB-15:              | -----AATAATTACT-----           |
| Q00354_COPCI:         | -----NGATTGGT-----             |
| AGAP009986:           | -----NNNNTGTNNN-----           |
| Mnx1:                 | -----NNNNNATTAN-----           |
| Q86SD7_PODCA:         | -----NNTAATTANN-----           |
| HOXA6:                | -----NGYMATTANN-----           |
| HOXA5:                | -----STAATTAS-----             |
| HOXA2:                | -----NTAATTAN-----             |
| HOXA1:                | -----NNTAATTANN-----           |
| Q8VHG7_MOUSE:         | -----NGGATTAW-----             |
| 4_TTC_VRVSA:          | -----NNNATTARNN-----           |
| HOXA9:                | -----NNNTTTAYGAYN-----         |
| Obox6:                | -----NNRGATTAN-----            |
| Obox5:                | -----NNNATNAN-----             |
| Obox3:                | -----NNATNWN-----              |
| Obox1:                | -----NNNGGATTAN-----           |
| lbe:                  | -----NNTCGTTA-----             |
| 38_CTA_LHYAK:         | -----NCTAGTTARN-----           |
| 256_CCA_RLYQK:        | -----NNTRGTTANN-----           |
| lbl:                  | -----CTMATTAN-----             |
| HXD12_HETFR:          | -----TTAATTAC-----             |
| DMBX1:                | -----NGGATTAN-----             |
| ALX3:                 | -----NYAATTAN-----             |
| 73_AAT_KLTAF:         | -----NTACTTARNN-----           |
| Emx2:                 | -----NNNNATTAN-----            |
| ALX4:                 | -----NYAATTAN-----             |
| 75_AAC_SISRF:         | -----NNTCTTAANN-----           |
| NEMVEDRAFT_v1g114268: | -----AYCNATTAN-----            |
| vnd:                  | -----TYTCAAGTR-----            |
| Smp_158000:           | -----CYAATTAA-----             |
| CG32105:              | -----YTAATTAA-----             |
| DRGX:                 | -----NYAATTAN-----             |
| 46_CCC_RLDSK:         | -----NCGGGTTAR-----            |
| Dlx4:                 | -----NNNATTAN-----             |
| bsh:                  | ----TAATYTAATTA-----           |
| ATEG_04171:           | -----NNNYAATTWN-----           |
| exex:                 | -----NNNNYAATTNNCNN-----       |
| SNAPod2T00003340001:  | -----NWWATTANNN-----           |
| CBG10835:             | -----NNNNTCANN-----            |
| schlank:              | -----AWNTTGGTRG-----           |
| TLX2:                 | -----NYAATTAN-----             |
| TLX3:                 | NAATTGNNNNNNNNNNNNNNCAATTN---- |
| GSX2:                 | -----SYMATTAN-----             |

## Stamp Results

10/21/20

```

37_GAA_RFQKF:      -----NSTTCTTAAN-----
TGIF2:             ---TGACANNTGTCA-----
TGIF1:             ---TGACAGCTGTCA-----
Dmbx1:             -----NNRGATTAN-----
Rhox6:             -----NNNATTAN-----
CG18599:           -----TAATTAN-----
Rhox8:             -----NTTACACCN-----
Uncx:              ---NTAATTNRATTAN-----
40_CGG_STRER:      -----YCCGTTAANN-----
13_TCT_ATVKA:      -----NGGATTARNN-----
Hoxb5:             -----NNNNATNAN-----
Tgif2:             -----NNNTGTCANN-----
Tgif1:             -----NNNTGTCANN-----
PK20392.1:         -----NNATKATTNN-----
C4B866_NEMVE:      -----NNNTAATTAANN-----
Hoxd8:             -----NNNNNNNN-----
Hoxd9:             -----NCCATWAAA-----
yox1:              -----NNNNATNNNN-----
Hoxd1:             -----NNNNATYN-----
Hoxd3:             -----NNYAATTANN-----
14_TCG_KGTQM:      -----CCCATTARNN-----
POU6F1:            -----NNTAATTANN-----
Y749_MIMIV:        -----TATATTAA-----
Q0N4H7_NEMVE:      -----NNNNNATNNN-----
Meox1:             -----NNYMATTAN-----
HOXD8:             -----GYMATTAN-----
HOXD9:             -----NTTTTATTGC-----
EVX1:              -----NTAATTAN-----
HOXD1:             -----NTAATTAN-----
EVX2:              -----NTAATTAN-----
repo:              -----NYTAATTAAN-----
PDF2:              ---NANRGAATATTCNNN-----
hbx4:              -----NNNYGTCANN-----
hbx2:              -----NNATATATWN-----
bap:               -----NNCACTTANN-----
PK25034.1:         -----NNMNGTCANN-----
SNAPod2T00006620001: -----NYAATTAN-----
ems:               -----NTAATTAN-----
PRRX1:             -----NYAATTAN-----
CG15696:           -----NNNATTRNN-----
PRRX2:             -----NNCRTNAN-----
NCU03070:          -----WWTATTGRNN-----
FGRRES_17238:      -----NNNNACNNNN-----

```



## Stamp Results

10/21/20

```

hbx5-2: -----WTGATTRN-----
Meis2: -----NTGTCAN-----
Meis1: -----NNNTGTCAN-----
hbx5-1: -----TTGATTGR-----
ara: -----NNAWAACA-----
CG2808: ----TAATSNAATTA-----
btn: -----NNTMATTANN-----
CAGL0H02959g: -----NNNYGTCANN-----
CAD25284: -----TTAATTAN-----
HMRA2: -----WTTACAYG-----
ATHB-22: ----NNNWAWATTATNN-----
ATHB-21: -----NNAATWATTGNTNN-----
ATHB-20: -----NNAATTATTRN-----
MEIS3: ---TGACANNTGTCA-----
MEIS2: ---TGACAGCTGTCA-----
MEIS1: -----NTGTCAN-----
tup: -----CMATTAWS-----
ceh-58: -----NNYAATTANN-----
Awh: -----NTAATTAN-----
ceh-54: -----NNYAATTAN-----
Dobox5_CONSTRUCT: -----NNRGATTAN-----
ceh-57: -----NNNNNTWAN-----
ceh-51: -----NNNATNRNN-----
ceh-53: -----NRGATTAN-----
PHO2: -----NNNNNATNNN-----
LBX2: -----CTCRTTAA-----
LBX1: -----CTAATTAN-----
226_TTT_KMISA: -----NNNATTANNN-----
Q5EVH4_OIKDI: -----NCTGTCAN-----
Q1WMN0_COPDI: -----NNGATTGNN-----
PKNOX1: ---TGACASSTGTCA-----
PKNOX2: ---TGACANNTGTCA-----
Hnf1b: -----NNNGTNNN-----
ANHX: -----TTGACAWG-----
253_CGT_VANSR: -----NNTGTTANN-----
NEMVEDRAFT_v1g81436: -----NNNNTNNNNN-----
Hnf1a: -----NNNGTTAN-----
220_CTG_LTYQK: -----NCTRGTTANN-----
ENSTNIG00000017092: -----NTGATTAN-----
H2.0: -----TNATWAA-----
NEMVEDRAFT_v1g80394: -----NNNATNNNN-----
unpg: -----NNCAATTANN-----
NEMVEDRAFT_v1g164989: -----CTAATTAR-----

```

## Stamp Results

10/21/20

```

308_GCG_RLDRF:  -----NNTCTTAANN-----
216_TGC_NRVMM:  -----NGCATTARNN-----
250_GAT_AGKTF:  -----NNTCTTARNN-----
310_GTC_YRRGA:  -----NTACTTARNN-----
ANIA_01217:     -----NNTATTNNNN-----
Noto:           -----NNNNATNNNN-----
MEOX1:          -----NSTAATTANN-----
MEOX2:          -----NNTAATTANN-----
Nkx1-1:         -----NNNNATTANN-----
pdm3:           -----CTAATTAN-----
UM04928:        -----NNNATNNNNN-----
Hmbox1:         -----NNNGTNNN-----
Alx3:           -----NNNATTA-----
CG11617:        -----WTTTWACA-----
ZHX1:           -----NNNYNNNN-----
HOXA11:         -----NTTTTACGACN-----
HOXA10:         -----NTTTTACGACN-----
pb:             -----GTMATTAN-----
Alx4:           -----NTAATYNAATTAN-----
Barx1:          -----NNNNATTANN-----
ATHB-4:         -----NNMTGCATRNN-----
ATHB-5:         -----NNAATTATTGN-----
ATHB-6:         -----NATNATTNN-----
ATHB-7:         -----NNATGATTGN-----
ATHB-9:         -----NTAATCATTAYNWTN-----
Rhox11:         -----NNNTGTWNNN-----
ventx3.2:       -----TAATTAAT-----
208_CTC_HFNrk:  -----NCKASTTAAN-----
phx1:           -----NNTAATTAANN-----
CBG23031:       -----NNNNATWAAN-----
CBG08197:       -----NNNGTNNN-----
Cdx4:           -----TGATTTATNGNN-----
ATHB-X:         -----NCAATYATTNN-----
51_CAG_MSHWR:   -----NCTGTTAN-----
Prrx2:          -----NYAATTAN-----
si_dkey-43p13.5: -----NNNNWWNNNN-----
Lbx2:           -----NNNNTTNN-----
CG9876:         -----NNYRATTANS-----
NEMVEDRAFT_v1g8907: -----NNNYMATTAN-----
ind:            -----TAATTARNR-----
7_TTA_RVLRA:    -----TAATTARNN-----
237_TAG_YAVNA:  -----NMATTARNNN-----
C15:           -----YMWTTAAN-----

```

## Stamp Results

10/21/20

```

hbx7:      -----NNNNGCATNTNNN-----
UNCX:      -----NNAATTNN-----
TGIF2LY:   ---TGACANNTGTCA-----
TGIF2LX:   ---TGACAGNTGTCA-----
CBG00023:  -----NNNNNATWAN-----
Prrx1:     -----NNNAATTA-----
236_TAG_KSTQM: -----NCCATTANNN-----
CG34031:   -----NNNNNNNRN-----
mix11.S:   -----NNTAATTAANN-----
NEMVEDRAFT_v1g205636: -----NTAATTAN-----
CBG07641:  -----NNTAATTANN-----
NEMVEDRAFT_v1g197288: -----NNAAGTRNNN-----
dharma:    -----GGATNNN-----
gsc:       -----NGGATTAN-----
Q68SS9_PLEDJ: -----NGATTGNN-----
Dlx5:      -----NNNATTW-----
Dlx1:      -----NYAATTAN-----
Dlx2:      -----NYAATTAN-----
Dlx3:      -----NNNNATTAN-----
Hmx1:      -----NNNCRNTTNN-----
260_ATA_KAYNA: -----NTNGTTARNN-----
CDX1:      -----NTTTTATGGCN-----
ISL1:      -----SCACTTAN-----
ISL2:      -----NCACTTAN-----
CDX2:      -----NNTTAYRAYN-----
SPU_026099: -----NTAATTAA-----
GSC:       -----NGGATTAN-----
ARGFX:     -----NCTAATTARN-----
ENSTNIG00000004116: -----CTAATTAA-----
NKX2-1:    -----NTKGAGTGNN-----
Phyra73700: -----NNNNNNNTCAN-----
prd-b:     -----NTRATTRNN-----
268_AAT_KLQAF: -----NTWCTTAANN-----
227_TTT_YRIAA: -----NAATTANNNN-----
ANIA_00885: -----NNTKACANNN-----
ventx1.1.L: -----NNNNNNNNNN-----
En2:       -----NSTAATTANN-----
CBG00029:  -----TAATTAAT-----
FGRRES_17152: -----ATGACATG-----
FGRRES_17150: -----NWTGACAWNN-----
210_CCG_RSNQK: -----NTGGTTAANN-----
YOX1:      -----YNATWWN-----
Hoxd10:    -----NNNNNNNN-----

```

## Stamp Results

10/21/20

|                       |                            |
|-----------------------|----------------------------|
| Hoxd11:               | -----NNNNNNNN-----         |
| MTAL2_PICAN:          | -----NNNTGTNNN-----        |
| NKX6-2:               | -----NYAATTAN-----         |
| NKX6-3:               | -----NTCATTAWN-----        |
| NKX6-1:               | -----NATYAWWWNNNMATTWNTN   |
| Hoxc9:                | -----NTTAATTACN-----       |
| Hoxc8:                | -----NNNNNNNNN-----        |
| BARHL2:               | -----ANCGTTTAN-----        |
| BARHL1:               | -----NCGTTTAN-----         |
| Hoxc6:                | -----RTAATTAA-----         |
| Shox2:                | -----NYAATTAN-----         |
| vab-7:                | -----MTAATTAA-----         |
| ENSTNIG00000006040:   | -----NNNYNATTANNNN-----    |
| HOXC9:                | -----NTTTATKGCN-----       |
| lim-4:                | -----NNTAATTAR-----        |
| Evx1:                 | -----NNNNATTAN-----        |
| Evx2:                 | -----NNATTANN-----         |
| Isx:                  | -----NNATTNNN-----         |
| NEMVEDRAFT_v1g136480: | -----NNNNNNNNNN-----       |
| 258_ATT_RTVQQ:        | -----NTMATTANNN-----       |
| Lhx1:                 | -----NNNNNATTA-----        |
| Lhx2:                 | -----NYMATTAN-----         |
| Lhx3:                 | -----NNNTAATNN-----        |
| Lhx4:                 | -----NTAATTAN-----         |
| Lhx5:                 | -----NNNYAATTA-----        |
| Lhx6:                 | -----NTRATTRN-----         |
| Lhx8:                 | -----NTRATTANNNNTRATTAN--- |
| Lhx9:                 | -----NYNATTAN-----         |
| GRMZM2G038252:        | -----NCAATCAN-----         |
| Pknox1:               | -----NGACANNN-----         |
| Pknox2:               | ---TGACACCTGTCA-----       |
| DLX4:                 | -----NCAATTAN-----         |
| DLX5:                 | -----NCAATTAN-----         |
| DLX6:                 | -----NCAATTAN-----         |
| DLX1:                 | -----NYAATTAN-----         |
| DLX2:                 | -----NYAATTAN-----         |
| DLX3:                 | -----NYAATTAN-----         |
| 44_CCT_RGDSK:         | -----CGGGTTAN-----         |
| 241_GTT_GLRAF:        | -----NTACTTANNN-----       |
| ATML1:                | -----NNNANTNANN-----       |
| ceh-34:               | -----NNNRKATNNN-----       |
| LMX1A:                | -----TTAATTAN-----         |
| LMX1B:                | ----NNNNTAATTAN-----       |

## Stamp Results

10/21/20

|                 |                           |
|-----------------|---------------------------|
| MATALPHA2:      | -----NNNGNNNN-----        |
| Gsc:            | ----TWANNGGATTA-----      |
| achi:           | -----NTGTCA-----          |
| 252_CTC_LRYSK:  | -----NTAGTTANNN-----      |
| HOXB3:          | -----NNYMATTANN-----      |
| RLT1:           | -----NANGAANN-----        |
| HOXD12:         | -----NTTTACGAYN-----      |
| HOXD10:         | -----NTTTTATKRC-----      |
| HOXD11:         | ----NTWANNNTTTACGAYN----- |
| CUP9:           | -----NWTGTGTCAN-----      |
| UM00578:        | -----NNGATNNNN-----       |
| FGRRES_16926_M: | -----NNNACANN-----        |
| Scr:            | -----NYMATTAN-----        |
| TVAG_493070:    | -----NNCACATCANN-----     |
| Q4RRY4_TETNG:   | -----NTRATTRNN-----       |
| Q0ZPQ4_NEMVE:   | -----CTTCTTAA-----        |
| 267_ACA_RVSHT:  | -----NTGTTTAANN-----      |
| Q00352_COPCI:   | -----TGATTGGTT-----       |
| TOS8:           | -----NNNTGACGTMW-----     |
| 56_ATT_HRVQA:   | -----NYAATTARNN-----      |
| NOBOX:          | -----NNNNATNRNN-----      |
| GBX2:           | -----NYAATTAN-----        |
| GBX1:           | -----NSYAATTANN-----      |
| O76842_CUPSA:   | -----NTAATTAA-----        |
| NANOG:          | -----NCNRTYAN-----        |
| kal-1:          | -----NNNTNNNN-----        |
| AAEL012091:     | -----NNGATNNNN-----       |
| 36_GAC_ATTRF:   | -----NCGTCTTAN-----       |
| scro:           | -----NCACTYNNN-----       |
| HHEX:           | -----WTNAATTA-----        |
| PK25011.1:      | -----NNNNNNAWNN-----      |
| Q0ZPQ8_NEMVE:   | -----NNNYGTCAN-----       |
| NCU09556:       | -----TATATTAA-----        |
| MIXL1:          | -----NNYAATTANN-----      |
| HDX:            | -----NNNNNNNN-----        |
| 60_ATA_KTVQV:   | -----NTMATTARNN-----      |
| CG4328:         | -----NWTWATTR-----        |
| CNG03450:       | -----NNWATTAN-----        |
| 232_TCG_IKNQM:  | -----NYCATTARNN-----      |
| dve:            | -----NNTAATTAGN-----      |
| Q0N4M8_NEMVE:   | -----GTAATTAN-----        |
| NKX3-2:         | -----NCCACTTANN-----      |
| NKX3-1:         | -----NCCACTTANN-----      |

## Stamp Results

10/21/20

```

Irx5: -----NNTGTNNNN-----
Irx4: -----NTNTNNNN-----
CBG20882: -----NYNATNNNN-----
Irx6: -----NTNTNNN-----
Irx3: -----YWACATGAMAAA-----
Irx2: -----NNNTGTNNN-----
HMX1: -----NCAMTTANN-----
HMX3: -----NNCAMTTANNN-----
HMX2: -----NCACTTRNC-----
NEMVEDRAFT_v1g81309: -----NNNNATTAN-----
Cdx1: -----NNYNATWNN-----
inv: -----TAATTARW-----
Cdx2: -----NNYNATWWN-----
hbx10: -----NWWATTRN-----
ENSCING00000007395: -----NWNNNNNN-----
RHOXF1: -----GGATNATCN-----
ap: -----TAATTARN-----
Q70HR3_PLEPI: -----NNNTACTTAN-----
Sebox: -----NNTTAATTAN-----
263_AGA_VRFAA: -----NNTACTTANN-----
235_TAT_RAVSV: -----NNCATTARNN-----
17_TAT_TRVSA: -----NNYATTARNN-----
249_GCA_QLKQS: -----NNNNAAGTAN-----
XP_003689450.1: -----NNNANMCNNN-----
Lmx1a: -----NNNATNRN-----
Lmx1b: -----NNATNAN-----
217_GGG_KSKEG: -----NCCCTTARNN-----
ANL2: -----NCATTAATTNN-----
304_CTG_TTNQK: -----CCRGTTANNN-----
AGAP006642: -----GGATTANN-----
slou: -----NNYAATTANN-----
Meox2: -----NTAATTAN-----
RAX2: -----NYAATTAN-----
SHOX: -----NYAATTAN-----
76_AAA_RAQWF: -----CCTYTTAANN-----
NEMVEDRAFT_v1g105595: -----NNAATTAN-----
CG11294: -----TAATTNNATTA-----
Nkx1-2: -----NNNATTANN-----
Barhl2: -----NNYNNTTAN-----
Barhl1: -----NNCRTTTANN-----
bcd: -----GGATTAN-----
64_AGA_AFRAH: -----NNTMCTTAAN-----
242_GTC_LQGA: -----NTACTTANNN-----

```

```

205_GAA_TQRQW:  -----NTACTTANN-----
Q8I9J5_9BILA:   -----NRTWATTANN-----
NOTO:           -----NYAATTAN-----
KLLA0_D10043g:  -----NNNNNNNNNN-----

```

**Familial Profile:**  
(click for matrix)

---

## Motif Tree

| Tree (drawn by <a href="#">Phylip</a> )<br><a href="#">Click here for Newick-format tree</a> (viewable with <a href="#">MEGA</a> ) | Input Motif         | Best match in JASPAR                 |
|------------------------------------------------------------------------------------------------------------------------------------|---------------------|--------------------------------------|
|                                                                                                                                    | <u>54 CAA LMYQR</u> | MA0217.1_caup<br>(E val: 8.9496e-06) |
|                                                                                                                                    | <u>42 CGA TFYAA</u> | MA0186.1_Dfd<br>(E val: 2.4354e-03)  |
|                                                                                                                                    | <u>lbe</u>          | MA0186.1_Dfd<br>(E val: 4.2043e-04)  |
|                                                                                                                                    | <u>LBX2</u>         | MA0186.1_Dfd<br>(E val: 5.8346e-08)  |
|                                                                                                                                    | <u>39 CTA IFNAK</u> | MA0231.1_lbe                         |

|                      |                                         |
|----------------------|-----------------------------------------|
|                      | (E val: 8.3745e-06)                     |
| <u>HMBOX1</u>        | MA0231.1_lbe<br>(E val: 4.3822e-07)     |
| <u>38 CTA LHYAK</u>  | MA0231.1_lbe<br>(E val: 7.0847e-07)     |
| <u>220 CTG LTYOK</u> | MA0231.1_lbe<br>(E val: 4.1962e-05)     |
| <u>260 ATA KAYNA</u> | MA0231.1_lbe<br>(E val: 5.8661e-04)     |
| <u>223 CTC RTFGK</u> | MA0231.1_lbe<br>(E val: 1.4477e-06)     |
| <u>252 CTC LRYSK</u> | MA0231.1_lbe<br>(E val: 1.8927e-06)     |
| <u>303 CTC VMNRK</u> | MA0099.2_API<br>(E val: 6.0862e-05)     |
| <u>53 CAC ERVSR</u>  | MA0173.1_CG11617<br>(E val: 2.3925e-06) |



|                      |                                         |
|----------------------|-----------------------------------------|
| <u>46 CCC RLDSK</u>  | MA0421.1_YDR026C<br>(E val: 5.5305e-06) |
| <u>44 CCT RGDSK</u>  | MA0452.1_Kr<br>(E val: 4.6188e-05)      |
| <u>218 CTG KQNQK</u> | MA0231.1_lbe<br>(E val: 1.0395e-05)     |
| <u>43 CCT MTNGK</u>  | MA0231.1_lbe<br>(E val: 9.6156e-04)     |
| <u>221 CTG RLYQK</u> | MA0231.1_lbe<br>(E val: 4.9698e-05)     |
| <u>210 CCG RSNQK</u> | MA0231.1_lbe<br>(E val: 2.4988e-04)     |
| <u>48 CCA EHNAK</u>  | MA0231.1_lbe<br>(E val: 1.4619e-05)     |
| <u>256 CCA RLYQK</u> | MA0231.1_lbe<br>(E val: 8.6188e-06)     |
|                      |                                         |

|                      |                                      |
|----------------------|--------------------------------------|
| <u>BSX</u>           | MA0217.1_caup<br>(E val: 4.8362e-03) |
| <u>PRRX2</u>         | MA0186.1_Dfd<br>(E val: 2.6340e-03)  |
| <u>40 CGG STRER</u>  | MA0248.1_tup<br>(E val: 8.8280e-04)  |
| <u>255 CCT RADGK</u> | MA0217.1_caup<br>(E val: 5.1581e-03) |
| <u>ceh-57</u>        | MA0217.1_caup<br>(E val: 6.2734e-03) |
| <u>Hnf1b</u>         | MA0217.1_caup<br>(E val: 4.2044e-03) |
| <u>Hnf1a</u>         | MA0217.1_caup<br>(E val: 2.6865e-03) |
| <u>Hmbox1</u>        | MA0231.1_lbe<br>(E val: 9.7179e-02)  |
|                      |                                      |

|                      |                                       |
|----------------------|---------------------------------------|
| <u>271 AAC KLQRF</u> | MA0127.1_PEND<br>(E val: 4.1253e-03)  |
| <u>203 GTC VQKRF</u> | MA0127.1_PEND<br>(E val: 3.2871e-04)  |
| <u>36 GAC ATRRF</u>  | MA0127.1_PEND<br>(E val: 5.6761e-04)  |
| <u>225 AAC SLQRF</u> | MA0393.1_STE12<br>(E val: 2.3663e-03) |
| <u>34 GAT RTMRY</u>  | MA0211.1_bap<br>(E val: 1.1833e-03)   |
| <u>272 AAC VAQRC</u> | MA0393.1_STE12<br>(E val: 3.5152e-04) |
| <u>ceh-90</u>        | MA0393.1_STE12<br>(E val: 1.3427e-03) |
| <u>250 GAT AGKTF</u> | MA0127.1_PEND<br>(E val: 1.6496e-02)  |
|                      |                                       |

|                      |                                      |
|----------------------|--------------------------------------|
| <u>26 GGT ALKNM</u>  | MA0211.1_bap<br>(E val: 8.8493e-04)  |
| <u>217 GGG KSKEG</u> | MA0211.1_bap<br>(E val: 4.4540e-05)  |
| <u>247 GCG RTDRS</u> | MA0211.1_bap<br>(E val: 1.2248e-03)  |
| <u>37 GAA RFOKE</u>  | MA0127.1_PEND<br>(E val: 4.5636e-06) |
| <u>Q0ZPQ4 NEMVE</u>  | MA0127.1_PEND<br>(E val: 1.6660e-08) |
| <u>268 AAT KLQAF</u> | MA0211.1_bap<br>(E val: 1.1050e-05)  |
| <u>75 AAC SISRF</u>  | MA0211.1_bap<br>(E val: 8.0890e-04)  |
| <u>308 GCG RLDRE</u> | MA0211.1_bap<br>(E val: 8.1581e-04)  |
|                      |                                      |

|                      |                                        |
|----------------------|----------------------------------------|
| <u>270 AAG RAQWF</u> | MA0053.1_MNB1A<br>(E val: 2.4849e-02)  |
| <u>76 AAA RAQWF</u>  | MA0211.1_bap<br>(E val: 8.9918e-04)    |
| <u>243 GGT ATKSM</u> | MA0124.1_NKX3-1<br>(E val: 6.9614e-06) |
| <u>64 AGA AFRAH</u>  | MA0211.1_bap<br>(E val: 5.1182e-06)    |
| <u>73 AAT KLTAf</u>  | MA0211.1_bap<br>(E val: 8.0708e-07)    |
| <u>208 CTC HFNRK</u> | MA0211.1_bap<br>(E val: 1.6084e-05)    |
| <u>310 GTC YRRGA</u> | MA0124.1_NKX3-1<br>(E val: 1.3755e-06) |
| <u>242 GTC LQRGa</u> | MA0124.1_NKX3-1<br>(E val: 1.3807e-06) |
|                      |                                        |

|                      |                                        |
|----------------------|----------------------------------------|
| <u>241 GTT GLRAF</u> | MA0124.1_NKX3-1<br>(E val: 1.5270e-06) |
| <u>205 GAA TORQW</u> | MA0124.1_NKX3-1<br>(E val: 1.8120e-06) |
| <u>263 AGA VRFAA</u> | MA0124.1_NKX3-1<br>(E val: 2.0316e-06) |
| <u>Q70HR3 PLEPI</u>  | MA0124.1_NKX3-1<br>(E val: 1.7532e-06) |
| <u>249 GCA OLKQS</u> | MA0124.1_NKX3-1<br>(E val: 7.5248e-04) |
| <u>ceh-22</u>        | MA0211.1_bap<br>(E val: 4.4240e-08)    |
| <u>vnd</u>           | MA0253.1_vnd<br>(E val: 1.1102e-16)    |
| <u>24 GTG HLIQY</u>  | MA0211.1_bap<br>(E val: 1.9677e-06)    |
|                      |                                        |

|               |                                        |
|---------------|----------------------------------------|
| <u>bap</u>    | MA0211.1_bap<br>(E val: 2.1113e-06)    |
| <u>ISL1</u>   | MA0211.1_bap<br>(E val: 7.7296e-07)    |
| <u>ISL2</u>   | MA0211.1_bap<br>(E val: 6.2608e-07)    |
| <u>HMX1</u>   | MA0063.1_Nkx2-5<br>(E val: 2.2710e-06) |
| <u>HMX2</u>   | MA0211.1_bap<br>(E val: 1.1516e-08)    |
| <u>NKX3-2</u> | MA0211.1_bap<br>(E val: 2.0976e-06)    |
| <u>NKX3-1</u> | MA0211.1_bap<br>(E val: 2.0256e-06)    |
| <u>Nkx2-6</u> | MA0211.1_bap<br>(E val: 7.4956e-04)    |
|               |                                        |

|                             |                                     |
|-----------------------------|-------------------------------------|
| <u>Nkx3-1</u>               | MA0211.1_bap<br>(E val: 8.3180e-04) |
| <u>Nkx2-9</u>               | MA0211.1_bap<br>(E val: 1.9645e-03) |
| <u>Nkx2-1</u>               | MA0211.1_bap<br>(E val: 9.7504e-04) |
| <u>Nkx2-2</u>               | MA0211.1_bap<br>(E val: 2.2528e-03) |
| <u>Nkx3-2</u>               | MA0211.1_bap<br>(E val: 6.6546e-04) |
| <u>scro</u>                 | MA0211.1_bap<br>(E val: 1.4217e-03) |
| <u>Nkx2-4</u>               | MA0211.1_bap<br>(E val: 2.2018e-03) |
| <u>NEMVEDRAFT v1g197288</u> | MA0211.1_bap<br>(E val: 2.4841e-03) |
|                             |                                     |



|                           |                                         |
|---------------------------|-----------------------------------------|
| <u>ceh-24</u>             | MA0211.1_bap<br>(E val: 5.8321e-02)     |
| <u>ENSCING00000007395</u> | MA0211.1_bap<br>(E val: 3.0174e-02)     |
| <u>Hoxb9</u>              | MA0165.1_Abd-B<br>(E val: 1.0286e-03)   |
| <u>CBG23031</u>           | MA0174.1_CG42234<br>(E val: 8.4823e-04) |
| <u>Hoxc11</u>             | MA0165.1_Abd-B<br>(E val: 2.3036e-03)   |
| <u>Hoxa9</u>              | MA0307.1_GLN3<br>(E val: 6.1601e-03)    |
| <u>Hoxd10</u>             | MA0307.1_GLN3<br>(E val: 4.1907e-03)    |
| <u>Hoxd11</u>             | MA0307.1_GLN3<br>(E val: 1.4126e-02)    |
|                           |                                         |

|               |                                       |
|---------------|---------------------------------------|
| <u>Hoxa10</u> | MA0307.1_GLN3<br>(E val: 8.7847e-03)  |
| <u>Cdx2</u>   | MA0307.1_GLN3<br>(E val: 8.2090e-03)  |
| <u>Cdx1</u>   | MA0307.1_GLN3<br>(E val: 7.8786e-03)  |
| <u>Hoxc10</u> | MA0165.1_Abd-B<br>(E val: 2.4823e-08) |
| <u>HOXB9</u>  | MA0165.1_Abd-B<br>(E val: 2.2251e-06) |
| <u>Abd-B</u>  | MA0165.1_Abd-B<br>(E val: 1.4554e-06) |
| <u>HOXA10</u> | MA0165.1_Abd-B<br>(E val: 7.2371e-06) |
| <u>HOXA11</u> | MA0165.1_Abd-B<br>(E val: 2.0449e-05) |
|               |                                       |

|               |                                       |
|---------------|---------------------------------------|
| <u>Hoxa11</u> | MA0165.1_Abd-B<br>(E val: 6.8791e-06) |
| <u>HOXD11</u> | MA0153.1_HNF1B<br>(E val: 2.3770e-05) |
| <u>HOXC11</u> | MA0165.1_Abd-B<br>(E val: 6.4582e-06) |
| <u>HOXD12</u> | MA0165.1_Abd-B<br>(E val: 1.5126e-05) |
| <u>HOXA9</u>  | MA0165.1_Abd-B<br>(E val: 4.9453e-07) |
| <u>CDX2</u>   | MA0165.1_Abd-B<br>(E val: 1.8242e-04) |
| <u>HOXC10</u> | MA0216.1_cad<br>(E val: 2.9939e-09)   |
| <u>HOXC9</u>  | MA0216.1_cad<br>(E val: 1.5245e-08)   |
|               |                                       |

|               |                                        |
|---------------|----------------------------------------|
| <u>HOXC12</u> | MA0216.1_cad<br>(E val: 4.7854e-09)    |
| <u>cad</u>    | MA0216.1_cad<br>(E val: 2.2162e-08)    |
| <u>HOXD9</u>  | MA0216.1_cad<br>(E val: 6.3975e-10)    |
| <u>HOXD10</u> | MA0216.1_cad<br>(E val: 5.7397e-10)    |
| <u>CDX1</u>   | MA0216.1_cad<br>(E val: 1.0263e-07)    |
| <u>Hoxd9</u>  | MA0165.1_Abd-B<br>(E val: 4.1215e-07)  |
| <u>Cdx4</u>   | MA0216.1_cad<br>(E val: 4.8203e-07)    |
| <u>Hoxc12</u> | MA0151.1_ARID3A<br>(E val: 3.9486e-02) |
|               |                                        |

|                         |                                        |
|-------------------------|----------------------------------------|
| <u>Hoxd12 CONSTRUCT</u> | MA0151.1_ARID3A<br>(E val: 4.2453e-02) |
| <u>264 ACT KVVHV</u>    | MA0297.1_FKH2<br>(E val: 6.6792e-04)   |
| <u>267 ACA RVSHY</u>    | MA0297.1_FKH2<br>(E val: 1.1765e-06)   |
| <u>B-H2</u>             | MA0168.1_B-H1<br>(E val: 3.6424e-04)   |
| <u>B-H1</u>             | MA0168.1_B-H1<br>(E val: 3.8028e-04)   |
| <u>BARHL1</u>           | MA0168.1_B-H1<br>(E val: 5.0670e-05)   |
| <u>Barhl1</u>           | MA0168.1_B-H1<br>(E val: 2.9661e-04)   |
| <u>HAT3.1</u>           | MA0218.1_ct<br>(E val: 8.9984e-04)     |
|                         |                                        |

|                     |                                         |
|---------------------|-----------------------------------------|
| <u>MTR_2g038000</u> | MA0132.1_Pdx1<br>(E val: 2.8654e-02)    |
| <u>59_ATC_TRMAF</u> | MA0434.1_YPR013C<br>(E val: 4.2834e-03) |
| <u>Q9C1N5_COPSC</u> | MA0037.1_GATA3<br>(E val: 5.0444e-03)   |
| <u>Q1WMN0_COPDI</u> | MA0037.1_GATA3<br>(E val: 6.7599e-03)   |
| <u>UM00578</u>      | MA0190.1_Gsc<br>(E val: 1.1501e-02)     |
| <u>AAEL012091</u>   | MA0212.1_bcd<br>(E val: 1.3723e-02)     |
| <u>Hdx</u>          | MA0212.1_bcd<br>(E val: 2.0846e-02)     |
| <u>dharma</u>       | MA0234.1_oc<br>(E val: 4.8065e-04)      |
|                     |                                         |

|                             |                                      |
|-----------------------------|--------------------------------------|
| <u>NEMVEDRAFT_v1g113057</u> | MA0212.1_bcd<br>(E val: 2.6743e-08)  |
| <u>15 TCC RMIKS</u>         | MA0212.1_bcd<br>(E val: 2.6557e-08)  |
| <u>DPRX</u>                 | MA0190.1_Gsc<br>(E val: 2.8082e-08)  |
| <u>RHOXF1</u>               | MA0234.1_oc<br>(E val: 4.4835e-08)   |
| <u>Q8VHG7 MOUSE</u>         | MA0201.1_Ptx1<br>(E val: 2.4983e-10) |
| <u>GSC</u>                  | MA0234.1_oc<br>(E val: 3.9560e-09)   |
| <u>ceh-53</u>               | MA0190.1_Gsc<br>(E val: 4.6874e-09)  |
| <u>gsc</u>                  | MA0190.1_Gsc<br>(E val: 5.2033e-09)  |
|                             |                                      |

|                         |                                     |
|-------------------------|-------------------------------------|
| <u>AGAP006642</u>       | MA0190.1_Gsc<br>(E val: 4.0356e-09) |
| <u>bcd</u>              | MA0190.1_Gsc<br>(E val: 9.0637e-10) |
| <u>DMBX1</u>            | MA0234.1_oc<br>(E val: 8.8704e-09)  |
| <u>Obox6</u>            | MA0190.1_Gsc<br>(E val: 2.0177e-08) |
| <u>Dobox5 CONSTRUCT</u> | MA0190.1_Gsc<br>(E val: 2.6002e-08) |
| <u>Obox1</u>            | MA0190.1_Gsc<br>(E val: 3.5326e-08) |
| <u>13 TCT ATVKA</u>     | MA0234.1_oc<br>(E val: 3.1024e-08)  |
| <u>Gsc</u>              | MA0234.1_oc<br>(E val: 6.2323e-08)  |
|                         |                                     |



|                           |                                        |
|---------------------------|----------------------------------------|
| <u>Dmbx1</u>              | MA0234.1_oc<br>(E val: 4.4797e-05)     |
| <u>Q1WMN9 COPDI</u>       | MA0212.1_bcd<br>(E val: 1.7040e-02)    |
| <u>SNOG 11642</u>         | MA0235.1_onecut<br>(E val: 5.9581e-06) |
| <u>ENSTNIG00000017092</u> | MA0235.1_onecut<br>(E val: 1.9058e-05) |
| <u>HNF1B</u>              | MA0153.1_HNF1B<br>(E val: 5.5378e-13)  |
| <u>HNF1A</u>              | MA0153.1_HNF1B<br>(E val: 6.3727e-14)  |
| <u>ATHB-15</u>            | MA0223.1_exex<br>(E val: 5.4407e-09)   |
| <u>ATHB-9</u>             | MA0186.1_Dfd<br>(E val: 1.5656e-05)    |
|                           |                                        |

|                       |                                        |
|-----------------------|----------------------------------------|
| <u>Duxbl1</u>         | MA0235.1_onecut<br>(E val: 4.4831e-04) |
| <u>HDX</u>            | MA0235.1_onecut<br>(E val: 1.7708e-04) |
| <u>Cphx1</u>          | MA0235.1_onecut<br>(E val: 1.1410e-03) |
| <u>Lhx6 CONSTRUCT</u> | MA0075.1_Prrx2<br>(E val: 2.2088e-04)  |
| <u>WOX13</u>          | MA0070.1_PBX1<br>(E val: 5.5638e-06)   |
| <u>Q00354 COPCI</u>   | MA0316.1_HAP5<br>(E val: 3.4094e-09)   |
| <u>Q00352 COPCI</u>   | MA0060.1_NFYA<br>(E val: 4.3583e-09)   |
| <u>Q68SS9 PLEDJ</u>   | MA0315.1_HAP4<br>(E val: 9.4207e-07)   |
|                       |                                        |

|                      |                                        |
|----------------------|----------------------------------------|
| <u>HOX6</u>          | MA0235.1_onecut<br>(E val: 1.7458e-04) |
| <u>HAT1</u>          | MA0235.1_onecut<br>(E val: 1.4678e-04) |
| <u>hbx5-2</u>        | MA0235.1_onecut<br>(E val: 9.7419e-08) |
| <u>hbx5-1</u>        | MA0070.1_PBX1<br>(E val: 4.1702e-10)   |
| <u>ATHB-7</u>        | MA0070.1_PBX1<br>(E val: 1.0559e-04)   |
| <u>HAT3</u>          | MA0235.1_onecut<br>(E val: 2.3651e-05) |
| <u>GRMZM2G038252</u> | MA0426.1_YHP1<br>(E val: 9.8215e-06)   |
| <u>WUS</u>           | MA0070.1_PBX1<br>(E val: 1.4198e-05)   |
|                      |                                        |

|                             |                                        |
|-----------------------------|----------------------------------------|
| <u>HAT22</u>                | MA0008.1_HAT5<br>(E val: 2.6746e-05)   |
| <u>HAT2</u>                 | MA0008.1_HAT5<br>(E val: 1.8572e-05)   |
| <u>ATHB-X</u>               | MA0110.1_ATHB-5<br>(E val: 1.8404e-07) |
| <u>SNOG_08903</u>           | MA0235.1_onecut<br>(E val: 1.5205e-10) |
| <u>NEMVEDRAFT_v1g101664</u> | MA0070.1_PBX1<br>(E val: 5.5008e-06)   |
| <u>lin-39</u>               | MA0070.1_PBX1<br>(E val: 6.2232e-08)   |
| <u>estExt_gwp_gw1.C_702</u> | MA0235.1_onecut<br>(E val: 4.9964e-03) |
| <u>BARX1</u>                | MA0151.1_ARID3A<br>(E val: 1.2246e-06) |
|                             |                                        |

|                             |                                         |
|-----------------------------|-----------------------------------------|
| <u>NKX6-1</u>               | MA0214.1_bsh<br>(E val: 8.3352e-07)     |
| <u>Q0N4H2 NEMVE</u>         | MA0188.1_Dr<br>(E val: 5.7239e-10)      |
| <u>NEMVEDRAFT_v1g114268</u> | MA0188.1_Dr<br>(E val: 6.9261e-05)      |
| <u>NK7.1</u>                | MA0054.1_myb.Ph3<br>(E val: 5.3691e-06) |
| <u>BARHL2</u>               | MA0054.1_myb.Ph3<br>(E val: 6.5933e-07) |
| <u>304 CTG TTNQK</u>        | MA0188.1_Dr<br>(E val: 1.8802e-04)      |
| <u>PK19166.1</u>            | MA0372.1_RPH1<br>(E val: 9.3146e-09)    |
| <u>Lhx8</u>                 | MA0198.1_OdsH<br>(E val: 9.5457e-08)    |
|                             |                                         |

|                             |                                       |
|-----------------------------|---------------------------------------|
| <u>TLX3</u>                 | MA0188.1_Dr<br>(E val: 1.1926e-03)    |
| <u>Q0N4H7 NEMVE</u>         | MA0094.1_Ubx<br>(E val: 2.9184e-02)   |
| <u>ventx1.1.L</u>           | MA0075.1_Prrx2<br>(E val: 1.2557e-02) |
| <u>LHX2</u>                 | MA0075.1_Prrx2<br>(E val: 8.0794e-03) |
| <u>NEMVEDRAFT v1g129868</u> | MA0075.1_Prrx2<br>(E val: 5.9220e-03) |
| <u>Q0N4H9 NEMVE</u>         | MA0075.1_Prrx2<br>(E val: 2.6414e-02) |
| <u>Hoxa3</u>                | MA0075.1_Prrx2<br>(E val: 4.2577e-03) |
| <u>Barx1</u>                | MA0094.1_Ubx<br>(E val: 4.4172e-03)   |
|                             |                                       |

|                   |                                       |
|-------------------|---------------------------------------|
| <u>Mnx1</u>       | MA0075.1_Prrx2<br>(E val: 4.4611e-03) |
| <u>Nkx1-1</u>     | MA0075.1_Prrx2<br>(E val: 4.6337e-03) |
| <u>Hlx</u>        | MA0075.1_Prrx2<br>(E val: 9.7967e-03) |
| <u>Lmx1b</u>      | MA0075.1_Prrx2<br>(E val: 2.9556e-03) |
| <u>Lmx1a</u>      | MA0075.1_Prrx2<br>(E val: 5.3755e-03) |
| <u>CaO19.4000</u> | MA0075.1_Prrx2<br>(E val: 8.5189e-03) |
| <u>kal-1</u>      | MA0075.1_Prrx2<br>(E val: 6.1057e-03) |
| <u>PHO2</u>       | MA0075.1_Prrx2<br>(E val: 1.2104e-02) |
|                   |                                       |

|                |                                       |
|----------------|---------------------------------------|
| <u>ceh-51</u>  | MA0075.1_Prrx2<br>(E val: 4.0765e-02) |
| <u>UM04928</u> | MA0075.1_Prrx2<br>(E val: 1.3088e-02) |
| <u>otp</u>     | MA0426.1_YHP1<br>(E val: 2.8789e-08)  |
| <u>OdsH</u>    | MA0426.1_YHP1<br>(E val: 2.3854e-08)  |
| <u>Dll</u>     | MA0426.1_YHP1<br>(E val: 2.2713e-08)  |
| <u>Vsx2</u>    | MA0426.1_YHP1<br>(E val: 2.3819e-08)  |
| <u>DLX5</u>    | MA0426.1_YHP1<br>(E val: 2.1206e-08)  |
| <u>DLX4</u>    | MA0426.1_YHP1<br>(E val: 2.6660e-08)  |
|                |                                       |



|             |                                      |
|-------------|--------------------------------------|
| <u>DLX6</u> | MA0426.1_YHP1<br>(E val: 2.4257e-08) |
| <u>DLX1</u> | MA0426.1_YHP1<br>(E val: 3.6604e-08) |
| <u>GBX2</u> | MA0426.1_YHP1<br>(E val: 4.0831e-08) |
| <u>lms</u>  | MA0426.1_YHP1<br>(E val: 3.2934e-08) |
| <u>Rx</u>   | MA0426.1_YHP1<br>(E val: 2.5179e-08) |
| <u>Vsx1</u> | MA0426.1_YHP1<br>(E val: 1.3173e-08) |
| <u>LHX1</u> | MA0426.1_YHP1<br>(E val: 3.7149e-08) |
| <u>Lim1</u> | MA0426.1_YHP1<br>(E val: 4.6222e-08) |
|             |                                      |

|              |                                      |
|--------------|--------------------------------------|
| <u>ESX1</u>  | MA0426.1_YHP1<br>(E val: 9.7762e-08) |
| <u>SHOX2</u> | MA0232.1_lbl<br>(E val: 1.2365e-07)  |
| <u>Shox2</u> | MA0232.1_lbl<br>(E val: 9.8309e-08)  |
| <u>TLX2</u>  | MA0232.1_lbl<br>(E val: 8.2750e-08)  |
| <u>DLX2</u>  | MA0232.1_lbl<br>(E val: 1.1128e-07)  |
| <u>RAX2</u>  | MA0232.1_lbl<br>(E val: 1.1674e-07)  |
| <u>PRRX1</u> | MA0232.1_lbl<br>(E val: 6.1316e-08)  |
| <u>DLX3</u>  | MA0232.1_lbl<br>(E val: 1.1929e-07)  |
|              |                                      |

|                            |                                      |
|----------------------------|--------------------------------------|
| <u>en</u>                  | MA0426.1_YHP1<br>(E val: 6.3159e-08) |
| <u>Dlx1</u>                | MA0426.1_YHP1<br>(E val: 7.3537e-08) |
| <u>Dlx2</u>                | MA0426.1_YHP1<br>(E val: 8.3123e-08) |
| <u>SNAPOd2T00006620001</u> | MA0426.1_YHP1<br>(E val: 5.3836e-08) |
| <u>ceh-54</u>              | MA0426.1_YHP1<br>(E val: 3.0546e-07) |
| <u>Gbx2</u>                | MA0426.1_YHP1<br>(E val: 2.9462e-07) |
| <u>Gbx1</u>                | MA0426.1_YHP1<br>(E val: 3.9716e-07) |
| <u>AAZ08039</u>            | MA0426.1_YHP1<br>(E val: 2.2824e-07) |
|                            |                                      |

|                     |                                      |
|---------------------|--------------------------------------|
| <u>CG11085</u>      | MA0426.1_YHP1<br>(E val: 2.0173e-08) |
| <u>Hmx</u>          | MA0426.1_YHP1<br>(E val: 4.3245e-08) |
| <u>GBX1</u>         | MA0232.1_lbl<br>(E val: 4.9552e-07)  |
| <u>CG9876</u>       | MA0426.1_YHP1<br>(E val: 4.0548e-07) |
| <u>unpg</u>         | MA0426.1_YHP1<br>(E val: 2.0776e-07) |
| <u>18 TAG RLTQA</u> | MA0426.1_YHP1<br>(E val: 1.1960e-07) |
| <u>ceh-58</u>       | MA0232.1_lbl<br>(E val: 4.0935e-07)  |
| <u>Barhl2</u>       | MA0426.1_YHP1<br>(E val: 5.7920e-07) |
|                     |                                      |

|                           |                                       |
|---------------------------|---------------------------------------|
| <u>ceh-19</u>             | MA0426.1_YHP1<br>(E val: 4.4632e-07)  |
| <u>YHP1</u>               | MA0232.1_lbl<br>(E val: 5.2801e-06)   |
| <u>ATEG 04171</u>         | MA0232.1_lbl<br>(E val: 4.6903e-06)   |
| <u>NCU03266</u>           | MA0196.1_NK7.1<br>(E val: 1.9654e-08) |
| <u>HMX3</u>               | MA0426.1_YHP1<br>(E val: 2.8398e-07)  |
| <u>ENSTNIG00000006040</u> | MA0426.1_YHP1<br>(E val: 8.7845e-07)  |
| <u>Rax</u>                | MA0075.1_Prrx2<br>(E val: 3.8995e-06) |
| <u>ALX4</u>               | MA0075.1_Prrx2<br>(E val: 1.8830e-06) |
|                           |                                       |

|                             |                                       |
|-----------------------------|---------------------------------------|
| <u>Alx3</u>                 | MA0075.1_Prrx2<br>(E val: 8.5973e-07) |
| <u>Dlx5</u>                 | MA0075.1_Prrx2<br>(E val: 1.2097e-06) |
| <u>Prrx1</u>                | MA0075.1_Prrx2<br>(E val: 1.7693e-06) |
| <u>NEMVEDRAFT v1g105595</u> | MA0075.1_Prrx2<br>(E val: 2.2012e-06) |
| <u>Lhx1</u>                 | MA0075.1_Prrx2<br>(E val: 5.0294e-06) |
| <u>LHX3</u>                 | MA0194.1_Lim1<br>(E val: 1.8346e-09)  |
| <u>Dbx1</u>                 | MA0194.1_Lim1<br>(E val: 4.3593e-11)  |
| <u>Dbx</u>                  | MA0194.1_Lim1<br>(E val: 2.3550e-11)  |
|                             |                                       |

|                     |                                      |
|---------------------|--------------------------------------|
| <u>ventx3.2</u>     | MA0194.1_Lim1<br>(E val: 1.7841e-11) |
| <u>CBG00029</u>     | MA0194.1_Lim1<br>(E val: 1.6173e-11) |
| <u>FGRRS 01100</u>  | MA0226.1_hbn<br>(E val: 2.2507e-11)  |
| <u>TIx2</u>         | MA0194.1_Lim1<br>(E val: 2.7621e-10) |
| <u>WOX11</u>        | MA0240.1_repo<br>(E val: 7.1158e-10) |
| <u>Q24782 9CNID</u> | MA0194.1_Lim1<br>(E val: 1.4038e-11) |
| <u>CG32105</u>      | MA0236.1_otp<br>(E val: 3.4164e-11)  |
| <u>pal-1</u>        | MA0448.1_H2.0<br>(E val: 2.2106e-10) |
|                     |                                      |

|                     |                                         |
|---------------------|-----------------------------------------|
| <u>hox12</u>        | MA0174.1_CG42234<br>(E val: 1.3600e-10) |
| <u>HXD12 HETFR</u>  | MA0206.1_abd-A<br>(E val: 9.0750e-11)   |
| <u>ftz</u>          | MA0226.1_hbn<br>(E val: 2.0192e-11)     |
| <u>Hoxc6</u>        | MA0194.1_Lim1<br>(E val: 1.9802e-11)    |
| <u>Hoxc9</u>        | MA0240.1_repo<br>(E val: 7.4846e-10)    |
| <u>H2.0</u>         | MA0448.1_H2.0<br>(E val: 2.5989e-11)    |
| <u>Q0N4F9 NEMVE</u> | MA0180.1_Vsx2<br>(E val: 1.1622e-12)    |
| <u>SPU_026099</u>   | MA0180.1_Vsx2<br>(E val: 8.9306e-13)    |
|                     |                                         |



|                             |                                      |
|-----------------------------|--------------------------------------|
| <u>vab-7</u>                | MA0180.1_Vsx2<br>(E val: 1.7780e-12) |
| <u>ENSTNIG00000004116</u>   | MA0180.1_Vsx2<br>(E val: 5.9242e-13) |
| <u>Smp_158000</u>           | MA0180.1_Vsx2<br>(E val: 4.7229e-13) |
| <u>NEMVEDRAFT_v1g164989</u> | MA0180.1_Vsx2<br>(E val: 7.4326e-12) |
| <u>ARGFX</u>                | MA0180.1_Vsx2<br>(E val: 1.2971e-10) |
| <u>repo</u>                 | MA0240.1_repo<br>(E val: 2.8598e-10) |
| <u>ENSCING00000016045</u>   | MA0180.1_Vsx2<br>(E val: 5.3273e-10) |
| <u>CNK00090</u>             | MA0240.1_repo<br>(E val: 2.3502e-11) |
|                             |                                      |

|                     |                                         |
|---------------------|-----------------------------------------|
| <u>CAD25284</u>     | MA0194.1_Lim1<br>(E val: 1.5897e-11)    |
| <u>O76842 CUPSA</u> | MA0194.1_Lim1<br>(E val: 1.6400e-11)    |
| <u>LMX1A</u>        | MA0172.1_CG11294<br>(E val: 1.7100e-11) |
| <u>HHEX</u>         | MA0172.1_CG11294<br>(E val: 2.1773e-10) |
| <u>lim-4</u>        | MA0181.1_Vsx1<br>(E val: 9.2564e-11)    |
| <u>Sebox</u>        | MA0194.1_Lim1<br>(E val: 2.5830e-10)    |
| <u>Q24780 9CNID</u> | MA0194.1_Lim1<br>(E val: 7.3681e-10)    |
| <u>mix11.S</u>      | MA0194.1_Lim1<br>(E val: 6.0393e-10)    |
|                     |                                         |

|                     |                                         |
|---------------------|-----------------------------------------|
| <u>phx1</u>         | MA0194.1_Lim1<br>(E val: 1.0717e-09)    |
| <u>C4B866 NEMVE</u> | MA0194.1_Lim1<br>(E val: 1.2649e-09)    |
| <u>CNG03450</u>     | MA0444.1_CG34031<br>(E val: 7.7102e-07) |
| <u>hbn</u>          | MA0229.1_inv<br>(E val: 1.1169e-09)     |
| <u>CG5369</u>       | MA0194.1_Lim1<br>(E val: 1.2872e-09)    |
| <u>unc-4</u>        | MA0178.1_CG32105<br>(E val: 1.8305e-08) |
| <u>bsh</u>          | MA0229.1_inv<br>(E val: 3.9607e-11)     |
| <u>Uncx</u>         | MA0172.1_CG11294<br>(E val: 3.7957e-09) |
|                     |                                         |

|                |                                      |
|----------------|--------------------------------------|
| <u>Alx4</u>    | MA0194.1_Lim1<br>(E val: 6.3149e-08) |
| <u>CG2808</u>  | MA0188.1_Dr<br>(E val: 1.4849e-08)   |
| <u>CG11294</u> | MA0229.1_inv<br>(E val: 6.6941e-10)  |
| <u>LHX4</u>    | MA0232.1_lbl<br>(E val: 1.2360e-07)  |
| <u>HGTX</u>    | MA0232.1_lbl<br>(E val: 6.2738e-09)  |
| <u>HOXB2</u>   | MA0232.1_lbl<br>(E val: 1.5599e-08)  |
| <u>NOTO</u>    | MA0232.1_lbl<br>(E val: 1.6063e-08)  |
| <u>NKX6-2</u>  | MA0232.1_lbl<br>(E val: 1.8473e-08)  |
|                |                                      |

|                |                                     |
|----------------|-------------------------------------|
| <u>HOXA2</u>   | MA0232.1_lbl<br>(E val: 8.6640e-09) |
| <u>PDX1</u>    | MA0232.1_lbl<br>(E val: 1.1612e-08) |
| <u>Ubx</u>     | MA0232.1_lbl<br>(E val: 1.5127e-08) |
| <u>Lhx2</u>    | MA0232.1_lbl<br>(E val: 9.1589e-09) |
| <u>Lhx9</u>    | MA0232.1_lbl<br>(E val: 1.1389e-08) |
| <u>EMX1</u>    | MA0232.1_lbl<br>(E val: 1.3018e-08) |
| <u>lab</u>     | MA0232.1_lbl<br>(E val: 1.0849e-08) |
| <u>CG18599</u> | MA0232.1_lbl<br>(E val: 1.9400e-09) |
|                |                                     |

|                     |                                     |
|---------------------|-------------------------------------|
| <u>Meox2</u>        | MA0232.1_lbl<br>(E val: 7.1346e-09) |
| <u>ems</u>          | MA0232.1_lbl<br>(E val: 9.6821e-09) |
| <u>EVX1</u>         | MA0232.1_lbl<br>(E val: 1.2369e-08) |
| <u>EVX2</u>         | MA0232.1_lbl<br>(E val: 1.2336e-08) |
| <u>Lim3</u>         | MA0232.1_lbl<br>(E val: 2.1239e-08) |
| <u>Lhx4</u>         | MA0232.1_lbl<br>(E val: 2.0476e-08) |
| <u>HOXD1</u>        | MA0232.1_lbl<br>(E val: 2.0307e-08) |
| <u>Q9GP48 9TURB</u> | MA0232.1_lbl<br>(E val: 3.8246e-08) |
|                     |                                     |

|                             |                                     |
|-----------------------------|-------------------------------------|
| <u>Q70LF3 ARTSF</u>         | MA0232.1_lbl<br>(E val: 2.7533e-08) |
| <u>NEMVEDRAFT v1g205636</u> | MA0232.1_lbl<br>(E val: 3.7288e-08) |
| <u>MNX1</u>                 | MA0232.1_lbl<br>(E val: 2.6559e-08) |
| <u>DRGX</u>                 | MA0232.1_lbl<br>(E val: 3.1653e-08) |
| <u>EN2</u>                  | MA0232.1_lbl<br>(E val: 3.0403e-08) |
| <u>Prrx2</u>                | MA0232.1_lbl<br>(E val: 2.7448e-08) |
| <u>EN1</u>                  | MA0232.1_lbl<br>(E val: 2.6907e-08) |
| <u>ALX3</u>                 | MA0232.1_lbl<br>(E val: 2.1881e-08) |
|                             |                                     |

|              |                                     |
|--------------|-------------------------------------|
| <u>SHOX</u>  | MA0232.1_lbl<br>(E val: 2.2701e-08) |
| <u>Awh</u>   | MA0232.1_lbl<br>(E val: 1.6501e-08) |
| <u>zfhx4</u> | MA0232.1_lbl<br>(E val: 5.4071e-08) |
| <u>Lhx5</u>  | MA0232.1_lbl<br>(E val: 7.9458e-08) |
| <u>uncx</u>  | MA0232.1_lbl<br>(E val: 9.0879e-08) |
| <u>Lhx3</u>  | MA0232.1_lbl<br>(E val: 6.3907e-08) |
| <u>Hoxa1</u> | MA0232.1_lbl<br>(E val: 3.8787e-08) |
| <u>LHX6</u>  | MA0232.1_lbl<br>(E val: 1.0164e-07) |
|              |                                     |



|                     |                                     |
|---------------------|-------------------------------------|
| <u>Lhx6</u>         | MA0232.1_lbl<br>(E val: 1.2291e-06) |
| <u>prd-b</u>        | MA0232.1_lbl<br>(E val: 7.3149e-07) |
| <u>Q4RRY4 TETNG</u> | MA0232.1_lbl<br>(E val: 2.1430e-07) |
| <u>7 TTA RVLRA</u>  | MA0232.1_lbl<br>(E val: 5.5511e-08) |
| <u>HOXA1</u>        | MA0232.1_lbl<br>(E val: 1.4927e-07) |
| <u>ceh-23</u>       | MA0232.1_lbl<br>(E val: 1.3081e-07) |
| <u>56 ATT HRVQA</u> | MA0232.1_lbl<br>(E val: 1.9416e-07) |
| <u>MIXL1</u>        | MA0232.1_lbl<br>(E val: 2.4876e-07) |
|                     |                                     |

|              |                                     |
|--------------|-------------------------------------|
| <u>slou</u>  | MA0232.1_lbl<br>(E val: 1.4101e-07) |
| <u>En2</u>   | MA0232.1_lbl<br>(E val: 6.0426e-08) |
| <u>Hoxd3</u> | MA0232.1_lbl<br>(E val: 1.0207e-07) |
| <u>GSX1</u>  | MA0232.1_lbl<br>(E val: 6.6879e-08) |
| <u>HOXB5</u> | MA0232.1_lbl<br>(E val: 5.6550e-08) |
| <u>Scr</u>   | MA0232.1_lbl<br>(E val: 4.3130e-08) |
| <u>HOXB8</u> | MA0232.1_lbl<br>(E val: 1.3096e-07) |
| <u>HOXD8</u> | MA0232.1_lbl<br>(E val: 2.2035e-07) |
|              |                                     |

|                     |                                      |
|---------------------|--------------------------------------|
| <u>HOXB6</u>        | MA0232.1_lbl<br>(E val: 3.1744e-08)  |
| <u>HOXA6</u>        | MA0223.1_exex<br>(E val: 8.5000e-08) |
| <u>HOXB1</u>        | MA0223.1_exex<br>(E val: 2.3787e-10) |
| <u>HOXA5</u>        | MA0223.1_exex<br>(E val: 3.9288e-10) |
| <u>Q0N4M8 NEMVE</u> | MA0223.1_exex<br>(E val: 2.3856e-09) |
| <u>GSX2</u>         | MA0232.1_lbl<br>(E val: 8.5976e-09)  |
| <u>abd-A</u>        | MA0223.1_exex<br>(E val: 1.9332e-08) |
| <u>pb</u>           | MA0232.1_lbl<br>(E val: 6.8619e-08)  |
|                     |                                      |

|                           |                                     |
|---------------------------|-------------------------------------|
| <u>HOXB3</u>              | MA0232.1_lbl<br>(E val: 5.6179e-08) |
| <u>NEMVEDRAFT_v1g8907</u> | MA0232.1_lbl<br>(E val: 1.4668e-07) |
| <u>Hoxa2</u>              | MA0232.1_lbl<br>(E val: 3.9527e-08) |
| <u>MEOX2</u>              | MA0232.1_lbl<br>(E val: 7.0922e-08) |
| <u>eve</u>                | MA0241.1_ro<br>(E val: 7.8255e-10)  |
| <u>EMX2</u>               | MA0241.1_ro<br>(E val: 2.5200e-11)  |
| <u>ro</u>                 | MA0241.1_ro<br>(E val: 1.2763e-11)  |
| <u>ap</u>                 | MA0209.1_ap<br>(E val: 1.2763e-11)  |
|                           |                                     |

|             |                                     |
|-------------|-------------------------------------|
| <u>RAX</u>  | MA0202.1_Rx<br>(E val: 5.1507e-11)  |
| <u>inv</u>  | MA0229.1_inv<br>(E val: 6.5503e-15) |
| <u>ind</u>  | MA0228.1_ind<br>(E val: 7.6496e-11) |
| <u>ISX</u>  | MA0241.1_ro<br>(E val: 8.0527e-11)  |
| <u>LBX1</u> | MA0241.1_ro<br>(E val: 4.2517e-10)  |
| <u>pdm3</u> | MA0241.1_ro<br>(E val: 1.8173e-10)  |
| <u>lbl</u>  | MA0241.1_ro<br>(E val: 1.9839e-09)  |
| <u>dve</u>  | MA0241.1_ro<br>(E val: 9.7944e-10)  |
|             |                                     |

|                     |                                      |
|---------------------|--------------------------------------|
| <u>Q9BJW6_9CNID</u> | MA0241.1_ro<br>(E val: 8.0265e-10)   |
| <u>MEOX1</u>        | MA0223.1_exex<br>(E val: 5.9674e-09) |
| <u>exex</u>         | MA0198.1_OdsH<br>(E val: 1.1913e-08) |
| <u>60_ATA_KTVQV</u> | MA0221.1_eve<br>(E val: 4.0308e-10)  |
| <u>LHX9</u>         | MA0232.1_lbl<br>(E val: 2.4650e-07)  |
| <u>POU6F1</u>       | MA0232.1_lbl<br>(E val: 1.9095e-07)  |
| <u>Q86SD7_PODCA</u> | MA0232.1_lbl<br>(E val: 2.5359e-07)  |
| <u>CBG07641</u>     | MA0232.1_lbl<br>(E val: 1.8462e-07)  |
|                     |                                      |

|                            |                                         |
|----------------------------|-----------------------------------------|
| <u>ceh-62</u>              | MA0232.1_lbl<br>(E val: 2.4811e-07)     |
| <u>btn</u>                 | MA0232.1_lbl<br>(E val: 7.5444e-08)     |
| <u>258 ATT RTVQQ</u>       | MA0232.1_lbl<br>(E val: 8.0329e-08)     |
| <u>LMX1B</u>               | MA0232.1_lbl<br>(E val: 2.8185e-07)     |
| <u>SNAPOd2T00006145001</u> | MA0232.1_lbl<br>(E val: 2.6419e-06)     |
| <u>227 TTT YRIAA</u>       | MA0075.1_Prrx2<br>(E val: 6.0657e-06)   |
| <u>CAD26261</u>            | MA0178.1_CG32105<br>(E val: 2.6988e-08) |
| <u>Y749 MIMIV</u>          | MA0346.1_NHP6B<br>(E val: 3.8384e-06)   |
|                            |                                         |

|                            |                                        |
|----------------------------|----------------------------------------|
| <u>NCU09556</u>            | MA0379.1_SIG1<br>(E val: 2.9552e-06)   |
| <u>ATHB-22</u>             | MA0356.1_PHO2<br>(E val: 3.7090e-05)   |
| <u>SNAPOd2T00003340001</u> | MA0232.1_lbl<br>(E val: 6.4014e-06)    |
| <u>CG4328</u>              | MA0182.1_CG4328<br>(E val: 1.4526e-07) |
| <u>hbx10</u>               | MA0182.1_CG4328<br>(E val: 1.1851e-05) |
| <u>Q8I9J5_9BILA</u>        | MA0448.1_H2.0<br>(E val: 3.6600e-05)   |
| <u>Q7M3U4_ACRFO</u>        | MA0075.1_Prrx2<br>(E val: 1.9488e-05)  |
| <u>CBG04010</u>            | MA0206.1_abd-A<br>(E val: 7.7487e-06)  |
|                            |                                        |



|                      |                                        |
|----------------------|----------------------------------------|
| <u>10 TGG KSVMO</u>  | MA0203.1_Scr<br>(E val: 4.2788e-06)    |
| <u>237 TAG YAVNA</u> | MA0238.1_pb<br>(E val: 2.3898e-06)     |
| <u>2 TTT RTVSA</u>   | MA0203.1_Scr<br>(E val: 1.5232e-05)    |
| <u>4 TTC VRVSA</u>   | MA0203.1_Scr<br>(E val: 1.0721e-04)    |
| <u>17 TAT TRVSA</u>  | MA0203.1_Scr<br>(E val: 3.5384e-05)    |
| <u>HDG11</u>         | MA0151.1_ARID3A<br>(E val: 3.6185e-06) |
| <u>HDG7</u>          | MA0170.1_C15<br>(E val: 6.0448e-09)    |
| <u>HDG1</u>          | MA0226.1_hbn<br>(E val: 3.0337e-09)    |
|                      |                                        |

|                      |                                       |
|----------------------|---------------------------------------|
| <u>ANL2</u>          | MA0206.1_abd-A<br>(E val: 4.3694e-06) |
| <u>egl-5</u>         | MA0248.1_tup<br>(E val: 3.1483e-08)   |
| <u>14 TCG KGTQM</u>  | MA0248.1_tup<br>(E val: 4.2624e-08)   |
| <u>NKX6-3</u>        | MA0215.1_btn<br>(E val: 3.0070e-09)   |
| <u>tup</u>           | MA0248.1_tup<br>(E val: 2.1446e-11)   |
| <u>C15</u>           | MA0170.1_C15<br>(E val: 1.2763e-11)   |
| <u>232 TCG IKNQM</u> | MA0248.1_tup<br>(E val: 3.8435e-09)   |
| <u>ATML1</u>         | MA0186.1_Dfd<br>(E val: 8.4622e-05)   |
|                      |                                       |

|                      |                                        |
|----------------------|----------------------------------------|
| <u>226 TTT KMISA</u> | MA0075.1_Prrx2<br>(E val: 2.0502e-04)  |
| <u>Isl1</u>          | MA0132.1_Pdx1<br>(E val: 2.3124e-06)   |
| <u>236 TAG KSTQM</u> | MA0248.1_tup<br>(E val: 4.8824e-06)    |
| <u>NANOG</u>         | MA0214.1_bsh<br>(E val: 1.0306e-04)    |
| <u>Dfd</u>           | MA0232.1_lbl<br>(E val: 1.7692e-06)    |
| <u>HB-5</u>          | MA0110.1_ATHB-5<br>(E val: 2.0816e-07) |
| <u>ATHB-21</u>       | MA0110.1_ATHB-5<br>(E val: 6.3559e-07) |
| <u>ATHB-53</u>       | MA0110.1_ATHB-5<br>(E val: 4.4373e-10) |
|                      |                                        |

|                  |                                      |
|------------------|--------------------------------------|
| <u>HAT5</u>      | MA0008.1_HAT5<br>(E val: 2.8499e-08) |
| <u>ATHB-13</u>   | MA0008.1_HAT5<br>(E val: 4.2208e-08) |
| <u>ATHB-16</u>   | MA0008.1_HAT5<br>(E val: 1.8398e-09) |
| <u>ATHB-20</u>   | MA0008.1_HAT5<br>(E val: 2.7583e-08) |
| <u>ATHB-5</u>    | MA0008.1_HAT5<br>(E val: 1.9168e-07) |
| <u>NCU03070</u>  | MA0216.1_cad<br>(E val: 6.3417e-05)  |
| <u>ATHB-51</u>   | MA0008.1_HAT5<br>(E val: 1.7745e-05) |
| <u>PK20392.1</u> | MA0008.1_HAT5<br>(E val: 9.0427e-05) |
|                  |                                      |

|                |                                        |
|----------------|----------------------------------------|
| <u>ATHB-6</u>  | MA0110.1_ATHB-5<br>(E val: 6.6140e-05) |
| <u>GSC2</u>    | MA0094.1_Ubx<br>(E val: 2.0696e-03)    |
| <u>Isl2</u>    | MA0094.1_Ubx<br>(E val: 3.3589e-03)    |
| <u>Obox3</u>   | MA0094.1_Ubx<br>(E val: 1.7438e-03)    |
| <u>POU5F1B</u> | MA0075.1_Prrx2<br>(E val: 3.0457e-03)  |
| <u>En1</u>     | MA0075.1_Prrx2<br>(E val: 2.1945e-03)  |
| <u>Dlx4</u>    | MA0075.1_Prrx2<br>(E val: 2.1990e-03)  |
| <u>Pdx1</u>    | MA0094.1_Ubx<br>(E val: 2.5080e-03)    |
|                |                                        |

|                     |                                       |
|---------------------|---------------------------------------|
| <u>E5</u>           | MA0075.1_Prrx2<br>(E val: 1.9975e-03) |
| <u>Isx</u>          | MA0094.1_Ubx<br>(E val: 2.0861e-03)   |
| <u>Hoxd1</u>        | MA0075.1_Prrx2<br>(E val: 2.9738e-03) |
| <u>Q6WL90 TRICY</u> | MA0075.1_Prrx2<br>(E val: 1.9260e-03) |
| <u>Otp</u>          | MA0075.1_Prrx2<br>(E val: 2.0878e-03) |
| <u>Rhox6</u>        | MA0094.1_Ubx<br>(E val: 2.0443e-03)   |
| <u>Evx2</u>         | MA0075.1_Prrx2<br>(E val: 2.3487e-03) |
| <u>Hoxb6</u>        | MA0094.1_Ubx<br>(E val: 2.5913e-03)   |
|                     |                                       |

|               |                                       |
|---------------|---------------------------------------|
| <u>Dbx2</u>   | MA0094.1_Ubx<br>(E val: 4.4778e-03)   |
| <u>Hoxd8</u>  | MA0094.1_Ubx<br>(E val: 4.7931e-03)   |
| <u>Obox5</u>  | MA0094.1_Ubx<br>(E val: 2.4391e-03)   |
| <u>Barx2</u>  | MA0094.1_Ubx<br>(E val: 3.1310e-03)   |
| <u>Hoxa5</u>  | MA0094.1_Ubx<br>(E val: 3.3308e-03)   |
| <u>barx1</u>  | MA0075.1_Prrx2<br>(E val: 3.1848e-03) |
| <u>Nkx6-1</u> | MA0075.1_Prrx2<br>(E val: 3.4714e-03) |
| <u>Hoxb3</u>  | MA0075.1_Prrx2<br>(E val: 3.1781e-03) |
|               |                                       |

|               |                                       |
|---------------|---------------------------------------|
| <u>Dlx3</u>   | MA0075.1_Prrx2<br>(E val: 3.2354e-03) |
| <u>Gsx2</u>   | MA0075.1_Prrx2<br>(E val: 3.0869e-03) |
| <u>Evx1</u>   | MA0075.1_Prrx2<br>(E val: 3.1475e-03) |
| <u>Hoxb5</u>  | MA0094.1_Ubx<br>(E val: 3.7479e-03)   |
| <u>Nkx6-3</u> | MA0075.1_Prrx2<br>(E val: 3.8618e-03) |
| <u>Emx2</u>   | MA0075.1_Prrx2<br>(E val: 3.2531e-03) |
| <u>Nkx1-2</u> | MA0075.1_Prrx2<br>(E val: 3.3875e-03) |
| <u>Bsx</u>    | MA0075.1_Prrx2<br>(E val: 3.4670e-03) |
|               |                                       |



|                            |                                       |
|----------------------------|---------------------------------------|
| <u>Lbx2</u>                | MA0094.1_Ubx<br>(E val: 5.3979e-03)   |
| <u>NEMVEDRAFT_v1g81309</u> | MA0075.1_Prrx2<br>(E val: 3.3645e-03) |
| <u>CBG20882</u>            | MA0094.1_Ubx<br>(E val: 4.1346e-03)   |
| <u>Hoxa6</u>               | MA0094.1_Ubx<br>(E val: 3.7532e-03)   |
| <u>ceh-5</u>               | MA0075.1_Prrx2<br>(E val: 3.4502e-03) |
| <u>Nobox</u>               | MA0094.1_Ubx<br>(E val: 4.8980e-03)   |
| <u>Nanog</u>               | MA0075.1_Prrx2<br>(E val: 4.5812e-03) |
| <u>Meox1</u>               | MA0075.1_Prrx2<br>(E val: 4.5297e-03) |
|                            |                                       |

|                             |                                      |
|-----------------------------|--------------------------------------|
| <u>YOX1</u>                 | MA0094.1_Ubx<br>(E val: 1.1609e-02)  |
| <u>NEMVEDRAFT v1g136480</u> | MA0094.1_Ubx<br>(E val: 7.7218e-03)  |
| <u>21 TAC ERVSV</u>         | MA0212.1_bcd<br>(E val: 2.7894e-03)  |
| <u>20 TAC QRVSA</u>         | MA0203.1_Scr<br>(E val: 1.4870e-04)  |
| <u>216 TGC NRVMM</u>        | MA0212.1_bcd<br>(E val: 6.8226e-04)  |
| <u>235 TAT RAVSV</u>        | MA0186.1_Dfd<br>(E val: 9.5367e-04)  |
| <u>229 TTC GRISA</u>        | MA0356.1_PHO2<br>(E val: 1.8486e-03) |
| <u>Hoxb8</u>                | MA0094.1_Ubx<br>(E val: 6.4583e-03)  |
|                             |                                      |

|                 |                                       |
|-----------------|---------------------------------------|
| <u>Hoxc8</u>    | MA0094.1_Ubx<br>(E val: 8.9132e-03)   |
| <u>CBG00023</u> | MA0094.1_Ubx<br>(E val: 5.4028e-03)   |
| <u>Hmx2</u>     | MA0426.1_YHP1<br>(E val: 3.6198e-04)  |
| <u>Hmx1</u>     | MA0426.1_YHP1<br>(E val: 3.2593e-04)  |
| <u>SIX5</u>     | MA0335.1_MET4<br>(E val: 2.1780e-03)  |
| <u>schlank</u>  | MA0193.1_Lag1<br>(E val: 2.2828e-10)  |
| <u>yox1</u>     | MA0075.1_Prrx2<br>(E val: 7.7965e-03) |
| <u>Noto</u>     | MA0075.1_Prrx2<br>(E val: 6.3461e-03) |
|                 |                                       |

|                            |                                           |
|----------------------------|-------------------------------------------|
| <u>UNCX</u>                | MA0075.1_Prrx2<br>(E val: 1.8805e-03)     |
| <u>pha-2</u>               | MA0426.1_YHP1<br>(E val: 4.0154e-02)      |
| <u>CG15696</u>             | MA0426.1_YHP1<br>(E val: 2.0724e-02)      |
| <u>CG34031</u>             | MA0426.1_YHP1<br>(E val: 2.0324e-02)      |
| <u>NEMVEDRAFT v1g80394</u> | MA0426.1_YHP1<br>(E val: 1.3574e-02)      |
| <u>NOBOX</u>               | MA0426.1_YHP1<br>(E val: 3.2827e-02)      |
| <u>IRX5</u>                | MA0328.1_MATALPHA2<br>(E val: 3.9553e-05) |
| <u>MTAL2 KLUDE</u>         | MA0328.1_MATALPHA2<br>(E val: 6.6896e-12) |
|                            |                                           |

|                     |                                           |
|---------------------|-------------------------------------------|
| <u>HMRA2</u>        | MA0328.1_MATALPHA2<br>(E val: 1.7878e-12) |
| <u>Rhox8</u>        | MA0392.1_STB5<br>(E val: 2.3740e-05)      |
| <u>mirr</u>         | MA0233.1_mirr<br>(E val: 1.6159e-06)      |
| <u>ara</u>          | MA0210.1_ara<br>(E val: 1.6159e-06)       |
| <u>caup</u>         | MA0217.1_caup<br>(E val: 1.6159e-06)      |
| <u>CG11617</u>      | MA0173.1_CG11617<br>(E val: 1.4526e-07)   |
| <u>51 CAG MSHWR</u> | MA0217.1_caup<br>(E val: 1.9443e-06)      |
| <u>49 CAT LSQSR</u> | MA0173.1_CG11617<br>(E val: 1.9340e-06)   |
|                     |                                           |

|                      |                                      |
|----------------------|--------------------------------------|
| <u>253 CGT VANSR</u> | MA0217.1_caup<br>(E val: 4.9392e-06) |
| <u>55 CAA LHYVR</u>  | MA0217.1_caup<br>(E val: 8.1367e-06) |
| <u>HMLALPHA2</u>     | MA0210.1_ara<br>(E val: 1.2090e-02)  |
| <u>MATALPHA2</u>     | MA0210.1_ara<br>(E val: 2.0207e-02)  |
| <u>CBG08197</u>      | MA0210.1_ara<br>(E val: 1.5637e-02)  |
| <u>Irx4</u>          | MA0210.1_ara<br>(E val: 8.5641e-03)  |
| <u>Irx6</u>          | MA0210.1_ara<br>(E val: 5.7942e-03)  |
| <u>Irx2</u>          | MA0210.1_ara<br>(E val: 1.6628e-02)  |
|                      |                                      |

|                            |                                           |
|----------------------------|-------------------------------------------|
| <u>Irx5</u>                | MA0210.1_ara<br>(E val: 1.3053e-02)       |
| <u>AGAP009986</u>          | MA0210.1_ara<br>(E val: 2.8411e-02)       |
| <u>Rhox11</u>              | MA0210.1_ara<br>(E val: 2.0801e-02)       |
| <u>MTAL2 P1CAN</u>         | MA0318.1_HMRA2<br>(E val: 1.0682e-01)     |
| <u>IRX1</u>                | MA0328.1_MATALPHA2<br>(E val: 9.6004e-06) |
| <u>IRX3</u>                | MA0328.1_MATALPHA2<br>(E val: 8.9355e-05) |
| <u>FGRRES 07914</u>        | MA0328.1_MATALPHA2<br>(E val: 2.1882e-04) |
| <u>SNAPOd2T00005194001</u> | MA0328.1_MATALPHA2<br>(E val: 1.7656e-04) |
|                            |                                           |

|               |                                      |
|---------------|--------------------------------------|
| <u>ATHB-4</u> | MA0254.1_vv1<br>(E val: 8.1236e-04)  |
| <u>hbx7</u>   | MA0322.1_INO4<br>(E val: 2.4836e-03) |
| <u>IRX2</u>   | MA0207.1_achi<br>(E val: 6.9992e-04) |
| <u>Irx3</u>   | MA0143.1_Sox2<br>(E val: 2.4858e-09) |
| <u>vis</u>    | MA0252.1_vis<br>(E val: 8.8622e-07)  |
| <u>achi</u>   | MA0252.1_vis<br>(E val: 8.7480e-07)  |
| <u>Meis2</u>  | MA0252.1_vis<br>(E val: 6.4391e-06)  |
| <u>MEIS1</u>  | MA0252.1_vis<br>(E val: 6.6419e-06)  |
|               |                                      |



|                     |                                           |
|---------------------|-------------------------------------------|
| <u>Meis3</u>        | MA0227.1_hth<br>(E val: 6.6077e-06)       |
| <u>Meis1</u>        | MA0252.1_vis<br>(E val: 4.1357e-05)       |
| <u>ANHX</u>         | MA0408.1_TOS8<br>(E val: 5.5807e-06)      |
| <u>FGRRES 17152</u> | MA0328.1_MATALPHA2<br>(E val: 7.6247e-08) |
| <u>FGRRES 17150</u> | MA0252.1_vis<br>(E val: 1.0847e-04)       |
| <u>Tgif1</u>        | MA0227.1_hth<br>(E val: 6.8698e-05)       |
| <u>Tgif2</u>        | MA0227.1_hth<br>(E val: 6.9961e-05)       |
| <u>CUP9</u>         | MA0288.1_CUP9<br>(E val: 3.7091e-11)      |
|                     |                                           |

|                      |                                       |
|----------------------|---------------------------------------|
| <u>hbx4</u>          | MA0227.1_hth<br>(E val: 1.0419e-04)   |
| <u>CAGL0H02959g</u>  | MA0227.1_hth<br>(E val: 1.1990e-04)   |
| <u>ANIA_00885</u>    | MA0207.1_achi<br>(E val: 1.9445e-04)  |
| <u>GRMZM2G087741</u> | MA0227.1_hth<br>(E val: 1.3141e-06)   |
| <u>GRMZM2G135447</u> | MA0227.1_hth<br>(E val: 5.9773e-09)   |
| <u>KNAT7</u>         | MA0018.2_CREB1<br>(E val: 2.6336e-07) |
| <u>CBG24578</u>      | MA0207.1_achi<br>(E val: 1.4139e-07)  |
| <u>TGIF2</u>         | MA0227.1_hth<br>(E val: 3.1704e-07)   |
|                      |                                       |

|                |                                      |
|----------------|--------------------------------------|
| <u>TGIF1</u>   | MA0207.1_achi<br>(E val: 1.8587e-07) |
| <u>MEIS3</u>   | MA0227.1_hth<br>(E val: 1.3353e-06)  |
| <u>MEIS2</u>   | MA0207.1_achi<br>(E val: 3.0941e-07) |
| <u>PKNOX1</u>  | MA0227.1_hth<br>(E val: 5.8002e-07)  |
| <u>PKNOX2</u>  | MA0227.1_hth<br>(E val: 5.7190e-07)  |
| <u>TGIF2LY</u> | MA0227.1_hth<br>(E val: 3.0965e-07)  |
| <u>TGIF2LX</u> | MA0227.1_hth<br>(E val: 2.5463e-07)  |
| <u>Pknox2</u>  | MA0207.1_achi<br>(E val: 1.0777e-07) |
|                |                                      |

|                     |                                             |
|---------------------|---------------------------------------------|
| <u>Q5EVH4_OIKDI</u> | MA0227.1_hth<br>(E val: 5.3087e-09)         |
| <u>HOS66</u>        | MA0089.1_NFE2L1_MafG<br>(E val: 2.0629e-02) |
| <u>KNAT4</u>        | MA0089.1_NFE2L1_MafG<br>(E val: 1.2367e-02) |
| <u>Q0ZPQ8_NEMVE</u> | MA0207.1_achi<br>(E val: 1.1053e-02)        |
| <u>KNAT3</u>        | MA0207.1_achi<br>(E val: 1.4978e-02)        |
| <u>PK25034.1</u>    | MA0207.1_achi<br>(E val: 1.4895e-02)        |
| <u>KNAT6</u>        | MA0207.1_achi<br>(E val: 1.6623e-02)        |
| <u>unc-62</u>       | MA0207.1_achi<br>(E val: 1.5344e-02)        |
|                     |                                             |

|                         |                                       |
|-------------------------|---------------------------------------|
| <u>Pknox1</u>           | MA0227.1_hth<br>(E val: 7.0473e-03)   |
| <u>FGRRES 16926 M</u>   | MA0207.1_achi<br>(E val: 1.4605e-02)  |
| <u>FGRRES 17238</u>     | MA0207.1_achi<br>(E val: 2.7682e-02)  |
| <u>CADAORAG00002315</u> | MA0227.1_hth<br>(E val: 2.1428e-02)   |
| <u>ATEG 00670</u>       | MA0227.1_hth<br>(E val: 3.4042e-02)   |
| <u>TVAG 451170</u>      | MA0246.1_so<br>(E val: 1.2975e-03)    |
| <u>TVAG 493070</u>      | MA0129.1_TGA1A<br>(E val: 2.3900e-03) |
| <u>TOS8</u>             | MA0018.2_CREB1<br>(E val: 8.6372e-07) |
|                         |                                       |

|                        |                                       |
|------------------------|---------------------------------------|
| <u>CBG10835</u>        | MA0199.1_Optix<br>(E val: 1.5682e-02) |
| <u>Phyra73700</u>      | MA0199.1_Optix<br>(E val: 1.5829e-02) |
| <u>si_dkey-43p13.5</u> | MA0210.1_ara<br>(E val: 7.5942e-02)   |
| <u>PK24181.1</u>       | MA0227.1_hth<br>(E val: 4.3791e-02)   |
| <u>Six4</u>            | MA0204.1_Six4<br>(E val: 3.2262e-02)  |
| <u>Six2</u>            | MA0246.1_so<br>(E val: 1.2907e-02)    |
| <u>Six1</u>            | MA0246.1_so<br>(E val: 2.2537e-02)    |
| <u>so</u>              | MA0246.1_so<br>(E val: 7.0329e-09)    |
|                        |                                       |

|                       |                                       |
|-----------------------|---------------------------------------|
| <u>SIX2</u>           | MA0246.1_so<br>(E val: 2.7271e-07)    |
| <u>SIX4</u>           | MA0246.1_so<br>(E val: 1.5465e-07)    |
| <u>SIX1</u>           | MA0246.1_so<br>(E val: 9.5689e-05)    |
| <u>ceh-34</u>         | MA0246.1_so<br>(E val: 3.0430e-02)    |
| <u>XP_003689450.1</u> | MA0036.1_GATA2<br>(E val: 5.8039e-02) |
| <u>Q6Y859 MARMO</u>   | MA0199.1_Optix<br>(E val: 5.3920e-03) |
| <u>PRH PETCR</u>      | MA0345.1_NHP6A<br>(E val: 4.6352e-09) |
| <u>hbx2</u>           | MA0379.1_SIG1<br>(E val: 6.3617e-06)  |
|                       |                                       |

|                            |                                         |
|----------------------------|-----------------------------------------|
| <u>PDF2</u>                | MA0277.1_AZF1<br>(E val: 1.1933e-03)    |
| <u>KLLA0 D10043g</u>       | MA0379.1_SIG1<br>(E val: 8.4022e-03)    |
| <u>NEMVEDRAFT v1g81436</u> | MA0216.1_cad<br>(E val: 9.7454e-02)     |
| <u>ANIA 01217</u>          | MA0216.1_cad<br>(E val: 6.6209e-02)     |
| <u>ZHX1</u>                | MA0129.1_TGA1A<br>(E val: 1.0082e-01)   |
| <u>ceh-74</u>              | MA0436.1_YPR022C<br>(E val: 6.6468e-03) |
| <u>CAD25866</u>            | MA0227.1_hth<br>(E val: 2.3133e-03)     |
| <u>NKX2-1</u>              | MA0211.1_bap<br>(E val: 7.5503e-05)     |
|                            |                                         |



|                   |                                             |
|-------------------|---------------------------------------------|
| <u>ATHB-12</u>    | MA0089.1_NFE2L1_MafG<br>(E val: 2.0267e-01) |
| <u>RLT1</u>       | MA0127.1_PEND<br>(E val: 3.5933e-02)        |
| <u>PK25011.1</u>  | MA0089.1_NFE2L1_MafG<br>(E val: 1.5545e-01) |
| <u>CIMG_06089</u> | MA0318.1_HMRA2<br>(E val: 3.1007e-01)       |

---

## Motif Similarity Matches

### 54\_CAA\_LMYQR

*forward*

*reverse compliment*

| <i>Name</i>   | <i>E value</i> | <i>Alignment</i>         | <i>Motif</i> |
|---------------|----------------|--------------------------|--------------|
| MA0217.1_caup | 8.9496e-06     | NCTTGTTARN<br>---TGTTA-- |              |

---

### 42\_CGA\_TFYAA

*forward*

*reverse compliment*

| <i>Name</i> | <i>E value</i> | <i>Alignment</i> | <i>Motif</i> |
|-------------|----------------|------------------|--------------|
|-------------|----------------|------------------|--------------|

|              |            |                        |  |
|--------------|------------|------------------------|--|
| MA0186.1_Dfd | 2.4354e-03 | NCTCGTTAN<br>--TCATTAA |  |
|--------------|------------|------------------------|--|

---

**lbe**

|  | <i>forward</i> | <i>reverse compliment</i> |
|--|----------------|---------------------------|
|--|----------------|---------------------------|

| <i>Name</i> | <i>E value</i> | <i>Alignment</i> | <i>Motif</i> |
|-------------|----------------|------------------|--------------|
|-------------|----------------|------------------|--------------|

|              |            |                        |  |
|--------------|------------|------------------------|--|
| MA0186.1_Dfd | 4.2043e-04 | NNTCGTTA-<br>--TCATTAA |  |
|--------------|------------|------------------------|--|

---

**LBX2**

|  | <i>forward</i> | <i>reverse compliment</i> |
|--|----------------|---------------------------|
|--|----------------|---------------------------|

| <i>Name</i> | <i>E value</i> | <i>Alignment</i> | <i>Motif</i> |
|-------------|----------------|------------------|--------------|
|-------------|----------------|------------------|--------------|

|              |            |                      |  |
|--------------|------------|----------------------|--|
| MA0186.1_Dfd | 5.8346e-08 | CTCRTTAA<br>-TCATTAA |  |
|--------------|------------|----------------------|--|

---

**39\_CTA\_IFNAK**

|  | <i>forward</i> | <i>reverse compliment</i> |
|--|----------------|---------------------------|
|--|----------------|---------------------------|

| <i>Name</i>  | <i>E value</i> | <i>Alignment</i>         | <i>Motif</i> |
|--------------|----------------|--------------------------|--------------|
| MA0231.1_lbe | 8.3745e-06     | NCTMGTTANN<br>--TNRTTA-- |              |

---

**HMBOX1**

| <i>forward</i> |                | <i>reverse compliment</i> |              |
|----------------|----------------|---------------------------|--------------|
| <i>Name</i>    | <i>E value</i> | <i>Alignment</i>          | <i>Motif</i> |
| MA0231.1_lbe   | 4.3822e-07     | NTAACTAGN<br>-TAAYNA--    |              |

---

**38\_CTA\_LHYAK**

| <i>forward</i> |                | <i>reverse compliment</i> |              |
|----------------|----------------|---------------------------|--------------|
| <i>Name</i>    | <i>E value</i> | <i>Alignment</i>          | <i>Motif</i> |
| MA0231.1_lbe   | 7.0847e-07     | NCTAGTTARN<br>--TNRTTA--  |              |

---

**220\_CTG\_LTYQK**

| <i>forward</i> |                | <i>reverse compliment</i> |              |
|----------------|----------------|---------------------------|--------------|
| <i>Name</i>    | <i>E value</i> | <i>Alignment</i>          | <i>Motif</i> |

MA0231.1\_lbe 4.1962e-05

NNTAACYAGN  
--TAAAYNA--

---

**260\_ATA\_KAYNA***forward**reverse compliment**Name**E value**Alignment**Motif*

MA0231.1\_lbe 5.8661e-04

NTNGTTARNN  
-TNRTTA---

---

**223\_CTC\_RTFGK***forward**reverse compliment**Name**E value**Alignment**Motif*

MA0231.1\_lbe 1.4477e-06

NNTAACTAAN  
--TAAAYNA--

---

**252\_CTC\_LRYSK***forward**reverse compliment**Name**E value**Alignment**Motif*

MA0231.1\_lbe 1.8927e-06

NTAGTTANNN  
-TNRTTA---

---

**303\_CTC\_VMNRK***forward**reverse compliment*

| <i>Name</i> | <i>E value</i> | <i>Alignment</i> | <i>Motif</i> |
|-------------|----------------|------------------|--------------|
|-------------|----------------|------------------|--------------|

MA0099.2\_AP1 6.0862e-05

NTGAGTTANN  
-TGAGTCA--

---

**53\_CAC\_ERVSR***forward**reverse compliment*

| <i>Name</i> | <i>E value</i> | <i>Alignment</i> | <i>Motif</i> |
|-------------|----------------|------------------|--------------|
|-------------|----------------|------------------|--------------|

MA0173.1\_CG11617 2.3925e-06

NCGTGTTAA  
--ATGTWAA

---

**46\_CCC\_RLDSK***forward**reverse compliment*

| <i>Name</i> | <i>E value</i> | <i>Alignment</i> | <i>Motif</i> |
|-------------|----------------|------------------|--------------|
|-------------|----------------|------------------|--------------|

MA0421.1\_YDR026C 5.5305e-06

-NCGGGTTAR  
NCCGGGTAAA

---

**44\_CCT\_RGDSK**

|             |                | <i>forward</i>                | <i>reverse compliment</i> |              |
|-------------|----------------|-------------------------------|---------------------------|--------------|
| <i>Name</i> | <i>E value</i> | <i>Alignment</i>              |                           | <i>Motif</i> |
| MA0452.1_Kr | 4.6188e-05     | NTAACCCG-----<br>-TAACCCYTTNN |                           |              |

**218\_CTG\_KQNQK**

|              |                | <i>forward</i>           | <i>reverse compliment</i> |              |
|--------------|----------------|--------------------------|---------------------------|--------------|
| <i>Name</i>  | <i>E value</i> | <i>Alignment</i>         |                           | <i>Motif</i> |
| MA0231.1_lbe | 1.0395e-05     | NNTRGTTAAN<br>--TNRTTA-- |                           |              |

**43\_CCT\_MTNGK**

|             |                | <i>forward</i>   | <i>reverse complement</i> |              |
|-------------|----------------|------------------|---------------------------|--------------|
| <i>Name</i> | <i>E value</i> | <i>Alignment</i> |                           | <i>Motif</i> |

MA0231.1\_lbe 9.6156e-04

NTGGTTAANN  
-TNRTTA---

---

**221\_CTG\_RLYQK***forward**reverse compliment**Name**E value**Alignment**Motif*

MA0231.1\_lbe

4.9698e-05

NNTRGTTAAN  
--TNRTTA--

---

**210\_CCG\_RSNQK***forward**reverse compliment**Name**E value**Alignment**Motif*

MA0231.1\_lbe

2.4988e-04

NTGGTTAANN  
-TNRTTA---

---

**48\_CCA\_EHNAK***forward**reverse compliment**Name**E value**Alignment**Motif*

MA0231.1\_lbe 1.4619e-05

NNTRGTTANN  
--TNRTTA--

---

**256\_CCA\_RLYQK***forward**reverse compliment**Name**E value**Alignment**Motif*

MA0231.1\_lbe 8.6188e-06

NNTRGTTANN  
--TNRTTA--

---

**BSX***forward**reverse compliment**Name**E value**Alignment**Motif*

MA0217.1\_caup 4.8362e-03

NNCGTTAN  
--TGTTA--

---

**PRRX2***forward**reverse compliment**Name**E value**Alignment**Motif*



MA0186.1\_Dfd 2.6340e-03

NNCRTNAN  
-TCATTAA

---

**40\_CGG\_STRER***forward**reverse compliment*

| <i>Name</i>  | <i>E value</i> | <i>Alignment</i>         | <i>Motif</i> |
|--------------|----------------|--------------------------|--------------|
| MA0248.1_tup | 8.8280e-04     | YCCGTTAANN<br>-CMATTAW-- |              |

---

**255\_CCT\_RADGK***forward**reverse compliment*

| <i>Name</i>   | <i>E value</i> | <i>Alignment</i>         | <i>Motif</i> |
|---------------|----------------|--------------------------|--------------|
| MA0217.1_caup | 5.1581e-03     | NNNGGTTANN<br>---TGTTA-- |              |

---

**ceh-57***forward**reverse compliment*

| <i>Name</i> | <i>E value</i> | <i>Alignment</i> | <i>Motif</i> |
|-------------|----------------|------------------|--------------|
|-------------|----------------|------------------|--------------|

MA0217.1\_caup 6.2734e-03

NNNNNTWAN  
---TGTTA-

---

**Hnf1b***forward**reverse compliment**Name**E value**Alignment**Motif*

MA0217.1\_caup 4.2044e-03

NNNGTNNN  
--TGTTA-

---

**Hnf1a***forward**reverse compliment**Name**E value**Alignment**Motif*

MA0217.1\_caup 2.6865e-03

NNNGTTAN  
--TGTTA-

---

**Hmbox1***forward**reverse compliment**Name**E value**Alignment**Motif*

MA0231.1\_lbe 9.7179e-02

NNNACNNN  
-TAA YNA-

---

**271\_AAC\_KLQRF***forward**reverse compliment*

| <i>Name</i>   | <i>E value</i> | <i>Alignment</i>         | <i>Motif</i> |
|---------------|----------------|--------------------------|--------------|
| MA0127.1_PEND | 4.1253e-03     | NCGTYTTANN<br>ANTTCTTATK |              |

---

**203\_GTC\_VQKRF***forward**reverse compliment*

| <i>Name</i>   | <i>E value</i> | <i>Alignment</i>         | <i>Motif</i> |
|---------------|----------------|--------------------------|--------------|
| MA0127.1_PEND | 3.2871e-04     | -YTAAGACGN<br>MATAAGAANT |              |

---

**36\_GAC\_ATRRF***forward**reverse compliment*

| <i>Name</i>   | <i>E value</i> | <i>Alignment</i>         | <i>Motif</i> |
|---------------|----------------|--------------------------|--------------|
| MA0127.1_PEND | 5.6761e-04     | -NTAAGACGN<br>MATAAGAANT |              |

---

**225\_AAC\_SLQRF***forward**reverse compliment*

| <i>Name</i>    | <i>E value</i> | <i>Alignment</i>       | <i>Motif</i> |
|----------------|----------------|------------------------|--------------|
| MA0393.1_STE12 | 2.3663e-03     | NNGTYTTARN<br>-YGTTC-- |              |

---

**34\_GAT\_RTMRY***forward**reverse compliment*

| <i>Name</i>  | <i>E value</i> | <i>Alignment</i>         | <i>Motif</i> |
|--------------|----------------|--------------------------|--------------|
| MA0211.1_bap | 1.1833e-03     | NNYTAAGACN<br>--TTAAGTG- |              |

---

**272\_AAC\_VAQRC***forward**reverse compliment*

| <i>Name</i> | <i>E value</i> | <i>Alignment</i> | <i>Motif</i> |
|-------------|----------------|------------------|--------------|
|-------------|----------------|------------------|--------------|

MA0393.1\_STE12 3.5152e-04

NCGTTTTANN  
-YGTTTCA--

---

**ceh-90***forward**reverse compliment**Name**E value**Alignment**Motif*

MA0393.1\_STE12 1.3427e-03

NGTTTTANN  
YGTTTCA--

---

**250\_GAT\_AGKTF***forward**reverse compliment**Name**E value**Alignment**Motif*

MA0127.1\_PEND 1.6496e-02

NNYTAAGANN-  
-MATAAGAANT

---

**26\_GGT\_ALKNM***forward**reverse compliment**Name**E value**Alignment**Motif*

MA0211.1\_bap 8.8493e-04

NTTAAGGCGN  
-TTAAGTG--

---

**217\_GGG\_KSKEG***forward**reverse compliment**Name**E value**Alignment**Motif*

MA0211.1\_bap

4.4540e-05

NNYTAAGGGN  
--TTAAGTG-

---

**247\_GCG\_RTDRS***forward**reverse compliment**Name**E value**Alignment**Motif*

MA0211.1\_bap

1.2248e-03

NKKCTTARNN  
-CACTTAA--

---

**37\_GAA\_RFQKF***forward**reverse compliment**Name**E value**Alignment**Motif*

MA0127.1\_PEND 4.5636e-06

NTTAAGAASN  
MATAAGAANT

---

**Q0ZPQ4\_NEMVE***forward**reverse compliment*

| <i>Name</i>   | <i>E value</i> | <i>Alignment</i>         | <i>Motif</i> |
|---------------|----------------|--------------------------|--------------|
| MA0127.1_PEND | 1.6660e-08     | -TTAAGAAG-<br>MATAAGAANT |              |

---

**268\_AAT\_KLQAF***forward**reverse compliment*

| <i>Name</i>  | <i>E value</i> | <i>Alignment</i>         | <i>Motif</i> |
|--------------|----------------|--------------------------|--------------|
| MA0211.1_bap | 1.1050e-05     | NTWCTTAANN<br>-CACTTAA-- |              |

---

**75\_AAC\_SISRF***forward**reverse compliment*

| <i>Name</i> | <i>E value</i> | <i>Alignment</i> | <i>Motif</i> |
|-------------|----------------|------------------|--------------|
|-------------|----------------|------------------|--------------|

MA0211.1\_bap 8.0890e-04

NNTCTTAANN  
-CACTTAA--

---

**308\_GCG\_RLDRF***forward**reverse compliment**Name**E value**Alignment**Motif*

MA0211.1\_bap 8.1581e-04

NNTCTTAANN  
-CACTTAA--

---

**270\_AAG\_RAQWF***forward**reverse compliment**Name**E value**Alignment**Motif*

MA0053.1\_MNB1A 2.4849e-02

CCTYTTNNNN  
NCTTT-----

---

**76\_AAA\_RAQWF***forward**reverse compliment**Name**E value**Alignment**Motif*



MA0211.1\_bap 8.9918e-04

CCTYTTAANN  
-CACTTAA--

---

**243\_GGT\_ATKSM***forward**reverse compliment*

| <i>Name</i>     | <i>E value</i> | <i>Alignment</i>         | <i>Motif</i> |
|-----------------|----------------|--------------------------|--------------|
| MA0124.1_NKX3-1 | 6.9614e-06     | NTMCTTARNN<br>ATACTTA--- |              |

---

**64\_AGA\_AFRAH***forward**reverse compliment*

| <i>Name</i>  | <i>E value</i> | <i>Alignment</i>         | <i>Motif</i> |
|--------------|----------------|--------------------------|--------------|
| MA0211.1_bap | 5.1182e-06     | NNTMCTTAAN<br>--CACTTAA- |              |

---

**73\_AAT\_KLTAF***forward**reverse compliment*

| <i>Name</i> | <i>E value</i> | <i>Alignment</i> | <i>Motif</i> |
|-------------|----------------|------------------|--------------|
|-------------|----------------|------------------|--------------|

MA0211.1\_bap 8.0708e-07

NTACTTARNN  
-CACTTAA--

---

**208\_CTC\_HFNRK***forward**reverse compliment**Name**E value**Alignment**Motif*

MA0211.1\_bap

1.6084e-05

NCKASTTAAN  
--CACTTAA-

---

**310\_GTC\_YRRGA***forward**reverse compliment**Name**E value**Alignment**Motif*

MA0124.1\_NKX3-1 1.3755e-06

NNYTAAGTAN  
---TAAGTAT

---

**242\_GTC\_LQRGA***forward**reverse compliment**Name**E value**Alignment**Motif*

MA0124.1\_NKX3-1 1.3807e-06

NNNTAAGTAN  
---TAAGTAT

---

**241\_GTT\_GLRAF***forward**reverse compliment**Name**E value**Alignment**Motif*

MA0124.1\_NKX3-1 1.5270e-06

NNNTAAGTAN  
---TAAGTAT

---

**205\_GAA\_TQRQW***forward**reverse compliment**Name**E value**Alignment**Motif*

MA0124.1\_NKX3-1 1.8120e-06

NNNTAAGTAN  
---TAAGTAT

---

**263\_AGA\_VRFAA***forward**reverse compliment**Name**E value**Alignment**Motif*

MA0124.1\_NKX3-1 2.0316e-06

NNTACTTANN  
-ATACTTA--

---

**Q70HR3\_PLEPI***forward**reverse compliment**Name**E value**Alignment**Motif*

MA0124.1\_NKX3-1 1.7532e-06

NTAAGTANNN  
-TAAGTAT--

---

**249\_GCA\_QLKQS***forward**reverse compliment**Name**E value**Alignment**Motif*

MA0124.1\_NKX3-1 7.5248e-04

NNNNAAGTAN  
---TAAGTAT

---

**ceh-22***forward**reverse compliment**Name**E value**Alignment**Motif*

MA0211.1\_bap 4.4240e-08

NNNCACTTNA  
---CACTTAA**vnd***forward**reverse compliment**Name**E value**Alignment**Motif*

MA0253.1\_vnd

1.1102e-16

YACTTGARA  
YACTTGARA**24\_GTG\_HLIQY***forward**reverse compliment**Name**E value**Alignment**Motif*

MA0211.1\_bap

1.9677e-06

NNNTAAGTGN  
--TTAAGTG-**bap***forward**reverse compliment**Name**E value**Alignment**Motif*

MA0211.1\_bap

2.1113e-06

NNCACTTANN  
--CACTTAA-

---

**ISL1**

| <i>forward</i> |                | <i>reverse compliment</i> |              |
|----------------|----------------|---------------------------|--------------|
| <i>Name</i>    | <i>E value</i> | <i>Alignment</i>          | <i>Motif</i> |
| MA0211.1_bap   | 7.7296e-07     | SCACTTAN<br>-CACTTAA      |              |

---

**ISL2**

| <i>forward</i> |                | <i>reverse compliment</i> |              |
|----------------|----------------|---------------------------|--------------|
| <i>Name</i>    | <i>E value</i> | <i>Alignment</i>          | <i>Motif</i> |
| MA0211.1_bap   | 6.2608e-07     | NCACTTAN<br>-CACTTAA      |              |

---

**HMX1**

| <i>forward</i>  |                | <i>reverse compliment</i> |              |
|-----------------|----------------|---------------------------|--------------|
| <i>Name</i>     | <i>E value</i> | <i>Alignment</i>          | <i>Motif</i> |
| MA0063.1_Nkx2-5 | 2.2710e-06     | NCAMTTANN<br>-CAMTTAW-    |              |

---

**HMX2**

|              | <i>forward</i> | <i>reverse compliment</i> |              |
|--------------|----------------|---------------------------|--------------|
| <i>Name</i>  | <i>E value</i> | <i>Alignment</i>          | <i>Motif</i> |
| MA0211.1_bap | 1.1516e-08     | NCACTTRNC<br>-CACTTAA-    |              |

---

**NKX3-2**

|              | <i>forward</i> | <i>reverse compliment</i> |              |
|--------------|----------------|---------------------------|--------------|
| <i>Name</i>  | <i>E value</i> | <i>Alignment</i>          | <i>Motif</i> |
| MA0211.1_bap | 2.0976e-06     | NCCACTTANN<br>--CACTTAA-  |              |

---

**NKX3-1**

|             | <i>forward</i> | <i>reverse compliment</i> |              |
|-------------|----------------|---------------------------|--------------|
| <i>Name</i> | <i>E value</i> | <i>Alignment</i>          | <i>Motif</i> |

MA0211.1\_bap 2.0256e-06

NNTAAGTGGN  
-TTAAGTG--

---

**Nkx2-6***forward**reverse compliment**Name**E value**Alignment**Motif*

MA0211.1\_bap

7.4956e-04

NNNCACTTNN  
---CACTTAA

---

**Nkx3-1***forward**reverse compliment**Name**E value**Alignment**Motif*

MA0211.1\_bap

8.3180e-04

NNNCACTTNN  
---CACTTAA

---

**Nkx2-9***forward**reverse compliment**Name**E value**Alignment**Motif*



MA0211.1\_bap 1.9645e-03

NNRAGTRNNN  
TTAAGTG---

---

**Nkx2-1***forward**reverse compliment**Name**E value**Alignment**Motif*

MA0211.1\_bap 9.7504e-04

NYNCTYNN  
-CACTTAA

---

**Nkx2-2***forward**reverse compliment**Name**E value**Alignment**Motif*

MA0211.1\_bap 2.2528e-03

NYNCTYNNN  
-CACTTAA-

---

**Nkx3-2***forward**reverse compliment**Name**E value**Alignment**Motif*

MA0211.1\_bap 6.6546e-04

NNYACTTNN  
--CACTTAA

---

**scro***forward**reverse compliment**Name**E value**Alignment**Motif*

MA0211.1\_bap

1.4217e-03

NCACTYNNN  
-CACTTAA-

---

**Nkx2-4***forward**reverse compliment**Name**E value**Alignment**Motif*

MA0211.1\_bap

2.2018e-03

NNRAGNRNNN  
TTAAGTG---

---

**NEMVEDRAFT\_v1g197288***forward**reverse compliment**Name**E value**Alignment**Motif*

MA0211.1\_bap 2.4841e-03

NNNYACTTNN  
---CACTTAA

---

**ceh-24***forward**reverse compliment**Name**E value**Alignment**Motif*

MA0211.1\_bap

5.8321e-02

NNYNCTYNN  
--CACTTAA

---

**ENSCING00000007395***forward**reverse compliment**Name**E value**Alignment**Motif*

MA0211.1\_bap

3.0174e-02

NWNNNNNN  
CACTTAA-

---

**Hoxb9***forward**reverse compliment**Name**E value**Alignment**Motif*

MA0165.1\_Abd-B 1.0286e-03

NNNNRTWAAN  
--TMATAAA--

---

**CBG23031***forward**reverse compliment*

| <i>Name</i> | <i>E value</i> | <i>Alignment</i> | <i>Motif</i> |
|-------------|----------------|------------------|--------------|
|-------------|----------------|------------------|--------------|

MA0174.1\_CG42234 8.4823e-04

NNNNATWAAN  
--TMATWAA--

---

**Hoxc11***forward**reverse compliment*

| <i>Name</i> | <i>E value</i> | <i>Alignment</i> | <i>Motif</i> |
|-------------|----------------|------------------|--------------|
|-------------|----------------|------------------|--------------|

MA0165.1\_Abd-B 2.3036e-03

NNNNRTWAAN  
--TMATAAA--

---

**Hoxa9***forward**reverse compliment*

| <i>Name</i> | <i>E value</i> | <i>Alignment</i> | <i>Motif</i> |
|-------------|----------------|------------------|--------------|
|-------------|----------------|------------------|--------------|

MA0307.1\_GLN3 6.1601e-03

NNNNNNNN  
-TTATC--

---

**Hoxd10***forward**reverse compliment**Name**E value**Alignment**Motif*

MA0307.1\_GLN3 4.1907e-03

NNNNNNNN  
-TTATC--

---

**Hoxd11***forward**reverse compliment**Name**E value**Alignment**Motif*

MA0307.1\_GLN3 1.4126e-02

NNNNNNNN  
-TTATC--

---

**Hoxa10***forward**reverse compliment**Name**E value**Alignment**Motif*

MA0307.1\_GLN3 8.7847e-03

NNNNNTNNN  
---GATAA-

---

**Cdx2***forward**reverse compliment**Name**E value**Alignment**Motif*

MA0307.1\_GLN3 8.2090e-03

NWWATNRNN  
-TTATC---

---

**Cdx1***forward**reverse compliment**Name**E value**Alignment**Motif*

MA0307.1\_GLN3 7.8786e-03

NNWATNRNN  
-TTATC---

---

**Hoxc10***forward**reverse compliment**Name**E value**Alignment**Motif*

MA0165.1\_Abd-B 2.4823e-08

NTTTAYGAC  
--TTATKA-

---

**HOXB9**

| <i>forward</i> |                | <i>reverse compliment</i> |              |
|----------------|----------------|---------------------------|--------------|
| <i>Name</i>    | <i>E value</i> | <i>Alignment</i>          | <i>Motif</i> |
| MA0165.1_Abd-B | 2.2251e-06     | GTCGTAAAAN<br>-TMATAAA--  |              |

---

**Abd-B**

| <i>forward</i> |                | <i>reverse compliment</i>  |              |
|----------------|----------------|----------------------------|--------------|
| <i>Name</i>    | <i>E value</i> | <i>Alignment</i>           | <i>Motif</i> |
| MA0165.1_Abd-B | 1.4554e-06     | NGTCGTAAAWN<br>--TMATAAA-- |              |

---

**HOXA10**

| <i>forward</i> |                | <i>reverse compliment</i> |              |
|----------------|----------------|---------------------------|--------------|
| <i>Name</i>    | <i>E value</i> | <i>Alignment</i>          | <i>Motif</i> |

MA0165.1\_Abd-B 7.2371e-06

NTTTTACGACN  
--TTTATKA--

---

**HOXA11***forward**reverse compliment**Name**E value**Alignment**Motif*

MA0165.1\_Abd-B 2.0449e-05

NGTCGTAAAAAN  
--TMATAAA--

---

**Hoxa11***forward**reverse compliment**Name**E value**Alignment**Motif*

MA0165.1\_Abd-B 6.8791e-06

NNTCGTAAANNN  
--TMATAAA---

---

**HOXD11***forward**reverse compliment**Name**E value**Alignment**Motif*



MA0153.1\_HNF1B 2.3770e-05

NRTC GTAAANNNTWAN  
----GTTAAWYATTAA

---

**HOXC11***forward**reverse compliment**Name**E value**Alignment**Motif*

MA0165.1\_Abd-B 6.4582e-06

NNTTTACGAYN  
--TTTATKA--

---

**HOXD12***forward**reverse compliment**Name**E value**Alignment**Motif*

MA0165.1\_Abd-B 1.5126e-05

NRTC GTAAAN  
--TMATAAA--

---

**HOXA9***forward**reverse compliment**Name**E value**Alignment**Motif*

MA0165.1\_Abd-B 4.9453e-07

NNNTTTAYGAYN  
---TTTATKA--

---

**CDX2**

| <i>forward</i> |                | <i>reverse compliment</i> |              |
|----------------|----------------|---------------------------|--------------|
| <i>Name</i>    | <i>E value</i> | <i>Alignment</i>          | <i>Motif</i> |
| MA0165.1_Abd-B | 1.8242e-04     | NRTYRTAANN<br>--TMATAAA-- |              |

---

**HOXC10**

| <i>forward</i> |                | <i>reverse compliment</i>  |              |
|----------------|----------------|----------------------------|--------------|
| <i>Name</i>    | <i>E value</i> | <i>Alignment</i>           | <i>Motif</i> |
| MA0216.1_cad   | 2.9939e-09     | NNTTTATKRCN<br>--TTTATTR-- |              |

---

**HOXC9**

| <i>forward</i> |                | <i>reverse compliment</i> |              |
|----------------|----------------|---------------------------|--------------|
| <i>Name</i>    | <i>E value</i> | <i>Alignment</i>          | <i>Motif</i> |
| MA0216.1_cad   | 1.5245e-08     | NGCMATAAAN<br>--YAATAAA-- |              |

---

**HOXC12**

|              | <i>forward</i> | <i>reverse compliment</i>  |              |
|--------------|----------------|----------------------------|--------------|
| <i>Name</i>  | <i>E value</i> | <i>Alignment</i>           | <i>Motif</i> |
| MA0216.1_cad | 4.7854e-09     | NGTAATAAAAN<br>--YAATAAA-- |              |

---

**cad**

|              | <i>forward</i> | <i>reverse compliment</i>    |              |
|--------------|----------------|------------------------------|--------------|
| <i>Name</i>  | <i>E value</i> | <i>Alignment</i>             | <i>Motif</i> |
| MA0216.1_cad | 2.2162e-08     | NNGCMATAAAAN<br>---YAATAAA-- |              |

---

**HOXD9**

|             | <i>forward</i> | <i>reverse compliment</i> |              |
|-------------|----------------|---------------------------|--------------|
| <i>Name</i> | <i>E value</i> | <i>Alignment</i>          | <i>Motif</i> |

MA0216.1\_cad 6.3975e-10

GCAATAAAAN  
-YAATAAA--

---

**HOXD10***forward**reverse compliment**Name**E value**Alignment**Motif*

MA0216.1\_cad 5.7397e-10

GYMATAAAAN  
-YAATAAA--

---

**CDX1***forward**reverse compliment**Name**E value**Alignment**Motif*

MA0216.1\_cad 1.0263e-07

NTTTTATGGCN  
--TTTATTR--

---

**Hoxd9***forward**reverse compliment**Name**E value**Alignment**Motif*

MA0165.1\_Abd-B 4.1215e-07

NCCATWAAA  
-TMATAAA-

---

**Cdx4**

|              |                | <i>forward</i>               | <i>reverse compliment</i> |
|--------------|----------------|------------------------------|---------------------------|
| <i>Name</i>  | <i>E value</i> | <i>Alignment</i>             | <i>Motif</i>              |
| MA0216.1_cad | 4.8203e-07     | NNCNATAAATCA<br>--YAATAAA--- |                           |

---

**Hoxc12**

|                 |                | <i>forward</i>           | <i>reverse compliment</i> |
|-----------------|----------------|--------------------------|---------------------------|
| <i>Name</i>     | <i>E value</i> | <i>Alignment</i>         | <i>Motif</i>              |
| MA0151.1_ARID3A | 3.9486e-02     | NNTWAYNNNN<br>-TTTAAT--- |                           |

---

**Hoxd12\_CONSTRUCT**

|             |                | <i>forward</i>   | <i>reverse compliment</i> |
|-------------|----------------|------------------|---------------------------|
| <i>Name</i> | <i>E value</i> | <i>Alignment</i> | <i>Motif</i>              |

MA0151.1\_ARID3A 4.2453e-02

NNTNAYNNNN  
-TTTAAT---

---

**264\_ACT\_KVYHV***forward**reverse compliment**Name**E value**Alignment**Motif*

MA0297.1\_FKH2 6.6792e-04

NNGTTTANNN  
-TGTTTAC--

---

**267\_ACA\_RVSHT***forward**reverse compliment**Name**E value**Alignment**Motif*

MA0297.1\_FKH2 1.1765e-06

NTGTTTAANN  
-TGTTTAC--

---

**B-H2***forward**reverse compliment**Name**E value**Alignment**Motif*

MA0168.1\_B-H1 3.6424e-04

NNCGTTTANN  
--CAATTAA--

---

**B-H1***forward**reverse compliment**Name**E value**Alignment**Motif*

MA0168.1\_B-H1 3.8028e-04

NNCGTTTANN  
--CAATTAA--

---

**BARHL1***forward**reverse compliment**Name**E value**Alignment**Motif*

MA0168.1\_B-H1 5.0670e-05

NCGTTTAN  
-CAATTAA

---

**Barhl1***forward**reverse compliment**Name**E value**Alignment**Motif*

MA0168.1\_B-H1 2.9661e-04

NNCRTTTANN  
--CAATTAA--

---

**HAT3.1**

| <i>forward</i> |                | <i>reverse compliment</i> |              |
|----------------|----------------|---------------------------|--------------|
| <i>Name</i>    | <i>E value</i> | <i>Alignment</i>          | <i>Motif</i> |
| MA0218.1_ct    | 8.9984e-04     | NTRMACCNNN<br>TTRAAC----  |              |

---

**MTR\_2g038000**

| <i>forward</i> |                | <i>reverse compliment</i> |              |
|----------------|----------------|---------------------------|--------------|
| <i>Name</i>    | <i>E value</i> | <i>Alignment</i>          | <i>Motif</i> |
| MA0132.1_Pdx1  | 2.8654e-02     | NNNNNAGNNN<br>-AATTAG---  |              |

---

**59\_ATC\_TRMAF**

| <i>forward</i> |                | <i>reverse compliment</i> |              |
|----------------|----------------|---------------------------|--------------|
| <i>Name</i>    | <i>E value</i> | <i>Alignment</i>          | <i>Motif</i> |



MA0434.1\_YPR013C 4.2834e-03

-GATTTANNNN  
NGATYTACN--

---

**Q9C1N5\_COPSC***forward**reverse compliment**Name**E value**Alignment**Motif*

MA0037.1\_GATA3 5.0444e-03

NNCAATCNN  
--YTATCN-

---

**Q1WMN0\_COPDI***forward**reverse compliment**Name**E value**Alignment**Motif*

MA0037.1\_GATA3 6.7599e-03

NNCAATCNN  
--YTATCN-

---

**UM00578***forward**reverse compliment**Name**E value**Alignment**Motif*

MA0190.1\_Gsc 1.1501e-02

NNGATNNNN  
-GGATTA--

---

**AAEL012091***forward**reverse compliment**Name**E value**Alignment**Motif*

MA0212.1\_bcd 1.3723e-02

NNGATNNNN  
-GGATTA--

---

**Hdx***forward**reverse compliment**Name**E value**Alignment**Motif*

MA0212.1\_bcd 2.0846e-02

NNATNNN  
GGATTA-

---

**dharm***forward**reverse compliment**Name**E value**Alignment**Motif*

MA0234.1\_oc 4.8065e-04

NNNATCC  
-TAATCC

---

**NEMVEDRAFT\_v1g113057***forward**reverse compliment*

| <i>Name</i>  | <i>E value</i> | <i>Alignment</i>         | <i>Motif</i> |
|--------------|----------------|--------------------------|--------------|
| MA0212.1_bcd | 2.6743e-08     | NNGGATTARN<br>--GGATTA-- |              |

---

**15\_TCC\_RMIKS***forward**reverse compliment*

| <i>Name</i>  | <i>E value</i> | <i>Alignment</i>         | <i>Motif</i> |
|--------------|----------------|--------------------------|--------------|
| MA0212.1_bcd | 2.6557e-08     | NGGATTARNN<br>-GGATTA--- |              |

---

**DPRX***forward**reverse compliment*

| <i>Name</i> | <i>E value</i> | <i>Alignment</i> | <i>Motif</i> |
|-------------|----------------|------------------|--------------|
|-------------|----------------|------------------|--------------|

MA0190.1\_Gsc 2.8082e-08

NGGATTATCN  
-GGATTA---

---

**RHOXF1***forward**reverse compliment**Name**E value**Alignment**Motif*

MA0234.1\_oc

4.4835e-08

GGATNATCN  
GGATTA---

---

**Q8VHG7\_MOUSE***forward**reverse compliment**Name**E value**Alignment**Motif*

MA0201.1\_Ptx1

2.4983e-10

NGGATTAW  
-GGATTAA

---

**GSC***forward**reverse compliment**Name**E value**Alignment**Motif*

MA0234.1\_oc 3.9560e-09

NTAATCCN  
-TAATCC-

---

**ceh-53***forward**reverse compliment**Name**E value**Alignment**Motif*

MA0190.1\_Gsc 4.6874e-09

NRGATTAN  
-GGATTA-

---

**gsc***forward**reverse compliment**Name**E value**Alignment**Motif*

MA0190.1\_Gsc 5.2033e-09

NGGATTAN  
-GGATTA-

---

**AGAP006642***forward**reverse compliment**Name**E value**Alignment**Motif*

MA0190.1\_Gsc 4.0356e-09

GGATTANN  
GGATTA--

---

**bcd***forward**reverse compliment**Name**E value**Alignment**Motif*

MA0190.1\_Gsc 9.0637e-10

GGATTAN  
GGATTA-

---

**DMBX1***forward**reverse compliment**Name**E value**Alignment**Motif*

MA0234.1\_oc 8.8704e-09

NGGATTAN  
-GGATTA-

---

**Obox6***forward**reverse compliment**Name**E value**Alignment**Motif*

MA0190.1\_Gsc 2.0177e-08

NNRGATTAN  
--GGATTA-

---

**Dobox5\_CONSTRUCT***forward* *reverse compliment**Name* *E value* *Alignment* *Motif*

MA0190.1\_Gsc 2.6002e-08

NTAATCYNN  
-TAATCC--

---

**Obox1***forward* *reverse compliment**Name* *E value* *Alignment* *Motif*

MA0190.1\_Gsc 3.5326e-08

NNNGGATTAN  
---GGATTA-

---

**13\_TCT\_ATVKA***forward* *reverse compliment**Name* *E value* *Alignment* *Motif*

MA0234.1\_oc 3.1024e-08

NGGATTARNN  
-GGATTA---

---

**Gsc***forward**reverse compliment**Name**E value**Alignment**Motif*

MA0234.1\_oc

6.2323e-08

TAATCCNNTWA  
TAATCC-----

---

**Dmbx1***forward**reverse compliment**Name**E value**Alignment**Motif*

MA0234.1\_oc

4.4797e-05

NNRGATTAN  
--GGATTA-

---

**Q1WMN9\_COPDI***forward**reverse compliment**Name**E value**Alignment**Motif*



MA0212.1\_bcd 1.7040e-02

NNGATTNNNN  
-GGATTA---

---

**SNOG\_11642***forward**reverse compliment**Name**E value**Alignment**Motif*

MA0235.1\_onecut 5.9581e-06

NNTAATCAWNN  
--NAATCAA--

---

**ENSTNIG00000017092***forward**reverse compliment**Name**E value**Alignment**Motif*

MA0235.1\_onecut 1.9058e-05

NTAATCAN  
-NAATCAA

---

**HNF1B***forward**reverse compliment**Name**E value**Alignment**Motif*

MA0153.1\_HNF1B 5.5378e-13

RTTAATNATTAAC  
GTAAWYATTAA-

---

**HNF1A***forward**reverse compliment**Name**E value**Alignment**Motif*

MA0153.1\_HNF1B 6.3727e-14

NRTTAATNATTAACN  
--TTAATRWTTAAC-

---

**ATHB-15***forward**reverse compliment**Name**E value**Alignment**Motif*

MA0223.1\_exex 5.4407e-09

AATAATTACT  
--TAATTAN-

---

**ATHB-9***forward**reverse compliment**Name**E value**Alignment**Motif*

MA0186.1\_Dfd 1.5656e-05

NTAATCATTAYNWTN  
----TCATTAA----

---

**Duxbl1***forward**reverse compliment**Name**E value**Alignment**Motif*

MA0235.1\_onecut 4.4831e-04

NNYAATCAN  
--NAATCAA

---

**HDX***forward**reverse compliment**Name**E value**Alignment**Motif*

MA0235.1\_onecut 1.7708e-04

NNNNNNN-  
-NAATCAA

---

**Cphx1***forward**reverse compliment**Name**E value**Alignment**Motif*

MA0235.1\_onecut 1.1410e-03

NNNNNNATCW-  
----NAATCAA

---

**Lhx6\_CONSTRUCT**

|                | <i>forward</i> | <i>reverse compliment</i> |              |
|----------------|----------------|---------------------------|--------------|
| <i>Name</i>    | <i>E value</i> | <i>Alignment</i>          | <i>Motif</i> |
| MA0075.1_Prrx2 | 2.2088e-04     | NNTRATTRN<br>--TAATT--    |              |

---

**WOX13**

|               | <i>forward</i> | <i>reverse compliment</i>    |              |
|---------------|----------------|------------------------------|--------------|
| <i>Name</i>   | <i>E value</i> | <i>Alignment</i>             | <i>Motif</i> |
| MA0070.1_PBX1 | 5.5638e-06     | NNTGATTGAN--<br>NTTGATTGATNN |              |

---

**Q00354\_COPCI**

|             | <i>forward</i> | <i>reverse compliment</i> |              |
|-------------|----------------|---------------------------|--------------|
| <i>Name</i> | <i>E value</i> | <i>Alignment</i>          | <i>Motif</i> |

MA0316.1\_HAP5 3.4094e-09

ACCAATCN-----  
ACCAATNAGMNNSSN

---

**Q00352\_COPCI***forward**reverse compliment*

| <i>Name</i>   | <i>E value</i> | <i>Alignment</i>                     | <i>Motif</i> |
|---------------|----------------|--------------------------------------|--------------|
| MA0060.1_NFYA | 4.3583e-09     | ----TGATTGGTT---<br>NNNCYSATTGGYYNNN |              |

---

**Q68SS9\_PLEDJ***forward**reverse compliment*

| <i>Name</i>   | <i>E value</i> | <i>Alignment</i>                 | <i>Motif</i> |
|---------------|----------------|----------------------------------|--------------|
| MA0315.1_HAP4 | 9.4207e-07     | NNCAATCN-----<br>NCCAATCARNNNNNN |              |

---

**HOX6***forward**reverse compliment*

| <i>Name</i> | <i>E value</i> | <i>Alignment</i> | <i>Motif</i> |
|-------------|----------------|------------------|--------------|
|-------------|----------------|------------------|--------------|

MA0235.1\_onecut 1.7458e-04

NNNCAATCAN  
---NAATCAA

---

**HAT1***forward**reverse compliment**Name**E value**Alignment**Motif*

MA0235.1\_onecut 1.4678e-04

NYAATCATNN  
-NAATCAA--

---

**hb5-2***forward**reverse compliment**Name**E value**Alignment**Motif*

MA0235.1\_onecut 9.7419e-08

NYAATCAW  
-NAATCAA

---

**hb5-1***forward**reverse compliment**Name**E value**Alignment**Motif*

MA0070.1\_PBX1 4.1702e-10

-TTGATTGR---  
NTTGATTGATNN

---

**ATHB-7***forward**reverse compliment**Name**E value**Alignment**Motif*

MA0070.1\_PBX1 1.0559e-04

NNATGATTGN---  
-NTTGATTGATNN

---

**HAT3***forward**reverse compliment**Name**E value**Alignment**Motif*

MA0235.1\_onecut 2.3651e-05

NYAATCAN  
-NAATCAA

---

**GRMZM2G038252***forward**reverse compliment**Name**E value**Alignment**Motif*

MA0426.1\_YHP1 9.8215e-06

NCAATCAN  
-CAATTA-

---

**WUS***forward**reverse compliment**Name**E value**Alignment**Motif*

MA0070.1\_PBX1 1.4198e-05

TGAWTGAWTGA---  
--NTTGATTGATNN

---

**HAT22***forward**reverse compliment**Name**E value**Alignment**Motif*

MA0008.1\_HAT5 2.6746e-05

AATGATTRNN  
AATAATTN--

---

**HAT2***forward**reverse compliment**Name**E value**Alignment**Motif*



MA0008.1\_HAT5 1.8572e-05

NNAATGATTRN  
--AATAATTN-

---

**ATHB-X***forward**reverse compliment*

| <i>Name</i>     | <i>E value</i> | <i>Alignment</i>           | <i>Motif</i> |
|-----------------|----------------|----------------------------|--------------|
| MA0110.1_ATHB-5 | 1.8404e-07     | NNAATRATTGN<br>--AATMATTGN |              |

---

**SNOG\_08903***forward**reverse compliment*

| <i>Name</i>     | <i>E value</i> | <i>Alignment</i>     | <i>Motif</i> |
|-----------------|----------------|----------------------|--------------|
| MA0235.1_onecut | 1.5205e-10     | YAAATCAA<br>-NAATCAA |              |

---

**NEMVEDRAFT\_v1g101664***forward**reverse compliment*

| <i>Name</i> | <i>E value</i> | <i>Alignment</i> | <i>Motif</i> |
|-------------|----------------|------------------|--------------|
|-------------|----------------|------------------|--------------|

MA0070.1\_PBX1 5.5008e-06

---GATYGATT--  
NTTGATTGATNN

---

**lin-39**

|               | <i>forward</i> | <i>reverse compliment</i>    |              |
|---------------|----------------|------------------------------|--------------|
| <i>Name</i>   | <i>E value</i> | <i>Alignment</i>             | <i>Motif</i> |
| MA0070.1_PBX1 | 6.2232e-08     | -CATCAATC---<br>NNATCAATCAAN |              |

---

**estExt\_gwp\_gw1.C\_702**

|                 | <i>forward</i> | <i>reverse compliment</i> |              |
|-----------------|----------------|---------------------------|--------------|
| <i>Name</i>     | <i>E value</i> | <i>Alignment</i>          | <i>Motif</i> |
| MA0235.1_onecut | 4.9964e-03     | NAATNANNNNN<br>NAATCAA--- |              |

---

**BARX1**

|             | <i>forward</i> | <i>reverse compliment</i> |              |
|-------------|----------------|---------------------------|--------------|
| <i>Name</i> | <i>E value</i> | <i>Alignment</i>          | <i>Motif</i> |

MA0151.1\_ARID3A 1.2246e-06

NNATTAAAWANCNATTA  
--ATTAAA-----

---

**NKX6-1**

|              | <i>forward</i> | <i>reverse compliment</i>            |              |
|--------------|----------------|--------------------------------------|--------------|
| <i>Name</i>  | <i>E value</i> | <i>Alignment</i>                     | <i>Motif</i> |
| MA0214.1_bsh | 8.3352e-07     | NATYAWWWNNNMATTWNTN<br>-----YMATTA-- |              |

---

**Q0N4H2\_NEMVE**

|             | <i>forward</i> | <i>reverse compliment</i> |              |
|-------------|----------------|---------------------------|--------------|
| <i>Name</i> | <i>E value</i> | <i>Alignment</i>          | <i>Motif</i> |
| MA0188.1_Dr | 5.7239e-10     | TAATTRNT<br>TAATTGG-      |              |

---

**NEMVEDRAFT\_v1g114268**

|             | <i>forward</i> | <i>reverse compliment</i> |              |
|-------------|----------------|---------------------------|--------------|
| <i>Name</i> | <i>E value</i> | <i>Alignment</i>          | <i>Motif</i> |

MA0188.1\_Dr 6.9261e-05

NTAATNGRT  
-TAATTGG-

---

**NK7.1***forward**reverse compliment*

| <i>Name</i>      | <i>E value</i> | <i>Alignment</i>             | <i>Motif</i> |
|------------------|----------------|------------------------------|--------------|
| MA0054.1_myb.Ph3 | 5.3691e-06     | -NACCGTTTAAN<br>TAACNGTTW--- |              |

---

**BARHL2***forward**reverse compliment*

| <i>Name</i>      | <i>E value</i> | <i>Alignment</i>           | <i>Motif</i> |
|------------------|----------------|----------------------------|--------------|
| MA0054.1_myb.Ph3 | 6.5933e-07     | NTAAACGNT--<br>--WAACNGTTA |              |

---

**304\_CTG\_TTNQK***forward**reverse compliment*

| <i>Name</i> | <i>E value</i> | <i>Alignment</i>         | <i>Motif</i> |
|-------------|----------------|--------------------------|--------------|
| MA0188.1_Dr | 1.8802e-04     | CCRGTTANNN<br>CCAATTA--- |              |

---

**PK19166.1**

| <i>forward</i> |                | <i>reverse compliment</i> |              |
|----------------|----------------|---------------------------|--------------|
| <i>Name</i>    | <i>E value</i> | <i>Alignment</i>          | <i>Motif</i> |
| MA0372.1_RPH1  | 9.3146e-09     | RTTAGGGG-<br>-TTAGGGGN    |              |

---

**Lhx8**

| <i>forward</i> |                | <i>reverse compliment</i>           |              |
|----------------|----------------|-------------------------------------|--------------|
| <i>Name</i>    | <i>E value</i> | <i>Alignment</i>                    | <i>Motif</i> |
| MA0198.1_OdsH  | 9.5457e-08     | NTRATTANNNNTRATTAN<br>-----YTAATTR- |              |

---

**TLX3**

| <i>forward</i> |                | <i>reverse compliment</i>                 |              |
|----------------|----------------|-------------------------------------------|--------------|
| <i>Name</i>    | <i>E value</i> | <i>Alignment</i>                          | <i>Motif</i> |
| MA0188.1_Dr    | 1.1926e-03     | NAATTGNNNNNNNNNNNNNCAATTN<br>TAATTGG----- |              |

---

**Q0N4H7\_NEMVE**

|              |                | <i>forward</i>           | <i>reverse compliment</i> |
|--------------|----------------|--------------------------|---------------------------|
| <i>Name</i>  | <i>E value</i> | <i>Alignment</i>         | <i>Motif</i>              |
| MA0094.1_Ubx | 2.9184e-02     | NNNNNATNNN<br>-----ATT-- |                           |

---

**ventx1.1.L**

|                |                | <i>forward</i>           | <i>reverse compliment</i> |
|----------------|----------------|--------------------------|---------------------------|
| <i>Name</i>    | <i>E value</i> | <i>Alignment</i>         | <i>Motif</i>              |
| MA0075.1_Prrx2 | 1.2557e-02     | NNNNNNNNNN<br>--TAATT--- |                           |

---

**LHX2**

|             |                | <i>forward</i>   | <i>reverse compliment</i> |
|-------------|----------------|------------------|---------------------------|
| <i>Name</i> | <i>E value</i> | <i>Alignment</i> | <i>Motif</i>              |

MA0075.1\_Prrx2 8.0794e-03

NNNNAANNNN  
---TAATT--

---

**NEMVEDRAFT\_v1g129868***forward**reverse compliment*

| <i>Name</i>    | <i>E value</i> | <i>Alignment</i>       | <i>Motif</i> |
|----------------|----------------|------------------------|--------------|
| MA0075.1_Prrx2 | 5.9220e-03     | NYNANNNNN<br>-TAATT--- |              |

---

**Q0N4H9\_NEMVE***forward**reverse compliment*

| <i>Name</i>    | <i>E value</i> | <i>Alignment</i>       | <i>Motif</i> |
|----------------|----------------|------------------------|--------------|
| MA0075.1_Prrx2 | 2.6414e-02     | NNYRANNNN<br>--TAATT-- |              |

---

**Hoxa3***forward**reverse compliment*

| <i>Name</i> | <i>E value</i> | <i>Alignment</i> | <i>Motif</i> |
|-------------|----------------|------------------|--------------|
|-------------|----------------|------------------|--------------|

MA0075.1\_Prrx2 4.2577e-03

NTAATNRNNN  
-TAATT----

---

**Barx1***forward**reverse compliment**Name**E value**Alignment**Motif*

MA0094.1\_Ubx 4.4172e-03

NNNNATTANN  
----ATTA--

---

**Mnx1***forward**reverse compliment**Name**E value**Alignment**Motif*

MA0075.1\_Prrx2 4.4611e-03

NTAATNNNNN  
-TAATT----

---

**Nkx1-1***forward**reverse compliment**Name**E value**Alignment**Motif*



MA0075.1\_Prrx2 4.6337e-03

NNNNATTANN  
---AATTA--

---

**Hlx***forward**reverse compliment**Name**E value**Alignment**Motif*

MA0075.1\_Prrx2 9.7967e-03

NNWTNNN  
TAATT--

---

**Lmx1b***forward**reverse compliment**Name**E value**Alignment**Motif*

MA0075.1\_Prrx2 2.9556e-03

NTNATNN  
-TAATT-

---

**Lmx1a***forward**reverse compliment**Name**E value**Alignment**Motif*

MA0075.1\_Prrx2 5.3755e-03

NYNATNNN  
-TAATT--

---

**CaO19.4000***forward**reverse compliment*

| <i>Name</i> | <i>E value</i> | <i>Alignment</i> | <i>Motif</i> |
|-------------|----------------|------------------|--------------|
|-------------|----------------|------------------|--------------|

MA0075.1\_Prrx2 8.5189e-03

NYAATNNNN  
-TAATT---

---

**kal-1***forward**reverse compliment*

| <i>Name</i> | <i>E value</i> | <i>Alignment</i> | <i>Motif</i> |
|-------------|----------------|------------------|--------------|
|-------------|----------------|------------------|--------------|

MA0075.1\_Prrx2 6.1057e-03

NNNNANNN  
--TAATT-

---

**PHO2***forward**reverse compliment*

| <i>Name</i> | <i>E value</i> | <i>Alignment</i> | <i>Motif</i> |
|-------------|----------------|------------------|--------------|
|-------------|----------------|------------------|--------------|

MA0075.1\_Prrx2 1.2104e-02

NNNATNNNNN  
-TAATT----

---

**ceh-51***forward**reverse compliment**Name**E value**Alignment**Motif*

MA0075.1\_Prrx2 4.0765e-02

NNYNATNNN  
--TAATT--

---

**UM04928***forward**reverse compliment**Name**E value**Alignment**Motif*

MA0075.1\_Prrx2 1.3088e-02

NNNNNATNNN  
---TAATT--

---

**otp***forward**reverse compliment**Name**E value**Alignment**Motif*

MA0426.1\_YHP1 2.8789e-08

NYAATTAN  
-CAATTA-

---

**OdsH***forward**reverse compliment**Name**E value**Alignment**Motif*

MA0426.1\_YHP1 2.3854e-08

NYAATTAN  
-CAATTA-

---

**DII***forward**reverse compliment**Name**E value**Alignment**Motif*

MA0426.1\_YHP1 2.2713e-08

NYAATTAN  
-CAATTA-

---

**Vsx2***forward**reverse compliment**Name**E value**Alignment**Motif*

MA0426.1\_YHP1 2.3819e-08

NYAATTAN  
-CAATTA-

---

**DLX5***forward**reverse compliment**Name**E value**Alignment**Motif*

MA0426.1\_YHP1 2.1206e-08

NTAATTGN  
-TAATTG-

---

**DLX4***forward**reverse compliment**Name**E value**Alignment**Motif*

MA0426.1\_YHP1 2.6660e-08

NCAATTAN  
-CAATTA-

---

**DLX6***forward**reverse compliment**Name**E value**Alignment**Motif*

MA0426.1\_YHP1 2.4257e-08

NCAATTAN  
-CAATTA-

---

**DLX1**

|               | <i>forward</i> | <i>reverse compliment</i> |              |
|---------------|----------------|---------------------------|--------------|
| <i>Name</i>   | <i>E value</i> | <i>Alignment</i>          | <i>Motif</i> |
| MA0426.1_YHP1 | 3.6604e-08     | NYAATTAN<br>-CAATTA-      |              |

---

**GBX2**

|               | <i>forward</i> | <i>reverse compliment</i> |              |
|---------------|----------------|---------------------------|--------------|
| <i>Name</i>   | <i>E value</i> | <i>Alignment</i>          | <i>Motif</i> |
| MA0426.1_YHP1 | 4.0831e-08     | NTAATTRN<br>-TAATTG-      |              |

---

**lms**

|             | <i>forward</i> | <i>reverse compliment</i> |              |
|-------------|----------------|---------------------------|--------------|
| <i>Name</i> | <i>E value</i> | <i>Alignment</i>          | <i>Motif</i> |

MA0426.1\_YHP1 3.2934e-08

NTAATTRN  
-TAATTG-

---

**Rx***forward**reverse compliment**Name**E value**Alignment**Motif*

MA0426.1\_YHP1 2.5179e-08

NYAATTAN  
-CAATTA-

---

**Vsx1***forward**reverse compliment**Name**E value**Alignment**Motif*

MA0426.1\_YHP1 1.3173e-08

NCAATTAN  
-CAATTA-

---

**LHX1***forward**reverse compliment**Name**E value**Alignment**Motif*

MA0426.1\_YHP1 3.7149e-08

NYNATTAN  
-CAATTA-

---

**Lim1***forward**reverse compliment**Name**E value**Alignment**Motif*

MA0426.1\_YHP1 4.6222e-08

NYAATTAN  
-CAATTA-

---

**ESX1***forward**reverse compliment**Name**E value**Alignment**Motif*

MA0426.1\_YHP1 9.7762e-08

NYAATTAN  
-CAATTA-

---

**SHOX2***forward**reverse compliment**Name**E value**Alignment**Motif*



MA0232.1\_lbl 1.2365e-07

NYAATTAN  
-TMATTA-

---

**Shox2***forward**reverse compliment**Name**E value**Alignment**Motif*

MA0232.1\_lbl

9.8309e-08

NYAATTAN  
-TMATTA-

---

**TLX2***forward**reverse compliment**Name**E value**Alignment**Motif*

MA0232.1\_lbl

8.2750e-08

NYAATTAN  
-TMATTA-

---

**DLX2***forward**reverse compliment**Name**E value**Alignment**Motif*

MA0232.1\_lbl

1.1128e-07

NYAATTAN  
-TMATTA-

---

**RAX2**

| <i>forward</i> |                | <i>reverse compliment</i> |              |
|----------------|----------------|---------------------------|--------------|
| <i>Name</i>    | <i>E value</i> | <i>Alignment</i>          | <i>Motif</i> |
| MA0232.1_lbl   | 1.1674e-07     | NTAATTRN<br>-TAATKA-      |              |

---

**PRRX1**

| <i>forward</i> |                | <i>reverse compliment</i> |              |
|----------------|----------------|---------------------------|--------------|
| <i>Name</i>    | <i>E value</i> | <i>Alignment</i>          | <i>Motif</i> |
| MA0232.1_lbl   | 6.1316e-08     | NTAATTRN<br>-TAATKA-      |              |

---

**DLX3**

| <i>forward</i> |                | <i>reverse compliment</i> |              |
|----------------|----------------|---------------------------|--------------|
| <i>Name</i>    | <i>E value</i> | <i>Alignment</i>          | <i>Motif</i> |

MA0232.1\_lbl 1.1929e-07

NYAATTAN  
-TMATTA-

---

**en***forward**reverse compliment**Name**E value**Alignment**Motif*

MA0426.1\_YHP1 6.3159e-08

NTAATTRN  
-TAATTG-

---

**Dlx1***forward**reverse compliment**Name**E value**Alignment**Motif*

MA0426.1\_YHP1 7.3537e-08

NYAATTAN  
-CAATTA-

---

**Dlx2***forward**reverse compliment**Name**E value**Alignment**Motif*

MA0426.1\_YHP1 8.3123e-08

NYAATTAN  
-CAATTA-

---

**SNAPOd2T00006620001***forward**reverse compliment*

| <i>Name</i>   | <i>E value</i> | <i>Alignment</i>     | <i>Motif</i> |
|---------------|----------------|----------------------|--------------|
| MA0426.1_YHP1 | 5.3836e-08     | NTAATTRN<br>-TAATTG- |              |

---

**ceh-54***forward**reverse compliment*

| <i>Name</i>   | <i>E value</i> | <i>Alignment</i>       | <i>Motif</i> |
|---------------|----------------|------------------------|--------------|
| MA0426.1_YHP1 | 3.0546e-07     | NNYAATTAN<br>--CAATTA- |              |

---

**Gbx2***forward**reverse compliment*

| <i>Name</i> | <i>E value</i> | <i>Alignment</i> | <i>Motif</i> |
|-------------|----------------|------------------|--------------|
|-------------|----------------|------------------|--------------|

MA0426.1\_YHP1 2.9462e-07

NNYAATTANN  
--CAATTA--

---

**Gbx1***forward**reverse compliment**Name**E value**Alignment**Motif*

MA0426.1\_YHP1 3.9716e-07

NNYAATTANN  
--CAATTA--

---

**AAZ08039***forward**reverse compliment**Name**E value**Alignment**Motif*

MA0426.1\_YHP1 2.2824e-07

NNTAATTRNN  
--TAATTG--

---

**CG11085***forward**reverse compliment**Name**E value**Alignment**Motif*

MA0426.1\_YHP1 2.0173e-08

NCRATTAN  
-CAATTA-

---

**Hmx***forward**reverse compliment**Name**E value**Alignment**Motif*

MA0426.1\_YHP1 4.3245e-08

NTAAKTGN  
-TAATTG-

---

**GBX1***forward**reverse compliment**Name**E value**Alignment**Motif*

MA0232.1\_lbl 4.9552e-07

NSYAATTANN  
--TMATTA--

---

**CG9876***forward**reverse compliment**Name**E value**Alignment**Motif*

MA0426.1\_YHP1 4.0548e-07

NNYRATTANS  
--CAATTA--

---

**unpg***forward**reverse compliment**Name**E value**Alignment**Motif*

MA0426.1\_YHP1 2.0776e-07

NNCAATTANN  
--CAATTA--

---

**18\_TAG\_RLTQA***forward**reverse compliment**Name**E value**Alignment**Motif*

MA0426.1\_YHP1 1.1960e-07

NNCAATTARN  
--CAATTA--

---

**ceh-58***forward**reverse compliment**Name**E value**Alignment**Motif*

MA0232.1\_lbl 4.0935e-07

NNYAATTANN  
--TMATTA--

---

**Barhl2***forward**reverse compliment**Name**E value**Alignment**Motif*

MA0426.1\_YHP1 5.7920e-07

NNYNNTTAN  
--CAATTA--

---

**ceh-19***forward**reverse compliment**Name**E value**Alignment**Motif*

MA0426.1\_YHP1 4.4632e-07

NNCNATTAN  
--CAATTA--

---

**YHP1***forward**reverse compliment**Name**E value**Alignment**Motif*



MA0232.1\_lbl 5.2801e-06

NNYAATWWN  
--TMATTA-

---

**ATEG\_04171***forward**reverse compliment**Name**E value**Alignment**Motif*

MA0232.1\_lbl 4.6903e-06

NNNYAATTWN  
---TMATTA-

---

**NCU03266***forward**reverse compliment**Name**E value**Alignment**Motif*

MA0196.1\_NK7.1 1.9654e-08

NYNATTWNNN  
-CAATTAA--

---

**HMX3***forward**reverse compliment**Name**E value**Alignment**Motif*

MA0426.1\_YHP1 2.8398e-07

NNCAMTTANNN  
--CAATTA---

---

**ENSTNIG00000006040***forward**reverse compliment*

| <i>Name</i>   | <i>E value</i> | <i>Alignment</i>               | <i>Motif</i> |
|---------------|----------------|--------------------------------|--------------|
| MA0426.1_YHP1 | 8.7845e-07     | NNNYNATTANNNN<br>---CAATTA---- |              |

---

**Rax***forward**reverse compliment*

| <i>Name</i>    | <i>E value</i> | <i>Alignment</i>       | <i>Motif</i> |
|----------------|----------------|------------------------|--------------|
| MA0075.1_Prrx2 | 3.8995e-06     | NNTAATTNN<br>--TAATT-- |              |

---

**ALX4***forward**reverse compliment*

| <i>Name</i> | <i>E value</i> | <i>Alignment</i> | <i>Motif</i> |
|-------------|----------------|------------------|--------------|
|-------------|----------------|------------------|--------------|

MA0075.1\_Prrx2 1.8830e-06

NTAATTRN  
-TAATT--

---

**Alx3**

|                | <i>forward</i> | <i>reverse compliment</i> |              |
|----------------|----------------|---------------------------|--------------|
| <i>Name</i>    | <i>E value</i> | <i>Alignment</i>          | <i>Motif</i> |
| MA0075.1_Prrx2 | 8.5973e-07     | TAATNNN<br>TAATT--        |              |

---

**Dlx5**

|                | <i>forward</i> | <i>reverse compliment</i> |              |
|----------------|----------------|---------------------------|--------------|
| <i>Name</i>    | <i>E value</i> | <i>Alignment</i>          | <i>Motif</i> |
| MA0075.1_Prrx2 | 1.2097e-06     | WAATNNN<br>TAATT--        |              |

---

**Prrx1**

|             | <i>forward</i> | <i>reverse compliment</i> |              |
|-------------|----------------|---------------------------|--------------|
| <i>Name</i> | <i>E value</i> | <i>Alignment</i>          | <i>Motif</i> |

MA0075.1\_Prrx2 1.7693e-06

TAATTNNN  
TAATT---

---

**NEMVEDRAFT\_v1g105595***forward**reverse compliment**Name**E value**Alignment**Motif*

MA0075.1\_Prrx2 2.2012e-06

NTAATTNN  
-TAATT--

---

**Lhx1***forward**reverse compliment**Name**E value**Alignment**Motif*

MA0075.1\_Prrx2 5.0294e-06

TAATNNNNN  
TAATT----

---

**LHX3***forward**reverse compliment**Name**E value**Alignment**Motif*

MA0194.1\_Lim1 1.8346e-09

NNTAATTAAWTNN  
--TAATTAA----

---

**Dbx1**

|               | <i>forward</i> | <i>reverse compliment</i> |              |
|---------------|----------------|---------------------------|--------------|
| <i>Name</i>   | <i>E value</i> | <i>Alignment</i>          | <i>Motif</i> |
| MA0194.1_Lim1 | 4.3593e-11     | ATTAATTA<br>-TTAATTA      |              |

---

**Dbx**

|               | <i>forward</i> | <i>reverse compliment</i> |              |
|---------------|----------------|---------------------------|--------------|
| <i>Name</i>   | <i>E value</i> | <i>Alignment</i>          | <i>Motif</i> |
| MA0194.1_Lim1 | 2.3550e-11     | ATTAATTA<br>-TTAATTA      |              |

---

**ventx3.2**

|               | <i>forward</i> | <i>reverse compliment</i> |              |
|---------------|----------------|---------------------------|--------------|
| <i>Name</i>   | <i>E value</i> | <i>Alignment</i>          | <i>Motif</i> |
| MA0194.1_Lim1 | 1.7841e-11     | ATTAATTA<br>-TTAATTA      |              |

---

**CBG00029**

| <i>forward</i> |                | <i>reverse compliment</i> |              |
|----------------|----------------|---------------------------|--------------|
| <i>Name</i>    | <i>E value</i> | <i>Alignment</i>          | <i>Motif</i> |
| MA0194.1_Lim1  | 1.6173e-11     | TAATTAAT<br>TAATTAA-      |              |

---

**FGRRS\_01100**

| <i>forward</i> |                | <i>reverse compliment</i> |              |
|----------------|----------------|---------------------------|--------------|
| <i>Name</i>    | <i>E value</i> | <i>Alignment</i>          | <i>Motif</i> |
| MA0226.1_hbn   | 2.2507e-11     | YAATTAAW<br>YAATTAA-      |              |

---

**Tlx2**

| <i>forward</i> |                | <i>reverse compliment</i> |              |
|----------------|----------------|---------------------------|--------------|
| <i>Name</i>    | <i>E value</i> | <i>Alignment</i>          | <i>Motif</i> |

MA0194.1\_Lim1 2.7621e-10

TAWTTAAT  
TAATTAA-

---

**WOX11***forward**reverse compliment**Name**E value**Alignment**Motif*

MA0240.1\_repo 7.1158e-10

NNTAATTAAANT  
--TAATTAA--

---

**Q24782\_9CNID***forward**reverse compliment**Name**E value**Alignment**Motif*

MA0194.1\_Lim1 1.4038e-11

TTAATTAA  
-TAATTAA

---

**CG32105***forward**reverse compliment**Name**E value**Alignment**Motif*

MA0236.1\_otp 3.4164e-11

TTAATTAR  
-TAATTAR

---

**pal-1***forward**reverse compliment**Name**E value**Alignment**Motif*

MA0448.1\_H2.0 2.2106e-10

TTWATTAC  
NTWATNA-

---

**hox12***forward**reverse compliment**Name**E value**Alignment**Motif*

MA0174.1\_CG42234 1.3600e-10

GTMATWAA  
-TMATWAA

---

**HXD12\_HETFR***forward**reverse compliment**Name**E value**Alignment**Motif*

MA0206.1\_abd-A 9.0750e-11

GTAATTAA  
-TAATTAA



---

**ftz**

|              |                | <i>forward</i>       | <i>reverse compliment</i> |              |
|--------------|----------------|----------------------|---------------------------|--------------|
| <i>Name</i>  | <i>E value</i> | <i>Alignment</i>     |                           | <i>Motif</i> |
| MA0226.1_hbn | 2.0192e-11     | GTAATTAA<br>-YAATTAA |                           |              |

---

**Hoxc6**

|               |                | <i>forward</i>       | <i>reverse compliment</i> |              |
|---------------|----------------|----------------------|---------------------------|--------------|
| <i>Name</i>   | <i>E value</i> | <i>Alignment</i>     |                           | <i>Motif</i> |
| MA0194.1_Lim1 | 1.9802e-11     | RTAATTAA<br>-TAATTAA |                           |              |

---

**Hoxc9**

|             |                | <i>forward</i>   | <i>reverse compliment</i> |              |
|-------------|----------------|------------------|---------------------------|--------------|
| <i>Name</i> | <i>E value</i> | <i>Alignment</i> |                           | <i>Motif</i> |
|             |                |                  |                           |              |

MA0240.1\_repo 7.4846e-10

NGTAATTAAN  
--TAATTAA-

---

**H2.0***forward**reverse compliment**Name**E value**Alignment**Motif*

MA0448.1\_H2.0 2.5989e-11

TNATWAA  
TNATWAN

---

**Q0N4F9\_NEMVE***forward**reverse compliment**Name**E value**Alignment**Motif*

MA0180.1\_Vsx2 1.1622e-12

MTAATTAN-  
CTAATTAAM

---

**SPU\_026099***forward**reverse compliment**Name**E value**Alignment**Motif*

MA0180.1\_Vsx2 8.9306e-13

NTAATTAA-  
CTAATTAAM

---

**vab-7***forward**reverse compliment**Name**E value**Alignment**Motif*

MA0180.1\_Vsx2 1.7780e-12

MTAATTAA-  
CTAATTAAM

---

**ENSTNIG00000004116***forward**reverse compliment**Name**E value**Alignment**Motif*

MA0180.1\_Vsx2 5.9242e-13

CTAATTAA-  
CTAATTAAM

---

**Smp\_158000***forward**reverse compliment**Name**E value**Alignment**Motif*

MA0180.1\_Vsx2 4.7229e-13

CYAATTAA-  
CTAATTAAM

---

**NEMVEDRAFT\_v1g164989***forward**reverse compliment*

| <i>Name</i>   | <i>E value</i> | <i>Alignment</i>       | <i>Motif</i> |
|---------------|----------------|------------------------|--------------|
| MA0180.1_Vsx2 | 7.4326e-12     | CTAATTAR-<br>CTAATTAAM |              |

---

**ARGFX***forward**reverse compliment*

| <i>Name</i>   | <i>E value</i> | <i>Alignment</i>         | <i>Motif</i> |
|---------------|----------------|--------------------------|--------------|
| MA0180.1_Vsx2 | 1.2971e-10     | NCTAATTARN<br>-CTAATTAAM |              |

---

**repo***forward**reverse compliment*

| <i>Name</i> | <i>E value</i> | <i>Alignment</i> | <i>Motif</i> |
|-------------|----------------|------------------|--------------|
|-------------|----------------|------------------|--------------|

MA0240.1\_repo 2.8598e-10

NYTAATTAA  
--TAATTAA--

---

**ENSCING00000016045***forward**reverse compliment*

| <i>Name</i>   | <i>E value</i> | <i>Alignment</i>          | <i>Motif</i> |
|---------------|----------------|---------------------------|--------------|
| MA0180.1_Vsx2 | 5.3273e-10     | NCYAATTARNN<br>-CTAATTAA- |              |

---

**CNK00090***forward**reverse compliment*

| <i>Name</i>   | <i>E value</i> | <i>Alignment</i>     | <i>Motif</i> |
|---------------|----------------|----------------------|--------------|
| MA0240.1_repo | 2.3502e-11     | ATAATTAA<br>-TAATTAA |              |

---

**CAD25284***forward**reverse compliment*

| <i>Name</i> | <i>E value</i> | <i>Alignment</i> | <i>Motif</i> |
|-------------|----------------|------------------|--------------|
|-------------|----------------|------------------|--------------|

MA0194.1\_Lim1 1.5897e-11

TTAATTAN  
TTAATTA-

---

**O76842\_CUPSA***forward**reverse compliment**Name**E value**Alignment**Motif*

MA0194.1\_Lim1 1.6400e-11

NTAATTAA  
-TAATTAA

---

**LMX1A***forward**reverse compliment**Name**E value**Alignment**Motif*

MA0172.1\_CG11294 1.7100e-11

TTAATTAN  
TTAATTA-

---

**HHEX***forward**reverse compliment**Name**E value**Alignment**Motif*

MA0172.1\_CG11294 2.1773e-10

TAATTNAW  
TAATTAA-

---

**lim-4**

| <i>forward</i> |                | <i>reverse compliment</i> |              |
|----------------|----------------|---------------------------|--------------|
| <i>Name</i>    | <i>E value</i> | <i>Alignment</i>          | <i>Motif</i> |
| MA0181.1_Vsx1  | 9.2564e-11     | NNTAATTAR<br>--TAATTAR    |              |

---

**Sebox**

| <i>forward</i> |                | <i>reverse compliment</i> |              |
|----------------|----------------|---------------------------|--------------|
| <i>Name</i>    | <i>E value</i> | <i>Alignment</i>          | <i>Motif</i> |
| MA0194.1_Lim1  | 2.5830e-10     | NTAATTAANN<br>-TAATTAA--  |              |

---

**Q24780\_9CNID**

| <i>forward</i> |                | <i>reverse compliment</i> |              |
|----------------|----------------|---------------------------|--------------|
| <i>Name</i>    | <i>E value</i> | <i>Alignment</i>          | <i>Motif</i> |

MA0194.1\_Lim1 7.3681e-10

NNTAATTAANN  
--TAATTAA--

---

**mixl1.S***forward**reverse compliment**Name**E value**Alignment**Motif*

MA0194.1\_Lim1 6.0393e-10

NNTAATTAANN  
--TAATTAA--

---

**phx1***forward**reverse compliment**Name**E value**Alignment**Motif*

MA0194.1\_Lim1 1.0717e-09

NNTAATTAANN  
--TAATTAA--

---

**C4B866\_NEMVE***forward**reverse compliment**Name**E value**Alignment**Motif*



MA0194.1\_Lim1 1.2649e-09

NNNTAATTAANN  
---TAATTAA--

---

**CNG03450***forward**reverse compliment**Name**E value**Alignment**Motif*

MA0444.1\_CG34031 7.7102e-07

NNWATTAAAN  
-CAATTAA-

---

**hbn***forward**reverse compliment**Name**E value**Alignment**Motif*

MA0229.1\_inv 1.1169e-09

NTAATTTAATTAN  
----WYTAATTA-

---

**CG5369***forward**reverse compliment**Name**E value**Alignment**Motif*

MA0194.1\_Lim1 1.2872e-09

TAATTNNATTA  
TAATTAA----

---

**unc-4***forward**reverse compliment**Name**E value**Alignment**Motif*

MA0178.1\_CG32105 1.8305e-08

TAATTNAATTA  
TAATTAA----

---

**bsh***forward**reverse compliment**Name**E value**Alignment**Motif*

MA0229.1\_inv 3.9607e-11

TAATTARATTA  
TAATTARW---

---

**Uncx***forward**reverse compliment**Name**E value**Alignment**Motif*

MA0172.1\_CG11294 3.7957e-09

NTAATTNRATTAN  
-TAATTAA-----

---

**Alx4**

|               | <i>forward</i> | <i>reverse compliment</i>      |              |
|---------------|----------------|--------------------------------|--------------|
| <i>Name</i>   | <i>E value</i> | <i>Alignment</i>               | <i>Motif</i> |
| MA0194.1_Lim1 | 6.3149e-08     | NTAATYNAATTAN<br>-TAATTAA----- |              |

---

**CG2808**

|             | <i>forward</i> | <i>reverse compliment</i>  |              |
|-------------|----------------|----------------------------|--------------|
| <i>Name</i> | <i>E value</i> | <i>Alignment</i>           | <i>Motif</i> |
| MA0188.1_Dr | 1.4849e-08     | TAATTNSATTA<br>TAATTGG---- |              |

---

**CG11294**

|             | <i>forward</i> | <i>reverse compliment</i> |              |
|-------------|----------------|---------------------------|--------------|
| <i>Name</i> | <i>E value</i> | <i>Alignment</i>          | <i>Motif</i> |

MA0229.1\_inv 6.6941e-10

TAATNNAATTA  
---WYTAATTA

---

**LHX4***forward**reverse compliment**Name**E value**Alignment**Motif*

MA0232.1\_lbl

1.2360e-07

NTAATTAN  
-TMATTA-

---

**HGTX***forward**reverse compliment**Name**E value**Alignment**Motif*

MA0232.1\_lbl

6.2738e-09

NTMATTAN  
-TMATTA-

---

**HOXB2***forward**reverse compliment**Name**E value**Alignment**Motif*

MA0232.1\_lbl 1.5599e-08

NYAATTAN  
-TMATTA-

---

**NOTO***forward**reverse compliment**Name**E value**Alignment**Motif*

MA0232.1\_lbl

1.6063e-08

NYAATTAN  
-TMATTA-

---

**NKX6-2***forward**reverse compliment**Name**E value**Alignment**Motif*

MA0232.1\_lbl

1.8473e-08

NTAATTRN  
-TAATKA-

---

**HOXA2***forward**reverse compliment**Name**E value**Alignment**Motif*

MA0232.1\_lbl 8.6640e-09

NTAATTAN  
-TMATTA-

---

**PDX1***forward**reverse compliment**Name**E value**Alignment**Motif*

MA0232.1\_lbl

1.1612e-08

YTAATKAN  
-TAATKA-

---

**Ubx***forward**reverse compliment**Name**E value**Alignment**Motif*

MA0232.1\_lbl

1.5127e-08

NYAATTAN  
-TMATTA-

---

**Lhx2***forward**reverse compliment**Name**E value**Alignment**Motif*

MA0232.1\_lbl

9.1589e-09

NYMATTAN  
-TMATTA-

---

**Lhx9**

| <i>forward</i> |                | <i>reverse compliment</i> |              |
|----------------|----------------|---------------------------|--------------|
| <i>Name</i>    | <i>E value</i> | <i>Alignment</i>          | <i>Motif</i> |
| MA0232.1_lbl   | 1.1389e-08     | NYNATTAN<br>-TMATTA-      |              |

---

**EMX1**

| <i>forward</i> |                | <i>reverse compliment</i> |              |
|----------------|----------------|---------------------------|--------------|
| <i>Name</i>    | <i>E value</i> | <i>Alignment</i>          | <i>Motif</i> |
| MA0232.1_lbl   | 1.3018e-08     | NTAATTAN<br>-TMATTA-      |              |

---

**lab**

| <i>forward</i> |                | <i>reverse compliment</i> |              |
|----------------|----------------|---------------------------|--------------|
| <i>Name</i>    | <i>E value</i> | <i>Alignment</i>          | <i>Motif</i> |

MA0232.1\_lbl 1.0849e-08

STAATTAN  
-TMATTA-

---

**CG18599***forward**reverse compliment**Name**E value**Alignment**Motif*

MA0232.1\_lbl

1.9400e-09

TAATTAN  
TMATTA-

---

**Meox2***forward**reverse compliment**Name**E value**Alignment**Motif*

MA0232.1\_lbl

7.1346e-09

NTAATTAN  
-TMATTA-

---

**ems***forward**reverse compliment**Name**E value**Alignment**Motif*



MA0232.1\_lbl 9.6821e-09

NTAATTAN  
-TMATTA-

---

**EVX1***forward**reverse compliment**Name**E value**Alignment**Motif*

MA0232.1\_lbl

1.2369e-08

NTAATTAN  
-TMATTA-

---

**EVX2***forward**reverse compliment**Name**E value**Alignment**Motif*

MA0232.1\_lbl

1.2336e-08

NTAATTAN  
-TAATKA-

---

**Lim3***forward**reverse compliment**Name**E value**Alignment**Motif*

MA0232.1\_lbl

2.1239e-08

NTAATTAN  
-TAATKA-

---

**Lhx4**

| <i>forward</i> |                | <i>reverse compliment</i> |              |
|----------------|----------------|---------------------------|--------------|
| <i>Name</i>    | <i>E value</i> | <i>Alignment</i>          | <i>Motif</i> |
| MA0232.1_lbl   | 2.0476e-08     | NTAATTAN<br>-TMATTA-      |              |

---

**HOXD1**

| <i>forward</i> |                | <i>reverse compliment</i> |              |
|----------------|----------------|---------------------------|--------------|
| <i>Name</i>    | <i>E value</i> | <i>Alignment</i>          | <i>Motif</i> |
| MA0232.1_lbl   | 2.0307e-08     | NTAATTAN<br>-TAATKA-      |              |

---

**Q9GP48\_9TURB**

| <i>forward</i> |                | <i>reverse compliment</i> |              |
|----------------|----------------|---------------------------|--------------|
| <i>Name</i>    | <i>E value</i> | <i>Alignment</i>          | <i>Motif</i> |
| MA0232.1_lbl   | 3.8246e-08     | NTAATTAN<br>-TMATTA-      |              |

---

**Q70LF3\_ARTSF**

|              |                | <i>forward</i>       | <i>reverse compliment</i> |
|--------------|----------------|----------------------|---------------------------|
| <i>Name</i>  | <i>E value</i> | <i>Alignment</i>     | <i>Motif</i>              |
| MA0232.1_lbl | 2.7533e-08     | NTAATTAN<br>-TMATTA- |                           |

---

**NEMVEDRAFT\_v1g205636**

|              |                | <i>forward</i>       | <i>reverse compliment</i> |
|--------------|----------------|----------------------|---------------------------|
| <i>Name</i>  | <i>E value</i> | <i>Alignment</i>     | <i>Motif</i>              |
| MA0232.1_lbl | 3.7288e-08     | NTAATTAN<br>-TMATTA- |                           |

---

**MNX1**

|             |                | <i>forward</i>   | <i>reverse compliment</i> |
|-------------|----------------|------------------|---------------------------|
| <i>Name</i> | <i>E value</i> | <i>Alignment</i> | <i>Motif</i>              |

MA0232.1\_lbl 2.6559e-08

NTAATTAN  
-TMATTA-

---

**DRGX***forward**reverse compliment**Name**E value**Alignment**Motif*

MA0232.1\_lbl

3.1653e-08

NYAATTAN  
-TMATTA-

---

**EN2***forward**reverse compliment**Name**E value**Alignment**Motif*

MA0232.1\_lbl

3.0403e-08

NTAATTAN  
-TMATTA-

---

**Prrx2***forward**reverse compliment**Name**E value**Alignment**Motif*

MA0232.1\_lbl 2.7448e-08

NTAATTRN  
-TAATKA-

---

**EN1***forward**reverse compliment**Name**E value**Alignment**Motif*

MA0232.1\_lbl

2.6907e-08

TAATTANN  
TAATKA--

---

**ALX3***forward**reverse compliment**Name**E value**Alignment**Motif*

MA0232.1\_lbl

2.1881e-08

NTAATTRN  
-TAATKA-

---

**SHOX***forward**reverse compliment**Name**E value**Alignment**Motif*

MA0232.1\_lbl 2.2701e-08

NYAATTAN  
-TMATTA-

---

**Awh***forward**reverse compliment**Name**E value**Alignment**Motif*

MA0232.1\_lbl

1.6501e-08

NTAATTAN  
-TMATTA-

---

**zfhx4***forward**reverse compliment**Name**E value**Alignment**Motif*

MA0232.1\_lbl

5.4071e-08

NYAATTANN  
-TMATTA--

---

**Lhx5***forward**reverse compliment**Name**E value**Alignment**Motif*

MA0232.1\_lbl 7.9458e-08

NNNYAATTA  
---TMATTA

---

**uncx***forward**reverse compliment**Name**E value**Alignment**Motif*

MA0232.1\_lbl

9.0879e-08

NNTAATTRN  
--TAATKA-

---

**Lhx3***forward**reverse compliment**Name**E value**Alignment**Motif*

MA0232.1\_lbl

6.3907e-08

NNATTANNN  
TAATKA---

---

**Hoxa1***forward**reverse compliment**Name**E value**Alignment**Motif*

MA0232.1\_lbl 3.8787e-08

NNYNATTNN  
--TMATTA--

---

**LHX6***forward**reverse compliment**Name**E value**Alignment**Motif*

MA0232.1\_lbl

1.0164e-07

TAATTANN  
TMATTA--

---

**Lhx6***forward**reverse compliment**Name**E value**Alignment**Motif*

MA0232.1\_lbl

1.2291e-06

NYAATYAN  
-TMATTA-

---

**prd-b***forward**reverse compliment**Name**E value**Alignment**Motif*



MA0232.1\_lbl 7.3149e-07

NTRATTRNN  
-TAATKA--

---

**Q4RRY4\_TETNG***forward**reverse compliment**Name**E value**Alignment**Motif*

MA0232.1\_lbl 2.1430e-07

NNYAATYAN  
--TMATTA-

---

**7\_TTA\_RVLRA***forward**reverse compliment**Name**E value**Alignment**Motif*

MA0232.1\_lbl 5.5511e-08

TAATTARNN  
TMATTA---

---

**HOXA1***forward**reverse compliment**Name**E value**Alignment**Motif*

MA0232.1\_lbl 1.4927e-07

NNTAATTANN  
--TAATKA--

---

**ceh-23***forward**reverse compliment**Name**E value**Alignment**Motif*

MA0232.1\_lbl 1.3081e-07

NTAATTANNN  
-TAATKA---

---

**56\_ATT\_HRVQA***forward**reverse compliment**Name**E value**Alignment**Motif*

MA0232.1\_lbl 1.9416e-07

NYAATTARNN  
-TMATTA---

---

**MIXL1***forward**reverse compliment**Name**E value**Alignment**Motif*

MA0232.1\_lbl 2.4876e-07

NNYAATTANN  
--TMATTA--

---

**slou***forward**reverse compliment**Name**E value**Alignment**Motif*

MA0232.1\_lbl

1.4101e-07

NNYAATTANN  
--TMATTA--

---

**En2***forward**reverse compliment**Name**E value**Alignment**Motif*

MA0232.1\_lbl

6.0426e-08

NSTAATTANN  
--TMATTA--

---

**Hoxd3***forward**reverse compliment**Name**E value**Alignment**Motif*

MA0232.1\_lbl 1.0207e-07

NNYAATTANN  
--TMATTA--

---

**GSX1***forward**reverse compliment**Name**E value**Alignment**Motif*

MA0232.1\_lbl

6.6879e-08

NTMATNAN  
-TAATKA-

---

**HOXB5***forward**reverse compliment**Name**E value**Alignment**Motif*

MA0232.1\_lbl

5.6550e-08

NYMATTAN  
-TMATTA-

---

**Scr***forward**reverse compliment**Name**E value**Alignment**Motif*

MA0232.1\_lbl 4.3130e-08

NYMATTAN  
-TMATTA-

---

**HOXB8***forward**reverse compliment**Name**E value**Alignment**Motif*

MA0232.1\_lbl

1.3096e-07

NTAATKRC  
-TAATKA-

---

**HOXD8***forward**reverse compliment**Name**E value**Alignment**Motif*

MA0232.1\_lbl

2.2035e-07

NTAATKRC  
-TAATKA-

---

**HOXB6***forward**reverse compliment**Name**E value**Alignment**Motif*

MA0232.1\_lbl 3.1744e-08

GYMATTAN  
-TMATTA-

---

**HOXA6***forward**reverse compliment**Name**E value**Alignment**Motif*

MA0223.1\_exex 8.5000e-08

NNTAATKRCN  
--TAATTAN-

---

**HOXB1***forward**reverse compliment**Name**E value**Alignment**Motif*

MA0223.1\_exex 2.3787e-10

NTAATTAC  
-TAATTAN

---

**HOXA5***forward**reverse compliment**Name**E value**Alignment**Motif*

MA0223.1\_exex 3.9288e-10

STAATTAS  
-TAATTAN**Q0N4M8\_NEMVE***forward**reverse compliment**Name**E value**Alignment**Motif*

MA0223.1\_exex 2.3856e-09

GTAATTAN  
NTAATTA-**GSX2***forward**reverse compliment**Name**E value**Alignment**Motif*

MA0232.1\_lbl 8.5976e-09

NTAATKRS  
-TAATKA-**abd-A***forward**reverse compliment**Name**E value**Alignment**Motif*

MA0223.1\_exex 1.9332e-08

NGTAATTANN  
-NTAATTA--

---

**pb**

| <i>forward</i> |                | <i>reverse compliment</i> |              |
|----------------|----------------|---------------------------|--------------|
| <i>Name</i>    | <i>E value</i> | <i>Alignment</i>          | <i>Motif</i> |
| MA0232.1_lbl   | 6.8619e-08     | GTMATTAN<br>-TMATTA-      |              |

---

**HOXB3**

| <i>forward</i> |                | <i>reverse compliment</i> |              |
|----------------|----------------|---------------------------|--------------|
| <i>Name</i>    | <i>E value</i> | <i>Alignment</i>          | <i>Motif</i> |
| MA0232.1_lbl   | 5.6179e-08     | NNYMATTANN<br>--TMATTA--  |              |

---

**NEMVEDRAFT\_v1g8907**

| <i>forward</i> |                | <i>reverse compliment</i> |              |
|----------------|----------------|---------------------------|--------------|
| <i>Name</i>    | <i>E value</i> | <i>Alignment</i>          | <i>Motif</i> |



MA0232.1\_lbl 1.4668e-07

NTAATKRNNN  
-TAATKA---

---

**Hoxa2***forward**reverse compliment**Name**E value**Alignment**Motif*

MA0232.1\_lbl

3.9527e-08

NNTAATTANN  
--TMATTA--

---

**MEOX2***forward**reverse compliment**Name**E value**Alignment**Motif*

MA0232.1\_lbl

7.0922e-08

NNTAATTANN  
--TMATTA--

---

**eve***forward**reverse compliment**Name**E value**Alignment**Motif*

MA0241.1\_ro 7.8255e-10

NSTAATTAGN  
--TAATTAR-

---

**EMX2***forward**reverse compliment**Name**E value**Alignment**Motif*

MA0241.1\_ro

2.5200e-11

NTAATTAG  
-TAATTAR

---

**ro***forward**reverse compliment**Name**E value**Alignment**Motif*

MA0241.1\_ro

1.2763e-11

TAATTARN  
TAATTAR-

---

**ap***forward**reverse compliment**Name**E value**Alignment**Motif*

MA0209.1\_ap 1.2763e-11

TAATTARN  
TAATTAR-

---

**RAX***forward**reverse compliment**Name**E value**Alignment**Motif*

MA0202.1\_Rx

5.1507e-11

NTAATTAR  
-TAATTAR

---

**inv***forward**reverse compliment**Name**E value**Alignment**Motif*

MA0229.1\_inv

6.5503e-15

TAATTARW  
TAATTARW

---

**ind***forward**reverse compliment**Name**E value**Alignment**Motif*

MA0228.1\_ind 7.6496e-11

TAATTARNR  
TAATTAR--

---

**ISX**

|             | <i>forward</i> | <i>reverse compliment</i> |              |
|-------------|----------------|---------------------------|--------------|
| <i>Name</i> | <i>E value</i> | <i>Alignment</i>          | <i>Motif</i> |
| MA0241.1_ro | 8.0527e-11     | CTAATTAN<br>YTAATTA-      |              |

---

**LBX1**

|             | <i>forward</i> | <i>reverse compliment</i> |              |
|-------------|----------------|---------------------------|--------------|
| <i>Name</i> | <i>E value</i> | <i>Alignment</i>          | <i>Motif</i> |
| MA0241.1_ro | 4.2517e-10     | NTAATTAG<br>-TAATTAR      |              |

---

**pdm3**

|             | <i>forward</i> | <i>reverse compliment</i> |              |
|-------------|----------------|---------------------------|--------------|
| <i>Name</i> | <i>E value</i> | <i>Alignment</i>          | <i>Motif</i> |

MA0241.1\_ro 1.8173e-10

CTAATTAN  
YTAATTA-

---

**lbl***forward**reverse compliment**Name**E value**Alignment**Motif*

MA0241.1\_ro

1.9839e-09

NTAATKAG  
-TAATTAR

---

**dve***forward**reverse compliment**Name**E value**Alignment**Motif*

MA0241.1\_ro

9.7944e-10

NCTAATTANN  
-YTAATTA--

---

**Q9BJW6\_9CNID***forward**reverse compliment**Name**E value**Alignment**Motif*

MA0241.1\_ro 8.0265e-10

NNTAATTAGN  
--TAATTAR-

---

**MEOX1***forward**reverse compliment**Name**E value**Alignment**Motif*

MA0223.1\_exex 5.9674e-09

NNTAATTASN  
--TAATTAN-

---

**exex***forward**reverse compliment**Name**E value**Alignment**Motif*

MA0198.1\_OdsH 1.1913e-08

NNNNYAATTNNCNN  
----YAATTAR---

---

**60\_ATA\_KTVQV***forward**reverse compliment**Name**E value**Alignment**Motif*

MA0221.1\_eve 4.0308e-10

NTMATTARNN  
-TMATTAR--

---

**LHX9**

| <i>forward</i> |                | <i>reverse compliment</i> |              |
|----------------|----------------|---------------------------|--------------|
| <i>Name</i>    | <i>E value</i> | <i>Alignment</i>          | <i>Motif</i> |
| MA0232.1_lbl   | 2.4650e-07     | NNTNATTAN<br>--TMATTA--   |              |

---

**POU6F1**

| <i>forward</i> |                | <i>reverse compliment</i> |              |
|----------------|----------------|---------------------------|--------------|
| <i>Name</i>    | <i>E value</i> | <i>Alignment</i>          | <i>Motif</i> |
| MA0232.1_lbl   | 1.9095e-07     | NNTAATTANN<br>--TAATKA--  |              |

---

**Q86SD7\_PODCA**

| <i>forward</i> |                | <i>reverse compliment</i> |              |
|----------------|----------------|---------------------------|--------------|
| <i>Name</i>    | <i>E value</i> | <i>Alignment</i>          | <i>Motif</i> |

MA0232.1\_lbl 2.5359e-07

NNTAATTANN  
--TMATTA--

---

**CBG07641***forward**reverse compliment**Name**E value**Alignment**Motif*

MA0232.1\_lbl 1.8462e-07

NNTAATTANN  
--TMATTA--

---

**ceh-62***forward**reverse compliment**Name**E value**Alignment**Motif*

MA0232.1\_lbl 2.4811e-07

NNTAATTANN  
--TMATTA--

---

**btn***forward**reverse compliment**Name**E value**Alignment**Motif*



MA0232.1\_lbl 7.5444e-08

NNTMATTANN  
--TMATTA--

---

**258\_ATT\_RTVQQ***forward**reverse compliment**Name**E value**Alignment**Motif*

MA0232.1\_lbl

8.0329e-08

NTMATTANNN  
-TMATTA---

---

**LMX1B***forward**reverse compliment**Name**E value**Alignment**Motif*

MA0232.1\_lbl

2.8185e-07

NNNNTAATTAN  
----TMATTA-

---

**SNAPOd2T00006145001***forward**reverse compliment**Name**E value**Alignment**Motif*

MA0232.1\_lbl 2.6419e-06

NNYAATYANN  
--TMATTA--

---

**227\_TTT\_YRIAA***forward**reverse compliment*

| <i>Name</i>    | <i>E value</i> | <i>Alignment</i>         | <i>Motif</i> |
|----------------|----------------|--------------------------|--------------|
| MA0075.1_Prrx2 | 6.0657e-06     | NAATTANNNN<br>-AATTA---- |              |

---

**CAD26261***forward**reverse compliment*

| <i>Name</i>      | <i>E value</i> | <i>Alignment</i>       | <i>Motif</i> |
|------------------|----------------|------------------------|--------------|
| MA0178.1_CG32105 | 2.6988e-08     | TWWATTANN<br>TTAATTA-- |              |

---

**Y749\_MIMIV***forward**reverse compliment*

| <i>Name</i> | <i>E value</i> | <i>Alignment</i> | <i>Motif</i> |
|-------------|----------------|------------------|--------------|
|-------------|----------------|------------------|--------------|

MA0346.1\_NHP6B 3.8384e-06

-----TATATTAA-----  
NNNYNNWWTATAWWNNNANN

---

**NCU09556***forward**reverse compliment*

| <i>Name</i>   | <i>E value</i> | <i>Alignment</i>     | <i>Motif</i> |
|---------------|----------------|----------------------|--------------|
| MA0379.1_SIG1 | 2.9552e-06     | TTAATATA<br>---ATATA |              |

---

**ATHB-22***forward**reverse compliment*

| <i>Name</i>   | <i>E value</i> | <i>Alignment</i>               | <i>Motif</i> |
|---------------|----------------|--------------------------------|--------------|
| MA0356.1_PHO2 | 3.7090e-05     | NNNWAWATTATNN<br>-----TAWTAW-- |              |

---

**SNAPOd2T00003340001***forward**reverse compliment*

| <i>Name</i> | <i>E value</i> | <i>Alignment</i> | <i>Motif</i> |
|-------------|----------------|------------------|--------------|
|-------------|----------------|------------------|--------------|

MA0232.1\_lbl 6.4014e-06

NWWATTANNN  
-TAATKA---

---

**CG4328***forward**reverse compliment*

| <i>Name</i>     | <i>E value</i> | <i>Alignment</i>     | <i>Motif</i> |
|-----------------|----------------|----------------------|--------------|
| MA0182.1_CG4328 | 1.4526e-07     | YAATWAWN<br>YAATWAW- |              |

---

**hbx10***forward**reverse compliment*

| <i>Name</i>     | <i>E value</i> | <i>Alignment</i>     | <i>Motif</i> |
|-----------------|----------------|----------------------|--------------|
| MA0182.1_CG4328 | 1.1851e-05     | NWWATTRN<br>WTWATTR- |              |

---

**Q8I9J5\_9BILA***forward**reverse compliment*

| <i>Name</i> | <i>E value</i> | <i>Alignment</i> | <i>Motif</i> |
|-------------|----------------|------------------|--------------|
|-------------|----------------|------------------|--------------|

MA0448.1\_H2.0 3.6600e-05

NRTWATTANN  
-NTWATNA--

---

**Q7M3U4\_ACRFO***forward**reverse compliment*

| <i>Name</i> | <i>E value</i> | <i>Alignment</i> | <i>Motif</i> |
|-------------|----------------|------------------|--------------|
|-------------|----------------|------------------|--------------|

MA0075.1\_Prrx2 1.9488e-05

NNNTAATTNNN  
---TAATT---

---

**CBG04010***forward**reverse compliment*

| <i>Name</i> | <i>E value</i> | <i>Alignment</i> | <i>Motif</i> |
|-------------|----------------|------------------|--------------|
|-------------|----------------|------------------|--------------|

MA0206.1\_abd-A 7.7487e-06

NNTTAATKNNN  
--TTAATTA--

---

**10\_TGG\_KSVMQ***forward**reverse compliment*

| <i>Name</i> | <i>E value</i> | <i>Alignment</i> | <i>Motif</i> |
|-------------|----------------|------------------|--------------|
|-------------|----------------|------------------|--------------|

MA0203.1\_Scr 4.2788e-06

NNYTAATGNN  
--YTAATGA-

---

**237\_TAG\_YAVNA***forward**reverse compliment**Name**E value**Alignment**Motif*

MA0238.1\_pb

2.3898e-06

NMATTARNNN  
TMATTAR---

---

**2\_TTT\_RTVSA***forward**reverse compliment**Name**E value**Alignment**Motif*

MA0203.1\_Scr

1.5232e-05

NNYTAATNNN  
--YTAATGA-

---

**4\_TTC\_VRVSA***forward**reverse compliment**Name**E value**Alignment**Motif*

MA0203.1\_Scr 1.0721e-04

NNNATTARNN  
-TCATTAR--

---

**17\_TAT\_TRVSA***forward**reverse compliment**Name**E value**Alignment**Motif*

MA0203.1\_Scr 3.5384e-05

NNYATTARNN  
-TCATTAR--

---

**HDG11***forward**reverse compliment**Name**E value**Alignment**Motif*

MA0151.1\_ARID3A 3.6185e-06

NCATTWAWKN  
--ATTAAA--

---

**HDG7***forward**reverse compliment**Name**E value**Alignment**Motif*

MA0170.1\_C15 6.0448e-09

NCATTAAWTRN  
---TTAAWKR-

---

**HDG1***forward**reverse compliment**Name**E value**Alignment**Motif*

MA0226.1\_hbn

3.0337e-09

NYAATTAATGN  
-YAATTAA---

---

**ANL2***forward**reverse compliment**Name**E value**Alignment**Motif*

MA0206.1\_abd-A

4.3694e-06

NNAATTAATGN  
-TAATTAA---

---

**egl-5***forward**reverse compliment**Name**E value**Alignment**Motif*



MA0248.1\_tup 3.1483e-08

CCCATTAAAT  
-CMATTAW--

---

**14\_TCG\_KGTQM***forward**reverse compliment**Name**E value**Alignment**Motif*

MA0248.1\_tup

4.2624e-08

NNYTAATGGG  
--WTAATKG-

---

**NKX6-3***forward**reverse compliment**Name**E value**Alignment**Motif*

MA0215.1\_btn

3.0070e-09

NTCATTAWN  
-TCATTAN-

---

**tup***forward**reverse compliment**Name**E value**Alignment**Motif*

MA0248.1\_tup 2.1446e-11

SWTAATKG  
-WTAATKG

---

**C15***forward**reverse compliment**Name**E value**Alignment**Motif*

MA0170.1\_C15 1.2763e-11

NTTAAWKR  
-TTAAWKR

---

**232\_TCG\_IKNQM***forward**reverse compliment**Name**E value**Alignment**Motif*

MA0248.1\_tup 3.8435e-09

NYCATTARNN  
-CMATTAW--

---

**ATML1***forward**reverse compliment**Name**E value**Alignment**Motif*

MA0186.1\_Dfd 8.4622e-05

NNNANTNANN  
-TCATTAA--

---

**226\_TTT\_KMISA**

| <i>forward</i> |                | <i>reverse compliment</i> |              |
|----------------|----------------|---------------------------|--------------|
| <i>Name</i>    | <i>E value</i> | <i>Alignment</i>          | <i>Motif</i> |
| MA0075.1_Prrx2 | 2.0502e-04     | NNNATTANNN<br>--AATTA---  |              |

---

**Isl1**

| <i>forward</i> |                | <i>reverse compliment</i> |              |
|----------------|----------------|---------------------------|--------------|
| <i>Name</i>    | <i>E value</i> | <i>Alignment</i>          | <i>Motif</i> |
| MA0132.1_Pdx1  | 2.3124e-06     | NCCATTAGN<br>--AATTAG-    |              |

---

**236\_TAG\_KSTQM**

| <i>forward</i> |                | <i>reverse compliment</i> |              |
|----------------|----------------|---------------------------|--------------|
| <i>Name</i>    | <i>E value</i> | <i>Alignment</i>          | <i>Motif</i> |
|                |                |                           |              |

MA0248.1\_tup 4.8824e-06

NCCATTANNN  
-CMATTAW--

---

**NANOG***forward**reverse compliment**Name**E value**Alignment**Motif*

MA0214.1\_bsh 1.0306e-04

NCNRTYAN  
-YMATTA

---

**Dfd***forward**reverse compliment**Name**E value**Alignment**Motif*

MA0232.1\_lbl 1.7692e-06

NNYCATTANN  
--TMATTA--

---

**HB-5***forward**reverse compliment**Name**E value**Alignment**Motif*

MA0110.1\_ATHB-5 2.0816e-07

NNANCAATAATTGNNNNNNWN  
-----AATMATTGN-----

---

**ATHB-21***forward**reverse compliment**Name**E value**Alignment**Motif*

MA0110.1\_ATHB-5 6.3559e-07

NNAATWATTGNTNN  
NCAATKATT-----

---

**ATHB-53***forward**reverse compliment**Name**E value**Alignment**Motif*

MA0110.1\_ATHB-5 4.4373e-10

NCAATTATTGN  
NCAATKATT--

---

**HAT5***forward**reverse compliment**Name**E value**Alignment**Motif*

MA0008.1\_HAT5 2.8499e-08

NNAATAATTNW  
--AATAATTN-

---

**ATHB-13***forward**reverse compliment**Name**E value**Alignment**Motif*

MA0008.1\_HAT5 4.2208e-08

NNAATTATTRN  
-NAATTATT--

---

**ATHB-16***forward**reverse compliment**Name**E value**Alignment**Motif*

MA0008.1\_HAT5 1.8398e-09

TAATMATT-  
-AATAATTN

---

**ATHB-20***forward**reverse compliment**Name**E value**Alignment**Motif*

MA0008.1\_HAT5 2.7583e-08

NYAATAATTNN  
--AATAATTN-

---

**ATHB-5**

| <i>forward</i> |                | <i>reverse compliment</i>  |              |
|----------------|----------------|----------------------------|--------------|
| <i>Name</i>    | <i>E value</i> | <i>Alignment</i>           | <i>Motif</i> |
| MA0008.1_HAT5  | 1.9168e-07     | NCAATAATTNN<br>--AATAATTN- |              |

---

**NCU03070**

| <i>forward</i> |                | <i>reverse compliment</i> |              |
|----------------|----------------|---------------------------|--------------|
| <i>Name</i>    | <i>E value</i> | <i>Alignment</i>          | <i>Motif</i> |
| MA0216.1_cad   | 6.3417e-05     | NNYCAATAWW<br>---YAATAAA  |              |

---

**ATHB-51**

| <i>forward</i> |                | <i>reverse compliment</i> |              |
|----------------|----------------|---------------------------|--------------|
| <i>Name</i>    | <i>E value</i> | <i>Alignment</i>          | <i>Motif</i> |

MA0008.1\_HAT5 1.7745e-05

NNAATWAT--  
--AATAATTN

---

**PK20392.1***forward**reverse compliment**Name**E value**Alignment**Motif*

MA0008.1\_HAT5 9.0427e-05

NNAATMATNN  
--AATAATTN

---

**ATHB-6***forward**reverse compliment**Name**E value**Alignment**Motif*

MA0110.1\_ATHB-5 6.6140e-05

NNAATNATN--  
--AATMATTGN

---

**GSC2***forward**reverse compliment**Name**E value**Alignment**Motif*



MA0094.1\_Ubx 2.0696e-03

NTAATNNN  
-TAAT---

---

**Isl2***forward**reverse compliment**Name**E value**Alignment**Motif*

MA0094.1\_Ubx 3.3589e-03

NNNTNNN  
--ATTA-

---

**Obox3***forward**reverse compliment**Name**E value**Alignment**Motif*

MA0094.1\_Ubx 1.7438e-03

NNATNWN  
--ATTA-

---

**POU5F1B***forward**reverse compliment**Name**E value**Alignment**Motif*

MA0075.1\_Prrx2 3.0457e-03

NNAANNN  
-TAATT-

---

**En1***forward**reverse compliment**Name**E value**Alignment**Motif*

MA0075.1\_Prrx2 2.1945e-03

NNNANNN  
-TAATT-

---

**Dlx4***forward**reverse compliment**Name**E value**Alignment**Motif*

MA0075.1\_Prrx2 2.1990e-03

NTAATNNN  
-TAATT--

---

**Pdx1***forward**reverse compliment**Name**E value**Alignment**Motif*

MA0094.1\_Ubx 2.5080e-03

NNNATTAN  
---ATTA-**E5***forward**reverse compliment**Name**E value**Alignment**Motif*

MA0075.1\_Prrx2 1.9975e-03

NTAATNNN  
-TAATT--**Isx***forward**reverse compliment**Name**E value**Alignment**Motif*

MA0094.1\_Ubx 2.0861e-03

NNATTNNN  
--ATTA--**Hoxd1***forward**reverse compliment**Name**E value**Alignment**Motif*

MA0075.1\_Prrx2 2.9738e-03

NNNNATYN  
---AATTA

---

**Q6WL90\_TRICY**

| <i>forward</i> |                | <i>reverse compliment</i> |              |
|----------------|----------------|---------------------------|--------------|
| <i>Name</i>    | <i>E value</i> | <i>Alignment</i>          | <i>Motif</i> |
| MA0075.1_Prrx2 | 1.9260e-03     | NTAATNNN<br>-TAATT--      |              |

---

**Otp**

| <i>forward</i> |                | <i>reverse compliment</i> |              |
|----------------|----------------|---------------------------|--------------|
| <i>Name</i>    | <i>E value</i> | <i>Alignment</i>          | <i>Motif</i> |
| MA0075.1_Prrx2 | 2.0878e-03     | NNTAATNN<br>--TAATT-      |              |

---

**Rhox6**

| <i>forward</i> |                | <i>reverse compliment</i> |              |
|----------------|----------------|---------------------------|--------------|
| <i>Name</i>    | <i>E value</i> | <i>Alignment</i>          | <i>Motif</i> |

MA0094.1\_Ubx 2.0443e-03

NTAATNNN  
-TAAT---

---

**Evx2***forward**reverse compliment**Name**E value**Alignment**Motif*

MA0075.1\_Prrx2 2.3487e-03

NNATTANN  
-AATTA--

---

**Hoxb6***forward**reverse compliment**Name**E value**Alignment**Motif*

MA0094.1\_Ubx 2.5913e-03

NNNNNNNN  
TAAT---

---

**Dbx2***forward**reverse compliment**Name**E value**Alignment**Motif*

MA0094.1\_Ubx 4.4778e-03

NNNTNNN  
TAAT---

---

**Hoxd8**

| <i>forward</i> |                | <i>reverse compliment</i> |              |
|----------------|----------------|---------------------------|--------------|
| <i>Name</i>    | <i>E value</i> | <i>Alignment</i>          | <i>Motif</i> |
| MA0094.1_Ubx   | 4.7931e-03     | NNNNNNNN<br>---ATTA-      |              |

---

**Obox5**

| <i>forward</i> |                | <i>reverse compliment</i> |              |
|----------------|----------------|---------------------------|--------------|
| <i>Name</i>    | <i>E value</i> | <i>Alignment</i>          | <i>Motif</i> |
| MA0094.1_Ubx   | 2.4391e-03     | NNNATNAN<br>---ATTA-      |              |

---

**Barx2**

| <i>forward</i> |                | <i>reverse compliment</i> |              |
|----------------|----------------|---------------------------|--------------|
| <i>Name</i>    | <i>E value</i> | <i>Alignment</i>          | <i>Motif</i> |

MA0094.1\_Ubx 3.1310e-03

NNNNATTAN  
----ATTA-**Hoxa5***forward**reverse compliment**Name**E value**Alignment**Motif*

MA0094.1\_Ubx 3.3308e-03

NTAATNNNN  
-TAAT----**barx1***forward**reverse compliment**Name**E value**Alignment**Motif*

MA0075.1\_Prrx2 3.1848e-03

NNNNATTAN  
---AATTA-**Nkx6-1***forward**reverse compliment**Name**E value**Alignment**Motif*

MA0075.1\_Prrx2 3.4714e-03

NNTAATNRN  
--TAATT--

---

**Hoxb3***forward**reverse compliment**Name**E value**Alignment**Motif*

MA0075.1\_Prrx2 3.1781e-03

NTAATNNNN  
-TAATT---

---

**Dlx3***forward**reverse compliment**Name**E value**Alignment**Motif*

MA0075.1\_Prrx2 3.2354e-03

NTAATNNNN  
-TAATT---

---

**Gsx2***forward**reverse compliment**Name**E value**Alignment**Motif*



MA0075.1\_Prrx2 3.0869e-03

NTAATNNNN  
-TAATT---

---

**Evx1***forward**reverse compliment**Name**E value**Alignment**Motif*

MA0075.1\_Prrx2 3.1475e-03

NTAATNNNN  
-TAATT---

---

**Hoxb5***forward**reverse compliment**Name**E value**Alignment**Motif*

MA0094.1\_Ubx 3.7479e-03

NTNATNNNN  
-TAAT----

---

**Nkx6-3***forward**reverse compliment**Name**E value**Alignment**Motif*

MA0075.1\_Prrx2 3.8618e-03

NNNATNANN  
--AATTA--

---

**Emx2***forward**reverse compliment**Name**E value**Alignment**Motif*

MA0075.1\_Prrx2 3.2531e-03

NTAATNNNN  
-TAATT---

---

**Nkx1-2***forward**reverse compliment**Name**E value**Alignment**Motif*

MA0075.1\_Prrx2 3.3875e-03

NNTAATNNN  
--TAATT--

---

**Bsx***forward**reverse compliment**Name**E value**Alignment**Motif*

MA0075.1\_Prrx2 3.4670e-03

NTAATNNNN  
-TAATT---

---

**Lbx2***forward**reverse compliment**Name**E value**Alignment**Motif*

MA0094.1\_Ubx 5.3979e-03

NNAANNNN  
-TAAT---

---

**NEMVEDRAFT\_v1g81309***forward**reverse compliment**Name**E value**Alignment**Motif*

MA0075.1\_Prrx2 3.3645e-03

NNNNATTAN  
---AATTA-

---

**CBG20882***forward**reverse compliment**Name**E value**Alignment**Motif*

MA0094.1\_Ubx 4.1346e-03

NYNATNNNN  
---ATTA--

---

**Hoxa6***forward**reverse compliment**Name**E value**Alignment**Motif*

MA0094.1\_Ubx 3.7532e-03

NNNNATTAN  
----ATTA-

---

**ceh-5***forward**reverse compliment**Name**E value**Alignment**Motif*

MA0075.1\_Prrx2 3.4502e-03

NNTAATNNN  
--TAATT--

---

**Nobox***forward**reverse compliment**Name**E value**Alignment**Motif*

MA0094.1\_Ubx 4.8980e-03

NNYNATNNN  
----ATTA-

---

**Nanog***forward**reverse compliment**Name**E value**Alignment**Motif*

MA0075.1\_Prrx2 4.5812e-03

NNNATNNNN  
-TAATT---

---

**Meox1***forward**reverse compliment**Name**E value**Alignment**Motif*

MA0075.1\_Prrx2 4.5297e-03

NTAATKRNN  
-TAATT---

---

**YOX1***forward**reverse compliment**Name**E value**Alignment**Motif*

MA0094.1\_Ubx 1.1609e-02

YNATWWN  
--ATTA--

---

**NEMVEDRAFT\_v1g136480***forward**reverse compliment*

| <i>Name</i>  | <i>E value</i> | <i>Alignment</i>         | <i>Motif</i> |
|--------------|----------------|--------------------------|--------------|
| MA0094.1_Ubx | 7.7218e-03     | NNNNNNNNNN<br>----ATTA-- |              |

---

**21\_TAC\_ERVSV***forward**reverse compliment*

| <i>Name</i>  | <i>E value</i> | <i>Alignment</i>         | <i>Motif</i> |
|--------------|----------------|--------------------------|--------------|
| MA0212.1_bcd | 2.7894e-03     | NCGYATTANN<br>--GGATTA-- |              |

---

**20\_TAC\_QRVSA***forward**reverse compliment*

| <i>Name</i> | <i>E value</i> | <i>Alignment</i> | <i>Motif</i> |
|-------------|----------------|------------------|--------------|
|-------------|----------------|------------------|--------------|

MA0203.1\_Scr 1.4870e-04

CGYATTARNN  
-TCATTAR--

---

**216\_TGC\_NRVMM***forward**reverse compliment*

| <i>Name</i> | <i>E value</i> | <i>Alignment</i> | <i>Motif</i> |
|-------------|----------------|------------------|--------------|
|-------------|----------------|------------------|--------------|

MA0212.1\_bcd 6.8226e-04

NGCATTARNN  
-GGATTA---

---

**235\_TAT\_RAVSV***forward**reverse compliment*

| <i>Name</i> | <i>E value</i> | <i>Alignment</i> | <i>Motif</i> |
|-------------|----------------|------------------|--------------|
|-------------|----------------|------------------|--------------|

MA0186.1\_Dfd 9.5367e-04

NNYTAA TGNN  
--TTAATGA-

---

**229\_TTC\_GRISA***forward**reverse compliment*

| <i>Name</i> | <i>E value</i> | <i>Alignment</i> | <i>Motif</i> |
|-------------|----------------|------------------|--------------|
|-------------|----------------|------------------|--------------|

MA0356.1\_PHO2 1.8486e-03

NNYATTANNN  
--TAWTAW--

---

**Hoxb8***forward**reverse compliment**Name**E value**Alignment**Motif*

MA0094.1\_Ubx

6.4583e-03

NNNNATWNN  
----ATTA-

---

**Hoxc8***forward**reverse compliment**Name**E value**Alignment**Motif*

MA0094.1\_Ubx

8.9132e-03

NNNNNNNNNN  
----ATTA-

---

**CBG00023***forward**reverse compliment**Name**E value**Alignment**Motif*



MA0094.1\_Ubx 5.4028e-03

NNNNNATWAN  
-----ATTG-

---

**Hmx2***forward**reverse compliment**Name**E value**Alignment**Motif*

MA0426.1\_YHP1 3.6198e-04

NNNCRNTTNN  
---CAATTA-

---

**Hmx1***forward**reverse compliment**Name**E value**Alignment**Motif*

MA0426.1\_YHP1 3.2593e-04

NNNCRNTTNN  
---CAATTA-

---

**SIX5***forward**reverse compliment**Name**E value**Alignment**Motif*

MA0335.1\_MET4 2.1780e-03

GARTTGTAGT  
-ANCTGTGG-

---

**schlank***forward**reverse compliment**Name**E value**Alignment**Motif*

MA0193.1\_Lag1 2.2828e-10

AWNTTGGTRG  
---TTGGTRG

---

**yox1***forward**reverse compliment**Name**E value**Alignment**Motif*

MA0075.1\_Prrx2 7.7965e-03

NNNNATNNNN  
--TAATT--

---

**Noto***forward**reverse compliment**Name**E value**Alignment**Motif*

MA0075.1\_Prrx2 6.3461e-03

NNNNATNNNN  
---AATTA--

---

**UNCX***forward**reverse compliment**Name**E value**Alignment**Motif*

MA0075.1\_Prrx2 1.8805e-03

NNAATTNN  
-TAATT--

---

**pha-2***forward**reverse compliment**Name**E value**Alignment**Motif*

MA0426.1\_YHP1 4.0154e-02

NNNNNATNNN  
---CAATTA-

---

**CG15696***forward**reverse compliment**Name**E value**Alignment**Motif*

MA0426.1\_YHP1 2.0724e-02

NNYAATNNN  
--CAATTA-

---

**CG34031***forward**reverse compliment**Name**E value**Alignment**Motif*

MA0426.1\_YHP1 2.0324e-02

NYNNNNNN  
-CAATTA-

---

**NEMVEDRAFT\_v1g80394***forward**reverse compliment**Name**E value**Alignment**Motif*

MA0426.1\_YHP1 1.3574e-02

NNNNATNNN  
--CAATTA-

---

**NOBOX***forward**reverse compliment**Name**E value**Alignment**Motif*

MA0426.1\_YHP1 3.2827e-02

NNYNATNNNN  
--CAATTA--

---

**IRX5**

|                    | <i>forward</i> | <i>reverse compliment</i>          |              |
|--------------------|----------------|------------------------------------|--------------|
| <i>Name</i>        | <i>E value</i> | <i>Alignment</i>                   | <i>Motif</i> |
| MA0328.1_MATALPHA2 | 3.9553e-05     | NNNTGTNNNACAYNN<br>-----AATTACATG- |              |

---

**MTAL2\_KLUDE**

|                    | <i>forward</i> | <i>reverse compliment</i> |              |
|--------------------|----------------|---------------------------|--------------|
| <i>Name</i>        | <i>E value</i> | <i>Alignment</i>          | <i>Motif</i> |
| MA0328.1_MATALPHA2 | 6.6896e-12     | CRTGTAAW-<br>CATGTAATT    |              |

---

**HMRA2**

|             | <i>forward</i> | <i>reverse compliment</i> |              |
|-------------|----------------|---------------------------|--------------|
| <i>Name</i> | <i>E value</i> | <i>Alignment</i>          | <i>Motif</i> |

MA0328.1\_MATALPHA2 1.7878e-12

-WTTACAYG  
AATTACATG

---

**Rhox8**

| <i>forward</i> |                | <i>reverse compliment</i> |              |
|----------------|----------------|---------------------------|--------------|
| <i>Name</i>    | <i>E value</i> | <i>Alignment</i>          | <i>Motif</i> |
| MA0392.1_STB5  | 2.3740e-05     | NTTACACCN<br>-TANNNCCG    |              |

---

**mirr**

| <i>forward</i> |                | <i>reverse compliment</i> |              |
|----------------|----------------|---------------------------|--------------|
| <i>Name</i>    | <i>E value</i> | <i>Alignment</i>          | <i>Motif</i> |
| MA0233.1_mirr  | 1.6159e-06     | TGTTWNNN<br>TGTTW---      |              |

---

**ara**

| <i>forward</i> |                | <i>reverse compliment</i> |              |
|----------------|----------------|---------------------------|--------------|
| <i>Name</i>    | <i>E value</i> | <i>Alignment</i>          | <i>Motif</i> |

MA0210.1\_ara 1.6159e-06

TGTTWTNN  
TGTTW---

---

**caup***forward**reverse compliment**Name**E value**Alignment**Motif*

MA0217.1\_caup 1.6159e-06

TGTTANWN  
TGTTA---

---

**CG11617***forward**reverse compliment**Name**E value**Alignment**Motif*

MA0173.1\_CG11617 1.4526e-07

-TGTWAAAW  
ATGTWAA--

---

**51\_CAG\_MSHWR***forward**reverse compliment**Name**E value**Alignment**Motif*

MA0217.1\_caup 1.9443e-06

NCTGTTAN  
--TGTTA-

---

**49\_CAT\_LSQSR**

| <i>forward</i>   |                | <i>reverse compliment</i> |              |
|------------------|----------------|---------------------------|--------------|
| <i>Name</i>      | <i>E value</i> | <i>Alignment</i>          | <i>Motif</i> |
| MA0173.1_CG11617 | 1.9340e-06     | NNTGTTARN<br>-ATGTWAA-    |              |

---

**253\_CGT\_VANSR**

| <i>forward</i> |                | <i>reverse compliment</i> |              |
|----------------|----------------|---------------------------|--------------|
| <i>Name</i>    | <i>E value</i> | <i>Alignment</i>          | <i>Motif</i> |
| MA0217.1_caup  | 4.9392e-06     | NNTGTTANN<br>--TGTTA--    |              |

---

**55\_CAA\_LHYVR**

| <i>forward</i> |                | <i>reverse compliment</i> |              |
|----------------|----------------|---------------------------|--------------|
| <i>Name</i>    | <i>E value</i> | <i>Alignment</i>          | <i>Motif</i> |
|                |                |                           |              |



MA0217.1\_caup 8.1367e-06

NNTTGTTANN  
---TGTTA--

---

**HMLALPHA2***forward**reverse compliment**Name**E value**Alignment**Motif*

MA0210.1\_ara

1.2090e-02

NNNGTNNN  
--TGTTW-

---

**MATALPHA2***forward**reverse compliment**Name**E value**Alignment**Motif*

MA0210.1\_ara

2.0207e-02

NNNGNNNN  
--TGTTW-

---

**CBG08197***forward**reverse compliment**Name**E value**Alignment**Motif*

MA0210.1\_ara 1.5637e-02

NNNGTNNN  
--TGTTW--

---

**Irx4***forward**reverse compliment**Name**E value**Alignment**Motif*

MA0210.1\_ara

8.5641e-03

NTNTNNNN  
-TGTTW--

---

**Irx6***forward**reverse compliment**Name**E value**Alignment**Motif*

MA0210.1\_ara

5.7942e-03

NTNTNNNN  
-TGTTW--

---

**Irx2***forward**reverse compliment**Name**E value**Alignment**Motif*

MA0210.1\_ara 1.6628e-02

NNNTGTNNN  
---TGTTW-

---

**Irx5***forward**reverse compliment**Name**E value**Alignment**Motif*

MA0210.1\_ara

1.3053e-02

NNTGTNNNN  
--TGTTW--

---

**AGAP009986***forward**reverse compliment**Name**E value**Alignment**Motif*

MA0210.1\_ara

2.8411e-02

NNNNTGTNNN  
----TGTTW-

---

**Rhox11***forward**reverse compliment**Name**E value**Alignment**Motif*

MA0210.1\_ara 2.0801e-02

NNNTGTWNNN  
---TGTW--

---

**MTAL2\_PICAN***forward**reverse compliment**Name**E value**Alignment**Motif*

MA0318.1\_HMRA2 1.0682e-01

NNNACANNN  
WTTACAYG-

---

**IRX1***forward**reverse compliment**Name**E value**Alignment**Motif*

MA0328.1\_MATALPHA2 9.6004e-06

NNCANNNNNNNNNTGNN  
-----AATTACATG--

---

**IRX3***forward**reverse compliment**Name**E value**Alignment**Motif*

MA0328.1\_MATALPHA2 8.9355e-05

WACAYGNWWWWNCRTGTW  
-----AATTACATG--

---

**FGRRS\_07914***forward**reverse compliment*

| <i>Name</i>        | <i>E value</i> | <i>Alignment</i>             | <i>Motif</i> |
|--------------------|----------------|------------------------------|--------------|
| MA0328.1_MATALPHA2 | 2.1882e-04     | NNACATGTANN-<br>---CATGTAATT |              |

---

**SNAPOd2T00005194001***forward**reverse compliment*

| <i>Name</i>        | <i>E value</i> | <i>Alignment</i>             | <i>Motif</i> |
|--------------------|----------------|------------------------------|--------------|
| MA0328.1_MATALPHA2 | 1.7656e-04     | -NNTACATGTNN<br>AATTACATG--- |              |

---

**ATHB-4***forward**reverse compliment*

| <i>Name</i> | <i>E value</i> | <i>Alignment</i> | <i>Motif</i> |
|-------------|----------------|------------------|--------------|
|-------------|----------------|------------------|--------------|

MA0254.1\_vvl 8.1236e-04

NNYATGCAKNN  
--TATKCA---

---

**hbx7***forward**reverse compliment**Name**E value**Alignment**Motif*

MA0322.1\_INO4 2.4836e-03

NNNANATGCNNNN  
TTCACATGC----

---

**IRX2***forward**reverse compliment**Name**E value**Alignment**Motif*

MA0207.1\_achi 6.9992e-04

NNTGTCRTGTWN  
-CTGTCA-----

---

**Irx3***forward**reverse compliment**Name**E value**Alignment**Motif*

MA0143.1\_Sox2 2.4858e-09

--TTTKTCATGTWR-  
CCWTTGTNATGCANA

---

**vis**

|              |                | <i>forward</i>   | <i>reverse compliment</i> |              |
|--------------|----------------|------------------|---------------------------|--------------|
| <i>Name</i>  | <i>E value</i> | <i>Alignment</i> |                           | <i>Motif</i> |
| MA0252.1_vis | 8.8622e-07     | NTGTCA<br>NTGTCA |                           |              |

---

**achi**

|              |                | <i>forward</i>   | <i>reverse compliment</i> |              |
|--------------|----------------|------------------|---------------------------|--------------|
| <i>Name</i>  | <i>E value</i> | <i>Alignment</i> |                           | <i>Motif</i> |
| MA0252.1_vis | 8.7480e-07     | NTGTCA<br>NTGTCA |                           |              |

---

**Meis2**

|             |                | <i>forward</i>   | <i>reverse compliment</i> |              |
|-------------|----------------|------------------|---------------------------|--------------|
| <i>Name</i> | <i>E value</i> | <i>Alignment</i> |                           | <i>Motif</i> |

MA0252.1\_vis 6.4391e-06

NTGTCAN  
NTGTCA-**MEIS1***forward**reverse compliment**Name**E value**Alignment**Motif*

MA0252.1\_vis

6.6419e-06

NTGACAN  
-TGACAN**Meis3***forward**reverse compliment**Name**E value**Alignment**Motif*

MA0227.1\_hth

6.6077e-06

NTGTCAN  
CTGTCA-**Meis1***forward**reverse compliment**Name**E value**Alignment**Motif*

MA0252.1\_vis

4.1357e-05

NNNTGTCAN  
--NTGTCA-



---

**ANHX**

| <i>forward</i> |                | <i>reverse compliment</i> |              |
|----------------|----------------|---------------------------|--------------|
| <i>Name</i>    | <i>E value</i> | <i>Alignment</i>          | <i>Motif</i> |
| MA0408.1_TOS8  | 5.5807e-06     | CWTGTCAA-<br>-NTGTCAAN    |              |

---

**FGRRES\_17152**

| <i>forward</i>     |                | <i>reverse compliment</i> |              |
|--------------------|----------------|---------------------------|--------------|
| <i>Name</i>        | <i>E value</i> | <i>Alignment</i>          | <i>Motif</i> |
| MA0328.1_MATALPHA2 | 7.6247e-08     | -ATGACATG<br>AATTACATG    |              |

---

**FGRRES\_17150**

| <i>forward</i> |                | <i>reverse compliment</i> |              |
|----------------|----------------|---------------------------|--------------|
| <i>Name</i>    | <i>E value</i> | <i>Alignment</i>          | <i>Motif</i> |
|                |                |                           |              |

MA0252.1\_vis 1.0847e-04

NNWTGTCAWN  
--NTGTCA--

---

**Tgif1***forward**reverse compliment**Name**E value**Alignment**Motif*

MA0227.1\_hth

6.8698e-05

NNNTGTCANN  
--CTGTCA--

---

**Tgif2***forward**reverse compliment**Name**E value**Alignment**Motif*

MA0227.1\_hth

6.9961e-05

NNNTGTCANN  
--CTGTCA--

---

**CUP9***forward**reverse compliment**Name**E value**Alignment**Motif*

MA0288.1\_CUP9

3.7091e-11

NWTGTGTGAN  
WWTGTGTCA-

---

**hbx4**

| <i>forward</i> |                | <i>reverse compliment</i> |              |
|----------------|----------------|---------------------------|--------------|
| <i>Name</i>    | <i>E value</i> | <i>Alignment</i>          | <i>Motif</i> |
| MA0227.1_hth   | 1.0419e-04     | NNNYGTCANN<br>--CTGTCA--  |              |

---

**CAGL0H02959g**

| <i>forward</i> |                | <i>reverse compliment</i> |              |
|----------------|----------------|---------------------------|--------------|
| <i>Name</i>    | <i>E value</i> | <i>Alignment</i>          | <i>Motif</i> |
| MA0227.1_hth   | 1.1990e-04     | NNNYGTCANN<br>--CTGTCA--  |              |

---

**ANIA\_00885**

| <i>forward</i> |                | <i>reverse compliment</i> |              |
|----------------|----------------|---------------------------|--------------|
| <i>Name</i>    | <i>E value</i> | <i>Alignment</i>          | <i>Motif</i> |
| MA0207.1_achi  | 1.9445e-04     | NNNTGTMANN<br>--CTGTCA--  |              |

---

**GRMZM2G087741***forward**reverse compliment*

| <i>Name</i>  | <i>E value</i> | <i>Alignment</i>         | <i>Motif</i> |
|--------------|----------------|--------------------------|--------------|
| MA0227.1_hth | 1.3141e-06     | NGMYGTCANN<br>--CTGTCA-- |              |

---

**GRMZM2G135447***forward**reverse compliment*

| <i>Name</i>  | <i>E value</i> | <i>Alignment</i>     | <i>Motif</i> |
|--------------|----------------|----------------------|--------------|
| MA0227.1_hth | 5.9773e-09     | SMYGTCAN<br>-CTGTCA- |              |

---

**KNAT7***forward**reverse compliment*

| <i>Name</i> | <i>E value</i> | <i>Alignment</i> | <i>Motif</i> |
|-------------|----------------|------------------|--------------|
|-------------|----------------|------------------|--------------|

MA0018.2\_CREB1 2.6336e-07

TGACRTCT  
TGACGTCA

---

**CBG24578***forward**reverse compliment*

| <i>Name</i>   | <i>E value</i> | <i>Alignment</i>             | <i>Motif</i> |
|---------------|----------------|------------------------------|--------------|
| MA0207.1_achi | 1.4139e-07     | NNNTGACAGSTN<br>---TGACAG--- |              |

---

**TGIF2***forward**reverse compliment*

| <i>Name</i>  | <i>E value</i> | <i>Alignment</i>            | <i>Motif</i> |
|--------------|----------------|-----------------------------|--------------|
| MA0227.1_hth | 3.1704e-07     | TGACANNTGTCA<br>-----CTGTCA |              |

---

**TGIF1***forward**reverse compliment*

| <i>Name</i> | <i>E value</i> | <i>Alignment</i> | <i>Motif</i> |
|-------------|----------------|------------------|--------------|
|-------------|----------------|------------------|--------------|

MA0207.1\_achi 1.8587e-07

TGACAGCTGTCA  
-----CTGTCA

---

**MEIS3***forward**reverse compliment**Name**E value**Alignment**Motif*

MA0227.1\_hth

1.3353e-06

TGACANNTGTCA  
-----CTGTCA

---

**MEIS2***forward**reverse compliment**Name**E value**Alignment**Motif*

MA0207.1\_achi

3.0941e-07

TGACAGCTGTCA  
TGACAG-----

---

**PKNOX1***forward**reverse compliment**Name**E value**Alignment**Motif*

MA0227.1\_hth 5.8002e-07

TGACASSTGTCA  
-----CTGTCA

---

**PKNOX2***forward**reverse compliment**Name**E value**Alignment**Motif*

MA0227.1\_hth 5.7190e-07

TGACANNTGTCA  
-----CTGTCA

---

**TGIF2LY***forward**reverse compliment**Name**E value**Alignment**Motif*

MA0227.1\_hth 3.0965e-07

TGACANNTGTCA  
-----CTGTCA

---

**TGIF2LX***forward**reverse compliment**Name**E value**Alignment**Motif*

MA0227.1\_hth 2.5463e-07

TGACANCTGTCA  
-----CTGTCA

---

**Pknox2***forward**reverse compliment**Name**E value**Alignment**Motif*

MA0207.1\_achi 1.0777e-07

TGACAGGTGTCA  
TGACAG-----

---

**Q5EVH4\_OIKDI***forward**reverse compliment**Name**E value**Alignment**Motif*

MA0227.1\_hth 5.3087e-09

NCTGTCAN  
-CTGTCA-

---

**HOS66***forward**reverse compliment**Name**E value**Alignment**Motif*



MA0089.1\_NFE2L1\_MafG 2.0629e-02

NNNNNNNN  
--GTCATN

---

**KNAT4***forward* *reverse compliment*

| <i>Name</i>          | <i>E value</i> | <i>Alignment</i>          | <i>Motif</i> |
|----------------------|----------------|---------------------------|--------------|
| MA0089.1_NFE2L1_MafG | 1.2367e-02     | NNNNGTCNN--<br>----GTCATN |              |

---

**Q0ZPQ8\_NEMVE***forward* *reverse compliment*

| <i>Name</i>   | <i>E value</i> | <i>Alignment</i>       | <i>Motif</i> |
|---------------|----------------|------------------------|--------------|
| MA0207.1_achi | 1.1053e-02     | NTGACRNNN<br>-TGACAG-- |              |

---

**KNAT3***forward* *reverse compliment*

| <i>Name</i> | <i>E value</i> | <i>Alignment</i> | <i>Motif</i> |
|-------------|----------------|------------------|--------------|
|-------------|----------------|------------------|--------------|

MA0207.1\_achi 1.4978e-02

NNNNGTCNNN  
--CTGTCA--

---

**PK25034.1***forward**reverse compliment**Name**E value**Alignment**Motif*

MA0207.1\_achi 1.4895e-02

NNMNGTCANN  
--CTGTCA--

---

**KNAT6***forward**reverse compliment**Name**E value**Alignment**Motif*

MA0207.1\_achi 1.6623e-02

NNNNGTCNNN  
--CTGTCA--

---

**unc-62***forward**reverse compliment**Name**E value**Alignment**Motif*

MA0207.1\_achi 1.5344e-02

NNNTNTNNN  
--CTGTCA--

---

**Pknox1**

| <i>forward</i> |                | <i>reverse compliment</i> |              |
|----------------|----------------|---------------------------|--------------|
| <i>Name</i>    | <i>E value</i> | <i>Alignment</i>          | <i>Motif</i> |
| MA0227.1_hth   | 7.0473e-03     | NNNTGTCN<br>--CTGTCA      |              |

---

**FGRRS\_16926\_M**

| <i>forward</i> |                | <i>reverse compliment</i> |              |
|----------------|----------------|---------------------------|--------------|
| <i>Name</i>    | <i>E value</i> | <i>Alignment</i>          | <i>Motif</i> |
| MA0207.1_achi  | 1.4605e-02     | NNTGTNNN<br>-CTGTCA-      |              |

---

**FGRRS\_17238**

| <i>forward</i> |                | <i>reverse compliment</i> |              |
|----------------|----------------|---------------------------|--------------|
| <i>Name</i>    | <i>E value</i> | <i>Alignment</i>          | <i>Motif</i> |

MA0207.1\_achi 2.7682e-02

NNNNACNNNN  
--TGACAG--

---

**CADAORAG00002315***forward**reverse compliment**Name**E value**Alignment**Motif*

MA0227.1\_hth

2.1428e-02

NNNTGTNNNN  
--CTGTCA--

---

**ATEG\_00670***forward**reverse compliment**Name**E value**Alignment**Motif*

MA0227.1\_hth

3.4042e-02

NNNGTNNNN  
-CTGTCA--

---

**TVAG\_451170***forward**reverse compliment**Name**E value**Alignment**Motif*

MA0246.1\_so 1.2975e-03

NNCRCATCAN  
---GTATCA-

---

**TVAG\_493070***forward**reverse compliment**Name**E value**Alignment**Motif*

MA0129.1\_TGA1A 2.3900e-03

NNTGATGTGNN  
--TGACGTN--

---

**TOS8***forward**reverse compliment**Name**E value**Alignment**Motif*

MA0018.2\_CREB1 8.6372e-07

WKACGTCANNN  
TGACGTCA---

---

**CBG10835***forward**reverse compliment**Name**E value**Alignment**Motif*

MA0199.1\_Optix 1.5682e-02

NNNNTCANN  
--TATCA--

---

**Phyra73700***forward**reverse compliment**Name**E value**Alignment**Motif*

MA0199.1\_Optix 1.5829e-02

NNNNNNTCAN  
----TATCA-

---

**si\_dkey-43p13.5***forward**reverse compliment**Name**E value**Alignment**Motif*

MA0210.1\_ara 7.5942e-02

NNNNWWNNNN  
--TGTTW---

---

**PK24181.1***forward**reverse compliment**Name**E value**Alignment**Motif*

MA0227.1\_hth 4.3791e-02

NNNNNNNNNN--  
-----CTGTCA

---

**Six4***forward**reverse compliment**Name**E value**Alignment**Motif*

MA0204.1\_Six4 3.2262e-02

NNNKNTNNN  
--GTNTCA-

---

**Six2***forward**reverse compliment**Name**E value**Alignment**Motif*

MA0246.1\_so 1.2907e-02

NNNTATNN  
--GTATCA

---

**Six1***forward**reverse compliment**Name**E value**Alignment**Motif*

MA0246.1\_so 2.2537e-02

NNNRTATNNN  
---GTATCA-

---

**S0**

|             |                | <i>forward</i>       | <i>reverse compliment</i> |
|-------------|----------------|----------------------|---------------------------|
| <i>Name</i> | <i>E value</i> | <i>Alignment</i>     | <i>Motif</i>              |
| MA0246.1_so | 7.0329e-09     | NGTATCAN<br>-GTATCA- |                           |

---

**SIX2**

|             |                | <i>forward</i>           | <i>reverse compliment</i> |
|-------------|----------------|--------------------------|---------------------------|
| <i>Name</i> | <i>E value</i> | <i>Alignment</i>         | <i>Motif</i>              |
| MA0246.1_so | 2.7271e-07     | NNYGATACNN<br>--TGATAC-- |                           |

---

**SIX4**

|             |                | <i>forward</i>   | <i>reverse compliment</i> |
|-------------|----------------|------------------|---------------------------|
| <i>Name</i> | <i>E value</i> | <i>Alignment</i> | <i>Motif</i>              |



MA0246.1\_so 1.5465e-07

NNYGATACNN  
--TGATAC--

---

**SIX1***forward**reverse compliment**Name**E value**Alignment**Motif*

MA0246.1\_so

9.5689e-05

NCGTATCRNN  
--GTATCA--

---

**ceh-34***forward**reverse compliment**Name**E value**Alignment**Motif*

MA0246.1\_so

3.0430e-02

NNNRKATNNN  
---GTATCA-

---

**XP\_003689450.1***forward**reverse compliment**Name**E value**Alignment**Motif*

MA0036.1\_GATA2 5.8039e-02

NNNGKNTNNN  
---NGATN--

---

**Q6Y859\_MARMO***forward**reverse compliment**Name**E value**Alignment**Motif*

MA0199.1\_Optix 5.3920e-03

NNNATNNNNN  
--TATCA---

---

**PRH\_PETCR***forward**reverse compliment**Name**E value**Alignment**Motif*

MA0345.1\_NHP6A 4.6352e-09

-----TWATATAT-----  
NNNNNNTTATATANNRNNNNN

---

**hbx2***forward**reverse compliment**Name**E value**Alignment**Motif*

MA0379.1\_SIG1 6.3617e-06

NNATATATWN  
---TATAT--

---

**PDF2**

|               | <i>forward</i> | <i>reverse compliment</i>         |              |
|---------------|----------------|-----------------------------------|--------------|
| <i>Name</i>   | <i>E value</i> | <i>Alignment</i>                  | <i>Motif</i> |
| MA0277.1_AZF1 | 1.1933e-03     | NNNGAATATTCYNTN-<br>-----TTTCTTTT |              |

---

**KLLA0\_D10043g**

|               | <i>forward</i> | <i>reverse compliment</i> |              |
|---------------|----------------|---------------------------|--------------|
| <i>Name</i>   | <i>E value</i> | <i>Alignment</i>          | <i>Motif</i> |
| MA0379.1_SIG1 | 8.4022e-03     | NNNNNNNNNN<br>--TATAT--   |              |

---

**NEMVEDRAFT\_v1g81436**

|             | <i>forward</i> | <i>reverse compliment</i> |              |
|-------------|----------------|---------------------------|--------------|
| <i>Name</i> | <i>E value</i> | <i>Alignment</i>          | <i>Motif</i> |

MA0216.1\_cad 9.7454e-02

NNNNNNANNNN  
---YAATAAA

---

**ANIA\_01217***forward**reverse compliment**Name**E value**Alignment**Motif*

MA0216.1\_cad

6.6209e-02

NNNNAATANN  
---YAATAAA

---

**ZHX1***forward**reverse compliment**Name**E value**Alignment**Motif*

MA0129.1\_TGA1A 1.0082e-01

NNNNRNNN  
TGACGTN-

---

**ceh-74***forward**reverse compliment**Name**E value**Alignment**Motif*

MA0436.1\_YPR022C 6.6468e-03

NNGTGAGGNNN  
-NGTG GGG---

---

**CAD25866***forward**reverse compliment*

| <i>Name</i> | <i>E value</i> | <i>Alignment</i> | <i>Motif</i> |
|-------------|----------------|------------------|--------------|
|-------------|----------------|------------------|--------------|

|              |            |
|--------------|------------|
| MA0227.1_hth | 2.3133e-03 |
|--------------|------------|

|                            |
|----------------------------|
| NMTCTCAANNN<br>-CTGTCA---- |
|----------------------------|

---

**NKX2-1***forward**reverse compliment*

| <i>Name</i> | <i>E value</i> | <i>Alignment</i> | <i>Motif</i> |
|-------------|----------------|------------------|--------------|
|-------------|----------------|------------------|--------------|

|              |            |
|--------------|------------|
| MA0211.1_bap | 7.5503e-05 |
|--------------|------------|

|                          |
|--------------------------|
| NNCACTCMAN<br>--CACTTAA- |
|--------------------------|

---

**ATHB-12***forward**reverse compliment*

| <i>Name</i> | <i>E value</i> | <i>Alignment</i> | <i>Motif</i> |
|-------------|----------------|------------------|--------------|
|-------------|----------------|------------------|--------------|

MA0089.1\_NFE2L1\_MafG 2.0267e-01

NNNNNNNN  
-NATGAC-

---

**RLT1**

| <i>forward</i> |                | <i>reverse compliment</i> |              |
|----------------|----------------|---------------------------|--------------|
| <i>Name</i>    | <i>E value</i> | <i>Alignment</i>          | <i>Motif</i> |
| MA0127.1_PEND  | 3.5933e-02     | --NANGAANN<br>MATAAGAANT  |              |

---

**PK25011.1**

| <i>forward</i>       |                | <i>reverse compliment</i> |              |
|----------------------|----------------|---------------------------|--------------|
| <i>Name</i>          | <i>E value</i> | <i>Alignment</i>          | <i>Motif</i> |
| MA0089.1_NFE2L1_MafG | 1.5545e-01     | NNNNNNNAWNN<br>---GTCATN- |              |

---

**CIMG\_06089**

| <i>forward</i> |                | <i>reverse compliment</i> |              |
|----------------|----------------|---------------------------|--------------|
| <i>Name</i>    | <i>E value</i> | <i>Alignment</i>          | <i>Motif</i> |

MA0318.1\_HMRA2 3.1007e-01

NNNNNNNNNN--  
---CRTGTAAW

---

Sequence logo generation powered by [weblogo](#)  
[STAMP](#) is written by Shaun Mahony
