# Supplementary figures and images for: Learning probabilistic protein–DNA recognition codes from DNA-binding specificities using structural mappings (part 1 of 25)
Source: HighWire-hosted journal article supplement (doi:10.1101/gr.276606.122), 2022-09-01

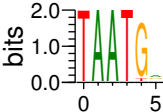

WebLogo 3.6.0

Supplement: SUPPLEMENTAL_Matl.zip [file 10_TGG_KSVMQ_KRPRVMNQK_0.pdf › SUPPLEMENTAL_Matl/rCLAMPS/STAMP/alignedLogos_NoyesGrps/logos_1/10_TGG_KSVMQ_KRPRVMNQK_0.pdf]

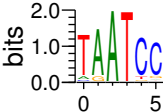

WebLogo 3.6.0

Supplement: SUPPLEMENTAL_Matl.zip [file 13_TCT_ATVKA_KRPRVKNAK_1.pdf › SUPPLEMENTAL_Matl/rCLAMPS/STAMP/alignedLogos_NoyesGrps/logos_1/13_TCT_ATVKA_KRPRVKNAK_1.pdf]

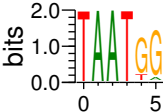

WebLogo 3.6.0

Supplement: SUPPLEMENTAL_Matl.zip [file 14_TCG_KGTQM_KRPRTQNMK_2.pdf › SUPPLEMENTAL_Matl/rCLAMPS/STAMP/alignedLogos_NoyesGrps/logos_1/14_TCG_KGTQM_KRPRTQNMK_2.pdf]

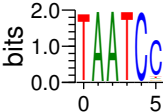

WebLogo 3.6.0

Supplement: SUPPLEMENTAL_Matl.zip [file 15_TCC_RMIKS_KRPRIKNSK_3.pdf › SUPPLEMENTAL_Matl/rCLAMPS/STAMP/alignedLogos_NoyesGrps/logos_1/15_TCC_RMIKS_KRPRIKNSK_3.pdf]

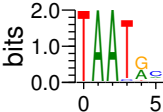

WebLogo 3.6.0

Supplement: SUPPLEMENTAL_Matl.zip [file 17_TAT_TRVSA_KRPRVSNAK_4.pdf › SUPPLEMENTAL_Matl/rCLAMPS/STAMP/alignedLogos_NoyesGrps/logos_1/17_TAT_TRVSA_KRPRVSNAK_4.pdf]

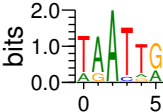

WebLogo 3.6.0

Supplement: SUPPLEMENTAL_Matl.zip [file 18_TAG_RLTQA_KRPRTQNAK_5.pdf › SUPPLEMENTAL_Matl/rCLAMPS/STAMP/alignedLogos_NoyesGrps/logos_1/18_TAG_RLTQA_KRPRTQNAK_5.pdf]

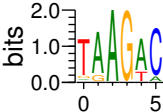

WebLogo 3.6.0

Supplement: SUPPLEMENTAL_Matl.zip [file 203_GTC_VQKRF_KRPRKRNFK_6.pdf › SUPPLEMENTAL_Matl/rCLAMPS/STAMP/alignedLogos_NoyesGrps/logos_1/203_GTC_VQKRF_KRPRKRNFK_6.pdf]

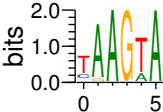

WebLogo 3.6.0

Supplement: SUPPLEMENTAL_Matl.zip [file 205_GAA_TQRQW_KRPRRQNWK_7.pdf › SUPPLEMENTAL_Matl/rCLAMPS/STAMP/alignedLogos_NoyesGrps/logos_1/205_GAA_TQRQW_KRPRRQNWK_7.pdf]

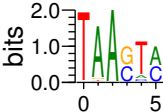

WebLogo 3.6.0

Supplement: SUPPLEMENTAL_Matl.zip [file 208_CTC_HFNRK_KRPRNRNKK_8.pdf › SUPPLEMENTAL_Matl/rCLAMPS/STAMP/alignedLogos_NoyesGrps/logos_1/208_CTC_HFNRK_KRPRNRNKK_8.pdf]

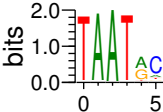

WebLogo 3.6.0

Supplement: SUPPLEMENTAL_Matl.zip [file 20_TAC_QRVSA_KRPRVSNAK_9.pdf › SUPPLEMENTAL_Matl/rCLAMPS/STAMP/alignedLogos_NoyesGrps/logos_1/20_TAC_QRVSA_KRPRVSNAK_9.pdf]

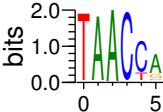

WebLogo 3.6.0

Supplement: SUPPLEMENTAL_Matl.zip [file 210_CCG_RSNQK_KRPRNQNKK_10.pdf › SUPPLEMENTAL_Matl/rCLAMPS/STAMP/alignedLogos_NoyesGrps/logos_1/210_CCG_RSNQK_KRPRNQNKK_10.pdf]

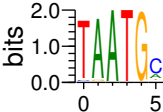

WebLogo 3.6.0

Supplement: SUPPLEMENTAL_Matl.zip [file 216_TGC_NRVMM_KRPRVMNMK_11.pdf › SUPPLEMENTAL_Matl/rCLAMPS/STAMP/alignedLogos_NoyesGrps/logos_1/216_TGC_NRVMM_KRPRVMNMK_11.pdf]

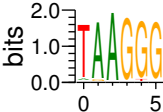

WebLogo 3.6.0

Supplement: SUPPLEMENTAL_Matl.zip [file 217_GGG_KSKEG_KRPRKENGK_12.pdf › SUPPLEMENTAL_Matl/rCLAMPS/STAMP/alignedLogos_NoyesGrps/logos_1/217_GGG_KSKEG_KRPRKENGK_12.pdf]

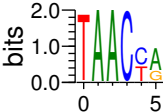

WebLogo 3.6.0

Supplement: SUPPLEMENTAL_Matl.zip [file 218_CTG_KQNQK_KRPRNQNKK_13.pdf › SUPPLEMENTAL_Matl/rCLAMPS/STAMP/alignedLogos_NoyesGrps/logos_1/218_CTG_KQNQK_KRPRNQNKK_13.pdf]

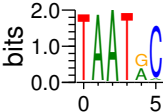

WebLogo 3.6.0

Supplement: SUPPLEMENTAL_Matl.zip [file 21_TAC_ERVSV_KRPRVSNVK_14.pdf › SUPPLEMENTAL_Matl/rCLAMPS/STAMP/alignedLogos_NoyesGrps/logos_1/21_TAC_ERVSV_KRPRVSNVK_14.pdf]

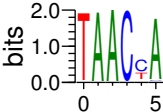

WebLogo 3.6.0

Supplement: SUPPLEMENTAL_Matl.zip [file 220_CTG_LTYQK_KRPRYQNKK_15.pdf › SUPPLEMENTAL_Matl/rCLAMPS/STAMP/alignedLogos_NoyesGrps/logos_1/220_CTG_LTYQK_KRPRYQNKK_15.pdf]

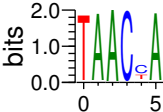

WebLogo 3.6.0

Supplement: SUPPLEMENTAL_Matl.zip [file 221_CTG_RLYQK_KRPRYQNKK_16.pdf › SUPPLEMENTAL_Matl/rCLAMPS/STAMP/alignedLogos_NoyesGrps/logos_1/221_CTG_RLYQK_KRPRYQNKK_16.pdf]

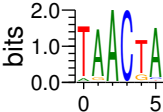

WebLogo 3.6.0

Supplement: SUPPLEMENTAL_Matl.zip [file 223_CTC_RTFGK_KRPRFGNKK_17.pdf › SUPPLEMENTAL_Matl/rCLAMPS/STAMP/alignedLogos_NoyesGrps/logos_1/223_CTC_RTFGK_KRPRFGNKK_17.pdf]

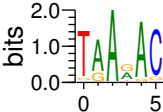

WebLogo 3.6.0

Supplement: SUPPLEMENTAL_Matl.zip [file 225_AAC_SLQRF_KRPRQRNFK_18.pdf › SUPPLEMENTAL_Matl/rCLAMPS/STAMP/alignedLogos_NoyesGrps/logos_1/225_AAC_SLQRF_KRPRQRNFK_18.pdf]

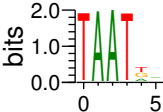

WebLogo 3.6.0

Supplement: SUPPLEMENTAL_Matl.zip [file 226_TTT_KMISA_KRPRISNAK_19.pdf › SUPPLEMENTAL_Matl/rCLAMPS/STAMP/alignedLogos_NoyesGrps/logos_1/226_TTT_KMISA_KRPRISNAK_19.pdf]

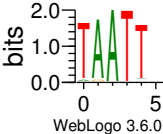

Supplement: SUPPLEMENTAL_Matl.zip [file 227_TTT_YRIAA_KRPRIANAK_20.pdf › SUPPLEMENTAL_Matl/rCLAMPS/STAMP/alignedLogos_NoyesGrps/logos_1/227_TTT_YRIAA_KRPRIANAK_20.pdf]

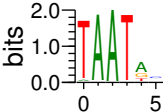

WebLogo 3.6.0

Supplement: SUPPLEMENTAL_Matl.zip [file 229_TTC_GRISA_KRPRISNAK_21.pdf › SUPPLEMENTAL_Matl/rCLAMPS/STAMP/alignedLogos_NoyesGrps/logos_1/229_TTC_GRISA_KRPRISNAK_21.pdf]

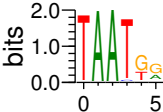

WebLogo 3.6.0

Supplement: SUPPLEMENTAL_Matl.zip [file 232_TCG_IKNQM_KRPRNQNMK_22.pdf › SUPPLEMENTAL_Matl/rCLAMPS/STAMP/alignedLogos_NoyesGrps/logos_1/232_TCG_IKNQM_KRPRNQNMK_22.pdf]

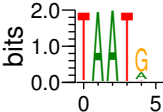

WebLogo 3.6.0

Supplement: SUPPLEMENTAL_Matl.zip [file 235_TAT_RAVSV_KRPRVSNVK_23.pdf › SUPPLEMENTAL_Matl/rCLAMPS/STAMP/alignedLogos_NoyesGrps/logos_1/235_TAT_RAVSV_KRPRVSNVK_23.pdf]

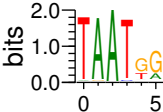

WebLogo 3.6.0

Supplement: SUPPLEMENTAL_Matl.zip [file 236_TAG_KSTQM_KRPRTQNMK_24.pdf › SUPPLEMENTAL_Matl/rCLAMPS/STAMP/alignedLogos_NoyesGrps/logos_1/236_TAG_KSTQM_KRPRTQNMK_24.pdf]

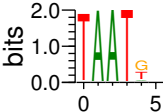

WebLogo 3.6.0

Supplement: SUPPLEMENTAL_Matl.zip [file 237_TAG_YAVNA_KRPRVNNAK_25.pdf › SUPPLEMENTAL_Matl/rCLAMPS/STAMP/alignedLogos_NoyesGrps/logos_1/237_TAG_YAVNA_KRPRVNNAK_25.pdf]

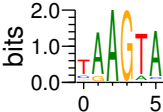

WebLogo 3.6.0

Supplement: SUPPLEMENTAL_Matl.zip [file 241_GTT_GLRAF_KRPRRANFK_26.pdf › SUPPLEMENTAL_Matl/rCLAMPS/STAMP/alignedLogos_NoyesGrps/logos_1/241_GTT_GLRAF_KRPRRANFK_26.pdf]

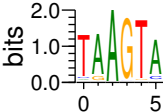

WebLogo 3.6.0

Supplement: SUPPLEMENTAL_Matl.zip [file 242_GTC_LQRGA_KRPRRGNAK_27.pdf › SUPPLEMENTAL_Matl/rCLAMPS/STAMP/alignedLogos_NoyesGrps/logos_1/242_GTC_LQRGA_KRPRRGNAK_27.pdf]

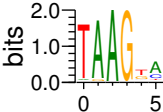

WebLogo 3.6.0

Supplement: SUPPLEMENTAL_Matl.zip [file 243_GGT_ATKSM_KRPRKSNMK_28.pdf › SUPPLEMENTAL_Matl/rCLAMPS/STAMP/alignedLogos_NoyesGrps/logos_1/243_GGT_ATKSM_KRPRKSNMK_28.pdf]

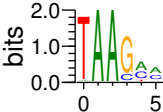

WebLogo 3.6.0

Supplement: SUPPLEMENTAL_Matl.zip [file 247_GCG_RTDRS_KRPRDRNSK_29.pdf › SUPPLEMENTAL_Matl/rCLAMPS/STAMP/alignedLogos_NoyesGrps/logos_1/247_GCG_RTDRS_KRPRDRNSK_29.pdf]

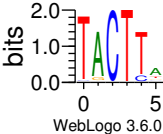

Supplement: SUPPLEMENTAL_Matl.zip [file 249_GCA_QLKQS_KRPRKQNSK_30.pdf › SUPPLEMENTAL_Matl/rCLAMPS/STAMP/alignedLogos_NoyesGrps/logos_1/249_GCA_QLKQS_KRPRKQNSK_30.pdf]

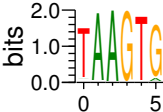

WebLogo 3.6.0

Supplement: SUPPLEMENTAL_Matl.zip [file 24_GTG_HLIQY_KRPRIQNYK_31.pdf › SUPPLEMENTAL_Matl/rCLAMPS/STAMP/alignedLogos_NoyesGrps/logos_1/24_GTG_HLIQY_KRPRIQNYK_31.pdf]

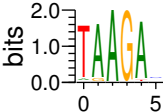

WebLogo 3.6.0

Supplement: SUPPLEMENTAL_Matl.zip [file 250_GAT_AGKTF_KRPRKTNFK_32.pdf › SUPPLEMENTAL_Matl/rCLAMPS/STAMP/alignedLogos_NoyesGrps/logos_1/250_GAT_AGKTF_KRPRKTNFK_32.pdf]

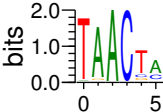

WebLogo 3.6.0

Supplement: SUPPLEMENTAL_Matl.zip [file 252_CTC_LRYSK_KRPRYSNKK_33.pdf › SUPPLEMENTAL_Matl/rCLAMPS/STAMP/alignedLogos_NoyesGrps/logos_1/252_CTC_LRYSK_KRPRYSNKK_33.pdf]

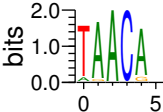

WebLogo 3.6.0

Supplement: SUPPLEMENTAL_Matl.zip [file 253_CGT_VANSR_KRPRNSNRK_34.pdf › SUPPLEMENTAL_Matl/rCLAMPS/STAMP/alignedLogos_NoyesGrps/logos_1/253_CGT_VANSR_KRPRNSNRK_34.pdf]

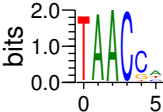

WebLogo 3.6.0

Supplement: SUPPLEMENTAL_Matl.zip [file 255_CCT_RADGK_KRPRDGNKK_35.pdf › SUPPLEMENTAL_Matl/rCLAMPS/STAMP/alignedLogos_NoyesGrps/logos_1/255_CCT_RADGK_KRPRDGNKK_35.pdf]

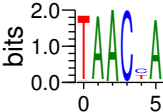

WebLogo 3.6.0

Supplement: SUPPLEMENTAL_Matl.zip [file 256_CCA_RLYQK_KRPRYQNKK_36.pdf › SUPPLEMENTAL_Matl/rCLAMPS/STAMP/alignedLogos_NoyesGrps/logos_1/256_CCA_RLYQK_KRPRYQNKK_36.pdf]

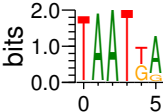

Supplement: SUPPLEMENTAL_Matl.zip [file 258_ATT_RTVQQ_KRPRVQNQK_37.pdf › SUPPLEMENTAL_Matl/rCLAMPS/STAMP/alignedLogos_NoyesGrps/logos_1/258_ATT_RTVQQ_KRPRVQNQK_37.pdf]

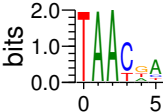

WebLogo 3.6.0

Supplement: SUPPLEMENTAL_Matl.zip [file 260_ATA_KAYNA_KRPRYNNAK_38.pdf › SUPPLEMENTAL_Matl/rCLAMPS/STAMP/alignedLogos_NoyesGrps/logos_1/260_ATA_KAYNA_KRPRYNNAK_38.pdf]

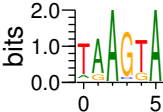

WebLogo 3.6.0

Supplement: SUPPLEMENTAL_Matl.zip [file 263_AGA_VRFAA_KRPRFANAK_39.pdf › SUPPLEMENTAL_Matl/rCLAMPS/STAMP/alignedLogos_NoyesGrps/logos_1/263_AGA_VRFAA_KRPRFANAK_39.pdf]

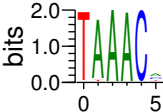

WebLogo 3.6.0

Supplement: SUPPLEMENTAL_Matl.zip [file 264_ACT_KVYHV_KRPRYHNVK_40.pdf › SUPPLEMENTAL_Matl/rCLAMPS/STAMP/alignedLogos_NoyesGrps/logos_1/264_ACT_KVYHV_KRPRYHNVK_40.pdf]

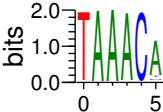

WebLogo 3.6.0

Supplement: SUPPLEMENTAL_Matl.zip [file 267_ACA_RVSHT_KRPRSHNTK_41.pdf › SUPPLEMENTAL_Matl/rCLAMPS/STAMP/alignedLogos_NoyesGrps/logos_1/267_ACA_RVSHT_KRPRSHNTK_41.pdf]

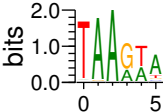

WebLogo 3.6.0

Supplement: SUPPLEMENTAL_Matl.zip [file 268_AAT_KLQAF_KRPRQANFK_42.pdf › SUPPLEMENTAL_Matl/rCLAMPS/STAMP/alignedLogos_NoyesGrps/logos_1/268_AAT_KLQAF_KRPRQANFK_42.pdf]

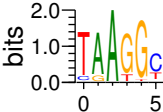

WebLogo 3.6.0

Supplement: SUPPLEMENTAL_Matl.zip [file 26_GGT_ALKNM_KRPRKNNMK_43.pdf › SUPPLEMENTAL_Matl/rCLAMPS/STAMP/alignedLogos_NoyesGrps/logos_1/26_GGT_ALKNM_KRPRKNNMK_43.pdf]

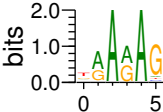

WebLogo 3.6.0

Supplement: SUPPLEMENTAL_Matl.zip [file 270_AAG_RAQWF_KRPRQWNFK_44.pdf › SUPPLEMENTAL_Matl/rCLAMPS/STAMP/alignedLogos_NoyesGrps/logos_1/270_AAG_RAQWF_KRPRQWNFK_44.pdf]

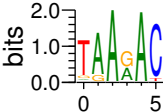

WebLogo 3.6.0

Supplement: SUPPLEMENTAL_Matl.zip [file 271_AAC_KLQRF_KRPRQRNFK_45.pdf › SUPPLEMENTAL_Matl/rCLAMPS/STAMP/alignedLogos_NoyesGrps/logos_1/271_AAC_KLQRF_KRPRQRNFK_45.pdf]

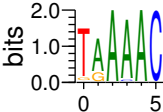

WebLogo 3.6.0

Supplement: SUPPLEMENTAL_Matl.zip [file 272_AAC_VAQRC_KRPRQRNCK_46.pdf › SUPPLEMENTAL_Matl/rCLAMPS/STAMP/alignedLogos_NoyesGrps/logos_1/272_AAC_VAQRC_KRPRQRNCK_46.pdf]

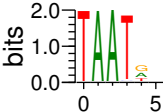

WebLogo 3.6.0

Supplement: SUPPLEMENTAL_Matl.zip [file 2_TTT_RTVSA_KRPRVSNAK_47.pdf › SUPPLEMENTAL_Matl/rCLAMPS/STAMP/alignedLogos_NoyesGrps/logos_1/2_TTT_RTVSA_KRPRVSNAK_47.pdf]

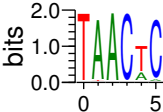

WebLogo 3.6.0

Supplement: SUPPLEMENTAL_Matl.zip [file 303_CTC_VMNRK_KRPRNRNKK_48.pdf › SUPPLEMENTAL_Matl/rCLAMPS/STAMP/alignedLogos_NoyesGrps/logos_1/303_CTC_VMNRK_KRPRNRNKK_48.pdf]

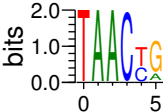

WebLogo 3.6.0

Supplement: SUPPLEMENTAL_Matl.zip [file 304_CTG_TTNQK_KRPRNQNKK_49.pdf › SUPPLEMENTAL_Matl/rCLAMPS/STAMP/alignedLogos_NoyesGrps/logos_1/304_CTG_TTNQK_KRPRNQNKK_49.pdf]

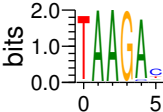

WebLogo 3.6.0

Supplement: SUPPLEMENTAL_Matl.zip [file 308_GCG_RLDRF_KRPRDRNFK_50.pdf › SUPPLEMENTAL_Matl/rCLAMPS/STAMP/alignedLogos_NoyesGrps/logos_1/308_GCG_RLDRF_KRPRDRNFK_50.pdf]

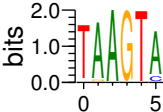

WebLogo 3.6.0

Supplement: SUPPLEMENTAL_Matl.zip [file 310_GTC_YRRGA_KRPRRGNAK_51.pdf › SUPPLEMENTAL_Matl/rCLAMPS/STAMP/alignedLogos_NoyesGrps/logos_1/310_GTC_YRRGA_KRPRRGNAK_51.pdf]

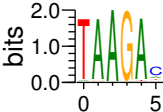

WebLogo 3.6.0

Supplement: SUPPLEMENTAL_Matl.zip [file 34_GAT_RTMRY_KRPRMRNYK_52.pdf › SUPPLEMENTAL_Matl/rCLAMPS/STAMP/alignedLogos_NoyesGrps/logos_1/34_GAT_RTMRY_KRPRMRNYK_52.pdf]

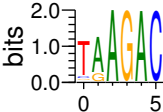

WebLogo 3.6.0

Supplement: SUPPLEMENTAL_Matl.zip [file 36_GAC_ATRRF_KRPRRRNFK_53.pdf › SUPPLEMENTAL_Matl/rCLAMPS/STAMP/alignedLogos_NoyesGrps/logos_1/36_GAC_ATRRF_KRPRRRNFK_53.pdf]

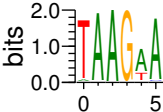

WebLogo 3.6.0

Supplement: SUPPLEMENTAL_Matl.zip [file 37_GAA_RFQKF_KRPRQKNFK_54.pdf › SUPPLEMENTAL_Matl/rCLAMPS/STAMP/alignedLogos_NoyesGrps/logos_1/37_GAA_RFQKF_KRPRQKNFK_54.pdf]

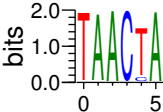

Supplement: SUPPLEMENTAL_Matl.zip [file 38_CTA_LHYAK_KRPRYANKK_55.pdf › SUPPLEMENTAL_Matl/rCLAMPS/STAMP/alignedLogos_NoyesGrps/logos_1/38_CTA_LHYAK_KRPRYANKK_55.pdf]

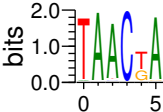

WebLogo 3.6.0

Supplement: SUPPLEMENTAL_Matl.zip [file 39_CTA_IFNAK_KRPRNANKK_56.pdf › SUPPLEMENTAL_Matl/rCLAMPS/STAMP/alignedLogos_NoyesGrps/logos_1/39_CTA_IFNAK_KRPRNANKK_56.pdf]

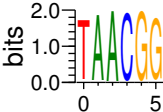

WebLogo 3.6.0

Supplement: SUPPLEMENTAL_Matl.zip [file 40_CGG_STRER_KRPRRENRK_57.pdf › SUPPLEMENTAL_Matl/rCLAMPS/STAMP/alignedLogos_NoyesGrps/logos_1/40_CGG_STRER_KRPRRENRK_57.pdf]

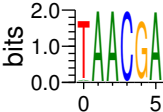

WebLogo 3.6.0

Supplement: SUPPLEMENTAL_Matl.zip [file 42_CGA_TFYAA_KRPRYANAK_58.pdf › SUPPLEMENTAL_Matl/rCLAMPS/STAMP/alignedLogos_NoyesGrps/logos_1/42_CGA_TFYAA_KRPRYANAK_58.pdf]

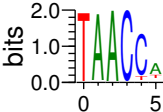

WebLogo 3.6.0

Supplement: SUPPLEMENTAL_Matl.zip [file 43_CCT_MTNGK_KRPRNGNKK_59.pdf › SUPPLEMENTAL_Matl/rCLAMPS/STAMP/alignedLogos_NoyesGrps/logos_1/43_CCT_MTNGK_KRPRNGNKK_59.pdf]

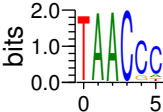

WebLogo 3.6.0

Supplement: SUPPLEMENTAL_Matl.zip [file 44_CCT_RGDSK_KRPRDSNKK_60.pdf › SUPPLEMENTAL_Matl/rCLAMPS/STAMP/alignedLogos_NoyesGrps/logos_1/44_CCT_RGDSK_KRPRDSNKK_60.pdf]

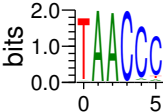

WebLogo 3.6.0

Supplement: SUPPLEMENTAL_Matl.zip [file 46_CCC_RLDSK_KRPRDSNKK_61.pdf › SUPPLEMENTAL_Matl/rCLAMPS/STAMP/alignedLogos_NoyesGrps/logos_1/46_CCC_RLDSK_KRPRDSNKK_61.pdf]

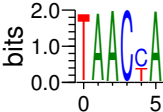

WebLogo 3.6.0

Supplement: SUPPLEMENTAL_Matl.zip [file 48_CCA_EHNAK_KRPRNANKK_62.pdf › SUPPLEMENTAL_Matl/rCLAMPS/STAMP/alignedLogos_NoyesGrps/logos_1/48_CCA_EHNAK_KRPRNANKK_62.pdf]

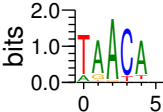

WebLogo 3.6.0

Supplement: SUPPLEMENTAL_Matl.zip [file 49_CAT_LSQSR_KRPRQSNRK_63.pdf › SUPPLEMENTAL_Matl/rCLAMPS/STAMP/alignedLogos_NoyesGrps/logos_1/49_CAT_LSQSR_KRPRQSNRK_63.pdf]

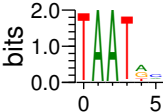

WebLogo 3.6.0

Supplement: SUPPLEMENTAL_Matl.zip [file 4_TTC_VRVSA_KRPRVSNAK_64.pdf › SUPPLEMENTAL_Matl/rCLAMPS/STAMP/alignedLogos_NoyesGrps/logos_1/4_TTC_VRVSA_KRPRVSNAK_64.pdf]

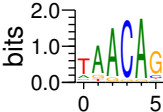

WebLogo 3.6.0

Supplement: SUPPLEMENTAL_Matl.zip [file 51_CAG_MSHWR_KRPRHWNRK_65.pdf › SUPPLEMENTAL_Matl/rCLAMPS/STAMP/alignedLogos_NoyesGrps/logos_1/51_CAG_MSHWR_KRPRHWNRK_65.pdf]

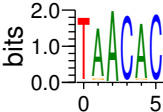

WebLogo 3.6.0

Supplement: SUPPLEMENTAL_Matl.zip [file 53_CAC_ERVSR_KRPRVSNRK_66.pdf › SUPPLEMENTAL_Matl/rCLAMPS/STAMP/alignedLogos_NoyesGrps/logos_1/53_CAC_ERVSR_KRPRVSNRK_66.pdf]

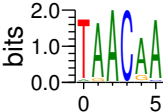

WebLogo 3.6.0

Supplement: SUPPLEMENTAL_Matl.zip [file 54_CAA_LMYQR_KRPRYQNRK_67.pdf › SUPPLEMENTAL_Matl/rCLAMPS/STAMP/alignedLogos_NoyesGrps/logos_1/54_CAA_LMYQR_KRPRYQNRK_67.pdf]

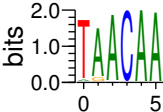

WebLogo 3.6.0

Supplement: SUPPLEMENTAL_Matl.zip [file 55_CAA_LHYVR_KRPRYVNRK_68.pdf › SUPPLEMENTAL_Matl/rCLAMPS/STAMP/alignedLogos_NoyesGrps/logos_1/55_CAA_LHYVR_KRPRYVNRK_68.pdf]

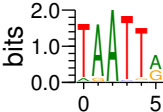

Supplement: SUPPLEMENTAL_Matl.zip [file 56_ATT_HRVQA_KRPRVQNAK_69.pdf › SUPPLEMENTAL_Matl/rCLAMPS/STAMP/alignedLogos_NoyesGrps/logos_1/56_ATT_HRVQA_KRPRVQNAK_69.pdf]

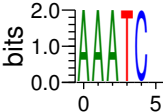

WebLogo 3.6.0

Supplement: SUPPLEMENTAL_Matl.zip [file 59_ATC_TRMAF_KRPRMANFK_70.pdf › SUPPLEMENTAL_Matl/rCLAMPS/STAMP/alignedLogos_NoyesGrps/logos_1/59_ATC_TRMAF_KRPRMANFK_70.pdf]

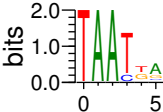

WebLogo 3.6.0

Supplement: SUPPLEMENTAL_Matl.zip [file 60_ATA_KTVQV_KRPRVQNVK_71.pdf › SUPPLEMENTAL_Matl/rCLAMPS/STAMP/alignedLogos_NoyesGrps/logos_1/60_ATA_KTVQV_KRPRVQNVK_71.pdf]

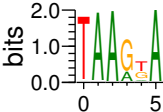

WebLogo 3.6.0

Supplement: SUPPLEMENTAL_Matl.zip [file 64_AGA_AFRAH_KRPRRANHK_72.pdf › SUPPLEMENTAL_Matl/rCLAMPS/STAMP/alignedLogos_NoyesGrps/logos_1/64_AGA_AFRAH_KRPRRANHK_72.pdf]

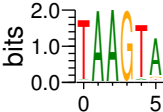

WebLogo 3.6.0

Supplement: SUPPLEMENTAL_Matl.zip [file 73_AAT_KLTAF_KRPRTANFK_73.pdf › SUPPLEMENTAL_Matl/rCLAMPS/STAMP/alignedLogos_NoyesGrps/logos_1/73_AAT_KLTAF_KRPRTANFK_73.pdf]

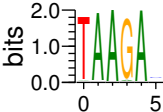

WebLogo 3.6.0

Supplement: SUPPLEMENTAL_Matl.zip [file 75_AAC_SISRF_KRPRSRNFK_74.pdf › SUPPLEMENTAL_Matl/rCLAMPS/STAMP/alignedLogos_NoyesGrps/logos_1/75_AAC_SISRF_KRPRSRNFK_74.pdf]

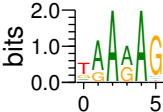

WebLogo 3.6.0

Supplement: SUPPLEMENTAL_Matl.zip [file 76_AAA_RAQWF_KRPRQWNFK_75.pdf › SUPPLEMENTAL_Matl/rCLAMPS/STAMP/alignedLogos_NoyesGrps/logos_1/76_AAA_RAQWF_KRPRQWNFK_75.pdf]

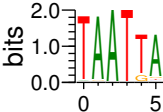

Supplement: SUPPLEMENTAL_Matl.zip [file 7_TTA_RVLRA_KRPRLRNAK_76.pdf › SUPPLEMENTAL_Matl/rCLAMPS/STAMP/alignedLogos_NoyesGrps/logos_1/7_TTA_RVLRA_KRPRLRNAK_76.pdf]

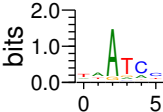

WebLogo 3.6.0

Supplement: SUPPLEMENTAL_Matl.zip [file AAEL012091_RNRTFKNAK_77.pdf › SUPPLEMENTAL_Matl/rCLAMPS/STAMP/alignedLogos_NoyesGrps/logos_1/AAEL012091_RNRTFKNAK_77.pdf]



WebLogo 3.6.0

Supplement: SUPPLEMENTAL_Matl.zip [file AAEL012091_TRMRYKNAA.pdf › SUPPLEMENTAL_Matl/rCLAMPS/STAMP/alignedLogos_NoyesGrps/logos_1/AAEL012091_TRMRYKNAA.pdf]

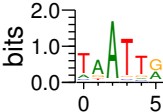

WebLogo 3.6.0

Supplement: SUPPLEMENTAL_Matl.zip [file AAZ08039_KKSRVQNAK.pdf › SUPPLEMENTAL_Matl/rCLAMPS/STAMP/alignedLogos_NoyesGrps/logos_1/AAZ08039_KKSRVQNAK.pdf]



WebLogo 3.6.0

Supplement: SUPPLEMENTAL_Matl.zip [file AAZ08039_KKSRVQNAK_78.pdf › SUPPLEMENTAL_Matl/rCLAMPS/STAMP/alignedLogos_NoyesGrps/logos_1/AAZ08039_KKSRVQNAK_78.pdf]

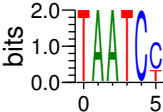

WebLogo 3.6.0

Supplement: SUPPLEMENTAL_Matl.zip [file AGAP006642_KRNRFKNAK.pdf › SUPPLEMENTAL_Matl/rCLAMPS/STAMP/alignedLogos_NoyesGrps/logos_1/AGAP006642_KRNRFKNAK.pdf]



WebLogo 3.6.0

Supplement: SUPPLEMENTAL_Matl.zip [file AGAP006642_RNRTFKNAK_79.pdf › SUPPLEMENTAL_Matl/rCLAMPS/STAMP/alignedLogos_NoyesGrps/logos_1/AGAP006642_RNRTFKNAK_79.pdf]

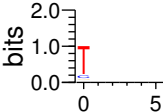

WebLogo 3.6.0

Supplement: SUPPLEMENTAL_Matl.zip [file AGAP009986_KRLFNANRK.pdf › SUPPLEMENTAL_Matl/rCLAMPS/STAMP/alignedLogos_NoyesGrps/logos_1/AGAP009986_KRLFNANRK.pdf]

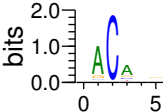

Supplement: SUPPLEMENTAL_Matl.zip [file AGAP009986_KRLFNANRK_80.pdf › SUPPLEMENTAL_Matl/rCLAMPS/STAMP/alignedLogos_NoyesGrps/logos_1/AGAP009986_KRLFNANRK_80.pdf]

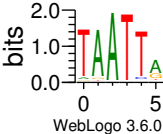

Supplement: SUPPLEMENTAL_Matl.zip [file ALX1_RRHRVQNAK.pdf › SUPPLEMENTAL_Matl/rCLAMPS/STAMP/alignedLogos_NoyesGrps/logos_1/ALX1_RRHRVQNAK.pdf]

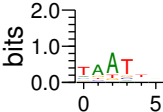

WebLogo 3.6.0

Supplement: SUPPLEMENTAL_Matl.zip [file ALX3_RRNRVQNAK.pdf › SUPPLEMENTAL_Matl/rCLAMPS/STAMP/alignedLogos_NoyesGrps/logos_1/ALX3_RRNRVQNAK.pdf]

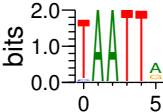

WebLogo 3.6.0

Supplement: SUPPLEMENTAL_Matl.zip [file ALX3_RRNRVQNAK_81.pdf › SUPPLEMENTAL_Matl/rCLAMPS/STAMP/alignedLogos_NoyesGrps/logos_1/ALX3_RRNRVQNAK_81.pdf]

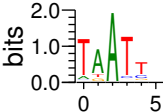

WebLogo 3.6.0

Supplement: SUPPLEMENTAL_Matl.zip [file ALX4_RRNRVQNAK.pdf › SUPPLEMENTAL_Matl/rCLAMPS/STAMP/alignedLogos_NoyesGrps/logos_1/ALX4_RRNRVQNAK.pdf]

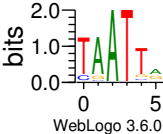

Supplement: SUPPLEMENTAL_Matl.zip [file ALX4_RRNRVQNAK_82.pdf › SUPPLEMENTAL_Matl/rCLAMPS/STAMP/alignedLogos_NoyesGrps/logos_1/ALX4_RRNRVQNAK_82.pdf]

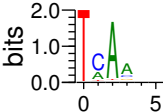

WebLogo 3.6.0

Supplement: SUPPLEMENTAL_Matl.zip [file ANHX_GLKSNANRR_83.pdf › SUPPLEMENTAL_Matl/rCLAMPS/STAMP/alignedLogos_NoyesGrps/logos_1/ANHX_GLKSNANRR_83.pdf]

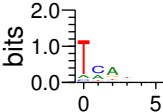

WebLogo 3.6.0

Supplement: SUPPLEMENTAL_Matl.zip [file ANIA_00885_RKSSNANRR.pdf › SUPPLEMENTAL_Matl/rCLAMPS/STAMP/alignedLogos_NoyesGrps/logos_1/ANIA_00885_RKSSNANRR.pdf]



Supplement: SUPPLEMENTAL_Matl.zip [file ANIA_00885_RKSSNANRR_84.pdf › SUPPLEMENTAL_Matl/rCLAMPS/STAMP/alignedLogos_NoyesGrps/logos_1/ANIA_00885_RKSSNANRR_84.pdf]

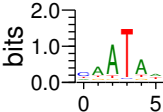

WebLogo 3.6.0

Supplement: SUPPLEMENTAL_Matl.zip [file ANIA_01217_NLSRNQNAK_85.pdf › SUPPLEMENTAL_Matl/rCLAMPS/STAMP/alignedLogos_NoyesGrps/logos_1/ANIA_01217_NLSRNQNAK_85.pdf]

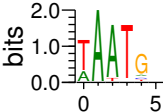

WebLogo 3.6.0

Supplement: SUPPLEMENTAL_Matl.zip [file ANL2_KKRYFQNTQ.pdf › SUPPLEMENTAL_Matl/rCLAMPS/STAMP/alignedLogos_NoyesGrps/logos_1/ANL2_KKRYFQNTQ.pdf]



WebLogo 3.6.0

Supplement: SUPPLEMENTAL_Matl.zip [file ANL2_KKRYFQNTQ_86.pdf › SUPPLEMENTAL_Matl/rCLAMPS/STAMP/alignedLogos_NoyesGrps/logos_1/ANL2_KKRYFQNTQ_86.pdf]

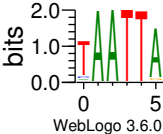

Supplement: SUPPLEMENTAL_Matl.zip [file ARGFX_HKERVRNFK.pdf › SUPPLEMENTAL_Matl/rCLAMPS/STAMP/alignedLogos_NoyesGrps/logos_1/ARGFX_HKERVRNFK.pdf]

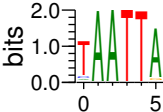

WebLogo 3.6.0

Supplement: SUPPLEMENTAL_Matl.zip [file ARGFX_HKERVRNFK_87.pdf › SUPPLEMENTAL_Matl/rCLAMPS/STAMP/alignedLogos_NoyesGrps/logos_1/ARGFX_HKERVRNFK_87.pdf]

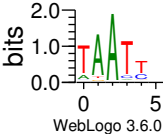

Supplement: SUPPLEMENTAL_Matl.zip [file ARX_RRYRVQNAK.pdf › SUPPLEMENTAL_Matl/rCLAMPS/STAMP/alignedLogos_NoyesGrps/logos_1/ARX_RRYRVQNAK.pdf]

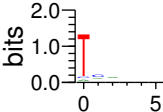

WebLogo 3.6.0

Supplement: SUPPLEMENTAL_Matl.zip [file ATEG_00670_KTYQNSNRR.pdf › SUPPLEMENTAL_Matl/rCLAMPS/STAMP/alignedLogos_NoyesGrps/logos_1/ATEG_00670_KTYQNSNRR.pdf]
