# Supplementary figures and images for: Learning probabilistic protein–DNA recognition codes from DNA-binding specificities using structural mappings (part 12 of 25)
Source: HighWire-hosted journal article supplement (doi:10.1101/gr.276606.122), 2022-09-01

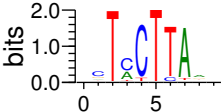

Supplement: SUPPLEMENTAL_Matl.zip [file 262_AGA_QFRAW_33.pdf › SUPPLEMENTAL_Matl/rCLAMPS/hd1-explore/testSetLogos/262_AGA_QFRAW_33.pdf]

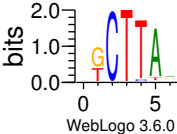

Supplement: SUPPLEMENTAL_Matl.zip [file 265_ACG_WYSKY_34.pdf › SUPPLEMENTAL_Matl/rCLAMPS/hd1-explore/testSetLogos/265_ACG_WYSKY_34.pdf]

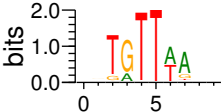

WebLogo 3.6.0

Supplement: SUPPLEMENTAL_Matl.zip [file 266_ACC_KACHS_35.pdf › SUPPLEMENTAL_Matl/rCLAMPS/hd1-explore/testSetLogos/266_ACC_KACHS_35.pdf]

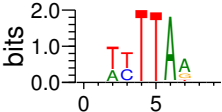

WebLogo 3.6.0

Supplement: SUPPLEMENTAL_Matl.zip [file 269_AAT_KVTNF_36.pdf › SUPPLEMENTAL_Matl/rCLAMPS/hd1-explore/testSetLogos/269_AAT_KVTNF_36.pdf]

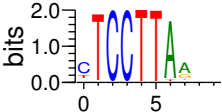

WebLogo 3.6.0

Supplement: SUPPLEMENTAL_Matl.zip [file 27_GGT_LTKDQ_37.pdf › SUPPLEMENTAL_Matl/rCLAMPS/hd1-explore/testSetLogos/27_GGT_LTKDQ_37.pdf]

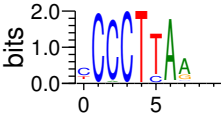

WebLogo 3.6.0

Supplement: SUPPLEMENTAL_Matl.zip [file 28_GGG_RSKER_38.pdf › SUPPLEMENTAL_Matl/rCLAMPS/hd1-explore/testSetLogos/28_GGG_RSKER_38.pdf]

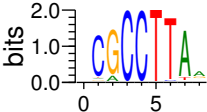

WebLogo 3.6.0

Supplement: SUPPLEMENTAL_Matl.zip [file 29_GGC_TLKNQ_39.pdf › SUPPLEMENTAL_Matl/rCLAMPS/hd1-explore/testSetLogos/29_GGC_TLKNQ_39.pdf]

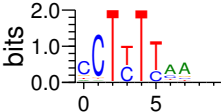

WebLogo 3.6.0

Supplement: SUPPLEMENTAL_Matl.zip [file 301_AAG_RSQWH_40.pdf › SUPPLEMENTAL_Matl/rCLAMPS/hd1-explore/testSetLogos/301_AAG_RSQWH_40.pdf]

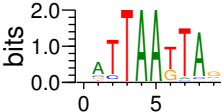

WebLogo 3.6.0

Supplement: SUPPLEMENTAL_Matl.zip [file 302_ATA_LRWNS_41.pdf › SUPPLEMENTAL_Matl/rCLAMPS/hd1-explore/testSetLogos/302_ATA_LRWNS_41.pdf]

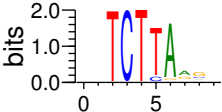

WebLogo 3.6.0

Supplement: SUPPLEMENTAL_Matl.zip [file 305_GAT_VGRLY_42.pdf › SUPPLEMENTAL_Matl/rCLAMPS/hd1-explore/testSetLogos/305_GAT_VGRLY_42.pdf]

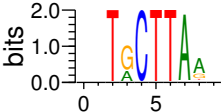

WebLogo 3.6.0

Supplement: SUPPLEMENTAL_Matl.zip [file 306_GCA_RHDRA_43.pdf › SUPPLEMENTAL_Matl/rCLAMPS/hd1-explore/testSetLogos/306_GCA_RHDRA_43.pdf]

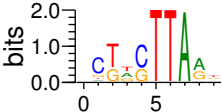

WebLogo 3.6.0

Supplement: SUPPLEMENTAL_Matl.zip [file 307_GCA_RYDRA_44.pdf › SUPPLEMENTAL_Matl/rCLAMPS/hd1-explore/testSetLogos/307_GCA_RYDRA_44.pdf]

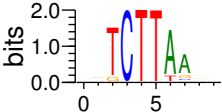

WebLogo 3.6.0

Supplement: SUPPLEMENTAL_Matl.zip [file 309_GCG_RLDRY_45.pdf › SUPPLEMENTAL_Matl/rCLAMPS/hd1-explore/testSetLogos/309_GCG_RLDRY_45.pdf]

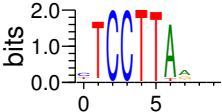

WebLogo 3.6.0

Supplement: SUPPLEMENTAL_Matl.zip [file 30_GGA_LAKDQ_46.pdf › SUPPLEMENTAL_Matl/rCLAMPS/hd1-explore/testSetLogos/30_GGA_LAKDQ_46.pdf]

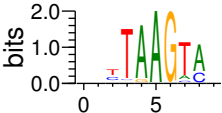

WebLogo 3.6.0

Supplement: SUPPLEMENTAL_Matl.zip [file 311_GTC_YRRGF_47.pdf › SUPPLEMENTAL_Matl/rCLAMPS/hd1-explore/testSetLogos/311_GTC_YRRGF_47.pdf]

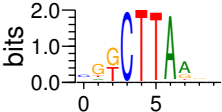

WebLogo 3.6.0

Supplement: SUPPLEMENTAL_Matl.zip [file 31_GCT_KITKF_48.pdf › SUPPLEMENTAL_Matl/rCLAMPS/hd1-explore/testSetLogos/31_GCT_KITKF_48.pdf]

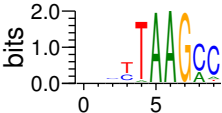

Supplement: SUPPLEMENTAL_Matl.zip [file 32_GCC_VRLKY_49.pdf › SUPPLEMENTAL_Matl/rCLAMPS/hd1-explore/testSetLogos/32_GCC_VRLKY_49.pdf]

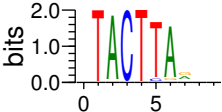

WebLogo 3.6.0

Supplement: SUPPLEMENTAL_Matl.zip [file 33_GCA_ALRQQ_50.pdf › SUPPLEMENTAL_Matl/rCLAMPS/hd1-explore/testSetLogos/33_GCA_ALRQQ_50.pdf]

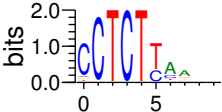

WebLogo 3.6.0

Supplement: SUPPLEMENTAL_Matl.zip [file 35_GAG_VMRWY_51.pdf › SUPPLEMENTAL_Matl/rCLAMPS/hd1-explore/testSetLogos/35_GAG_VMRWY_51.pdf]

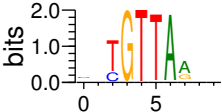

WebLogo 3.6.0

Supplement: SUPPLEMENTAL_Matl.zip [file 41_CGC_RVMSR_52.pdf › SUPPLEMENTAL_Matl/rCLAMPS/hd1-explore/testSetLogos/41_CGC_RVMSR_52.pdf]

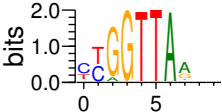

WebLogo 3.6.0

Supplement: SUPPLEMENTAL_Matl.zip [file 45_CCG_RCYEK_53.pdf › SUPPLEMENTAL_Matl/rCLAMPS/hd1-explore/testSetLogos/45_CCG_RCYEK_53.pdf]

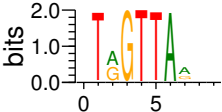

WebLogo 3.6.0

Supplement: SUPPLEMENTAL_Matl.zip [file 47_CCA_KMTQK_54.pdf › SUPPLEMENTAL_Matl/rCLAMPS/hd1-explore/testSetLogos/47_CCA_KMTQK_54.pdf]

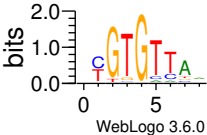

Supplement: SUPPLEMENTAL_Matl.zip [file 52_CAC_LGMRR_55.pdf › SUPPLEMENTAL_Matl/rCLAMPS/hd1-explore/testSetLogos/52_CAC_LGMRR_55.pdf]

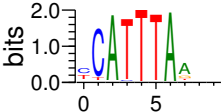

WebLogo 3.6.0

Supplement: SUPPLEMENTAL_Matl.zip [file 57_ATG_LTYQW_56.pdf › SUPPLEMENTAL_Matl/rCLAMPS/hd1-explore/testSetLogos/57_ATG_LTYQW_56.pdf]

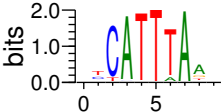

WebLogo 3.6.0

Supplement: SUPPLEMENTAL_Matl.zip [file 58_ATG_RVYQW_57.pdf › SUPPLEMENTAL_Matl/rCLAMPS/hd1-explore/testSetLogos/58_ATG_RVYQW_57.pdf]

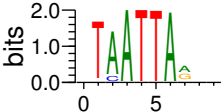

WebLogo 3.6.0

Supplement: SUPPLEMENTAL_Matl.zip [file 5_TTC_TRVAA_58.pdf › SUPPLEMENTAL_Matl/rCLAMPS/hd1-explore/testSetLogos/5_TTC_TRVAA_58.pdf]

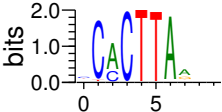

WebLogo 3.6.0

Supplement: SUPPLEMENTAL_Matl.zip [file 61_AGT_KGKEW_59.pdf › SUPPLEMENTAL_Matl/rCLAMPS/hd1-explore/testSetLogos/61_AGT_KGKEW_59.pdf]

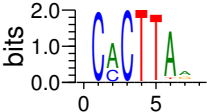

Supplement: SUPPLEMENTAL_Matl.zip [file 62_AGG_SHKEY_60.pdf › SUPPLEMENTAL_Matl/rCLAMPS/hd1-explore/testSetLogos/62_AGG_SHKEY_60.pdf]

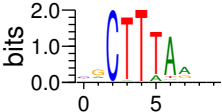

Supplement: SUPPLEMENTAL_Matl.zip [file 63_AGC_QSRNV_61.pdf › SUPPLEMENTAL_Matl/rCLAMPS/hd1-explore/testSetLogos/63_AGC_QSRNV_61.pdf]

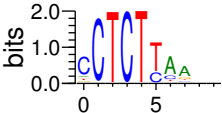

WebLogo 3.6.0

Supplement: SUPPLEMENTAL_Matl.zip [file 65_AGA_GSRWY_62.pdf › SUPPLEMENTAL_Matl/rCLAMPS/hd1-explore/testSetLogos/65_AGA_GSRWY_62.pdf]

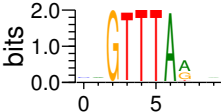

WebLogo 3.6.0

Supplement: SUPPLEMENTAL_Matl.zip [file 66_ACT_KTSHM_63.pdf › SUPPLEMENTAL_Matl/rCLAMPS/hd1-explore/testSetLogos/66_ACT_KTSHM_63.pdf]

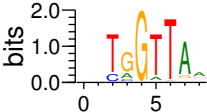

WebLogo 3.6.0

Supplement: SUPPLEMENTAL_Matl.zip [file 67_ACT_MKYEK_64.pdf › SUPPLEMENTAL_Matl/rCLAMPS/hd1-explore/testSetLogos/67_ACT_MKYEK_64.pdf]

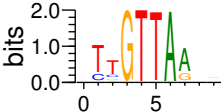

WebLogo 3.6.0

Supplement: SUPPLEMENTAL_Matl.zip [file 69_ACG_VKYER_65.pdf › SUPPLEMENTAL_Matl/rCLAMPS/hd1-explore/testSetLogos/69_ACG_VKYER_65.pdf]

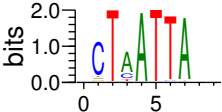

Supplement: SUPPLEMENTAL_Matl.zip [file 6_TTA_VRVAA_66.pdf › SUPPLEMENTAL_Matl/rCLAMPS/hd1-explore/testSetLogos/6_TTA_VRVAA_66.pdf]

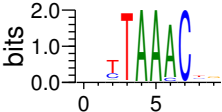

WebLogo 3.6.0

Supplement: SUPPLEMENTAL_Matl.zip [file 70_ACC_KTSHM_67.pdf › SUPPLEMENTAL_Matl/rCLAMPS/hd1-explore/testSetLogos/70_ACC_KTSHM_67.pdf]

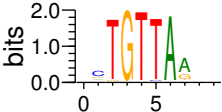

Supplement: SUPPLEMENTAL_Matl.zip [file 71_ACA_MTNNR_68.pdf › SUPPLEMENTAL_Matl/rCLAMPS/hd1-explore/testSetLogos/71_ACA_MTNNR_68.pdf]

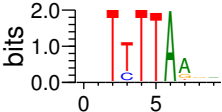

WebLogo 3.6.0

Supplement: SUPPLEMENTAL_Matl.zip [file 72_AAT_KMSNF_69.pdf › SUPPLEMENTAL_Matl/rCLAMPS/hd1-explore/testSetLogos/72_AAT_KMSNF_69.pdf]

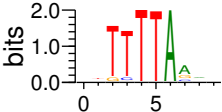

WebLogo 3.6.0

Supplement: SUPPLEMENTAL_Matl.zip [file 74_AAG_STSAH_70.pdf › SUPPLEMENTAL_Matl/rCLAMPS/hd1-explore/testSetLogos/74_AAG_STSAH_70.pdf]

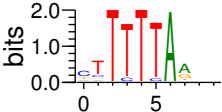

WebLogo 3.6.0

Supplement: SUPPLEMENTAL_Matl.zip [file 77_AAA_KEYVH_71.pdf › SUPPLEMENTAL_Matl/rCLAMPS/hd1-explore/testSetLogos/77_AAA_KEYVH_71.pdf]

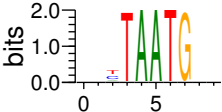

WebLogo 3.6.0

Supplement: SUPPLEMENTAL_Matl.zip [file 8_TGT_RVVSQ_72.pdf › SUPPLEMENTAL_Matl/rCLAMPS/hd1-explore/testSetLogos/8_TGT_RVVSQ_72.pdf]

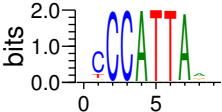

Supplement: SUPPLEMENTAL_Matl.zip [file 9_TGG_KTTQD_73.pdf › SUPPLEMENTAL_Matl/rCLAMPS/hd1-explore/testSetLogos/9_TGG_KTTQD_73.pdf]

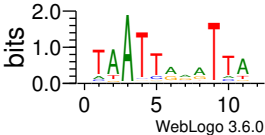

Supplement: SUPPLEMENTAL_Matl.zip [file ALX1_74.pdf › SUPPLEMENTAL_Matl/rCLAMPS/hd1-explore/testSetLogos/ALX1_74.pdf]

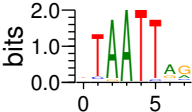

WebLogo 3.6.0

Supplement: SUPPLEMENTAL_Matl.zip [file ARX_75.pdf › SUPPLEMENTAL_Matl/rCLAMPS/hd1-explore/testSetLogos/ARX_75.pdf]

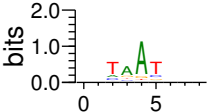

WebLogo 3.6.0

Supplement: SUPPLEMENTAL_Matl.zip [file ARX_P353L_76.pdf › SUPPLEMENTAL_Matl/rCLAMPS/hd1-explore/testSetLogos/ARX_P353L_76.pdf]

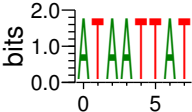

WebLogo 3.6.0

Supplement: SUPPLEMENTAL_Matl.zip [file ARX_P353R_77.pdf › SUPPLEMENTAL_Matl/rCLAMPS/hd1-explore/testSetLogos/ARX_P353R_77.pdf]

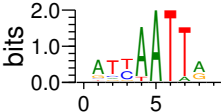

WebLogo 3.6.0

Supplement: SUPPLEMENTAL_Matl.zip [file ARX_R332H_78.pdf › SUPPLEMENTAL_Matl/rCLAMPS/hd1-explore/testSetLogos/ARX_R332H_78.pdf]

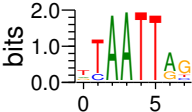

WebLogo 3.6.0

Supplement: SUPPLEMENTAL_Matl.zip [file ARX_T333N_79.pdf › SUPPLEMENTAL_Matl/rCLAMPS/hd1-explore/testSetLogos/ARX_T333N_79.pdf]

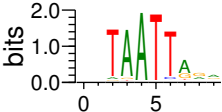

Supplement: SUPPLEMENTAL_Matl.zip [file Alx1_80.pdf › SUPPLEMENTAL_Matl/rCLAMPS/hd1-explore/testSetLogos/Alx1_80.pdf]

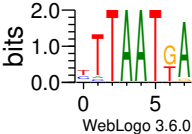

Supplement: SUPPLEMENTAL_Matl.zip [file Antp_81.pdf › SUPPLEMENTAL_Matl/rCLAMPS/hd1-explore/testSetLogos/Antp_81.pdf]

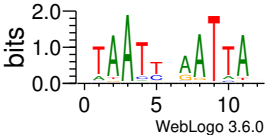

Supplement: SUPPLEMENTAL_Matl.zip [file Arx_82.pdf › SUPPLEMENTAL_Matl/rCLAMPS/hd1-explore/testSetLogos/Arx_82.pdf]

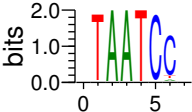

WebLogo 3.6.0

Supplement: SUPPLEMENTAL_Matl.zip [file CBG01820_83.pdf › SUPPLEMENTAL_Matl/rCLAMPS/hd1-explore/testSetLogos/CBG01820_83.pdf]

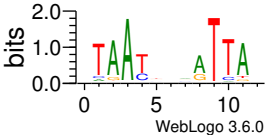

Supplement: SUPPLEMENTAL_Matl.zip [file CG32532_84.pdf › SUPPLEMENTAL_Matl/rCLAMPS/hd1-explore/testSetLogos/CG32532_84.pdf]

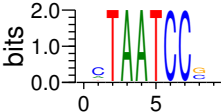

WebLogo 3.6.0

Supplement: SUPPLEMENTAL_Matl.zip [file CRX_85.pdf › SUPPLEMENTAL_Matl/rCLAMPS/hd1-explore/testSetLogos/CRX_85.pdf]

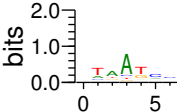

WebLogo 3.6.0

Supplement: SUPPLEMENTAL_Matl.zip [file CRX_E80A_86.pdf › SUPPLEMENTAL_Matl/rCLAMPS/hd1-explore/testSetLogos/CRX_E80A_86.pdf]

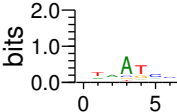

WebLogo 3.6.0

Supplement: SUPPLEMENTAL_Matl.zip [file CRX_R41Q_87.pdf › SUPPLEMENTAL_Matl/rCLAMPS/hd1-explore/testSetLogos/CRX_R41Q_87.pdf]

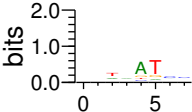

WebLogo 3.6.0

Supplement: SUPPLEMENTAL_Matl.zip [file CRX_R41W_88.pdf › SUPPLEMENTAL_Matl/rCLAMPS/hd1-explore/testSetLogos/CRX_R41W_88.pdf]

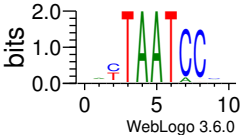

Supplement: SUPPLEMENTAL_Matl.zip [file CRX_R90W_89.pdf › SUPPLEMENTAL_Matl/rCLAMPS/hd1-explore/testSetLogos/CRX_R90W_89.pdf]

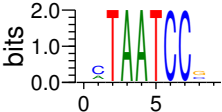

WebLogo 3.6.0

Supplement: SUPPLEMENTAL_Matl.zip [file CRX_V66I_90.pdf › SUPPLEMENTAL_Matl/rCLAMPS/hd1-explore/testSetLogos/CRX_V66I_90.pdf]

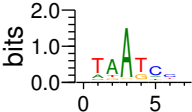

WebLogo 3.6.0

Supplement: SUPPLEMENTAL_Matl.zip [file Crx_91.pdf › SUPPLEMENTAL_Matl/rCLAMPS/hd1-explore/testSetLogos/Crx_91.pdf]

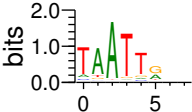

WebLogo 3.6.0

Supplement: SUPPLEMENTAL_Matl.zip [file Dr_92.pdf › SUPPLEMENTAL_Matl/rCLAMPS/hd1-explore/testSetLogos/Dr_92.pdf]

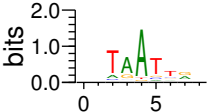

WebLogo 3.6.0

Supplement: SUPPLEMENTAL_Matl.zip [file ESX1_K193R_93.pdf › SUPPLEMENTAL_Matl/rCLAMPS/hd1-explore/testSetLogos/ESX1_K193R_93.pdf]

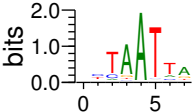

Supplement: SUPPLEMENTAL_Matl.zip [file Esx1_94.pdf › SUPPLEMENTAL_Matl/rCLAMPS/hd1-explore/testSetLogos/Esx1_94.pdf]

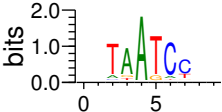

Supplement: SUPPLEMENTAL_Matl.zip [file HBX4_ECHGR_95.pdf › SUPPLEMENTAL_Matl/rCLAMPS/hd1-explore/testSetLogos/HBX4_ECHGR_95.pdf]

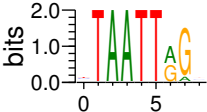

WebLogo 3.6.0

Supplement: SUPPLEMENTAL_Matl.zip [file HESX1_96.pdf › SUPPLEMENTAL_Matl/rCLAMPS/hd1-explore/testSetLogos/HESX1_96.pdf]

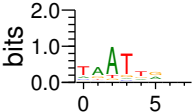

WebLogo 3.6.0

Supplement: SUPPLEMENTAL_Matl.zip [file HESX1_E149K_97.pdf › SUPPLEMENTAL_Matl/rCLAMPS/hd1-explore/testSetLogos/HESX1_E149K_97.pdf]

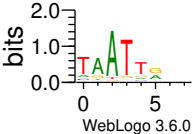

Supplement: SUPPLEMENTAL_Matl.zip [file HESX1_N125S_98.pdf › SUPPLEMENTAL_Matl/rCLAMPS/hd1-explore/testSetLogos/HESX1_N125S_98.pdf]

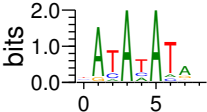

WebLogo 3.6.0

Supplement: SUPPLEMENTAL_Matl.zip [file HESX1_R160C_99.pdf › SUPPLEMENTAL_Matl/rCLAMPS/hd1-explore/testSetLogos/HESX1_R160C_99.pdf]

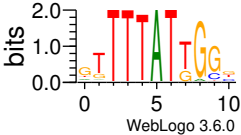

Supplement: SUPPLEMENTAL_Matl.zip [file HOXA13_100.pdf › SUPPLEMENTAL_Matl/rCLAMPS/hd1-explore/testSetLogos/HOXA13_100.pdf]

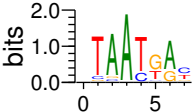

WebLogo 3.6.0

Supplement: SUPPLEMENTAL_Matl.zip [file HOXA4_101.pdf › SUPPLEMENTAL_Matl/rCLAMPS/hd1-explore/testSetLogos/HOXA4_101.pdf]

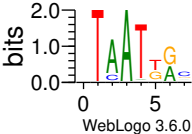

Supplement: SUPPLEMENTAL_Matl.zip [file HOXA7_102.pdf › SUPPLEMENTAL_Matl/rCLAMPS/hd1-explore/testSetLogos/HOXA7_102.pdf]

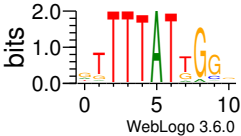

Supplement: SUPPLEMENTAL_Matl.zip [file HOXB13_103.pdf › SUPPLEMENTAL_Matl/rCLAMPS/hd1-explore/testSetLogos/HOXB13_103.pdf]

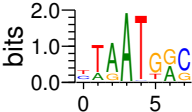

WebLogo 3.6.0

Supplement: SUPPLEMENTAL_Matl.zip [file HOXB4_104.pdf › SUPPLEMENTAL_Matl/rCLAMPS/hd1-explore/testSetLogos/HOXB4_104.pdf]

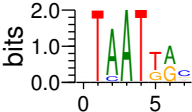

WebLogo 3.6.0

Supplement: SUPPLEMENTAL_Matl.zip [file HOXB7_105.pdf › SUPPLEMENTAL_Matl/rCLAMPS/hd1-explore/testSetLogos/HOXB7_105.pdf]

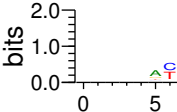

WebLogo 3.6.0

Supplement: SUPPLEMENTAL_Matl.zip [file HOXB7_K191R_106.pdf › SUPPLEMENTAL_Matl/rCLAMPS/hd1-explore/testSetLogos/HOXB7_K191R_106.pdf]

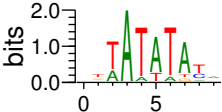

WebLogo 3.6.0

Supplement: SUPPLEMENTAL_Matl.zip [file HOXB7_M190L_107.pdf › SUPPLEMENTAL_Matl/rCLAMPS/hd1-explore/testSetLogos/HOXB7_M190L_107.pdf]

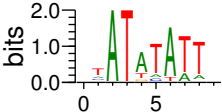

WebLogo 3.6.0

Supplement: SUPPLEMENTAL_Matl.zip [file HOXB7_R189C_108.pdf › SUPPLEMENTAL_Matl/rCLAMPS/hd1-explore/testSetLogos/HOXB7_R189C_108.pdf]

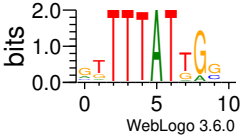

Supplement: SUPPLEMENTAL_Matl.zip [file HOXC13_109.pdf › SUPPLEMENTAL_Matl/rCLAMPS/hd1-explore/testSetLogos/HOXC13_109.pdf]

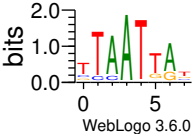

Supplement: SUPPLEMENTAL_Matl.zip [file HOXC4_110.pdf › SUPPLEMENTAL_Matl/rCLAMPS/hd1-explore/testSetLogos/HOXC4_110.pdf]

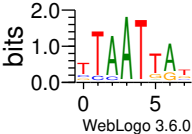

Supplement: SUPPLEMENTAL_Matl.zip [file HOXC4_N178S_111.pdf › SUPPLEMENTAL_Matl/rCLAMPS/hd1-explore/testSetLogos/HOXC4_N178S_111.pdf]

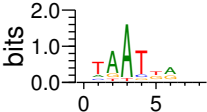

WebLogo 3.6.0

Supplement: SUPPLEMENTAL_Matl.zip [file HOXC4_R158L_112.pdf › SUPPLEMENTAL_Matl/rCLAMPS/hd1-explore/testSetLogos/HOXC4_R158L_112.pdf]

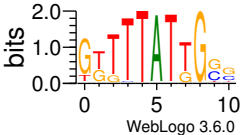

Supplement: SUPPLEMENTAL_Matl.zip [file HOXD13_113.pdf › SUPPLEMENTAL_Matl/rCLAMPS/hd1-explore/testSetLogos/HOXD13_113.pdf]

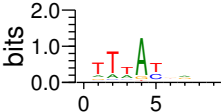

WebLogo 3.6.0

Supplement: SUPPLEMENTAL_Matl.zip [file HOXD13_I297V_114.pdf › SUPPLEMENTAL_Matl/rCLAMPS/hd1-explore/testSetLogos/HOXD13_I297V_114.pdf]

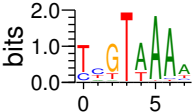

WebLogo 3.6.0

Supplement: SUPPLEMENTAL_Matl.zip [file HOXD13_I322L_115.pdf › SUPPLEMENTAL_Matl/rCLAMPS/hd1-explore/testSetLogos/HOXD13_I322L_115.pdf]

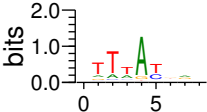

WebLogo 3.6.0

Supplement: SUPPLEMENTAL_Matl.zip [file HOXD13_N298S_116.pdf › SUPPLEMENTAL_Matl/rCLAMPS/hd1-explore/testSetLogos/HOXD13_N298S_116.pdf]

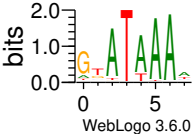

Supplement: SUPPLEMENTAL_Matl.zip [file HOXD13_Q325K_117.pdf › SUPPLEMENTAL_Matl/rCLAMPS/hd1-explore/testSetLogos/HOXD13_Q325K_117.pdf]

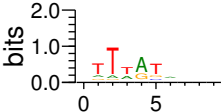

WebLogo 3.6.0

Supplement: SUPPLEMENTAL_Matl.zip [file HOXD13_Q325R_118.pdf › SUPPLEMENTAL_Matl/rCLAMPS/hd1-explore/testSetLogos/HOXD13_Q325R_118.pdf]

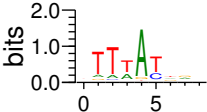

Supplement: SUPPLEMENTAL_Matl.zip [file HOXD13_R306W_119.pdf › SUPPLEMENTAL_Matl/rCLAMPS/hd1-explore/testSetLogos/HOXD13_R306W_119.pdf]

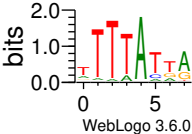

Supplement: SUPPLEMENTAL_Matl.zip [file HOXD13_S316C_120.pdf › SUPPLEMENTAL_Matl/rCLAMPS/hd1-explore/testSetLogos/HOXD13_S316C_120.pdf]

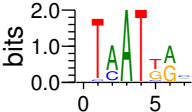

WebLogo 3.6.0

Supplement: SUPPLEMENTAL_Matl.zip [file HOXD4_121.pdf › SUPPLEMENTAL_Matl/rCLAMPS/hd1-explore/testSetLogos/HOXD4_121.pdf]

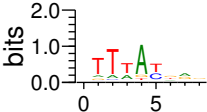

WebLogo 3.6.0

Supplement: SUPPLEMENTAL_Matl.zip [file Hoxa13_122.pdf › SUPPLEMENTAL_Matl/rCLAMPS/hd1-explore/testSetLogos/Hoxa13_122.pdf]

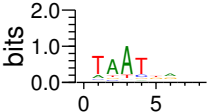

Supplement: SUPPLEMENTAL_Matl.zip [file Hoxa4_123.pdf › SUPPLEMENTAL_Matl/rCLAMPS/hd1-explore/testSetLogos/Hoxa4_123.pdf]

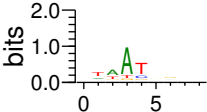

WebLogo 3.6.0

Supplement: SUPPLEMENTAL_Matl.zip [file Hoxa7_124.pdf › SUPPLEMENTAL_Matl/rCLAMPS/hd1-explore/testSetLogos/Hoxa7_124.pdf]

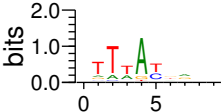

Supplement: SUPPLEMENTAL_Matl.zip [file Hoxb13_125.pdf › SUPPLEMENTAL_Matl/rCLAMPS/hd1-explore/testSetLogos/Hoxb13_125.pdf]

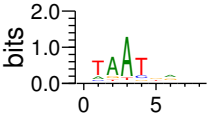

WebLogo 3.6.0

Supplement: SUPPLEMENTAL_Matl.zip [file Hoxb4_126.pdf › SUPPLEMENTAL_Matl/rCLAMPS/hd1-explore/testSetLogos/Hoxb4_126.pdf]

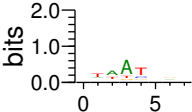

# WebLogo 3.6.0

Supplement: SUPPLEMENTAL_Matl.zip [file Hoxb7_127.pdf › SUPPLEMENTAL_Matl/rCLAMPS/hd1-explore/testSetLogos/Hoxb7_127.pdf]

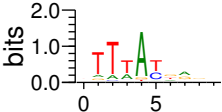

WebLogo 3.6.0

Supplement: SUPPLEMENTAL_Matl.zip [file Hoxc13_128.pdf › SUPPLEMENTAL_Matl/rCLAMPS/hd1-explore/testSetLogos/Hoxc13_128.pdf]

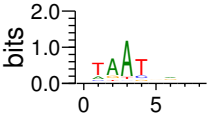

WebLogo 3.6.0

Supplement: SUPPLEMENTAL_Matl.zip [file Hoxc4_129.pdf › SUPPLEMENTAL_Matl/rCLAMPS/hd1-explore/testSetLogos/Hoxc4_129.pdf]

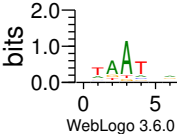

Supplement: SUPPLEMENTAL_Matl.zip [file Hoxc5_130.pdf › SUPPLEMENTAL_Matl/rCLAMPS/hd1-explore/testSetLogos/Hoxc5_130.pdf]

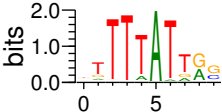

Supplement: SUPPLEMENTAL_Matl.zip [file Hoxd13_131.pdf › SUPPLEMENTAL_Matl/rCLAMPS/hd1-explore/testSetLogos/Hoxd13_131.pdf]

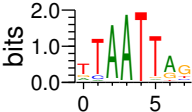

WebLogo 3.6.0

Supplement: SUPPLEMENTAL_Matl.zip [file ISX_R83Q_132.pdf › SUPPLEMENTAL_Matl/rCLAMPS/hd1-explore/testSetLogos/ISX_R83Q_132.pdf]
