# Supplementary figures and images for: Learning probabilistic protein–DNA recognition codes from DNA-binding specificities using structural mappings (part 2 of 25)
Source: HighWire-hosted journal article supplement (doi:10.1101/gr.276606.122), 2022-09-01

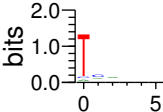

WebLogo 3.6.0

Supplement: SUPPLEMENTAL_Matl.zip [file ATEG_00670_YQRLNSNRR_88.pdf › SUPPLEMENTAL_Matl/rCLAMPS/STAMP/alignedLogos_NoyesGrps/logos_1/ATEG_00670_YQRLNSNRR_88.pdf]

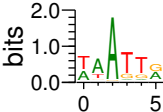

WebLogo 3.6.0

Supplement: SUPPLEMENTAL_Matl.zip [file ATEG_04171_RQKRIQNQN.pdf › SUPPLEMENTAL_Matl/rCLAMPS/STAMP/alignedLogos_NoyesGrps/logos_1/ATEG_04171_RQKRIQNQN.pdf]



WebLogo 3.6.0

Supplement: SUPPLEMENTAL_Matl.zip [file ATEG_04171_RQKRIQNQN_89.pdf › SUPPLEMENTAL_Matl/rCLAMPS/STAMP/alignedLogos_NoyesGrps/logos_1/ATEG_04171_RQKRIQNQN_89.pdf]

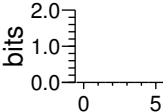

WebLogo 3.6.0

Supplement: SUPPLEMENTAL_Matl.zip [file ATHB-12_SNNQIQNAR.pdf › SUPPLEMENTAL_Matl/rCLAMPS/STAMP/alignedLogos_NoyesGrps/logos_1/ATHB-12_SNNQIQNAR.pdf]



WebLogo 3.6.0

Supplement: SUPPLEMENTAL_Matl.zip [file ATHB-12_SNNQIQNAR_90.pdf › SUPPLEMENTAL_Matl/rCLAMPS/STAMP/alignedLogos_NoyesGrps/logos_1/ATHB-12_SNNQIQNAR_90.pdf]

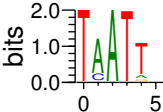

WebLogo 3.6.0

Supplement: SUPPLEMENTAL_Matl.zip [file ATHB-13_GEKKIQNAR_91.pdf › SUPPLEMENTAL_Matl/rCLAMPS/STAMP/alignedLogos_NoyesGrps/logos_1/ATHB-13_GEKKIQNAR_91.pdf]

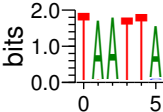

WebLogo 3.6.0

Supplement: SUPPLEMENTAL_Matl.zip [file ATHB-15_NGKYVQNCR_92.pdf › SUPPLEMENTAL_Matl/rCLAMPS/STAMP/alignedLogos_NoyesGrps/logos_1/ATHB-15_NGKYVQNCR_92.pdf]

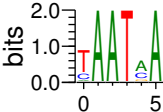

WebLogo 3.6.0

Supplement: SUPPLEMENTAL_Matl.zip [file ATHB-16_SEKKVQNAR.pdf › SUPPLEMENTAL_Matl/rCLAMPS/STAMP/alignedLogos_NoyesGrps/logos_1/ATHB-16_SEKKVQNAR.pdf]



WebLogo 3.6.0

Supplement: SUPPLEMENTAL_Matl.zip [file ATHB-16_SEKKVQNAR_93.pdf › SUPPLEMENTAL_Matl/rCLAMPS/STAMP/alignedLogos_NoyesGrps/logos_1/ATHB-16_SEKKVQNAR_93.pdf]

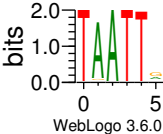

Supplement: SUPPLEMENTAL_Matl.zip [file ATHB-20_GEKKIQNAR_94.pdf › SUPPLEMENTAL_Matl/rCLAMPS/STAMP/alignedLogos_NoyesGrps/logos_1/ATHB-20_GEKKIQNAR_94.pdf]

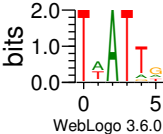

Supplement: SUPPLEMENTAL_Matl.zip [file ATHB-21_WFRKVQNAR_95.pdf › SUPPLEMENTAL_Matl/rCLAMPS/STAMP/alignedLogos_NoyesGrps/logos_1/ATHB-21_WFRKVQNAR_95.pdf]

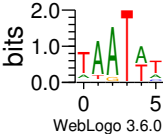

Supplement: SUPPLEMENTAL_Matl.zip [file ATHB-22_EKKKVQNAR_96.pdf › SUPPLEMENTAL_Matl/rCLAMPS/STAMP/alignedLogos_NoyesGrps/logos_1/ATHB-22_EKKKVQNAR_96.pdf]

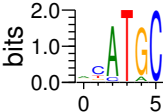

WebLogo 3.6.0

Supplement: SUPPLEMENTAL_Matl.zip [file ATHB-4_SRKKVQNAR.pdf › SUPPLEMENTAL_Matl/rCLAMPS/STAMP/alignedLogos_NoyesGrps/logos_1/ATHB-4_SRKKVQNAR.pdf]



WebLogo 3.6.0

Supplement: SUPPLEMENTAL_Matl.zip [file ATHB-4_SRKKVQNAR_97.pdf › SUPPLEMENTAL_Matl/rCLAMPS/STAMP/alignedLogos_NoyesGrps/logos_1/ATHB-4_SRKKVQNAR_97.pdf]

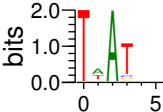

WebLogo 3.6.0

Supplement: SUPPLEMENTAL_Matl.zip [file ATHB-51_MIKKVQNAR_99.pdf › SUPPLEMENTAL_Matl/rCLAMPS/STAMP/alignedLogos_NoyesGrps/logos_1/ATHB-51_MIKKVQNAR_99.pdf]

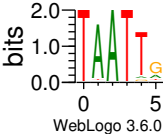

Supplement: SUPPLEMENTAL_Matl.zip [file ATHB-53_MLRKVQNAR_100.pdf › SUPPLEMENTAL_Matl/rCLAMPS/STAMP/alignedLogos_NoyesGrps/logos_1/ATHB-53_MLRKVQNAR_100.pdf]

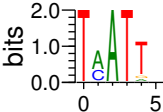

WebLogo 3.6.0

Supplement: SUPPLEMENTAL_Matl.zip [file ATHB-5_AEKKIQNAR_98.pdf › SUPPLEMENTAL_Matl/rCLAMPS/STAMP/alignedLogos_NoyesGrps/logos_1/ATHB-5_AEKKIQNAR_98.pdf]

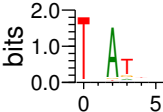

WebLogo 3.6.0

Supplement: SUPPLEMENTAL_Matl.zip [file ATHB-6_SEKKVQNAR.pdf › SUPPLEMENTAL_Matl/rCLAMPS/STAMP/alignedLogos_NoyesGrps/logos_1/ATHB-6_SEKKVQNAR.pdf]



WebLogo 3.6.0

Supplement: SUPPLEMENTAL_Matl.zip [file ATHB-6_SEKKVQNAR_101.pdf › SUPPLEMENTAL_Matl/rCLAMPS/STAMP/alignedLogos_NoyesGrps/logos_1/ATHB-6_SEKKVQNAR_101.pdf]

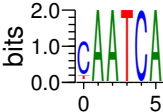

WebLogo 3.6.0

Supplement: SUPPLEMENTAL_Matl.zip [file ATHB-7_KNNQIQNAR.pdf › SUPPLEMENTAL_Matl/rCLAMPS/STAMP/alignedLogos_NoyesGrps/logos_1/ATHB-7_KNNQIQNAR.pdf]



WebLogo 3.6.0

Supplement: SUPPLEMENTAL_Matl.zip [file ATHB-7_KNNQIQNAR_102.pdf › SUPPLEMENTAL_Matl/rCLAMPS/STAMP/alignedLogos_NoyesGrps/logos_1/ATHB-7_KNNQIQNAR_102.pdf]

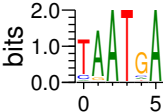

Supplement: SUPPLEMENTAL_Matl.zip [file ATHB-9_SGKYVQNCR_103.pdf › SUPPLEMENTAL_Matl/rCLAMPS/STAMP/alignedLogos_NoyesGrps/logos_1/ATHB-9_SGKYVQNCR_103.pdf]

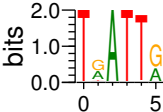

WebLogo 3.6.0

Supplement: SUPPLEMENTAL_Matl.zip [file ATHB-X_RRKKVQNAR_104.pdf › SUPPLEMENTAL_Matl/rCLAMPS/STAMP/alignedLogos_NoyesGrps/logos_1/ATHB-X_RRKKVQNAR_104.pdf]

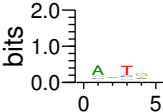

Supplement: SUPPLEMENTAL_Matl.zip [file ATML1_KKRYFQNTQ.pdf › SUPPLEMENTAL_Matl/rCLAMPS/STAMP/alignedLogos_NoyesGrps/logos_1/ATML1_KKRYFQNTQ.pdf]



Supplement: SUPPLEMENTAL_Matl.zip [file ATML1_KKRYFQNTQ_105.pdf › SUPPLEMENTAL_Matl/rCLAMPS/STAMP/alignedLogos_NoyesGrps/logos_1/ATML1_KKRYFQNTQ_105.pdf]

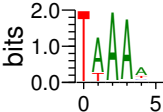

WebLogo 3.6.0

Supplement: SUPPLEMENTAL_Matl.zip [file Abd-B_RKKRIQNMK.pdf › SUPPLEMENTAL_Matl/rCLAMPS/STAMP/alignedLogos_NoyesGrps/logos_1/Abd-B_RKKRIQNMK.pdf]



WebLogo 3.6.0

Supplement: SUPPLEMENTAL_Matl.zip [file Abd-B_RKKRIQNMK_106.pdf › SUPPLEMENTAL_Matl/rCLAMPS/STAMP/alignedLogos_NoyesGrps/logos_1/Abd-B_RKKRIQNMK_106.pdf]

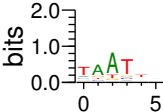

WebLogo 3.6.0

Supplement: SUPPLEMENTAL_Matl.zip [file Alx3_RRNRVQNAK_107.pdf › SUPPLEMENTAL_Matl/rCLAMPS/STAMP/alignedLogos_NoyesGrps/logos_1/Alx3_RRNRVQNAK_107.pdf]

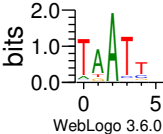

Supplement: SUPPLEMENTAL_Matl.zip [file Alx4_RRNRVQNAK_108.pdf › SUPPLEMENTAL_Matl/rCLAMPS/STAMP/alignedLogos_NoyesGrps/logos_1/Alx4_RRNRVQNAK_108.pdf]

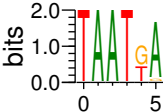

WebLogo 3.6.0

Supplement: SUPPLEMENTAL_Matl.zip [file Antp_KRGRIQNMK.pdf › SUPPLEMENTAL_Matl/rCLAMPS/STAMP/alignedLogos_NoyesGrps/logos_1/Antp_KRGRIQNMK.pdf]

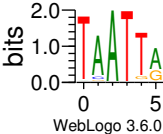

Supplement: SUPPLEMENTAL_Matl.zip [file Awh_KRVRVQNAR.pdf › SUPPLEMENTAL_Matl/rCLAMPS/STAMP/alignedLogos_NoyesGrps/logos_1/Awh_KRVRVQNAR.pdf]



Supplement: SUPPLEMENTAL_Matl.zip [file Awh_KRVRVQNAR_109.pdf › SUPPLEMENTAL_Matl/rCLAMPS/STAMP/alignedLogos_NoyesGrps/logos_1/Awh_KRVRVQNAR_109.pdf]

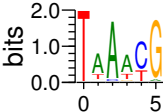

WebLogo 3.6.0

Supplement: SUPPLEMENTAL_Matl.zip [file B-H1_RKARTQNTK.pdf › SUPPLEMENTAL_Matl/rCLAMPS/STAMP/alignedLogos_NoyesGrps/logos_1/B-H1_RKARTQNTK.pdf]



WebLogo 3.6.0

Supplement: SUPPLEMENTAL_Matl.zip [file B-H1_RKARTQNTK_110.pdf › SUPPLEMENTAL_Matl/rCLAMPS/STAMP/alignedLogos_NoyesGrps/logos_1/B-H1_RKARTQNTK_110.pdf]

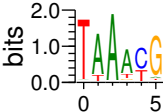

WebLogo 3.6.0

Supplement: SUPPLEMENTAL_Matl.zip [file B-H2_RKARTQNTK.pdf › SUPPLEMENTAL_Matl/rCLAMPS/STAMP/alignedLogos_NoyesGrps/logos_1/B-H2_RKARTQNTK.pdf]



WebLogo 3.6.0

Supplement: SUPPLEMENTAL_Matl.zip [file B-H2_RKARTQNTK_111.pdf › SUPPLEMENTAL_Matl/rCLAMPS/STAMP/alignedLogos_NoyesGrps/logos_1/B-H2_RKARTQNTK_111.pdf]

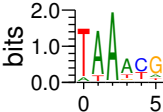

Supplement: SUPPLEMENTAL_Matl.zip [file BARHL1_RKARTQNTK.pdf › SUPPLEMENTAL_Matl/rCLAMPS/STAMP/alignedLogos_NoyesGrps/logos_1/BARHL1_RKARTQNTK.pdf]

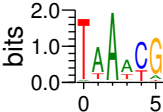

WebLogo 3.6.0

Supplement: SUPPLEMENTAL_Matl.zip [file BARHL1_RKARTQNTK_112.pdf › SUPPLEMENTAL_Matl/rCLAMPS/STAMP/alignedLogos_NoyesGrps/logos_1/BARHL1_RKARTQNTK_112.pdf]

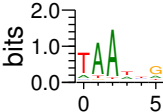

WebLogo 3.6.0

Supplement: SUPPLEMENTAL_Matl.zip [file BARHL2_RKARTQNTK.pdf › SUPPLEMENTAL_Matl/rCLAMPS/STAMP/alignedLogos_NoyesGrps/logos_1/BARHL2_RKARTQNTK.pdf]

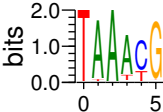

WebLogo 3.6.0

Supplement: SUPPLEMENTAL_Matl.zip [file BARHL2_RKARTQNTK_113.pdf › SUPPLEMENTAL_Matl/rCLAMPS/STAMP/alignedLogos_NoyesGrps/logos_1/BARHL2_RKARTQNTK_113.pdf]

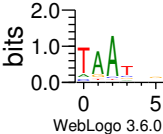

Supplement: SUPPLEMENTAL_Matl.zip [file BARX1_RRSRTQNMK.pdf › SUPPLEMENTAL_Matl/rCLAMPS/STAMP/alignedLogos_NoyesGrps/logos_1/BARX1_RRSRTQNMK.pdf]

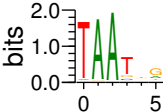

WebLogo 3.6.0

Supplement: SUPPLEMENTAL_Matl.zip [file BARX1_RRSRTQNMK_114.pdf › SUPPLEMENTAL_Matl/rCLAMPS/STAMP/alignedLogos_NoyesGrps/logos_1/BARX1_RRSRTQNMK_114.pdf]

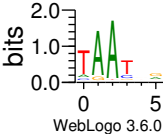

Supplement: SUPPLEMENTAL_Matl.zip [file BSX_RKARTQNMK.pdf › SUPPLEMENTAL_Matl/rCLAMPS/STAMP/alignedLogos_NoyesGrps/logos_1/BSX_RKARTQNMK.pdf]

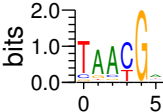

WebLogo 3.6.0

Supplement: SUPPLEMENTAL_Matl.zip [file BSX_RKARTQNMK_115.pdf › SUPPLEMENTAL_Matl/rCLAMPS/STAMP/alignedLogos_NoyesGrps/logos_1/BSX_RKARTQNMK_115.pdf]



WebLogo 3.6.0

Supplement: SUPPLEMENTAL_Matl.zip [file Barhl1_RKARTQNTK_116.pdf › SUPPLEMENTAL_Matl/rCLAMPS/STAMP/alignedLogos_NoyesGrps/logos_1/Barhl1_RKARTQNTK_116.pdf]



WebLogo 3.6.0

Supplement: SUPPLEMENTAL_Matl.zip [file Barhl2_RKARTQNTK_117.pdf › SUPPLEMENTAL_Matl/rCLAMPS/STAMP/alignedLogos_NoyesGrps/logos_1/Barhl2_RKARTQNTK_117.pdf]

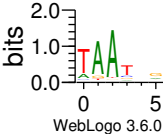

Supplement: SUPPLEMENTAL_Matl.zip [file Barx1_RRSRTQNMK_118.pdf › SUPPLEMENTAL_Matl/rCLAMPS/STAMP/alignedLogos_NoyesGrps/logos_1/Barx1_RRSRTQNMK_118.pdf]

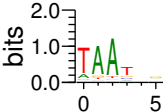

WebLogo 3.6.0

Supplement: SUPPLEMENTAL_Matl.zip [file Barx2_RRSRTQNMK.pdf › SUPPLEMENTAL_Matl/rCLAMPS/STAMP/alignedLogos_NoyesGrps/logos_1/Barx2_RRSRTQNMK.pdf]



WebLogo 3.6.0

Supplement: SUPPLEMENTAL_Matl.zip [file Barx2_RRSRTQNMK_119.pdf › SUPPLEMENTAL_Matl/rCLAMPS/STAMP/alignedLogos_NoyesGrps/logos_1/Barx2_RRSRTQNMK_119.pdf]



Supplement: SUPPLEMENTAL_Matl.zip [file Bsx_RKARTQNMK_120.pdf › SUPPLEMENTAL_Matl/rCLAMPS/STAMP/alignedLogos_NoyesGrps/logos_1/Bsx_RKARTQNMK_120.pdf]

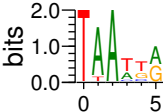

WebLogo 3.6.0

Supplement: SUPPLEMENTAL_Matl.zip [file C15_KKPRTQNTK.pdf › SUPPLEMENTAL_Matl/rCLAMPS/STAMP/alignedLogos_NoyesGrps/logos_1/C15_KKPRTQNTK.pdf]



WebLogo 3.6.0

Supplement: SUPPLEMENTAL_Matl.zip [file C15_KKPRTQNTK_121.pdf › SUPPLEMENTAL_Matl/rCLAMPS/STAMP/alignedLogos_NoyesGrps/logos_1/C15_KKPRTQNTK_121.pdf]

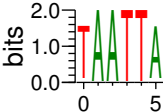

WebLogo 3.6.0

Supplement: SUPPLEMENTAL_Matl.zip [file C4B866_NEMVE_KRARVQNAK.pdf › SUPPLEMENTAL_Matl/rCLAMPS/STAMP/alignedLogos_NoyesGrps/logos_1/C4B866_NEMVE_KRARVQNAK.pdf]

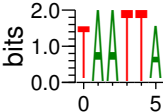

WebLogo 3.6.0

Supplement: SUPPLEMENTAL_Matl.zip [file C4B866_NEMVE_KRARVQNAK_122.pdf › SUPPLEMENTAL_Matl/rCLAMPS/STAMP/alignedLogos_NoyesGrps/logos_1/C4B866_NEMVE_KRARVQNAK_122.pdf]

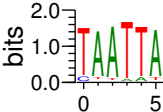

Supplement: SUPPLEMENTAL_Matl.zip [file CAD25284_KRSRIQNAR.pdf › SUPPLEMENTAL_Matl/rCLAMPS/STAMP/alignedLogos_NoyesGrps/logos_1/CAD25284_KRSRIQNAR.pdf]



WebLogo 3.6.0

Supplement: SUPPLEMENTAL_Matl.zip [file CAD25284_KRSRIQNAR_123.pdf › SUPPLEMENTAL_Matl/rCLAMPS/STAMP/alignedLogos_NoyesGrps/logos_1/CAD25284_KRSRIQNAR_123.pdf]

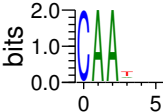

WebLogo 3.6.0

Supplement: SUPPLEMENTAL_Matl.zip [file CAD25866_SIKSNTNNR_124.pdf › SUPPLEMENTAL_Matl/rCLAMPS/STAMP/alignedLogos_NoyesGrps/logos_1/CAD25866_SIKSNTNNR_124.pdf]

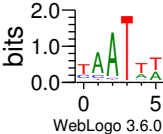

Supplement: SUPPLEMENTAL_Matl.zip [file CAD26261_VKHRVQNAK.pdf › SUPPLEMENTAL_Matl/rCLAMPS/STAMP/alignedLogos_NoyesGrps/logos_1/CAD26261_VKHRVQNAK.pdf]



Supplement: SUPPLEMENTAL_Matl.zip [file CAD26261_VKHRVQNAK_125.pdf › SUPPLEMENTAL_Matl/rCLAMPS/STAMP/alignedLogos_NoyesGrps/logos_1/CAD26261_VKHRVQNAK_125.pdf]

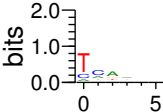

WebLogo 3.6.0

Supplement: SUPPLEMENTAL_Matl.zip [file CADAORAG00002315_RRKSNTNRR_126.pdf › SUPPLEMENTAL_Matl/rCLAMPS/STAMP/alignedLogos_NoyesGrps/logos_1/CADAORAG00002315_RRKSNTNRR_126.pdf]

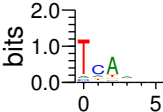

WebLogo 3.6.0

Supplement: SUPPLEMENTAL_Matl.zip [file CAGL0H02959g_VKKRNINRR.pdf › SUPPLEMENTAL_Matl/rCLAMPS/STAMP/alignedLogos_NoyesGrps/logos_1/CAGL0H02959g_VKKRNINRR.pdf]

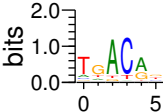

WebLogo 3.6.0

Supplement: SUPPLEMENTAL_Matl.zip [file CAGL0H02959g_VKKRNINRR_127.pdf › SUPPLEMENTAL_Matl/rCLAMPS/STAMP/alignedLogos_NoyesGrps/logos_1/CAGL0H02959g_VKKRNINRR_127.pdf]

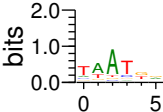

WebLogo 3.6.0

Supplement: SUPPLEMENTAL_Matl.zip [file CBG00023_KKGRIQNMK.pdf › SUPPLEMENTAL_Matl/rCLAMPS/STAMP/alignedLogos_NoyesGrps/logos_1/CBG00023_KKGRIQNMK.pdf]



WebLogo 3.6.0

Supplement: SUPPLEMENTAL_Matl.zip [file CBG00023_KKGRIQNMK_128.pdf › SUPPLEMENTAL_Matl/rCLAMPS/STAMP/alignedLogos_NoyesGrps/logos_1/CBG00023_KKGRIQNMK_128.pdf]

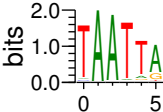

WebLogo 3.6.0

Supplement: SUPPLEMENTAL_Matl.zip [file CBG00029_KRTRIQNMK.pdf › SUPPLEMENTAL_Matl/rCLAMPS/STAMP/alignedLogos_NoyesGrps/logos_1/CBG00029_KRTRIQNMK.pdf]



WebLogo 3.6.0

Supplement: SUPPLEMENTAL_Matl.zip [file CBG00029_KRTRIQNMK_129.pdf › SUPPLEMENTAL_Matl/rCLAMPS/STAMP/alignedLogos_NoyesGrps/logos_1/CBG00029_KRTRIQNMK_129.pdf]

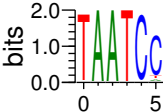

WebLogo 3.6.0

Supplement: SUPPLEMENTAL_Matl.zip [file CBG01820_RRQRVKNAK.pdf › SUPPLEMENTAL_Matl/rCLAMPS/STAMP/alignedLogos_NoyesGrps/logos_1/CBG01820_RRQRVKNAK.pdf]

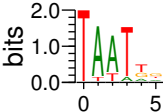

WebLogo 3.6.0

Supplement: SUPPLEMENTAL_Matl.zip [file CBG04010_TRVRVQNCK.pdf › SUPPLEMENTAL_Matl/rCLAMPS/STAMP/alignedLogos_NoyesGrps/logos_1/CBG04010_TRVRVQNCK.pdf]



WebLogo 3.6.0

Supplement: SUPPLEMENTAL_Matl.zip [file CBG04010_TRVRVQNCK_130.pdf › SUPPLEMENTAL_Matl/rCLAMPS/STAMP/alignedLogos_NoyesGrps/logos_1/CBG04010_TRVRVQNCK_130.pdf]

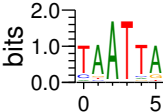

WebLogo 3.6.0

Supplement: SUPPLEMENTAL_Matl.zip [file CBG07641_RRFRVQNAK.pdf › SUPPLEMENTAL_Matl/rCLAMPS/STAMP/alignedLogos_NoyesGrps/logos_1/CBG07641_RRFRVQNAK.pdf]

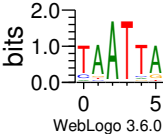

Supplement: SUPPLEMENTAL_Matl.zip [file CBG07641_RRFRVQNAK_131.pdf › SUPPLEMENTAL_Matl/rCLAMPS/STAMP/alignedLogos_NoyesGrps/logos_1/CBG07641_RRFRVQNAK_131.pdf]

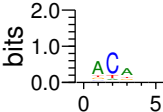

Supplement: SUPPLEMENTAL_Matl.zip [file CBG08197_KRNATANRR_132.pdf › SUPPLEMENTAL_Matl/rCLAMPS/STAMP/alignedLogos_NoyesGrps/logos_1/CBG08197_KRNATANRR_132.pdf]

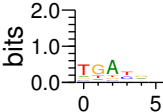

WebLogo 3.6.0

Supplement: SUPPLEMENTAL_Matl.zip [file CBG10835_GRKRNGNIR.pdf › SUPPLEMENTAL_Matl/rCLAMPS/STAMP/alignedLogos_NoyesGrps/logos_1/CBG10835_GRKRNGNIR.pdf]



WebLogo 3.6.0

Supplement: SUPPLEMENTAL_Matl.zip [file CBG10835_GRKRNGNIR_133.pdf › SUPPLEMENTAL_Matl/rCLAMPS/STAMP/alignedLogos_NoyesGrps/logos_1/CBG10835_GRKRNGNIR_133.pdf]

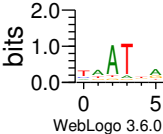

Supplement: SUPPLEMENTAL_Matl.zip [file CBG20882_KQSRVQNTK.pdf › SUPPLEMENTAL_Matl/rCLAMPS/STAMP/alignedLogos_NoyesGrps/logos_1/CBG20882_KQSRVQNTK.pdf]



Supplement: SUPPLEMENTAL_Matl.zip [file CBG20882_KQSRVQNTK_134.pdf › SUPPLEMENTAL_Matl/rCLAMPS/STAMP/alignedLogos_NoyesGrps/logos_1/CBG20882_KQSRVQNTK_134.pdf]

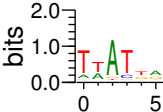

WebLogo 3.6.0

Supplement: SUPPLEMENTAL_Matl.zip [file CBG23031_KKKRVQNMK.pdf › SUPPLEMENTAL_Matl/rCLAMPS/STAMP/alignedLogos_NoyesGrps/logos_1/CBG23031_KKKRVQNMK.pdf]



WebLogo 3.6.0

Supplement: SUPPLEMENTAL_Matl.zip [file CBG23031_KKKRVQNMK_135.pdf › SUPPLEMENTAL_Matl/rCLAMPS/STAMP/alignedLogos_NoyesGrps/logos_1/CBG23031_KKKRVQNMK_135.pdf]

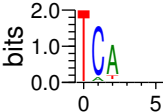

WebLogo 3.6.0

Supplement: SUPPLEMENTAL_Matl.zip [file CBG24578_KVPKNINRR.pdf › SUPPLEMENTAL_Matl/rCLAMPS/STAMP/alignedLogos_NoyesGrps/logos_1/CBG24578_KVPKNINRR.pdf]



Supplement: SUPPLEMENTAL_Matl.zip [file CBG24578_KVPKNINRR_136.pdf › SUPPLEMENTAL_Matl/rCLAMPS/STAMP/alignedLogos_NoyesGrps/logos_1/CBG24578_KVPKNINRR_136.pdf]

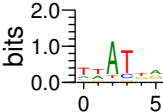

WebLogo 3.6.0

Supplement: SUPPLEMENTAL_Matl.zip [file CDX1_DKYRIQNAK.pdf › SUPPLEMENTAL_Matl/rCLAMPS/STAMP/alignedLogos_NoyesGrps/logos_1/CDX1_DKYRIQNAK.pdf]

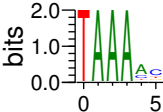

WebLogo 3.6.0

Supplement: SUPPLEMENTAL_Matl.zip [file CDX1_DKYRIQNAK_137.pdf › SUPPLEMENTAL_Matl/rCLAMPS/STAMP/alignedLogos_NoyesGrps/logos_1/CDX1_DKYRIQNAK_137.pdf]

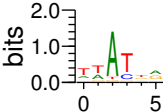

WebLogo 3.6.0

Supplement: SUPPLEMENTAL_Matl.zip [file CDX2_DKYRIQNAK.pdf › SUPPLEMENTAL_Matl/rCLAMPS/STAMP/alignedLogos_NoyesGrps/logos_1/CDX2_DKYRIQNAK.pdf]

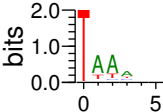

WebLogo 3.6.0

Supplement: SUPPLEMENTAL_Matl.zip [file CDX2_DKYRIQNAK_138.pdf › SUPPLEMENTAL_Matl/rCLAMPS/STAMP/alignedLogos_NoyesGrps/logos_1/CDX2_DKYRIQNAK_138.pdf]

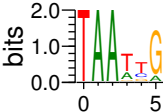

WebLogo 3.6.0

Supplement: SUPPLEMENTAL_Matl.zip [file CG11085_RRRRTQNTK.pdf › SUPPLEMENTAL_Matl/rCLAMPS/STAMP/alignedLogos_NoyesGrps/logos_1/CG11085_RRRRTQNTK.pdf]



WebLogo 3.6.0

Supplement: SUPPLEMENTAL_Matl.zip [file CG11085_RRRRTQNTK_139.pdf › SUPPLEMENTAL_Matl/rCLAMPS/STAMP/alignedLogos_NoyesGrps/logos_1/CG11085_RRRRTQNTK_139.pdf]

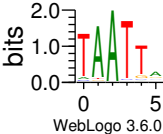

Supplement: SUPPLEMENTAL_Matl.zip [file CG11294_RRNRVQNAK.pdf › SUPPLEMENTAL_Matl/rCLAMPS/STAMP/alignedLogos_NoyesGrps/logos_1/CG11294_RRNRVQNAK.pdf]

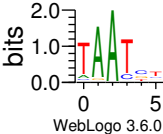

Supplement: SUPPLEMENTAL_Matl.zip [file CG11294_RRNRVQNAK_140.pdf › SUPPLEMENTAL_Matl/rCLAMPS/STAMP/alignedLogos_NoyesGrps/logos_1/CG11294_RRNRVQNAK_140.pdf]

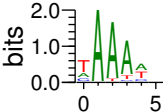

WebLogo 3.6.0

Supplement: SUPPLEMENTAL_Matl.zip [file CG11617_KRLFNANRK_141.pdf › SUPPLEMENTAL_Matl/rCLAMPS/STAMP/alignedLogos_NoyesGrps/logos_1/CG11617_KRLFNANRK_141.pdf]

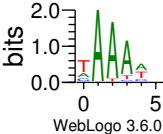

Supplement: SUPPLEMENTAL_Matl.zip [file CG11617_RATKNANRK.pdf › SUPPLEMENTAL_Matl/rCLAMPS/STAMP/alignedLogos_NoyesGrps/logos_1/CG11617_RATKNANRK.pdf]

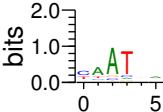

WebLogo 3.6.0

Supplement: SUPPLEMENTAL_Matl.zip [file CG15696_RLPRIQNAR.pdf › SUPPLEMENTAL_Matl/rCLAMPS/STAMP/alignedLogos_NoyesGrps/logos_1/CG15696_RLPRIQNAR.pdf]



WebLogo 3.6.0

Supplement: SUPPLEMENTAL_Matl.zip [file CG15696_RLPRIQNAR_142.pdf › SUPPLEMENTAL_Matl/rCLAMPS/STAMP/alignedLogos_NoyesGrps/logos_1/CG15696_RLPRIQNAR_142.pdf]

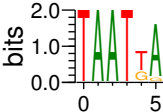

WebLogo 3.6.0

Supplement: SUPPLEMENTAL_Matl.zip [file CG18599_KRVRVQNIK.pdf › SUPPLEMENTAL_Matl/rCLAMPS/STAMP/alignedLogos_NoyesGrps/logos_1/CG18599_KRVRVQNIK.pdf]



WebLogo 3.6.0

Supplement: SUPPLEMENTAL_Matl.zip [file CG18599_KRVRVQNIK_143.pdf › SUPPLEMENTAL_Matl/rCLAMPS/STAMP/alignedLogos_NoyesGrps/logos_1/CG18599_KRVRVQNIK_143.pdf]

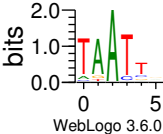

Supplement: SUPPLEMENTAL_Matl.zip [file CG2808_RRNRVQNAK.pdf › SUPPLEMENTAL_Matl/rCLAMPS/STAMP/alignedLogos_NoyesGrps/logos_1/CG2808_RRNRVQNAK.pdf]



Supplement: SUPPLEMENTAL_Matl.zip [file CG2808_RRNRVQNAK_144.pdf › SUPPLEMENTAL_Matl/rCLAMPS/STAMP/alignedLogos_NoyesGrps/logos_1/CG2808_RRNRVQNAK_144.pdf]

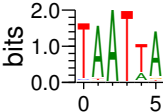

Supplement: SUPPLEMENTAL_Matl.zip [file CG32105_KRPRVQNAK.pdf › SUPPLEMENTAL_Matl/rCLAMPS/STAMP/alignedLogos_NoyesGrps/logos_1/CG32105_KRPRVQNAK.pdf]



WebLogo 3.6.0

Supplement: SUPPLEMENTAL_Matl.zip [file CG32105_KRPRVQNAK_145.pdf › SUPPLEMENTAL_Matl/rCLAMPS/STAMP/alignedLogos_NoyesGrps/logos_1/CG32105_KRPRVQNAK_145.pdf]

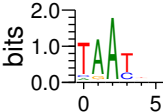

Supplement: SUPPLEMENTAL_Matl.zip [file CG32532_RRHRVQNAK.pdf › SUPPLEMENTAL_Matl/rCLAMPS/STAMP/alignedLogos_NoyesGrps/logos_1/CG32532_RRHRVQNAK.pdf]

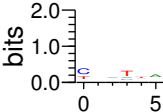

WebLogo 3.6.0

Supplement: SUPPLEMENTAL_Matl.zip [file CG34031_RKPRTQNTK.pdf › SUPPLEMENTAL_Matl/rCLAMPS/STAMP/alignedLogos_NoyesGrps/logos_1/CG34031_RKPRTQNTK.pdf]
