# Supplementary figures and images for: Learning probabilistic protein–DNA recognition codes from DNA-binding specificities using structural mappings (part 20 of 25)
Source: HighWire-hosted journal article supplement (doi:10.1101/gr.276606.122), 2022-09-01

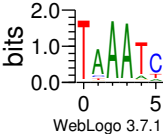

Supplement: SUPPLEMENTAL_Matl.zip [file CDX4_cisbp.pdf › pairlogos/CDX4_cisbp.pdf]

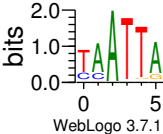

Supplement: SUPPLEMENTAL_Matl.zip [file CDX4_predicted.pdf › pairlogos/CDX4_predicted.pdf]

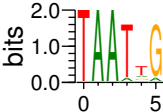

WebLogo 3.7.1

Supplement: SUPPLEMENTAL_Matl.zip [file CG11085_cisbp.pdf › pairlogos/CG11085_cisbp.pdf]

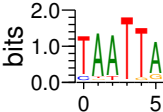

WebLogo 3.7.1

Supplement: SUPPLEMENTAL_Matl.zip [file CG11085_predicted.pdf › pairlogos/CG11085_predicted.pdf]

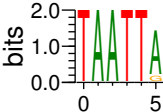

WebLogo 3.7.1

Supplement: SUPPLEMENTAL_Matl.zip [file CG11294_cisbp.pdf › pairlogos/CG11294_cisbp.pdf]

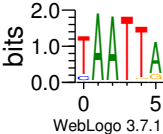

Supplement: SUPPLEMENTAL_Matl.zip [file CG11294_predicted.pdf › pairlogos/CG11294_predicted.pdf]

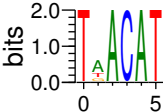

WebLogo 3.7.1

Supplement: SUPPLEMENTAL_Matl.zip [file CG11617_cisbp.pdf › pairlogos/CG11617_cisbp.pdf]

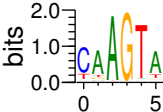

WebLogo 3.7.1

Supplement: SUPPLEMENTAL_Matl.zip [file CG11617_predicted.pdf › pairlogos/CG11617_predicted.pdf]

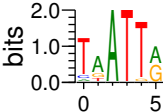

Supplement: SUPPLEMENTAL_Matl.zip [file CG15696_cisbp.pdf › pairlogos/CG15696_cisbp.pdf]

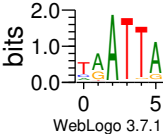

Supplement: SUPPLEMENTAL_Matl.zip [file CG15696_predicted.pdf › pairlogos/CG15696_predicted.pdf]

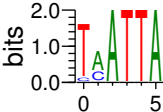

Supplement: SUPPLEMENTAL_Matl.zip [file CG18599_cisbp.pdf › pairlogos/CG18599_cisbp.pdf]

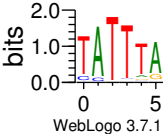

Supplement: SUPPLEMENTAL_Matl.zip [file CG18599_predicted.pdf › pairlogos/CG18599_predicted.pdf]

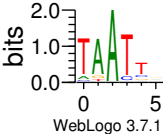

Supplement: SUPPLEMENTAL_Matl.zip [file CG2808_cisbp.pdf › pairlogos/CG2808_cisbp.pdf]



Supplement: SUPPLEMENTAL_Matl.zip [file CG2808_predicted.pdf › pairlogos/CG2808_predicted.pdf]

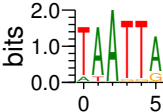

Supplement: SUPPLEMENTAL_Matl.zip [file CG32105_cisbp.pdf › pairlogos/CG32105_cisbp.pdf]

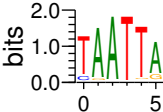

WebLogo 3.7.1

Supplement: SUPPLEMENTAL_Matl.zip [file CG32105_predicted.pdf › pairlogos/CG32105_predicted.pdf]

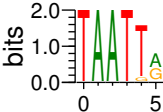

WebLogo 3.7.1

Supplement: SUPPLEMENTAL_Matl.zip [file CG32532_cisbp.pdf › pairlogos/CG32532_cisbp.pdf]

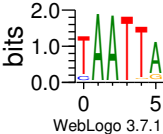

Supplement: SUPPLEMENTAL_Matl.zip [file CG32532_predicted.pdf › pairlogos/CG32532_predicted.pdf]

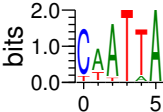

WebLogo 3.7.1

Supplement: SUPPLEMENTAL_Matl.zip [file CG34031_cisbp.pdf › pairlogos/CG34031_cisbp.pdf]

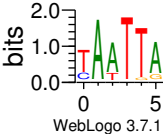

Supplement: SUPPLEMENTAL_Matl.zip [file CG34031_predicted.pdf › pairlogos/CG34031_predicted.pdf]

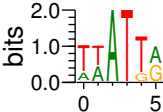

WebLogo 3.7.1

Supplement: SUPPLEMENTAL_Matl.zip [file CG4328_cisbp.pdf › pairlogos/CG4328_cisbp.pdf]



WebLogo 3.7.1

Supplement: SUPPLEMENTAL_Matl.zip [file CG4328_predicted.pdf › pairlogos/CG4328_predicted.pdf]

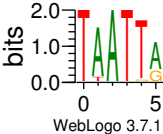

Supplement: SUPPLEMENTAL_Matl.zip [file CG9876_cisbp.pdf › pairlogos/CG9876_cisbp.pdf]



Supplement: SUPPLEMENTAL_Matl.zip [file CG9876_predicted.pdf › pairlogos/CG9876_predicted.pdf]

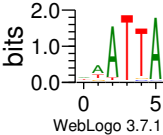

Supplement: SUPPLEMENTAL_Matl.zip [file CNG03450_cisbp.pdf › pairlogos/CNG03450_cisbp.pdf]

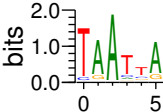

WebLogo 3.7.1

Supplement: SUPPLEMENTAL_Matl.zip [file CNG03450_predicted.pdf › pairlogos/CNG03450_predicted.pdf]

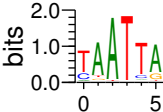

Supplement: SUPPLEMENTAL_Matl.zip [file CNK00090_cisbp.pdf › pairlogos/CNK00090_cisbp.pdf]

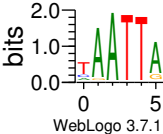

Supplement: SUPPLEMENTAL_Matl.zip [file CNK00090_predicted.pdf › pairlogos/CNK00090_predicted.pdf]

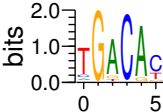

WebLogo 3.7.1

Supplement: SUPPLEMENTAL_Matl.zip [file CUP9_cisbp.pdf › pairlogos/CUP9_cisbp.pdf]

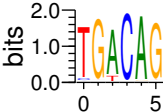

WebLogo 3.7.1

Supplement: SUPPLEMENTAL_Matl.zip [file CUP9_predicted.pdf › pairlogos/CUP9_predicted.pdf]

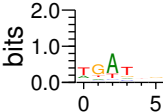

WebLogo 3.7.1

Supplement: SUPPLEMENTAL_Matl.zip [file Cphx1_cisbp.pdf › pairlogos/Cphx1_cisbp.pdf]

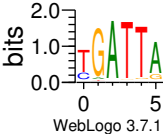

Supplement: SUPPLEMENTAL_Matl.zip [file Cphx1_predicted.pdf › pairlogos/Cphx1_predicted.pdf]

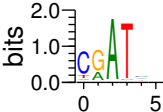

WebLogo 3.7.1

Supplement: SUPPLEMENTAL_Matl.zip [file Cux1_cisbp.pdf › pairlogos/Cux1_cisbp.pdf]

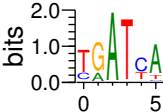

WebLogo 3.7.1

Supplement: SUPPLEMENTAL_Matl.zip [file Cux1_predicted.pdf › pairlogos/Cux1_predicted.pdf]

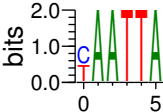

WebLogo 3.7.1

Supplement: SUPPLEMENTAL_Matl.zip [file DLX1_cisbp.pdf › pairlogos/DLX1_cisbp.pdf]

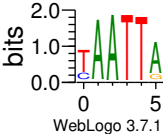

Supplement: SUPPLEMENTAL_Matl.zip [file DLX1_predicted.pdf › pairlogos/DLX1_predicted.pdf]

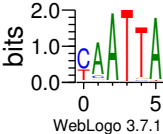

Supplement: SUPPLEMENTAL_Matl.zip [file DLX6_cisbp.pdf › pairlogos/DLX6_cisbp.pdf]



Supplement: SUPPLEMENTAL_Matl.zip [file DLX6_predicted.pdf › pairlogos/DLX6_predicted.pdf]

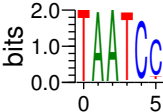

WebLogo 3.7.1

Supplement: SUPPLEMENTAL_Matl.zip [file DMBX1_cisbp.pdf › pairlogos/DMBX1_cisbp.pdf]

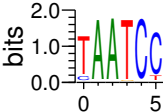

WebLogo 3.7.1

Supplement: SUPPLEMENTAL_Matl.zip [file DMBX1_predicted.pdf › pairlogos/DMBX1_predicted.pdf]

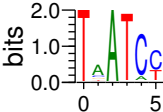

WebLogo 3.7.1

Supplement: SUPPLEMENTAL_Matl.zip [file DPRX_cisbp.pdf › pairlogos/DPRX_cisbp.pdf]

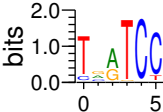

WebLogo 3.7.1

Supplement: SUPPLEMENTAL_Matl.zip [file DPRX_predicted.pdf › pairlogos/DPRX_predicted.pdf]

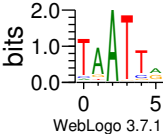

Supplement: SUPPLEMENTAL_Matl.zip [file DRGX_cisbp.pdf › pairlogos/DRGX_cisbp.pdf]



Supplement: SUPPLEMENTAL_Matl.zip [file DRGX_predicted.pdf › pairlogos/DRGX_predicted.pdf]

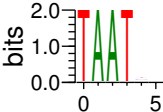

WebLogo 3.7.1

Supplement: SUPPLEMENTAL_Matl.zip [file Dfd_cisbp.pdf › pairlogos/Dfd_cisbp.pdf]

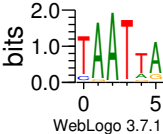

Supplement: SUPPLEMENTAL_Matl.zip [file Dfd_predicted.pdf › pairlogos/Dfd_predicted.pdf]

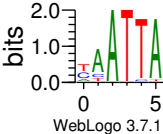

Supplement: SUPPLEMENTAL_Matl.zip [file Dll_cisbp.pdf › pairlogos/Dll_cisbp.pdf]



Supplement: SUPPLEMENTAL_Matl.zip [file Dll_predicted.pdf › pairlogos/Dll_predicted.pdf]

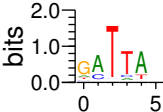

WebLogo 3.7.1

Supplement: SUPPLEMENTAL_Matl.zip [file Dobox5_CONSTRUCT_cisbp.pdf › pairlogos/Dobox5_CONSTRUCT_cisbp.pdf]

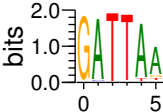

WebLogo 3.7.1

Supplement: SUPPLEMENTAL_Matl.zip [file Dobox5_CONSTRUCT_predicted.pdf › pairlogos/Dobox5_CONSTRUCT_predicted.pdf]

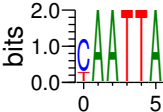

WebLogo 3.7.1

Supplement: SUPPLEMENTAL_Matl.zip [file Dr_cisbp.pdf › pairlogos/Dr_cisbp.pdf]

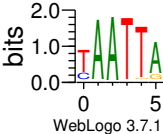

Supplement: SUPPLEMENTAL_Matl.zip [file Dr_predicted.pdf › pairlogos/Dr_predicted.pdf]

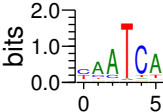

Supplement: SUPPLEMENTAL_Matl.zip [file Duxbl1_cisbp.pdf › pairlogos/Duxbl1_cisbp.pdf]

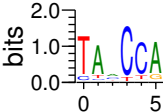

WebLogo 3.7.1

Supplement: SUPPLEMENTAL_Matl.zip [file Duxbl1_predicted.pdf › pairlogos/Duxbl1_predicted.pdf]

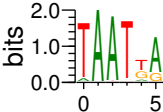

Supplement: SUPPLEMENTAL_Matl.zip [file E5_cisbp.pdf › pairlogos/E5_cisbp.pdf]

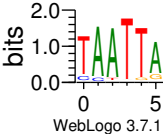

Supplement: SUPPLEMENTAL_Matl.zip [file E5_predicted.pdf › pairlogos/E5_predicted.pdf]

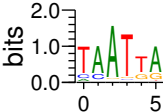

WebLogo 3.7.1

Supplement: SUPPLEMENTAL_Matl.zip [file EMX2_cisbp.pdf › pairlogos/EMX2_cisbp.pdf]

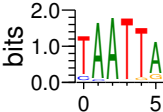

WebLogo 3.7.1

Supplement: SUPPLEMENTAL_Matl.zip [file EMX2_predicted.pdf › pairlogos/EMX2_predicted.pdf]

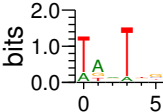

WebLogo 3.7.1

Supplement: SUPPLEMENTAL_Matl.zip [file EN1_cisbp.pdf › pairlogos/EN1_cisbp.pdf]

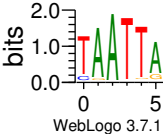

Supplement: SUPPLEMENTAL_Matl.zip [file EN1_predicted.pdf › pairlogos/EN1_predicted.pdf]

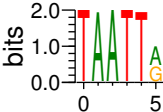

WebLogo 3.7.1

Supplement: SUPPLEMENTAL_Matl.zip [file EN2_cisbp.pdf › pairlogos/EN2_cisbp.pdf]



Supplement: SUPPLEMENTAL_Matl.zip [file EN2_predicted.pdf › pairlogos/EN2_predicted.pdf]

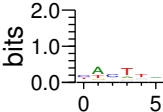

WebLogo 3.7.1

Supplement: SUPPLEMENTAL_Matl.zip [file ENSCING00000007395_cisbp.pdf › pairlogos/ENSCING00000007395_cisbp.pdf]

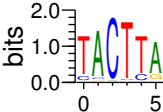

WebLogo 3.7.1

Supplement: SUPPLEMENTAL_Matl.zip [file ENSCING00000007395_predicted.pdf › pairlogos/ENSCING00000007395_predicted.pdf]

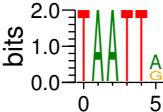

WebLogo 3.7.1

Supplement: SUPPLEMENTAL_Matl.zip [file ENSCING00000016045_cisbp.pdf › pairlogos/ENSCING00000016045_cisbp.pdf]

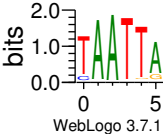

Supplement: SUPPLEMENTAL_Matl.zip [file ENSCING00000016045_predicted.pdf › pairlogos/ENSCING00000016045_predicted.pdf]

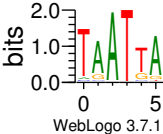

Supplement: SUPPLEMENTAL_Matl.zip [file ENSTNIG00000004116_cisbp.pdf › pairlogos/ENSTNIG00000004116_cisbp.pdf]

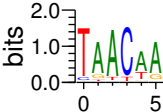

WebLogo 3.7.1

Supplement: SUPPLEMENTAL_Matl.zip [file ENSTNIG00000004116_predicted.pdf › pairlogos/ENSTNIG00000004116_predicted.pdf]

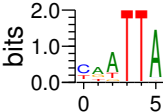

WebLogo 3.7.1

Supplement: SUPPLEMENTAL_Matl.zip [file ENSTNIG00000006040_cisbp.pdf › pairlogos/ENSTNIG00000006040_cisbp.pdf]

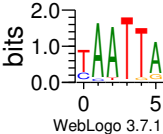

Supplement: SUPPLEMENTAL_Matl.zip [file ENSTNIG00000006040_predicted.pdf › pairlogos/ENSTNIG00000006040_predicted.pdf]

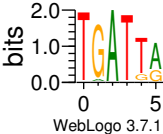

Supplement: SUPPLEMENTAL_Matl.zip [file ENSTNIG00000017092_cisbp.pdf › pairlogos/ENSTNIG00000017092_cisbp.pdf]

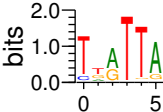

WebLogo 3.7.1

Supplement: SUPPLEMENTAL_Matl.zip [file ENSTNIG00000017092_predicted.pdf › pairlogos/ENSTNIG00000017092_predicted.pdf]

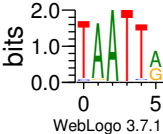

Supplement: SUPPLEMENTAL_Matl.zip [file ESX1_cisbp.pdf › pairlogos/ESX1_cisbp.pdf]

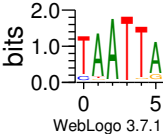

Supplement: SUPPLEMENTAL_Matl.zip [file ESX1_predicted.pdf › pairlogos/ESX1_predicted.pdf]

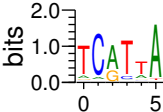

WebLogo 3.7.1

Supplement: SUPPLEMENTAL_Matl.zip [file EVX1_cisbp.pdf › pairlogos/EVX1_cisbp.pdf]

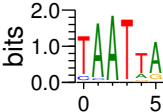

WebLogo 3.7.1

Supplement: SUPPLEMENTAL_Matl.zip [file EVX1_predicted.pdf › pairlogos/EVX1_predicted.pdf]

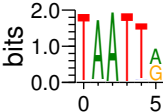

WebLogo 3.7.1

Supplement: SUPPLEMENTAL_Matl.zip [file GBX1_cisbp.pdf › pairlogos/GBX1_cisbp.pdf]

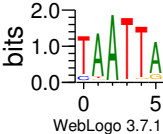

Supplement: SUPPLEMENTAL_Matl.zip [file GBX1_predicted.pdf › pairlogos/GBX1_predicted.pdf]

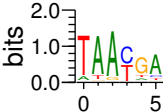

WebLogo 3.7.1

Supplement: SUPPLEMENTAL_Matl.zip [file GBX2_cisbp.pdf › pairlogos/GBX2_cisbp.pdf]



Supplement: SUPPLEMENTAL_Matl.zip [file GBX2_predicted.pdf › pairlogos/GBX2_predicted.pdf]

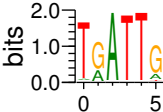

Supplement: SUPPLEMENTAL_Matl.zip [file GRMZM2G038252_cisbp.pdf › pairlogos/GRMZM2G038252_cisbp.pdf]

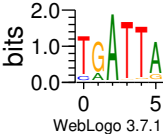

Supplement: SUPPLEMENTAL_Matl.zip [file GRMZM2G038252_predicted.pdf › pairlogos/GRMZM2G038252_predicted.pdf]

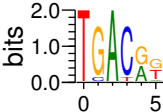

WebLogo 3.7.1

Supplement: SUPPLEMENTAL_Matl.zip [file GRMZM2G087741_cisbp.pdf › pairlogos/GRMZM2G087741_cisbp.pdf]

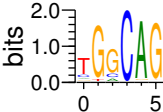

WebLogo 3.7.1

Supplement: SUPPLEMENTAL_Matl.zip [file GRMZM2G087741_predicted.pdf › pairlogos/GRMZM2G087741_predicted.pdf]

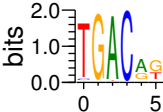

WebLogo 3.7.1

Supplement: SUPPLEMENTAL_Matl.zip [file GRMZM2G135447_cisbp.pdf › pairlogos/GRMZM2G135447_cisbp.pdf]



WebLogo 3.7.1

Supplement: SUPPLEMENTAL_Matl.zip [file GRMZM2G135447_predicted.pdf › pairlogos/GRMZM2G135447_predicted.pdf]

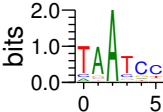

WebLogo 3.7.1

Supplement: SUPPLEMENTAL_Matl.zip [file GSC2_cisbp.pdf › pairlogos/GSC2_cisbp.pdf]

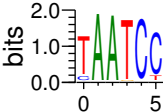

WebLogo 3.7.1

Supplement: SUPPLEMENTAL_Matl.zip [file GSC2_predicted.pdf › pairlogos/GSC2_predicted.pdf]

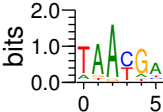

WebLogo 3.7.1

Supplement: SUPPLEMENTAL_Matl.zip [file GSX1_cisbp.pdf › pairlogos/GSX1_cisbp.pdf]

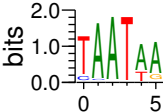

WebLogo 3.7.1

Supplement: SUPPLEMENTAL_Matl.zip [file GSX1_predicted.pdf › pairlogos/GSX1_predicted.pdf]

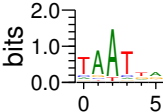

WebLogo 3.7.1

Supplement: SUPPLEMENTAL_Matl.zip [file GSX2_cisbp.pdf › pairlogos/GSX2_cisbp.pdf]



WebLogo 3.7.1

Supplement: SUPPLEMENTAL_Matl.zip [file GSX2_predicted.pdf › pairlogos/GSX2_predicted.pdf]

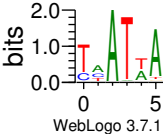

Supplement: SUPPLEMENTAL_Matl.zip [file H2.0_cisbp.pdf › pairlogos/H2.0_cisbp.pdf]

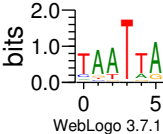

Supplement: SUPPLEMENTAL_Matl.zip [file H2.0_predicted.pdf › pairlogos/H2.0_predicted.pdf]

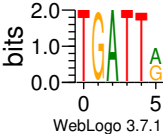

Supplement: SUPPLEMENTAL_Matl.zip [file HAT1_cisbp.pdf › pairlogos/HAT1_cisbp.pdf]

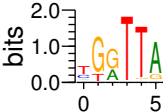

WebLogo 3.7.1

Supplement: SUPPLEMENTAL_Matl.zip [file HAT1_predicted.pdf › pairlogos/HAT1_predicted.pdf]

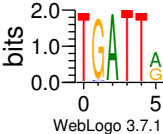

Supplement: SUPPLEMENTAL_Matl.zip [file HAT22_cisbp.pdf › pairlogos/HAT22_cisbp.pdf]



WebLogo 3.7.1

Supplement: SUPPLEMENTAL_Matl.zip [file HAT22_predicted.pdf › pairlogos/HAT22_predicted.pdf]

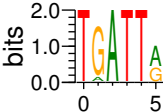

WebLogo 3.7.1

Supplement: SUPPLEMENTAL_Matl.zip [file HAT2_cisbp.pdf › pairlogos/HAT2_cisbp.pdf]

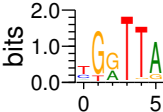

WebLogo 3.7.1

Supplement: SUPPLEMENTAL_Matl.zip [file HAT2_predicted.pdf › pairlogos/HAT2_predicted.pdf]
