# Supplementary figures and images for: Learning probabilistic protein–DNA recognition codes from DNA-binding specificities using structural mappings (part 14 of 25)
Source: HighWire-hosted journal article supplement (doi:10.1101/gr.276606.122), 2022-09-01

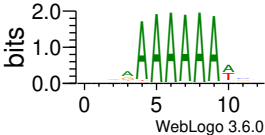

Supplement: SUPPLEMENTAL_Matl.zip [file CG2052_SHQQQSHQQSNQTSST_7.pdf › SUPPLEMENTAL_Matl/rCLAMPS/my_results/zf-C2H2_250_50_seedFFSdiverse6/0_logos_aligned_hoo/CG2052_SHQQQSHQQSNQTSST_7.pdf]

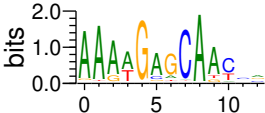

Supplement: SUPPLEMENTAL_Matl.zip [file CG31670_AYNRQSTRRSTTQGNN_8.pdf › SUPPLEMENTAL_Matl/rCLAMPS/my_results/zf-C2H2_250_50_seedFFSdiverse6/0_logos_aligned_hoo/CG31670_AYNRQSTRRSTTQGNN_8.pdf]

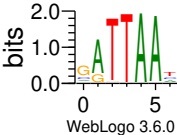

Supplement: SUPPLEMENTAL_Matl.zip [file CG32830_ERVQHNSN_9.pdf › SUPPLEMENTAL_Matl/rCLAMPS/my_results/zf-C2H2_250_50_seedFFSdiverse6/0_logos_aligned_hoo/CG32830_ERVQHNSN_9.pdf]

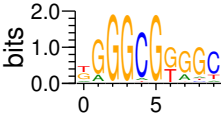

WebLogo 3.6.0

Supplement: SUPPLEMENTAL_Matl.zip [file CG5669_KSHARDERRDHR_10.pdf › SUPPLEMENTAL_Matl/rCLAMPS/my_results/zf-C2H2_250_50_seedFFSdiverse6/0_logos_aligned_hoo/CG5669_KSHARDERRDHR_10.pdf]

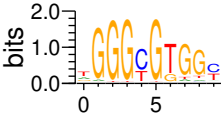

WebLogo 3.6.0

Supplement: SUPPLEMENTAL_Matl.zip [file CG9895_KSHARDERRDHL_11.pdf › SUPPLEMENTAL_Matl/rCLAMPS/my_results/zf-C2H2_250_50_seedFFSdiverse6/0_logos_aligned_hoo/CG9895_KSHARDERRDHL_11.pdf]

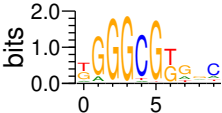

Supplement: SUPPLEMENTAL_Matl.zip [file Sp1_KSHARDERRDHK_12.pdf › SUPPLEMENTAL_Matl/rCLAMPS/my_results/zf-C2H2_250_50_seedFFSdiverse6/0_logos_aligned_hoo/Sp1_KSHARDERRDHK_12.pdf]

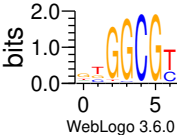

Supplement: SUPPLEMENTAL_Matl.zip [file T078154_2.00_RHDRRDAR_13.pdf › SUPPLEMENTAL_Matl/rCLAMPS/my_results/zf-C2H2_250_50_seedFFSdiverse6/0_logos_aligned_hoo/T078154_2.00_RHDRRDAR_13.pdf]

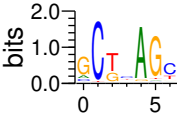

WebLogo 3.6.0

Supplement: SUPPLEMENTAL_Matl.zip [file T078167_2.00_RNNERHDR_14.pdf › SUPPLEMENTAL_Matl/rCLAMPS/my_results/zf-C2H2_250_50_seedFFSdiverse6/0_logos_aligned_hoo/T078167_2.00_RNNERHDR_14.pdf]

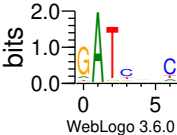

Supplement: SUPPLEMENTAL_Matl.zip [file T078175_2.00_RSSIVSNR_15.pdf › SUPPLEMENTAL_Matl/rCLAMPS/my_results/zf-C2H2_250_50_seedFFSdiverse6/0_logos_aligned_hoo/T078175_2.00_RSSIVSNR_15.pdf]

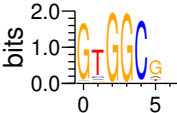

WebLogo 3.6.0

Supplement: SUPPLEMENTAL_Matl.zip [file T078179_2.00_RYDRRDAR_16.pdf › SUPPLEMENTAL_Matl/rCLAMPS/my_results/zf-C2H2_250_50_seedFFSdiverse6/0_logos_aligned_hoo/T078179_2.00_RYDRRDAR_16.pdf]

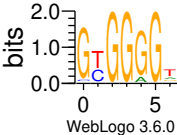

Supplement: SUPPLEMENTAL_Matl.zip [file T078185_2.00_REHRRDER_17.pdf › SUPPLEMENTAL_Matl/rCLAMPS/my_results/zf-C2H2_250_50_seedFFSdiverse6/0_logos_aligned_hoo/T078185_2.00_REHRRDER_17.pdf]

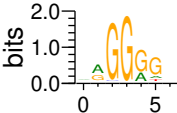

WebLogo 3.6.0

Supplement: SUPPLEMENTAL_Matl.zip [file T078186_2.00_REHRRDNQ_18.pdf › SUPPLEMENTAL_Matl/rCLAMPS/my_results/zf-C2H2_250_50_seedFFSdiverse6/0_logos_aligned_hoo/T078186_2.00_REHRRDNQ_18.pdf]

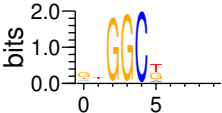

Supplement: SUPPLEMENTAL_Matl.zip [file T078189_2.00_RYNSRHDRRDAR_19.pdf › SUPPLEMENTAL_Matl/rCLAMPS/my_results/zf-C2H2_250_50_seedFFSdiverse6/0_logos_aligned_hoo/T078189_2.00_RYNSRHDRRDAR_19.pdf]

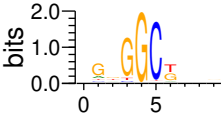

WebLogo 3.6.0

Supplement: SUPPLEMENTAL_Matl.zip [file T078206_2.00_RYNSRHDRRDAR_20.pdf › SUPPLEMENTAL_Matl/rCLAMPS/my_results/zf-C2H2_250_50_seedFFSdiverse6/0_logos_aligned_hoo/T078206_2.00_RYNSRHDRRDAR_20.pdf]

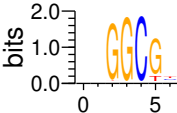

WebLogo 3.6.0

Supplement: SUPPLEMENTAL_Matl.zip [file T078207_2.00_RYDRRDAR_21.pdf › SUPPLEMENTAL_Matl/rCLAMPS/my_results/zf-C2H2_250_50_seedFFSdiverse6/0_logos_aligned_hoo/T078207_2.00_RYDRRDAR_21.pdf]

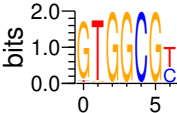

Supplement: SUPPLEMENTAL_Matl.zip [file T078214_2.00_RHDRRDAR_22.pdf › SUPPLEMENTAL_Matl/rCLAMPS/my_results/zf-C2H2_250_50_seedFFSdiverse6/0_logos_aligned_hoo/T078214_2.00_RHDRRDAR_22.pdf]

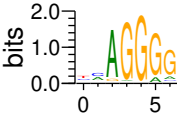

Supplement: SUPPLEMENTAL_Matl.zip [file T078219_2.00_REHRRDNA_23.pdf › SUPPLEMENTAL_Matl/rCLAMPS/my_results/zf-C2H2_250_50_seedFFSdiverse6/0_logos_aligned_hoo/T078219_2.00_REHRRDNA_23.pdf]

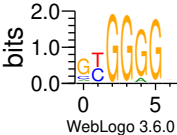

Supplement: SUPPLEMENTAL_Matl.zip [file T078228_2.00_REHRRDER_24.pdf › SUPPLEMENTAL_Matl/rCLAMPS/my_results/zf-C2H2_250_50_seedFFSdiverse6/0_logos_aligned_hoo/T078228_2.00_REHRRDER_24.pdf]

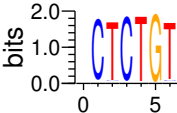

WebLogo 3.6.0

Supplement: SUPPLEMENTAL_Matl.zip [file T080858_2.00_WWSEFSDR_25.pdf › SUPPLEMENTAL_Matl/rCLAMPS/my_results/zf-C2H2_250_50_seedFFSdiverse6/0_logos_aligned_hoo/T080858_2.00_WWSEFSDR_25.pdf]

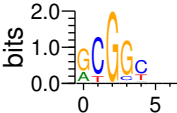

WebLogo 3.6.0

Supplement: SUPPLEMENTAL_Matl.zip [file T080990_2.00_RHDRRDAR_26.pdf › SUPPLEMENTAL_Matl/rCLAMPS/my_results/zf-C2H2_250_50_seedFFSdiverse6/0_logos_aligned_hoo/T080990_2.00_RHDRRDAR_26.pdf]

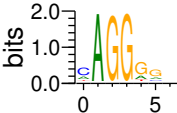

WebLogo 3.6.0

Supplement: SUPPLEMENTAL_Matl.zip [file T082403_2.00_REHRRDNQ_27.pdf › SUPPLEMENTAL_Matl/rCLAMPS/my_results/zf-C2H2_250_50_seedFFSdiverse6/0_logos_aligned_hoo/T082403_2.00_REHRRDNQ_27.pdf]

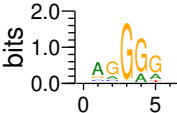

Supplement: SUPPLEMENTAL_Matl.zip [file T082404_2.00_REHRRDNQ_28.pdf › SUPPLEMENTAL_Matl/rCLAMPS/my_results/zf-C2H2_250_50_seedFFSdiverse6/0_logos_aligned_hoo/T082404_2.00_REHRRDNQ_28.pdf]

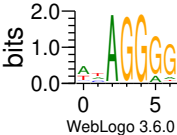

Supplement: SUPPLEMENTAL_Matl.zip [file T082423_2.00_REHRRDNQ_29.pdf › SUPPLEMENTAL_Matl/rCLAMPS/my_results/zf-C2H2_250_50_seedFFSdiverse6/0_logos_aligned_hoo/T082423_2.00_REHRRDNQ_29.pdf]

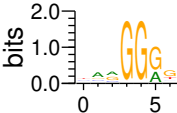

WebLogo 3.6.0

Supplement: SUPPLEMENTAL_Matl.zip [file T082432_2.00_REHRRDNQ_30.pdf › SUPPLEMENTAL_Matl/rCLAMPS/my_results/zf-C2H2_250_50_seedFFSdiverse6/0_logos_aligned_hoo/T082432_2.00_REHRRDNQ_30.pdf]

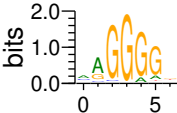

WebLogo 3.6.0

Supplement: SUPPLEMENTAL_Matl.zip [file T082498_2.00_REHRRDNQ_31.pdf › SUPPLEMENTAL_Matl/rCLAMPS/my_results/zf-C2H2_250_50_seedFFSdiverse6/0_logos_aligned_hoo/T082498_2.00_REHRRDNQ_31.pdf]

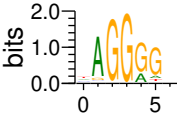

WebLogo 3.6.0

Supplement: SUPPLEMENTAL_Matl.zip [file T082506_2.00_REHRRDNQ_32.pdf › SUPPLEMENTAL_Matl/rCLAMPS/my_results/zf-C2H2_250_50_seedFFSdiverse6/0_logos_aligned_hoo/T082506_2.00_REHRRDNQ_32.pdf]

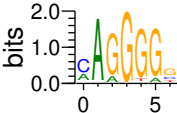

WebLogo 3.6.0

Supplement: SUPPLEMENTAL_Matl.zip [file T082509_2.00_REHRRDNQ_33.pdf › SUPPLEMENTAL_Matl/rCLAMPS/my_results/zf-C2H2_250_50_seedFFSdiverse6/0_logos_aligned_hoo/T082509_2.00_REHRRDNQ_33.pdf]

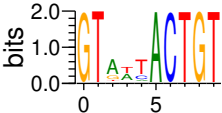

WebLogo 3.6.0

Supplement: SUPPLEMENTAL_Matl.zip [file T094781_2.00_LHQTDSAKSASA_34.pdf › SUPPLEMENTAL_Matl/rCLAMPS/my_results/zf-C2H2_250_50_seedFFSdiverse6/0_logos_aligned_hoo/T094781_2.00_LHQTDSAKSASA_34.pdf]

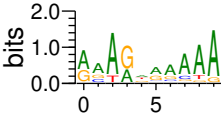

WebLogo 3.6.0

Supplement: SUPPLEMENTAL_Matl.zip [file T094790_2.00_QSENGTTNQTQR_35.pdf › SUPPLEMENTAL_Matl/rCLAMPS/my_results/zf-C2H2_250_50_seedFFSdiverse6/0_logos_aligned_hoo/T094790_2.00_QSENGTTNQTQR_35.pdf]

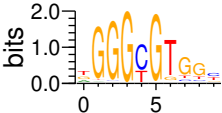

Supplement: SUPPLEMENTAL_Matl.zip [file T094796_2.00_KSHARDERRDHL_36.pdf › SUPPLEMENTAL_Matl/rCLAMPS/my_results/zf-C2H2_250_50_seedFFSdiverse6/0_logos_aligned_hoo/T094796_2.00_KSHARDERRDHL_36.pdf]

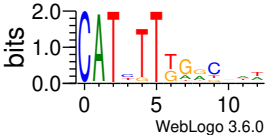

Supplement: SUPPLEMENTAL_Matl.zip [file T094823_2.00_DSAKESKRLFNTQTNS_37.pdf › SUPPLEMENTAL_Matl/rCLAMPS/my_results/zf-C2H2_250_50_seedFFSdiverse6/0_logos_aligned_hoo/T094823_2.00_DSAKESKRLFNTQTNS_37.pdf]

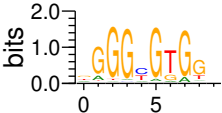

WebLogo 3.6.0

Supplement: SUPPLEMENTAL_Matl.zip [file T094828_2.00_KSHARDERRDHL_38.pdf › SUPPLEMENTAL_Matl/rCLAMPS/my_results/zf-C2H2_250_50_seedFFSdiverse6/0_logos_aligned_hoo/T094828_2.00_KSHARDERRDHL_38.pdf]

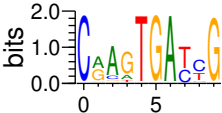

WebLogo 3.6.0

Supplement: SUPPLEMENTAL_Matl.zip [file T094834_2.00_WSERRSTLQSNQ_39.pdf › SUPPLEMENTAL_Matl/rCLAMPS/my_results/zf-C2H2_250_50_seedFFSdiverse6/0_logos_aligned_hoo/T094834_2.00_WSERRSTLQSNQ_39.pdf]

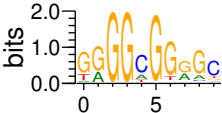

WebLogo 3.6.0

Supplement: SUPPLEMENTAL_Matl.zip [file T094844_2.00_KSHARDERRDHK_40.pdf › SUPPLEMENTAL_Matl/rCLAMPS/my_results/zf-C2H2_250_50_seedFFSdiverse6/0_logos_aligned_hoo/T094844_2.00_KSHARDERRDHK_40.pdf]

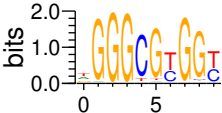

WebLogo 3.6.0

Supplement: SUPPLEMENTAL_Matl.zip [file T094848_2.00_KSHARDERRDHL_41.pdf › SUPPLEMENTAL_Matl/rCLAMPS/my_results/zf-C2H2_250_50_seedFFSdiverse6/0_logos_aligned_hoo/T094848_2.00_KSHARDERRDHL_41.pdf]

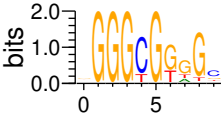

WebLogo 3.6.0

Supplement: SUPPLEMENTAL_Matl.zip [file T094864_2.00_KSHARDERRDHL_42.pdf › SUPPLEMENTAL_Matl/rCLAMPS/my_results/zf-C2H2_250_50_seedFFSdiverse6/0_logos_aligned_hoo/T094864_2.00_KSHARDERRDHL_42.pdf]

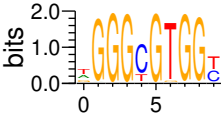

WebLogo 3.6.0

Supplement: SUPPLEMENTAL_Matl.zip [file T094867_2.00_KSHARDERRDHL_43.pdf › SUPPLEMENTAL_Matl/rCLAMPS/my_results/zf-C2H2_250_50_seedFFSdiverse6/0_logos_aligned_hoo/T094867_2.00_KSHARDERRDHL_43.pdf]

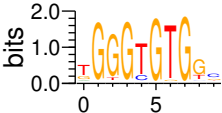

WebLogo 3.6.0

Supplement: SUPPLEMENTAL_Matl.zip [file T094868_2.00_KSHARDERRDHK_44.pdf › SUPPLEMENTAL_Matl/rCLAMPS/my_results/zf-C2H2_250_50_seedFFSdiverse6/0_logos_aligned_hoo/T094868_2.00_KSHARDERRDHK_44.pdf]

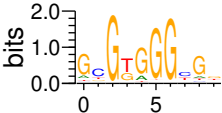

WebLogo 3.6.0

Supplement: SUPPLEMENTAL_Matl.zip [file T094872_2.00_RDERRDHTRDER_45.pdf › SUPPLEMENTAL_Matl/rCLAMPS/my_results/zf-C2H2_250_50_seedFFSdiverse6/0_logos_aligned_hoo/T094872_2.00_RDERRDHTRDER_45.pdf]

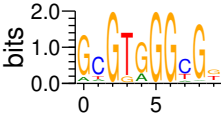

Supplement: SUPPLEMENTAL_Matl.zip [file T094882_2.00_RDERRDHTRDER_46.pdf › SUPPLEMENTAL_Matl/rCLAMPS/my_results/zf-C2H2_250_50_seedFFSdiverse6/0_logos_aligned_hoo/T094882_2.00_RDERRDHTRDER_46.pdf]

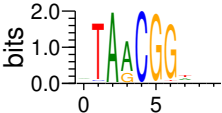

WebLogo 3.6.0

Supplement: SUPPLEMENTAL_Matl.zip [file T094895_2.00_LRMRDFDRQCSS_47.pdf › SUPPLEMENTAL_Matl/rCLAMPS/my_results/zf-C2H2_250_50_seedFFSdiverse6/0_logos_aligned_hoo/T094895_2.00_LRMRDFDRQCSS_47.pdf]

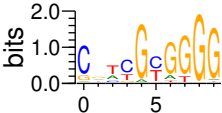

WebLogo 3.6.0

Supplement: SUPPLEMENTAL_Matl.zip [file T094898_2.00_RENINSDKDSSK_48.pdf › SUPPLEMENTAL_Matl/rCLAMPS/my_results/zf-C2H2_250_50_seedFFSdiverse6/0_logos_aligned_hoo/T094898_2.00_RENINSDKDSSK_48.pdf]

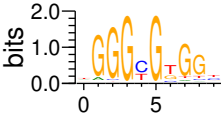

Supplement: SUPPLEMENTAL_Matl.zip [file T094904_2.00_KSHARDERRDHL_49.pdf › SUPPLEMENTAL_Matl/rCLAMPS/my_results/zf-C2H2_250_50_seedFFSdiverse6/0_logos_aligned_hoo/T094904_2.00_KSHARDERRDHL_49.pdf]

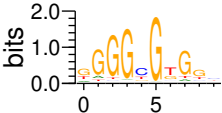

WebLogo 3.6.0

Supplement: SUPPLEMENTAL_Matl.zip [file T094908_2.00_KSHSRDERRDHK_50.pdf › SUPPLEMENTAL_Matl/rCLAMPS/my_results/zf-C2H2_250_50_seedFFSdiverse6/0_logos_aligned_hoo/T094908_2.00_KSHSRDERRDHK_50.pdf]

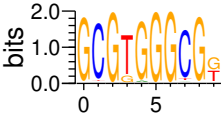

WebLogo 3.6.0

Supplement: SUPPLEMENTAL_Matl.zip [file T094930_2.00_RDERRDHTRDER_51.pdf › SUPPLEMENTAL_Matl/rCLAMPS/my_results/zf-C2H2_250_50_seedFFSdiverse6/0_logos_aligned_hoo/T094930_2.00_RDERRDHTRDER_51.pdf]

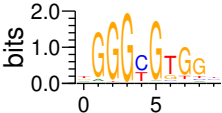

Supplement: SUPPLEMENTAL_Matl.zip [file T094932_2.00_KSHARDERRDHL_52.pdf › SUPPLEMENTAL_Matl/rCLAMPS/my_results/zf-C2H2_250_50_seedFFSdiverse6/0_logos_aligned_hoo/T094932_2.00_KSHARDERRDHL_52.pdf]

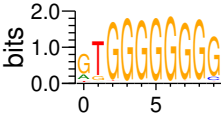

WebLogo 3.6.0

Supplement: SUPPLEMENTAL_Matl.zip [file T094940_2.00_SYHRQYHRRDRR_53.pdf › SUPPLEMENTAL_Matl/rCLAMPS/my_results/zf-C2H2_250_50_seedFFSdiverse6/0_logos_aligned_hoo/T094940_2.00_SYHRQYHRRDRR_53.pdf]

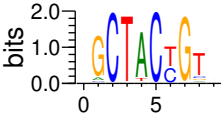

WebLogo 3.6.0

Supplement: SUPPLEMENTAL_Matl.zip [file T094954_2.00_KYNIRDHDQRTV_54.pdf › SUPPLEMENTAL_Matl/rCLAMPS/my_results/zf-C2H2_250_50_seedFFSdiverse6/0_logos_aligned_hoo/T094954_2.00_KYNIRDHDQRTV_54.pdf]

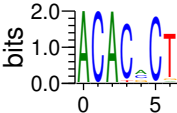

Supplement: SUPPLEMENTAL_Matl.zip [file T094977_2.00_WTHEHSVE_55.pdf › SUPPLEMENTAL_Matl/rCLAMPS/my_results/zf-C2H2_250_50_seedFFSdiverse6/0_logos_aligned_hoo/T094977_2.00_WTHEHSVE_55.pdf]

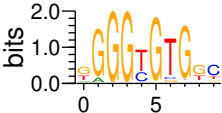

WebLogo 3.6.0

Supplement: SUPPLEMENTAL_Matl.zip [file T094987_2.00_KSHARDERRDHK_56.pdf › SUPPLEMENTAL_Matl/rCLAMPS/my_results/zf-C2H2_250_50_seedFFSdiverse6/0_logos_aligned_hoo/T094987_2.00_KSHARDERRDHK_56.pdf]

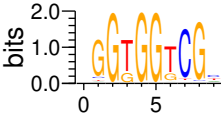

WebLogo 3.6.0

Supplement: SUPPLEMENTAL_Matl.zip [file T095006_2.00_RDKIHYDNKDHR_57.pdf › SUPPLEMENTAL_Matl/rCLAMPS/my_results/zf-C2H2_250_50_seedFFSdiverse6/0_logos_aligned_hoo/T095006_2.00_RDKIHYDNKDHR_57.pdf]

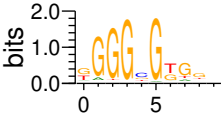

WebLogo 3.6.0

Supplement: SUPPLEMENTAL_Matl.zip [file T095022_2.00_KSHARDERRDHK_58.pdf › SUPPLEMENTAL_Matl/rCLAMPS/my_results/zf-C2H2_250_50_seedFFSdiverse6/0_logos_aligned_hoo/T095022_2.00_KSHARDERRDHK_58.pdf]

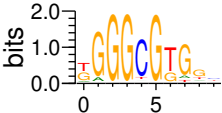

Supplement: SUPPLEMENTAL_Matl.zip [file T095027_2.00_KSHARDERRDHK_59.pdf › SUPPLEMENTAL_Matl/rCLAMPS/my_results/zf-C2H2_250_50_seedFFSdiverse6/0_logos_aligned_hoo/T095027_2.00_KSHARDERRDHK_59.pdf]

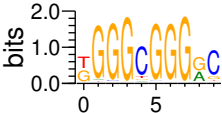

WebLogo 3.6.0

Supplement: SUPPLEMENTAL_Matl.zip [file T095047_2.00_KSLARDERRDHK_60.pdf › SUPPLEMENTAL_Matl/rCLAMPS/my_results/zf-C2H2_250_50_seedFFSdiverse6/0_logos_aligned_hoo/T095047_2.00_KSLARDERRDHK_60.pdf]

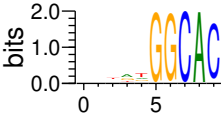

WebLogo 3.6.0

Supplement: SUPPLEMENTAL_Matl.zip [file T095075_2.00_HSQRMHHGWDSR_61.pdf › SUPPLEMENTAL_Matl/rCLAMPS/my_results/zf-C2H2_250_50_seedFFSdiverse6/0_logos_aligned_hoo/T095075_2.00_HSQRMHHGWDSR_61.pdf]

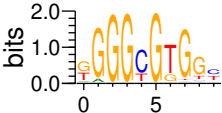

WebLogo 3.6.0

Supplement: SUPPLEMENTAL_Matl.zip [file T095080_2.00_KSHARDERRDHK_62.pdf › SUPPLEMENTAL_Matl/rCLAMPS/my_results/zf-C2H2_250_50_seedFFSdiverse6/0_logos_aligned_hoo/T095080_2.00_KSHARDERRDHK_62.pdf]

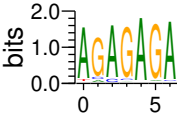

Supplement: SUPPLEMENTAL_Matl.zip [file T095087_2.00_HSDRQQHQ_63.pdf › SUPPLEMENTAL_Matl/rCLAMPS/my_results/zf-C2H2_250_50_seedFFSdiverse6/0_logos_aligned_hoo/T095087_2.00_HSDRQQHQ_63.pdf]

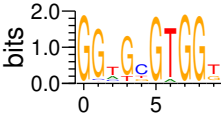

WebLogo 3.6.0

Supplement: SUPPLEMENTAL_Matl.zip [file T095111_2.00_KSHSRDERRDHQ_64.pdf › SUPPLEMENTAL_Matl/rCLAMPS/my_results/zf-C2H2_250_50_seedFFSdiverse6/0_logos_aligned_hoo/T095111_2.00_KSHSRDERRDHQ_64.pdf]

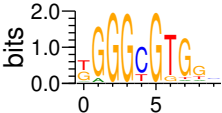

WebLogo 3.6.0

Supplement: SUPPLEMENTAL_Matl.zip [file T095116_2.00_KSHARDERRDHK_65.pdf › SUPPLEMENTAL_Matl/rCLAMPS/my_results/zf-C2H2_250_50_seedFFSdiverse6/0_logos_aligned_hoo/T095116_2.00_KSHARDERRDHK_65.pdf]

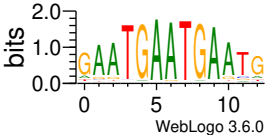

Supplement: SUPPLEMENTAL_Matl.zip [file T095119_2.00_QSALRSIQQSGNQSNR_66.pdf › SUPPLEMENTAL_Matl/rCLAMPS/my_results/zf-C2H2_250_50_seedFFSdiverse6/0_logos_aligned_hoo/T095119_2.00_QSALRSIQQSGNQSNR_66.pdf]

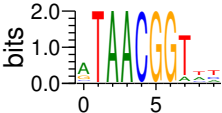

Supplement: SUPPLEMENTAL_Matl.zip [file T095121_2.00_YRMRDFDRQCSS_67.pdf › SUPPLEMENTAL_Matl/rCLAMPS/my_results/zf-C2H2_250_50_seedFFSdiverse6/0_logos_aligned_hoo/T095121_2.00_YRMRDFDRQCSS_67.pdf]

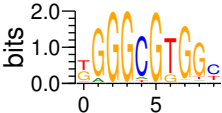

WebLogo 3.6.0

Supplement: SUPPLEMENTAL_Matl.zip [file T095122_2.00_KSHARDERRDHK_68.pdf › SUPPLEMENTAL_Matl/rCLAMPS/my_results/zf-C2H2_250_50_seedFFSdiverse6/0_logos_aligned_hoo/T095122_2.00_KSHARDERRDHK_68.pdf]

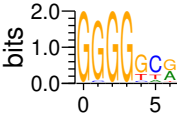

WebLogo 3.6.0

Supplement: SUPPLEMENTAL_Matl.zip [file T095129_2.00_SGARSPGR_69.pdf › SUPPLEMENTAL_Matl/rCLAMPS/my_results/zf-C2H2_250_50_seedFFSdiverse6/0_logos_aligned_hoo/T095129_2.00_SGARSPGR_69.pdf]

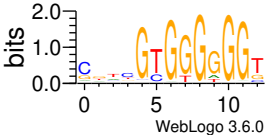

Supplement: SUPPLEMENTAL_Matl.zip [file T095134_2.00_AYKIRENINSDKDSSK_70.pdf › SUPPLEMENTAL_Matl/rCLAMPS/my_results/zf-C2H2_250_50_seedFFSdiverse6/0_logos_aligned_hoo/T095134_2.00_AYKIRENINSDKDSSK_70.pdf]

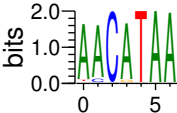

Supplement: SUPPLEMENTAL_Matl.zip [file T095156_2.00_LEYKNQFS_71.pdf › SUPPLEMENTAL_Matl/rCLAMPS/my_results/zf-C2H2_250_50_seedFFSdiverse6/0_logos_aligned_hoo/T095156_2.00_LEYKNQFS_71.pdf]

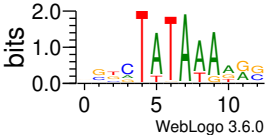

Supplement: SUPPLEMENTAL_Matl.zip [file T095163_2.00_YSFRYLHKRSSTKSGK_72.pdf › SUPPLEMENTAL_Matl/rCLAMPS/my_results/zf-C2H2_250_50_seedFFSdiverse6/0_logos_aligned_hoo/T095163_2.00_YSFRYLHKRSSTKSGK_72.pdf]

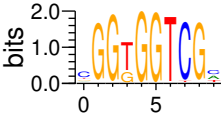

WebLogo 3.6.0

Supplement: SUPPLEMENTAL_Matl.zip [file T095173_2.00_RDKVHYDNRDHR_73.pdf › SUPPLEMENTAL_Matl/rCLAMPS/my_results/zf-C2H2_250_50_seedFFSdiverse6/0_logos_aligned_hoo/T095173_2.00_RDKVHYDNRDHR_73.pdf]

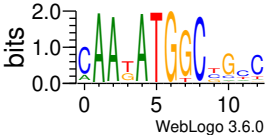

Supplement: SUPPLEMENTAL_Matl.zip [file T095174_2.00_NAAKESKRLFNTQNNA_74.pdf › SUPPLEMENTAL_Matl/rCLAMPS/my_results/zf-C2H2_250_50_seedFFSdiverse6/0_logos_aligned_hoo/T095174_2.00_NAAKESKRLFNTQNNA_74.pdf]

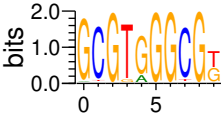

WebLogo 3.6.0

Supplement: SUPPLEMENTAL_Matl.zip [file T095176_2.00_RDERRDHTRDER_75.pdf › SUPPLEMENTAL_Matl/rCLAMPS/my_results/zf-C2H2_250_50_seedFFSdiverse6/0_logos_aligned_hoo/T095176_2.00_RDERRDHTRDER_75.pdf]

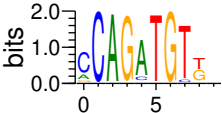

WebLogo 3.6.0

Supplement: SUPPLEMENTAL_Matl.zip [file T095177_2.00_CYTRYHNRQGDR_76.pdf › SUPPLEMENTAL_Matl/rCLAMPS/my_results/zf-C2H2_250_50_seedFFSdiverse6/0_logos_aligned_hoo/T095177_2.00_CYTRYHNRQGDR_76.pdf]

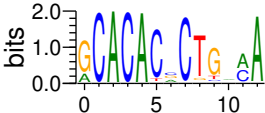

WebLogo 3.6.0

Supplement: SUPPLEMENTAL_Matl.zip [file T095190_2.00_YCHAQSDVHTNSQSTR_77.pdf › SUPPLEMENTAL_Matl/rCLAMPS/my_results/zf-C2H2_250_50_seedFFSdiverse6/0_logos_aligned_hoo/T095190_2.00_YCHAQSDVHTNSQSTR_77.pdf]

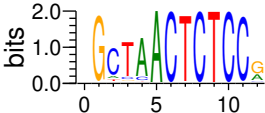

Supplement: SUPPLEMENTAL_Matl.zip [file T095203_2.00_HTDRHSDKCSNKYSCR_78.pdf › SUPPLEMENTAL_Matl/rCLAMPS/my_results/zf-C2H2_250_50_seedFFSdiverse6/0_logos_aligned_hoo/T095203_2.00_HTDRHSDKCSNKYSCR_78.pdf]

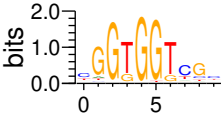

WebLogo 3.6.0

Supplement: SUPPLEMENTAL_Matl.zip [file T095225_2.00_RDKIHYDNRDHR_79.pdf › SUPPLEMENTAL_Matl/rCLAMPS/my_results/zf-C2H2_250_50_seedFFSdiverse6/0_logos_aligned_hoo/T095225_2.00_RDKIHYDNRDHR_79.pdf]

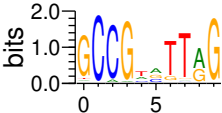

WebLogo 3.6.0

Supplement: SUPPLEMENTAL_Matl.zip [file T095232_2.00_QGSRRDQYFAIQ_80.pdf › SUPPLEMENTAL_Matl/rCLAMPS/my_results/zf-C2H2_250_50_seedFFSdiverse6/0_logos_aligned_hoo/T095232_2.00_QGSRRDQYFAIQ_80.pdf]

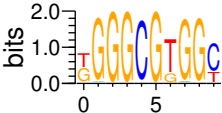

WebLogo 3.6.0

Supplement: SUPPLEMENTAL_Matl.zip [file T095233_2.00_KSHARDERRDHK_81.pdf › SUPPLEMENTAL_Matl/rCLAMPS/my_results/zf-C2H2_250_50_seedFFSdiverse6/0_logos_aligned_hoo/T095233_2.00_KSHARDERRDHK_81.pdf]

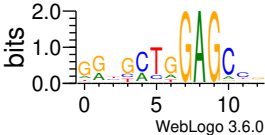

Supplement: SUPPLEMENTAL_Matl.zip [file T095243_2.00_HENRQKNRASTDHSAK_82.pdf › SUPPLEMENTAL_Matl/rCLAMPS/my_results/zf-C2H2_250_50_seedFFSdiverse6/0_logos_aligned_hoo/T095243_2.00_HENRQKNRASTDHSAK_82.pdf]

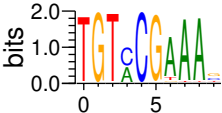

WebLogo 3.6.0

Supplement: SUPPLEMENTAL_Matl.zip [file T095250_2.00_QSALRAIQQSNR_83.pdf › SUPPLEMENTAL_Matl/rCLAMPS/my_results/zf-C2H2_250_50_seedFFSdiverse6/0_logos_aligned_hoo/T095250_2.00_QSALRAIQQSNR_83.pdf]

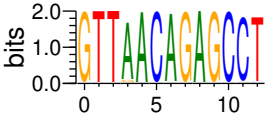

Supplement: SUPPLEMENTAL_Matl.zip [file T095320_2.00_HSDKQSHGGTGQVSAR_84.pdf › SUPPLEMENTAL_Matl/rCLAMPS/my_results/zf-C2H2_250_50_seedFFSdiverse6/0_logos_aligned_hoo/T095320_2.00_HSDKQSHGGTGQVSAR_84.pdf]

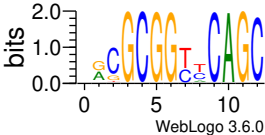

Supplement: SUPPLEMENTAL_Matl.zip [file T095409_2.00_GEKFHSNRQSTDHPAR_85.pdf › SUPPLEMENTAL_Matl/rCLAMPS/my_results/zf-C2H2_250_50_seedFFSdiverse6/0_logos_aligned_hoo/T095409_2.00_GEKFHSNRQSTDHPAR_85.pdf]

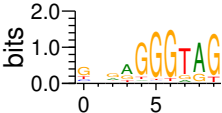

WebLogo 3.6.0

Supplement: SUPPLEMENTAL_Matl.zip [file T095424_2.00_SLRSRSHRDAEQ_86.pdf › SUPPLEMENTAL_Matl/rCLAMPS/my_results/zf-C2H2_250_50_seedFFSdiverse6/0_logos_aligned_hoo/T095424_2.00_SLRSRSHRDAEQ_86.pdf]

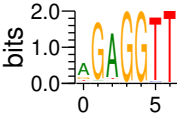

WebLogo 3.6.0

Supplement: SUPPLEMENTAL_Matl.zip [file T095441_2.00_NFHRQSHR_87.pdf › SUPPLEMENTAL_Matl/rCLAMPS/my_results/zf-C2H2_250_50_seedFFSdiverse6/0_logos_aligned_hoo/T095441_2.00_NFHRQSHR_87.pdf]

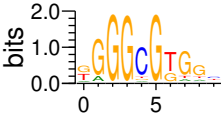

WebLogo 3.6.0

Supplement: SUPPLEMENTAL_Matl.zip [file T095444_2.00_KSHARDERRDHK_88.pdf › SUPPLEMENTAL_Matl/rCLAMPS/my_results/zf-C2H2_250_50_seedFFSdiverse6/0_logos_aligned_hoo/T095444_2.00_KSHARDERRDHK_88.pdf]

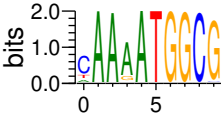

Supplement: SUPPLEMENTAL_Matl.zip [file T095455_2.00_ESKRLFNTQTNT_89.pdf › SUPPLEMENTAL_Matl/rCLAMPS/my_results/zf-C2H2_250_50_seedFFSdiverse6/0_logos_aligned_hoo/T095455_2.00_ESKRLFNTQTNT_89.pdf]

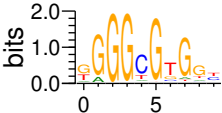

WebLogo 3.6.0

Supplement: SUPPLEMENTAL_Matl.zip [file T095489_2.00_KSHSRDERRDHK_90.pdf › SUPPLEMENTAL_Matl/rCLAMPS/my_results/zf-C2H2_250_50_seedFFSdiverse6/0_logos_aligned_hoo/T095489_2.00_KSHSRDERRDHK_90.pdf]

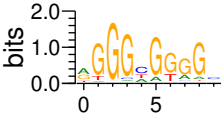

WebLogo 3.6.0

Supplement: SUPPLEMENTAL_Matl.zip [file T100966_2.00_KSHARDERRDHL_91.pdf › SUPPLEMENTAL_Matl/rCLAMPS/my_results/zf-C2H2_250_50_seedFFSdiverse6/0_logos_aligned_hoo/T100966_2.00_KSHARDERRDHL_91.pdf]

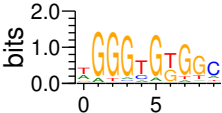

WebLogo 3.6.0

Supplement: SUPPLEMENTAL_Matl.zip [file T100977_2.00_KSHARDERRDHL_92.pdf › SUPPLEMENTAL_Matl/rCLAMPS/my_results/zf-C2H2_250_50_seedFFSdiverse6/0_logos_aligned_hoo/T100977_2.00_KSHARDERRDHL_92.pdf]

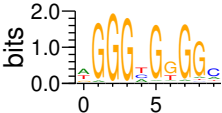

Supplement: SUPPLEMENTAL_Matl.zip [file T100982_2.00_KSHARDERRDHL_93.pdf › SUPPLEMENTAL_Matl/rCLAMPS/my_results/zf-C2H2_250_50_seedFFSdiverse6/0_logos_aligned_hoo/T100982_2.00_KSHARDERRDHL_93.pdf]

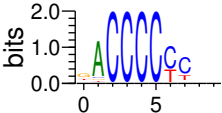

WebLogo 3.6.0

Supplement: SUPPLEMENTAL_Matl.zip [file T100997_2.00_RENINSDKDSSK_94.pdf › SUPPLEMENTAL_Matl/rCLAMPS/my_results/zf-C2H2_250_50_seedFFSdiverse6/0_logos_aligned_hoo/T100997_2.00_RENINSDKDSSK_94.pdf]

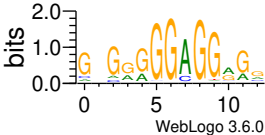

Supplement: SUPPLEMENTAL_Matl.zip [file T100999_2.00_KSHMRDQRRDHTRDER_95.pdf › SUPPLEMENTAL_Matl/rCLAMPS/my_results/zf-C2H2_250_50_seedFFSdiverse6/0_logos_aligned_hoo/T100999_2.00_KSHMRDQRRDHTRDER_95.pdf]

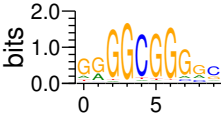

WebLogo 3.6.0

Supplement: SUPPLEMENTAL_Matl.zip [file T101006_2.00_KSLARDERRDHK_96.pdf › SUPPLEMENTAL_Matl/rCLAMPS/my_results/zf-C2H2_250_50_seedFFSdiverse6/0_logos_aligned_hoo/T101006_2.00_KSLARDERRDHK_96.pdf]

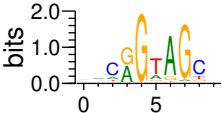

WebLogo 3.6.0

Supplement: SUPPLEMENTAL_Matl.zip [file T101029_2.00_KYNIRDHDQRTV_97.pdf › SUPPLEMENTAL_Matl/rCLAMPS/my_results/zf-C2H2_250_50_seedFFSdiverse6/0_logos_aligned_hoo/T101029_2.00_KYNIRDHDQRTV_97.pdf]

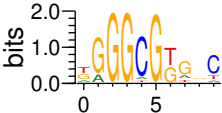

Supplement: SUPPLEMENTAL_Matl.zip [file T101053_2.00_KSHARDERRDHK_98.pdf › SUPPLEMENTAL_Matl/rCLAMPS/my_results/zf-C2H2_250_50_seedFFSdiverse6/0_logos_aligned_hoo/T101053_2.00_KSHARDERRDHK_98.pdf]

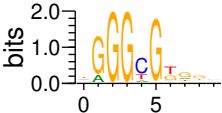

Supplement: SUPPLEMENTAL_Matl.zip [file T101059_2.00_KSHARDERRDHL_99.pdf › SUPPLEMENTAL_Matl/rCLAMPS/my_results/zf-C2H2_250_50_seedFFSdiverse6/0_logos_aligned_hoo/T101059_2.00_KSHARDERRDHL_99.pdf]

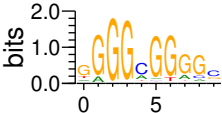

WebLogo 3.6.0

Supplement: SUPPLEMENTAL_Matl.zip [file T101064_2.00_KSHARDERRDHK_100.pdf › SUPPLEMENTAL_Matl/rCLAMPS/my_results/zf-C2H2_250_50_seedFFSdiverse6/0_logos_aligned_hoo/T101064_2.00_KSHARDERRDHK_100.pdf]

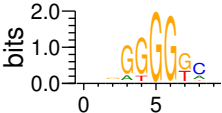

WebLogo 3.6.0

Supplement: SUPPLEMENTAL_Matl.zip [file T101071_2.00_RDKIHYDNKDHR_101.pdf › SUPPLEMENTAL_Matl/rCLAMPS/my_results/zf-C2H2_250_50_seedFFSdiverse6/0_logos_aligned_hoo/T101071_2.00_RDKIHYDNKDHR_101.pdf]

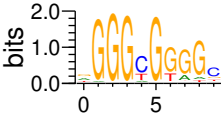

WebLogo 3.6.0

Supplement: SUPPLEMENTAL_Matl.zip [file T101081_2.00_KSHARDERRDHL_102.pdf › SUPPLEMENTAL_Matl/rCLAMPS/my_results/zf-C2H2_250_50_seedFFSdiverse6/0_logos_aligned_hoo/T101081_2.00_KSHARDERRDHL_102.pdf]

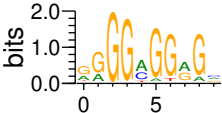

WebLogo 3.6.0

Supplement: SUPPLEMENTAL_Matl.zip [file T101089_2.00_KSHARDERRDHK_103.pdf › SUPPLEMENTAL_Matl/rCLAMPS/my_results/zf-C2H2_250_50_seedFFSdiverse6/0_logos_aligned_hoo/T101089_2.00_KSHARDERRDHK_103.pdf]

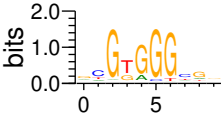

WebLogo 3.6.0

Supplement: SUPPLEMENTAL_Matl.zip [file T101113_2.00_RDERRDHTRDER_104.pdf › SUPPLEMENTAL_Matl/rCLAMPS/my_results/zf-C2H2_250_50_seedFFSdiverse6/0_logos_aligned_hoo/T101113_2.00_RDERRDHTRDER_104.pdf]

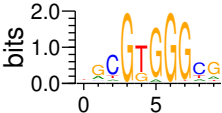

Supplement: SUPPLEMENTAL_Matl.zip [file T101144_2.00_RDERRDHTRDER_105.pdf › SUPPLEMENTAL_Matl/rCLAMPS/my_results/zf-C2H2_250_50_seedFFSdiverse6/0_logos_aligned_hoo/T101144_2.00_RDERRDHTRDER_105.pdf]

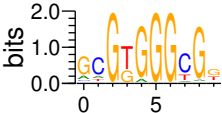

WebLogo 3.6.0

Supplement: SUPPLEMENTAL_Matl.zip [file T101147_2.00_RDERRDHTRDER_106.pdf › SUPPLEMENTAL_Matl/rCLAMPS/my_results/zf-C2H2_250_50_seedFFSdiverse6/0_logos_aligned_hoo/T101147_2.00_RDERRDHTRDER_106.pdf]
