# Supplementary figures and images for: Learning probabilistic protein–DNA recognition codes from DNA-binding specificities using structural mappings (part 3 of 25)
Source: HighWire-hosted journal article supplement (doi:10.1101/gr.276606.122), 2022-09-01

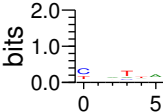

WebLogo 3.6.0

Supplement: SUPPLEMENTAL_Matl.zip [file CG34031_RKPRTQNTK_146.pdf › SUPPLEMENTAL_Matl/rCLAMPS/STAMP/alignedLogos_NoyesGrps/logos_1/CG34031_RKPRTQNTK_146.pdf]

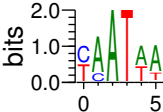

Supplement: SUPPLEMENTAL_Matl.zip [file CG4328_KRPRVQNAK.pdf › SUPPLEMENTAL_Matl/rCLAMPS/STAMP/alignedLogos_NoyesGrps/logos_1/CG4328_KRPRVQNAK.pdf]



Supplement: SUPPLEMENTAL_Matl.zip [file CG4328_KRPRVQNAK_147.pdf › SUPPLEMENTAL_Matl/rCLAMPS/STAMP/alignedLogos_NoyesGrps/logos_1/CG4328_KRPRVQNAK_147.pdf]

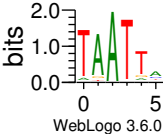

Supplement: SUPPLEMENTAL_Matl.zip [file CG5369_RRSRVQNAK.pdf › SUPPLEMENTAL_Matl/rCLAMPS/STAMP/alignedLogos_NoyesGrps/logos_1/CG5369_RRSRVQNAK.pdf]



Supplement: SUPPLEMENTAL_Matl.zip [file CG5369_RRSRVQNAK_148.pdf › SUPPLEMENTAL_Matl/rCLAMPS/STAMP/alignedLogos_NoyesGrps/logos_1/CG5369_RRSRVQNAK_148.pdf]

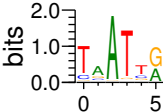

Supplement: SUPPLEMENTAL_Matl.zip [file CG9876_RRNRVQNAK.pdf › SUPPLEMENTAL_Matl/rCLAMPS/STAMP/alignedLogos_NoyesGrps/logos_1/CG9876_RRNRVQNAK.pdf]

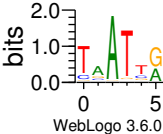

Supplement: SUPPLEMENTAL_Matl.zip [file CG9876_RRNRVQNAK_149.pdf › SUPPLEMENTAL_Matl/rCLAMPS/STAMP/alignedLogos_NoyesGrps/logos_1/CG9876_RRNRVQNAK_149.pdf]

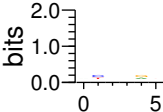

WebLogo 3.6.0

Supplement: SUPPLEMENTAL_Matl.zip [file CIMG_06089_IGKLTANRR_150.pdf › SUPPLEMENTAL_Matl/rCLAMPS/STAMP/alignedLogos_NoyesGrps/logos_1/CIMG_06089_IGKLTANRR_150.pdf]

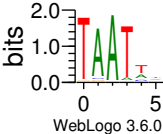

Supplement: SUPPLEMENTAL_Matl.zip [file CNG03450_KSPRIQNRA.pdf › SUPPLEMENTAL_Matl/rCLAMPS/STAMP/alignedLogos_NoyesGrps/logos_1/CNG03450_KSPRIQNRA.pdf]



Supplement: SUPPLEMENTAL_Matl.zip [file CNG03450_KSPRIQNRA_151.pdf › SUPPLEMENTAL_Matl/rCLAMPS/STAMP/alignedLogos_NoyesGrps/logos_1/CNG03450_KSPRIQNRA_151.pdf]

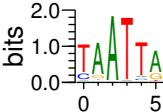

WebLogo 3.6.0

Supplement: SUPPLEMENTAL_Matl.zip [file CNK00090_KLPRIQNSK.pdf › SUPPLEMENTAL_Matl/rCLAMPS/STAMP/alignedLogos_NoyesGrps/logos_1/CNK00090_KLPRIQNSK.pdf]



WebLogo 3.6.0

Supplement: SUPPLEMENTAL_Matl.zip [file CNK00090_KLPRIQNSK_152.pdf › SUPPLEMENTAL_Matl/rCLAMPS/STAMP/alignedLogos_NoyesGrps/logos_1/CNK00090_KLPRIQNSK_152.pdf]

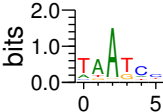

WebLogo 3.6.0

Supplement: SUPPLEMENTAL_Matl.zip [file CRX_RRERVKNAK.pdf › SUPPLEMENTAL_Matl/rCLAMPS/STAMP/alignedLogos_NoyesGrps/logos_1/CRX_RRERVKNAK.pdf]

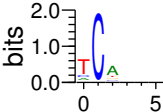

WebLogo 3.6.0

Supplement: SUPPLEMENTAL_Matl.zip [file CUP9_SGRRNINRR.pdf › SUPPLEMENTAL_Matl/rCLAMPS/STAMP/alignedLogos_NoyesGrps/logos_1/CUP9_SGRRNINRR.pdf]

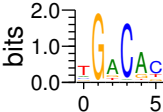

WebLogo 3.6.0

Supplement: SUPPLEMENTAL_Matl.zip [file CUP9_SGRRNINRR_153.pdf › SUPPLEMENTAL_Matl/rCLAMPS/STAMP/alignedLogos_NoyesGrps/logos_1/CUP9_SGRRNINRR_153.pdf]

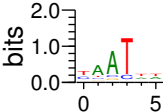

WebLogo 3.6.0

Supplement: SUPPLEMENTAL_Matl.zip [file CaO19.4000_GQKRIQNAK_154.pdf › SUPPLEMENTAL_Matl/rCLAMPS/STAMP/alignedLogos_NoyesGrps/logos_1/CaO19.4000_GQKRIQNAK_154.pdf]

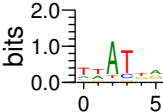

WebLogo 3.6.0

Supplement: SUPPLEMENTAL_Matl.zip [file Cdx1_DKYRIQNAK_155.pdf › SUPPLEMENTAL_Matl/rCLAMPS/STAMP/alignedLogos_NoyesGrps/logos_1/Cdx1_DKYRIQNAK_155.pdf]

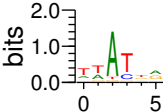

WebLogo 3.6.0

Supplement: SUPPLEMENTAL_Matl.zip [file Cdx2_DKYRIQNAK_156.pdf › SUPPLEMENTAL_Matl/rCLAMPS/STAMP/alignedLogos_NoyesGrps/logos_1/Cdx2_DKYRIQNAK_156.pdf]

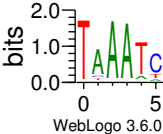

Supplement: SUPPLEMENTAL_Matl.zip [file Cdx4_EKYRIQNAK_157.pdf › SUPPLEMENTAL_Matl/rCLAMPS/STAMP/alignedLogos_NoyesGrps/logos_1/Cdx4_EKYRIQNAK_157.pdf]

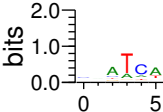

WebLogo 3.6.0

Supplement: SUPPLEMENTAL_Matl.zip [file Cphx1_SKPRNQNAR.pdf › SUPPLEMENTAL_Matl/rCLAMPS/STAMP/alignedLogos_NoyesGrps/logos_1/Cphx1_SKPRNQNAR.pdf]



WebLogo 3.6.0

Supplement: SUPPLEMENTAL_Matl.zip [file Cphx1_SKPRNQNAR_158.pdf › SUPPLEMENTAL_Matl/rCLAMPS/STAMP/alignedLogos_NoyesGrps/logos_1/Cphx1_SKPRNQNAR_158.pdf]

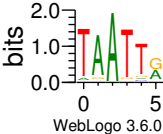

Supplement: SUPPLEMENTAL_Matl.zip [file DLX1_RKPRIQNSK.pdf › SUPPLEMENTAL_Matl/rCLAMPS/STAMP/alignedLogos_NoyesGrps/logos_1/DLX1_RKPRIQNSK.pdf]

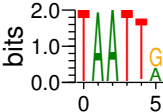

WebLogo 3.6.0

Supplement: SUPPLEMENTAL_Matl.zip [file DLX1_RKPRIQNSK_159.pdf › SUPPLEMENTAL_Matl/rCLAMPS/STAMP/alignedLogos_NoyesGrps/logos_1/DLX1_RKPRIQNSK_159.pdf]

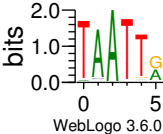

Supplement: SUPPLEMENTAL_Matl.zip [file DLX2_RKPRIQNSK.pdf › SUPPLEMENTAL_Matl/rCLAMPS/STAMP/alignedLogos_NoyesGrps/logos_1/DLX2_RKPRIQNSK.pdf]

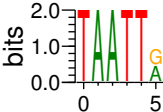

WebLogo 3.6.0

Supplement: SUPPLEMENTAL_Matl.zip [file DLX2_RKPRIQNSK_160.pdf › SUPPLEMENTAL_Matl/rCLAMPS/STAMP/alignedLogos_NoyesGrps/logos_1/DLX2_RKPRIQNSK_160.pdf]

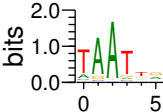

WebLogo 3.6.0

Supplement: SUPPLEMENTAL_Matl.zip [file DLX3_RKPRIQNSK.pdf › SUPPLEMENTAL_Matl/rCLAMPS/STAMP/alignedLogos_NoyesGrps/logos_1/DLX3_RKPRIQNSK.pdf]

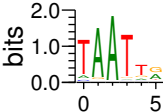

WebLogo 3.6.0

Supplement: SUPPLEMENTAL_Matl.zip [file DLX3_RKPRIQNSK_161.pdf › SUPPLEMENTAL_Matl/rCLAMPS/STAMP/alignedLogos_NoyesGrps/logos_1/DLX3_RKPRIQNSK_161.pdf]

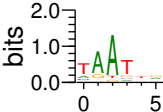

WebLogo 3.6.0

Supplement: SUPPLEMENTAL_Matl.zip [file DLX4_RKPRIQNSK.pdf › SUPPLEMENTAL_Matl/rCLAMPS/STAMP/alignedLogos_NoyesGrps/logos_1/DLX4_RKPRIQNSK.pdf]

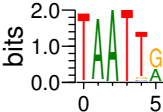

WebLogo 3.6.0

Supplement: SUPPLEMENTAL_Matl.zip [file DLX4_RKPRIQNSK_162.pdf › SUPPLEMENTAL_Matl/rCLAMPS/STAMP/alignedLogos_NoyesGrps/logos_1/DLX4_RKPRIQNSK_162.pdf]

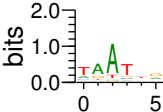

WebLogo 3.6.0

Supplement: SUPPLEMENTAL_Matl.zip [file DLX5_RKPRIQNSK.pdf › SUPPLEMENTAL_Matl/rCLAMPS/STAMP/alignedLogos_NoyesGrps/logos_1/DLX5_RKPRIQNSK.pdf]

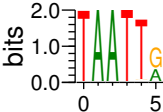

WebLogo 3.6.0

Supplement: SUPPLEMENTAL_Matl.zip [file DLX5_RKPRIQNSK_163.pdf › SUPPLEMENTAL_Matl/rCLAMPS/STAMP/alignedLogos_NoyesGrps/logos_1/DLX5_RKPRIQNSK_163.pdf]

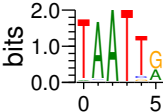

Supplement: SUPPLEMENTAL_Matl.zip [file DLX6_RKPRIQNSK.pdf › SUPPLEMENTAL_Matl/rCLAMPS/STAMP/alignedLogos_NoyesGrps/logos_1/DLX6_RKPRIQNSK.pdf]

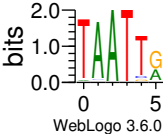

Supplement: SUPPLEMENTAL_Matl.zip [file DLX6_RKPRIQNSK_164.pdf › SUPPLEMENTAL_Matl/rCLAMPS/STAMP/alignedLogos_NoyesGrps/logos_1/DLX6_RKPRIQNSK_164.pdf]

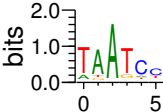

WebLogo 3.6.0

Supplement: SUPPLEMENTAL_Matl.zip [file DMBX1_RRSRVKNAK.pdf › SUPPLEMENTAL_Matl/rCLAMPS/STAMP/alignedLogos_NoyesGrps/logos_1/DMBX1_RRSRVKNAK.pdf]

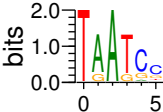

WebLogo 3.6.0

Supplement: SUPPLEMENTAL_Matl.zip [file DMBX1_RRSRVKNAK_165.pdf › SUPPLEMENTAL_Matl/rCLAMPS/STAMP/alignedLogos_NoyesGrps/logos_1/DMBX1_RRSRVKNAK_165.pdf]

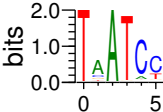

WebLogo 3.6.0

Supplement: SUPPLEMENTAL_Matl.zip [file DPRX_HRKRVKNAK.pdf › SUPPLEMENTAL_Matl/rCLAMPS/STAMP/alignedLogos_NoyesGrps/logos_1/DPRX_HRKRVKNAK.pdf]



WebLogo 3.6.0

Supplement: SUPPLEMENTAL_Matl.zip [file DPRX_HRKRVKNAK_166.pdf › SUPPLEMENTAL_Matl/rCLAMPS/STAMP/alignedLogos_NoyesGrps/logos_1/DPRX_HRKRVKNAK_166.pdf]

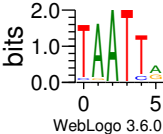

Supplement: SUPPLEMENTAL_Matl.zip [file DRGX_RRNRVQNAK.pdf › SUPPLEMENTAL_Matl/rCLAMPS/STAMP/alignedLogos_NoyesGrps/logos_1/DRGX_RRNRVQNAK.pdf]



Supplement: SUPPLEMENTAL_Matl.zip [file DRGX_RRNRVQNAK_167.pdf › SUPPLEMENTAL_Matl/rCLAMPS/STAMP/alignedLogos_NoyesGrps/logos_1/DRGX_RRNRVQNAK_167.pdf]

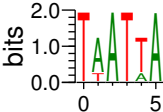

WebLogo 3.6.0

Supplement: SUPPLEMENTAL_Matl.zip [file Dbx1_MLRRIQNMK_169.pdf › SUPPLEMENTAL_Matl/rCLAMPS/STAMP/alignedLogos_NoyesGrps/logos_1/Dbx1_MLRRIQNMK_169.pdf]

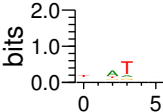

WebLogo 3.6.0

Supplement: SUPPLEMENTAL_Matl.zip [file Dbx2_ILRRIQNMK_170.pdf › SUPPLEMENTAL_Matl/rCLAMPS/STAMP/alignedLogos_NoyesGrps/logos_1/Dbx2_ILRRIQNMK_170.pdf]

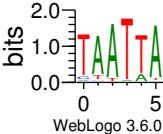

Supplement: SUPPLEMENTAL_Matl.zip [file Dbx_MMRRIQNMK_168.pdf › SUPPLEMENTAL_Matl/rCLAMPS/STAMP/alignedLogos_NoyesGrps/logos_1/Dbx_MMRRIQNMK_168.pdf]

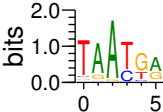

WebLogo 3.6.0

Supplement: SUPPLEMENTAL_Matl.zip [file Dfd_KRQRIQNMK.pdf › SUPPLEMENTAL_Matl/rCLAMPS/STAMP/alignedLogos_NoyesGrps/logos_1/Dfd_KRQRIQNMK.pdf]



Supplement: SUPPLEMENTAL_Matl.zip [file Dfd_KRQRIQNMK_171.pdf › SUPPLEMENTAL_Matl/rCLAMPS/STAMP/alignedLogos_NoyesGrps/logos_1/Dfd_KRQRIQNMK_171.pdf]

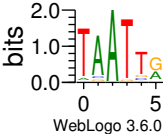

Supplement: SUPPLEMENTAL_Matl.zip [file Dll_RKPRIQNSK.pdf › SUPPLEMENTAL_Matl/rCLAMPS/STAMP/alignedLogos_NoyesGrps/logos_1/Dll_RKPRIQNSK.pdf]



Supplement: SUPPLEMENTAL_Matl.zip [file Dll_RKPRIQNSK_172.pdf › SUPPLEMENTAL_Matl/rCLAMPS/STAMP/alignedLogos_NoyesGrps/logos_1/Dll_RKPRIQNSK_172.pdf]



Supplement: SUPPLEMENTAL_Matl.zip [file Dlx1_RKPRIQNSK_173.pdf › SUPPLEMENTAL_Matl/rCLAMPS/STAMP/alignedLogos_NoyesGrps/logos_1/Dlx1_RKPRIQNSK_173.pdf]



Supplement: SUPPLEMENTAL_Matl.zip [file Dlx2_RKPRIQNSK_174.pdf › SUPPLEMENTAL_Matl/rCLAMPS/STAMP/alignedLogos_NoyesGrps/logos_1/Dlx2_RKPRIQNSK_174.pdf]



WebLogo 3.6.0

Supplement: SUPPLEMENTAL_Matl.zip [file Dlx3_RKPRIQNSK_175.pdf › SUPPLEMENTAL_Matl/rCLAMPS/STAMP/alignedLogos_NoyesGrps/logos_1/Dlx3_RKPRIQNSK_175.pdf]



WebLogo 3.6.0

Supplement: SUPPLEMENTAL_Matl.zip [file Dlx4_RKPRIQNSK_176.pdf › SUPPLEMENTAL_Matl/rCLAMPS/STAMP/alignedLogos_NoyesGrps/logos_1/Dlx4_RKPRIQNSK_176.pdf]



WebLogo 3.6.0

Supplement: SUPPLEMENTAL_Matl.zip [file Dlx5_RKPRIQNSK_177.pdf › SUPPLEMENTAL_Matl/rCLAMPS/STAMP/alignedLogos_NoyesGrps/logos_1/Dlx5_RKPRIQNSK_177.pdf]



WebLogo 3.6.0

Supplement: SUPPLEMENTAL_Matl.zip [file Dmbx1_RRSRVKNAK_178.pdf › SUPPLEMENTAL_Matl/rCLAMPS/STAMP/alignedLogos_NoyesGrps/logos_1/Dmbx1_RRSRVKNAK_178.pdf]

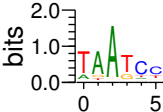

WebLogo 3.6.0

Supplement: SUPPLEMENTAL_Matl.zip [file Dobox5_CONSTRUCT_RKQHINLIK.pdf › SUPPLEMENTAL_Matl/rCLAMPS/STAMP/alignedLogos_NoyesGrps/logos_1/Dobox5_CONSTRUCT_RKQHINLIK.pdf]



WebLogo 3.6.0

Supplement: SUPPLEMENTAL_Matl.zip [file Dobox5_CONSTRUCT_RKQHINLIK_179.pdf › SUPPLEMENTAL_Matl/rCLAMPS/STAMP/alignedLogos_NoyesGrps/logos_1/Dobox5_CONSTRUCT_RKQHINLIK_179.pdf]

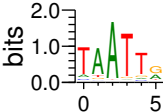

WebLogo 3.6.0

Supplement: SUPPLEMENTAL_Matl.zip [file Dr_RKPRIQNAK.pdf › SUPPLEMENTAL_Matl/rCLAMPS/STAMP/alignedLogos_NoyesGrps/logos_1/Dr_RKPRIQNAK.pdf]

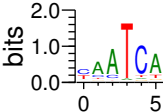

WebLogo 3.6.0

Supplement: SUPPLEMENTAL_Matl.zip [file Duxbl1_RRRRTQKKI.pdf › SUPPLEMENTAL_Matl/rCLAMPS/STAMP/alignedLogos_NoyesGrps/logos_1/Duxbl1_RRRRTQKKI.pdf]



WebLogo 3.6.0

Supplement: SUPPLEMENTAL_Matl.zip [file Duxbl1_RRRRTQKKI_180.pdf › SUPPLEMENTAL_Matl/rCLAMPS/STAMP/alignedLogos_NoyesGrps/logos_1/Duxbl1_RRRRTQKKI_180.pdf]

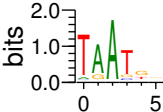

WebLogo 3.6.0

Supplement: SUPPLEMENTAL_Matl.zip [file E5_KRVRVQNTK.pdf › SUPPLEMENTAL_Matl/rCLAMPS/STAMP/alignedLogos_NoyesGrps/logos_1/E5_KRVRVQNTK.pdf]



WebLogo 3.6.0

Supplement: SUPPLEMENTAL_Matl.zip [file E5_KRVRVQNTK_181.pdf › SUPPLEMENTAL_Matl/rCLAMPS/STAMP/alignedLogos_NoyesGrps/logos_1/E5_KRVRVQNTK_181.pdf]

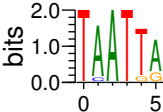

Supplement: SUPPLEMENTAL_Matl.zip [file EMX1_KRIRVQNTK.pdf › SUPPLEMENTAL_Matl/rCLAMPS/STAMP/alignedLogos_NoyesGrps/logos_1/EMX1_KRIRVQNTK.pdf]



Supplement: SUPPLEMENTAL_Matl.zip [file EMX1_KRIRVQNTK_182.pdf › SUPPLEMENTAL_Matl/rCLAMPS/STAMP/alignedLogos_NoyesGrps/logos_1/EMX1_KRIRVQNTK_182.pdf]

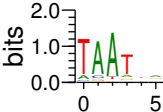

WebLogo 3.6.0

Supplement: SUPPLEMENTAL_Matl.zip [file EMX2_KRIRVQNTK.pdf › SUPPLEMENTAL_Matl/rCLAMPS/STAMP/alignedLogos_NoyesGrps/logos_1/EMX2_KRIRVQNTK.pdf]

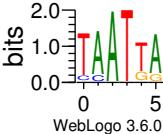

Supplement: SUPPLEMENTAL_Matl.zip [file EMX2_KRIRVQNTK_183.pdf › SUPPLEMENTAL_Matl/rCLAMPS/STAMP/alignedLogos_NoyesGrps/logos_1/EMX2_KRIRVQNTK_183.pdf]

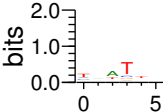

WebLogo 3.6.0

Supplement: SUPPLEMENTAL_Matl.zip [file EN1_KRPRIQNAK.pdf › SUPPLEMENTAL_Matl/rCLAMPS/STAMP/alignedLogos_NoyesGrps/logos_1/EN1_KRPRIQNAK.pdf]

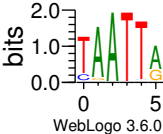

Supplement: SUPPLEMENTAL_Matl.zip [file EN1_KRPRIQNAK_184.pdf › SUPPLEMENTAL_Matl/rCLAMPS/STAMP/alignedLogos_NoyesGrps/logos_1/EN1_KRPRIQNAK_184.pdf]

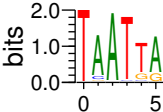

WebLogo 3.6.0

Supplement: SUPPLEMENTAL_Matl.zip [file EN2_KRPRIQNAK.pdf › SUPPLEMENTAL_Matl/rCLAMPS/STAMP/alignedLogos_NoyesGrps/logos_1/EN2_KRPRIQNAK.pdf]

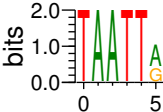

Supplement: SUPPLEMENTAL_Matl.zip [file EN2_KRPRIQNAK_185.pdf › SUPPLEMENTAL_Matl/rCLAMPS/STAMP/alignedLogos_NoyesGrps/logos_1/EN2_KRPRIQNAK_185.pdf]

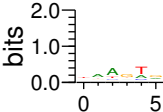

WebLogo 3.6.0

Supplement: SUPPLEMENTAL_Matl.zip [file ENSCING00000007395_KRTRIQNYK.pdf › SUPPLEMENTAL_Matl/rCLAMPS/STAMP/alignedLogos_NoyesGrps/logos_1/ENSCING00000007395_KRTRIQNYK.pdf]



Supplement: SUPPLEMENTAL_Matl.zip [file ENSCING00000007395_KRTRIQNYK_186.pdf › SUPPLEMENTAL_Matl/rCLAMPS/STAMP/alignedLogos_NoyesGrps/logos_1/ENSCING00000007395_KRTRIQNYK_186.pdf]

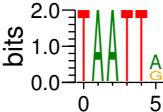

WebLogo 3.6.0

Supplement: SUPPLEMENTAL_Matl.zip [file ENSCING00000016045_RRSRIQNAK.pdf › SUPPLEMENTAL_Matl/rCLAMPS/STAMP/alignedLogos_NoyesGrps/logos_1/ENSCING00000016045_RRSRIQNAK.pdf]



WebLogo 3.6.0

Supplement: SUPPLEMENTAL_Matl.zip [file ENSCING00000016045_RRSRIQNAK_187.pdf › SUPPLEMENTAL_Matl/rCLAMPS/STAMP/alignedLogos_NoyesGrps/logos_1/ENSCING00000016045_RRSRIQNAK_187.pdf]

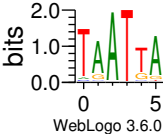

Supplement: SUPPLEMENTAL_Matl.zip [file ENSTNIG00000004116_KRQRVQNAR_188.pdf › SUPPLEMENTAL_Matl/rCLAMPS/STAMP/alignedLogos_NoyesGrps/logos_1/ENSTNIG00000004116_KRQRVQNAR_188.pdf]



Supplement: SUPPLEMENTAL_Matl.zip [file ENSTNIG00000004116_RSSRVQNQR.pdf › SUPPLEMENTAL_Matl/rCLAMPS/STAMP/alignedLogos_NoyesGrps/logos_1/ENSTNIG00000004116_RSSRVQNQR.pdf]

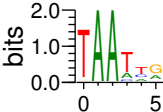

WebLogo 3.6.0

Supplement: SUPPLEMENTAL_Matl.zip [file ENSTNIG00000006040_RKARTQNTK.pdf › SUPPLEMENTAL_Matl/rCLAMPS/STAMP/alignedLogos_NoyesGrps/logos_1/ENSTNIG00000006040_RKARTQNTK.pdf]



WebLogo 3.6.0

Supplement: SUPPLEMENTAL_Matl.zip [file ENSTNIG00000006040_RKARTQNTK_189.pdf › SUPPLEMENTAL_Matl/rCLAMPS/STAMP/alignedLogos_NoyesGrps/logos_1/ENSTNIG00000006040_RKARTQNTK_189.pdf]

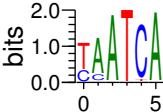

Supplement: SUPPLEMENTAL_Matl.zip [file ENSTNIG00000017092_RRKRVQNAR.pdf › SUPPLEMENTAL_Matl/rCLAMPS/STAMP/alignedLogos_NoyesGrps/logos_1/ENSTNIG00000017092_RRKRVQNAR.pdf]



Supplement: SUPPLEMENTAL_Matl.zip [file ENSTNIG00000017092_RRKRVQNAR_190.pdf › SUPPLEMENTAL_Matl/rCLAMPS/STAMP/alignedLogos_NoyesGrps/logos_1/ENSTNIG00000017092_RRKRVQNAR_190.pdf]

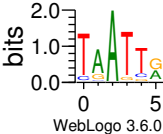

Supplement: SUPPLEMENTAL_Matl.zip [file ESX1_RRRRVQNAK.pdf › SUPPLEMENTAL_Matl/rCLAMPS/STAMP/alignedLogos_NoyesGrps/logos_1/ESX1_RRRRVQNAK.pdf]



Supplement: SUPPLEMENTAL_Matl.zip [file ESX1_RRRRVQNAK_191.pdf › SUPPLEMENTAL_Matl/rCLAMPS/STAMP/alignedLogos_NoyesGrps/logos_1/ESX1_RRRRVQNAK_191.pdf]

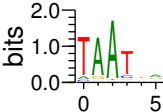

Supplement: SUPPLEMENTAL_Matl.zip [file EVX1_RRYRVQNMK.pdf › SUPPLEMENTAL_Matl/rCLAMPS/STAMP/alignedLogos_NoyesGrps/logos_1/EVX1_RRYRVQNMK.pdf]

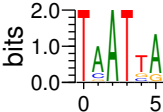

WebLogo 3.6.0

Supplement: SUPPLEMENTAL_Matl.zip [file EVX1_RRYRVQNMK_192.pdf › SUPPLEMENTAL_Matl/rCLAMPS/STAMP/alignedLogos_NoyesGrps/logos_1/EVX1_RRYRVQNMK_192.pdf]

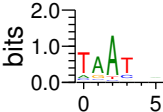

WebLogo 3.6.0

Supplement: SUPPLEMENTAL_Matl.zip [file EVX2_RRYRVQNMK.pdf › SUPPLEMENTAL_Matl/rCLAMPS/STAMP/alignedLogos_NoyesGrps/logos_1/EVX2_RRYRVQNMK.pdf]

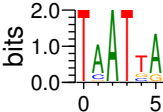

WebLogo 3.6.0

Supplement: SUPPLEMENTAL_Matl.zip [file EVX2_RRYRVQNMK_193.pdf › SUPPLEMENTAL_Matl/rCLAMPS/STAMP/alignedLogos_NoyesGrps/logos_1/EVX2_RRYRVQNMK_193.pdf]



Supplement: SUPPLEMENTAL_Matl.zip [file Emx2_KRIRVQNTK_194.pdf › SUPPLEMENTAL_Matl/rCLAMPS/STAMP/alignedLogos_NoyesGrps/logos_1/Emx2_KRIRVQNTK_194.pdf]



WebLogo 3.6.0

Supplement: SUPPLEMENTAL_Matl.zip [file En1_KRPRIQNAK_195.pdf › SUPPLEMENTAL_Matl/rCLAMPS/STAMP/alignedLogos_NoyesGrps/logos_1/En1_KRPRIQNAK_195.pdf]



WebLogo 3.6.0

Supplement: SUPPLEMENTAL_Matl.zip [file En2_KRPRIQNAK_196.pdf › SUPPLEMENTAL_Matl/rCLAMPS/STAMP/alignedLogos_NoyesGrps/logos_1/En2_KRPRIQNAK_196.pdf]

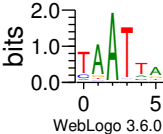

Supplement: SUPPLEMENTAL_Matl.zip [file Esx1_RRYRVQNAK.pdf › SUPPLEMENTAL_Matl/rCLAMPS/STAMP/alignedLogos_NoyesGrps/logos_1/Esx1_RRYRVQNAK.pdf]



WebLogo 3.6.0

Supplement: SUPPLEMENTAL_Matl.zip [file Evx1_RRYRVQNMK_197.pdf › SUPPLEMENTAL_Matl/rCLAMPS/STAMP/alignedLogos_NoyesGrps/logos_1/Evx1_RRYRVQNMK_197.pdf]



WebLogo 3.6.0

Supplement: SUPPLEMENTAL_Matl.zip [file Evx2_RRYRVQNMK_198.pdf › SUPPLEMENTAL_Matl/rCLAMPS/STAMP/alignedLogos_NoyesGrps/logos_1/Evx2_RRYRVQNMK_198.pdf]

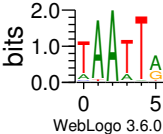

Supplement: SUPPLEMENTAL_Matl.zip [file FGRRES_01100_KGKRIQNQN_199.pdf › SUPPLEMENTAL_Matl/rCLAMPS/STAMP/alignedLogos_NoyesGrps/logos_1/FGRRES_01100_KGKRIQNQN_199.pdf]

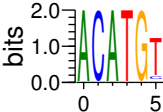

WebLogo 3.6.0

Supplement: SUPPLEMENTAL_Matl.zip [file FGRRES_07914_GKRTNANRR_200.pdf › SUPPLEMENTAL_Matl/rCLAMPS/STAMP/alignedLogos_NoyesGrps/logos_1/FGRRES_07914_GKRTNANRR_200.pdf]

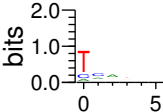

WebLogo 3.6.0

Supplement: SUPPLEMENTAL_Matl.zip [file FGRRES_16926_M_PKVGNANRR_201.pdf › SUPPLEMENTAL_Matl/rCLAMPS/STAMP/alignedLogos_NoyesGrps/logos_1/FGRRES_16926_M_PKVGNANRR_201.pdf]

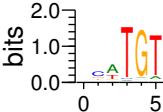

WebLogo 3.6.0

Supplement: SUPPLEMENTAL_Matl.zip [file FGRRES_17150_PKIGNANRR_202.pdf › SUPPLEMENTAL_Matl/rCLAMPS/STAMP/alignedLogos_NoyesGrps/logos_1/FGRRES_17150_PKIGNANRR_202.pdf]

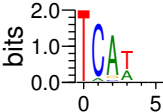

WebLogo 3.6.0

Supplement: SUPPLEMENTAL_Matl.zip [file FGRRES_17152_AKVGNANRR_203.pdf › SUPPLEMENTAL_Matl/rCLAMPS/STAMP/alignedLogos_NoyesGrps/logos_1/FGRRES_17152_AKVGNANRR_203.pdf]

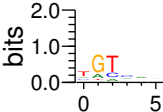

WebLogo 3.6.0

Supplement: SUPPLEMENTAL_Matl.zip [file FGRRES_17238_PKIGNANRR_204.pdf › SUPPLEMENTAL_Matl/rCLAMPS/STAMP/alignedLogos_NoyesGrps/logos_1/FGRRES_17238_PKIGNANRR_204.pdf]

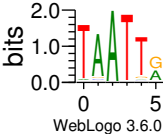

Supplement: SUPPLEMENTAL_Matl.zip [file GBX1_RRRRIQNAK.pdf › SUPPLEMENTAL_Matl/rCLAMPS/STAMP/alignedLogos_NoyesGrps/logos_1/GBX1_RRRRIQNAK.pdf]

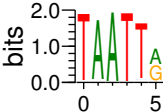

WebLogo 3.6.0

Supplement: SUPPLEMENTAL_Matl.zip [file GBX1_RRRRIQNAK_205.pdf › SUPPLEMENTAL_Matl/rCLAMPS/STAMP/alignedLogos_NoyesGrps/logos_1/GBX1_RRRRIQNAK_205.pdf]

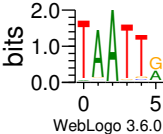

Supplement: SUPPLEMENTAL_Matl.zip [file GBX2_RRRRIQNAK.pdf › SUPPLEMENTAL_Matl/rCLAMPS/STAMP/alignedLogos_NoyesGrps/logos_1/GBX2_RRRRIQNAK.pdf]

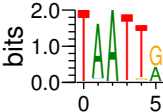

WebLogo 3.6.0

Supplement: SUPPLEMENTAL_Matl.zip [file GBX2_RRRRIQNAK_206.pdf › SUPPLEMENTAL_Matl/rCLAMPS/STAMP/alignedLogos_NoyesGrps/logos_1/GBX2_RRRRIQNAK_206.pdf]

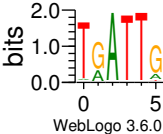

Supplement: SUPPLEMENTAL_Matl.zip [file GRMZM2G038252_ARQRNQNAR.pdf › SUPPLEMENTAL_Matl/rCLAMPS/STAMP/alignedLogos_NoyesGrps/logos_1/GRMZM2G038252_ARQRNQNAR.pdf]
