# Supplementary figures and images for: Learning probabilistic protein–DNA recognition codes from DNA-binding specificities using structural mappings (part 11 of 25)
Source: HighWire-hosted journal article supplement (doi:10.1101/gr.276606.122), 2022-09-01

base

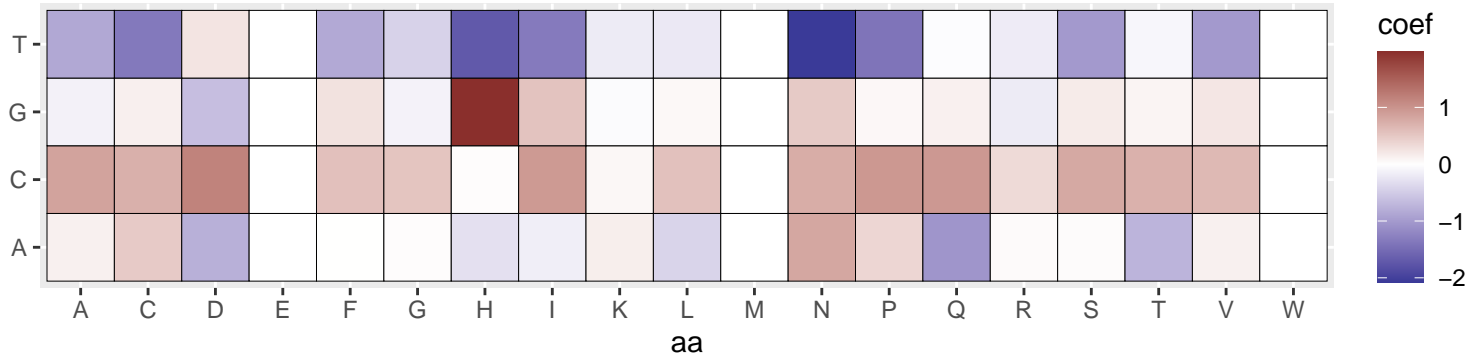

Supplement: SUPPLEMENTAL_Matl.zip [file coef_b1.a5.pdf › SUPPLEMENTAL_Matl/rCLAMPS/coefficientExplore/homeodomain/coef_plots/coef_b1.a5.pdf]

base

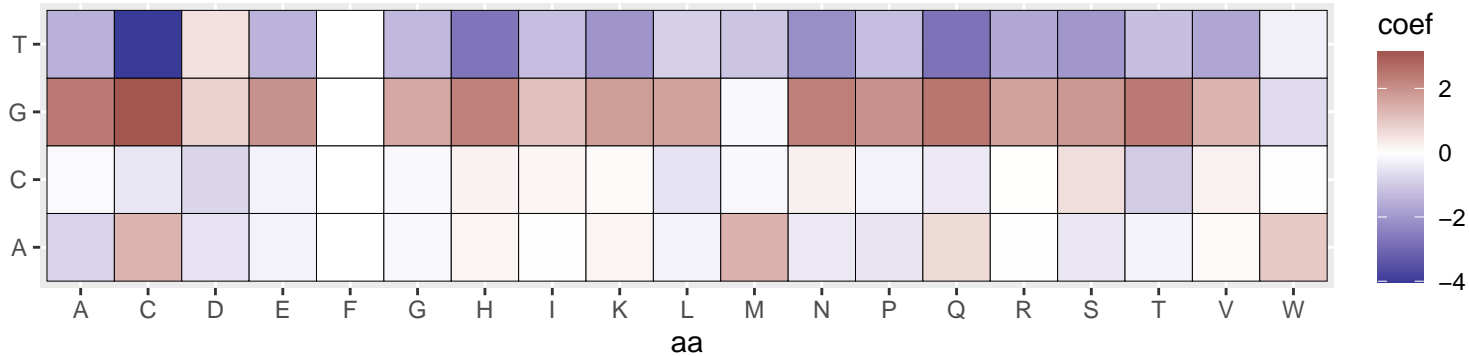

Supplement: SUPPLEMENTAL_Matl.zip [file coef_b2.a2.pdf › SUPPLEMENTAL_Matl/rCLAMPS/coefficientExplore/homeodomain/coef_plots/coef_b2.a2.pdf]

base

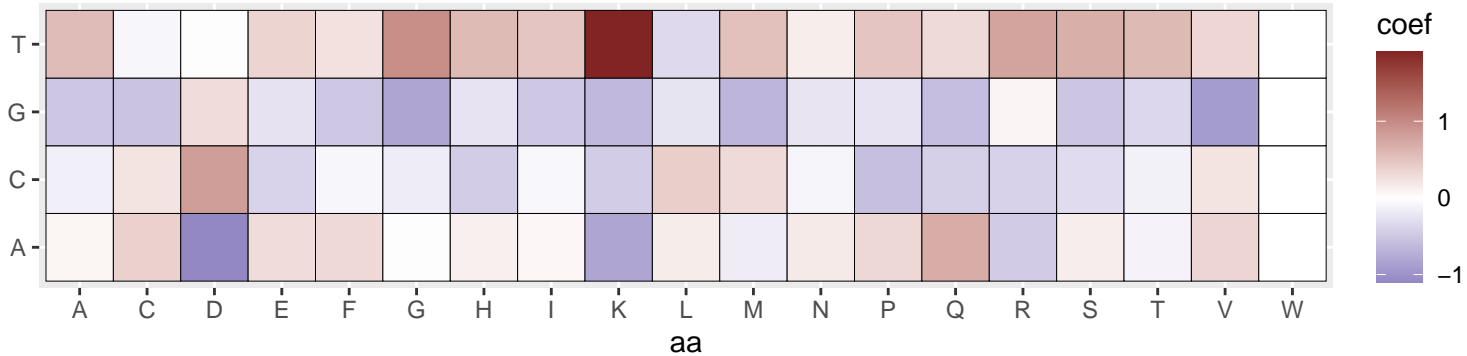

Supplement: SUPPLEMENTAL_Matl.zip [file coef_b2.a4.pdf › SUPPLEMENTAL_Matl/rCLAMPS/coefficientExplore/homeodomain/coef_plots/coef_b2.a4.pdf]

base

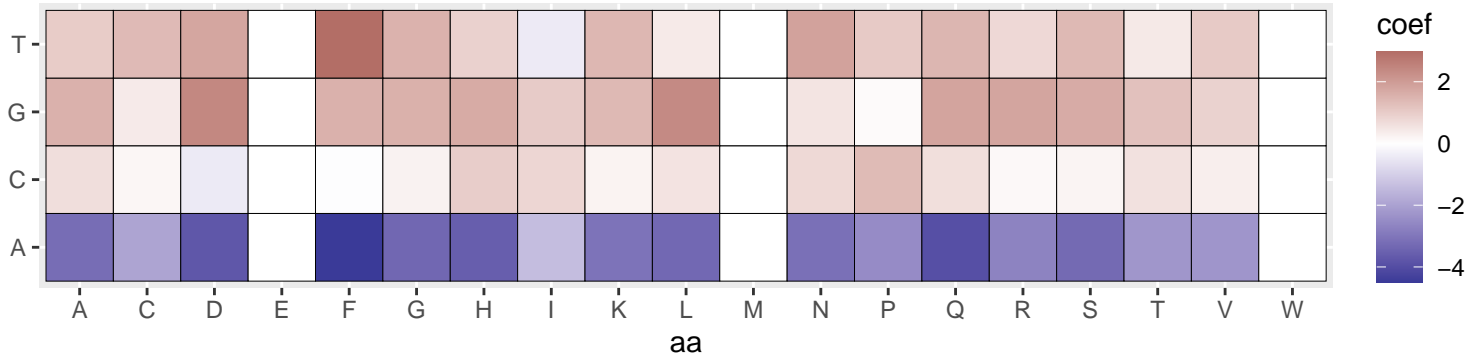

Supplement: SUPPLEMENTAL_Matl.zip [file coef_b2.a5.pdf › SUPPLEMENTAL_Matl/rCLAMPS/coefficientExplore/homeodomain/coef_plots/coef_b2.a5.pdf]

base

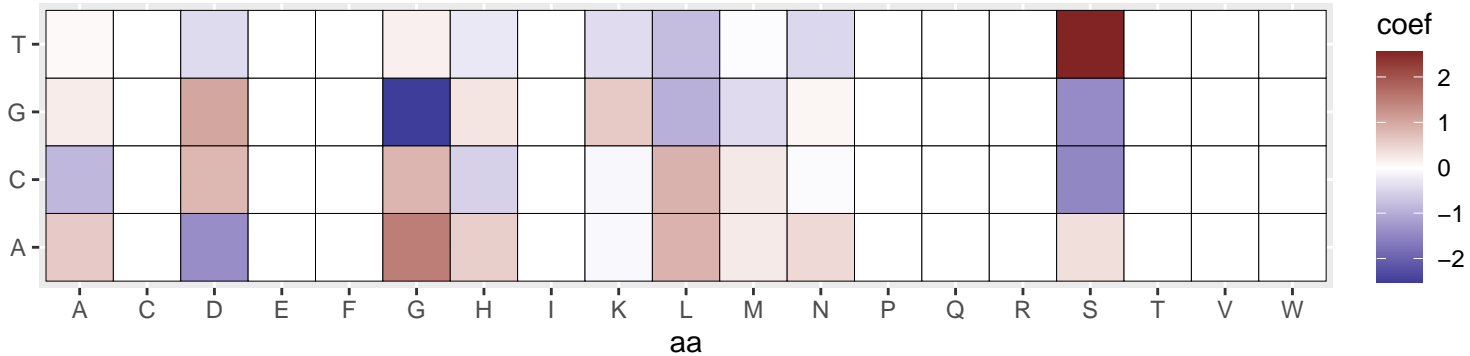

Supplement: SUPPLEMENTAL_Matl.zip [file coef_b2.a51.pdf › SUPPLEMENTAL_Matl/rCLAMPS/coefficientExplore/homeodomain/coef_plots/coef_b2.a51.pdf]

base

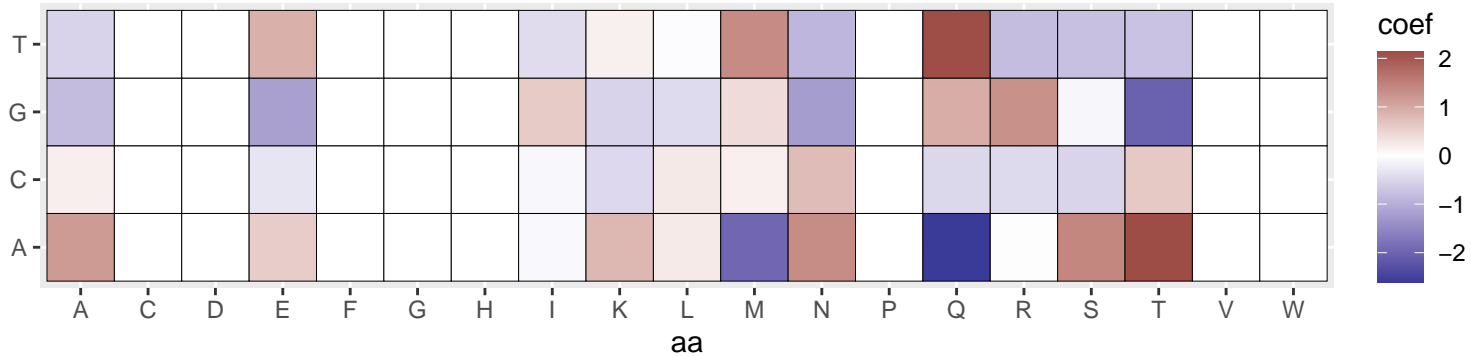

Supplement: SUPPLEMENTAL_Matl.zip [file coef_b2.a55.pdf › SUPPLEMENTAL_Matl/rCLAMPS/coefficientExplore/homeodomain/coef_plots/coef_b2.a55.pdf]

base

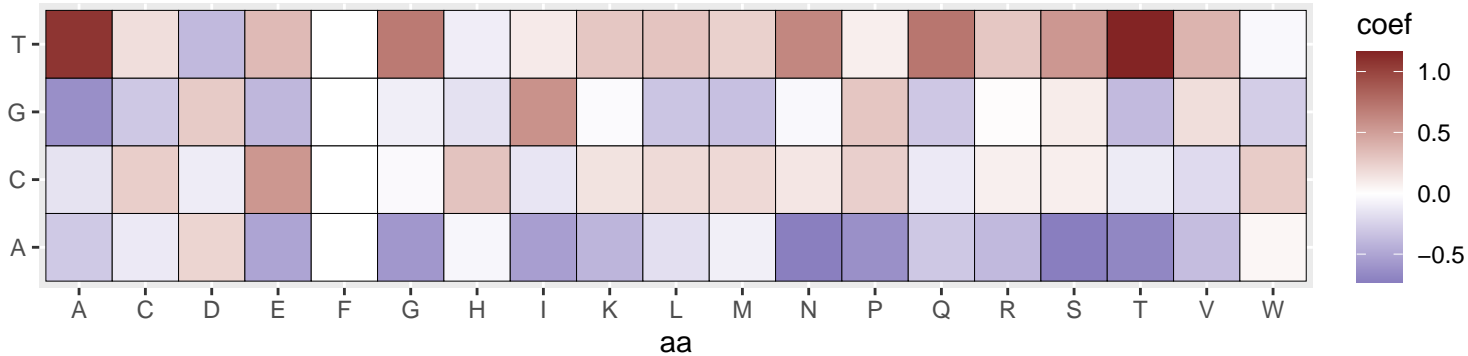

Supplement: SUPPLEMENTAL_Matl.zip [file coef_b3.a2.pdf › SUPPLEMENTAL_Matl/rCLAMPS/coefficientExplore/homeodomain/coef_plots/coef_b3.a2.pdf]

base

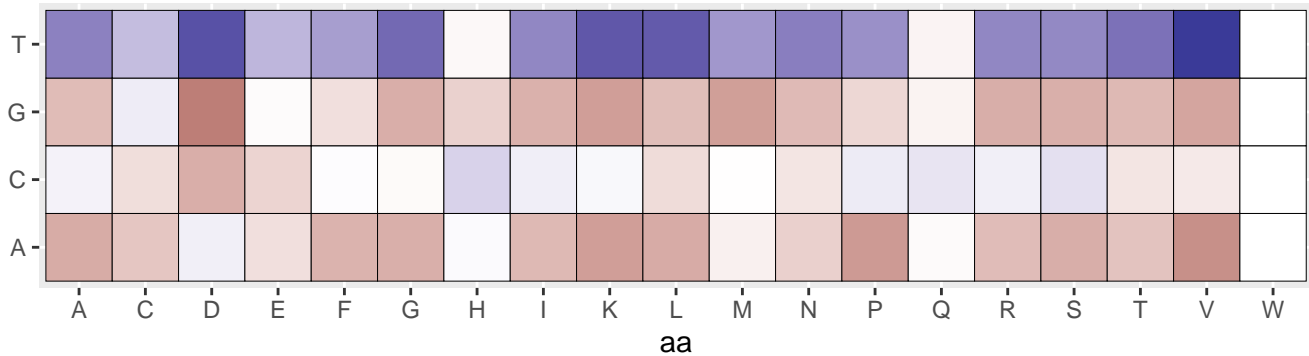

coef

0.5

0.0

-0.5

-1.0

Supplement: SUPPLEMENTAL_Matl.zip [file coef_b3.a4.pdf › SUPPLEMENTAL_Matl/rCLAMPS/coefficientExplore/homeodomain/coef_plots/coef_b3.a4.pdf]

base

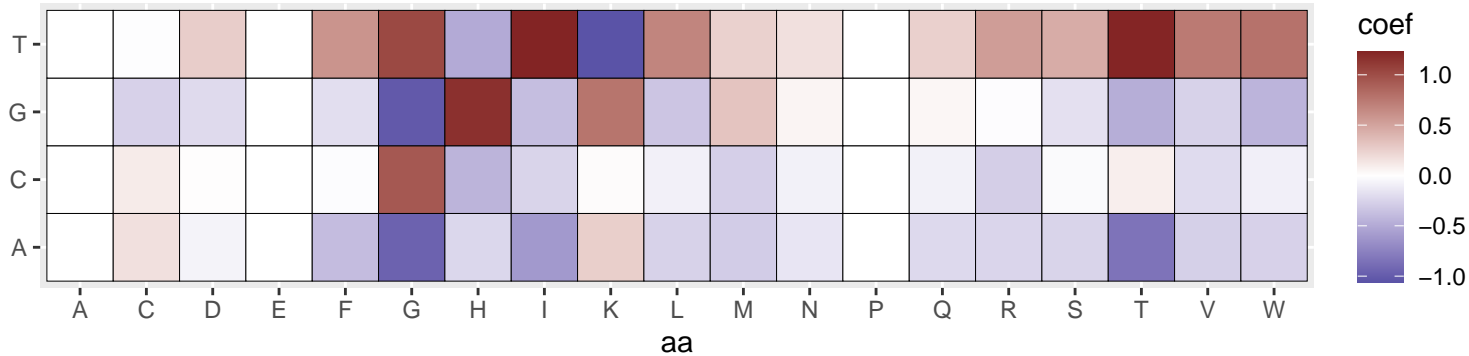

Supplement: SUPPLEMENTAL_Matl.zip [file coef_b3.a47.pdf › SUPPLEMENTAL_Matl/rCLAMPS/coefficientExplore/homeodomain/coef_plots/coef_b3.a47.pdf]

base

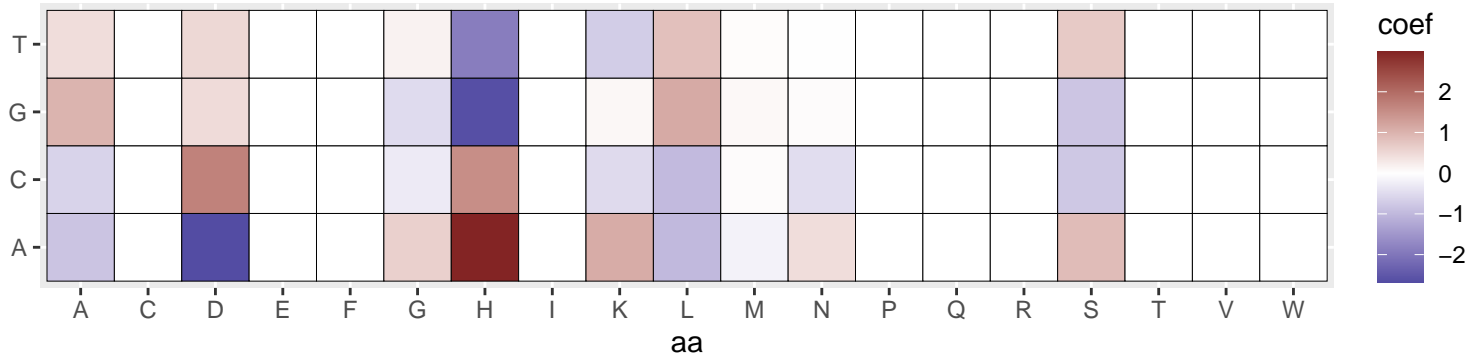

Supplement: SUPPLEMENTAL_Matl.zip [file coef_b3.a51.pdf › SUPPLEMENTAL_Matl/rCLAMPS/coefficientExplore/homeodomain/coef_plots/coef_b3.a51.pdf]

base

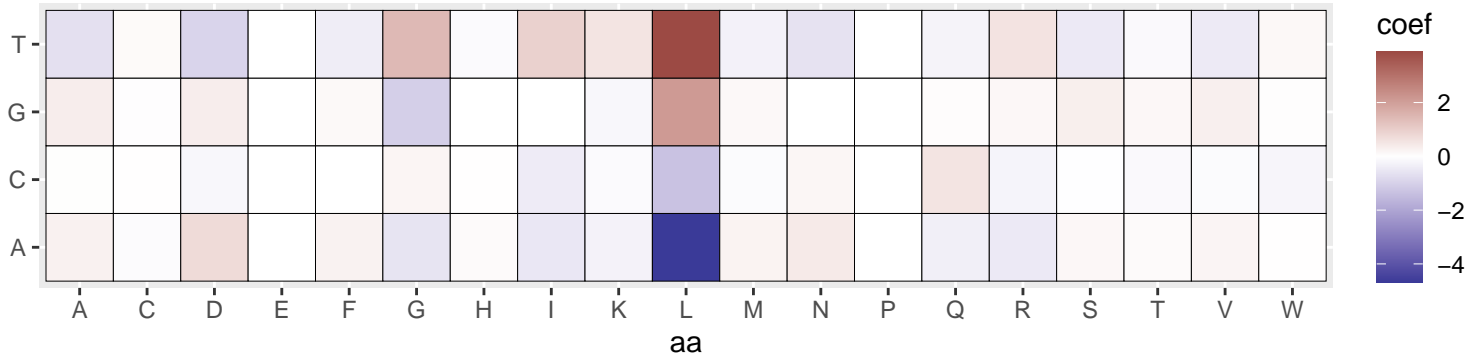

Supplement: SUPPLEMENTAL_Matl.zip [file coef_b3.a54.pdf › SUPPLEMENTAL_Matl/rCLAMPS/coefficientExplore/homeodomain/coef_plots/coef_b3.a54.pdf]

base

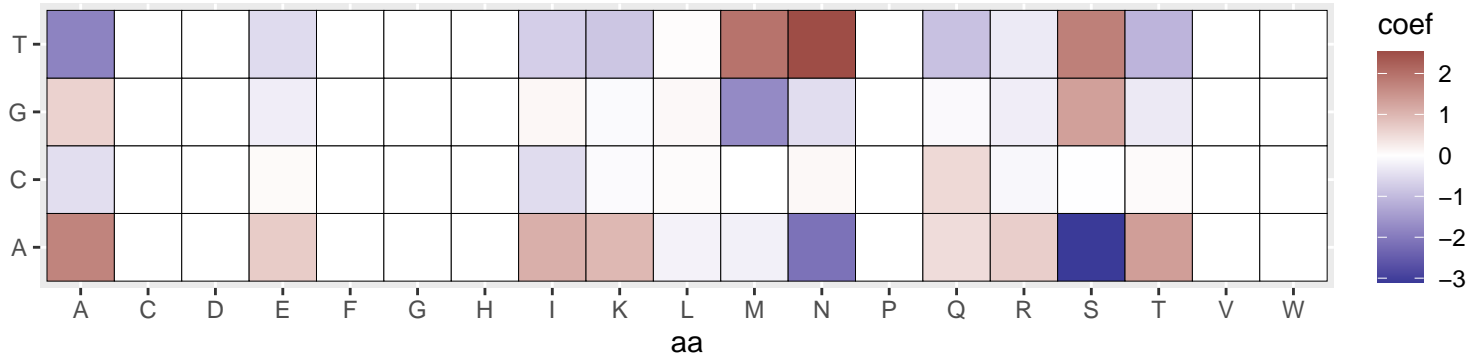

Supplement: SUPPLEMENTAL_Matl.zip [file coef_b3.a55.pdf › SUPPLEMENTAL_Matl/rCLAMPS/coefficientExplore/homeodomain/coef_plots/coef_b3.a55.pdf]

base

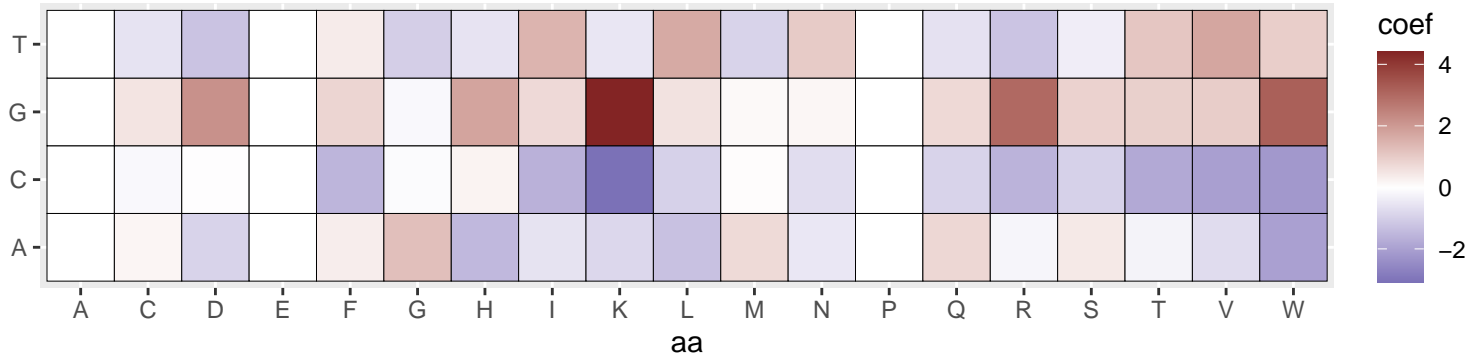

Supplement: SUPPLEMENTAL_Matl.zip [file coef_b4.a47.pdf › SUPPLEMENTAL_Matl/rCLAMPS/coefficientExplore/homeodomain/coef_plots/coef_b4.a47.pdf]

base

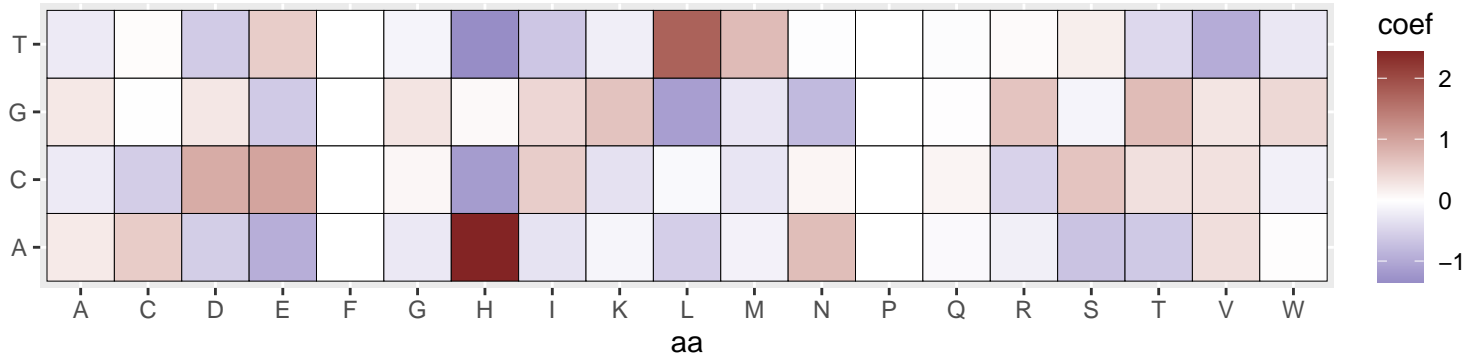

Supplement: SUPPLEMENTAL_Matl.zip [file coef_b4.a50.pdf › SUPPLEMENTAL_Matl/rCLAMPS/coefficientExplore/homeodomain/coef_plots/coef_b4.a50.pdf]

base

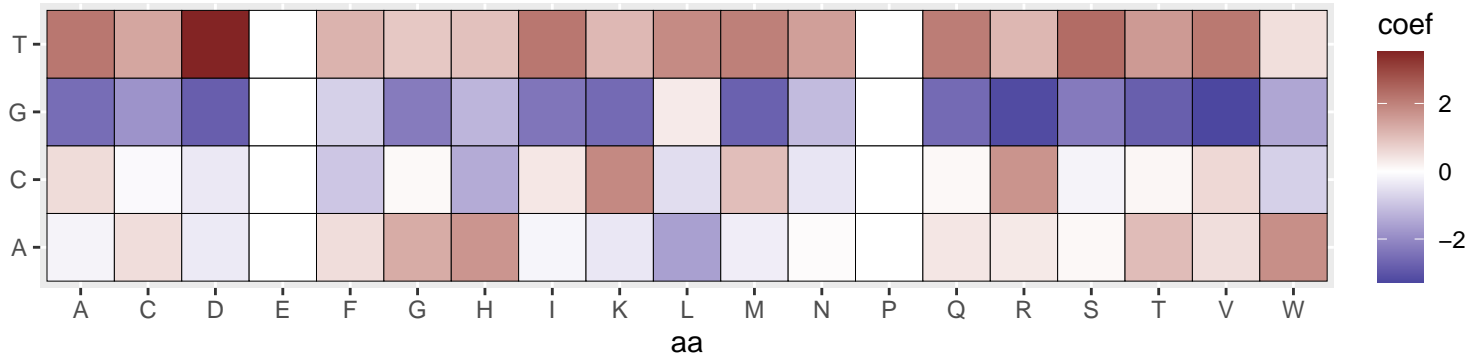

Supplement: SUPPLEMENTAL_Matl.zip [file coef_b4.a54.pdf › SUPPLEMENTAL_Matl/rCLAMPS/coefficientExplore/homeodomain/coef_plots/coef_b4.a54.pdf]

base

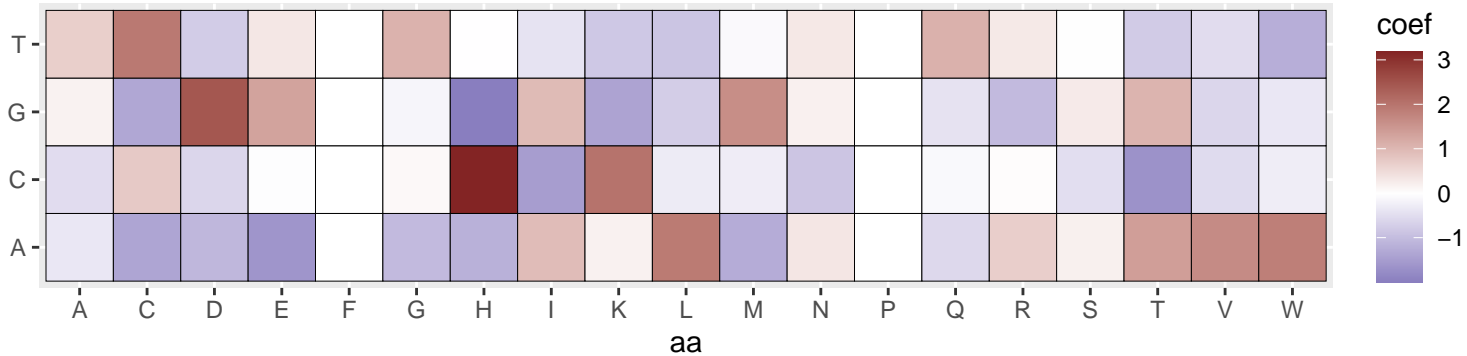

Supplement: SUPPLEMENTAL_Matl.zip [file coef_b5.a50.pdf › SUPPLEMENTAL_Matl/rCLAMPS/coefficientExplore/homeodomain/coef_plots/coef_b5.a50.pdf]

base

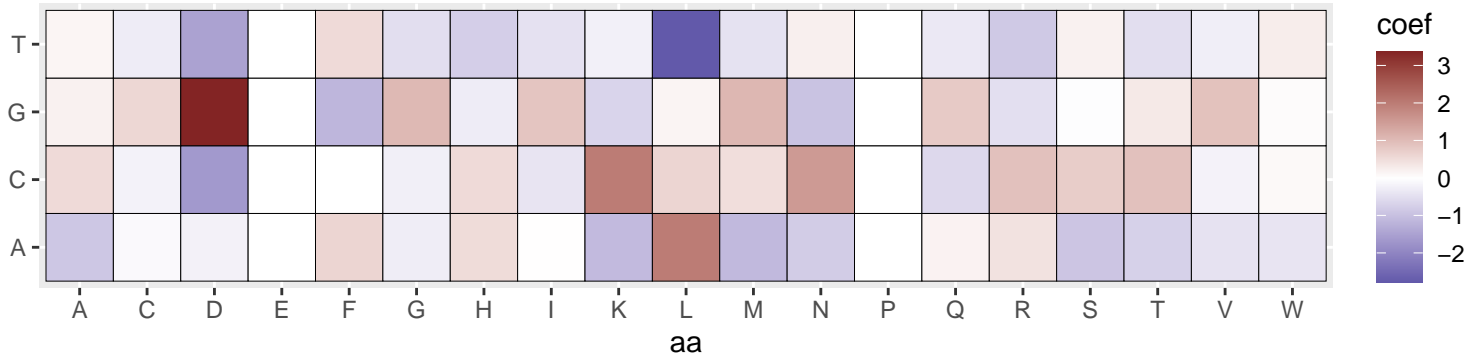

Supplement: SUPPLEMENTAL_Matl.zip [file coef_b5.a54.pdf › SUPPLEMENTAL_Matl/rCLAMPS/coefficientExplore/homeodomain/coef_plots/coef_b5.a54.pdf]

base

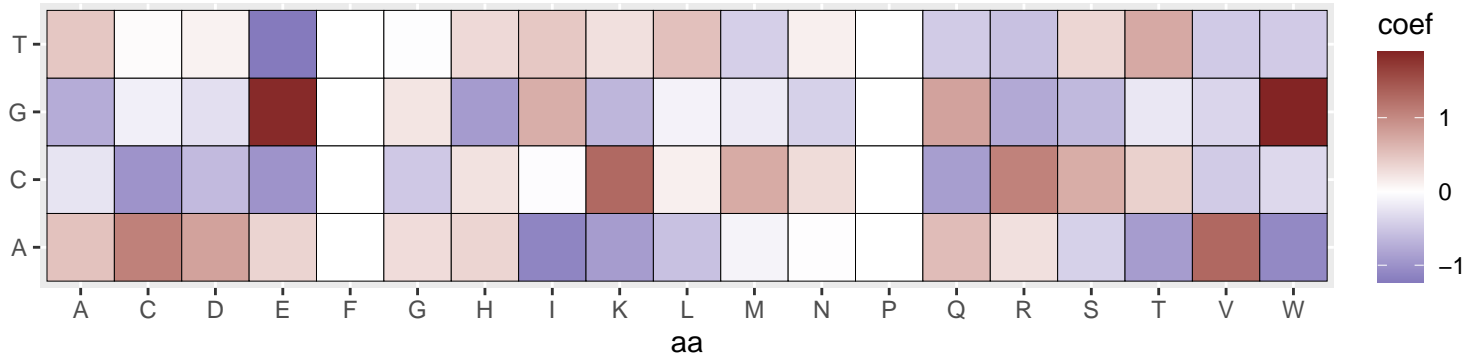

Supplement: SUPPLEMENTAL_Matl.zip [file coef_b6.a50.pdf › SUPPLEMENTAL_Matl/rCLAMPS/coefficientExplore/homeodomain/coef_plots/coef_b6.a50.pdf]

base

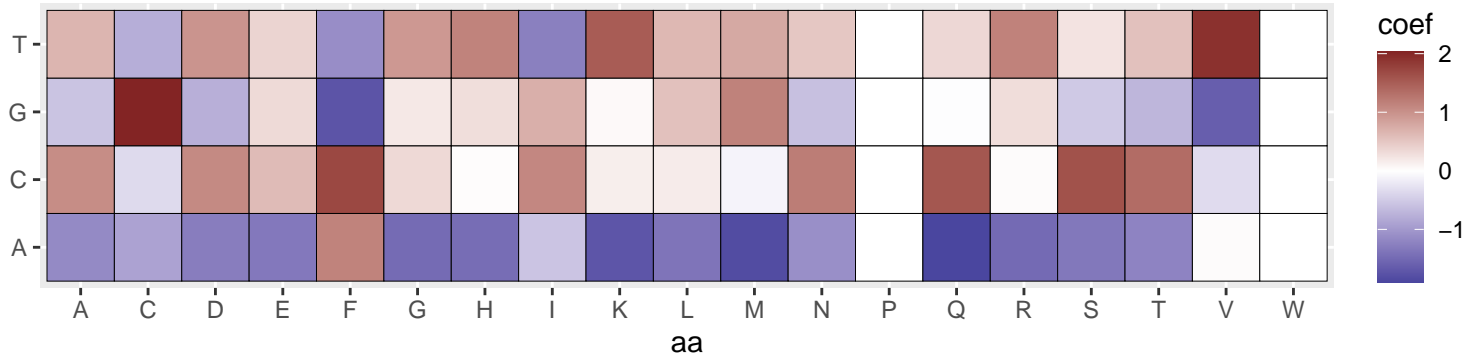

Supplement: SUPPLEMENTAL_Matl.zip [file coef_b1.a3.pdf › SUPPLEMENTAL_Matl/rCLAMPS/coefficientExplore/zf-C2H2/coef_plots/coef_b1.a3.pdf]

base

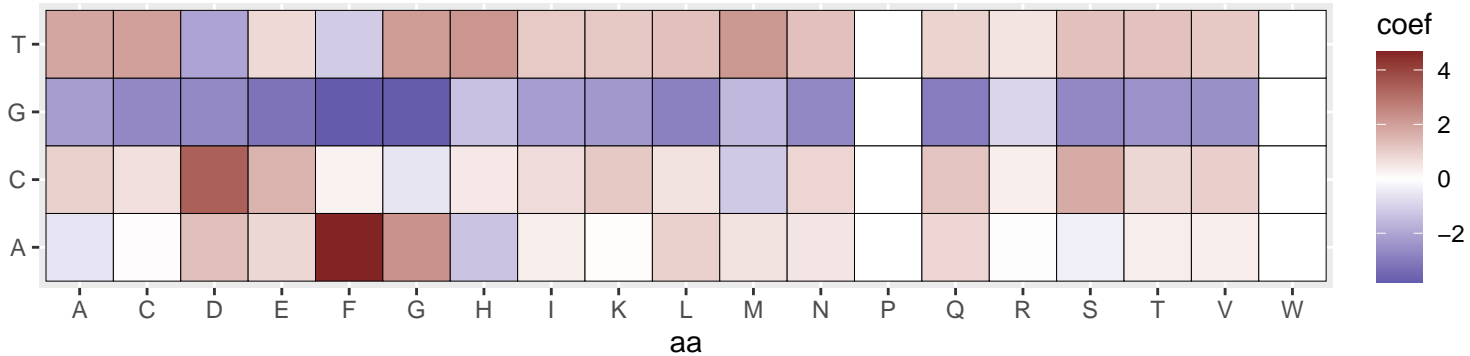

Supplement: SUPPLEMENTAL_Matl.zip [file coef_b1.a6.pdf › SUPPLEMENTAL_Matl/rCLAMPS/coefficientExplore/zf-C2H2/coef_plots/coef_b1.a6.pdf]

base

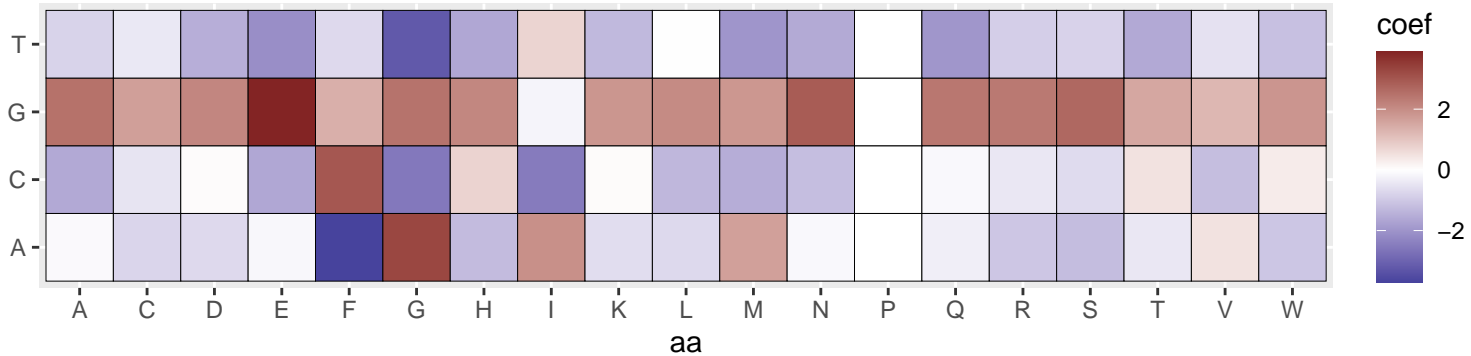

Supplement: SUPPLEMENTAL_Matl.zip [file coef_b2.a-1.pdf › SUPPLEMENTAL_Matl/rCLAMPS/coefficientExplore/zf-C2H2/coef_plots/coef_b2.a-1.pdf]

base

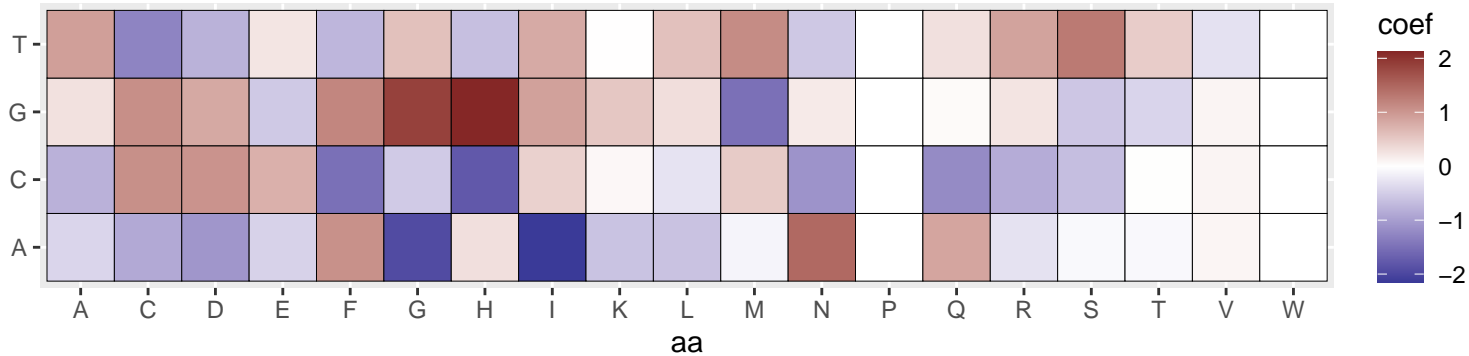

Supplement: SUPPLEMENTAL_Matl.zip [file coef_b2.a3.pdf › SUPPLEMENTAL_Matl/rCLAMPS/coefficientExplore/zf-C2H2/coef_plots/coef_b2.a3.pdf]

base

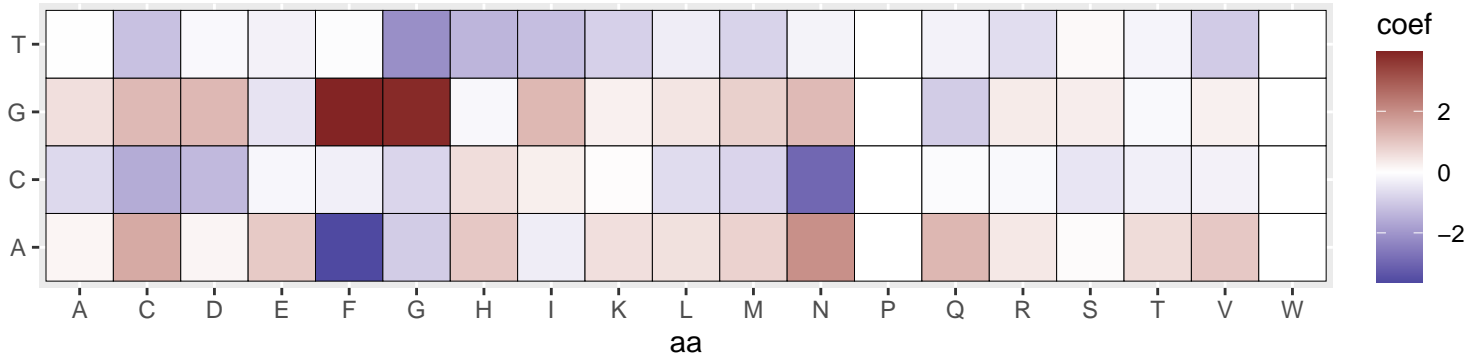

Supplement: SUPPLEMENTAL_Matl.zip [file coef_b2.a6.pdf › SUPPLEMENTAL_Matl/rCLAMPS/coefficientExplore/zf-C2H2/coef_plots/coef_b2.a6.pdf]

base

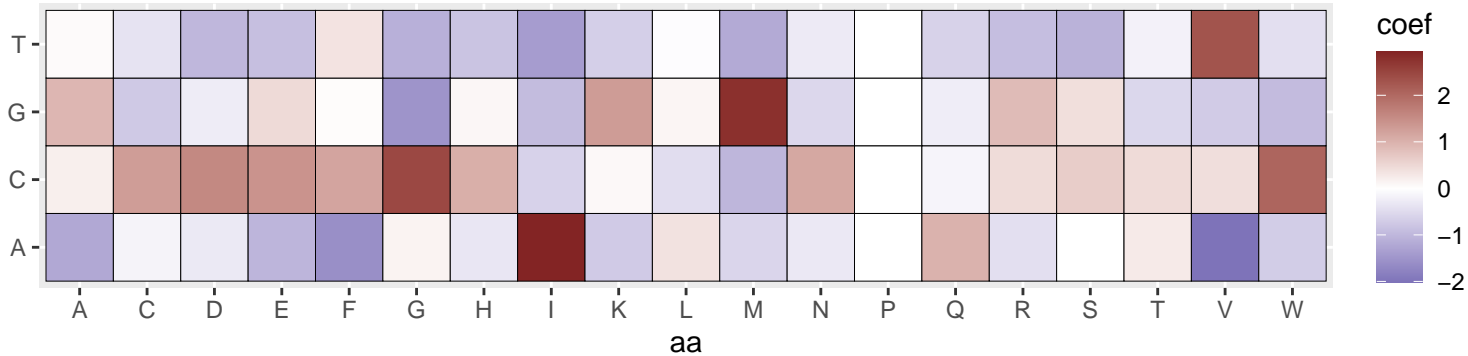

Supplement: SUPPLEMENTAL_Matl.zip [file coef_b3.a-1.pdf › SUPPLEMENTAL_Matl/rCLAMPS/coefficientExplore/zf-C2H2/coef_plots/coef_b3.a-1.pdf]

base

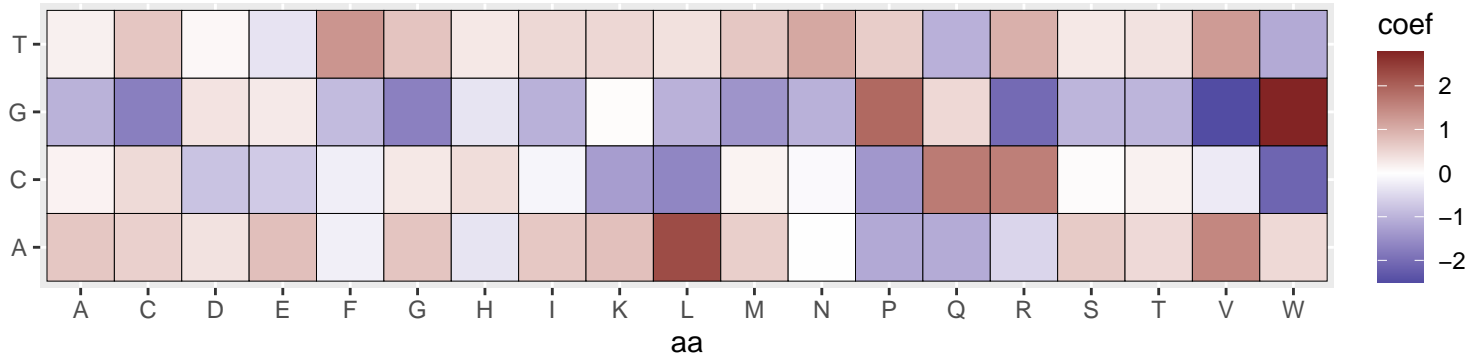

Supplement: SUPPLEMENTAL_Matl.zip [file coef_b3.a2.pdf › SUPPLEMENTAL_Matl/rCLAMPS/coefficientExplore/zf-C2H2/coef_plots/coef_b3.a2.pdf]

base

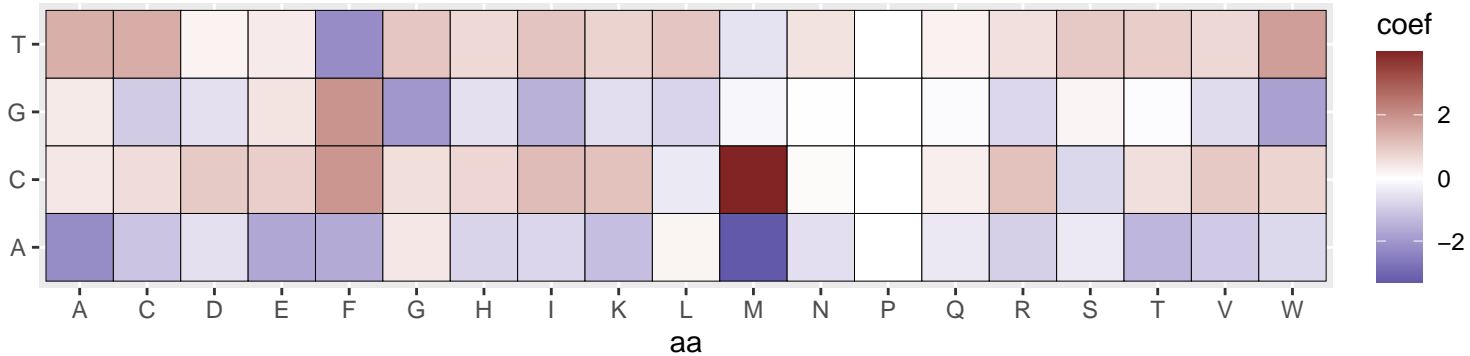

Supplement: SUPPLEMENTAL_Matl.zip [file coef_b4.a-1.pdf › SUPPLEMENTAL_Matl/rCLAMPS/coefficientExplore/zf-C2H2/coef_plots/coef_b4.a-1.pdf]

base

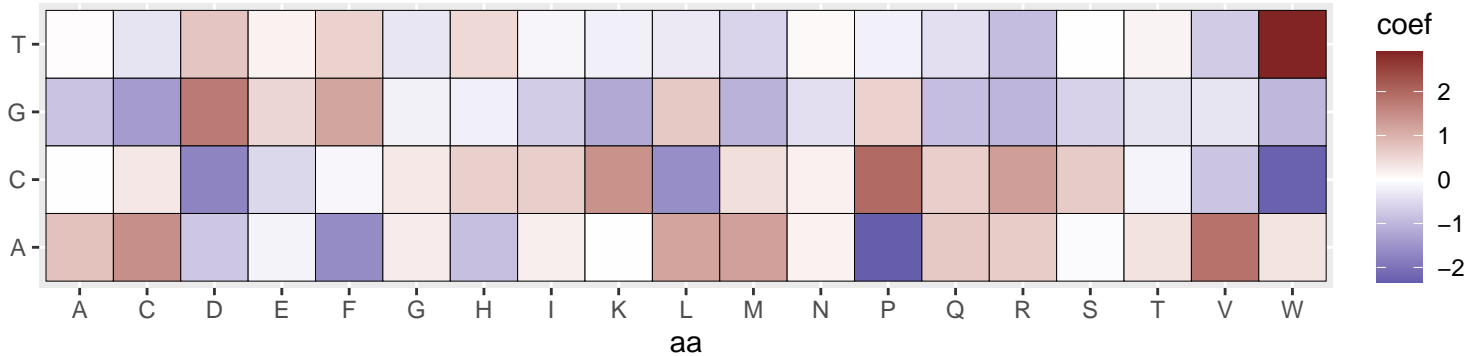

Supplement: SUPPLEMENTAL_Matl.zip [file coef_b4.a2.pdf › SUPPLEMENTAL_Matl/rCLAMPS/coefficientExplore/zf-C2H2/coef_plots/coef_b4.a2.pdf]

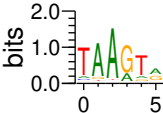

WebLogo 3.6.0

Supplement: SUPPLEMENTAL_Matl.zip [file 205_GAA_TQRQW.pdf › SUPPLEMENTAL_Matl/rCLAMPS/examplePredictions/homeodomain/predicted_logos/205_GAA_TQRQW.pdf]

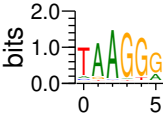

WebLogo 3.6.0

Supplement: SUPPLEMENTAL_Matl.zip [file 217_GGG_KSKEG.pdf › SUPPLEMENTAL_Matl/rCLAMPS/examplePredictions/homeodomain/predicted_logos/217_GGG_KSKEG.pdf]

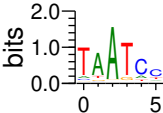

WebLogo 3.6.0

Supplement: SUPPLEMENTAL_Matl.zip [file DMBX1.pdf › SUPPLEMENTAL_Matl/rCLAMPS/examplePredictions/homeodomain/predicted_logos/DMBX1.pdf]

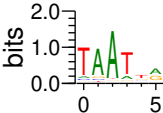

WebLogo 3.6.0

Supplement: SUPPLEMENTAL_Matl.zip [file EMX2.pdf › SUPPLEMENTAL_Matl/rCLAMPS/examplePredictions/homeodomain/predicted_logos/EMX2.pdf]

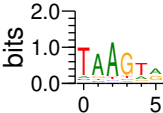

WebLogo 3.6.0

Supplement: SUPPLEMENTAL_Matl.zip [file ENSCING00000007395.pdf › SUPPLEMENTAL_Matl/rCLAMPS/examplePredictions/homeodomain/predicted_logos/ENSCING00000007395.pdf]

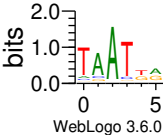

Supplement: SUPPLEMENTAL_Matl.zip [file Hoxa2.pdf › SUPPLEMENTAL_Matl/rCLAMPS/examplePredictions/homeodomain/predicted_logos/Hoxa2.pdf]

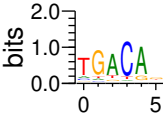

WebLogo 3.6.0

Supplement: SUPPLEMENTAL_Matl.zip [file MEIS3.pdf › SUPPLEMENTAL_Matl/rCLAMPS/examplePredictions/homeodomain/predicted_logos/MEIS3.pdf]

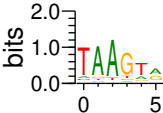

Supplement: SUPPLEMENTAL_Matl.zip [file NKX3-1.pdf › SUPPLEMENTAL_Matl/rCLAMPS/examplePredictions/homeodomain/predicted_logos/NKX3-1.pdf]

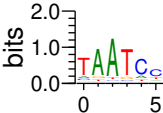

WebLogo 3.6.0

Supplement: SUPPLEMENTAL_Matl.zip [file Obox1.pdf › SUPPLEMENTAL_Matl/rCLAMPS/examplePredictions/homeodomain/predicted_logos/Obox1.pdf]

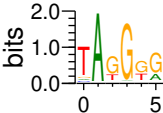

WebLogo 3.6.0

Supplement: SUPPLEMENTAL_Matl.zip [file PK19166.1.pdf › SUPPLEMENTAL_Matl/rCLAMPS/examplePredictions/homeodomain/predicted_logos/PK19166.1.pdf]

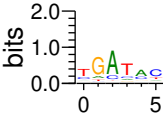

WebLogo 3.6.0

Supplement: SUPPLEMENTAL_Matl.zip [file SIX1.pdf › SUPPLEMENTAL_Matl/rCLAMPS/examplePredictions/homeodomain/predicted_logos/SIX1.pdf]

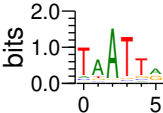

Supplement: SUPPLEMENTAL_Matl.zip [file Uncx.pdf › SUPPLEMENTAL_Matl/rCLAMPS/examplePredictions/homeodomain/predicted_logos/Uncx.pdf]

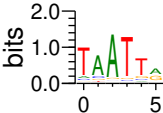

WebLogo 3.6.0

Supplement: SUPPLEMENTAL_Matl.zip [file ap.pdf › SUPPLEMENTAL_Matl/rCLAMPS/examplePredictions/homeodomain/predicted_logos/ap.pdf]

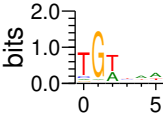

WebLogo 3.6.0

Supplement: SUPPLEMENTAL_Matl.zip [file caup.pdf › SUPPLEMENTAL_Matl/rCLAMPS/examplePredictions/homeodomain/predicted_logos/caup.pdf]

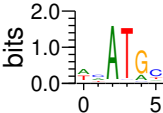

WebLogo 3.6.0

Supplement: SUPPLEMENTAL_Matl.zip [file hbx7.pdf › SUPPLEMENTAL_Matl/rCLAMPS/examplePredictions/homeodomain/predicted_logos/hbx7.pdf]

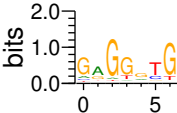

WebLogo 3.6.0

Supplement: SUPPLEMENTAL_Matl.zip [file B0310.2.pdf › SUPPLEMENTAL_Matl/rCLAMPS/examplePredictions/zf-C2H2/predicted_logos/B0310.2.pdf]

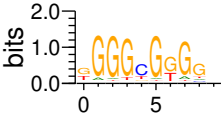

WebLogo 3.6.0

Supplement: SUPPLEMENTAL_Matl.zip [file Bteb2.pdf › SUPPLEMENTAL_Matl/rCLAMPS/examplePredictions/zf-C2H2/predicted_logos/Bteb2.pdf]

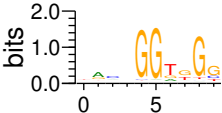

WebLogo 3.6.0

Supplement: SUPPLEMENTAL_Matl.zip [file CG17181.pdf › SUPPLEMENTAL_Matl/rCLAMPS/examplePredictions/zf-C2H2/predicted_logos/CG17181.pdf]

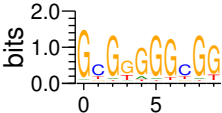

WebLogo 3.6.0

Supplement: SUPPLEMENTAL_Matl.zip [file EGR1.pdf › SUPPLEMENTAL_Matl/rCLAMPS/examplePredictions/zf-C2H2/predicted_logos/EGR1.pdf]

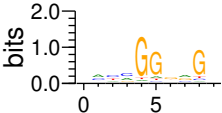

WebLogo 3.6.0

Supplement: SUPPLEMENTAL_Matl.zip [file Osr2.pdf › SUPPLEMENTAL_Matl/rCLAMPS/examplePredictions/zf-C2H2/predicted_logos/Osr2.pdf]

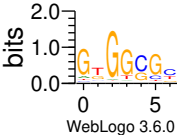

Supplement: SUPPLEMENTAL_Matl.zip [file RO3G_02020.pdf › SUPPLEMENTAL_Matl/rCLAMPS/examplePredictions/zf-C2H2/predicted_logos/RO3G_02020.pdf]

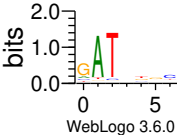

Supplement: SUPPLEMENTAL_Matl.zip [file RO3G_05801.pdf › SUPPLEMENTAL_Matl/rCLAMPS/examplePredictions/zf-C2H2/predicted_logos/RO3G_05801.pdf]

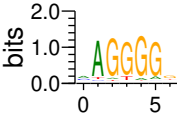

WebLogo 3.6.0

Supplement: SUPPLEMENTAL_Matl.zip [file RO3G_07016.pdf › SUPPLEMENTAL_Matl/rCLAMPS/examplePredictions/zf-C2H2/predicted_logos/RO3G_07016.pdf]

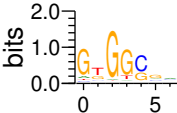

Supplement: SUPPLEMENTAL_Matl.zip [file SCHCODRAFT_8057.pdf › SUPPLEMENTAL_Matl/rCLAMPS/examplePredictions/zf-C2H2/predicted_logos/SCHCODRAFT_8057.pdf]

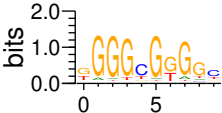

WebLogo 3.6.0

Supplement: SUPPLEMENTAL_Matl.zip [file Sp1.pdf › SUPPLEMENTAL_Matl/rCLAMPS/examplePredictions/zf-C2H2/predicted_logos/Sp1.pdf]

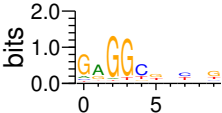

WebLogo 3.6.0

Supplement: SUPPLEMENTAL_Matl.zip [file XP_001540939.1.pdf › SUPPLEMENTAL_Matl/rCLAMPS/examplePredictions/zf-C2H2/predicted_logos/XP_001540939.1.pdf]

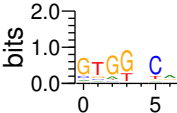

Supplement: SUPPLEMENTAL_Matl.zip [file Y53H1A.2.pdf › SUPPLEMENTAL_Matl/rCLAMPS/examplePredictions/zf-C2H2/predicted_logos/Y53H1A.2.pdf]

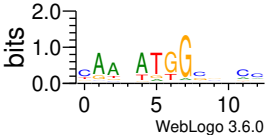

Supplement: SUPPLEMENTAL_Matl.zip [file YY1.pdf › SUPPLEMENTAL_Matl/rCLAMPS/examplePredictions/zf-C2H2/predicted_logos/YY1.pdf]

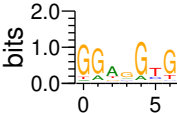

WebLogo 3.6.0

Supplement: SUPPLEMENTAL_Matl.zip [file ZNF705G.pdf › SUPPLEMENTAL_Matl/rCLAMPS/examplePredictions/zf-C2H2/predicted_logos/ZNF705G.pdf]

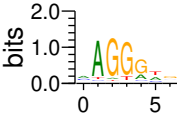

WebLogo 3.6.0

Supplement: SUPPLEMENTAL_Matl.zip [file csp-1.pdf › SUPPLEMENTAL_Matl/rCLAMPS/examplePredictions/zf-C2H2/predicted_logos/csp-1.pdf]

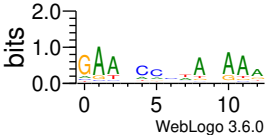

Supplement: SUPPLEMENTAL_Matl.zip [file gl.pdf › SUPPLEMENTAL_Matl/rCLAMPS/examplePredictions/zf-C2H2/predicted_logos/gl.pdf]

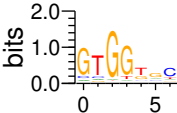

WebLogo 3.6.0

Supplement: SUPPLEMENTAL_Matl.zip [file lola-PL.pdf › SUPPLEMENTAL_Matl/rCLAMPS/examplePredictions/zf-C2H2/predicted_logos/lola-PL.pdf]

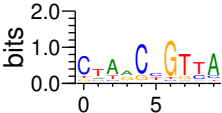

WebLogo 3.6.0

Supplement: SUPPLEMENTAL_Matl.zip [file ovo.pdf › SUPPLEMENTAL_Matl/rCLAMPS/examplePredictions/zf-C2H2/predicted_logos/ovo.pdf]

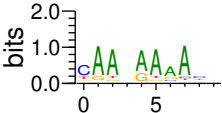

WebLogo 3.6.0

Supplement: SUPPLEMENTAL_Matl.zip [file rn.pdf › SUPPLEMENTAL_Matl/rCLAMPS/examplePredictions/zf-C2H2/predicted_logos/rn.pdf]

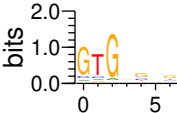

WebLogo 3.6.0

Supplement: SUPPLEMENTAL_Matl.zip [file ztf-3.pdf › SUPPLEMENTAL_Matl/rCLAMPS/examplePredictions/zf-C2H2/predicted_logos/ztf-3.pdf]

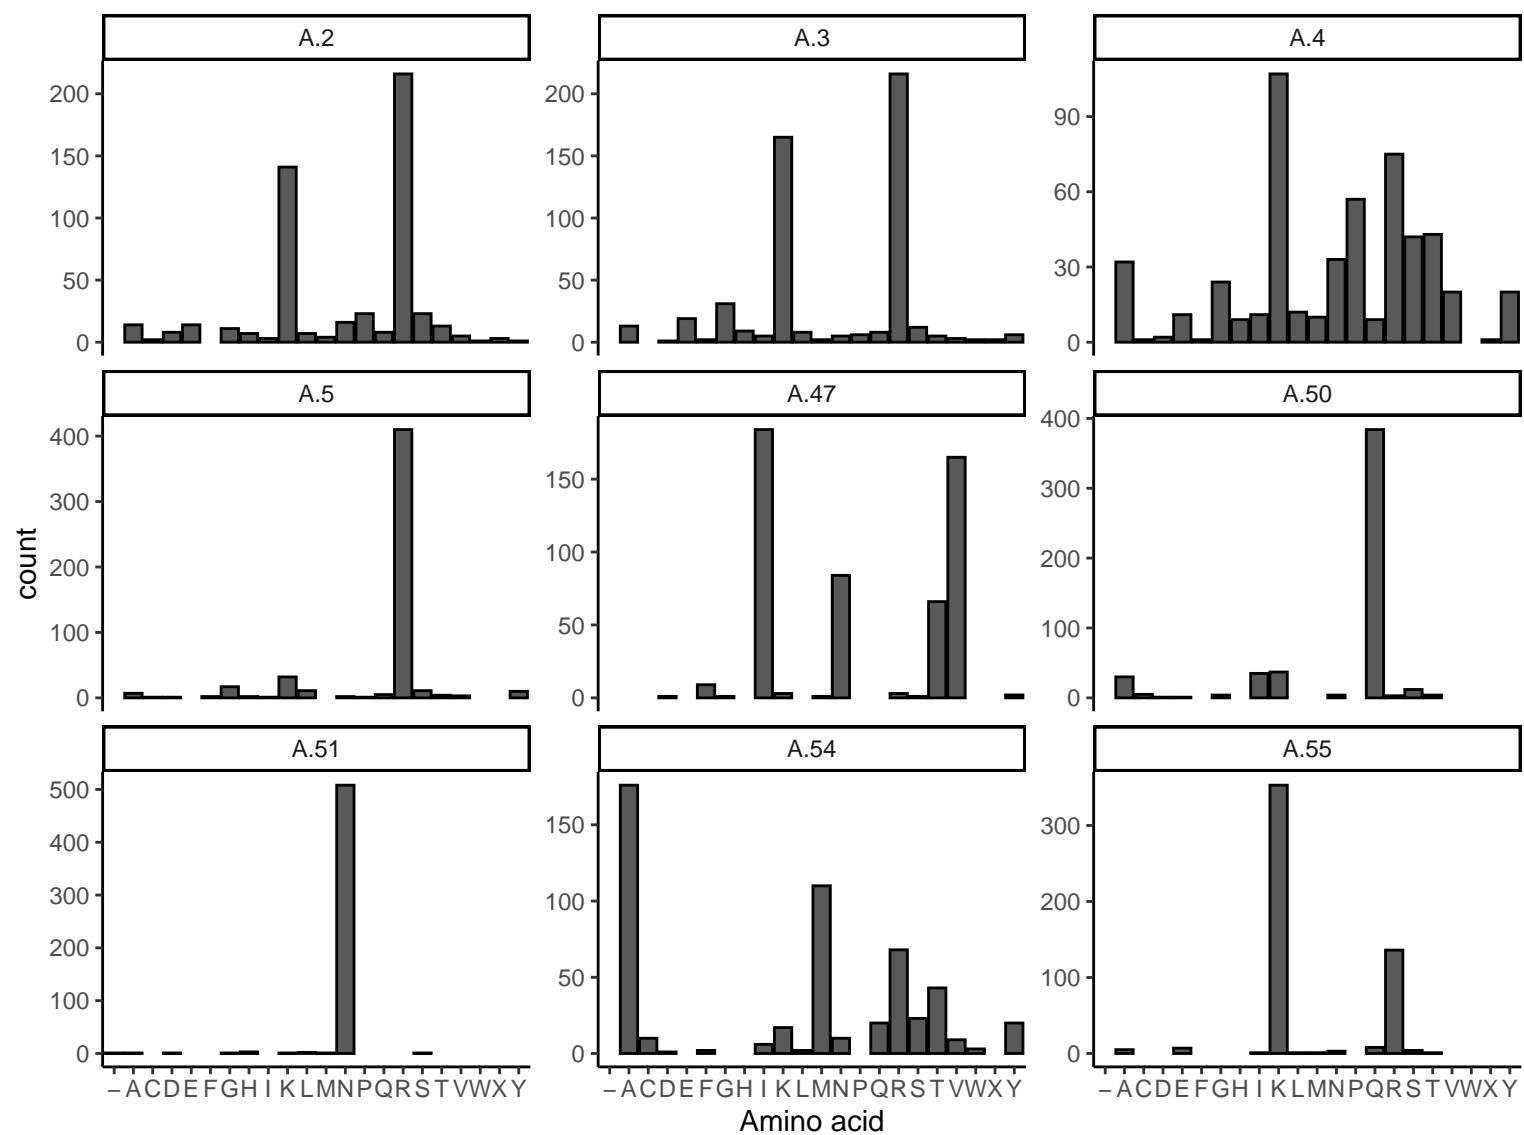

Supplement: SUPPLEMENTAL_Matl.zip [file aa_perPos_CIS-BP.pdf › SUPPLEMENTAL_Matl/rCLAMPS/hd1-explore/0_splitChu2012-trainTest/aa_perPos_CIS-BP.pdf]

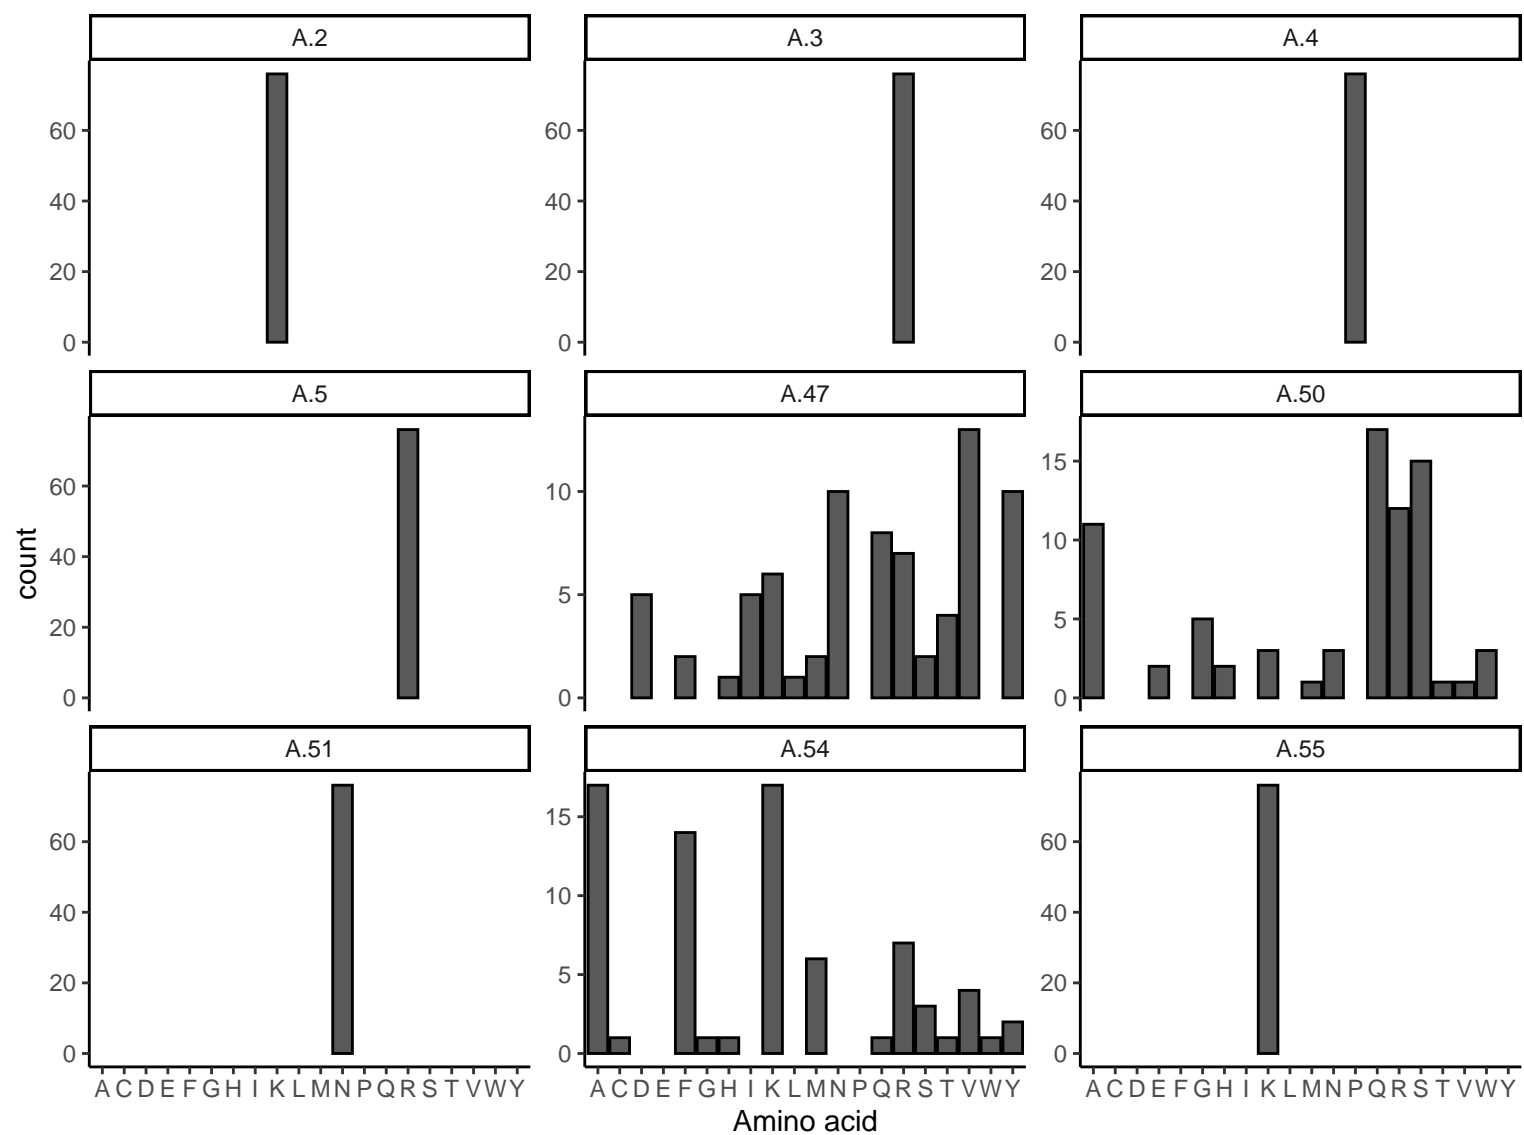

Supplement: SUPPLEMENTAL_Matl.zip [file aa_perPos_Chu2012.pdf › SUPPLEMENTAL_Matl/rCLAMPS/hd1-explore/0_splitChu2012-trainTest/aa_perPos_Chu2012.pdf]

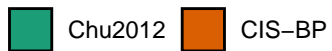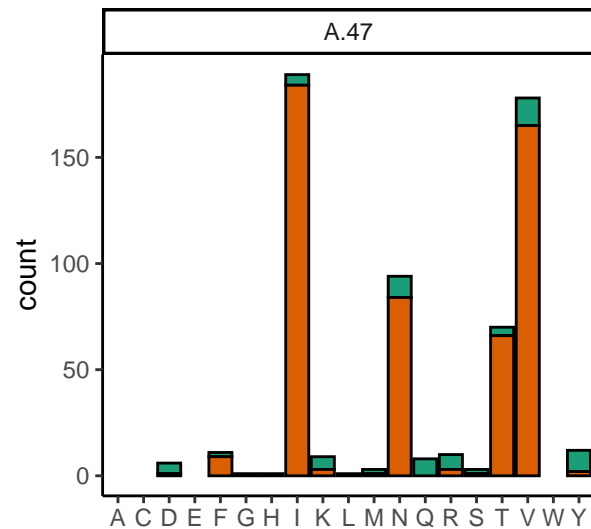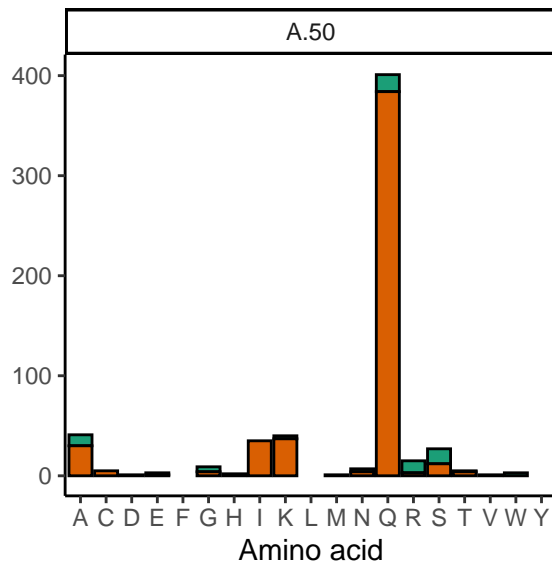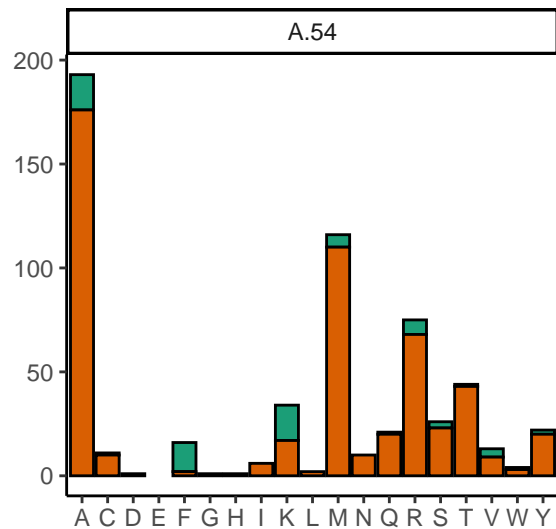

Supplement: SUPPLEMENTAL_Matl.zip [file aa_perPos_both.pdf › SUPPLEMENTAL_Matl/rCLAMPS/hd1-explore/0_splitChu2012-trainTest/aa_perPos_both.pdf]

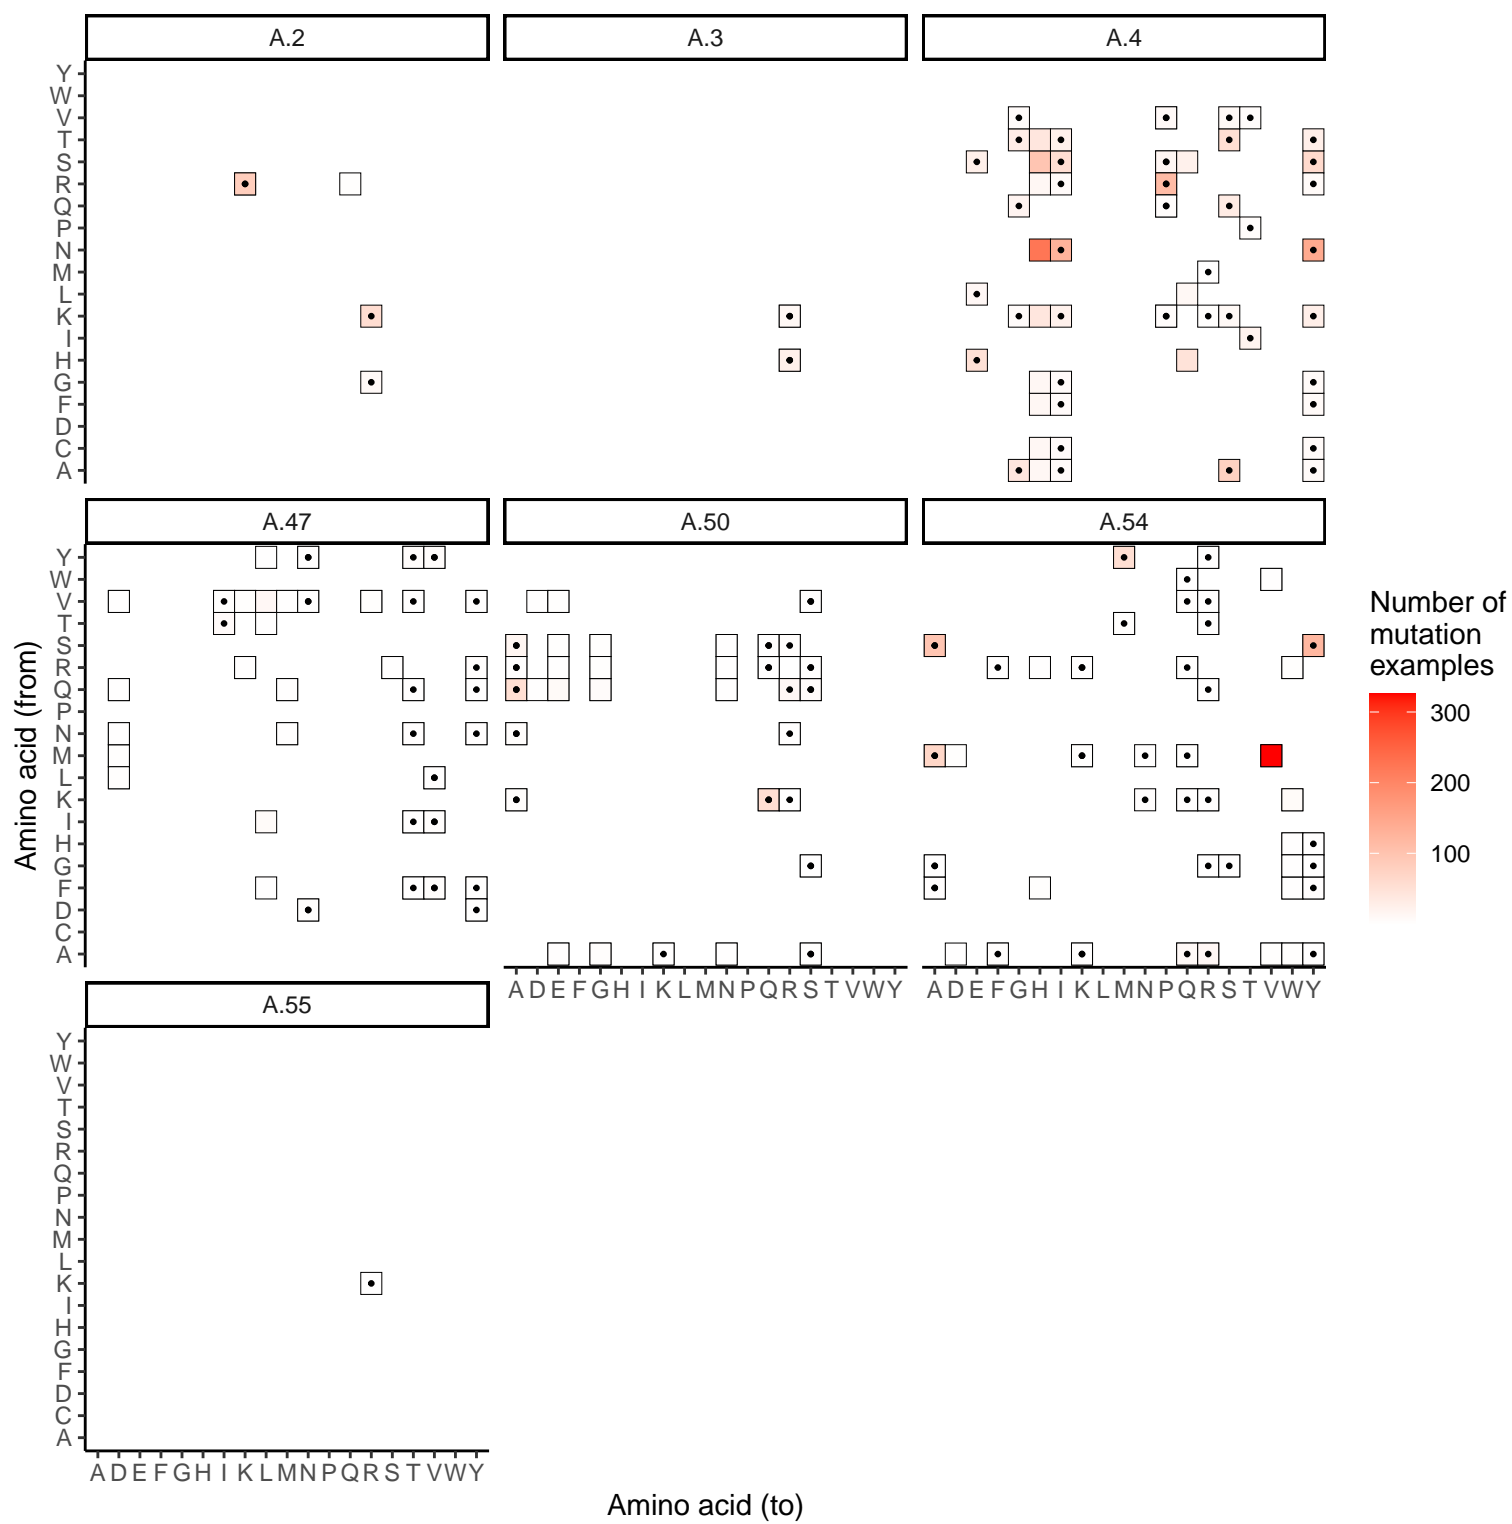

Supplement: SUPPLEMENTAL_Matl.zip [file nMutsHD-1_test_train_nObsge10.pdf › SUPPLEMENTAL_Matl/rCLAMPS/hd1-explore/0_splitChu2012-trainTest/nMutsHD-1_test_train_nObsge10.pdf]

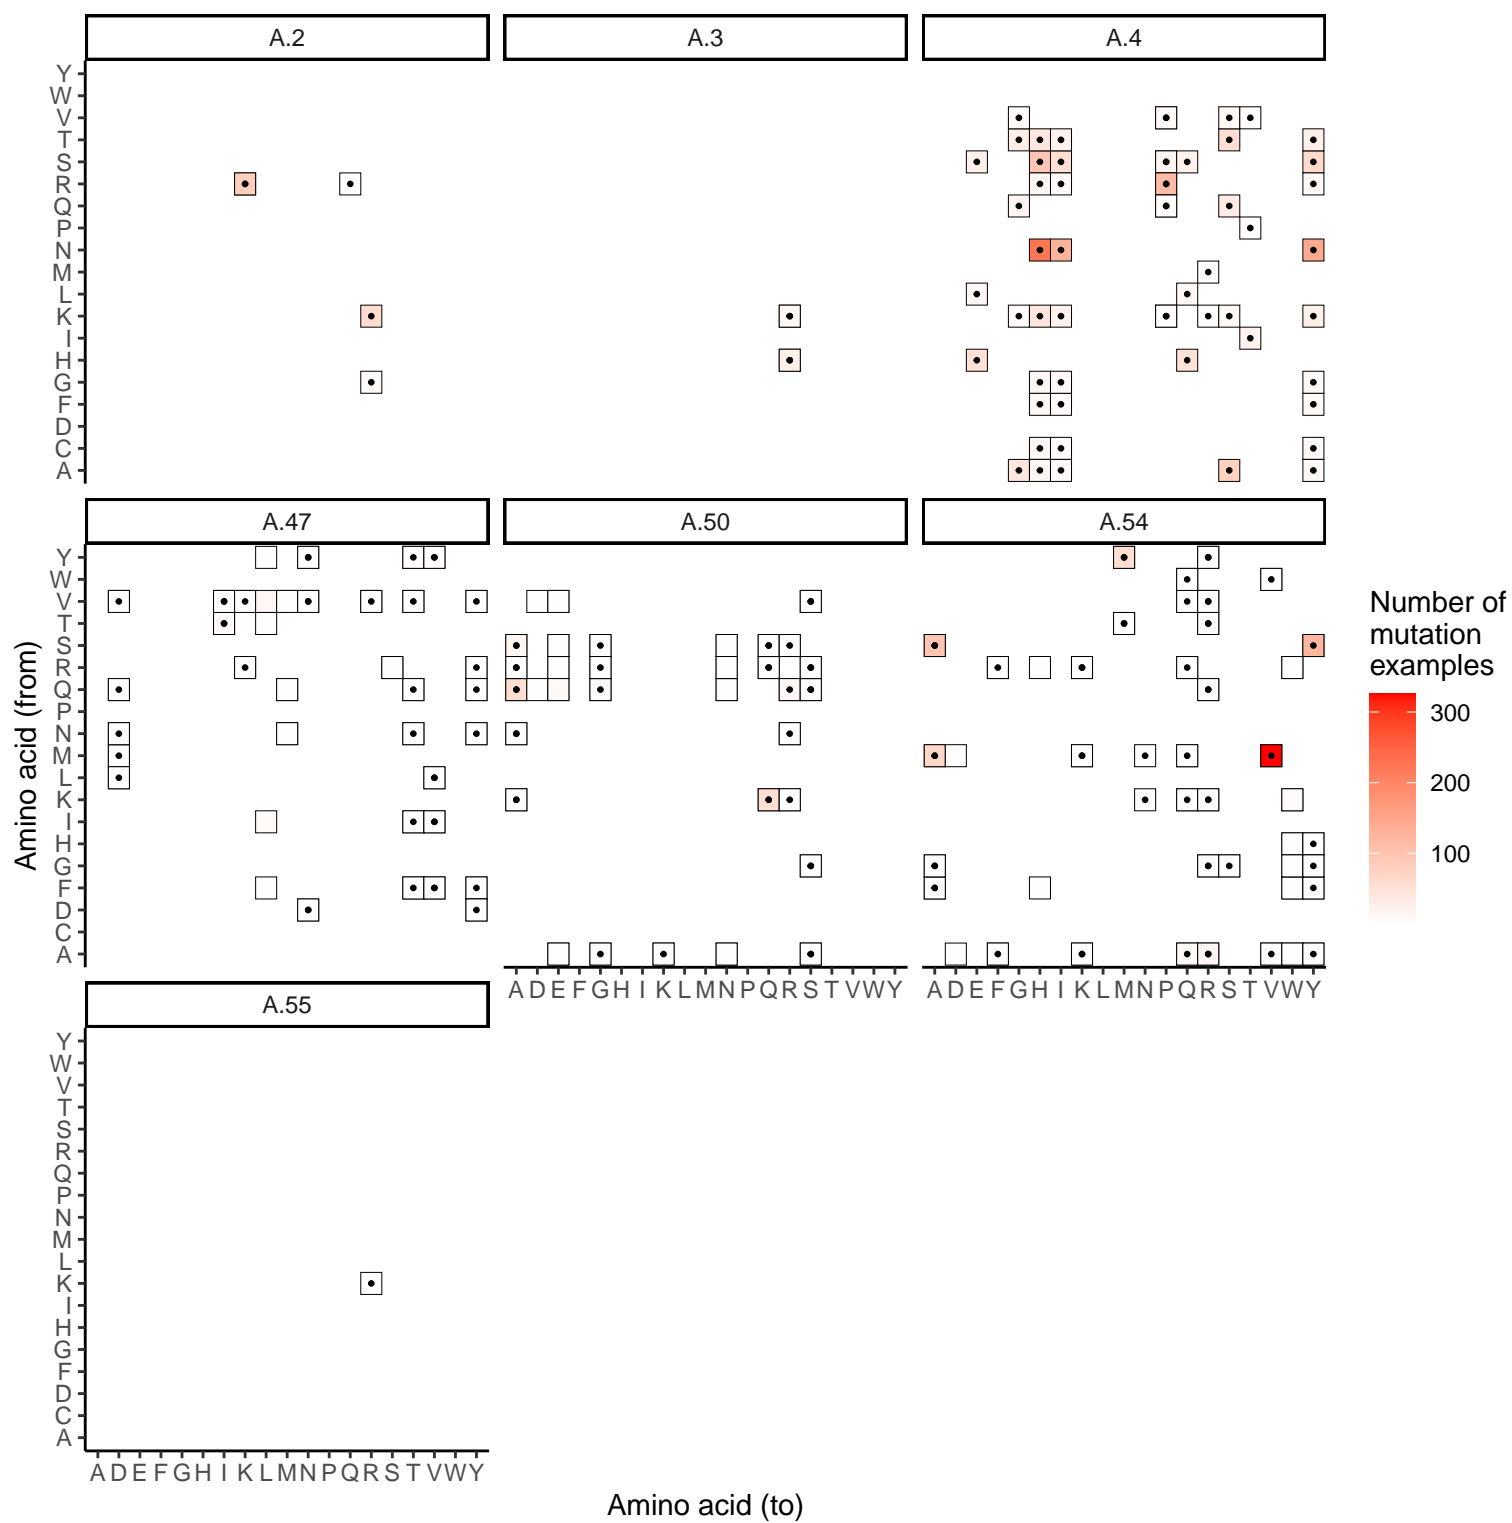

Supplement: SUPPLEMENTAL_Matl.zip [file nMutsHD-1_test_train_nObsge5.pdf › SUPPLEMENTAL_Matl/rCLAMPS/hd1-explore/0_splitChu2012-trainTest/nMutsHD-1_test_train_nObsge5.pdf]

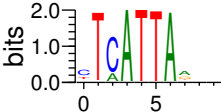

WebLogo 3.6.0

Supplement: SUPPLEMENTAL_Matl.zip [file 11_TGA_KSVAQ_0.pdf › SUPPLEMENTAL_Matl/rCLAMPS/hd1-explore/testSetLogos/11_TGA_KSVAQ_0.pdf]

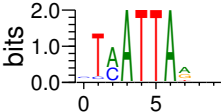

Supplement: SUPPLEMENTAL_Matl.zip [file 12_TGA_RGVAA_1.pdf › SUPPLEMENTAL_Matl/rCLAMPS/hd1-explore/testSetLogos/12_TGA_RGVAA_1.pdf]

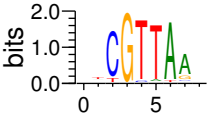

WebLogo 3.6.0

Supplement: SUPPLEMENTAL_Matl.zip [file 168_ACG_SRYDR_2.pdf › SUPPLEMENTAL_Matl/rCLAMPS/hd1-explore/testSetLogos/168_ACG_SRYDR_2.pdf]

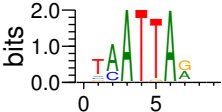

WebLogo 3.6.0

Supplement: SUPPLEMENTAL_Matl.zip [file 1_TTT_RTVAA_3.pdf › SUPPLEMENTAL_Matl/rCLAMPS/hd1-explore/testSetLogos/1_TTT_RTVAA_3.pdf]

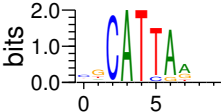

WebLogo 3.6.0

Supplement: SUPPLEMENTAL_Matl.zip [file 201_TGC_VRVSQ_4.pdf › SUPPLEMENTAL_Matl/rCLAMPS/hd1-explore/testSetLogos/201_TGC_VRVSQ_4.pdf]

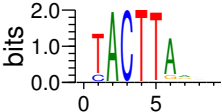

WebLogo 3.6.0

Supplement: SUPPLEMENTAL_Matl.zip [file 202_GTG_NAREF_5.pdf › SUPPLEMENTAL_Matl/rCLAMPS/hd1-explore/testSetLogos/202_GTG_NAREF_5.pdf]

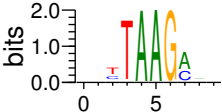

WebLogo 3.6.0

Supplement: SUPPLEMENTAL_Matl.zip [file 204_GCG_RTDRY_6.pdf › SUPPLEMENTAL_Matl/rCLAMPS/hd1-explore/testSetLogos/204_GCG_RTDRY_6.pdf]

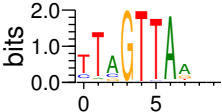

Supplement: SUPPLEMENTAL_Matl.zip [file 207_CTT_ITYGK_7.pdf › SUPPLEMENTAL_Matl/rCLAMPS/hd1-explore/testSetLogos/207_CTT_ITYGK_7.pdf]

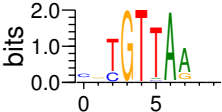

WebLogo 3.6.0

Supplement: SUPPLEMENTAL_Matl.zip [file 209_CGC_PRDSR_8.pdf › SUPPLEMENTAL_Matl/rCLAMPS/hd1-explore/testSetLogos/209_CGC_PRDSR_8.pdf]

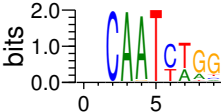

WebLogo 3.6.0

Supplement: SUPPLEMENTAL_Matl.zip [file 211_ATT_TKNQN_9.pdf › SUPPLEMENTAL_Matl/rCLAMPS/hd1-explore/testSetLogos/211_ATT_TKNQN_9.pdf]

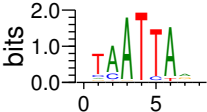

WebLogo 3.6.0

Supplement: SUPPLEMENTAL_Matl.zip [file 212_ATA_RVTNA_10.pdf › SUPPLEMENTAL_Matl/rCLAMPS/hd1-explore/testSetLogos/212_ATA_RVTNA_10.pdf]

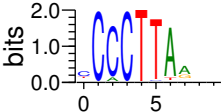

WebLogo 3.6.0

Supplement: SUPPLEMENTAL_Matl.zip [file 213_AGG_KMKES_11.pdf › SUPPLEMENTAL_Matl/rCLAMPS/hd1-explore/testSetLogos/213_AGG_KMKES_11.pdf]

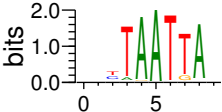

Supplement: SUPPLEMENTAL_Matl.zip [file 215_TTC_KRLAA_12.pdf › SUPPLEMENTAL_Matl/rCLAMPS/hd1-explore/testSetLogos/215_TTC_KRLAA_12.pdf]

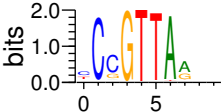

Supplement: SUPPLEMENTAL_Matl.zip [file 219_CTG_KVYER_13.pdf › SUPPLEMENTAL_Matl/rCLAMPS/hd1-explore/testSetLogos/219_CTG_KVYER_13.pdf]

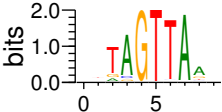

WebLogo 3.6.0

Supplement: SUPPLEMENTAL_Matl.zip [file 222_CTC_SKYGK_14.pdf › SUPPLEMENTAL_Matl/rCLAMPS/hd1-explore/testSetLogos/222_CTC_SKYGK_14.pdf]

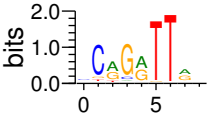

WebLogo 3.6.0

Supplement: SUPPLEMENTAL_Matl.zip [file 224_CCC_IMNSK_15.pdf › SUPPLEMENTAL_Matl/rCLAMPS/hd1-explore/testSetLogos/224_CCC_IMNSK_15.pdf]

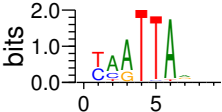

Supplement: SUPPLEMENTAL_Matl.zip [file 228_TTG_KMLQA_16.pdf › SUPPLEMENTAL_Matl/rCLAMPS/hd1-explore/testSetLogos/228_TTG_KMLQA_16.pdf]

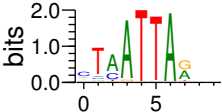

WebLogo 3.6.0

Supplement: SUPPLEMENTAL_Matl.zip [file 22_TAA_RITAA_17.pdf › SUPPLEMENTAL_Matl/rCLAMPS/hd1-explore/testSetLogos/22_TAA_RITAA_17.pdf]

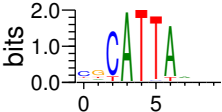

WebLogo 3.6.0

Supplement: SUPPLEMENTAL_Matl.zip [file 230_TGC_ERISQ_18.pdf › SUPPLEMENTAL_Matl/rCLAMPS/hd1-explore/testSetLogos/230_TGC_ERISQ_18.pdf]

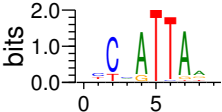

Supplement: SUPPLEMENTAL_Matl.zip [file 233_TCG_VMNQQ_19.pdf › SUPPLEMENTAL_Matl/rCLAMPS/hd1-explore/testSetLogos/233_TCG_VMNQQ_19.pdf]

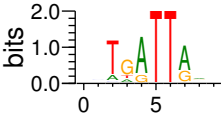

WebLogo 3.6.0

Supplement: SUPPLEMENTAL_Matl.zip [file 234_TCA_AMVQR_20.pdf › SUPPLEMENTAL_Matl/rCLAMPS/hd1-explore/testSetLogos/234_TCA_AMVQR_20.pdf]

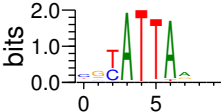

WebLogo 3.6.0

Supplement: SUPPLEMENTAL_Matl.zip [file 238_TAC_QRISV_21.pdf › SUPPLEMENTAL_Matl/rCLAMPS/hd1-explore/testSetLogos/238_TAC_QRISV_21.pdf]

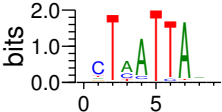

Supplement: SUPPLEMENTAL_Matl.zip [file 239_TAA_RTVRA_22.pdf › SUPPLEMENTAL_Matl/rCLAMPS/hd1-explore/testSetLogos/239_TAA_RTVRA_22.pdf]

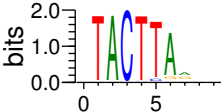

WebLogo 3.6.0

Supplement: SUPPLEMENTAL_Matl.zip [file 23_GTT_GTRAY_23.pdf › SUPPLEMENTAL_Matl/rCLAMPS/hd1-explore/testSetLogos/23_GTT_GTRAY_23.pdf]

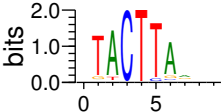

WebLogo 3.6.0

Supplement: SUPPLEMENTAL_Matl.zip [file 240_GTT_SSRGF_24.pdf › SUPPLEMENTAL_Matl/rCLAMPS/hd1-explore/testSetLogos/240_GTT_SSRGF_24.pdf]

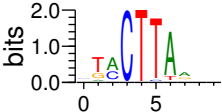

Supplement: SUPPLEMENTAL_Matl.zip [file 244_GGT_KMKSV_25.pdf › SUPPLEMENTAL_Matl/rCLAMPS/hd1-explore/testSetLogos/244_GGT_KMKSV_25.pdf]

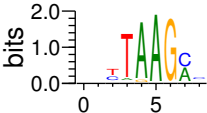

WebLogo 3.6.0

Supplement: SUPPLEMENTAL_Matl.zip [file 245_GCT_RAVKW_26.pdf › SUPPLEMENTAL_Matl/rCLAMPS/hd1-explore/testSetLogos/245_GCT_RAVKW_26.pdf]

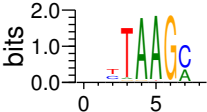

WebLogo 3.6.0

Supplement: SUPPLEMENTAL_Matl.zip [file 246_GCT_ISVKY_27.pdf › SUPPLEMENTAL_Matl/rCLAMPS/hd1-explore/testSetLogos/246_GCT_ISVKY_27.pdf]

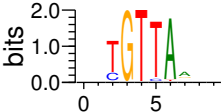

WebLogo 3.6.0

Supplement: SUPPLEMENTAL_Matl.zip [file 251_CTT_VGYSR_28.pdf › SUPPLEMENTAL_Matl/rCLAMPS/hd1-explore/testSetLogos/251_CTT_VGYSR_28.pdf]

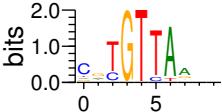

WebLogo 3.6.0

Supplement: SUPPLEMENTAL_Matl.zip [file 257_CAT_KLCSR_29.pdf › SUPPLEMENTAL_Matl/rCLAMPS/hd1-explore/testSetLogos/257_CAT_KLCSR_29.pdf]

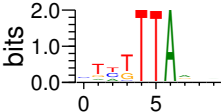

WebLogo 3.6.0

Supplement: SUPPLEMENTAL_Matl.zip [file 259_ATA_KMYAW_30.pdf › SUPPLEMENTAL_Matl/rCLAMPS/hd1-explore/testSetLogos/259_ATA_KMYAW_30.pdf]

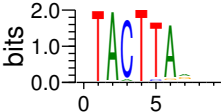

WebLogo 3.6.0

Supplement: SUPPLEMENTAL_Matl.zip [file 25_GTA_YTRQV_31.pdf › SUPPLEMENTAL_Matl/rCLAMPS/hd1-explore/testSetLogos/25_GTA_YTRQV_31.pdf]

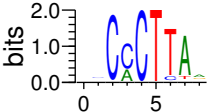

WebLogo 3.6.0

Supplement: SUPPLEMENTAL_Matl.zip [file 261_AGG_KSKEA_32.pdf › SUPPLEMENTAL_Matl/rCLAMPS/hd1-explore/testSetLogos/261_AGG_KSKEA_32.pdf]
