# Supplementary figures and images for: Learning probabilistic protein–DNA recognition codes from DNA-binding specificities using structural mappings (part 10 of 25)
Source: HighWire-hosted journal article supplement (doi:10.1101/gr.276606.122), 2022-09-01

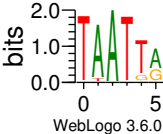

Supplement: SUPPLEMENTAL_Matl.zip [file ftz_KRTRIQNMK.pdf › SUPPLEMENTAL_Matl/rCLAMPS/STAMP/alignedLogos_NoyesGrps/logos_1/ftz_KRTRIQNMK.pdf]



Supplement: SUPPLEMENTAL_Matl.zip [file ftz_KRTRIQNMK_545.pdf › SUPPLEMENTAL_Matl/rCLAMPS/STAMP/alignedLogos_NoyesGrps/logos_1/ftz_KRTRIQNMK_545.pdf]

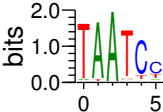

WebLogo 3.6.0

Supplement: SUPPLEMENTAL_Matl.zip [file gsc_RRHRVKNAK_546.pdf › SUPPLEMENTAL_Matl/rCLAMPS/STAMP/alignedLogos_NoyesGrps/logos_1/gsc_RRHRVKNAK_546.pdf]

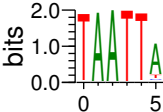

WebLogo 3.6.0

Supplement: SUPPLEMENTAL_Matl.zip [file hbn_RRSRVQNAK.pdf › SUPPLEMENTAL_Matl/rCLAMPS/STAMP/alignedLogos_NoyesGrps/logos_1/hbn_RRSRVQNAK.pdf]

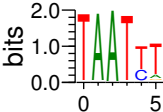

WebLogo 3.6.0

Supplement: SUPPLEMENTAL_Matl.zip [file hbn_RRSRVQNAK_547.pdf › SUPPLEMENTAL_Matl/rCLAMPS/STAMP/alignedLogos_NoyesGrps/logos_1/hbn_RRSRVQNAK_547.pdf]

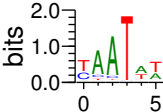

WebLogo 3.6.0

Supplement: SUPPLEMENTAL_Matl.zip [file hbx10_KKKRIQNAK.pdf › SUPPLEMENTAL_Matl/rCLAMPS/STAMP/alignedLogos_NoyesGrps/logos_1/hbx10_KKKRIQNAK.pdf]



WebLogo 3.6.0

Supplement: SUPPLEMENTAL_Matl.zip [file hbx10_KKKRIQNAK_548.pdf › SUPPLEMENTAL_Matl/rCLAMPS/STAMP/alignedLogos_NoyesGrps/logos_1/hbx10_KKKRIQNAK_548.pdf]

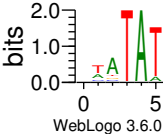

Supplement: SUPPLEMENTAL_Matl.zip [file hbx2_KKRRTSNQE.pdf › SUPPLEMENTAL_Matl/rCLAMPS/STAMP/alignedLogos_NoyesGrps/logos_1/hbx2_KKRRTSNQE.pdf]



Supplement: SUPPLEMENTAL_Matl.zip [file hbx2_KKRRTSNQE_549.pdf › SUPPLEMENTAL_Matl/rCLAMPS/STAMP/alignedLogos_NoyesGrps/logos_1/hbx2_KKRRTSNQE_549.pdf]

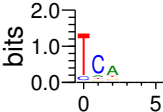

Supplement: SUPPLEMENTAL_Matl.zip [file hbx4_PKKGNINRR.pdf › SUPPLEMENTAL_Matl/rCLAMPS/STAMP/alignedLogos_NoyesGrps/logos_1/hbx4_PKKGNINRR.pdf]

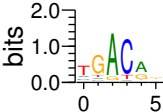

WebLogo 3.6.0

Supplement: SUPPLEMENTAL_Matl.zip [file hbx4_PKKGNINRR_550.pdf › SUPPLEMENTAL_Matl/rCLAMPS/STAMP/alignedLogos_NoyesGrps/logos_1/hbx4_PKKGNINRR_550.pdf]

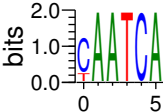

WebLogo 3.6.0

Supplement: SUPPLEMENTAL_Matl.zip [file hbx5-1_SRRKVQNAR.pdf › SUPPLEMENTAL_Matl/rCLAMPS/STAMP/alignedLogos_NoyesGrps/logos_1/hbx5-1_SRRKVQNAR.pdf]



WebLogo 3.6.0

Supplement: SUPPLEMENTAL_Matl.zip [file hbx5-1_SRRKVQNAR_551.pdf › SUPPLEMENTAL_Matl/rCLAMPS/STAMP/alignedLogos_NoyesGrps/logos_1/hbx5-1_SRRKVQNAR_551.pdf]

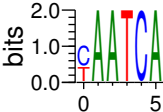

WebLogo 3.6.0

Supplement: SUPPLEMENTAL_Matl.zip [file hbx5-2_SRRKVQNAR.pdf › SUPPLEMENTAL_Matl/rCLAMPS/STAMP/alignedLogos_NoyesGrps/logos_1/hbx5-2_SRRKVQNAR.pdf]



WebLogo 3.6.0

Supplement: SUPPLEMENTAL_Matl.zip [file hbx5-2_SRRKVQNAR_552.pdf › SUPPLEMENTAL_Matl/rCLAMPS/STAMP/alignedLogos_NoyesGrps/logos_1/hbx5-2_SRRKVQNAR_552.pdf]

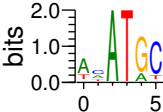

WebLogo 3.6.0

Supplement: SUPPLEMENTAL_Matl.zip [file hbx7_NIRNNKGDR_553.pdf › SUPPLEMENTAL_Matl/rCLAMPS/STAMP/alignedLogos_NoyesGrps/logos_1/hbx7_NIRNNKGDR_553.pdf]

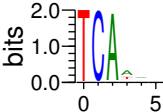

Supplement: SUPPLEMENTAL_Matl.zip [file hbx9_RKKRNTNRR.pdf › SUPPLEMENTAL_Matl/rCLAMPS/STAMP/alignedLogos_NoyesGrps/logos_1/hbx9_RKKRNTNRR.pdf]

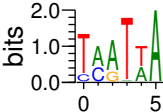

Supplement: SUPPLEMENTAL_Matl.zip [file hox12_RRRRIQNMK.pdf › SUPPLEMENTAL_Matl/rCLAMPS/STAMP/alignedLogos_NoyesGrps/logos_1/hox12_RRRRIQNMK.pdf]

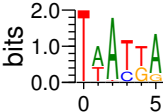

WebLogo 3.6.0

Supplement: SUPPLEMENTAL_Matl.zip [file hox12_RRRRIQNMK_554.pdf › SUPPLEMENTAL_Matl/rCLAMPS/STAMP/alignedLogos_NoyesGrps/logos_1/hox12_RRRRIQNMK_554.pdf]

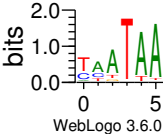

Supplement: SUPPLEMENTAL_Matl.zip [file hoxd13a_RKKRIQNVK.pdf › SUPPLEMENTAL_Matl/rCLAMPS/STAMP/alignedLogos_NoyesGrps/logos_1/hoxd13a_RKKRIQNVK.pdf]

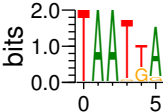

Supplement: SUPPLEMENTAL_Matl.zip [file ind_KRIRIQNVK.pdf › SUPPLEMENTAL_Matl/rCLAMPS/STAMP/alignedLogos_NoyesGrps/logos_1/ind_KRIRIQNVK.pdf]



Supplement: SUPPLEMENTAL_Matl.zip [file ind_KRIRIQNVK_555.pdf › SUPPLEMENTAL_Matl/rCLAMPS/STAMP/alignedLogos_NoyesGrps/logos_1/ind_KRIRIQNVK_555.pdf]

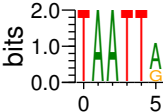

WebLogo 3.6.0

Supplement: SUPPLEMENTAL_Matl.zip [file inv_KRPRIQNAK.pdf › SUPPLEMENTAL_Matl/rCLAMPS/STAMP/alignedLogos_NoyesGrps/logos_1/inv_KRPRIQNAK.pdf]



WebLogo 3.6.0

Supplement: SUPPLEMENTAL_Matl.zip [file inv_KRPRIQNAK_556.pdf › SUPPLEMENTAL_Matl/rCLAMPS/STAMP/alignedLogos_NoyesGrps/logos_1/inv_KRPRIQNAK_556.pdf]

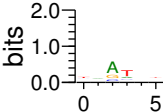

Supplement: SUPPLEMENTAL_Matl.zip [file kal-1_NQKRIQNAK.pdf › SUPPLEMENTAL_Matl/rCLAMPS/STAMP/alignedLogos_NoyesGrps/logos_1/kal-1_NQKRIQNAK.pdf]



WebLogo 3.6.0

Supplement: SUPPLEMENTAL_Matl.zip [file kal-1_NQKRIQNAK_557.pdf › SUPPLEMENTAL_Matl/rCLAMPS/STAMP/alignedLogos_NoyesGrps/logos_1/kal-1_NQKRIQNAK_557.pdf]

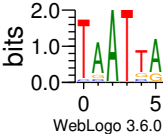

Supplement: SUPPLEMENTAL_Matl.zip [file lab_NSGRIQNMK.pdf › SUPPLEMENTAL_Matl/rCLAMPS/STAMP/alignedLogos_NoyesGrps/logos_1/lab_NSGRIQNMK.pdf]



Supplement: SUPPLEMENTAL_Matl.zip [file lab_NSGRIQNMK_558.pdf › SUPPLEMENTAL_Matl/rCLAMPS/STAMP/alignedLogos_NoyesGrps/logos_1/lab_NSGRIQNMK_558.pdf]

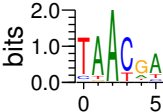

WebLogo 3.6.0

Supplement: SUPPLEMENTAL_Matl.zip [file lbe_RKSRTQNAK.pdf › SUPPLEMENTAL_Matl/rCLAMPS/STAMP/alignedLogos_NoyesGrps/logos_1/lbe_RKSRTQNAK.pdf]



WebLogo 3.6.0

Supplement: SUPPLEMENTAL_Matl.zip [file lbe_RKSRTQNAK_559.pdf › SUPPLEMENTAL_Matl/rCLAMPS/STAMP/alignedLogos_NoyesGrps/logos_1/lbe_RKSRTQNAK_559.pdf]

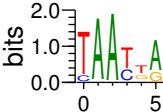

WebLogo 3.6.0

Supplement: SUPPLEMENTAL_Matl.zip [file lbl_RKSRTQNAK.pdf › SUPPLEMENTAL_Matl/rCLAMPS/STAMP/alignedLogos_NoyesGrps/logos_1/lbl_RKSRTQNAK.pdf]



WebLogo 3.6.0

Supplement: SUPPLEMENTAL_Matl.zip [file lbl_RKSRTQNAK_560.pdf › SUPPLEMENTAL_Matl/rCLAMPS/STAMP/alignedLogos_NoyesGrps/logos_1/lbl_RKSRTQNAK_560.pdf]

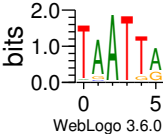

Supplement: SUPPLEMENTAL_Matl.zip [file lim-4_KRVRVQNAR.pdf › SUPPLEMENTAL_Matl/rCLAMPS/STAMP/alignedLogos_NoyesGrps/logos_1/lim-4_KRVRVQNAR.pdf]

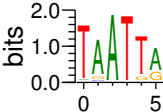

WebLogo 3.6.0

Supplement: SUPPLEMENTAL_Matl.zip [file lim-4_KRVRVQNAR_561.pdf › SUPPLEMENTAL_Matl/rCLAMPS/STAMP/alignedLogos_NoyesGrps/logos_1/lim-4_KRVRVQNAR_561.pdf]

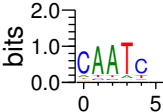

WebLogo 3.6.0

Supplement: SUPPLEMENTAL_Matl.zip [file lin-39_KRQRIQNMK_562.pdf › SUPPLEMENTAL_Matl/rCLAMPS/STAMP/alignedLogos_NoyesGrps/logos_1/lin-39_KRQRIQNMK_562.pdf]

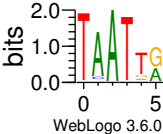

Supplement: SUPPLEMENTAL_Matl.zip [file lms_KRPRIQNTK.pdf › SUPPLEMENTAL_Matl/rCLAMPS/STAMP/alignedLogos_NoyesGrps/logos_1/lms_KRPRIQNTK.pdf]



Supplement: SUPPLEMENTAL_Matl.zip [file lms_KRPRIQNTK_563.pdf › SUPPLEMENTAL_Matl/rCLAMPS/STAMP/alignedLogos_NoyesGrps/logos_1/lms_KRPRIQNTK_563.pdf]

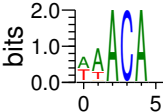

WebLogo 3.6.0

Supplement: SUPPLEMENTAL_Matl.zip [file mirr_GARRTANRR_564.pdf › SUPPLEMENTAL_Matl/rCLAMPS/STAMP/alignedLogos_NoyesGrps/logos_1/mirr_GARRTANRR_564.pdf]

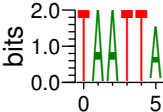

WebLogo 3.6.0

Supplement: SUPPLEMENTAL_Matl.zip [file mixl1.S_RRKRVQNAK.pdf › SUPPLEMENTAL_Matl/rCLAMPS/STAMP/alignedLogos_NoyesGrps/logos_1/mixl1.S_RRKRVQNAK.pdf]



WebLogo 3.6.0

Supplement: SUPPLEMENTAL_Matl.zip [file mixl1.S_RRKRVQNAK_565.pdf › SUPPLEMENTAL_Matl/rCLAMPS/STAMP/alignedLogos_NoyesGrps/logos_1/mixl1.S_RRKRVQNAK_565.pdf]

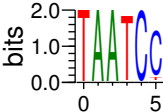

WebLogo 3.6.0

Supplement: SUPPLEMENTAL_Matl.zip [file oc_RRERVKNAK.pdf › SUPPLEMENTAL_Matl/rCLAMPS/STAMP/alignedLogos_NoyesGrps/logos_1/oc_RRERVKNAK.pdf]

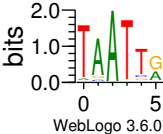

Supplement: SUPPLEMENTAL_Matl.zip [file otp_KRHRVQNAK_566.pdf › SUPPLEMENTAL_Matl/rCLAMPS/STAMP/alignedLogos_NoyesGrps/logos_1/otp_KRHRVQNAK_566.pdf]

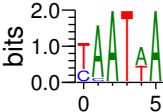

WebLogo 3.6.0

Supplement: SUPPLEMENTAL_Matl.zip [file pal-1_DKYRIQNAK.pdf › SUPPLEMENTAL_Matl/rCLAMPS/STAMP/alignedLogos_NoyesGrps/logos_1/pal-1_DKYRIQNAK.pdf]



WebLogo 3.6.0

Supplement: SUPPLEMENTAL_Matl.zip [file pal-1_DKYRIQNAK_567.pdf › SUPPLEMENTAL_Matl/rCLAMPS/STAMP/alignedLogos_NoyesGrps/logos_1/pal-1_DKYRIQNAK_567.pdf]

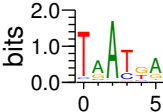

WebLogo 3.6.0

Supplement: SUPPLEMENTAL_Matl.zip [file pb_RRLRVQNMK.pdf › SUPPLEMENTAL_Matl/rCLAMPS/STAMP/alignedLogos_NoyesGrps/logos_1/pb_RRLRVQNMK.pdf]



WebLogo 3.6.0

Supplement: SUPPLEMENTAL_Matl.zip [file pb_RRLRVQNMK_568.pdf › SUPPLEMENTAL_Matl/rCLAMPS/STAMP/alignedLogos_NoyesGrps/logos_1/pb_RRLRVQNMK_568.pdf]

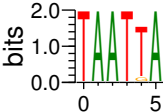

WebLogo 3.6.0

Supplement: SUPPLEMENTAL_Matl.zip [file pdm3_RKRRICNQA.pdf › SUPPLEMENTAL_Matl/rCLAMPS/STAMP/alignedLogos_NoyesGrps/logos_1/pdm3_RKRRICNQA.pdf]



WebLogo 3.6.0

Supplement: SUPPLEMENTAL_Matl.zip [file pdm3_RKRRICNQA_569.pdf › SUPPLEMENTAL_Matl/rCLAMPS/STAMP/alignedLogos_NoyesGrps/logos_1/pdm3_RKRRICNQA_569.pdf]

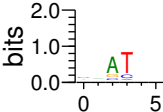

WebLogo 3.6.0

Supplement: SUPPLEMENTAL_Matl.zip [file pha-2_KGGQTQNAK.pdf › SUPPLEMENTAL_Matl/rCLAMPS/STAMP/alignedLogos_NoyesGrps/logos_1/pha-2_KGGQTQNAK.pdf]



WebLogo 3.6.0

Supplement: SUPPLEMENTAL_Matl.zip [file pha-2_KGGQTQNAK_570.pdf › SUPPLEMENTAL_Matl/rCLAMPS/STAMP/alignedLogos_NoyesGrps/logos_1/pha-2_KGGQTQNAK_570.pdf]

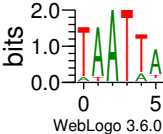

Supplement: SUPPLEMENTAL_Matl.zip [file phx1_KSKKIQNAK_571.pdf › SUPPLEMENTAL_Matl/rCLAMPS/STAMP/alignedLogos_NoyesGrps/logos_1/phx1_KSKKIQNAK_571.pdf]

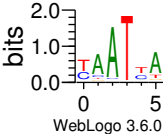

Supplement: SUPPLEMENTAL_Matl.zip [file prd-b_SRGRIQNAR.pdf › SUPPLEMENTAL_Matl/rCLAMPS/STAMP/alignedLogos_NoyesGrps/logos_1/prd-b_SRGRIQNAR.pdf]



Supplement: SUPPLEMENTAL_Matl.zip [file prd-b_SRGRIQNAR_572.pdf › SUPPLEMENTAL_Matl/rCLAMPS/STAMP/alignedLogos_NoyesGrps/logos_1/prd-b_SRGRIQNAR_572.pdf]

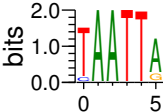

Supplement: SUPPLEMENTAL_Matl.zip [file repo_KKTRVQNAK.pdf › SUPPLEMENTAL_Matl/rCLAMPS/STAMP/alignedLogos_NoyesGrps/logos_1/repo_KKTRVQNAK.pdf]

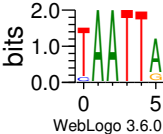

Supplement: SUPPLEMENTAL_Matl.zip [file repo_KKTRVQNAK_573.pdf › SUPPLEMENTAL_Matl/rCLAMPS/STAMP/alignedLogos_NoyesGrps/logos_1/repo_KKTRVQNAK_573.pdf]

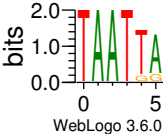

Supplement: SUPPLEMENTAL_Matl.zip [file ro_RRQRIQNAK.pdf › SUPPLEMENTAL_Matl/rCLAMPS/STAMP/alignedLogos_NoyesGrps/logos_1/ro_RRQRIQNAK.pdf]

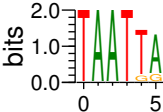

WebLogo 3.6.0

Supplement: SUPPLEMENTAL_Matl.zip [file ro_RRQRIQNAK_574.pdf › SUPPLEMENTAL_Matl/rCLAMPS/STAMP/alignedLogos_NoyesGrps/logos_1/ro_RRQRIQNAK_574.pdf]

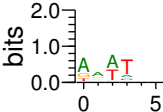

Supplement: SUPPLEMENTAL_Matl.zip [file schlank_IRSSRRLAQ_575.pdf › SUPPLEMENTAL_Matl/rCLAMPS/STAMP/alignedLogos_NoyesGrps/logos_1/schlank_IRSSRRLAQ_575.pdf]

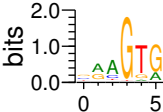

WebLogo 3.6.0

Supplement: SUPPLEMENTAL_Matl.zip [file scro_RKRRIQNYK.pdf › SUPPLEMENTAL_Matl/rCLAMPS/STAMP/alignedLogos_NoyesGrps/logos_1/scro_RKRRIQNYK.pdf]



WebLogo 3.6.0

Supplement: SUPPLEMENTAL_Matl.zip [file scro_RKRRIQNYK_576.pdf › SUPPLEMENTAL_Matl/rCLAMPS/STAMP/alignedLogos_NoyesGrps/logos_1/scro_RKRRIQNYK_576.pdf]

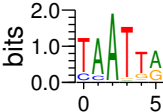

WebLogo 3.6.0

Supplement: SUPPLEMENTAL_Matl.zip [file slou_RRARIQNTK.pdf › SUPPLEMENTAL_Matl/rCLAMPS/STAMP/alignedLogos_NoyesGrps/logos_1/slou_RRARIQNTK.pdf]



WebLogo 3.6.0

Supplement: SUPPLEMENTAL_Matl.zip [file slou_RRARIQNTK_577.pdf › SUPPLEMENTAL_Matl/rCLAMPS/STAMP/alignedLogos_NoyesGrps/logos_1/slou_RRARIQNTK_577.pdf]

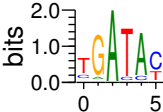

WebLogo 3.6.0

Supplement: SUPPLEMENTAL_Matl.zip [file so_EETSNKNQR_578.pdf › SUPPLEMENTAL_Matl/rCLAMPS/STAMP/alignedLogos_NoyesGrps/logos_1/so_EETSNKNQR_578.pdf]

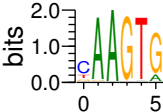

WebLogo 3.6.0

Supplement: SUPPLEMENTAL_Matl.zip [file tin_RKPRIQNYK.pdf › SUPPLEMENTAL_Matl/rCLAMPS/STAMP/alignedLogos_NoyesGrps/logos_1/tin_RKPRIQNYK.pdf]

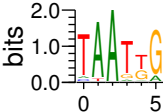

WebLogo 3.6.0

Supplement: SUPPLEMENTAL_Matl.zip [file tup_TRVRVQNCK.pdf › SUPPLEMENTAL_Matl/rCLAMPS/STAMP/alignedLogos_NoyesGrps/logos_1/tup_TRVRVQNCK.pdf]



WebLogo 3.6.0

Supplement: SUPPLEMENTAL_Matl.zip [file tup_TRVRVQNCK_579.pdf › SUPPLEMENTAL_Matl/rCLAMPS/STAMP/alignedLogos_NoyesGrps/logos_1/tup_TRVRVQNCK_579.pdf]

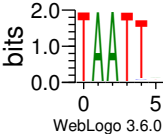

Supplement: SUPPLEMENTAL_Matl.zip [file unc-4_RRSRVQNAK.pdf › SUPPLEMENTAL_Matl/rCLAMPS/STAMP/alignedLogos_NoyesGrps/logos_1/unc-4_RRSRVQNAK.pdf]

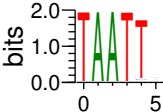

WebLogo 3.6.0

Supplement: SUPPLEMENTAL_Matl.zip [file unc-4_RRSRVQNAK_580.pdf › SUPPLEMENTAL_Matl/rCLAMPS/STAMP/alignedLogos_NoyesGrps/logos_1/unc-4_RRSRVQNAK_580.pdf]

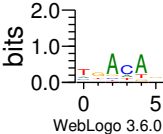

Supplement: SUPPLEMENTAL_Matl.zip [file unc-62_KVPKNINRR.pdf › SUPPLEMENTAL_Matl/rCLAMPS/STAMP/alignedLogos_NoyesGrps/logos_1/unc-62_KVPKNINRR.pdf]

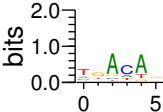

Supplement: SUPPLEMENTAL_Matl.zip [file unc-62_KVPKNINRR_581.pdf › SUPPLEMENTAL_Matl/rCLAMPS/STAMP/alignedLogos_NoyesGrps/logos_1/unc-62_KVPKNINRR_581.pdf]

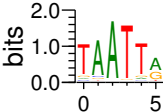

WebLogo 3.6.0

Supplement: SUPPLEMENTAL_Matl.zip [file uncx_RRTRVQNAK_582.pdf › SUPPLEMENTAL_Matl/rCLAMPS/STAMP/alignedLogos_NoyesGrps/logos_1/uncx_RRTRVQNAK_582.pdf]

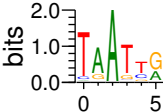

WebLogo 3.6.0

Supplement: SUPPLEMENTAL_Matl.zip [file unpg_RRRRIQNAK.pdf › SUPPLEMENTAL_Matl/rCLAMPS/STAMP/alignedLogos_NoyesGrps/logos_1/unpg_RRRRIQNAK.pdf]

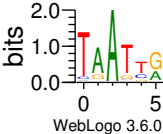

Supplement: SUPPLEMENTAL_Matl.zip [file unpg_RRRRIQNAK_583.pdf › SUPPLEMENTAL_Matl/rCLAMPS/STAMP/alignedLogos_NoyesGrps/logos_1/unpg_RRRRIQNAK_583.pdf]

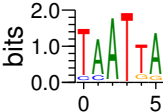

WebLogo 3.6.0

Supplement: SUPPLEMENTAL_Matl.zip [file vab-7_RRYRVQNMK.pdf › SUPPLEMENTAL_Matl/rCLAMPS/STAMP/alignedLogos_NoyesGrps/logos_1/vab-7_RRYRVQNMK.pdf]

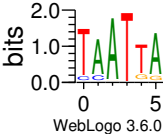

Supplement: SUPPLEMENTAL_Matl.zip [file vab-7_RRYRVQNMK_584.pdf › SUPPLEMENTAL_Matl/rCLAMPS/STAMP/alignedLogos_NoyesGrps/logos_1/vab-7_RRYRVQNMK_584.pdf]

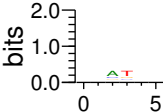

WebLogo 3.6.0

Supplement: SUPPLEMENTAL_Matl.zip [file ventx1.1.L_RHLRTQNMK.pdf › SUPPLEMENTAL_Matl/rCLAMPS/STAMP/alignedLogos_NoyesGrps/logos_1/ventx1.1.L_RHLRTQNMK.pdf]



WebLogo 3.6.0

Supplement: SUPPLEMENTAL_Matl.zip [file ventx1.1.L_RHLRTQNMK_585.pdf › SUPPLEMENTAL_Matl/rCLAMPS/STAMP/alignedLogos_NoyesGrps/logos_1/ventx1.1.L_RHLRTQNMK_585.pdf]

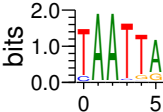

WebLogo 3.6.0

Supplement: SUPPLEMENTAL_Matl.zip [file ventx3.2_SRARTQNMK.pdf › SUPPLEMENTAL_Matl/rCLAMPS/STAMP/alignedLogos_NoyesGrps/logos_1/ventx3.2_SRARTQNMK.pdf]

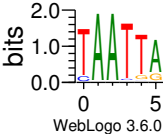

Supplement: SUPPLEMENTAL_Matl.zip [file ventx3.2_SRARTQNMK_586.pdf › SUPPLEMENTAL_Matl/rCLAMPS/STAMP/alignedLogos_NoyesGrps/logos_1/ventx3.2_SRARTQNMK_586.pdf]

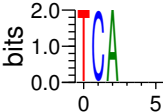

WebLogo 3.6.0

Supplement: SUPPLEMENTAL_Matl.zip [file vis_RKRRNINRR.pdf › SUPPLEMENTAL_Matl/rCLAMPS/STAMP/alignedLogos_NoyesGrps/logos_1/vis_RKRRNINRR.pdf]

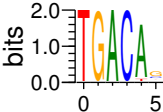

WebLogo 3.6.0

Supplement: SUPPLEMENTAL_Matl.zip [file vis_RKRRNINRR_587.pdf › SUPPLEMENTAL_Matl/rCLAMPS/STAMP/alignedLogos_NoyesGrps/logos_1/vis_RKRRNINRR_587.pdf]

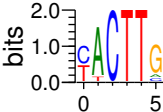

Supplement: SUPPLEMENTAL_Matl.zip [file vnd_RKRRIQNYK.pdf › SUPPLEMENTAL_Matl/rCLAMPS/STAMP/alignedLogos_NoyesGrps/logos_1/vnd_RKRRIQNYK.pdf]



Supplement: SUPPLEMENTAL_Matl.zip [file vnd_RKRRIQNYK_588.pdf › SUPPLEMENTAL_Matl/rCLAMPS/STAMP/alignedLogos_NoyesGrps/logos_1/vnd_RKRRIQNYK_588.pdf]

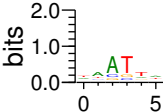

WebLogo 3.6.0

Supplement: SUPPLEMENTAL_Matl.zip [file yox1_KKRRIQNQS.pdf › SUPPLEMENTAL_Matl/rCLAMPS/STAMP/alignedLogos_NoyesGrps/logos_1/yox1_KKRRIQNQS.pdf]



WebLogo 3.6.0

Supplement: SUPPLEMENTAL_Matl.zip [file yox1_KKRRIQNQS_589.pdf › SUPPLEMENTAL_Matl/rCLAMPS/STAMP/alignedLogos_NoyesGrps/logos_1/yox1_KKRRIQNQS_589.pdf]

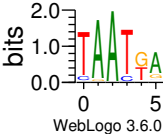

Supplement: SUPPLEMENTAL_Matl.zip [file zen2_KRSRIQNMK.pdf › SUPPLEMENTAL_Matl/rCLAMPS/STAMP/alignedLogos_NoyesGrps/logos_1/zen2_KRSRIQNMK.pdf]

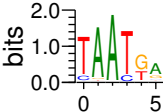

WebLogo 3.6.0

Supplement: SUPPLEMENTAL_Matl.zip [file zen_KRSRIQNMK.pdf › SUPPLEMENTAL_Matl/rCLAMPS/STAMP/alignedLogos_NoyesGrps/logos_1/zen_KRSRIQNMK.pdf]

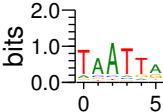

WebLogo 3.6.0

Supplement: SUPPLEMENTAL_Matl.zip [file zfhx4_KRFRVQNAK.pdf › SUPPLEMENTAL_Matl/rCLAMPS/STAMP/alignedLogos_NoyesGrps/logos_1/zfhx4_KRFRVQNAK.pdf]



WebLogo 3.6.0

Supplement: SUPPLEMENTAL_Matl.zip [file zfhx4_RSSRVQNQK_590.pdf › SUPPLEMENTAL_Matl/rCLAMPS/STAMP/alignedLogos_NoyesGrps/logos_1/zfhx4_RSSRVQNQK_590.pdf]

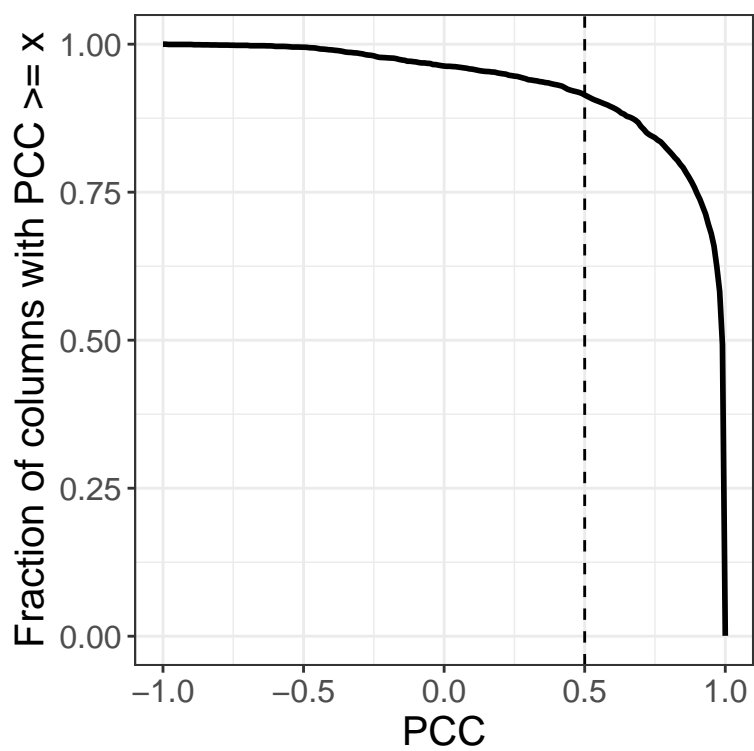

Supplement: SUPPLEMENTAL_Matl.zip [file Figure2_left.pdf › SUPPLEMENTAL_Matl/rCLAMPS/analysis_manuscript_plots/Figure2_left.pdf]

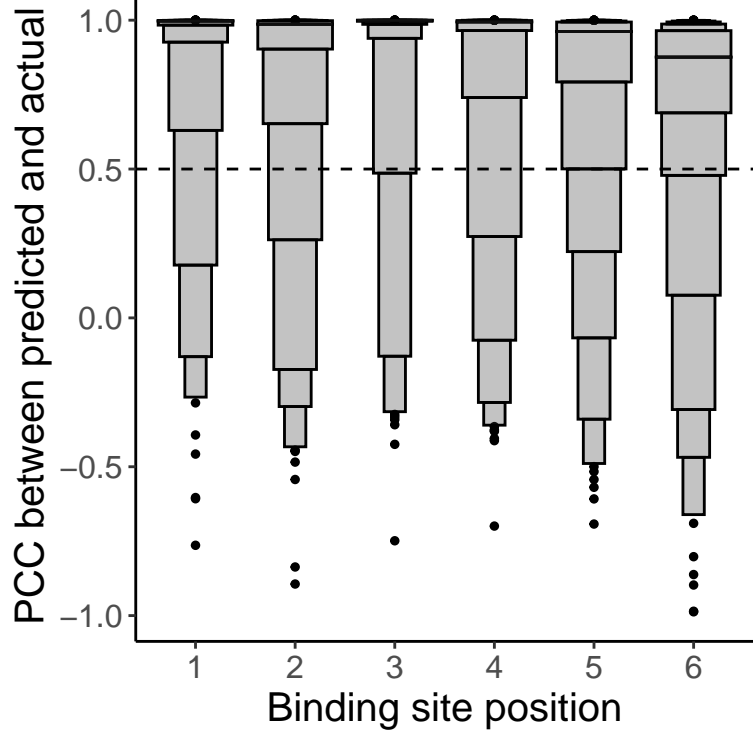

Supplement: SUPPLEMENTAL_Matl.zip [file Figure2_right.pdf › SUPPLEMENTAL_Matl/rCLAMPS/analysis_manuscript_plots/Figure2_right.pdf]

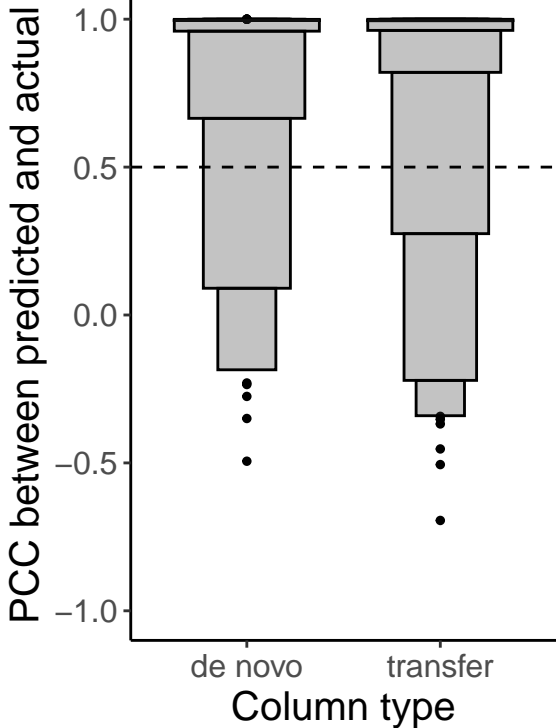

Supplement: SUPPLEMENTAL_Matl.zip [file Figure3_left.pdf › SUPPLEMENTAL_Matl/rCLAMPS/analysis_manuscript_plots/Figure3_left.pdf]

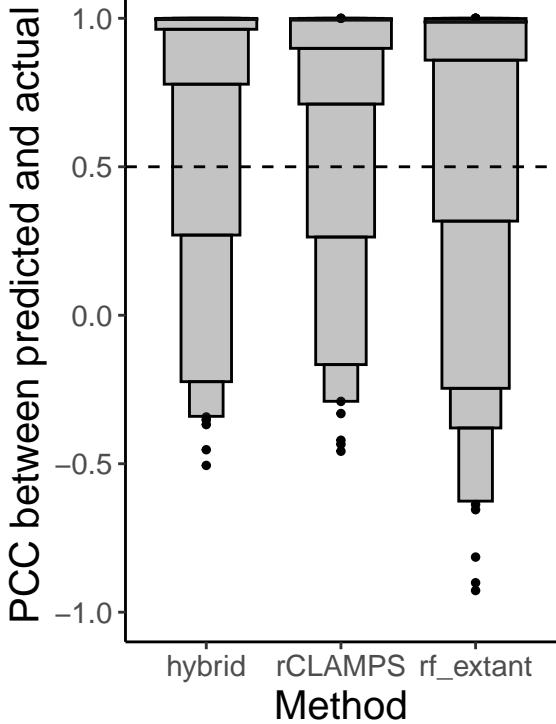

Supplement: SUPPLEMENTAL_Matl.zip [file Figure3_right.pdf › SUPPLEMENTAL_Matl/rCLAMPS/analysis_manuscript_plots/Figure3_right.pdf]

Fraction of correct mappings

1.00  
0.75  
0.50  
0.25  
0.00

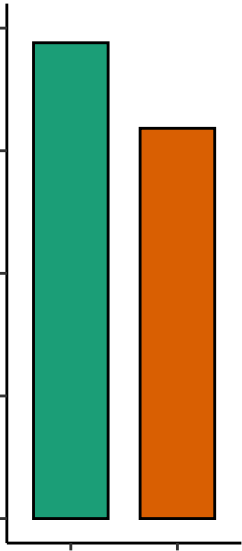

Supplement: SUPPLEMENTAL_Matl.zip [file Figure4_left.pdf › SUPPLEMENTAL_Matl/rCLAMPS/analysis_manuscript_plots/Figure4_left.pdf]

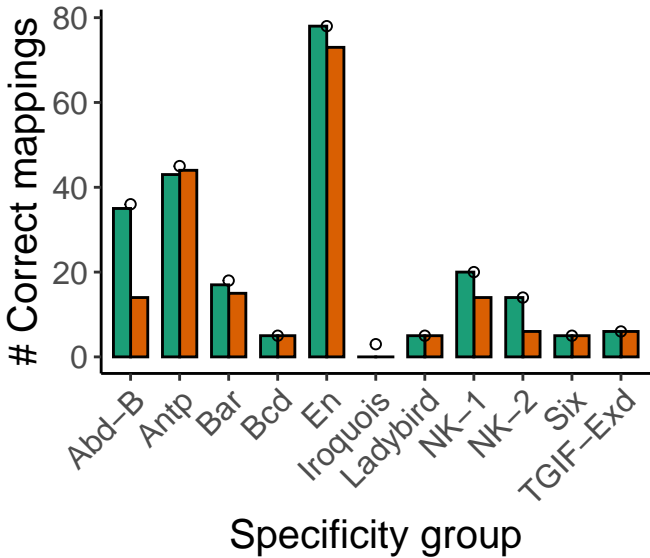

Supplement: SUPPLEMENTAL_Matl.zip [file Figure4_right.pdf › SUPPLEMENTAL_Matl/rCLAMPS/analysis_manuscript_plots/Figure4_right.pdf]

— model — rf\_extant

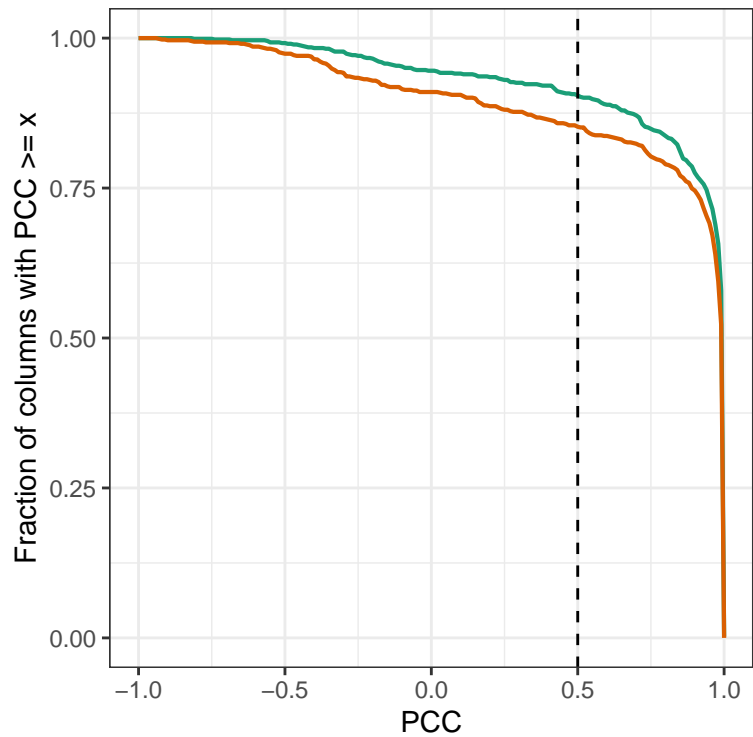

Supplement: SUPPLEMENTAL_Matl.zip [file pcc_fracGE_rf_extant_excludeTransfer.pdf › SUPPLEMENTAL_Matl/rCLAMPS/analysis_manuscript_plots/pcc_fracGE_rf_extant_excludeTransfer.pdf]

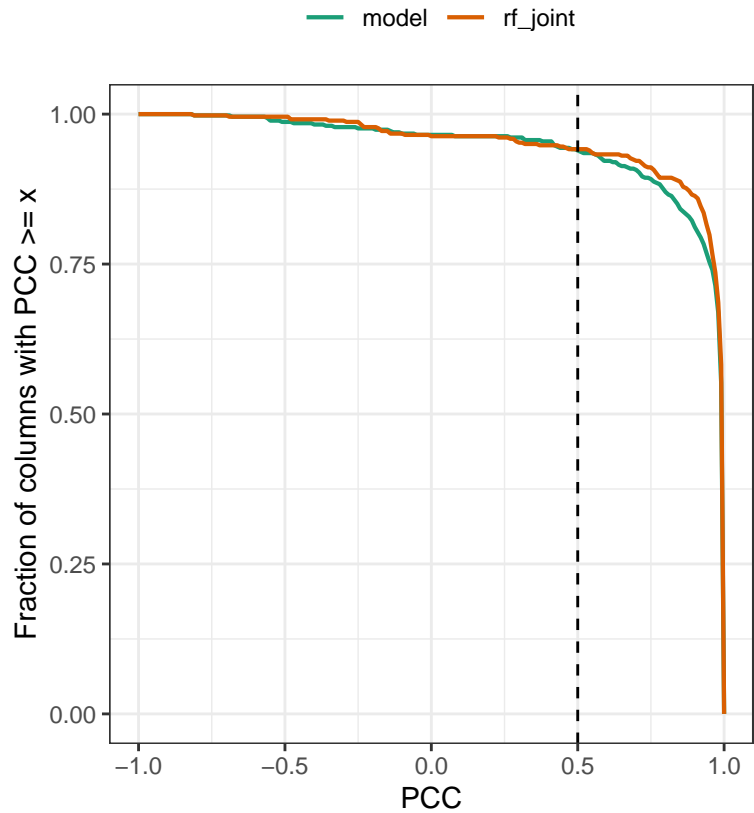

Supplement: SUPPLEMENTAL_Matl.zip [file pcc_fracGE_rf_joint_excludeTransfer.pdf › SUPPLEMENTAL_Matl/rCLAMPS/analysis_manuscript_plots/pcc_fracGE_rf_joint_excludeTransfer.pdf]

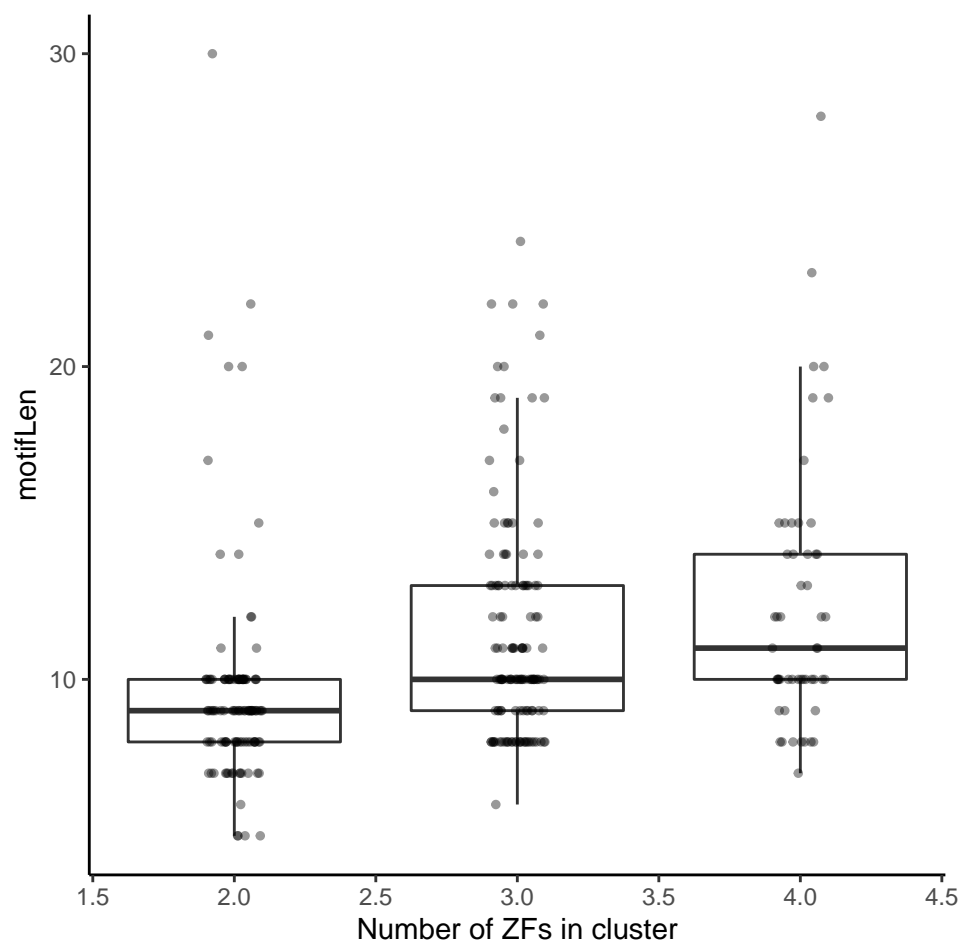

Supplement: SUPPLEMENTAL_Matl.zip [file 0_nZFs_V_motifLen.pdf › SUPPLEMENTAL_Matl/rCLAMPS/cis_bp/C2H2-ZF/0_nZFs_V_motifLen.pdf]

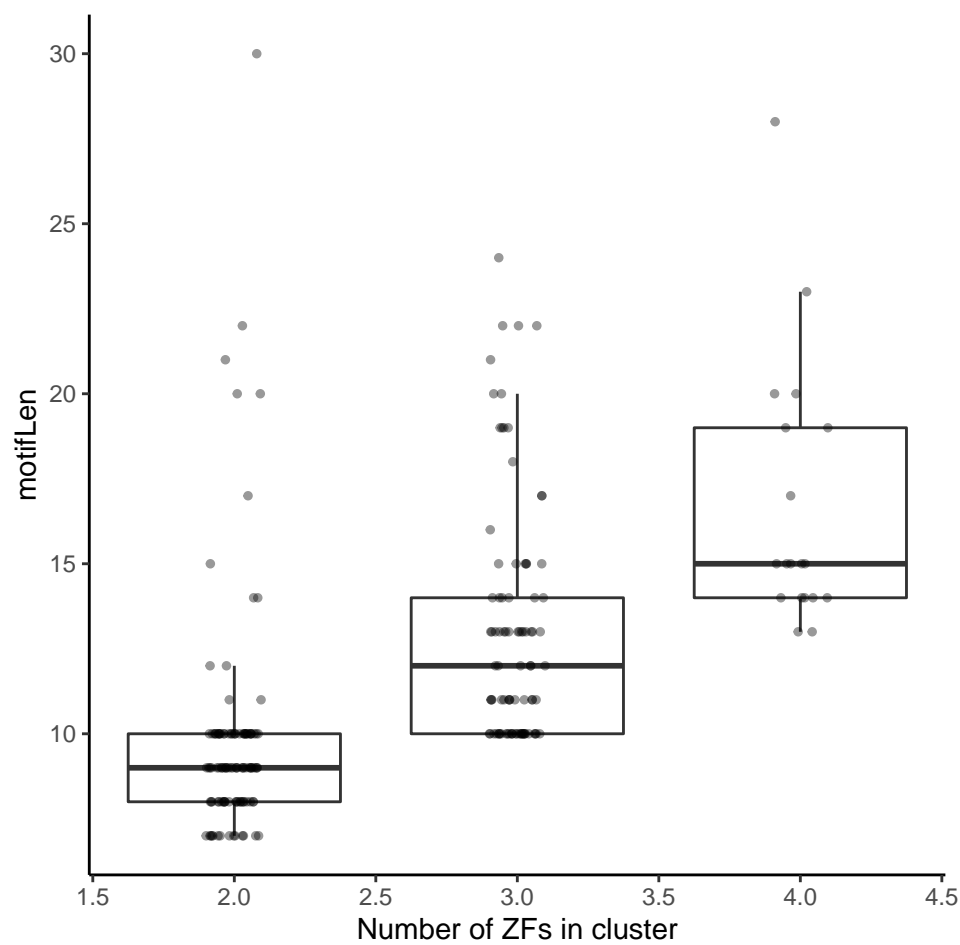

Supplement: SUPPLEMENTAL_Matl.zip [file 0_nZFs_V_motifLen_removeTooShort.pdf › SUPPLEMENTAL_Matl/rCLAMPS/cis_bp/C2H2-ZF/0_nZFs_V_motifLen_removeTooShort.pdf]

base

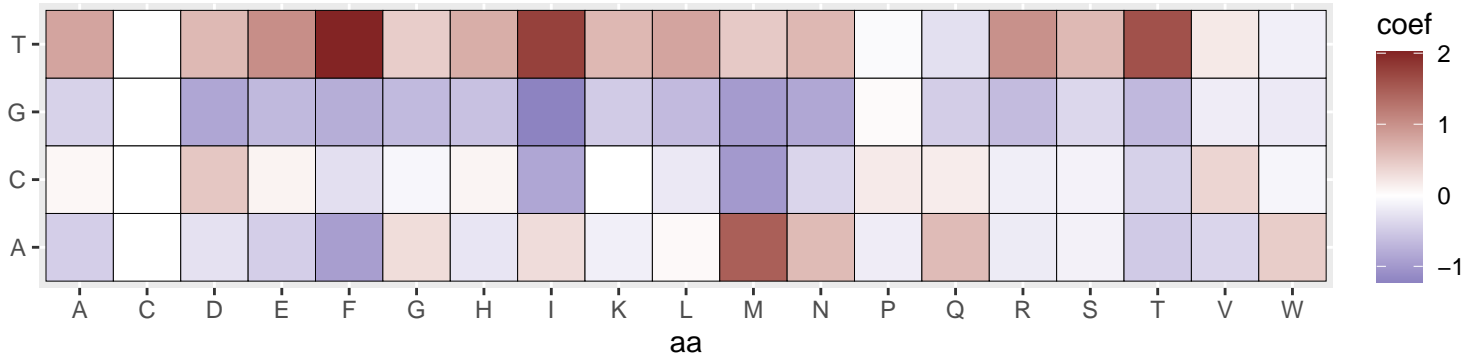

Supplement: SUPPLEMENTAL_Matl.zip [file coef_b1.a3.pdf › SUPPLEMENTAL_Matl/rCLAMPS/coefficientExplore/homeodomain/coef_plots/coef_b1.a3.pdf]
