# Supplementary figures and images for: Learning probabilistic protein–DNA recognition codes from DNA-binding specificities using structural mappings (part 4 of 25)
Source: HighWire-hosted journal article supplement (doi:10.1101/gr.276606.122), 2022-09-01

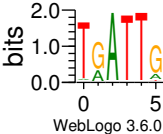

Supplement: SUPPLEMENTAL_Matl.zip [file GRMZM2G038252_ARQRNQNAR_207.pdf › SUPPLEMENTAL_Matl/rCLAMPS/STAMP/alignedLogos_NoyesGrps/logos_1/GRMZM2G038252_ARQRNQNAR_207.pdf]

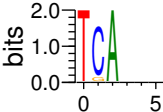

Supplement: SUPPLEMENTAL_Matl.zip [file GRMZM2G087741_KGKLNINKR.pdf › SUPPLEMENTAL_Matl/rCLAMPS/STAMP/alignedLogos_NoyesGrps/logos_1/GRMZM2G087741_KGKLNINKR.pdf]

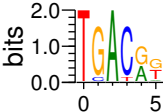

WebLogo 3.6.0

Supplement: SUPPLEMENTAL_Matl.zip [file GRMZM2G087741_KGKLNINKR_208.pdf › SUPPLEMENTAL_Matl/rCLAMPS/STAMP/alignedLogos_NoyesGrps/logos_1/GRMZM2G087741_KGKLNINKR_208.pdf]

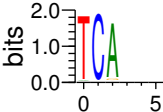

Supplement: SUPPLEMENTAL_Matl.zip [file GRMZM2G135447_KGKLNINKR.pdf › SUPPLEMENTAL_Matl/rCLAMPS/STAMP/alignedLogos_NoyesGrps/logos_1/GRMZM2G135447_KGKLNINKR.pdf]

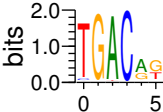

WebLogo 3.6.0

Supplement: SUPPLEMENTAL_Matl.zip [file GRMZM2G135447_KGKLNINKR_209.pdf › SUPPLEMENTAL_Matl/rCLAMPS/STAMP/alignedLogos_NoyesGrps/logos_1/GRMZM2G135447_KGKLNINKR_209.pdf]

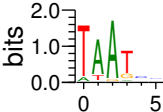

Supplement: SUPPLEMENTAL_Matl.zip [file GSC2_RRHRVKNAK.pdf › SUPPLEMENTAL_Matl/rCLAMPS/STAMP/alignedLogos_NoyesGrps/logos_1/GSC2_RRHRVKNAK.pdf]



Supplement: SUPPLEMENTAL_Matl.zip [file GSC2_RRHRVKNAK_211.pdf › SUPPLEMENTAL_Matl/rCLAMPS/STAMP/alignedLogos_NoyesGrps/logos_1/GSC2_RRHRVKNAK_211.pdf]

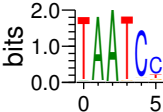

WebLogo 3.6.0

Supplement: SUPPLEMENTAL_Matl.zip [file GSC_RRHRVKNAK.pdf › SUPPLEMENTAL_Matl/rCLAMPS/STAMP/alignedLogos_NoyesGrps/logos_1/GSC_RRHRVKNAK.pdf]

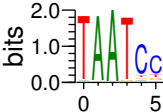

WebLogo 3.6.0

Supplement: SUPPLEMENTAL_Matl.zip [file GSC_RRHRVKNAK_210.pdf › SUPPLEMENTAL_Matl/rCLAMPS/STAMP/alignedLogos_NoyesGrps/logos_1/GSC_RRHRVKNAK_210.pdf]

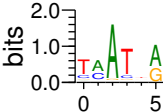

WebLogo 3.6.0

Supplement: SUPPLEMENTAL_Matl.zip [file GSX1_KRMRIQNVK.pdf › SUPPLEMENTAL_Matl/rCLAMPS/STAMP/alignedLogos_NoyesGrps/logos_1/GSX1_KRMRIQNVK.pdf]



WebLogo 3.6.0

Supplement: SUPPLEMENTAL_Matl.zip [file GSX1_KRMRIQNVK_212.pdf › SUPPLEMENTAL_Matl/rCLAMPS/STAMP/alignedLogos_NoyesGrps/logos_1/GSX1_KRMRIQNVK_212.pdf]

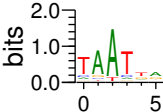

WebLogo 3.6.0

Supplement: SUPPLEMENTAL_Matl.zip [file GSX2_KRMRIQNVK.pdf › SUPPLEMENTAL_Matl/rCLAMPS/STAMP/alignedLogos_NoyesGrps/logos_1/GSX2_KRMRIQNVK.pdf]

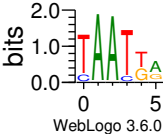

Supplement: SUPPLEMENTAL_Matl.zip [file GSX2_KRMRIQNVK_213.pdf › SUPPLEMENTAL_Matl/rCLAMPS/STAMP/alignedLogos_NoyesGrps/logos_1/GSX2_KRMRIQNVK_213.pdf]

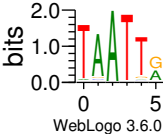

Supplement: SUPPLEMENTAL_Matl.zip [file Gbx1_RRRRIQNAK_214.pdf › SUPPLEMENTAL_Matl/rCLAMPS/STAMP/alignedLogos_NoyesGrps/logos_1/Gbx1_RRRRIQNAK_214.pdf]

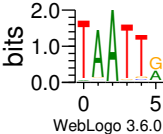

Supplement: SUPPLEMENTAL_Matl.zip [file Gbx2_RRRRIQNAK_215.pdf › SUPPLEMENTAL_Matl/rCLAMPS/STAMP/alignedLogos_NoyesGrps/logos_1/Gbx2_RRRRIQNAK_215.pdf]

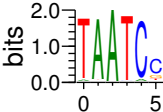

WebLogo 3.6.0

Supplement: SUPPLEMENTAL_Matl.zip [file Gsc_RRHRVKNAK_216.pdf › SUPPLEMENTAL_Matl/rCLAMPS/STAMP/alignedLogos_NoyesGrps/logos_1/Gsc_RRHRVKNAK_216.pdf]

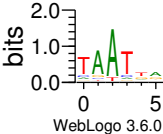

Supplement: SUPPLEMENTAL_Matl.zip [file Gsx2_KRMRIQNVK_217.pdf › SUPPLEMENTAL_Matl/rCLAMPS/STAMP/alignedLogos_NoyesGrps/logos_1/Gsx2_KRMRIQNVK_217.pdf]

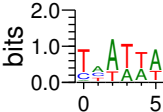

WebLogo 3.6.0

Supplement: SUPPLEMENTAL_Matl.zip [file H2.0_SWSRVQNMK.pdf › SUPPLEMENTAL_Matl/rCLAMPS/STAMP/alignedLogos_NoyesGrps/logos_1/H2.0_SWSRVQNMK.pdf]

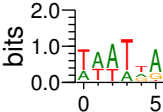

WebLogo 3.6.0

Supplement: SUPPLEMENTAL_Matl.zip [file H2.0_SWSRVQNMK_218.pdf › SUPPLEMENTAL_Matl/rCLAMPS/STAMP/alignedLogos_NoyesGrps/logos_1/H2.0_SWSRVQNMK_218.pdf]

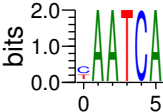

WebLogo 3.6.0

Supplement: SUPPLEMENTAL_Matl.zip [file HAT1_CRKKVQNAR.pdf › SUPPLEMENTAL_Matl/rCLAMPS/STAMP/alignedLogos_NoyesGrps/logos_1/HAT1_CRKKVQNAR.pdf]



WebLogo 3.6.0

Supplement: SUPPLEMENTAL_Matl.zip [file HAT1_CRKKVQNAR_219.pdf › SUPPLEMENTAL_Matl/rCLAMPS/STAMP/alignedLogos_NoyesGrps/logos_1/HAT1_CRKKVQNAR_219.pdf]

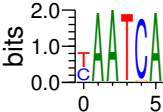

WebLogo 3.6.0

Supplement: SUPPLEMENTAL_Matl.zip [file HAT22_ARKKVQNAR_221.pdf › SUPPLEMENTAL_Matl/rCLAMPS/STAMP/alignedLogos_NoyesGrps/logos_1/HAT22_ARKKVQNAR_221.pdf]

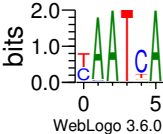

Supplement: SUPPLEMENTAL_Matl.zip [file HAT2_SRKKVQNAR_220.pdf › SUPPLEMENTAL_Matl/rCLAMPS/STAMP/alignedLogos_NoyesGrps/logos_1/HAT2_SRKKVQNAR_220.pdf]

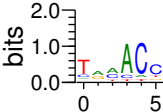

WebLogo 3.6.0

Supplement: SUPPLEMENTAL_Matl.zip [file HAT3.1_SSSANKHWS_223.pdf › SUPPLEMENTAL_Matl/rCLAMPS/STAMP/alignedLogos_NoyesGrps/logos_1/HAT3.1_SSSANKHWS_223.pdf]

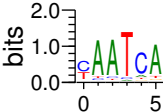

WebLogo 3.6.0

Supplement: SUPPLEMENTAL_Matl.zip [file HAT3_SRKKVQNAR.pdf › SUPPLEMENTAL_Matl/rCLAMPS/STAMP/alignedLogos_NoyesGrps/logos_1/HAT3_SRKKVQNAR.pdf]



WebLogo 3.6.0

Supplement: SUPPLEMENTAL_Matl.zip [file HAT3_SRKKVQNAR_222.pdf › SUPPLEMENTAL_Matl/rCLAMPS/STAMP/alignedLogos_NoyesGrps/logos_1/HAT3_SRKKVQNAR_222.pdf]

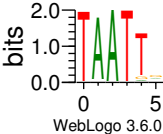

Supplement: SUPPLEMENTAL_Matl.zip [file HAT5_PEKKVQNAR_224.pdf › SUPPLEMENTAL_Matl/rCLAMPS/STAMP/alignedLogos_NoyesGrps/logos_1/HAT5_PEKKVQNAR_224.pdf]

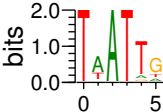

WebLogo 3.6.0

Supplement: SUPPLEMENTAL_Matl.zip [file HB-5_LFRKVQNAR_225.pdf › SUPPLEMENTAL_Matl/rCLAMPS/STAMP/alignedLogos_NoyesGrps/logos_1/HB-5_LFRKVQNAR_225.pdf]

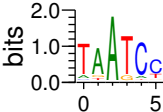

WebLogo 3.6.0

Supplement: SUPPLEMENTAL_Matl.zip [file HBX4_ECHGR_RRERVKNAK.pdf › SUPPLEMENTAL_Matl/rCLAMPS/STAMP/alignedLogos_NoyesGrps/logos_1/HBX4_ECHGR_RRERVKNAK.pdf]

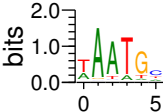

WebLogo 3.6.0

Supplement: SUPPLEMENTAL_Matl.zip [file HDG11_KKRYFQNTQ.pdf › SUPPLEMENTAL_Matl/rCLAMPS/STAMP/alignedLogos_NoyesGrps/logos_1/HDG11_KKRYFQNTQ.pdf]



WebLogo 3.6.0

Supplement: SUPPLEMENTAL_Matl.zip [file HDG11_KKRYFQNTQ_227.pdf › SUPPLEMENTAL_Matl/rCLAMPS/STAMP/alignedLogos_NoyesGrps/logos_1/HDG11_KKRYFQNTQ_227.pdf]

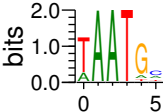

WebLogo 3.6.0

Supplement: SUPPLEMENTAL_Matl.zip [file HDG1_KKRYFQNTQ_226.pdf › SUPPLEMENTAL_Matl/rCLAMPS/STAMP/alignedLogos_NoyesGrps/logos_1/HDG1_KKRYFQNTQ_226.pdf]

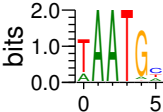

WebLogo 3.6.0

Supplement: SUPPLEMENTAL_Matl.zip [file HDG7_KTKYFQNTQ_228.pdf › SUPPLEMENTAL_Matl/rCLAMPS/STAMP/alignedLogos_NoyesGrps/logos_1/HDG7_KTKYFQNTQ_228.pdf]

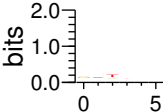

WebLogo 3.6.0

Supplement: SUPPLEMENTAL_Matl.zip [file HDX_LQDRTGNRK_229.pdf › SUPPLEMENTAL_Matl/rCLAMPS/STAMP/alignedLogos_NoyesGrps/logos_1/HDX_LQDRTGNRK_229.pdf]

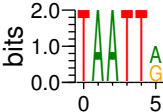

WebLogo 3.6.0

Supplement: SUPPLEMENTAL_Matl.zip [file HESX1_RRPRIQNAK.pdf › SUPPLEMENTAL_Matl/rCLAMPS/STAMP/alignedLogos_NoyesGrps/logos_1/HESX1_RRPRIQNAK.pdf]

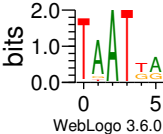

Supplement: SUPPLEMENTAL_Matl.zip [file HGTX_KHTRVQNTK.pdf › SUPPLEMENTAL_Matl/rCLAMPS/STAMP/alignedLogos_NoyesGrps/logos_1/HGTX_KHTRVQNTK.pdf]



Supplement: SUPPLEMENTAL_Matl.zip [file HGTX_KHTRVQNTK_230.pdf › SUPPLEMENTAL_Matl/rCLAMPS/STAMP/alignedLogos_NoyesGrps/logos_1/HGTX_KHTRVQNTK_230.pdf]

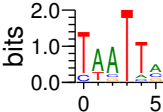

WebLogo 3.6.0

Supplement: SUPPLEMENTAL_Matl.zip [file HHEX_KGGQTQNAK.pdf › SUPPLEMENTAL_Matl/rCLAMPS/STAMP/alignedLogos_NoyesGrps/logos_1/HHEX_KGGQTQNAK.pdf]



WebLogo 3.6.0

Supplement: SUPPLEMENTAL_Matl.zip [file HHEX_KGGQTQNAK_231.pdf › SUPPLEMENTAL_Matl/rCLAMPS/STAMP/alignedLogos_NoyesGrps/logos_1/HHEX_KGGQTQNAK_231.pdf]

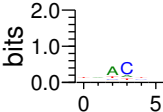

WebLogo 3.6.0

Supplement: SUPPLEMENTAL_Matl.zip [file HMBOX1_RGSRNANKE.pdf › SUPPLEMENTAL_Matl/rCLAMPS/STAMP/alignedLogos_NoyesGrps/logos_1/HMBOX1_RGSRNANKE.pdf]

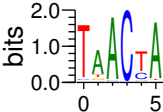

WebLogo 3.6.0

Supplement: SUPPLEMENTAL_Matl.zip [file HMBOX1_RGSRNANKE_232.pdf › SUPPLEMENTAL_Matl/rCLAMPS/STAMP/alignedLogos_NoyesGrps/logos_1/HMBOX1_RGSRNANKE_232.pdf]

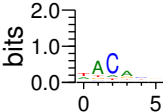

Supplement: SUPPLEMENTAL_Matl.zip [file HMLALPHA2_PYRGNSNRK_233.pdf › SUPPLEMENTAL_Matl/rCLAMPS/STAMP/alignedLogos_NoyesGrps/logos_1/HMLALPHA2_PYRGNSNRK_233.pdf]

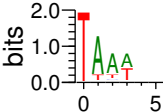

WebLogo 3.6.0

Supplement: SUPPLEMENTAL_Matl.zip [file HMRA2_PYRGNSNRK_234.pdf › SUPPLEMENTAL_Matl/rCLAMPS/STAMP/alignedLogos_NoyesGrps/logos_1/HMRA2_PYRGNSNRK_234.pdf]

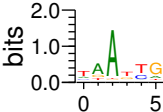

WebLogo 3.6.0

Supplement: SUPPLEMENTAL_Matl.zip [file HMX1_KKTRIQNNK.pdf › SUPPLEMENTAL_Matl/rCLAMPS/STAMP/alignedLogos_NoyesGrps/logos_1/HMX1_KKTRIQNNK.pdf]

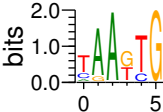

WebLogo 3.6.0

Supplement: SUPPLEMENTAL_Matl.zip [file HMX1_KKTRIQNNK_235.pdf › SUPPLEMENTAL_Matl/rCLAMPS/STAMP/alignedLogos_NoyesGrps/logos_1/HMX1_KKTRIQNNK_235.pdf]

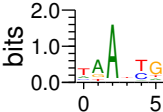

WebLogo 3.6.0

Supplement: SUPPLEMENTAL_Matl.zip [file HMX2_KKTRTQNNK.pdf › SUPPLEMENTAL_Matl/rCLAMPS/STAMP/alignedLogos_NoyesGrps/logos_1/HMX2_KKTRTQNNK.pdf]

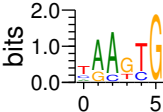

WebLogo 3.6.0

Supplement: SUPPLEMENTAL_Matl.zip [file HMX2_KKTRTQNNK_236.pdf › SUPPLEMENTAL_Matl/rCLAMPS/STAMP/alignedLogos_NoyesGrps/logos_1/HMX2_KKTRTQNNK_236.pdf]

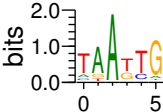

WebLogo 3.6.0

Supplement: SUPPLEMENTAL_Matl.zip [file HMX3_KKTRIQNNK.pdf › SUPPLEMENTAL_Matl/rCLAMPS/STAMP/alignedLogos_NoyesGrps/logos_1/HMX3_KKTRIQNNK.pdf]



WebLogo 3.6.0

Supplement: SUPPLEMENTAL_Matl.zip [file HMX3_KKTRIQNNK_237.pdf › SUPPLEMENTAL_Matl/rCLAMPS/STAMP/alignedLogos_NoyesGrps/logos_1/HMX3_KKTRIQNNK_237.pdf]

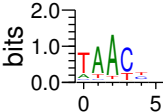

WebLogo 3.6.0

Supplement: SUPPLEMENTAL_Matl.zip [file HNF1A_RRNRNANKE.pdf › SUPPLEMENTAL_Matl/rCLAMPS/STAMP/alignedLogos_NoyesGrps/logos_1/HNF1A_RRNRNANKE.pdf]

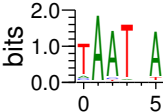

WebLogo 3.6.0

Supplement: SUPPLEMENTAL_Matl.zip [file HNF1A_RRNRNANKE_238.pdf › SUPPLEMENTAL_Matl/rCLAMPS/STAMP/alignedLogos_NoyesGrps/logos_1/HNF1A_RRNRNANKE_238.pdf]

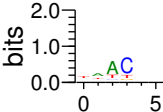

WebLogo 3.6.0

Supplement: SUPPLEMENTAL_Matl.zip [file HNF1B_RRNRNANKE.pdf › SUPPLEMENTAL_Matl/rCLAMPS/STAMP/alignedLogos_NoyesGrps/logos_1/HNF1B_RRNRNANKE.pdf]

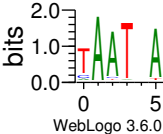

Supplement: SUPPLEMENTAL_Matl.zip [file HNF1B_RRNRNANKE_239.pdf › SUPPLEMENTAL_Matl/rCLAMPS/STAMP/alignedLogos_NoyesGrps/logos_1/HNF1B_RRNRNANKE_239.pdf]

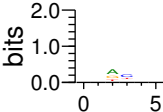

WebLogo 3.6.0

Supplement: SUPPLEMENTAL_Matl.zip [file HOS66_KRRANINKR_240.pdf › SUPPLEMENTAL_Matl/rCLAMPS/STAMP/alignedLogos_NoyesGrps/logos_1/HOS66_KRRANINKR_240.pdf]

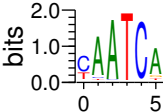

Supplement: SUPPLEMENTAL_Matl.zip [file HOX6_ADRKIQNAR_241.pdf › SUPPLEMENTAL_Matl/rCLAMPS/STAMP/alignedLogos_NoyesGrps/logos_1/HOX6_ADRKIQNAR_241.pdf]

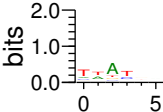

WebLogo 3.6.0

Supplement: SUPPLEMENTAL_Matl.zip [file HOXA10_RKKRIQNMK.pdf › SUPPLEMENTAL_Matl/rCLAMPS/STAMP/alignedLogos_NoyesGrps/logos_1/HOXA10_RKKRIQNMK.pdf]

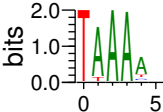

WebLogo 3.6.0

Supplement: SUPPLEMENTAL_Matl.zip [file HOXA10_RKKRIQNMK_243.pdf › SUPPLEMENTAL_Matl/rCLAMPS/STAMP/alignedLogos_NoyesGrps/logos_1/HOXA10_RKKRIQNMK_243.pdf]

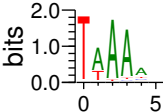

WebLogo 3.6.0

Supplement: SUPPLEMENTAL_Matl.zip [file HOXA11_RKKRIQNMK.pdf › SUPPLEMENTAL_Matl/rCLAMPS/STAMP/alignedLogos_NoyesGrps/logos_1/HOXA11_RKKRIQNMK.pdf]

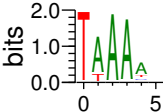

WebLogo 3.6.0

Supplement: SUPPLEMENTAL_Matl.zip [file HOXA11_RKKRIQNMK_244.pdf › SUPPLEMENTAL_Matl/rCLAMPS/STAMP/alignedLogos_NoyesGrps/logos_1/HOXA11_RKKRIQNMK_244.pdf]

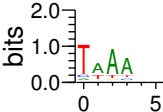

WebLogo 3.6.0

Supplement: SUPPLEMENTAL_Matl.zip [file HOXA13_RKKRIQNVK.pdf › SUPPLEMENTAL_Matl/rCLAMPS/STAMP/alignedLogos_NoyesGrps/logos_1/HOXA13_RKKRIQNVK.pdf]

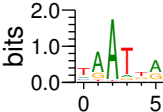

WebLogo 3.6.0

Supplement: SUPPLEMENTAL_Matl.zip [file HOXA1_NAVRIQNMK.pdf › SUPPLEMENTAL_Matl/rCLAMPS/STAMP/alignedLogos_NoyesGrps/logos_1/HOXA1_NAVRIQNMK.pdf]

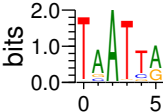

WebLogo 3.6.0

Supplement: SUPPLEMENTAL_Matl.zip [file HOXA1_NAVRIQNMK_242.pdf › SUPPLEMENTAL_Matl/rCLAMPS/STAMP/alignedLogos_NoyesGrps/logos_1/HOXA1_NAVRIQNMK_242.pdf]

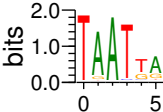

WebLogo 3.6.0

Supplement: SUPPLEMENTAL_Matl.zip [file HOXA2_RRLRVQNMK.pdf › SUPPLEMENTAL_Matl/rCLAMPS/STAMP/alignedLogos_NoyesGrps/logos_1/HOXA2_RRLRVQNMK.pdf]

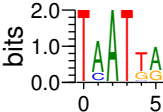

WebLogo 3.6.0

Supplement: SUPPLEMENTAL_Matl.zip [file HOXA2_RRLRVQNMK_245.pdf › SUPPLEMENTAL_Matl/rCLAMPS/STAMP/alignedLogos_NoyesGrps/logos_1/HOXA2_RRLRVQNMK_245.pdf]

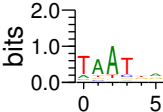

WebLogo 3.6.0

Supplement: SUPPLEMENTAL_Matl.zip [file HOXA4_KRSRIQNMK.pdf › SUPPLEMENTAL_Matl/rCLAMPS/STAMP/alignedLogos_NoyesGrps/logos_1/HOXA4_KRSRIQNMK.pdf]

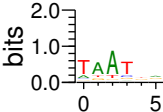

WebLogo 3.6.0

Supplement: SUPPLEMENTAL_Matl.zip [file HOXA5_KRARIQNMK.pdf › SUPPLEMENTAL_Matl/rCLAMPS/STAMP/alignedLogos_NoyesGrps/logos_1/HOXA5_KRARIQNMK.pdf]

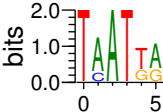

WebLogo 3.6.0

Supplement: SUPPLEMENTAL_Matl.zip [file HOXA5_KRARIQNMK_246.pdf › SUPPLEMENTAL_Matl/rCLAMPS/STAMP/alignedLogos_NoyesGrps/logos_1/HOXA5_KRARIQNMK_246.pdf]

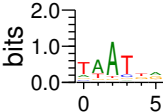

WebLogo 3.6.0

Supplement: SUPPLEMENTAL_Matl.zip [file HOXA6_RRGRIQNMK.pdf › SUPPLEMENTAL_Matl/rCLAMPS/STAMP/alignedLogos_NoyesGrps/logos_1/HOXA6_RRGRIQNMK.pdf]

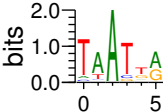

Supplement: SUPPLEMENTAL_Matl.zip [file HOXA6_RRGRIQNMK_247.pdf › SUPPLEMENTAL_Matl/rCLAMPS/STAMP/alignedLogos_NoyesGrps/logos_1/HOXA6_RRGRIQNMK_247.pdf]

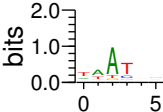

Supplement: SUPPLEMENTAL_Matl.zip [file HOXA7_KRGRIQNMK.pdf › SUPPLEMENTAL_Matl/rCLAMPS/STAMP/alignedLogos_NoyesGrps/logos_1/HOXA7_KRGRIQNMK.pdf]

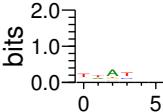

WebLogo 3.6.0

Supplement: SUPPLEMENTAL_Matl.zip [file HOXA9_RKKRIQNMK.pdf › SUPPLEMENTAL_Matl/rCLAMPS/STAMP/alignedLogos_NoyesGrps/logos_1/HOXA9_RKKRIQNMK.pdf]

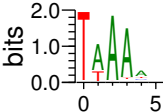

WebLogo 3.6.0

Supplement: SUPPLEMENTAL_Matl.zip [file HOXA9_RKKRIQNMK_248.pdf › SUPPLEMENTAL_Matl/rCLAMPS/STAMP/alignedLogos_NoyesGrps/logos_1/HOXA9_RKKRIQNMK_248.pdf]

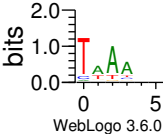

Supplement: SUPPLEMENTAL_Matl.zip [file HOXB13_RKKRIQNVK.pdf › SUPPLEMENTAL_Matl/rCLAMPS/STAMP/alignedLogos_NoyesGrps/logos_1/HOXB13_RKKRIQNVK.pdf]

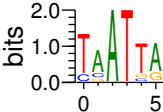

Supplement: SUPPLEMENTAL_Matl.zip [file HOXB1_SGLRIQNMK_249.pdf › SUPPLEMENTAL_Matl/rCLAMPS/STAMP/alignedLogos_NoyesGrps/logos_1/HOXB1_SGLRIQNMK_249.pdf]

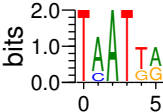

WebLogo 3.6.0

Supplement: SUPPLEMENTAL_Matl.zip [file HOXB2_RRLRVQNMK.pdf › SUPPLEMENTAL_Matl/rCLAMPS/STAMP/alignedLogos_NoyesGrps/logos_1/HOXB2_RRLRVQNMK.pdf]



WebLogo 3.6.0

Supplement: SUPPLEMENTAL_Matl.zip [file HOXB2_RRLRVQNMK_250.pdf › SUPPLEMENTAL_Matl/rCLAMPS/STAMP/alignedLogos_NoyesGrps/logos_1/HOXB2_RRLRVQNMK_250.pdf]

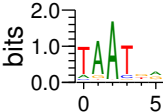

WebLogo 3.6.0

Supplement: SUPPLEMENTAL_Matl.zip [file HOXB3_KRARIQNMK.pdf › SUPPLEMENTAL_Matl/rCLAMPS/STAMP/alignedLogos_NoyesGrps/logos_1/HOXB3_KRARIQNMK.pdf]

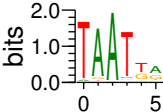

WebLogo 3.6.0

Supplement: SUPPLEMENTAL_Matl.zip [file HOXB3_KRARIQNMK_251.pdf › SUPPLEMENTAL_Matl/rCLAMPS/STAMP/alignedLogos_NoyesGrps/logos_1/HOXB3_KRARIQNMK_251.pdf]

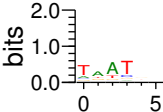

WebLogo 3.6.0

Supplement: SUPPLEMENTAL_Matl.zip [file HOXB5_KRARIQNMK.pdf › SUPPLEMENTAL_Matl/rCLAMPS/STAMP/alignedLogos_NoyesGrps/logos_1/HOXB5_KRARIQNMK.pdf]

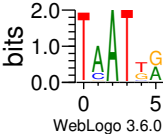

Supplement: SUPPLEMENTAL_Matl.zip [file HOXB5_KRARIQNMK_252.pdf › SUPPLEMENTAL_Matl/rCLAMPS/STAMP/alignedLogos_NoyesGrps/logos_1/HOXB5_KRARIQNMK_252.pdf]

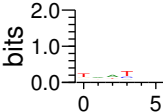

WebLogo 3.6.0

Supplement: SUPPLEMENTAL_Matl.zip [file HOXB6_RRGRIQNMK.pdf › SUPPLEMENTAL_Matl/rCLAMPS/STAMP/alignedLogos_NoyesGrps/logos_1/HOXB6_RRGRIQNMK.pdf]

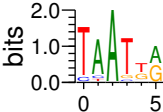

WebLogo 3.6.0

Supplement: SUPPLEMENTAL_Matl.zip [file HOXB6_RRGRIQNMK_253.pdf › SUPPLEMENTAL_Matl/rCLAMPS/STAMP/alignedLogos_NoyesGrps/logos_1/HOXB6_RRGRIQNMK_253.pdf]

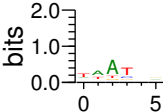

Supplement: SUPPLEMENTAL_Matl.zip [file HOXB7_KRGRIQNMK.pdf › SUPPLEMENTAL_Matl/rCLAMPS/STAMP/alignedLogos_NoyesGrps/logos_1/HOXB7_KRGRIQNMK.pdf]

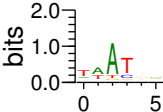

Supplement: SUPPLEMENTAL_Matl.zip [file HOXB8_RRGRIQNMK.pdf › SUPPLEMENTAL_Matl/rCLAMPS/STAMP/alignedLogos_NoyesGrps/logos_1/HOXB8_RRGRIQNMK.pdf]

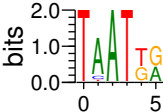

WebLogo 3.6.0

Supplement: SUPPLEMENTAL_Matl.zip [file HOXB8_RRGRIQNMK_254.pdf › SUPPLEMENTAL_Matl/rCLAMPS/STAMP/alignedLogos_NoyesGrps/logos_1/HOXB8_RRGRIQNMK_254.pdf]

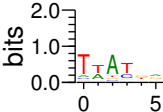

Supplement: SUPPLEMENTAL_Matl.zip [file HOXB9_RKKRIQNMK.pdf › SUPPLEMENTAL_Matl/rCLAMPS/STAMP/alignedLogos_NoyesGrps/logos_1/HOXB9_RKKRIQNMK.pdf]

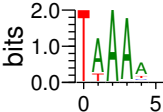

WebLogo 3.6.0

Supplement: SUPPLEMENTAL_Matl.zip [file HOXB9_RKKRIQNMK_255.pdf › SUPPLEMENTAL_Matl/rCLAMPS/STAMP/alignedLogos_NoyesGrps/logos_1/HOXB9_RKKRIQNMK_255.pdf]

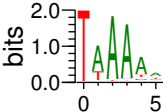

WebLogo 3.6.0

Supplement: SUPPLEMENTAL_Matl.zip [file HOXC10_RKKRIQNMK.pdf › SUPPLEMENTAL_Matl/rCLAMPS/STAMP/alignedLogos_NoyesGrps/logos_1/HOXC10_RKKRIQNMK.pdf]

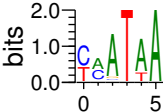

WebLogo 3.6.0

Supplement: SUPPLEMENTAL_Matl.zip [file HOXC10_RKKRIQNMK_256.pdf › SUPPLEMENTAL_Matl/rCLAMPS/STAMP/alignedLogos_NoyesGrps/logos_1/HOXC10_RKKRIQNMK_256.pdf]

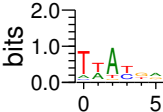

WebLogo 3.6.0

Supplement: SUPPLEMENTAL_Matl.zip [file HOXC11_RKKRIQNMK.pdf › SUPPLEMENTAL_Matl/rCLAMPS/STAMP/alignedLogos_NoyesGrps/logos_1/HOXC11_RKKRIQNMK.pdf]

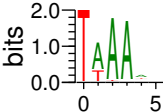

WebLogo 3.6.0

Supplement: SUPPLEMENTAL_Matl.zip [file HOXC11_RKKRIQNMK_257.pdf › SUPPLEMENTAL_Matl/rCLAMPS/STAMP/alignedLogos_NoyesGrps/logos_1/HOXC11_RKKRIQNMK_257.pdf]

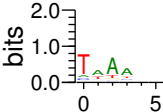

WebLogo 3.6.0

Supplement: SUPPLEMENTAL_Matl.zip [file HOXC12_RKKRIQNMK.pdf › SUPPLEMENTAL_Matl/rCLAMPS/STAMP/alignedLogos_NoyesGrps/logos_1/HOXC12_RKKRIQNMK.pdf]

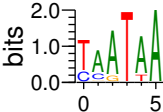

Supplement: SUPPLEMENTAL_Matl.zip [file HOXC12_RKKRIQNMK_258.pdf › SUPPLEMENTAL_Matl/rCLAMPS/STAMP/alignedLogos_NoyesGrps/logos_1/HOXC12_RKKRIQNMK_258.pdf]

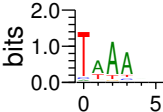

WebLogo 3.6.0

Supplement: SUPPLEMENTAL_Matl.zip [file HOXC13_RKKRIQNVK.pdf › SUPPLEMENTAL_Matl/rCLAMPS/STAMP/alignedLogos_NoyesGrps/logos_1/HOXC13_RKKRIQNVK.pdf]

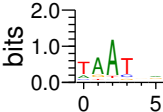

WebLogo 3.6.0

Supplement: SUPPLEMENTAL_Matl.zip [file HOXC4_KRSRIQNMK.pdf › SUPPLEMENTAL_Matl/rCLAMPS/STAMP/alignedLogos_NoyesGrps/logos_1/HOXC4_KRSRIQNMK.pdf]

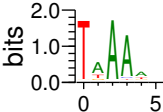

WebLogo 3.6.0

Supplement: SUPPLEMENTAL_Matl.zip [file HOXC9_RKKRIQNMK_259.pdf › SUPPLEMENTAL_Matl/rCLAMPS/STAMP/alignedLogos_NoyesGrps/logos_1/HOXC9_RKKRIQNMK_259.pdf]

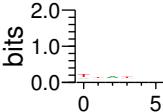

WebLogo 3.6.0

Supplement: SUPPLEMENTAL_Matl.zip [file HOXD10_RKKRIQNMK.pdf › SUPPLEMENTAL_Matl/rCLAMPS/STAMP/alignedLogos_NoyesGrps/logos_1/HOXD10_RKKRIQNMK.pdf]

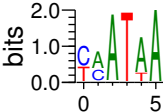

WebLogo 3.6.0

Supplement: SUPPLEMENTAL_Matl.zip [file HOXD10_RKKRIQNMK_261.pdf › SUPPLEMENTAL_Matl/rCLAMPS/STAMP/alignedLogos_NoyesGrps/logos_1/HOXD10_RKKRIQNMK_261.pdf]

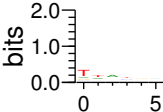

WebLogo 3.6.0

Supplement: SUPPLEMENTAL_Matl.zip [file HOXD11_RKKRIQNMK.pdf › SUPPLEMENTAL_Matl/rCLAMPS/STAMP/alignedLogos_NoyesGrps/logos_1/HOXD11_RKKRIQNMK.pdf]

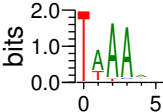

WebLogo 3.6.0

Supplement: SUPPLEMENTAL_Matl.zip [file HOXD11_RKKRIQNMK_262.pdf › SUPPLEMENTAL_Matl/rCLAMPS/STAMP/alignedLogos_NoyesGrps/logos_1/HOXD11_RKKRIQNMK_262.pdf]
