# Supplementary figures and images for: Learning probabilistic protein–DNA recognition codes from DNA-binding specificities using structural mappings (part 25 of 25)
Source: HighWire-hosted journal article supplement (doi:10.1101/gr.276606.122), 2022-09-01

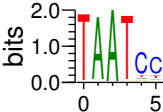

WebLogo 3.7.1

Supplement: SUPPLEMENTAL_Matl.zip [file gsc_cisbp.pdf › pairlogos/gsc_cisbp.pdf]

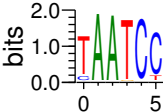

WebLogo 3.7.1

Supplement: SUPPLEMENTAL_Matl.zip [file gsc_predicted.pdf › pairlogos/gsc_predicted.pdf]

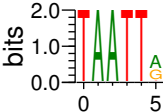

WebLogo 3.7.1

Supplement: SUPPLEMENTAL_Matl.zip [file hbn_cisbp.pdf › pairlogos/hbn_cisbp.pdf]

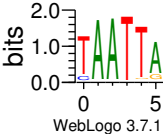

Supplement: SUPPLEMENTAL_Matl.zip [file hbn_predicted.pdf › pairlogos/hbn_predicted.pdf]

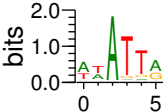

WebLogo 3.7.1

Supplement: SUPPLEMENTAL_Matl.zip [file hbx10_cisbp.pdf › pairlogos/hbx10_cisbp.pdf]

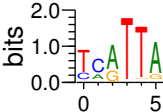

Supplement: SUPPLEMENTAL_Matl.zip [file hbx10_predicted.pdf › pairlogos/hbx10_predicted.pdf]

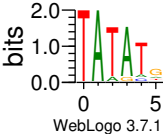

Supplement: SUPPLEMENTAL_Matl.zip [file hbx2_cisbp.pdf › pairlogos/hbx2_cisbp.pdf]

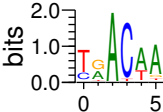

WebLogo 3.7.1

Supplement: SUPPLEMENTAL_Matl.zip [file hbx2_predicted.pdf › pairlogos/hbx2_predicted.pdf]

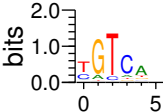

Supplement: SUPPLEMENTAL_Matl.zip [file hbx4_cisbp.pdf › pairlogos/hbx4_cisbp.pdf]

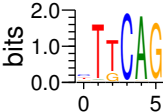

WebLogo 3.7.1

Supplement: SUPPLEMENTAL_Matl.zip [file hbx4_predicted.pdf › pairlogos/hbx4_predicted.pdf]

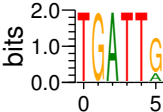

WebLogo 3.7.1

Supplement: SUPPLEMENTAL_Matl.zip [file hbx5-1_cisbp.pdf › pairlogos/hbx5-1_cisbp.pdf]

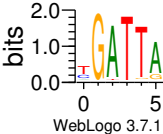

Supplement: SUPPLEMENTAL_Matl.zip [file hbx5-1_predicted.pdf › pairlogos/hbx5-1_predicted.pdf]

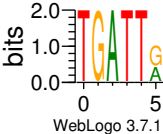

Supplement: SUPPLEMENTAL_Matl.zip [file hbx5-2_cisbp.pdf › pairlogos/hbx5-2_cisbp.pdf]



Supplement: SUPPLEMENTAL_Matl.zip [file hbx5-2_predicted.pdf › pairlogos/hbx5-2_predicted.pdf]

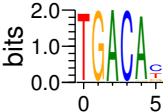

WebLogo 3.7.1

Supplement: SUPPLEMENTAL_Matl.zip [file hbx9_cisbp.pdf › pairlogos/hbx9_cisbp.pdf]

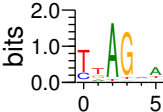

WebLogo 3.7.1

Supplement: SUPPLEMENTAL_Matl.zip [file hbx9_predicted.pdf › pairlogos/hbx9_predicted.pdf]

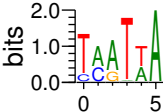

WebLogo 3.7.1

Supplement: SUPPLEMENTAL_Matl.zip [file hox12_cisbp.pdf › pairlogos/hox12_cisbp.pdf]

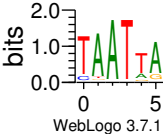

Supplement: SUPPLEMENTAL_Matl.zip [file hox12_predicted.pdf › pairlogos/hox12_predicted.pdf]

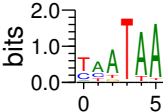

WebLogo 3.7.1

Supplement: SUPPLEMENTAL_Matl.zip [file hoxd13a_cisbp.pdf › pairlogos/hoxd13a_cisbp.pdf]

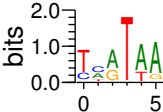

WebLogo 3.7.1

Supplement: SUPPLEMENTAL_Matl.zip [file hoxd13a_predicted.pdf › pairlogos/hoxd13a_predicted.pdf]

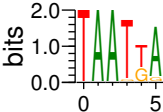

Supplement: SUPPLEMENTAL_Matl.zip [file ind_cisbp.pdf › pairlogos/ind_cisbp.pdf]

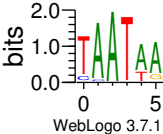

Supplement: SUPPLEMENTAL_Matl.zip [file ind_predicted.pdf › pairlogos/ind_predicted.pdf]

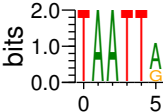

WebLogo 3.7.1

Supplement: SUPPLEMENTAL_Matl.zip [file inv_cisbp.pdf › pairlogos/inv_cisbp.pdf]

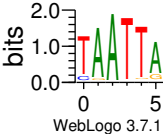

Supplement: SUPPLEMENTAL_Matl.zip [file inv_predicted.pdf › pairlogos/inv_predicted.pdf]

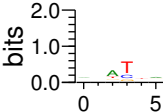

WebLogo 3.7.1

Supplement: SUPPLEMENTAL_Matl.zip [file kal-1_cisbp.pdf › pairlogos/kal-1_cisbp.pdf]

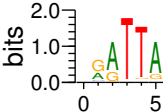

WebLogo 3.7.1

Supplement: SUPPLEMENTAL_Matl.zip [file kal-1_predicted.pdf › pairlogos/kal-1_predicted.pdf]

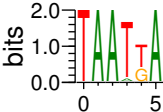

Supplement: SUPPLEMENTAL_Matl.zip [file lab_cisbp.pdf › pairlogos/lab_cisbp.pdf]

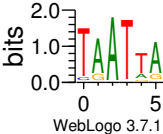

Supplement: SUPPLEMENTAL_Matl.zip [file lab_predicted.pdf › pairlogos/lab_predicted.pdf]

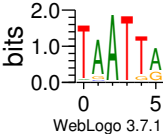

Supplement: SUPPLEMENTAL_Matl.zip [file lim-4_cisbp.pdf › pairlogos/lim-4_cisbp.pdf]

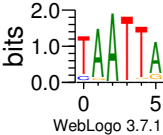

Supplement: SUPPLEMENTAL_Matl.zip [file lim-4_predicted.pdf › pairlogos/lim-4_predicted.pdf]

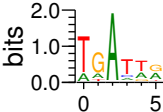

Supplement: SUPPLEMENTAL_Matl.zip [file lin-39_cisbp.pdf › pairlogos/lin-39_cisbp.pdf]

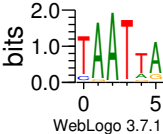

Supplement: SUPPLEMENTAL_Matl.zip [file lin-39_predicted.pdf › pairlogos/lin-39_predicted.pdf]

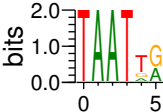

WebLogo 3.7.1

Supplement: SUPPLEMENTAL_Matl.zip [file lms_cisbp.pdf › pairlogos/lms_cisbp.pdf]

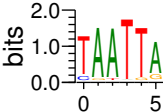

Supplement: SUPPLEMENTAL_Matl.zip [file lms_predicted.pdf › pairlogos/lms_predicted.pdf]

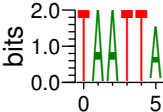

WebLogo 3.7.1

Supplement: SUPPLEMENTAL_Matl.zip [file mixl1.S_cisbp.pdf › pairlogos/mixl1.S_cisbp.pdf]

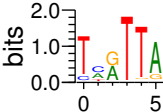

WebLogo 3.7.1

Supplement: SUPPLEMENTAL_Matl.zip [file mixl1.S_predicted.pdf › pairlogos/mixl1.S_predicted.pdf]

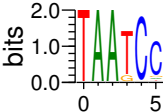

WebLogo 3.7.1

Supplement: SUPPLEMENTAL_Matl.zip [file oc_cisbp.pdf › pairlogos/oc_cisbp.pdf]

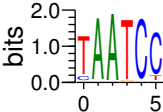

WebLogo 3.7.1

Supplement: SUPPLEMENTAL_Matl.zip [file oc_predicted.pdf › pairlogos/oc_predicted.pdf]

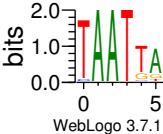

Supplement: SUPPLEMENTAL_Matl.zip [file otp_cisbp.pdf › pairlogos/otp_cisbp.pdf]

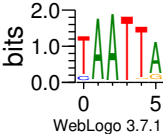

Supplement: SUPPLEMENTAL_Matl.zip [file otp_predicted.pdf › pairlogos/otp_predicted.pdf]

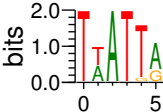

Supplement: SUPPLEMENTAL_Matl.zip [file pal-1_cisbp.pdf › pairlogos/pal-1_cisbp.pdf]

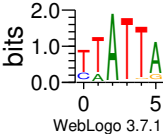

Supplement: SUPPLEMENTAL_Matl.zip [file pal-1_predicted.pdf › pairlogos/pal-1_predicted.pdf]

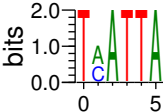

WebLogo 3.7.1

Supplement: SUPPLEMENTAL_Matl.zip [file pb_cisbp.pdf › pairlogos/pb_cisbp.pdf]

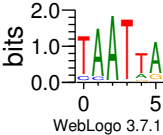

Supplement: SUPPLEMENTAL_Matl.zip [file pb_predicted.pdf › pairlogos/pb_predicted.pdf]

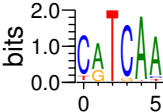

Supplement: SUPPLEMENTAL_Matl.zip [file pbx4_cisbp.pdf › pairlogos/pbx4_cisbp.pdf]

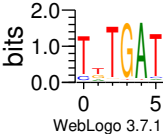

Supplement: SUPPLEMENTAL_Matl.zip [file pbx4_predicted.pdf › pairlogos/pbx4_predicted.pdf]

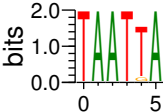

WebLogo 3.7.1

Supplement: SUPPLEMENTAL_Matl.zip [file pdm3_cisbp.pdf › pairlogos/pdm3_cisbp.pdf]

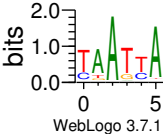

Supplement: SUPPLEMENTAL_Matl.zip [file pdm3_predicted.pdf › pairlogos/pdm3_predicted.pdf]

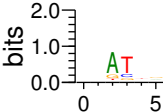

WebLogo 3.7.1

Supplement: SUPPLEMENTAL_Matl.zip [file pha-2_cisbp.pdf › pairlogos/pha-2_cisbp.pdf]

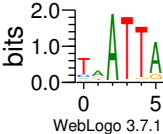

Supplement: SUPPLEMENTAL_Matl.zip [file pha-2_predicted.pdf › pairlogos/pha-2_predicted.pdf]

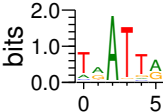

WebLogo 3.7.1

Supplement: SUPPLEMENTAL_Matl.zip [file prd-b_cisbp.pdf › pairlogos/prd-b_cisbp.pdf]

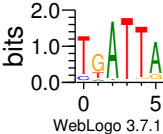

Supplement: SUPPLEMENTAL_Matl.zip [file prd-b_predicted.pdf › pairlogos/prd-b_predicted.pdf]

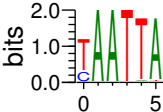

WebLogo 3.7.1

Supplement: SUPPLEMENTAL_Matl.zip [file repo_cisbp.pdf › pairlogos/repo_cisbp.pdf]

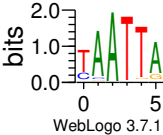

Supplement: SUPPLEMENTAL_Matl.zip [file repo_predicted.pdf › pairlogos/repo_predicted.pdf]

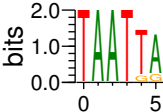

WebLogo 3.7.1

Supplement: SUPPLEMENTAL_Matl.zip [file ro_cisbp.pdf › pairlogos/ro_cisbp.pdf]

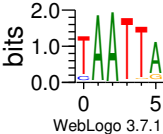

Supplement: SUPPLEMENTAL_Matl.zip [file ro_predicted.pdf › pairlogos/ro_predicted.pdf]

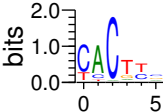

WebLogo 3.7.1

Supplement: SUPPLEMENTAL_Matl.zip [file scro_cisbp.pdf › pairlogos/scro_cisbp.pdf]

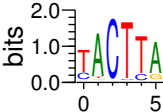

WebLogo 3.7.1

Supplement: SUPPLEMENTAL_Matl.zip [file scro_predicted.pdf › pairlogos/scro_predicted.pdf]

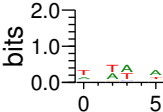

WebLogo 3.7.1

Supplement: SUPPLEMENTAL_Matl.zip [file si:dkey-43p13.5_cisbp.pdf › pairlogos/si:dkey-43p13.5_cisbp.pdf]

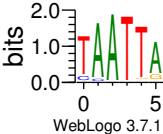

Supplement: SUPPLEMENTAL_Matl.zip [file si:dkey-43p13.5_predicted.pdf › pairlogos/si:dkey-43p13.5_predicted.pdf]

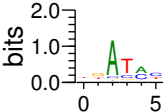

Supplement: SUPPLEMENTAL_Matl.zip [file six3_cisbp.pdf › pairlogos/six3_cisbp.pdf]

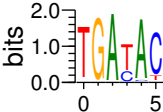

WebLogo 3.7.1

Supplement: SUPPLEMENTAL_Matl.zip [file six3_predicted.pdf › pairlogos/six3_predicted.pdf]

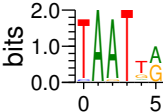

WebLogo 3.7.1

Supplement: SUPPLEMENTAL_Matl.zip [file slou_cisbp.pdf › pairlogos/slou_cisbp.pdf]

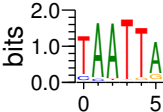

WebLogo 3.7.1

Supplement: SUPPLEMENTAL_Matl.zip [file slou_predicted.pdf › pairlogos/slou_predicted.pdf]

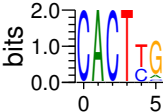

WebLogo 3.7.1

Supplement: SUPPLEMENTAL_Matl.zip [file tin_cisbp.pdf › pairlogos/tin_cisbp.pdf]

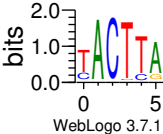

Supplement: SUPPLEMENTAL_Matl.zip [file tin_predicted.pdf › pairlogos/tin_predicted.pdf]

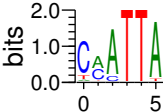

WebLogo 3.7.1

Supplement: SUPPLEMENTAL_Matl.zip [file tup_cisbp.pdf › pairlogos/tup_cisbp.pdf]

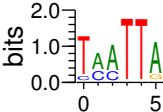

WebLogo 3.7.1

Supplement: SUPPLEMENTAL_Matl.zip [file tup_predicted.pdf › pairlogos/tup_predicted.pdf]

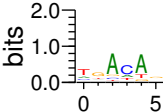

WebLogo 3.7.1

Supplement: SUPPLEMENTAL_Matl.zip [file unc-62_cisbp.pdf › pairlogos/unc-62_cisbp.pdf]

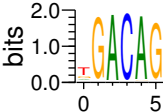

WebLogo 3.7.1

Supplement: SUPPLEMENTAL_Matl.zip [file unc-62_predicted.pdf › pairlogos/unc-62_predicted.pdf]

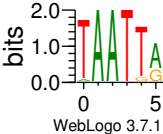

Supplement: SUPPLEMENTAL_Matl.zip [file unpg_cisbp.pdf › pairlogos/unpg_cisbp.pdf]

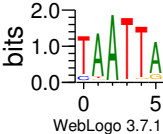

Supplement: SUPPLEMENTAL_Matl.zip [file unpg_predicted.pdf › pairlogos/unpg_predicted.pdf]

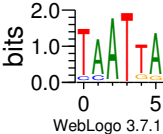

Supplement: SUPPLEMENTAL_Matl.zip [file vab-7_cisbp.pdf › pairlogos/vab-7_cisbp.pdf]

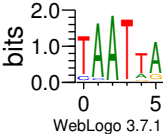

Supplement: SUPPLEMENTAL_Matl.zip [file vab-7_predicted.pdf › pairlogos/vab-7_predicted.pdf]

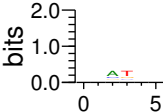

WebLogo 3.7.1

Supplement: SUPPLEMENTAL_Matl.zip [file ventx1.1.L_cisbp.pdf › pairlogos/ventx1.1.L_cisbp.pdf]

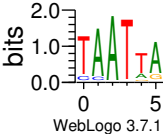

Supplement: SUPPLEMENTAL_Matl.zip [file ventx1.1.L_predicted.pdf › pairlogos/ventx1.1.L_predicted.pdf]

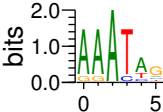

WebLogo 3.7.1

Supplement: SUPPLEMENTAL_Matl.zip [file ventx1.2.S_cisbp.pdf › pairlogos/ventx1.2.S_cisbp.pdf]



Supplement: SUPPLEMENTAL_Matl.zip [file ventx1.2.S_predicted.pdf › pairlogos/ventx1.2.S_predicted.pdf]

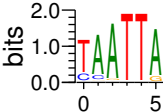

WebLogo 3.7.1

Supplement: SUPPLEMENTAL_Matl.zip [file ventx3.2_cisbp.pdf › pairlogos/ventx3.2_cisbp.pdf]

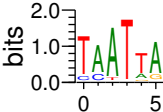

WebLogo 3.7.1

Supplement: SUPPLEMENTAL_Matl.zip [file ventx3.2_predicted.pdf › pairlogos/ventx3.2_predicted.pdf]

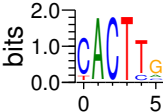

WebLogo 3.7.1

Supplement: SUPPLEMENTAL_Matl.zip [file vnd_cisbp.pdf › pairlogos/vnd_cisbp.pdf]



WebLogo 3.7.1

Supplement: SUPPLEMENTAL_Matl.zip [file vnd_predicted.pdf › pairlogos/vnd_predicted.pdf]

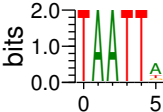

WebLogo 3.7.1

Supplement: SUPPLEMENTAL_Matl.zip [file yox1_cisbp.pdf › pairlogos/yox1_cisbp.pdf]

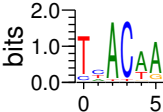

WebLogo 3.7.1

Supplement: SUPPLEMENTAL_Matl.zip [file yox1_predicted.pdf › pairlogos/yox1_predicted.pdf]

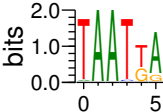

WebLogo 3.7.1

Supplement: SUPPLEMENTAL_Matl.zip [file zen2_cisbp.pdf › pairlogos/zen2_cisbp.pdf]

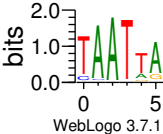

Supplement: SUPPLEMENTAL_Matl.zip [file zen2_predicted.pdf › pairlogos/zen2_predicted.pdf]

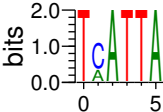

WebLogo 3.7.1

Supplement: SUPPLEMENTAL_Matl.zip [file zen_cisbp.pdf › pairlogos/zen_cisbp.pdf]



Supplement: SUPPLEMENTAL_Matl.zip [file zen_predicted.pdf › pairlogos/zen_predicted.pdf]

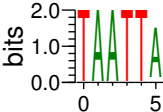

WebLogo 3.7.1

Supplement: SUPPLEMENTAL_Matl.zip [file zfh-2_cisbp.pdf › pairlogos/zfh-2_cisbp.pdf]

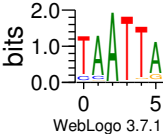

Supplement: SUPPLEMENTAL_Matl.zip [file zfh-2_predicted.pdf › pairlogos/zfh-2_predicted.pdf]

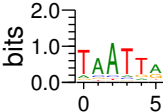

WebLogo 3.7.1

Supplement: SUPPLEMENTAL_Matl.zip [file zfhx4_cisbp.pdf › pairlogos/zfhx4_cisbp.pdf]



Supplement: SUPPLEMENTAL_Matl.zip [file zfhx4_predicted.pdf › pairlogos/zfhx4_predicted.pdf]
