# Supplementary figures and images for: Learning probabilistic protein–DNA recognition codes from DNA-binding specificities using structural mappings (part 21 of 25)
Source: HighWire-hosted journal article supplement (doi:10.1101/gr.276606.122), 2022-09-01

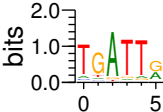

WebLogo 3.7.1

Supplement: SUPPLEMENTAL_Matl.zip [file HAT3_cisbp.pdf › pairlogos/HAT3_cisbp.pdf]

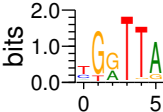

WebLogo 3.7.1

Supplement: SUPPLEMENTAL_Matl.zip [file HAT3_predicted.pdf › pairlogos/HAT3_predicted.pdf]

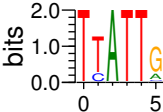

Supplement: SUPPLEMENTAL_Matl.zip [file HAT5_cisbp.pdf › pairlogos/HAT5_cisbp.pdf]

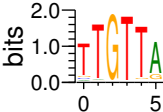

WebLogo 3.7.1

Supplement: SUPPLEMENTAL_Matl.zip [file HAT5_predicted.pdf › pairlogos/HAT5_predicted.pdf]

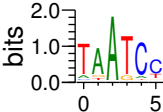

WebLogo 3.7.1

Supplement: SUPPLEMENTAL_Matl.zip [file HBX4_ECHGR_cisbp.pdf › pairlogos/HBX4_ECHGR_cisbp.pdf]

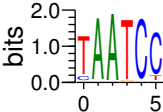

WebLogo 3.7.1

Supplement: SUPPLEMENTAL_Matl.zip [file HBX4_ECHGR_predicted.pdf › pairlogos/HBX4_ECHGR_predicted.pdf]

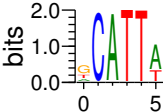

WebLogo 3.7.1

Supplement: SUPPLEMENTAL_Matl.zip [file HDG11_cisbp.pdf › pairlogos/HDG11_cisbp.pdf]

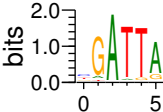

WebLogo 3.7.1

Supplement: SUPPLEMENTAL_Matl.zip [file HDG11_predicted.pdf › pairlogos/HDG11_predicted.pdf]

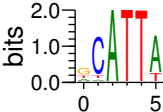

WebLogo 3.7.1

Supplement: SUPPLEMENTAL_Matl.zip [file HDG1_cisbp.pdf › pairlogos/HDG1_cisbp.pdf]



WebLogo 3.7.1

Supplement: SUPPLEMENTAL_Matl.zip [file HDG1_predicted.pdf › pairlogos/HDG1_predicted.pdf]

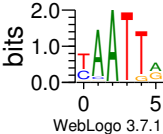

Supplement: SUPPLEMENTAL_Matl.zip [file HESX1_cisbp.pdf › pairlogos/HESX1_cisbp.pdf]

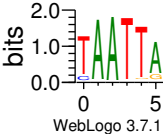

Supplement: SUPPLEMENTAL_Matl.zip [file HESX1_predicted.pdf › pairlogos/HESX1_predicted.pdf]

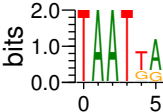

WebLogo 3.7.1

Supplement: SUPPLEMENTAL_Matl.zip [file HGTX_cisbp.pdf › pairlogos/HGTX_cisbp.pdf]

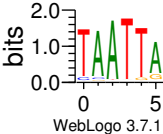

Supplement: SUPPLEMENTAL_Matl.zip [file HGTX_predicted.pdf › pairlogos/HGTX_predicted.pdf]

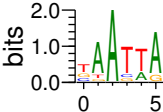

WebLogo 3.7.1

Supplement: SUPPLEMENTAL_Matl.zip [file HHEX_cisbp.pdf › pairlogos/HHEX_cisbp.pdf]

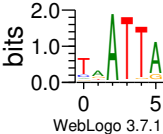

Supplement: SUPPLEMENTAL_Matl.zip [file HHEX_predicted.pdf › pairlogos/HHEX_predicted.pdf]

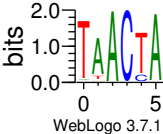

Supplement: SUPPLEMENTAL_Matl.zip [file HMBOX1_cisbp.pdf › pairlogos/HMBOX1_cisbp.pdf]

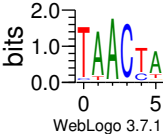

Supplement: SUPPLEMENTAL_Matl.zip [file HMBOX1_predicted.pdf › pairlogos/HMBOX1_predicted.pdf]

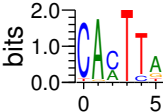

WebLogo 3.7.1

Supplement: SUPPLEMENTAL_Matl.zip [file HMX1_cisbp.pdf › pairlogos/HMX1_cisbp.pdf]

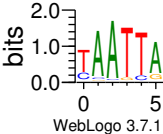

Supplement: SUPPLEMENTAL_Matl.zip [file HMX1_predicted.pdf › pairlogos/HMX1_predicted.pdf]

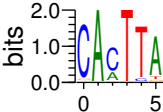

WebLogo 3.7.1

Supplement: SUPPLEMENTAL_Matl.zip [file HMX2_cisbp.pdf › pairlogos/HMX2_cisbp.pdf]

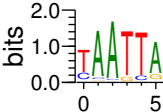

Supplement: SUPPLEMENTAL_Matl.zip [file HMX2_predicted.pdf › pairlogos/HMX2_predicted.pdf]

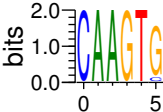

WebLogo 3.7.1

Supplement: SUPPLEMENTAL_Matl.zip [file HMX3_cisbp.pdf › pairlogos/HMX3_cisbp.pdf]



Supplement: SUPPLEMENTAL_Matl.zip [file HMX3_predicted.pdf › pairlogos/HMX3_predicted.pdf]

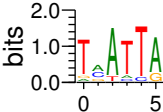

WebLogo 3.7.1

Supplement: SUPPLEMENTAL_Matl.zip [file HNF1A_cisbp.pdf › pairlogos/HNF1A_cisbp.pdf]

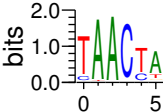

WebLogo 3.7.1

Supplement: SUPPLEMENTAL_Matl.zip [file HNF1A_predicted.pdf › pairlogos/HNF1A_predicted.pdf]

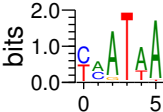

WebLogo 3.7.1

Supplement: SUPPLEMENTAL_Matl.zip [file HOXA10_cisbp.pdf › pairlogos/HOXA10_cisbp.pdf]

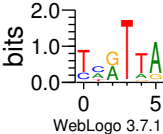

Supplement: SUPPLEMENTAL_Matl.zip [file HOXA10_predicted.pdf › pairlogos/HOXA10_predicted.pdf]

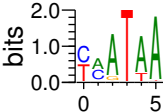

WebLogo 3.7.1

Supplement: SUPPLEMENTAL_Matl.zip [file HOXA11_cisbp.pdf › pairlogos/HOXA11_cisbp.pdf]



Supplement: SUPPLEMENTAL_Matl.zip [file HOXA11_predicted.pdf › pairlogos/HOXA11_predicted.pdf]

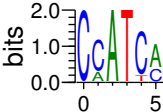

Supplement: SUPPLEMENTAL_Matl.zip [file HOXA1_cisbp.pdf › pairlogos/HOXA1_cisbp.pdf]

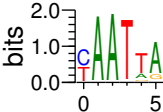

WebLogo 3.7.1

Supplement: SUPPLEMENTAL_Matl.zip [file HOXA1_predicted.pdf › pairlogos/HOXA1_predicted.pdf]

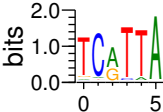

WebLogo 3.7.1

Supplement: SUPPLEMENTAL_Matl.zip [file HOXA2_cisbp.pdf › pairlogos/HOXA2_cisbp.pdf]

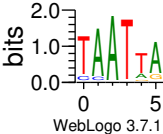

Supplement: SUPPLEMENTAL_Matl.zip [file HOXA2_predicted.pdf › pairlogos/HOXA2_predicted.pdf]

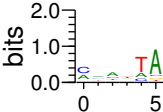

Supplement: SUPPLEMENTAL_Matl.zip [file HOXA3_cisbp.pdf › pairlogos/HOXA3_cisbp.pdf]

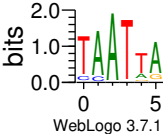

Supplement: SUPPLEMENTAL_Matl.zip [file HOXA3_predicted.pdf › pairlogos/HOXA3_predicted.pdf]

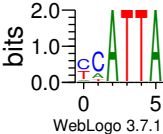

Supplement: SUPPLEMENTAL_Matl.zip [file HOXA5_cisbp.pdf › pairlogos/HOXA5_cisbp.pdf]



Supplement: SUPPLEMENTAL_Matl.zip [file HOXA5_predicted.pdf › pairlogos/HOXA5_predicted.pdf]

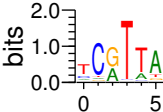

Supplement: SUPPLEMENTAL_Matl.zip [file HOXA6_cisbp.pdf › pairlogos/HOXA6_cisbp.pdf]

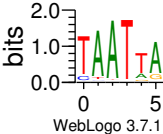

Supplement: SUPPLEMENTAL_Matl.zip [file HOXA6_predicted.pdf › pairlogos/HOXA6_predicted.pdf]

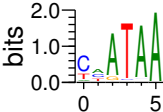

WebLogo 3.7.1

Supplement: SUPPLEMENTAL_Matl.zip [file HOXB13_cisbp.pdf › pairlogos/HOXB13_cisbp.pdf]

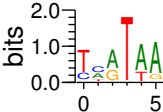

WebLogo 3.7.1

Supplement: SUPPLEMENTAL_Matl.zip [file HOXB13_predicted.pdf › pairlogos/HOXB13_predicted.pdf]

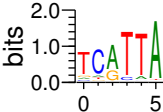

WebLogo 3.7.1

Supplement: SUPPLEMENTAL_Matl.zip [file HOXB2_cisbp.pdf › pairlogos/HOXB2_cisbp.pdf]



Supplement: SUPPLEMENTAL_Matl.zip [file HOXB2_predicted.pdf › pairlogos/HOXB2_predicted.pdf]

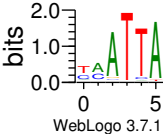

Supplement: SUPPLEMENTAL_Matl.zip [file HOXB3_cisbp.pdf › pairlogos/HOXB3_cisbp.pdf]



Supplement: SUPPLEMENTAL_Matl.zip [file HOXB3_predicted.pdf › pairlogos/HOXB3_predicted.pdf]

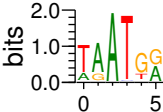

WebLogo 3.7.1

Supplement: SUPPLEMENTAL_Matl.zip [file HOXB4_cisbp.pdf › pairlogos/HOXB4_cisbp.pdf]

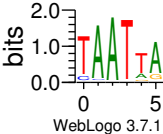

Supplement: SUPPLEMENTAL_Matl.zip [file HOXB4_predicted.pdf › pairlogos/HOXB4_predicted.pdf]

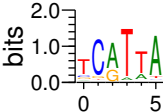

WebLogo 3.7.1

Supplement: SUPPLEMENTAL_Matl.zip [file HOXB5_cisbp.pdf › pairlogos/HOXB5_cisbp.pdf]



Supplement: SUPPLEMENTAL_Matl.zip [file HOXB5_predicted.pdf › pairlogos/HOXB5_predicted.pdf]

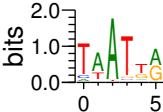

Supplement: SUPPLEMENTAL_Matl.zip [file HOXB6_cisbp.pdf › pairlogos/HOXB6_cisbp.pdf]



Supplement: SUPPLEMENTAL_Matl.zip [file HOXB6_predicted.pdf › pairlogos/HOXB6_predicted.pdf]

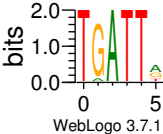

Supplement: SUPPLEMENTAL_Matl.zip [file HOXB7_cisbp.pdf › pairlogos/HOXB7_cisbp.pdf]

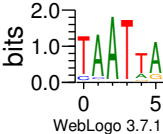

Supplement: SUPPLEMENTAL_Matl.zip [file HOXB7_predicted.pdf › pairlogos/HOXB7_predicted.pdf]

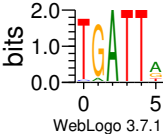

Supplement: SUPPLEMENTAL_Matl.zip [file HOXB8_cisbp.pdf › pairlogos/HOXB8_cisbp.pdf]



Supplement: SUPPLEMENTAL_Matl.zip [file HOXB8_predicted.pdf › pairlogos/HOXB8_predicted.pdf]

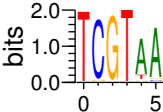

WebLogo 3.7.1

Supplement: SUPPLEMENTAL_Matl.zip [file HOXB9_cisbp.pdf › pairlogos/HOXB9_cisbp.pdf]

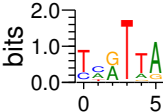

WebLogo 3.7.1

Supplement: SUPPLEMENTAL_Matl.zip [file HOXB9_predicted.pdf › pairlogos/HOXB9_predicted.pdf]

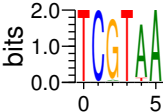

WebLogo 3.7.1

Supplement: SUPPLEMENTAL_Matl.zip [file HOXC10_cisbp.pdf › pairlogos/HOXC10_cisbp.pdf]



WebLogo 3.7.1

Supplement: SUPPLEMENTAL_Matl.zip [file HOXC10_predicted.pdf › pairlogos/HOXC10_predicted.pdf]

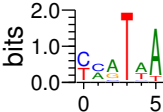

WebLogo 3.7.1

Supplement: SUPPLEMENTAL_Matl.zip [file HOXC11_cisbp.pdf › pairlogos/HOXC11_cisbp.pdf]



WebLogo 3.7.1

Supplement: SUPPLEMENTAL_Matl.zip [file HOXC11_predicted.pdf › pairlogos/HOXC11_predicted.pdf]

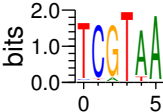

WebLogo 3.7.1

Supplement: SUPPLEMENTAL_Matl.zip [file HOXC12_cisbp.pdf › pairlogos/HOXC12_cisbp.pdf]



WebLogo 3.7.1

Supplement: SUPPLEMENTAL_Matl.zip [file HOXC12_predicted.pdf › pairlogos/HOXC12_predicted.pdf]

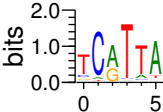

WebLogo 3.7.1

Supplement: SUPPLEMENTAL_Matl.zip [file HOXC4_cisbp.pdf › pairlogos/HOXC4_cisbp.pdf]



Supplement: SUPPLEMENTAL_Matl.zip [file HOXC4_predicted.pdf › pairlogos/HOXC4_predicted.pdf]

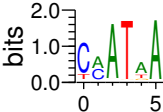

WebLogo 3.7.1

Supplement: SUPPLEMENTAL_Matl.zip [file HOXC9_cisbp.pdf › pairlogos/HOXC9_cisbp.pdf]



WebLogo 3.7.1

Supplement: SUPPLEMENTAL_Matl.zip [file HOXC9_predicted.pdf › pairlogos/HOXC9_predicted.pdf]

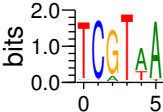

WebLogo 3.7.1

Supplement: SUPPLEMENTAL_Matl.zip [file HOXD11_cisbp.pdf › pairlogos/HOXD11_cisbp.pdf]



Supplement: SUPPLEMENTAL_Matl.zip [file HOXD11_predicted.pdf › pairlogos/HOXD11_predicted.pdf]

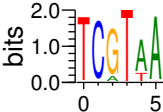

WebLogo 3.7.1

Supplement: SUPPLEMENTAL_Matl.zip [file HOXD12_cisbp.pdf › pairlogos/HOXD12_cisbp.pdf]



WebLogo 3.7.1

Supplement: SUPPLEMENTAL_Matl.zip [file HOXD12_predicted.pdf › pairlogos/HOXD12_predicted.pdf]

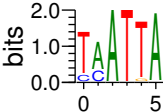

WebLogo 3.7.1

Supplement: SUPPLEMENTAL_Matl.zip [file HOXD3_cisbp.pdf › pairlogos/HOXD3_cisbp.pdf]

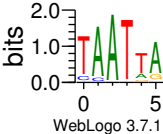

Supplement: SUPPLEMENTAL_Matl.zip [file HOXD3_predicted.pdf › pairlogos/HOXD3_predicted.pdf]

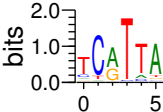

Supplement: SUPPLEMENTAL_Matl.zip [file HOXD4_cisbp.pdf › pairlogos/HOXD4_cisbp.pdf]



Supplement: SUPPLEMENTAL_Matl.zip [file HOXD4_predicted.pdf › pairlogos/HOXD4_predicted.pdf]

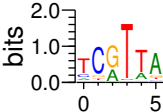

Supplement: SUPPLEMENTAL_Matl.zip [file HOXD8_cisbp.pdf › pairlogos/HOXD8_cisbp.pdf]



Supplement: SUPPLEMENTAL_Matl.zip [file HOXD8_predicted.pdf › pairlogos/HOXD8_predicted.pdf]

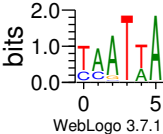

Supplement: SUPPLEMENTAL_Matl.zip [file HXD12_HETFR_cisbp.pdf › pairlogos/HXD12_HETFR_cisbp.pdf]

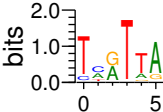

WebLogo 3.7.1

Supplement: SUPPLEMENTAL_Matl.zip [file HXD12_HETFR_predicted.pdf › pairlogos/HXD12_HETFR_predicted.pdf]

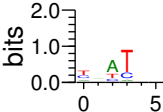

WebLogo 3.7.1

Supplement: SUPPLEMENTAL_Matl.zip [file Hlx_cisbp.pdf › pairlogos/Hlx_cisbp.pdf]

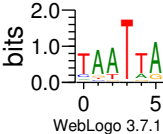

Supplement: SUPPLEMENTAL_Matl.zip [file Hlx_predicted.pdf › pairlogos/Hlx_predicted.pdf]

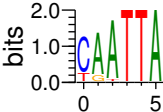

WebLogo 3.7.1

Supplement: SUPPLEMENTAL_Matl.zip [file Hmx_cisbp.pdf › pairlogos/Hmx_cisbp.pdf]



Supplement: SUPPLEMENTAL_Matl.zip [file Hmx_predicted.pdf › pairlogos/Hmx_predicted.pdf]

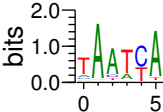

WebLogo 3.7.1

Supplement: SUPPLEMENTAL_Matl.zip [file Hnf1b_cisbp.pdf › pairlogos/Hnf1b_cisbp.pdf]



WebLogo 3.7.1

Supplement: SUPPLEMENTAL_Matl.zip [file Hnf1b_predicted.pdf › pairlogos/Hnf1b_predicted.pdf]

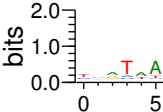

WebLogo 3.7.1

Supplement: SUPPLEMENTAL_Matl.zip [file Hoxd12_CONSTRUCT_cisbp.pdf › pairlogos/Hoxd12_CONSTRUCT_cisbp.pdf]



WebLogo 3.7.1

Supplement: SUPPLEMENTAL_Matl.zip [file Hoxd12_CONSTRUCT_predicted.pdf › pairlogos/Hoxd12_CONSTRUCT_predicted.pdf]

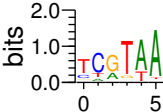

WebLogo 3.7.1

Supplement: SUPPLEMENTAL_Matl.zip [file Hoxd9_cisbp.pdf › pairlogos/Hoxd9_cisbp.pdf]



WebLogo 3.7.1

Supplement: SUPPLEMENTAL_Matl.zip [file Hoxd9_predicted.pdf › pairlogos/Hoxd9_predicted.pdf]

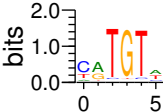

WebLogo 3.7.1

Supplement: SUPPLEMENTAL_Matl.zip [file IRX2_cisbp.pdf › pairlogos/IRX2_cisbp.pdf]

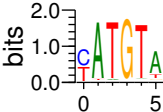

Supplement: SUPPLEMENTAL_Matl.zip [file IRX2_predicted.pdf › pairlogos/IRX2_predicted.pdf]

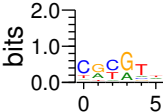

WebLogo 3.7.1

Supplement: SUPPLEMENTAL_Matl.zip [file IRX5_cisbp.pdf › pairlogos/IRX5_cisbp.pdf]



Supplement: SUPPLEMENTAL_Matl.zip [file IRX5_predicted.pdf › pairlogos/IRX5_predicted.pdf]

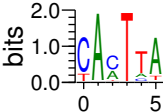

WebLogo 3.7.1

Supplement: SUPPLEMENTAL_Matl.zip [file ISL2_cisbp.pdf › pairlogos/ISL2_cisbp.pdf]

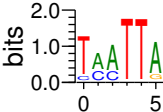

Supplement: SUPPLEMENTAL_Matl.zip [file ISL2_predicted.pdf › pairlogos/ISL2_predicted.pdf]

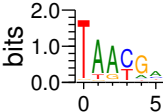

WebLogo 3.7.1

Supplement: SUPPLEMENTAL_Matl.zip [file ISX_cisbp.pdf › pairlogos/ISX_cisbp.pdf]

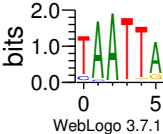

Supplement: SUPPLEMENTAL_Matl.zip [file ISX_predicted.pdf › pairlogos/ISX_predicted.pdf]

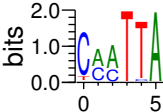

WebLogo 3.7.1

Supplement: SUPPLEMENTAL_Matl.zip [file Isl1_cisbp.pdf › pairlogos/Isl1_cisbp.pdf]



WebLogo 3.7.1

Supplement: SUPPLEMENTAL_Matl.zip [file Isl1_predicted.pdf › pairlogos/Isl1_predicted.pdf]
