# Supplementary figures and images for: Learning probabilistic protein–DNA recognition codes from DNA-binding specificities using structural mappings (part 5 of 25)
Source: HighWire-hosted journal article supplement (doi:10.1101/gr.276606.122), 2022-09-01

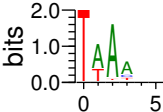

WebLogo 3.6.0

Supplement: SUPPLEMENTAL_Matl.zip [file HOXD12_RKKRIQNMK.pdf › SUPPLEMENTAL_Matl/rCLAMPS/STAMP/alignedLogos_NoyesGrps/logos_1/HOXD12_RKKRIQNMK.pdf]



WebLogo 3.6.0

Supplement: SUPPLEMENTAL_Matl.zip [file HOXD12_RKKRIQNMK_263.pdf › SUPPLEMENTAL_Matl/rCLAMPS/STAMP/alignedLogos_NoyesGrps/logos_1/HOXD12_RKKRIQNMK_263.pdf]

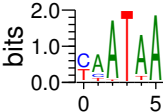

WebLogo 3.6.0

Supplement: SUPPLEMENTAL_Matl.zip [file HOXD13_RKKRIQNVK.pdf › SUPPLEMENTAL_Matl/rCLAMPS/STAMP/alignedLogos_NoyesGrps/logos_1/HOXD13_RKKRIQNVK.pdf]

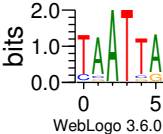

Supplement: SUPPLEMENTAL_Matl.zip [file HOXD1_SAIRIQNMK_260.pdf › SUPPLEMENTAL_Matl/rCLAMPS/STAMP/alignedLogos_NoyesGrps/logos_1/HOXD1_SAIRIQNMK_260.pdf]

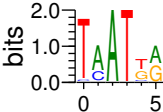

WebLogo 3.6.0

Supplement: SUPPLEMENTAL_Matl.zip [file HOXD4_KRSRIQNMK.pdf › SUPPLEMENTAL_Matl/rCLAMPS/STAMP/alignedLogos_NoyesGrps/logos_1/HOXD4_KRSRIQNMK.pdf]

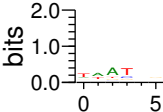

Supplement: SUPPLEMENTAL_Matl.zip [file HOXD8_RRGRIQNMK.pdf › SUPPLEMENTAL_Matl/rCLAMPS/STAMP/alignedLogos_NoyesGrps/logos_1/HOXD8_RRGRIQNMK.pdf]

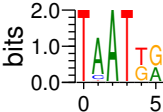

WebLogo 3.6.0

Supplement: SUPPLEMENTAL_Matl.zip [file HOXD8_RRGRIQNMK_264.pdf › SUPPLEMENTAL_Matl/rCLAMPS/STAMP/alignedLogos_NoyesGrps/logos_1/HOXD8_RRGRIQNMK_264.pdf]

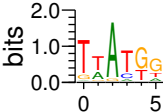

WebLogo 3.6.0

Supplement: SUPPLEMENTAL_Matl.zip [file HOXD9_RKKRIQNMK.pdf › SUPPLEMENTAL_Matl/rCLAMPS/STAMP/alignedLogos_NoyesGrps/logos_1/HOXD9_RKKRIQNMK.pdf]

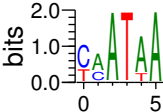

Supplement: SUPPLEMENTAL_Matl.zip [file HOXD9_RKKRIQNMK_265.pdf › SUPPLEMENTAL_Matl/rCLAMPS/STAMP/alignedLogos_NoyesGrps/logos_1/HOXD9_RKKRIQNMK_265.pdf]

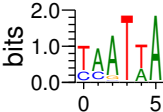

Supplement: SUPPLEMENTAL_Matl.zip [file HXD12_HETFR_RRKRIQNMK.pdf › SUPPLEMENTAL_Matl/rCLAMPS/STAMP/alignedLogos_NoyesGrps/logos_1/HXD12_HETFR_RRKRIQNMK.pdf]



WebLogo 3.6.0

Supplement: SUPPLEMENTAL_Matl.zip [file HXD12_HETFR_RRKRIQNMK_266.pdf › SUPPLEMENTAL_Matl/rCLAMPS/STAMP/alignedLogos_NoyesGrps/logos_1/HXD12_HETFR_RRKRIQNMK_266.pdf]

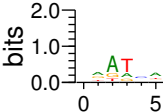

WebLogo 3.6.0

Supplement: SUPPLEMENTAL_Matl.zip [file Hdx_LQDRTGNRK_267.pdf › SUPPLEMENTAL_Matl/rCLAMPS/STAMP/alignedLogos_NoyesGrps/logos_1/Hdx_LQDRTGNRK_267.pdf]

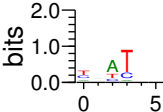

WebLogo 3.6.0

Supplement: SUPPLEMENTAL_Matl.zip [file Hlx_SWSRVQNMK.pdf › SUPPLEMENTAL_Matl/rCLAMPS/STAMP/alignedLogos_NoyesGrps/logos_1/Hlx_SWSRVQNMK.pdf]



WebLogo 3.6.0

Supplement: SUPPLEMENTAL_Matl.zip [file Hlx_SWSRVQNMK_268.pdf › SUPPLEMENTAL_Matl/rCLAMPS/STAMP/alignedLogos_NoyesGrps/logos_1/Hlx_SWSRVQNMK_268.pdf]

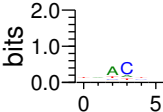

WebLogo 3.6.0

Supplement: SUPPLEMENTAL_Matl.zip [file Hmbox1_RGSRNANKE_269.pdf › SUPPLEMENTAL_Matl/rCLAMPS/STAMP/alignedLogos_NoyesGrps/logos_1/Hmbox1_RGSRNANKE_269.pdf]

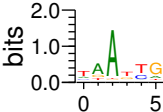

WebLogo 3.6.0

Supplement: SUPPLEMENTAL_Matl.zip [file Hmx1_KKTRIQNNK_271.pdf › SUPPLEMENTAL_Matl/rCLAMPS/STAMP/alignedLogos_NoyesGrps/logos_1/Hmx1_KKTRIQNNK_271.pdf]

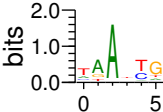

WebLogo 3.6.0

Supplement: SUPPLEMENTAL_Matl.zip [file Hmx2_KKTRTQNNK_272.pdf › SUPPLEMENTAL_Matl/rCLAMPS/STAMP/alignedLogos_NoyesGrps/logos_1/Hmx2_KKTRTQNNK_272.pdf]

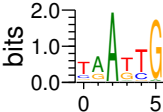

WebLogo 3.6.0

Supplement: SUPPLEMENTAL_Matl.zip [file Hmx_KKTRIQNNK.pdf › SUPPLEMENTAL_Matl/rCLAMPS/STAMP/alignedLogos_NoyesGrps/logos_1/Hmx_KKTRIQNNK.pdf]



WebLogo 3.6.0

Supplement: SUPPLEMENTAL_Matl.zip [file Hmx_KKTRIQNNK_270.pdf › SUPPLEMENTAL_Matl/rCLAMPS/STAMP/alignedLogos_NoyesGrps/logos_1/Hmx_KKTRIQNNK_270.pdf]

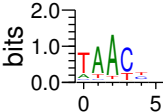

WebLogo 3.6.0

Supplement: SUPPLEMENTAL_Matl.zip [file Hnf1a_RRNRNANKE_273.pdf › SUPPLEMENTAL_Matl/rCLAMPS/STAMP/alignedLogos_NoyesGrps/logos_1/Hnf1a_RRNRNANKE_273.pdf]

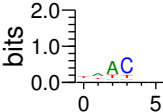

Supplement: SUPPLEMENTAL_Matl.zip [file Hnf1b_RRNRNANKE_274.pdf › SUPPLEMENTAL_Matl/rCLAMPS/STAMP/alignedLogos_NoyesGrps/logos_1/Hnf1b_RRNRNANKE_274.pdf]

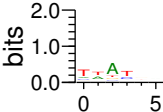

Supplement: SUPPLEMENTAL_Matl.zip [file Hoxa10_RKKRIQNMK_276.pdf › SUPPLEMENTAL_Matl/rCLAMPS/STAMP/alignedLogos_NoyesGrps/logos_1/Hoxa10_RKKRIQNMK_276.pdf]

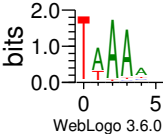

Supplement: SUPPLEMENTAL_Matl.zip [file Hoxa11_RKKRIQNMK_277.pdf › SUPPLEMENTAL_Matl/rCLAMPS/STAMP/alignedLogos_NoyesGrps/logos_1/Hoxa11_RKKRIQNMK_277.pdf]

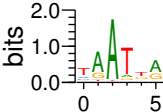

WebLogo 3.6.0

Supplement: SUPPLEMENTAL_Matl.zip [file Hoxa1_NAVRIQNMK_275.pdf › SUPPLEMENTAL_Matl/rCLAMPS/STAMP/alignedLogos_NoyesGrps/logos_1/Hoxa1_NAVRIQNMK_275.pdf]

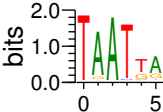

WebLogo 3.6.0

Supplement: SUPPLEMENTAL_Matl.zip [file Hoxa2_RRLRVQNMK_278.pdf › SUPPLEMENTAL_Matl/rCLAMPS/STAMP/alignedLogos_NoyesGrps/logos_1/Hoxa2_RRLRVQNMK_278.pdf]

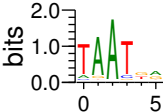

WebLogo 3.6.0

Supplement: SUPPLEMENTAL_Matl.zip [file Hoxa3_KRARIQNMK.pdf › SUPPLEMENTAL_Matl/rCLAMPS/STAMP/alignedLogos_NoyesGrps/logos_1/Hoxa3_KRARIQNMK.pdf]



WebLogo 3.6.0

Supplement: SUPPLEMENTAL_Matl.zip [file Hoxa3_KRARIQNMK_279.pdf › SUPPLEMENTAL_Matl/rCLAMPS/STAMP/alignedLogos_NoyesGrps/logos_1/Hoxa3_KRARIQNMK_279.pdf]

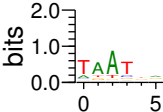

WebLogo 3.6.0

Supplement: SUPPLEMENTAL_Matl.zip [file Hoxa5_KRARIQNMK_280.pdf › SUPPLEMENTAL_Matl/rCLAMPS/STAMP/alignedLogos_NoyesGrps/logos_1/Hoxa5_KRARIQNMK_280.pdf]

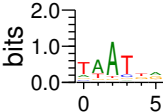

WebLogo 3.6.0

Supplement: SUPPLEMENTAL_Matl.zip [file Hoxa6_RRGRIQNMK_281.pdf › SUPPLEMENTAL_Matl/rCLAMPS/STAMP/alignedLogos_NoyesGrps/logos_1/Hoxa6_RRGRIQNMK_281.pdf]

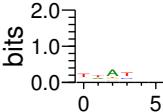

Supplement: SUPPLEMENTAL_Matl.zip [file Hoxa9_RKKRIQNMK_282.pdf › SUPPLEMENTAL_Matl/rCLAMPS/STAMP/alignedLogos_NoyesGrps/logos_1/Hoxa9_RKKRIQNMK_282.pdf]

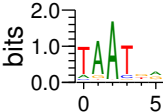

WebLogo 3.6.0

Supplement: SUPPLEMENTAL_Matl.zip [file Hoxb3_KRARIQNMK_283.pdf › SUPPLEMENTAL_Matl/rCLAMPS/STAMP/alignedLogos_NoyesGrps/logos_1/Hoxb3_KRARIQNMK_283.pdf]

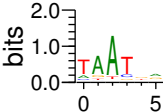

WebLogo 3.6.0

Supplement: SUPPLEMENTAL_Matl.zip [file Hoxb4_KRSRIQNMK.pdf › SUPPLEMENTAL_Matl/rCLAMPS/STAMP/alignedLogos_NoyesGrps/logos_1/Hoxb4_KRSRIQNMK.pdf]

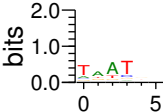

WebLogo 3.6.0

Supplement: SUPPLEMENTAL_Matl.zip [file Hoxb5_KRARIQNMK_284.pdf › SUPPLEMENTAL_Matl/rCLAMPS/STAMP/alignedLogos_NoyesGrps/logos_1/Hoxb5_KRARIQNMK_284.pdf]

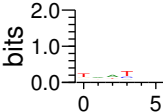

WebLogo 3.6.0

Supplement: SUPPLEMENTAL_Matl.zip [file Hoxb6_RRGRIQNMK_285.pdf › SUPPLEMENTAL_Matl/rCLAMPS/STAMP/alignedLogos_NoyesGrps/logos_1/Hoxb6_RRGRIQNMK_285.pdf]

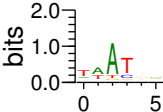

Supplement: SUPPLEMENTAL_Matl.zip [file Hoxb8_RRGRIQNMK_286.pdf › SUPPLEMENTAL_Matl/rCLAMPS/STAMP/alignedLogos_NoyesGrps/logos_1/Hoxb8_RRGRIQNMK_286.pdf]

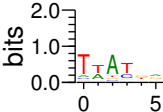

Supplement: SUPPLEMENTAL_Matl.zip [file Hoxb9_RKKRIQNMK_287.pdf › SUPPLEMENTAL_Matl/rCLAMPS/STAMP/alignedLogos_NoyesGrps/logos_1/Hoxb9_RKKRIQNMK_287.pdf]

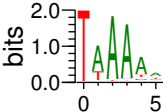

WebLogo 3.6.0

Supplement: SUPPLEMENTAL_Matl.zip [file Hoxc10_RKKRIQNMK_288.pdf › SUPPLEMENTAL_Matl/rCLAMPS/STAMP/alignedLogos_NoyesGrps/logos_1/Hoxc10_RKKRIQNMK_288.pdf]

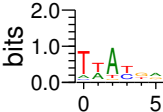

WebLogo 3.6.0

Supplement: SUPPLEMENTAL_Matl.zip [file Hoxc11_RKKRIQNMK_289.pdf › SUPPLEMENTAL_Matl/rCLAMPS/STAMP/alignedLogos_NoyesGrps/logos_1/Hoxc11_RKKRIQNMK_289.pdf]

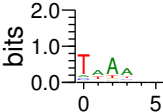

Supplement: SUPPLEMENTAL_Matl.zip [file Hoxc12_RKKRIQNMK_290.pdf › SUPPLEMENTAL_Matl/rCLAMPS/STAMP/alignedLogos_NoyesGrps/logos_1/Hoxc12_RKKRIQNMK_290.pdf]

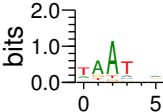

Supplement: SUPPLEMENTAL_Matl.zip [file Hoxc5_KRSRIQNMK.pdf › SUPPLEMENTAL_Matl/rCLAMPS/STAMP/alignedLogos_NoyesGrps/logos_1/Hoxc5_KRSRIQNMK.pdf]

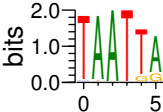

WebLogo 3.6.0

Supplement: SUPPLEMENTAL_Matl.zip [file Hoxc6_RRGRIQNMK.pdf › SUPPLEMENTAL_Matl/rCLAMPS/STAMP/alignedLogos_NoyesGrps/logos_1/Hoxc6_RRGRIQNMK.pdf]

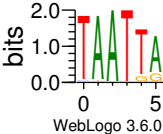

Supplement: SUPPLEMENTAL_Matl.zip [file Hoxc6_RRGRIQNMK_291.pdf › SUPPLEMENTAL_Matl/rCLAMPS/STAMP/alignedLogos_NoyesGrps/logos_1/Hoxc6_RRGRIQNMK_291.pdf]

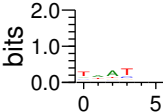

WebLogo 3.6.0

Supplement: SUPPLEMENTAL_Matl.zip [file Hoxc8_RSGRIQNMK.pdf › SUPPLEMENTAL_Matl/rCLAMPS/STAMP/alignedLogos_NoyesGrps/logos_1/Hoxc8_RSGRIQNMK.pdf]



WebLogo 3.6.0

Supplement: SUPPLEMENTAL_Matl.zip [file Hoxc8_RSGRIQNMK_292.pdf › SUPPLEMENTAL_Matl/rCLAMPS/STAMP/alignedLogos_NoyesGrps/logos_1/Hoxc8_RSGRIQNMK_292.pdf]

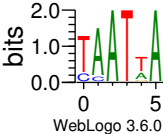

Supplement: SUPPLEMENTAL_Matl.zip [file Hoxc9_RKKRIQNMK_293.pdf › SUPPLEMENTAL_Matl/rCLAMPS/STAMP/alignedLogos_NoyesGrps/logos_1/Hoxc9_RKKRIQNMK_293.pdf]



Supplement: SUPPLEMENTAL_Matl.zip [file Hoxc9_RKRRIQNMK.pdf › SUPPLEMENTAL_Matl/rCLAMPS/STAMP/alignedLogos_NoyesGrps/logos_1/Hoxc9_RKRRIQNMK.pdf]

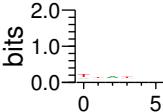

WebLogo 3.6.0

Supplement: SUPPLEMENTAL_Matl.zip [file Hoxd10_RKKRIQNMK_295.pdf › SUPPLEMENTAL_Matl/rCLAMPS/STAMP/alignedLogos_NoyesGrps/logos_1/Hoxd10_RKKRIQNMK_295.pdf]

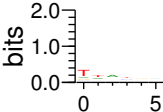

WebLogo 3.6.0

Supplement: SUPPLEMENTAL_Matl.zip [file Hoxd11_RKKRIQNMK_296.pdf › SUPPLEMENTAL_Matl/rCLAMPS/STAMP/alignedLogos_NoyesGrps/logos_1/Hoxd11_RKKRIQNMK_296.pdf]

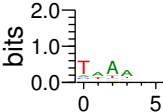

Supplement: SUPPLEMENTAL_Matl.zip [file Hoxd12_CONSTRUCT_RKKRIQNMK.pdf › SUPPLEMENTAL_Matl/rCLAMPS/STAMP/alignedLogos_NoyesGrps/logos_1/Hoxd12_CONSTRUCT_RKKRIQNMK.pdf]



Supplement: SUPPLEMENTAL_Matl.zip [file Hoxd12_CONSTRUCT_RKKRIQNMK_297.pdf › SUPPLEMENTAL_Matl/rCLAMPS/STAMP/alignedLogos_NoyesGrps/logos_1/Hoxd12_CONSTRUCT_RKKRIQNMK_297.pdf]

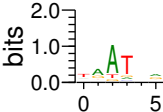

WebLogo 3.6.0

Supplement: SUPPLEMENTAL_Matl.zip [file Hoxd1_SAIRIQNMK_294.pdf › SUPPLEMENTAL_Matl/rCLAMPS/STAMP/alignedLogos_NoyesGrps/logos_1/Hoxd1_SAIRIQNMK_294.pdf]

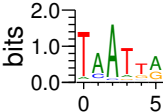

WebLogo 3.6.0

Supplement: SUPPLEMENTAL_Matl.zip [file Hoxd3_KRVRIQNMK.pdf › SUPPLEMENTAL_Matl/rCLAMPS/STAMP/alignedLogos_NoyesGrps/logos_1/Hoxd3_KRVRIQNMK.pdf]



WebLogo 3.6.0

Supplement: SUPPLEMENTAL_Matl.zip [file Hoxd3_KRVRIQNMK_298.pdf › SUPPLEMENTAL_Matl/rCLAMPS/STAMP/alignedLogos_NoyesGrps/logos_1/Hoxd3_KRVRIQNMK_298.pdf]



WebLogo 3.6.0

Supplement: SUPPLEMENTAL_Matl.zip [file Hoxd8_RRGRIQNMK_299.pdf › SUPPLEMENTAL_Matl/rCLAMPS/STAMP/alignedLogos_NoyesGrps/logos_1/Hoxd8_RRGRIQNMK_299.pdf]



WebLogo 3.6.0

Supplement: SUPPLEMENTAL_Matl.zip [file Hoxd9_RKKRIQNMK_300.pdf › SUPPLEMENTAL_Matl/rCLAMPS/STAMP/alignedLogos_NoyesGrps/logos_1/Hoxd9_RKKRIQNMK_300.pdf]

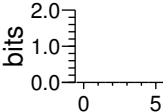

WebLogo 3.6.0

Supplement: SUPPLEMENTAL_Matl.zip [file IRX1_PKNATANRR_301.pdf › SUPPLEMENTAL_Matl/rCLAMPS/STAMP/alignedLogos_NoyesGrps/logos_1/IRX1_PKNATANRR_301.pdf]

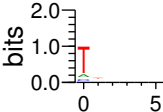

WebLogo 3.6.0

Supplement: SUPPLEMENTAL_Matl.zip [file IRX2_PAYRTANRR.pdf › SUPPLEMENTAL_Matl/rCLAMPS/STAMP/alignedLogos_NoyesGrps/logos_1/IRX2_PAYRTANRR.pdf]

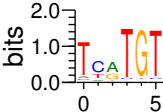

Supplement: SUPPLEMENTAL_Matl.zip [file IRX2_PAYRTANRR_302.pdf › SUPPLEMENTAL_Matl/rCLAMPS/STAMP/alignedLogos_NoyesGrps/logos_1/IRX2_PAYRTANRR_302.pdf]

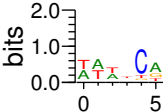

Supplement: SUPPLEMENTAL_Matl.zip [file IRX3_PKNATANRR_303.pdf › SUPPLEMENTAL_Matl/rCLAMPS/STAMP/alignedLogos_NoyesGrps/logos_1/IRX3_PKNATANRR_303.pdf]

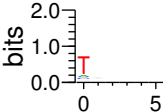

WebLogo 3.6.0

Supplement: SUPPLEMENTAL_Matl.zip [file IRX5_PAYRTANRR.pdf › SUPPLEMENTAL_Matl/rCLAMPS/STAMP/alignedLogos_NoyesGrps/logos_1/IRX5_PAYRTANRR.pdf]

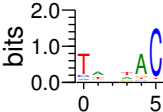

Supplement: SUPPLEMENTAL_Matl.zip [file IRX5_PAYRTANRR_304.pdf › SUPPLEMENTAL_Matl/rCLAMPS/STAMP/alignedLogos_NoyesGrps/logos_1/IRX5_PAYRTANRR_304.pdf]

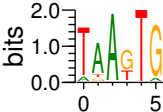

WebLogo 3.6.0

Supplement: SUPPLEMENTAL_Matl.zip [file ISL1_TRVRVQNCK.pdf › SUPPLEMENTAL_Matl/rCLAMPS/STAMP/alignedLogos_NoyesGrps/logos_1/ISL1_TRVRVQNCK.pdf]



WebLogo 3.6.0

Supplement: SUPPLEMENTAL_Matl.zip [file ISL1_TRVRVQNCK_305.pdf › SUPPLEMENTAL_Matl/rCLAMPS/STAMP/alignedLogos_NoyesGrps/logos_1/ISL1_TRVRVQNCK_305.pdf]

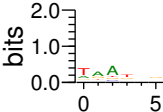

WebLogo 3.6.0

Supplement: SUPPLEMENTAL_Matl.zip [file ISL2_TRVRVQNCK.pdf › SUPPLEMENTAL_Matl/rCLAMPS/STAMP/alignedLogos_NoyesGrps/logos_1/ISL2_TRVRVQNCK.pdf]

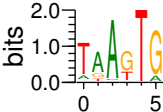

WebLogo 3.6.0

Supplement: SUPPLEMENTAL_Matl.zip [file ISL2_TRVRVQNCK_306.pdf › SUPPLEMENTAL_Matl/rCLAMPS/STAMP/alignedLogos_NoyesGrps/logos_1/ISL2_TRVRVQNCK_306.pdf]

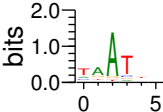

WebLogo 3.6.0

Supplement: SUPPLEMENTAL_Matl.zip [file ISX_RRVRIQNAK.pdf › SUPPLEMENTAL_Matl/rCLAMPS/STAMP/alignedLogos_NoyesGrps/logos_1/ISX_RRVRIQNAK.pdf]

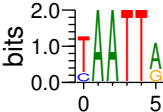

WebLogo 3.6.0

Supplement: SUPPLEMENTAL_Matl.zip [file ISX_RRVRIQNAK_307.pdf › SUPPLEMENTAL_Matl/rCLAMPS/STAMP/alignedLogos_NoyesGrps/logos_1/ISX_RRVRIQNAK_307.pdf]

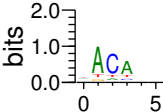

WebLogo 3.6.0

Supplement: SUPPLEMENTAL_Matl.zip [file Irx2_PAYRTANRR_308.pdf › SUPPLEMENTAL_Matl/rCLAMPS/STAMP/alignedLogos_NoyesGrps/logos_1/Irx2_PAYRTANRR_308.pdf]

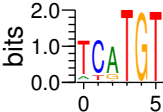

WebLogo 3.6.0

Supplement: SUPPLEMENTAL_Matl.zip [file Irx3_PKNATANRR_309.pdf › SUPPLEMENTAL_Matl/rCLAMPS/STAMP/alignedLogos_NoyesGrps/logos_1/Irx3_PKNATANRR_309.pdf]

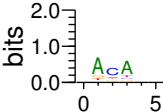

Supplement: SUPPLEMENTAL_Matl.zip [file Irx4_GTRRTANRR_310.pdf › SUPPLEMENTAL_Matl/rCLAMPS/STAMP/alignedLogos_NoyesGrps/logos_1/Irx4_GTRRTANRR_310.pdf]

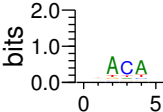

WebLogo 3.6.0

Supplement: SUPPLEMENTAL_Matl.zip [file Irx5_PAYRTANRR_311.pdf › SUPPLEMENTAL_Matl/rCLAMPS/STAMP/alignedLogos_NoyesGrps/logos_1/Irx5_PAYRTANRR_311.pdf]

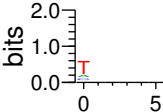

WebLogo 3.6.0

Supplement: SUPPLEMENTAL_Matl.zip [file Irx6_AGRRTANRR.pdf › SUPPLEMENTAL_Matl/rCLAMPS/STAMP/alignedLogos_NoyesGrps/logos_1/Irx6_AGRRTANRR.pdf]

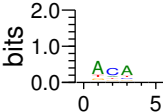

WebLogo 3.6.0

Supplement: SUPPLEMENTAL_Matl.zip [file Irx6_AGRRTANRR_312.pdf › SUPPLEMENTAL_Matl/rCLAMPS/STAMP/alignedLogos_NoyesGrps/logos_1/Irx6_AGRRTANRR_312.pdf]

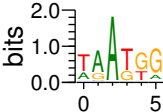

Supplement: SUPPLEMENTAL_Matl.zip [file Isl1_TRVRVQNCK_313.pdf › SUPPLEMENTAL_Matl/rCLAMPS/STAMP/alignedLogos_NoyesGrps/logos_1/Isl1_TRVRVQNCK_313.pdf]



Supplement: SUPPLEMENTAL_Matl.zip [file Isl2_TRVRVQNCK_314.pdf › SUPPLEMENTAL_Matl/rCLAMPS/STAMP/alignedLogos_NoyesGrps/logos_1/Isl2_TRVRVQNCK_314.pdf]



WebLogo 3.6.0

Supplement: SUPPLEMENTAL_Matl.zip [file Isx_RRVRIQNAK_315.pdf › SUPPLEMENTAL_Matl/rCLAMPS/STAMP/alignedLogos_NoyesGrps/logos_1/Isx_RRVRIQNAK_315.pdf]

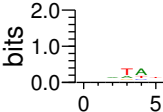

WebLogo 3.6.0

Supplement: SUPPLEMENTAL_Matl.zip [file KLLA0_D10043g_KSKRIQNSK.pdf › SUPPLEMENTAL_Matl/rCLAMPS/STAMP/alignedLogos_NoyesGrps/logos_1/KLLA0_D10043g_KSKRIQNSK.pdf]



Supplement: SUPPLEMENTAL_Matl.zip [file KLLA0_D10043g_KSKRIQNSK_316.pdf › SUPPLEMENTAL_Matl/rCLAMPS/STAMP/alignedLogos_NoyesGrps/logos_1/KLLA0_D10043g_KSKRIQNSK_316.pdf]

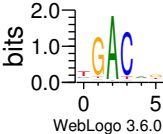

Supplement: SUPPLEMENTAL_Matl.zip [file KNAT3_AGKLNINKR_317.pdf › SUPPLEMENTAL_Matl/rCLAMPS/STAMP/alignedLogos_NoyesGrps/logos_1/KNAT3_AGKLNINKR_317.pdf]

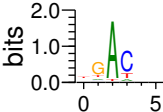

WebLogo 3.6.0

Supplement: SUPPLEMENTAL_Matl.zip [file KNAT4_AGKLNINKR_318.pdf › SUPPLEMENTAL_Matl/rCLAMPS/STAMP/alignedLogos_NoyesGrps/logos_1/KNAT4_AGKLNINKR_318.pdf]

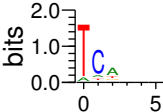

Supplement: SUPPLEMENTAL_Matl.zip [file KNAT6_KGKLNINKR.pdf › SUPPLEMENTAL_Matl/rCLAMPS/STAMP/alignedLogos_NoyesGrps/logos_1/KNAT6_KGKLNINKR.pdf]

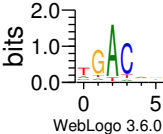

Supplement: SUPPLEMENTAL_Matl.zip [file KNAT6_KGKLNINKR_319.pdf › SUPPLEMENTAL_Matl/rCLAMPS/STAMP/alignedLogos_NoyesGrps/logos_1/KNAT6_KGKLNINKR_319.pdf]

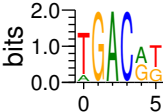

WebLogo 3.6.0

Supplement: SUPPLEMENTAL_Matl.zip [file KNAT7_AGKLNINKR_320.pdf › SUPPLEMENTAL_Matl/rCLAMPS/STAMP/alignedLogos_NoyesGrps/logos_1/KNAT7_AGKLNINKR_320.pdf]

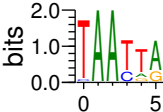

WebLogo 3.6.0

Supplement: SUPPLEMENTAL_Matl.zip [file LBX1_RKSRTQNAK.pdf › SUPPLEMENTAL_Matl/rCLAMPS/STAMP/alignedLogos_NoyesGrps/logos_1/LBX1_RKSRTQNAK.pdf]



WebLogo 3.6.0

Supplement: SUPPLEMENTAL_Matl.zip [file LBX1_RKSRTQNAK_321.pdf › SUPPLEMENTAL_Matl/rCLAMPS/STAMP/alignedLogos_NoyesGrps/logos_1/LBX1_RKSRTQNAK_321.pdf]

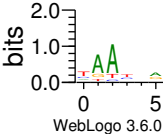

Supplement: SUPPLEMENTAL_Matl.zip [file LBX2_RKSRTQNAK.pdf › SUPPLEMENTAL_Matl/rCLAMPS/STAMP/alignedLogos_NoyesGrps/logos_1/LBX2_RKSRTQNAK.pdf]

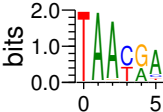

WebLogo 3.6.0

Supplement: SUPPLEMENTAL_Matl.zip [file LBX2_RKSRTQNAK_322.pdf › SUPPLEMENTAL_Matl/rCLAMPS/STAMP/alignedLogos_NoyesGrps/logos_1/LBX2_RKSRTQNAK_322.pdf]

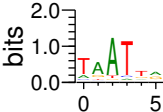

WebLogo 3.6.0

Supplement: SUPPLEMENTAL_Matl.zip [file LHX1_RGPRVQNSK.pdf › SUPPLEMENTAL_Matl/rCLAMPS/STAMP/alignedLogos_NoyesGrps/logos_1/LHX1_RGPRVQNSK.pdf]

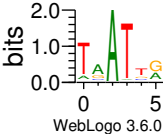

Supplement: SUPPLEMENTAL_Matl.zip [file LHX1_RGPRVQNSK_323.pdf › SUPPLEMENTAL_Matl/rCLAMPS/STAMP/alignedLogos_NoyesGrps/logos_1/LHX1_RGPRVQNSK_323.pdf]

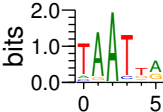

Supplement: SUPPLEMENTAL_Matl.zip [file LHX2_KRMRVQNAK.pdf › SUPPLEMENTAL_Matl/rCLAMPS/STAMP/alignedLogos_NoyesGrps/logos_1/LHX2_KRMRVQNAK.pdf]

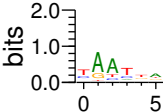

WebLogo 3.6.0

Supplement: SUPPLEMENTAL_Matl.zip [file LHX2_KRMRVQNAK_324.pdf › SUPPLEMENTAL_Matl/rCLAMPS/STAMP/alignedLogos_NoyesGrps/logos_1/LHX2_KRMRVQNAK_324.pdf]

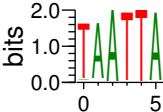

WebLogo 3.6.0

Supplement: SUPPLEMENTAL_Matl.zip [file LHX3_KRPRVQNAK_325.pdf › SUPPLEMENTAL_Matl/rCLAMPS/STAMP/alignedLogos_NoyesGrps/logos_1/LHX3_KRPRVQNAK_325.pdf]

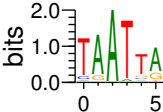

WebLogo 3.6.0

Supplement: SUPPLEMENTAL_Matl.zip [file LHX4_KRPRVQNAK.pdf › SUPPLEMENTAL_Matl/rCLAMPS/STAMP/alignedLogos_NoyesGrps/logos_1/LHX4_KRPRVQNAK.pdf]

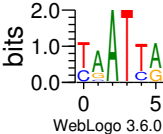

Supplement: SUPPLEMENTAL_Matl.zip [file LHX4_KRPRVQNAK_326.pdf › SUPPLEMENTAL_Matl/rCLAMPS/STAMP/alignedLogos_NoyesGrps/logos_1/LHX4_KRPRVQNAK_326.pdf]

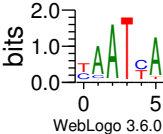

Supplement: SUPPLEMENTAL_Matl.zip [file LHX6_KRARVQNAR.pdf › SUPPLEMENTAL_Matl/rCLAMPS/STAMP/alignedLogos_NoyesGrps/logos_1/LHX6_KRARVQNAR.pdf]

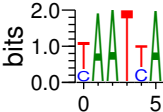

WebLogo 3.6.0

Supplement: SUPPLEMENTAL_Matl.zip [file LHX6_KRARVQNAR_327.pdf › SUPPLEMENTAL_Matl/rCLAMPS/STAMP/alignedLogos_NoyesGrps/logos_1/LHX6_KRARVQNAR_327.pdf]

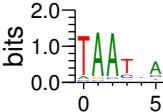

WebLogo 3.6.0

Supplement: SUPPLEMENTAL_Matl.zip [file LHX9_KRMRVQNAK.pdf › SUPPLEMENTAL_Matl/rCLAMPS/STAMP/alignedLogos_NoyesGrps/logos_1/LHX9_KRMRVQNAK.pdf]



WebLogo 3.6.0

Supplement: SUPPLEMENTAL_Matl.zip [file LHX9_KRMRVQNAK_328.pdf › SUPPLEMENTAL_Matl/rCLAMPS/STAMP/alignedLogos_NoyesGrps/logos_1/LHX9_KRMRVQNAK_328.pdf]

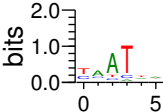

WebLogo 3.6.0

Supplement: SUPPLEMENTAL_Matl.zip [file LMX1A_KRPRVQNAK.pdf › SUPPLEMENTAL_Matl/rCLAMPS/STAMP/alignedLogos_NoyesGrps/logos_1/LMX1A_KRPRVQNAK.pdf]

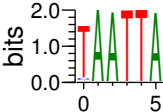

WebLogo 3.6.0

Supplement: SUPPLEMENTAL_Matl.zip [file LMX1A_KRPRVQNAK_329.pdf › SUPPLEMENTAL_Matl/rCLAMPS/STAMP/alignedLogos_NoyesGrps/logos_1/LMX1A_KRPRVQNAK_329.pdf]
