# Supplementary figures and images for: Learning probabilistic protein–DNA recognition codes from DNA-binding specificities using structural mappings (part 22 of 25)
Source: HighWire-hosted journal article supplement (doi:10.1101/gr.276606.122), 2022-09-01

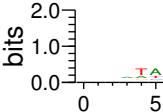

WebLogo 3.7.1

Supplement: SUPPLEMENTAL_Matl.zip [file KLLA0_D10043g_cisbp.pdf › pairlogos/KLLA0_D10043g_cisbp.pdf]

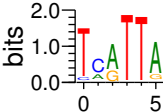

WebLogo 3.7.1

Supplement: SUPPLEMENTAL_Matl.zip [file KLLA0_D10043g_predicted.pdf › pairlogos/KLLA0_D10043g_predicted.pdf]

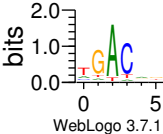

Supplement: SUPPLEMENTAL_Matl.zip [file KNAT6_cisbp.pdf › pairlogos/KNAT6_cisbp.pdf]

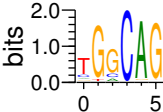

WebLogo 3.7.1

Supplement: SUPPLEMENTAL_Matl.zip [file KNAT6_predicted.pdf › pairlogos/KNAT6_predicted.pdf]

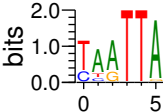

WebLogo 3.7.1

Supplement: SUPPLEMENTAL_Matl.zip [file LBX1_cisbp.pdf › pairlogos/LBX1_cisbp.pdf]

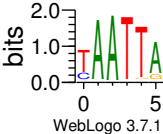

Supplement: SUPPLEMENTAL_Matl.zip [file LBX1_predicted.pdf › pairlogos/LBX1_predicted.pdf]

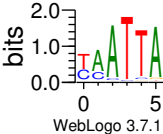

Supplement: SUPPLEMENTAL_Matl.zip [file LBX2_cisbp.pdf › pairlogos/LBX2_cisbp.pdf]

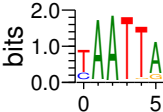

WebLogo 3.7.1

Supplement: SUPPLEMENTAL_Matl.zip [file LBX2_predicted.pdf › pairlogos/LBX2_predicted.pdf]

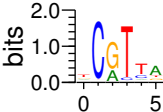

Supplement: SUPPLEMENTAL_Matl.zip [file LHX1_cisbp.pdf › pairlogos/LHX1_cisbp.pdf]

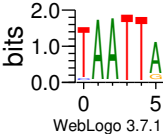

Supplement: SUPPLEMENTAL_Matl.zip [file LHX1_predicted.pdf › pairlogos/LHX1_predicted.pdf]

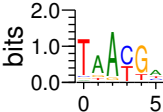

WebLogo 3.7.1

Supplement: SUPPLEMENTAL_Matl.zip [file LHX4_cisbp.pdf › pairlogos/LHX4_cisbp.pdf]

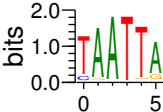

WebLogo 3.7.1

Supplement: SUPPLEMENTAL_Matl.zip [file LHX4_predicted.pdf › pairlogos/LHX4_predicted.pdf]

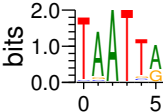

WebLogo 3.7.1

Supplement: SUPPLEMENTAL_Matl.zip [file LHX5_cisbp.pdf › pairlogos/LHX5_cisbp.pdf]

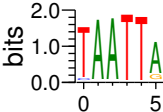

WebLogo 3.7.1

Supplement: SUPPLEMENTAL_Matl.zip [file LHX5_predicted.pdf › pairlogos/LHX5_predicted.pdf]

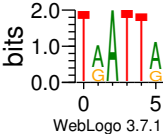

Supplement: SUPPLEMENTAL_Matl.zip [file LHX6_cisbp.pdf › pairlogos/LHX6_cisbp.pdf]

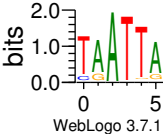

Supplement: SUPPLEMENTAL_Matl.zip [file LHX6_predicted.pdf › pairlogos/LHX6_predicted.pdf]

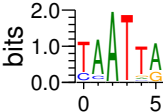

Supplement: SUPPLEMENTAL_Matl.zip [file LMX1A_cisbp.pdf › pairlogos/LMX1A_cisbp.pdf]



WebLogo 3.7.1

Supplement: SUPPLEMENTAL_Matl.zip [file LMX1A_predicted.pdf › pairlogos/LMX1A_predicted.pdf]

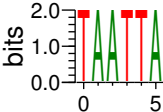

WebLogo 3.7.1

Supplement: SUPPLEMENTAL_Matl.zip [file LMX1B_cisbp.pdf › pairlogos/LMX1B_cisbp.pdf]



WebLogo 3.7.1

Supplement: SUPPLEMENTAL_Matl.zip [file LMX1B_predicted.pdf › pairlogos/LMX1B_predicted.pdf]

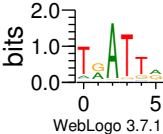

Supplement: SUPPLEMENTAL_Matl.zip [file Lhx6_CONSTRUCT_cisbp.pdf › pairlogos/Lhx6_CONSTRUCT_cisbp.pdf]



Supplement: SUPPLEMENTAL_Matl.zip [file Lhx6_CONSTRUCT_predicted.pdf › pairlogos/Lhx6_CONSTRUCT_predicted.pdf]

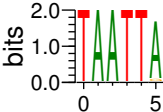

WebLogo 3.7.1

Supplement: SUPPLEMENTAL_Matl.zip [file Lim1_cisbp.pdf › pairlogos/Lim1_cisbp.pdf]



Supplement: SUPPLEMENTAL_Matl.zip [file Lim1_predicted.pdf › pairlogos/Lim1_predicted.pdf]

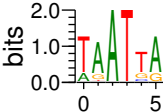

Supplement: SUPPLEMENTAL_Matl.zip [file Lim3_cisbp.pdf › pairlogos/Lim3_cisbp.pdf]



WebLogo 3.7.1

Supplement: SUPPLEMENTAL_Matl.zip [file Lim3_predicted.pdf › pairlogos/Lim3_predicted.pdf]

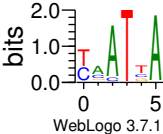

Supplement: SUPPLEMENTAL_Matl.zip [file MEOX2_cisbp.pdf › pairlogos/MEOX2_cisbp.pdf]

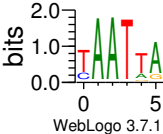

Supplement: SUPPLEMENTAL_Matl.zip [file MEOX2_predicted.pdf › pairlogos/MEOX2_predicted.pdf]

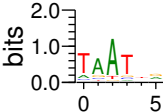

WebLogo 3.7.1

Supplement: SUPPLEMENTAL_Matl.zip [file MNX1_cisbp.pdf › pairlogos/MNX1_cisbp.pdf]

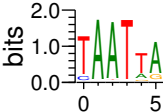

WebLogo 3.7.1

Supplement: SUPPLEMENTAL_Matl.zip [file MNX1_predicted.pdf › pairlogos/MNX1_predicted.pdf]

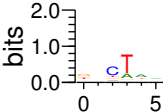

WebLogo 3.7.1

Supplement: SUPPLEMENTAL_Matl.zip [file MTR_2g038000_cisbp.pdf › pairlogos/MTR_2g038000_cisbp.pdf]

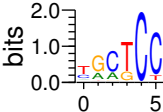

WebLogo 3.7.1

Supplement: SUPPLEMENTAL_Matl.zip [file MTR_2g038000_predicted.pdf › pairlogos/MTR_2g038000_predicted.pdf]

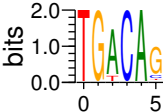

WebLogo 3.7.1

Supplement: SUPPLEMENTAL_Matl.zip [file Meis2_cisbp.pdf › pairlogos/Meis2_cisbp.pdf]

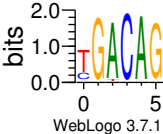

Supplement: SUPPLEMENTAL_Matl.zip [file Meis2_predicted.pdf › pairlogos/Meis2_predicted.pdf]

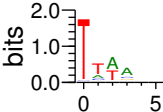

WebLogo 3.7.1

Supplement: SUPPLEMENTAL_Matl.zip [file NCU03266_cisbp.pdf › pairlogos/NCU03266_cisbp.pdf]

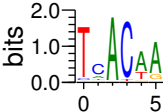

WebLogo 3.7.1

Supplement: SUPPLEMENTAL_Matl.zip [file NCU03266_predicted.pdf › pairlogos/NCU03266_predicted.pdf]

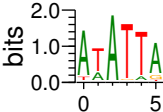

Supplement: SUPPLEMENTAL_Matl.zip [file NCU09556_cisbp.pdf › pairlogos/NCU09556_cisbp.pdf]

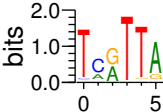

Supplement: SUPPLEMENTAL_Matl.zip [file NCU09556_predicted.pdf › pairlogos/NCU09556_predicted.pdf]

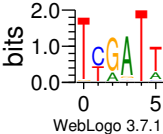

Supplement: SUPPLEMENTAL_Matl.zip [file NEMVEDRAFT_v1g101664_cisbp.pdf › pairlogos/NEMVEDRAFT_v1g101664_cisbp.pdf]

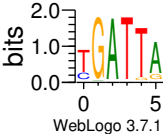

Supplement: SUPPLEMENTAL_Matl.zip [file NEMVEDRAFT_v1g101664_predicted.pdf › pairlogos/NEMVEDRAFT_v1g101664_predicted.pdf]

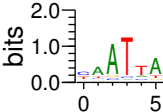

WebLogo 3.7.1

Supplement: SUPPLEMENTAL_Matl.zip [file NEMVEDRAFT_v1g105595_cisbp.pdf › pairlogos/NEMVEDRAFT_v1g105595_cisbp.pdf]

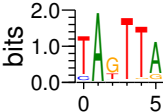

WebLogo 3.7.1

Supplement: SUPPLEMENTAL_Matl.zip [file NEMVEDRAFT_v1g105595_predicted.pdf › pairlogos/NEMVEDRAFT_v1g105595_predicted.pdf]

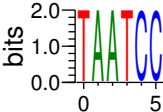

WebLogo 3.7.1

Supplement: SUPPLEMENTAL_Matl.zip [file NEMVEDRAFT_v1g113057_cisbp.pdf › pairlogos/NEMVEDRAFT_v1g113057_cisbp.pdf]

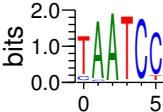

WebLogo 3.7.1

Supplement: SUPPLEMENTAL_Matl.zip [file NEMVEDRAFT_v1g113057_predicted.pdf › pairlogos/NEMVEDRAFT_v1g113057_predicted.pdf]

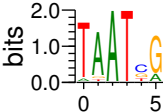

WebLogo 3.7.1

Supplement: SUPPLEMENTAL_Matl.zip [file NEMVEDRAFT_v1g114268_cisbp.pdf › pairlogos/NEMVEDRAFT_v1g114268_cisbp.pdf]

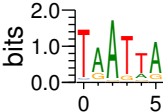

WebLogo 3.7.1

Supplement: SUPPLEMENTAL_Matl.zip [file NEMVEDRAFT_v1g114268_predicted.pdf › pairlogos/NEMVEDRAFT_v1g114268_predicted.pdf]

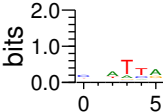

WebLogo 3.7.1

Supplement: SUPPLEMENTAL_Matl.zip [file NEMVEDRAFT_v1g129868_cisbp.pdf › pairlogos/NEMVEDRAFT_v1g129868_cisbp.pdf]

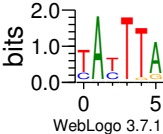

Supplement: SUPPLEMENTAL_Matl.zip [file NEMVEDRAFT_v1g129868_predicted.pdf › pairlogos/NEMVEDRAFT_v1g129868_predicted.pdf]

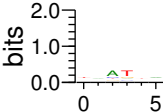

WebLogo 3.7.1

Supplement: SUPPLEMENTAL_Matl.zip [file NEMVEDRAFT_v1g136480_cisbp.pdf › pairlogos/NEMVEDRAFT_v1g136480_cisbp.pdf]

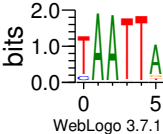

Supplement: SUPPLEMENTAL_Matl.zip [file NEMVEDRAFT_v1g136480_predicted.pdf › pairlogos/NEMVEDRAFT_v1g136480_predicted.pdf]

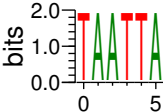

WebLogo 3.7.1

Supplement: SUPPLEMENTAL_Matl.zip [file NEMVEDRAFT_v1g164989_cisbp.pdf › pairlogos/NEMVEDRAFT_v1g164989_cisbp.pdf]

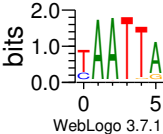

Supplement: SUPPLEMENTAL_Matl.zip [file NEMVEDRAFT_v1g164989_predicted.pdf › pairlogos/NEMVEDRAFT_v1g164989_predicted.pdf]

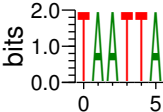

WebLogo 3.7.1

Supplement: SUPPLEMENTAL_Matl.zip [file NEMVEDRAFT_v1g205636_cisbp.pdf › pairlogos/NEMVEDRAFT_v1g205636_cisbp.pdf]

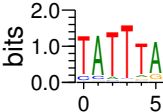

WebLogo 3.7.1

Supplement: SUPPLEMENTAL_Matl.zip [file NEMVEDRAFT_v1g205636_predicted.pdf › pairlogos/NEMVEDRAFT_v1g205636_predicted.pdf]

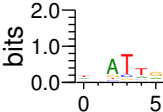

WebLogo 3.7.1

Supplement: SUPPLEMENTAL_Matl.zip [file NEMVEDRAFT_v1g80394_cisbp.pdf › pairlogos/NEMVEDRAFT_v1g80394_cisbp.pdf]

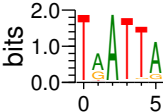

WebLogo 3.7.1

Supplement: SUPPLEMENTAL_Matl.zip [file NEMVEDRAFT_v1g80394_predicted.pdf › pairlogos/NEMVEDRAFT_v1g80394_predicted.pdf]

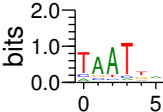

WebLogo 3.7.1

Supplement: SUPPLEMENTAL_Matl.zip [file NEMVEDRAFT_v1g81309_cisbp.pdf › pairlogos/NEMVEDRAFT_v1g81309_cisbp.pdf]

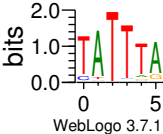

Supplement: SUPPLEMENTAL_Matl.zip [file NEMVEDRAFT_v1g81309_predicted.pdf › pairlogos/NEMVEDRAFT_v1g81309_predicted.pdf]

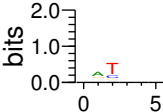

WebLogo 3.7.1

Supplement: SUPPLEMENTAL_Matl.zip [file NEMVEDRAFT_v1g81436_cisbp.pdf › pairlogos/NEMVEDRAFT_v1g81436_cisbp.pdf]

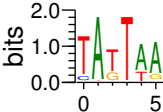

WebLogo 3.7.1

Supplement: SUPPLEMENTAL_Matl.zip [file NEMVEDRAFT_v1g81436_predicted.pdf › pairlogos/NEMVEDRAFT_v1g81436_predicted.pdf]

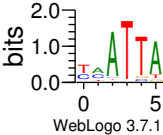

Supplement: SUPPLEMENTAL_Matl.zip [file NEMVEDRAFT_v1g8907_cisbp.pdf › pairlogos/NEMVEDRAFT_v1g8907_cisbp.pdf]

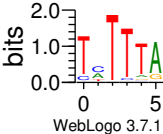

Supplement: SUPPLEMENTAL_Matl.zip [file NEMVEDRAFT_v1g8907_predicted.pdf › pairlogos/NEMVEDRAFT_v1g8907_predicted.pdf]

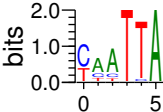

WebLogo 3.7.1

Supplement: SUPPLEMENTAL_Matl.zip [file NK7.1_cisbp.pdf › pairlogos/NK7.1_cisbp.pdf]

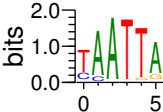

WebLogo 3.7.1

Supplement: SUPPLEMENTAL_Matl.zip [file NK7.1_predicted.pdf › pairlogos/NK7.1_predicted.pdf]

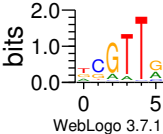

Supplement: SUPPLEMENTAL_Matl.zip [file NKX2-3_cisbp.pdf › pairlogos/NKX2-3_cisbp.pdf]

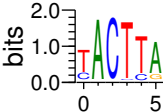

WebLogo 3.7.1

Supplement: SUPPLEMENTAL_Matl.zip [file NKX2-3_predicted.pdf › pairlogos/NKX2-3_predicted.pdf]

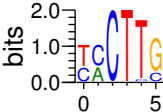

Supplement: SUPPLEMENTAL_Matl.zip [file NKX2-8_cisbp.pdf › pairlogos/NKX2-8_cisbp.pdf]

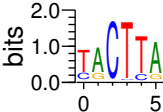

WebLogo 3.7.1

Supplement: SUPPLEMENTAL_Matl.zip [file NKX2-8_predicted.pdf › pairlogos/NKX2-8_predicted.pdf]

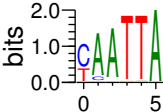

Supplement: SUPPLEMENTAL_Matl.zip [file NOBOX_cisbp.pdf › pairlogos/NOBOX_cisbp.pdf]

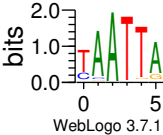

Supplement: SUPPLEMENTAL_Matl.zip [file NOBOX_predicted.pdf › pairlogos/NOBOX_predicted.pdf]

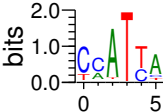

WebLogo 3.7.1

Supplement: SUPPLEMENTAL_Matl.zip [file Nanog_cisbp.pdf › pairlogos/Nanog_cisbp.pdf]

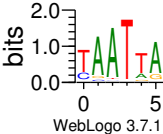

Supplement: SUPPLEMENTAL_Matl.zip [file Nanog_predicted.pdf › pairlogos/Nanog_predicted.pdf]

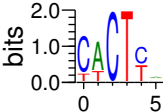

WebLogo 3.7.1

Supplement: SUPPLEMENTAL_Matl.zip [file Nkx2-1_cisbp.pdf › pairlogos/Nkx2-1_cisbp.pdf]

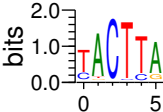

WebLogo 3.7.1

Supplement: SUPPLEMENTAL_Matl.zip [file Nkx2-1_predicted.pdf › pairlogos/Nkx2-1_predicted.pdf]

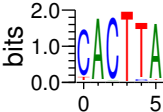

WebLogo 3.7.1

Supplement: SUPPLEMENTAL_Matl.zip [file Nkx3-2_cisbp.pdf › pairlogos/Nkx3-2_cisbp.pdf]

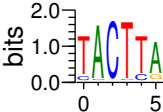

WebLogo 3.7.1

Supplement: SUPPLEMENTAL_Matl.zip [file Nkx3-2_predicted.pdf › pairlogos/Nkx3-2_predicted.pdf]

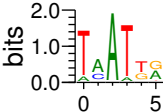

WebLogo 3.7.1

Supplement: SUPPLEMENTAL_Matl.zip [file Noto_cisbp.pdf › pairlogos/Noto_cisbp.pdf]

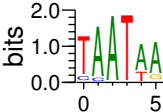

WebLogo 3.7.1

Supplement: SUPPLEMENTAL_Matl.zip [file Noto_predicted.pdf › pairlogos/Noto_predicted.pdf]

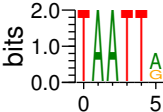

WebLogo 3.7.1

Supplement: SUPPLEMENTAL_Matl.zip [file OdsH_cisbp.pdf › pairlogos/OdsH_cisbp.pdf]

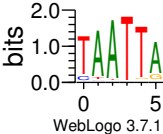

Supplement: SUPPLEMENTAL_Matl.zip [file OdsH_predicted.pdf › pairlogos/OdsH_predicted.pdf]

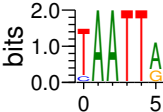

WebLogo 3.7.1

Supplement: SUPPLEMENTAL_Matl.zip [file P79681_ACIBE_cisbp.pdf › pairlogos/P79681_ACIBE_cisbp.pdf]

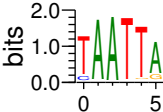

WebLogo 3.7.1

Supplement: SUPPLEMENTAL_Matl.zip [file P79681_ACIBE_predicted.pdf › pairlogos/P79681_ACIBE_predicted.pdf]

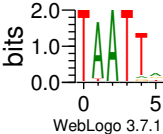

Supplement: SUPPLEMENTAL_Matl.zip [file PHDP_cisbp.pdf › pairlogos/PHDP_cisbp.pdf]

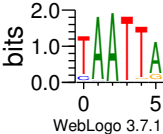

Supplement: SUPPLEMENTAL_Matl.zip [file PHDP_predicted.pdf › pairlogos/PHDP_predicted.pdf]

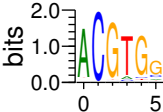

WebLogo 3.7.1

Supplement: SUPPLEMENTAL_Matl.zip [file PHO2_cisbp.pdf › pairlogos/PHO2_cisbp.pdf]

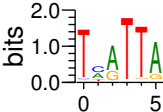

Supplement: SUPPLEMENTAL_Matl.zip [file PHO2_predicted.pdf › pairlogos/PHO2_predicted.pdf]

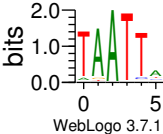

Supplement: SUPPLEMENTAL_Matl.zip [file PHOX2B_cisbp.pdf › pairlogos/PHOX2B_cisbp.pdf]



Supplement: SUPPLEMENTAL_Matl.zip [file PHOX2B_predicted.pdf › pairlogos/PHOX2B_predicted.pdf]

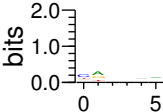

WebLogo 3.7.1

Supplement: SUPPLEMENTAL_Matl.zip [file PK24181.1_cisbp.pdf › pairlogos/PK24181.1_cisbp.pdf]

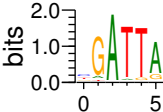

WebLogo 3.7.1

Supplement: SUPPLEMENTAL_Matl.zip [file PK24181.1_predicted.pdf › pairlogos/PK24181.1_predicted.pdf]

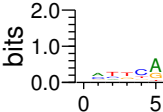

WebLogo 3.7.1

Supplement: SUPPLEMENTAL_Matl.zip [file PK25011.1_cisbp.pdf › pairlogos/PK25011.1_cisbp.pdf]

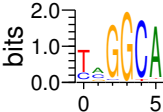

WebLogo 3.7.1

Supplement: SUPPLEMENTAL_Matl.zip [file PK25011.1_predicted.pdf › pairlogos/PK25011.1_predicted.pdf]

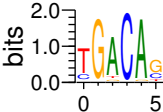

WebLogo 3.7.1

Supplement: SUPPLEMENTAL_Matl.zip [file PKNOX2_cisbp.pdf › pairlogos/PKNOX2_cisbp.pdf]

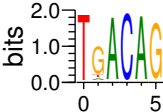

WebLogo 3.7.1

Supplement: SUPPLEMENTAL_Matl.zip [file PKNOX2_predicted.pdf › pairlogos/PKNOX2_predicted.pdf]

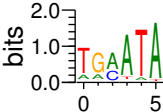

WebLogo 3.7.1

Supplement: SUPPLEMENTAL_Matl.zip [file POU5F1B_cisbp.pdf › pairlogos/POU5F1B_cisbp.pdf]

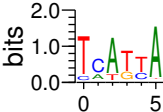

WebLogo 3.7.1

Supplement: SUPPLEMENTAL_Matl.zip [file POU5F1B_predicted.pdf › pairlogos/POU5F1B_predicted.pdf]

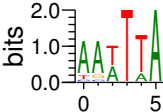

WebLogo 3.7.1

Supplement: SUPPLEMENTAL_Matl.zip [file POU6F1_cisbp.pdf › pairlogos/POU6F1_cisbp.pdf]

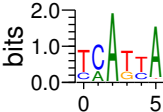

Supplement: SUPPLEMENTAL_Matl.zip [file POU6F1_predicted.pdf › pairlogos/POU6F1_predicted.pdf]

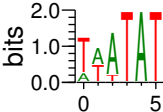

WebLogo 3.7.1

Supplement: SUPPLEMENTAL_Matl.zip [file PRH_PETCR_cisbp.pdf › pairlogos/PRH_PETCR_cisbp.pdf]

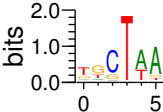

WebLogo 3.7.1

Supplement: SUPPLEMENTAL_Matl.zip [file PRH_PETCR_predicted.pdf › pairlogos/PRH_PETCR_predicted.pdf]
