# Supplementary figures and images for: Learning probabilistic protein–DNA recognition codes from DNA-binding specificities using structural mappings (part 6 of 25)
Source: HighWire-hosted journal article supplement (doi:10.1101/gr.276606.122), 2022-09-01

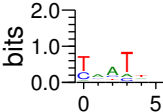

WebLogo 3.6.0

Supplement: SUPPLEMENTAL_Matl.zip [file LMX1B_KRPRVQNAK.pdf › SUPPLEMENTAL_Matl/rCLAMPS/STAMP/alignedLogos_NoyesGrps/logos_1/LMX1B_KRPRVQNAK.pdf]

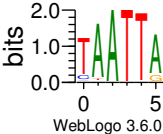

Supplement: SUPPLEMENTAL_Matl.zip [file LMX1B_KRPRVQNAK_330.pdf › SUPPLEMENTAL_Matl/rCLAMPS/STAMP/alignedLogos_NoyesGrps/logos_1/LMX1B_KRPRVQNAK_330.pdf]

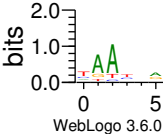

Supplement: SUPPLEMENTAL_Matl.zip [file Lbx2_RKSRTQNAK_331.pdf › SUPPLEMENTAL_Matl/rCLAMPS/STAMP/alignedLogos_NoyesGrps/logos_1/Lbx2_RKSRTQNAK_331.pdf]

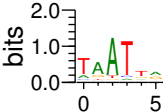

WebLogo 3.6.0

Supplement: SUPPLEMENTAL_Matl.zip [file Lhx1_RGPRVQNSK_332.pdf › SUPPLEMENTAL_Matl/rCLAMPS/STAMP/alignedLogos_NoyesGrps/logos_1/Lhx1_RGPRVQNSK_332.pdf]

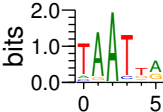

WebLogo 3.6.0

Supplement: SUPPLEMENTAL_Matl.zip [file Lhx2_KRMRVQNAK_333.pdf › SUPPLEMENTAL_Matl/rCLAMPS/STAMP/alignedLogos_NoyesGrps/logos_1/Lhx2_KRMRVQNAK_333.pdf]

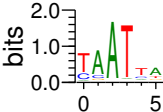

WebLogo 3.6.0

Supplement: SUPPLEMENTAL_Matl.zip [file Lhx3_KRPRVQNAK.pdf › SUPPLEMENTAL_Matl/rCLAMPS/STAMP/alignedLogos_NoyesGrps/logos_1/Lhx3_KRPRVQNAK.pdf]

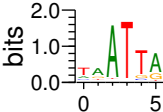

WebLogo 3.6.0

Supplement: SUPPLEMENTAL_Matl.zip [file Lhx3_KRPRVQNAK_334.pdf › SUPPLEMENTAL_Matl/rCLAMPS/STAMP/alignedLogos_NoyesGrps/logos_1/Lhx3_KRPRVQNAK_334.pdf]

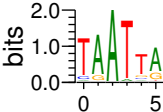

WebLogo 3.6.0

Supplement: SUPPLEMENTAL_Matl.zip [file Lhx4_KRPRVQNAK_335.pdf › SUPPLEMENTAL_Matl/rCLAMPS/STAMP/alignedLogos_NoyesGrps/logos_1/Lhx4_KRPRVQNAK_335.pdf]

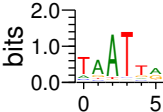

WebLogo 3.6.0

Supplement: SUPPLEMENTAL_Matl.zip [file Lhx5_RGPRVQNSK.pdf › SUPPLEMENTAL_Matl/rCLAMPS/STAMP/alignedLogos_NoyesGrps/logos_1/Lhx5_RGPRVQNSK.pdf]



Supplement: SUPPLEMENTAL_Matl.zip [file Lhx5_RGPRVQNSK_336.pdf › SUPPLEMENTAL_Matl/rCLAMPS/STAMP/alignedLogos_NoyesGrps/logos_1/Lhx5_RGPRVQNSK_336.pdf]

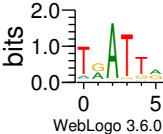

Supplement: SUPPLEMENTAL_Matl.zip [file Lhx6_CONSTRUCT_KRARVQNAR.pdf › SUPPLEMENTAL_Matl/rCLAMPS/STAMP/alignedLogos_NoyesGrps/logos_1/Lhx6_CONSTRUCT_KRARVQNAR.pdf]



Supplement: SUPPLEMENTAL_Matl.zip [file Lhx6_CONSTRUCT_KRARVQNAR_338.pdf › SUPPLEMENTAL_Matl/rCLAMPS/STAMP/alignedLogos_NoyesGrps/logos_1/Lhx6_CONSTRUCT_KRARVQNAR_338.pdf]

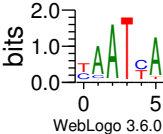

Supplement: SUPPLEMENTAL_Matl.zip [file Lhx6_KRARVQNAR_337.pdf › SUPPLEMENTAL_Matl/rCLAMPS/STAMP/alignedLogos_NoyesGrps/logos_1/Lhx6_KRARVQNAR_337.pdf]

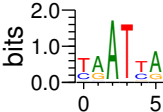

WebLogo 3.6.0

Supplement: SUPPLEMENTAL_Matl.zip [file Lhx8_KRARVQNAR.pdf › SUPPLEMENTAL_Matl/rCLAMPS/STAMP/alignedLogos_NoyesGrps/logos_1/Lhx8_KRARVQNAR.pdf]

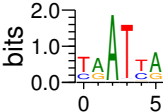

WebLogo 3.6.0

Supplement: SUPPLEMENTAL_Matl.zip [file Lhx8_KRARVQNAR_339.pdf › SUPPLEMENTAL_Matl/rCLAMPS/STAMP/alignedLogos_NoyesGrps/logos_1/Lhx8_KRARVQNAR_339.pdf]

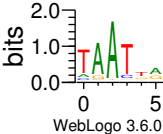

Supplement: SUPPLEMENTAL_Matl.zip [file Lhx9_KRMRVQNAK_340.pdf › SUPPLEMENTAL_Matl/rCLAMPS/STAMP/alignedLogos_NoyesGrps/logos_1/Lhx9_KRMRVQNAK_340.pdf]

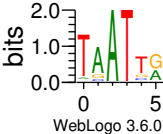

Supplement: SUPPLEMENTAL_Matl.zip [file Lim1_RGPRVQNSK.pdf › SUPPLEMENTAL_Matl/rCLAMPS/STAMP/alignedLogos_NoyesGrps/logos_1/Lim1_RGPRVQNSK.pdf]



Supplement: SUPPLEMENTAL_Matl.zip [file Lim1_RGPRVQNSK_341.pdf › SUPPLEMENTAL_Matl/rCLAMPS/STAMP/alignedLogos_NoyesGrps/logos_1/Lim1_RGPRVQNSK_341.pdf]

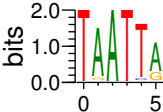

WebLogo 3.6.0

Supplement: SUPPLEMENTAL_Matl.zip [file Lim3_KRPRVQNAK.pdf › SUPPLEMENTAL_Matl/rCLAMPS/STAMP/alignedLogos_NoyesGrps/logos_1/Lim3_KRPRVQNAK.pdf]



WebLogo 3.6.0

Supplement: SUPPLEMENTAL_Matl.zip [file Lim3_KRPRVQNAK_342.pdf › SUPPLEMENTAL_Matl/rCLAMPS/STAMP/alignedLogos_NoyesGrps/logos_1/Lim3_KRPRVQNAK_342.pdf]

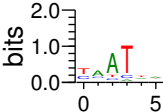

WebLogo 3.6.0

Supplement: SUPPLEMENTAL_Matl.zip [file Lmx1a_KRPRVQNAK_343.pdf › SUPPLEMENTAL_Matl/rCLAMPS/STAMP/alignedLogos_NoyesGrps/logos_1/Lmx1a_KRPRVQNAK_343.pdf]



WebLogo 3.6.0

Supplement: SUPPLEMENTAL_Matl.zip [file Lmx1b_KRPRVQNAK_344.pdf › SUPPLEMENTAL_Matl/rCLAMPS/STAMP/alignedLogos_NoyesGrps/logos_1/Lmx1b_KRPRVQNAK_344.pdf]

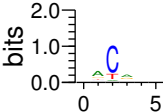

WebLogo 3.6.0

Supplement: SUPPLEMENTAL_Matl.zip [file MATALPHA2_PYRGNSNRK_345.pdf › SUPPLEMENTAL_Matl/rCLAMPS/STAMP/alignedLogos_NoyesGrps/logos_1/MATALPHA2_PYRGNSNRK_345.pdf]

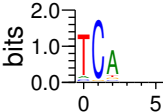

WebLogo 3.6.0

Supplement: SUPPLEMENTAL_Matl.zip [file MEIS1_HKKRNINRR.pdf › SUPPLEMENTAL_Matl/rCLAMPS/STAMP/alignedLogos_NoyesGrps/logos_1/MEIS1_HKKRNINRR.pdf]

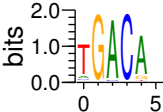

WebLogo 3.6.0

Supplement: SUPPLEMENTAL_Matl.zip [file MEIS1_HKKRNINRR_346.pdf › SUPPLEMENTAL_Matl/rCLAMPS/STAMP/alignedLogos_NoyesGrps/logos_1/MEIS1_HKKRNINRR_346.pdf]

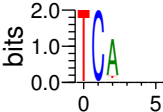

Supplement: SUPPLEMENTAL_Matl.zip [file MEIS2_QKKRNINRR.pdf › SUPPLEMENTAL_Matl/rCLAMPS/STAMP/alignedLogos_NoyesGrps/logos_1/MEIS2_QKKRNINRR.pdf]

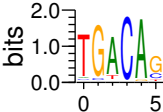

WebLogo 3.6.0

Supplement: SUPPLEMENTAL_Matl.zip [file MEIS2_QKKRNINRR_347.pdf › SUPPLEMENTAL_Matl/rCLAMPS/STAMP/alignedLogos_NoyesGrps/logos_1/MEIS2_QKKRNINRR_347.pdf]

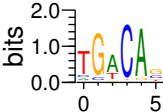

# WebLogo 3.6.0

Supplement: SUPPLEMENTAL_Matl.zip [file MEIS3_NKKRNINRR_348.pdf › SUPPLEMENTAL_Matl/rCLAMPS/STAMP/alignedLogos_NoyesGrps/logos_1/MEIS3_NKKRNINRR_348.pdf]

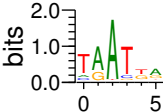

WebLogo 3.6.0

Supplement: SUPPLEMENTAL_Matl.zip [file MEOX1_RKERVQNMK.pdf › SUPPLEMENTAL_Matl/rCLAMPS/STAMP/alignedLogos_NoyesGrps/logos_1/MEOX1_RKERVQNMK.pdf]

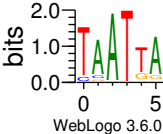

Supplement: SUPPLEMENTAL_Matl.zip [file MEOX1_RKERVQNMK_349.pdf › SUPPLEMENTAL_Matl/rCLAMPS/STAMP/alignedLogos_NoyesGrps/logos_1/MEOX1_RKERVQNMK_349.pdf]

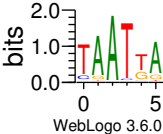

Supplement: SUPPLEMENTAL_Matl.zip [file MEOX2_RKERVQNMK.pdf › SUPPLEMENTAL_Matl/rCLAMPS/STAMP/alignedLogos_NoyesGrps/logos_1/MEOX2_RKERVQNMK.pdf]

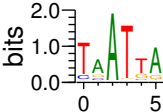

WebLogo 3.6.0

Supplement: SUPPLEMENTAL_Matl.zip [file MEOX2_RKERVQNMK_350.pdf › SUPPLEMENTAL_Matl/rCLAMPS/STAMP/alignedLogos_NoyesGrps/logos_1/MEOX2_RKERVQNMK_350.pdf]

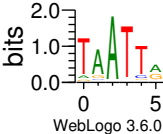

Supplement: SUPPLEMENTAL_Matl.zip [file MIXL1_RRKRVQNAK.pdf › SUPPLEMENTAL_Matl/rCLAMPS/STAMP/alignedLogos_NoyesGrps/logos_1/MIXL1_RRKRVQNAK.pdf]



Supplement: SUPPLEMENTAL_Matl.zip [file MIXL1_RRKRVQNAK_351.pdf › SUPPLEMENTAL_Matl/rCLAMPS/STAMP/alignedLogos_NoyesGrps/logos_1/MIXL1_RRKRVQNAK_351.pdf]

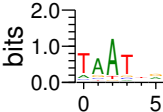

WebLogo 3.6.0

Supplement: SUPPLEMENTAL_Matl.zip [file MNX1_RRPRIQNMK.pdf › SUPPLEMENTAL_Matl/rCLAMPS/STAMP/alignedLogos_NoyesGrps/logos_1/MNX1_RRPRIQNMK.pdf]

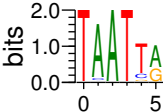

WebLogo 3.6.0

Supplement: SUPPLEMENTAL_Matl.zip [file MNX1_RRPRIQNMK_352.pdf › SUPPLEMENTAL_Matl/rCLAMPS/STAMP/alignedLogos_NoyesGrps/logos_1/MNX1_RRPRIQNMK_352.pdf]

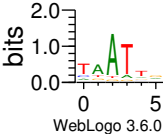

Supplement: SUPPLEMENTAL_Matl.zip [file MSX1_RKPRIQNAK.pdf › SUPPLEMENTAL_Matl/rCLAMPS/STAMP/alignedLogos_NoyesGrps/logos_1/MSX1_RKPRIQNAK.pdf]

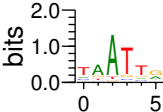

WebLogo 3.6.0

Supplement: SUPPLEMENTAL_Matl.zip [file MSX2_RKPRIQNAK.pdf › SUPPLEMENTAL_Matl/rCLAMPS/STAMP/alignedLogos_NoyesGrps/logos_1/MSX2_RKPRIQNAK.pdf]

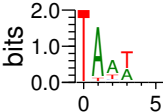

WebLogo 3.6.0

Supplement: SUPPLEMENTAL_Matl.zip [file MTAL2_KLUDE_PYRGNSNRK_353.pdf › SUPPLEMENTAL_Matl/rCLAMPS/STAMP/alignedLogos_NoyesGrps/logos_1/MTAL2_KLUDE_PYRGNSNRK_353.pdf]

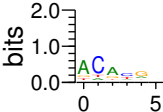

WebLogo 3.6.0

Supplement: SUPPLEMENTAL_Matl.zip [file MTAL2_PICAN_EKRSNSNRK_354.pdf › SUPPLEMENTAL_Matl/rCLAMPS/STAMP/alignedLogos_NoyesGrps/logos_1/MTAL2_PICAN_EKRSNSNRK_354.pdf]

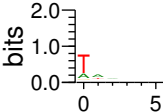

Supplement: SUPPLEMENTAL_Matl.zip [file MTR_2g038000_KRPCKKNYM.pdf › SUPPLEMENTAL_Matl/rCLAMPS/STAMP/alignedLogos_NoyesGrps/logos_1/MTR_2g038000_KRPCKKNYM.pdf]



Supplement: SUPPLEMENTAL_Matl.zip [file MTR_2g038000_KRPCKKNYM_355.pdf › SUPPLEMENTAL_Matl/rCLAMPS/STAMP/alignedLogos_NoyesGrps/logos_1/MTR_2g038000_KRPCKKNYM_355.pdf]

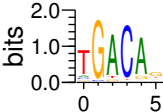

WebLogo 3.6.0

Supplement: SUPPLEMENTAL_Matl.zip [file Meis1_HKKRNINRR_356.pdf › SUPPLEMENTAL_Matl/rCLAMPS/STAMP/alignedLogos_NoyesGrps/logos_1/Meis1_HKKRNINRR_356.pdf]

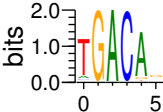

WebLogo 3.6.0

Supplement: SUPPLEMENTAL_Matl.zip [file Meis2_QKKRNINRR_357.pdf › SUPPLEMENTAL_Matl/rCLAMPS/STAMP/alignedLogos_NoyesGrps/logos_1/Meis2_QKKRNINRR_357.pdf]

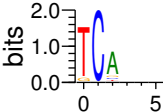

Supplement: SUPPLEMENTAL_Matl.zip [file Meis3_NKKRNINRR.pdf › SUPPLEMENTAL_Matl/rCLAMPS/STAMP/alignedLogos_NoyesGrps/logos_1/Meis3_NKKRNINRR.pdf]

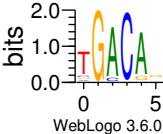

Supplement: SUPPLEMENTAL_Matl.zip [file Meis3_NKKRNINRR_358.pdf › SUPPLEMENTAL_Matl/rCLAMPS/STAMP/alignedLogos_NoyesGrps/logos_1/Meis3_NKKRNINRR_358.pdf]



WebLogo 3.6.0

Supplement: SUPPLEMENTAL_Matl.zip [file Meox1_RKERVQNMK_359.pdf › SUPPLEMENTAL_Matl/rCLAMPS/STAMP/alignedLogos_NoyesGrps/logos_1/Meox1_RKERVQNMK_359.pdf]



Supplement: SUPPLEMENTAL_Matl.zip [file Meox2_RKERVQNMK_360.pdf › SUPPLEMENTAL_Matl/rCLAMPS/STAMP/alignedLogos_NoyesGrps/logos_1/Meox2_RKERVQNMK_360.pdf]



WebLogo 3.6.0

Supplement: SUPPLEMENTAL_Matl.zip [file Mnx1_RRPRIQNMK_361.pdf › SUPPLEMENTAL_Matl/rCLAMPS/STAMP/alignedLogos_NoyesGrps/logos_1/Mnx1_RRPRIQNMK_361.pdf]

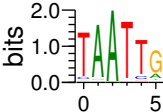

WebLogo 3.6.0

Supplement: SUPPLEMENTAL_Matl.zip [file Msx3_RKPRIQNAK.pdf › SUPPLEMENTAL_Matl/rCLAMPS/STAMP/alignedLogos_NoyesGrps/logos_1/Msx3_RKPRIQNAK.pdf]

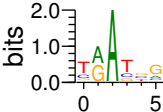

WebLogo 3.6.0

Supplement: SUPPLEMENTAL_Matl.zip [file NANOG_QKTRTQNMK.pdf › SUPPLEMENTAL_Matl/rCLAMPS/STAMP/alignedLogos_NoyesGrps/logos_1/NANOG_QKTRTQNMK.pdf]



WebLogo 3.6.0

Supplement: SUPPLEMENTAL_Matl.zip [file NANOG_QKTRTQNMK_362.pdf › SUPPLEMENTAL_Matl/rCLAMPS/STAMP/alignedLogos_NoyesGrps/logos_1/NANOG_QKTRTQNMK_362.pdf]

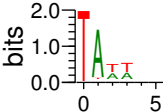

WebLogo 3.6.0

Supplement: SUPPLEMENTAL_Matl.zip [file NCU03070_TEPKNQNAK_363.pdf › SUPPLEMENTAL_Matl/rCLAMPS/STAMP/alignedLogos_NoyesGrps/logos_1/NCU03070_TEPKNQNAK_363.pdf]

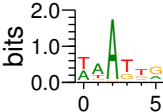

WebLogo 3.6.0

Supplement: SUPPLEMENTAL_Matl.zip [file NCU03266_KGKRIQNQN.pdf › SUPPLEMENTAL_Matl/rCLAMPS/STAMP/alignedLogos_NoyesGrps/logos_1/NCU03266_KGKRIQNQN.pdf]



WebLogo 3.6.0

Supplement: SUPPLEMENTAL_Matl.zip [file NCU03266_KGKRIQNQN_364.pdf › SUPPLEMENTAL_Matl/rCLAMPS/STAMP/alignedLogos_NoyesGrps/logos_1/NCU03266_KGKRIQNQN_364.pdf]

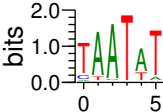

WebLogo 3.6.0

Supplement: SUPPLEMENTAL_Matl.zip [file NCU09556_KMKRVQNAK.pdf › SUPPLEMENTAL_Matl/rCLAMPS/STAMP/alignedLogos_NoyesGrps/logos_1/NCU09556_KMKRVQNAK.pdf]

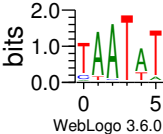

Supplement: SUPPLEMENTAL_Matl.zip [file NCU09556_KMKRVQNAK_365.pdf › SUPPLEMENTAL_Matl/rCLAMPS/STAMP/alignedLogos_NoyesGrps/logos_1/NCU09556_KMKRVQNAK_365.pdf]

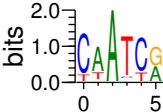

WebLogo 3.6.0

Supplement: SUPPLEMENTAL_Matl.zip [file NEMVEDRAFT_v1g101664_QKQRTQNTR.pdf › SUPPLEMENTAL_Matl/rCLAMPS/STAMP/alignedLogos_NoyesGrps/logos_1/NEMVEDRAFT_v1g101664_QKQRTQNTR.pdf]



WebLogo 3.6.0

Supplement: SUPPLEMENTAL_Matl.zip [file NEMVEDRAFT_v1g101664_QKQRTQNTR_366.pdf › SUPPLEMENTAL_Matl/rCLAMPS/STAMP/alignedLogos_NoyesGrps/logos_1/NEMVEDRAFT_v1g101664_QKQRTQNTR_366.pdf]

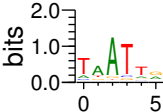

WebLogo 3.6.0

Supplement: SUPPLEMENTAL_Matl.zip [file NEMVEDRAFT_v1g105595_PRNRIQNAK.pdf › SUPPLEMENTAL_Matl/rCLAMPS/STAMP/alignedLogos_NoyesGrps/logos_1/NEMVEDRAFT_v1g105595_PRNRIQNAK.pdf]



WebLogo 3.6.0

Supplement: SUPPLEMENTAL_Matl.zip [file NEMVEDRAFT_v1g105595_PRNRIQNAK_367.pdf › SUPPLEMENTAL_Matl/rCLAMPS/STAMP/alignedLogos_NoyesGrps/logos_1/NEMVEDRAFT_v1g105595_PRNRIQNAK_367.pdf]

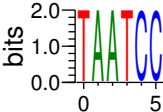

WebLogo 3.6.0

Supplement: SUPPLEMENTAL_Matl.zip [file NEMVEDRAFT_v1g113057_RRVRIKNAK.pdf › SUPPLEMENTAL_Matl/rCLAMPS/STAMP/alignedLogos_NoyesGrps/logos_1/NEMVEDRAFT_v1g113057_RRVRIKNAK.pdf]



WebLogo 3.6.0

Supplement: SUPPLEMENTAL_Matl.zip [file NEMVEDRAFT_v1g113057_RRVRIKNAK_368.pdf › SUPPLEMENTAL_Matl/rCLAMPS/STAMP/alignedLogos_NoyesGrps/logos_1/NEMVEDRAFT_v1g113057_RRVRIKNAK_368.pdf]

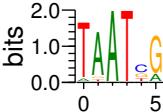

WebLogo 3.6.0

Supplement: SUPPLEMENTAL_Matl.zip [file NEMVEDRAFT_v1g114268_KPRRNQNMK.pdf › SUPPLEMENTAL_Matl/rCLAMPS/STAMP/alignedLogos_NoyesGrps/logos_1/NEMVEDRAFT_v1g114268_KPRRNQNMK.pdf]



WebLogo 3.6.0

Supplement: SUPPLEMENTAL_Matl.zip [file NEMVEDRAFT_v1g114268_KPRRNQNMK_369.pdf › SUPPLEMENTAL_Matl/rCLAMPS/STAMP/alignedLogos_NoyesGrps/logos_1/NEMVEDRAFT_v1g114268_KPRRNQNMK_369.pdf]

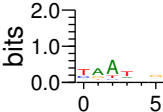

WebLogo 3.6.0

Supplement: SUPPLEMENTAL_Matl.zip [file NEMVEDRAFT_v1g129868_PKLRTQNTK.pdf › SUPPLEMENTAL_Matl/rCLAMPS/STAMP/alignedLogos_NoyesGrps/logos_1/NEMVEDRAFT_v1g129868_PKLRTQNTK.pdf]



WebLogo 3.6.0

Supplement: SUPPLEMENTAL_Matl.zip [file NEMVEDRAFT_v1g129868_PKLRTQNTK_370.pdf › SUPPLEMENTAL_Matl/rCLAMPS/STAMP/alignedLogos_NoyesGrps/logos_1/NEMVEDRAFT_v1g129868_PKLRTQNTK_370.pdf]

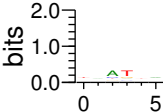

WebLogo 3.6.0

Supplement: SUPPLEMENTAL_Matl.zip [file NEMVEDRAFT_v1g136480_RRNRVSNSK.pdf › SUPPLEMENTAL_Matl/rCLAMPS/STAMP/alignedLogos_NoyesGrps/logos_1/NEMVEDRAFT_v1g136480_RRNRVSNSK.pdf]



WebLogo 3.6.0

Supplement: SUPPLEMENTAL_Matl.zip [file NEMVEDRAFT_v1g136480_RRNRVSNSK_371.pdf › SUPPLEMENTAL_Matl/rCLAMPS/STAMP/alignedLogos_NoyesGrps/logos_1/NEMVEDRAFT_v1g136480_RRNRVSNSK_371.pdf]

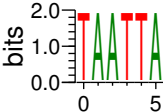

WebLogo 3.6.0

Supplement: SUPPLEMENTAL_Matl.zip [file NEMVEDRAFT_v1g164989_RKPRTQNAK.pdf › SUPPLEMENTAL_Matl/rCLAMPS/STAMP/alignedLogos_NoyesGrps/logos_1/NEMVEDRAFT_v1g164989_RKPRTQNAK.pdf]



WebLogo 3.6.0

Supplement: SUPPLEMENTAL_Matl.zip [file NEMVEDRAFT_v1g164989_RKPRTQNAK_372.pdf › SUPPLEMENTAL_Matl/rCLAMPS/STAMP/alignedLogos_NoyesGrps/logos_1/NEMVEDRAFT_v1g164989_RKPRTQNAK_372.pdf]

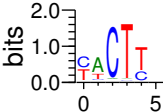

WebLogo 3.6.0

Supplement: SUPPLEMENTAL_Matl.zip [file NEMVEDRAFT_v1g197288_TYRRTQNYK_373.pdf › SUPPLEMENTAL_Matl/rCLAMPS/STAMP/alignedLogos_NoyesGrps/logos_1/NEMVEDRAFT_v1g197288_TYRRTQNYK_373.pdf]

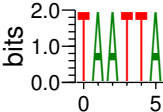

WebLogo 3.6.0

Supplement: SUPPLEMENTAL_Matl.zip [file NEMVEDRAFT_v1g205636_KRYRVQNIK.pdf › SUPPLEMENTAL_Matl/rCLAMPS/STAMP/alignedLogos_NoyesGrps/logos_1/NEMVEDRAFT_v1g205636_KRYRVQNIK.pdf]



WebLogo 3.6.0

Supplement: SUPPLEMENTAL_Matl.zip [file NEMVEDRAFT_v1g205636_KRYRVQNMK_374.pdf › SUPPLEMENTAL_Matl/rCLAMPS/STAMP/alignedLogos_NoyesGrps/logos_1/NEMVEDRAFT_v1g205636_KRYRVQNMK_374.pdf]

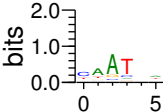

Supplement: SUPPLEMENTAL_Matl.zip [file NEMVEDRAFT_v1g80394_RNPRIQNAR.pdf › SUPPLEMENTAL_Matl/rCLAMPS/STAMP/alignedLogos_NoyesGrps/logos_1/NEMVEDRAFT_v1g80394_RNPRIQNAR.pdf]



Supplement: SUPPLEMENTAL_Matl.zip [file NEMVEDRAFT_v1g80394_RNPRIQNAR_375.pdf › SUPPLEMENTAL_Matl/rCLAMPS/STAMP/alignedLogos_NoyesGrps/logos_1/NEMVEDRAFT_v1g80394_RNPRIQNAR_375.pdf]

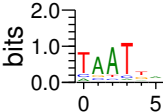

WebLogo 3.6.0

Supplement: SUPPLEMENTAL_Matl.zip [file NEMVEDRAFT_v1g81309_RRGRVQNIK.pdf › SUPPLEMENTAL_Matl/rCLAMPS/STAMP/alignedLogos_NoyesGrps/logos_1/NEMVEDRAFT_v1g81309_RRGRVQNIK.pdf]



WebLogo 3.6.0

Supplement: SUPPLEMENTAL_Matl.zip [file NEMVEDRAFT_v1g81309_RRGRVQNIK_376.pdf › SUPPLEMENTAL_Matl/rCLAMPS/STAMP/alignedLogos_NoyesGrps/logos_1/NEMVEDRAFT_v1g81309_RRGRVQNIK_376.pdf]

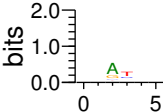

Supplement: SUPPLEMENTAL_Matl.zip [file NEMVEDRAFT_v1g81436_PRPRIQNVK.pdf › SUPPLEMENTAL_Matl/rCLAMPS/STAMP/alignedLogos_NoyesGrps/logos_1/NEMVEDRAFT_v1g81436_PRPRIQNVK.pdf]



WebLogo 3.6.0

Supplement: SUPPLEMENTAL_Matl.zip [file NEMVEDRAFT_v1g81436_PRPRIQNVK_377.pdf › SUPPLEMENTAL_Matl/rCLAMPS/STAMP/alignedLogos_NoyesGrps/logos_1/NEMVEDRAFT_v1g81436_PRPRIQNVK_377.pdf]

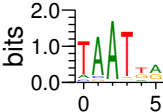

WebLogo 3.6.0

Supplement: SUPPLEMENTAL_Matl.zip [file NEMVEDRAFT_v1g8907_RRKRIQNIK.pdf › SUPPLEMENTAL_Matl/rCLAMPS/STAMP/alignedLogos_NoyesGrps/logos_1/NEMVEDRAFT_v1g8907_RRKRIQNIK.pdf]



WebLogo 3.6.0

Supplement: SUPPLEMENTAL_Matl.zip [file NEMVEDRAFT_v1g8907_RRKRIQNIK_378.pdf › SUPPLEMENTAL_Matl/rCLAMPS/STAMP/alignedLogos_NoyesGrps/logos_1/NEMVEDRAFT_v1g8907_RRKRIQNIK_378.pdf]

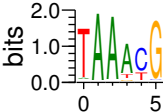

WebLogo 3.6.0

Supplement: SUPPLEMENTAL_Matl.zip [file NK7.1_KKARIQNTK.pdf › SUPPLEMENTAL_Matl/rCLAMPS/STAMP/alignedLogos_NoyesGrps/logos_1/NK7.1_KKARIQNTK.pdf]



WebLogo 3.6.0

Supplement: SUPPLEMENTAL_Matl.zip [file NK7.1_KKARIQNTK_379.pdf › SUPPLEMENTAL_Matl/rCLAMPS/STAMP/alignedLogos_NoyesGrps/logos_1/NK7.1_KKARIQNTK_379.pdf]

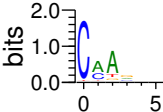

WebLogo 3.6.0

Supplement: SUPPLEMENTAL_Matl.zip [file NKX2-1_RKRRIQNYK_380.pdf › SUPPLEMENTAL_Matl/rCLAMPS/STAMP/alignedLogos_NoyesGrps/logos_1/NKX2-1_RKRRIQNYK_380.pdf]

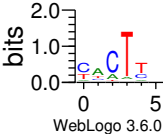

Supplement: SUPPLEMENTAL_Matl.zip [file NKX2-3_RKPRIQNYK.pdf › SUPPLEMENTAL_Matl/rCLAMPS/STAMP/alignedLogos_NoyesGrps/logos_1/NKX2-3_RKPRIQNYK.pdf]

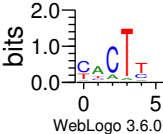

Supplement: SUPPLEMENTAL_Matl.zip [file NKX2-5_RKPRIQNYK.pdf › SUPPLEMENTAL_Matl/rCLAMPS/STAMP/alignedLogos_NoyesGrps/logos_1/NKX2-5_RKPRIQNYK.pdf]

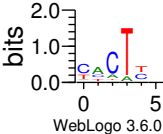

Supplement: SUPPLEMENTAL_Matl.zip [file NKX2-8_KKRRIQNYK.pdf › SUPPLEMENTAL_Matl/rCLAMPS/STAMP/alignedLogos_NoyesGrps/logos_1/NKX2-8_KKRRIQNYK.pdf]

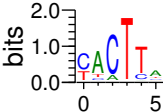

Supplement: SUPPLEMENTAL_Matl.zip [file NKX3-1_KRSRIQNYK.pdf › SUPPLEMENTAL_Matl/rCLAMPS/STAMP/alignedLogos_NoyesGrps/logos_1/NKX3-1_KRSRIQNYK.pdf]

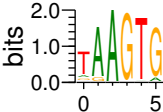

WebLogo 3.6.0

Supplement: SUPPLEMENTAL_Matl.zip [file NKX3-1_KRSRIQNYK_381.pdf › SUPPLEMENTAL_Matl/rCLAMPS/STAMP/alignedLogos_NoyesGrps/logos_1/NKX3-1_KRSRIQNYK_381.pdf]

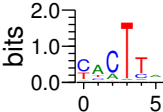

WebLogo 3.6.0

Supplement: SUPPLEMENTAL_Matl.zip [file NKX3-2_KRSRIQNYK.pdf › SUPPLEMENTAL_Matl/rCLAMPS/STAMP/alignedLogos_NoyesGrps/logos_1/NKX3-2_KRSRIQNYK.pdf]

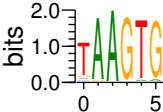

WebLogo 3.6.0

Supplement: SUPPLEMENTAL_Matl.zip [file NKX3-2_KRSRIQNYK_382.pdf › SUPPLEMENTAL_Matl/rCLAMPS/STAMP/alignedLogos_NoyesGrps/logos_1/NKX3-2_KRSRIQNYK_382.pdf]

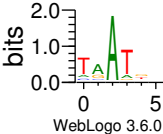

Supplement: SUPPLEMENTAL_Matl.zip [file NKX6-1_KHTRVQNTK_383.pdf › SUPPLEMENTAL_Matl/rCLAMPS/STAMP/alignedLogos_NoyesGrps/logos_1/NKX6-1_KHTRVQNTK_383.pdf]

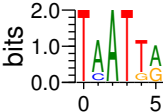

WebLogo 3.6.0

Supplement: SUPPLEMENTAL_Matl.zip [file NKX6-2_KHSRVQNTK.pdf › SUPPLEMENTAL_Matl/rCLAMPS/STAMP/alignedLogos_NoyesGrps/logos_1/NKX6-2_KHSRVQNTK.pdf]



WebLogo 3.6.0

Supplement: SUPPLEMENTAL_Matl.zip [file NKX6-2_KHSRVQNTK_384.pdf › SUPPLEMENTAL_Matl/rCLAMPS/STAMP/alignedLogos_NoyesGrps/logos_1/NKX6-2_KHSRVQNTK_384.pdf]

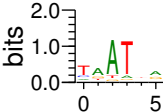

Supplement: SUPPLEMENTAL_Matl.zip [file NKX6-3_KHTRVQNTK.pdf › SUPPLEMENTAL_Matl/rCLAMPS/STAMP/alignedLogos_NoyesGrps/logos_1/NKX6-3_KHTRVQNTK.pdf]

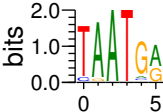

WebLogo 3.6.0

Supplement: SUPPLEMENTAL_Matl.zip [file NKX6-3_KHTRVQNTK_385.pdf › SUPPLEMENTAL_Matl/rCLAMPS/STAMP/alignedLogos_NoyesGrps/logos_1/NKX6-3_KHTRVQNTK_385.pdf]

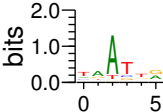

WebLogo 3.6.0

Supplement: SUPPLEMENTAL_Matl.zip [file NOBOX_KKTRVQNAK.pdf › SUPPLEMENTAL_Matl/rCLAMPS/STAMP/alignedLogos_NoyesGrps/logos_1/NOBOX_KKTRVQNAK.pdf]

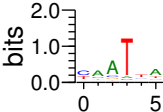

WebLogo 3.6.0

Supplement: SUPPLEMENTAL_Matl.zip [file NOBOX_KKTRVQNAK_386.pdf › SUPPLEMENTAL_Matl/rCLAMPS/STAMP/alignedLogos_NoyesGrps/logos_1/NOBOX_KKTRVQNAK_386.pdf]

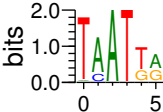

WebLogo 3.6.0

Supplement: SUPPLEMENTAL_Matl.zip [file NOTO_KRVRVQNVK.pdf › SUPPLEMENTAL_Matl/rCLAMPS/STAMP/alignedLogos_NoyesGrps/logos_1/NOTO_KRVRVQNVK.pdf]
