# Supplementary figures and images for: Learning probabilistic protein–DNA recognition codes from DNA-binding specificities using structural mappings (part 13 of 25)
Source: HighWire-hosted journal article supplement (doi:10.1101/gr.276606.122), 2022-09-01

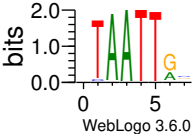

Supplement: SUPPLEMENTAL_Matl.zip [file MSX1_133.pdf › SUPPLEMENTAL_Matl/rCLAMPS/hd1-explore/testSetLogos/MSX1_133.pdf]

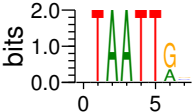

Supplement: SUPPLEMENTAL_Matl.zip [file MSX2_134.pdf › SUPPLEMENTAL_Matl/rCLAMPS/hd1-explore/testSetLogos/MSX2_134.pdf]

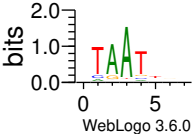

Supplement: SUPPLEMENTAL_Matl.zip [file MSX2_P148H_135.pdf › SUPPLEMENTAL_Matl/rCLAMPS/hd1-explore/testSetLogos/MSX2_P148H_135.pdf]

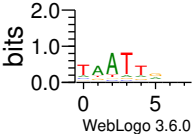

Supplement: SUPPLEMENTAL_Matl.zip [file MSX2_R172H_136.pdf › SUPPLEMENTAL_Matl/rCLAMPS/hd1-explore/testSetLogos/MSX2_R172H_136.pdf]

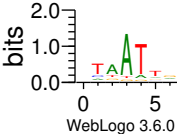

Supplement: SUPPLEMENTAL_Matl.zip [file Msx1_137.pdf › SUPPLEMENTAL_Matl/rCLAMPS/hd1-explore/testSetLogos/Msx1_137.pdf]

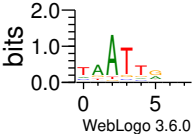

Supplement: SUPPLEMENTAL_Matl.zip [file Msx2_138.pdf › SUPPLEMENTAL_Matl/rCLAMPS/hd1-explore/testSetLogos/Msx2_138.pdf]

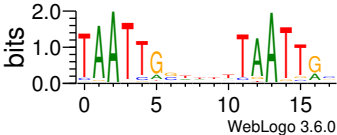

Supplement: SUPPLEMENTAL_Matl.zip [file Msx3_139.pdf › SUPPLEMENTAL_Matl/rCLAMPS/hd1-explore/testSetLogos/Msx3_139.pdf]

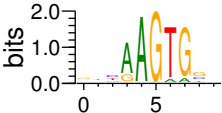

WebLogo 3.6.0

Supplement: SUPPLEMENTAL_Matl.zip [file NKX2-3_140.pdf › SUPPLEMENTAL_Matl/rCLAMPS/hd1-explore/testSetLogos/NKX2-3_140.pdf]

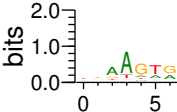

WebLogo 3.6.0

Supplement: SUPPLEMENTAL_Matl.zip [file NKX2-5_141.pdf › SUPPLEMENTAL_Matl/rCLAMPS/hd1-explore/testSetLogos/NKX2-5_141.pdf]

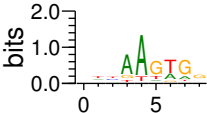

WebLogo 3.6.0

Supplement: SUPPLEMENTAL_Matl.zip [file NKX2-5_K183E_142.pdf › SUPPLEMENTAL_Matl/rCLAMPS/hd1-explore/testSetLogos/NKX2-5_K183E_142.pdf]

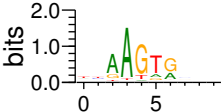

WebLogo 3.6.0

Supplement: SUPPLEMENTAL_Matl.zip [file NKX2-5_R161P_143.pdf › SUPPLEMENTAL_Matl/rCLAMPS/hd1-explore/testSetLogos/NKX2-5_R161P_143.pdf]

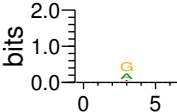

WebLogo 3.6.0

Supplement: SUPPLEMENTAL_Matl.zip [file NKX2-5_R190C_144.pdf › SUPPLEMENTAL_Matl/rCLAMPS/hd1-explore/testSetLogos/NKX2-5_R190C_144.pdf]

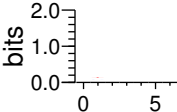

WebLogo 3.6.0

Supplement: SUPPLEMENTAL_Matl.zip [file NKX2-5_T178M_145.pdf › SUPPLEMENTAL_Matl/rCLAMPS/hd1-explore/testSetLogos/NKX2-5_T178M_145.pdf]

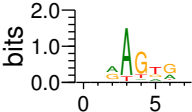

WebLogo 3.6.0

Supplement: SUPPLEMENTAL_Matl.zip [file NKX2-8_146.pdf › SUPPLEMENTAL_Matl/rCLAMPS/hd1-explore/testSetLogos/NKX2-8_146.pdf]

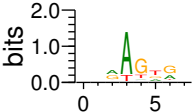

WebLogo 3.6.0

Supplement: SUPPLEMENTAL_Matl.zip [file NKX2-8_A94T_147.pdf › SUPPLEMENTAL_Matl/rCLAMPS/hd1-explore/testSetLogos/NKX2-8_A94T_147.pdf]

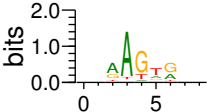

WebLogo 3.6.0

Supplement: SUPPLEMENTAL_Matl.zip [file Nkx2-3_148.pdf › SUPPLEMENTAL_Matl/rCLAMPS/hd1-explore/testSetLogos/Nkx2-3_148.pdf]

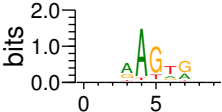

WebLogo 3.6.0

Supplement: SUPPLEMENTAL_Matl.zip [file Nkx2-5_149.pdf › SUPPLEMENTAL_Matl/rCLAMPS/hd1-explore/testSetLogos/Nkx2-5_149.pdf]

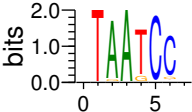

WebLogo 3.6.0

Supplement: SUPPLEMENTAL_Matl.zip [file OTX1_150.pdf › SUPPLEMENTAL_Matl/rCLAMPS/hd1-explore/testSetLogos/OTX1_150.pdf]

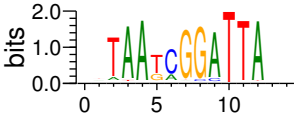

WebLogo 3.6.0

Supplement: SUPPLEMENTAL_Matl.zip [file OTX2_151.pdf › SUPPLEMENTAL_Matl/rCLAMPS/hd1-explore/testSetLogos/OTX2_151.pdf]

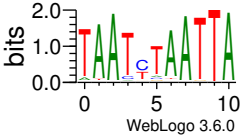

Supplement: SUPPLEMENTAL_Matl.zip [file Optix_152.pdf › SUPPLEMENTAL_Matl/rCLAMPS/hd1-explore/testSetLogos/Optix_152.pdf]

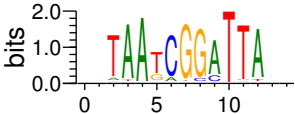

Supplement: SUPPLEMENTAL_Matl.zip [file Otx1_153.pdf › SUPPLEMENTAL_Matl/rCLAMPS/hd1-explore/testSetLogos/Otx1_153.pdf]

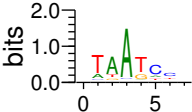

WebLogo 3.6.0

Supplement: SUPPLEMENTAL_Matl.zip [file Otx2_154.pdf › SUPPLEMENTAL_Matl/rCLAMPS/hd1-explore/testSetLogos/Otx2_154.pdf]

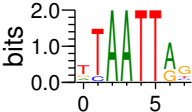

WebLogo 3.6.0

Supplement: SUPPLEMENTAL_Matl.zip [file P79681_ACIBE_155.pdf › SUPPLEMENTAL_Matl/rCLAMPS/hd1-explore/testSetLogos/P79681_ACIBE_155.pdf]

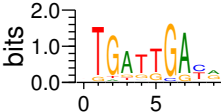

WebLogo 3.6.0

Supplement: SUPPLEMENTAL_Matl.zip [file PBX1_156.pdf › SUPPLEMENTAL_Matl/rCLAMPS/hd1-explore/testSetLogos/PBX1_156.pdf]

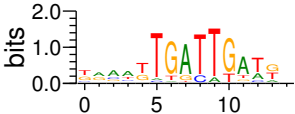

Supplement: SUPPLEMENTAL_Matl.zip [file PBX2_157.pdf › SUPPLEMENTAL_Matl/rCLAMPS/hd1-explore/testSetLogos/PBX2_157.pdf]

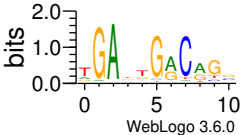

Supplement: SUPPLEMENTAL_Matl.zip [file PBX3_158.pdf › SUPPLEMENTAL_Matl/rCLAMPS/hd1-explore/testSetLogos/PBX3_158.pdf]

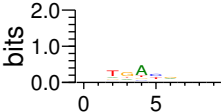

WebLogo 3.6.0

Supplement: SUPPLEMENTAL_Matl.zip [file PBX4_159.pdf › SUPPLEMENTAL_Matl/rCLAMPS/hd1-explore/testSetLogos/PBX4_159.pdf]

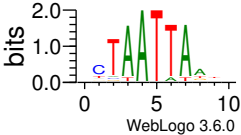

Supplement: SUPPLEMENTAL_Matl.zip [file PBX4_R215Q_160.pdf › SUPPLEMENTAL_Matl/rCLAMPS/hd1-explore/testSetLogos/PBX4_R215Q_160.pdf]

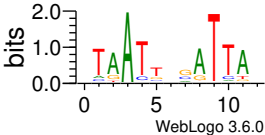

Supplement: SUPPLEMENTAL_Matl.zip [file PHDP_161.pdf › SUPPLEMENTAL_Matl/rCLAMPS/hd1-explore/testSetLogos/PHDP_161.pdf]

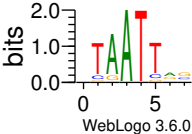

Supplement: SUPPLEMENTAL_Matl.zip [file PHOX2A_162.pdf › SUPPLEMENTAL_Matl/rCLAMPS/hd1-explore/testSetLogos/PHOX2A_162.pdf]

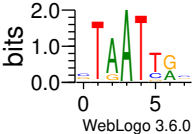

Supplement: SUPPLEMENTAL_Matl.zip [file PHOX2B_163.pdf › SUPPLEMENTAL_Matl/rCLAMPS/hd1-explore/testSetLogos/PHOX2B_163.pdf]

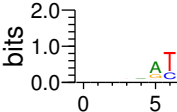

Supplement: SUPPLEMENTAL_Matl.zip [file PHOX2B_Q143R_164.pdf › SUPPLEMENTAL_Matl/rCLAMPS/hd1-explore/testSetLogos/PHOX2B_Q143R_164.pdf]

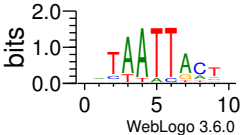

Supplement: SUPPLEMENTAL_Matl.zip [file PHOX2B_R100L_165.pdf › SUPPLEMENTAL_Matl/rCLAMPS/hd1-explore/testSetLogos/PHOX2B_R100L_165.pdf]

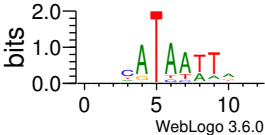

Supplement: SUPPLEMENTAL_Matl.zip [file PHOX2B_R141G_166.pdf › SUPPLEMENTAL_Matl/rCLAMPS/hd1-explore/testSetLogos/PHOX2B_R141G_166.pdf]

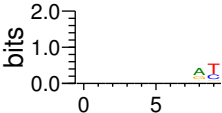

WebLogo 3.6.0

Supplement: SUPPLEMENTAL_Matl.zip [file PHOX2B_R141Q_167.pdf › SUPPLEMENTAL_Matl/rCLAMPS/hd1-explore/testSetLogos/PHOX2B_R141Q_167.pdf]

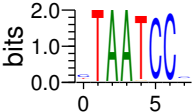

WebLogo 3.6.0

Supplement: SUPPLEMENTAL_Matl.zip [file PITX1_168.pdf › SUPPLEMENTAL_Matl/rCLAMPS/hd1-explore/testSetLogos/PITX1_168.pdf]

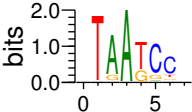

WebLogo 3.6.0

Supplement: SUPPLEMENTAL_Matl.zip [file PITX2_169.pdf › SUPPLEMENTAL_Matl/rCLAMPS/hd1-explore/testSetLogos/PITX2_169.pdf]

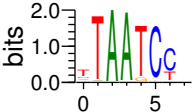

Supplement: SUPPLEMENTAL_Matl.zip [file PITX2_L100Q_170.pdf › SUPPLEMENTAL_Matl/rCLAMPS/hd1-explore/testSetLogos/PITX2_L100Q_170.pdf]

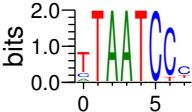

WebLogo 3.6.0

Supplement: SUPPLEMENTAL_Matl.zip [file PITX2_R108H_171.pdf › SUPPLEMENTAL_Matl/rCLAMPS/hd1-explore/testSetLogos/PITX2_R108H_171.pdf]

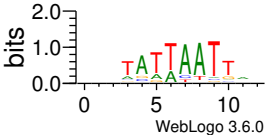

Supplement: SUPPLEMENTAL_Matl.zip [file PITX2_R130W_172.pdf › SUPPLEMENTAL_Matl/rCLAMPS/hd1-explore/testSetLogos/PITX2_R130W_172.pdf]

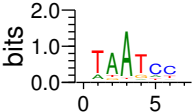

WebLogo 3.6.0

Supplement: SUPPLEMENTAL_Matl.zip [file PITX2_T114P_173.pdf › SUPPLEMENTAL_Matl/rCLAMPS/hd1-explore/testSetLogos/PITX2_T114P_173.pdf]

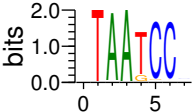

WebLogo 3.6.0

Supplement: SUPPLEMENTAL_Matl.zip [file PITX3_174.pdf › SUPPLEMENTAL_Matl/rCLAMPS/hd1-explore/testSetLogos/PITX3_174.pdf]

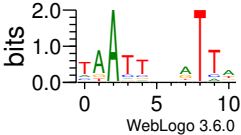

Supplement: SUPPLEMENTAL_Matl.zip [file PROP1_175.pdf › SUPPLEMENTAL_Matl/rCLAMPS/hd1-explore/testSetLogos/PROP1_175.pdf]

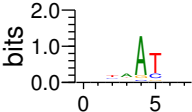

Supplement: SUPPLEMENTAL_Matl.zip [file PROP1_R112Q_176.pdf › SUPPLEMENTAL_Matl/rCLAMPS/hd1-explore/testSetLogos/PROP1_R112Q_176.pdf]

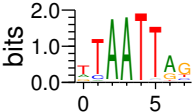

WebLogo 3.6.0

Supplement: SUPPLEMENTAL_Matl.zip [file PROP1_R99Q_177.pdf › SUPPLEMENTAL_Matl/rCLAMPS/hd1-explore/testSetLogos/PROP1_R99Q_177.pdf]

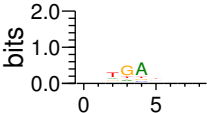

WebLogo 3.6.0

Supplement: SUPPLEMENTAL_Matl.zip [file Pbx1_178.pdf › SUPPLEMENTAL_Matl/rCLAMPS/hd1-explore/testSetLogos/Pbx1_178.pdf]



WebLogo 3.6.0

Supplement: SUPPLEMENTAL_Matl.zip [file Pbx2_179.pdf › SUPPLEMENTAL_Matl/rCLAMPS/hd1-explore/testSetLogos/Pbx2_179.pdf]

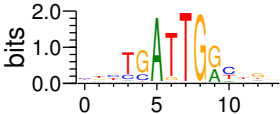

# WebLogo 3.6.0

Supplement: SUPPLEMENTAL_Matl.zip [file Pbx3_180.pdf › SUPPLEMENTAL_Matl/rCLAMPS/hd1-explore/testSetLogos/Pbx3_180.pdf]

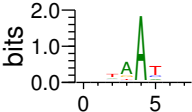

WebLogo 3.6.0

Supplement: SUPPLEMENTAL_Matl.zip [file Phox2a_181.pdf › SUPPLEMENTAL_Matl/rCLAMPS/hd1-explore/testSetLogos/Phox2a_181.pdf]

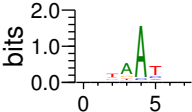

WebLogo 3.6.0

Supplement: SUPPLEMENTAL_Matl.zip [file Phox2b_182.pdf › SUPPLEMENTAL_Matl/rCLAMPS/hd1-explore/testSetLogos/Phox2b_182.pdf]

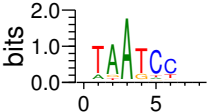

WebLogo 3.6.0

Supplement: SUPPLEMENTAL_Matl.zip [file Pitx1_183.pdf › SUPPLEMENTAL_Matl/rCLAMPS/hd1-explore/testSetLogos/Pitx1_183.pdf]

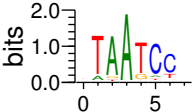

WebLogo 3.6.0

Supplement: SUPPLEMENTAL_Matl.zip [file Pitx2_184.pdf › SUPPLEMENTAL_Matl/rCLAMPS/hd1-explore/testSetLogos/Pitx2_184.pdf]

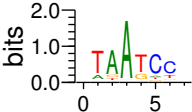

WebLogo 3.6.0

Supplement: SUPPLEMENTAL_Matl.zip [file Pitx3_185.pdf › SUPPLEMENTAL_Matl/rCLAMPS/hd1-explore/testSetLogos/Pitx3_185.pdf]

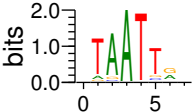

# WebLogo 3.6.0

Supplement: SUPPLEMENTAL_Matl.zip [file Pph13_186.pdf › SUPPLEMENTAL_Matl/rCLAMPS/hd1-explore/testSetLogos/Pph13_186.pdf]

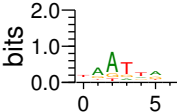

WebLogo 3.6.0

Supplement: SUPPLEMENTAL_Matl.zip [file Prop1_187.pdf › SUPPLEMENTAL_Matl/rCLAMPS/hd1-explore/testSetLogos/Prop1_187.pdf]

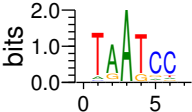

Supplement: SUPPLEMENTAL_Matl.zip [file Ptx1_188.pdf › SUPPLEMENTAL_Matl/rCLAMPS/hd1-explore/testSetLogos/Ptx1_188.pdf]

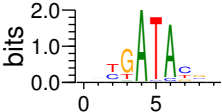

Supplement: SUPPLEMENTAL_Matl.zip [file SIX3_189.pdf › SUPPLEMENTAL_Matl/rCLAMPS/hd1-explore/testSetLogos/SIX3_189.pdf]

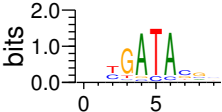

WebLogo 3.6.0

Supplement: SUPPLEMENTAL_Matl.zip [file SIX6_190.pdf › SUPPLEMENTAL_Matl/rCLAMPS/hd1-explore/testSetLogos/SIX6_190.pdf]

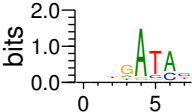

WebLogo 3.6.0

Supplement: SUPPLEMENTAL_Matl.zip [file SIX6_H141N_191.pdf › SUPPLEMENTAL_Matl/rCLAMPS/hd1-explore/testSetLogos/SIX6_H141N_191.pdf]

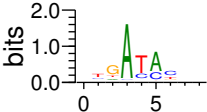

WebLogo 3.6.0

Supplement: SUPPLEMENTAL_Matl.zip [file SIX6_T165A_192.pdf › SUPPLEMENTAL_Matl/rCLAMPS/hd1-explore/testSetLogos/SIX6_T165A_192.pdf]

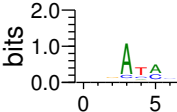

WebLogo 3.6.0

Supplement: SUPPLEMENTAL_Matl.zip [file Six3_193.pdf › SUPPLEMENTAL_Matl/rCLAMPS/hd1-explore/testSetLogos/Six3_193.pdf]

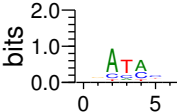

WebLogo 3.6.0

Supplement: SUPPLEMENTAL_Matl.zip [file Six6_194.pdf › SUPPLEMENTAL_Matl/rCLAMPS/hd1-explore/testSetLogos/Six6_194.pdf]

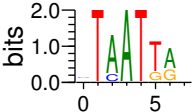

WebLogo 3.6.0

Supplement: SUPPLEMENTAL_Matl.zip [file VAX1_195.pdf › SUPPLEMENTAL_Matl/rCLAMPS/hd1-explore/testSetLogos/VAX1_195.pdf]

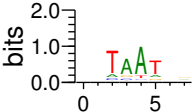

WebLogo 3.6.0

Supplement: SUPPLEMENTAL_Matl.zip [file VAX2_196.pdf › SUPPLEMENTAL_Matl/rCLAMPS/hd1-explore/testSetLogos/VAX2_196.pdf]

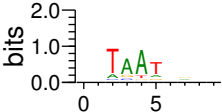

Supplement: SUPPLEMENTAL_Matl.zip [file VAX2_L139M_197.pdf › SUPPLEMENTAL_Matl/rCLAMPS/hd1-explore/testSetLogos/VAX2_L139M_197.pdf]

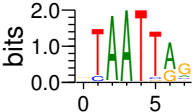

Supplement: SUPPLEMENTAL_Matl.zip [file VENTX_198.pdf › SUPPLEMENTAL_Matl/rCLAMPS/hd1-explore/testSetLogos/VENTX_198.pdf]

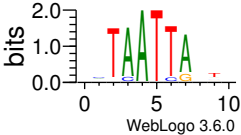

Supplement: SUPPLEMENTAL_Matl.zip [file VENTX_E101K_199.pdf › SUPPLEMENTAL_Matl/rCLAMPS/hd1-explore/testSetLogos/VENTX_E101K_199.pdf]

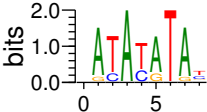

WebLogo 3.6.0

Supplement: SUPPLEMENTAL_Matl.zip [file VENTX_R143C_200.pdf › SUPPLEMENTAL_Matl/rCLAMPS/hd1-explore/testSetLogos/VENTX_R143C_200.pdf]

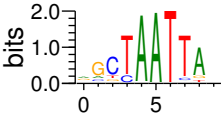

Supplement: SUPPLEMENTAL_Matl.zip [file VSX1_201.pdf › SUPPLEMENTAL_Matl/rCLAMPS/hd1-explore/testSetLogos/VSX1_201.pdf]

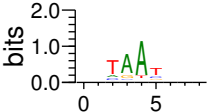

Supplement: SUPPLEMENTAL_Matl.zip [file VSX1_G160D_202.pdf › SUPPLEMENTAL_Matl/rCLAMPS/hd1-explore/testSetLogos/VSX1_G160D_202.pdf]

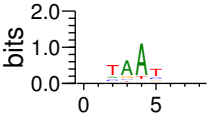

WebLogo 3.6.0

Supplement: SUPPLEMENTAL_Matl.zip [file VSX1_Q175H_203.pdf › SUPPLEMENTAL_Matl/rCLAMPS/hd1-explore/testSetLogos/VSX1_Q175H_203.pdf]

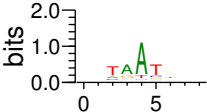

Supplement: SUPPLEMENTAL_Matl.zip [file VSX1_R166Q_204.pdf › SUPPLEMENTAL_Matl/rCLAMPS/hd1-explore/testSetLogos/VSX1_R166Q_204.pdf]

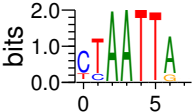

WebLogo 3.6.0

Supplement: SUPPLEMENTAL_Matl.zip [file VSX2_205.pdf › SUPPLEMENTAL_Matl/rCLAMPS/hd1-explore/testSetLogos/VSX2_205.pdf]

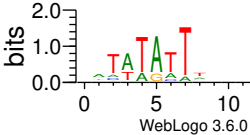

Supplement: SUPPLEMENTAL_Matl.zip [file VSX2_R200P_206.pdf › SUPPLEMENTAL_Matl/rCLAMPS/hd1-explore/testSetLogos/VSX2_R200P_206.pdf]

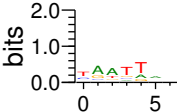

WebLogo 3.6.0

Supplement: SUPPLEMENTAL_Matl.zip [file VSX2_R200Q_207.pdf › SUPPLEMENTAL_Matl/rCLAMPS/hd1-explore/testSetLogos/VSX2_R200Q_207.pdf]

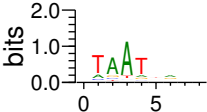

WebLogo 3.6.0

Supplement: SUPPLEMENTAL_Matl.zip [file Vax1_208.pdf › SUPPLEMENTAL_Matl/rCLAMPS/hd1-explore/testSetLogos/Vax1_208.pdf]

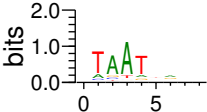

WebLogo 3.6.0

Supplement: SUPPLEMENTAL_Matl.zip [file Vax2_209.pdf › SUPPLEMENTAL_Matl/rCLAMPS/hd1-explore/testSetLogos/Vax2_209.pdf]

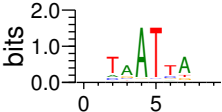

WebLogo 3.6.0

Supplement: SUPPLEMENTAL_Matl.zip [file ZFHX2_210.pdf › SUPPLEMENTAL_Matl/rCLAMPS/hd1-explore/testSetLogos/ZFHX2_210.pdf]

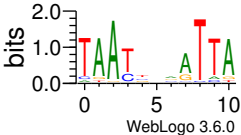

Supplement: SUPPLEMENTAL_Matl.zip [file al_211.pdf › SUPPLEMENTAL_Matl/rCLAMPS/hd1-explore/testSetLogos/al_211.pdf]

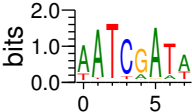

WebLogo 3.6.0

Supplement: SUPPLEMENTAL_Matl.zip [file ceh-28_212.pdf › SUPPLEMENTAL_Matl/rCLAMPS/hd1-explore/testSetLogos/ceh-28_212.pdf]

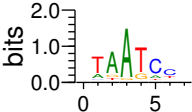

WebLogo 3.6.0

Supplement: SUPPLEMENTAL_Matl.zip [file ceh-36_213.pdf › SUPPLEMENTAL_Matl/rCLAMPS/hd1-explore/testSetLogos/ceh-36_213.pdf]

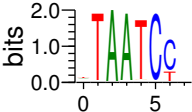

WebLogo 3.6.0

Supplement: SUPPLEMENTAL_Matl.zip [file ceh-37_214.pdf › SUPPLEMENTAL_Matl/rCLAMPS/hd1-explore/testSetLogos/ceh-37_214.pdf]

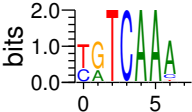

WebLogo 3.6.0

Supplement: SUPPLEMENTAL_Matl.zip [file exd_215.pdf › SUPPLEMENTAL_Matl/rCLAMPS/hd1-explore/testSetLogos/exd_215.pdf]

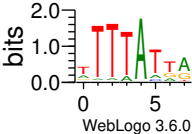

Supplement: SUPPLEMENTAL_Matl.zip [file hoxd13a_216.pdf › SUPPLEMENTAL_Matl/rCLAMPS/hd1-explore/testSetLogos/hoxd13a_216.pdf]

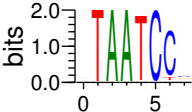

WebLogo 3.6.0

Supplement: SUPPLEMENTAL_Matl.zip [file oc_217.pdf › SUPPLEMENTAL_Matl/rCLAMPS/hd1-explore/testSetLogos/oc_217.pdf]

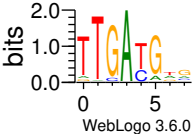

Supplement: SUPPLEMENTAL_Matl.zip [file pbx4_218.pdf › SUPPLEMENTAL_Matl/rCLAMPS/hd1-explore/testSetLogos/pbx4_218.pdf]

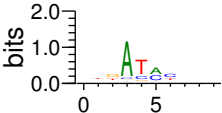

WebLogo 3.6.0

Supplement: SUPPLEMENTAL_Matl.zip [file six3_219.pdf › SUPPLEMENTAL_Matl/rCLAMPS/hd1-explore/testSetLogos/six3_219.pdf]

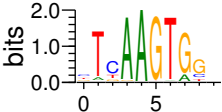

WebLogo 3.6.0

Supplement: SUPPLEMENTAL_Matl.zip [file tin_220.pdf › SUPPLEMENTAL_Matl/rCLAMPS/hd1-explore/testSetLogos/tin_220.pdf]

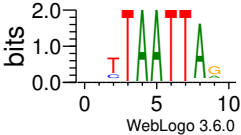

Supplement: SUPPLEMENTAL_Matl.zip [file vsx2_221.pdf › SUPPLEMENTAL_Matl/rCLAMPS/hd1-explore/testSetLogos/vsx2_221.pdf]

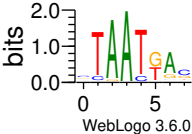

Supplement: SUPPLEMENTAL_Matl.zip [file zen2_223.pdf › SUPPLEMENTAL_Matl/rCLAMPS/hd1-explore/testSetLogos/zen2_223.pdf]

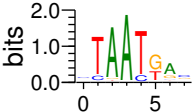

WebLogo 3.6.0

Supplement: SUPPLEMENTAL_Matl.zip [file zen_222.pdf › SUPPLEMENTAL_Matl/rCLAMPS/hd1-explore/testSetLogos/zen_222.pdf]

Fraction of columns with  $\text{PCC} \geq x$

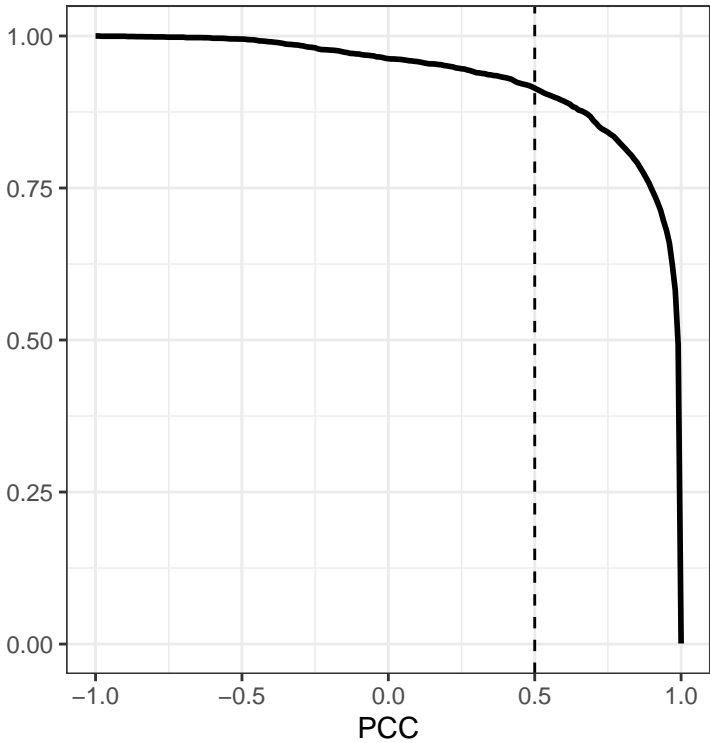

Supplement: SUPPLEMENTAL_Matl.zip [file Figure2_left.pdf › SUPPLEMENTAL_Matl/rCLAMPS/my_results/allHomeodomainProts/Figure2_left.pdf]

PCC between predicted and actual

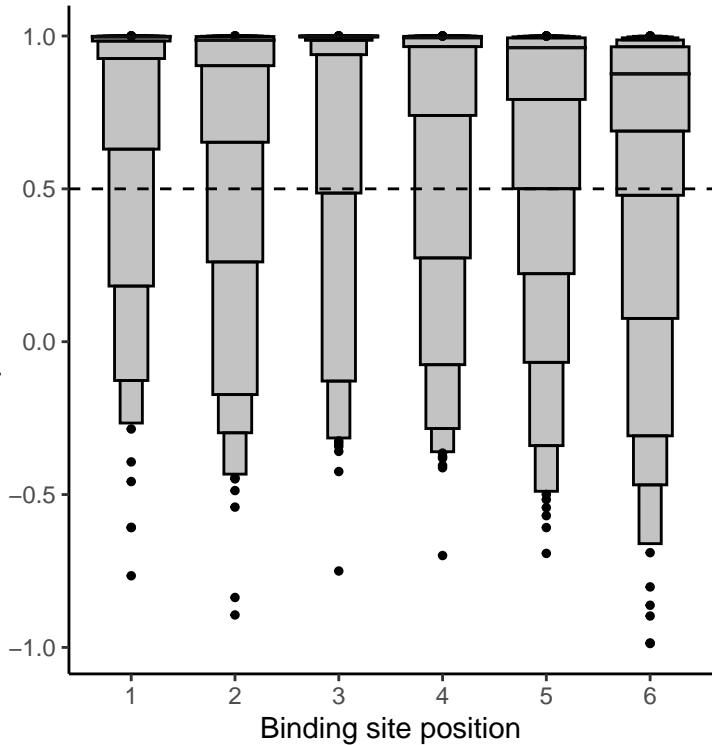

Supplement: SUPPLEMENTAL_Matl.zip [file Figure2_right.pdf › SUPPLEMENTAL_Matl/rCLAMPS/my_results/allHomeodomainProts/Figure2_right.pdf]

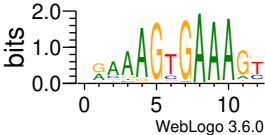

Supplement: SUPPLEMENTAL_Matl.zip [file Blimp-1_QSNVQAHKSSNTQVHL_0.pdf › SUPPLEMENTAL_Matl/rCLAMPS/my_results/zf-C2H2_250_50_seedFFSdiverse6/0_logos_aligned_hoo/Blimp-1_QSNVQAHKSSNTQVHL_0.pdf]

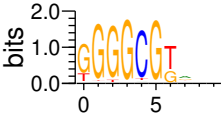

WebLogo 3.6.0

Supplement: SUPPLEMENTAL_Matl.zip [file Bteb2_KAHARDERRDHK_1.pdf › SUPPLEMENTAL_Matl/rCLAMPS/my_results/zf-C2H2_250_50_seedFFSdiverse6/0_logos_aligned_hoo/Bteb2_KAHARDERRDHK_1.pdf]

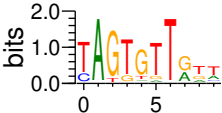

WebLogo 3.6.0

Supplement: SUPPLEMENTAL_Matl.zip [file CG10267_YSVSYHSKLHHQ_2.pdf › SUPPLEMENTAL_Matl/rCLAMPS/my_results/zf-C2H2_250_50_seedFFSdiverse6/0_logos_aligned_hoo/CG10267_YSVSYHSKLHHQ_2.pdf]

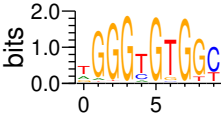

WebLogo 3.6.0

Supplement: SUPPLEMENTAL_Matl.zip [file CG12029_KSHARDERRDHL_3.pdf › SUPPLEMENTAL_Matl/rCLAMPS/my_results/zf-C2H2_250_50_seedFFSdiverse6/0_logos_aligned_hoo/CG12029_KSHARDERRDHL_3.pdf]

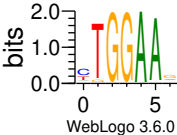

Supplement: SUPPLEMENTAL_Matl.zip [file CG12236-PB_TVNRNYSE_5.pdf › SUPPLEMENTAL_Matl/rCLAMPS/my_results/zf-C2H2_250_50_seedFFSdiverse6/0_logos_aligned_hoo/CG12236-PB_TVNRNYSE_5.pdf]

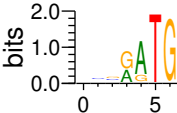

Supplement: SUPPLEMENTAL_Matl.zip [file CG12236_SNARTWST_4.pdf › SUPPLEMENTAL_Matl/rCLAMPS/my_results/zf-C2H2_250_50_seedFFSdiverse6/0_logos_aligned_hoo/CG12236_SNARTWST_4.pdf]

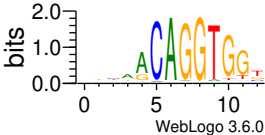

Supplement: SUPPLEMENTAL_Matl.zip [file CG17181_SPAMRWLGDSNALSYK_6.pdf › SUPPLEMENTAL_Matl/rCLAMPS/my_results/zf-C2H2_250_50_seedFFSdiverse6/0_logos_aligned_hoo/CG17181_SPAMRWLGDSNALSYK_6.pdf]
