# Supplementary figures and images for: Learning probabilistic protein–DNA recognition codes from DNA-binding specificities using structural mappings (part 7 of 25)
Source: HighWire-hosted journal article supplement (doi:10.1101/gr.276606.122), 2022-09-01

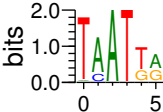

WebLogo 3.6.0

Supplement: SUPPLEMENTAL_Matl.zip [file NOTO_KRVRVQNVK_387.pdf › SUPPLEMENTAL_Matl/rCLAMPS/STAMP/alignedLogos_NoyesGrps/logos_1/NOTO_KRVRVQNVK_387.pdf]

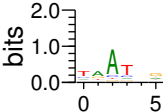

Supplement: SUPPLEMENTAL_Matl.zip [file Nanog_QKMRTQNMK.pdf › SUPPLEMENTAL_Matl/rCLAMPS/STAMP/alignedLogos_NoyesGrps/logos_1/Nanog_QKMRTQNMK.pdf]



WebLogo 3.6.0

Supplement: SUPPLEMENTAL_Matl.zip [file Nanog_QKMRTQNMK_388.pdf › SUPPLEMENTAL_Matl/rCLAMPS/STAMP/alignedLogos_NoyesGrps/logos_1/Nanog_QKMRTQNMK_388.pdf]

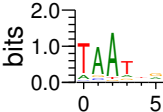

WebLogo 3.6.0

Supplement: SUPPLEMENTAL_Matl.zip [file Nkx1-1_RRARIQNTK.pdf › SUPPLEMENTAL_Matl/rCLAMPS/STAMP/alignedLogos_NoyesGrps/logos_1/Nkx1-1_RRARIQNTK.pdf]



WebLogo 3.6.0

Supplement: SUPPLEMENTAL_Matl.zip [file Nkx1-1_RRARIQNTK_389.pdf › SUPPLEMENTAL_Matl/rCLAMPS/STAMP/alignedLogos_NoyesGrps/logos_1/Nkx1-1_RRARIQNTK_389.pdf]

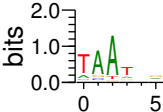

WebLogo 3.6.0

Supplement: SUPPLEMENTAL_Matl.zip [file Nkx1-2_RRARIQNTK.pdf › SUPPLEMENTAL_Matl/rCLAMPS/STAMP/alignedLogos_NoyesGrps/logos_1/Nkx1-2_RRARIQNTK.pdf]



Supplement: SUPPLEMENTAL_Matl.zip [file Nkx1-2_RRARIQNTK_390.pdf › SUPPLEMENTAL_Matl/rCLAMPS/STAMP/alignedLogos_NoyesGrps/logos_1/Nkx1-2_RRARIQNTK_390.pdf]

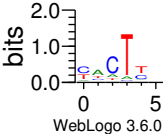

Supplement: SUPPLEMENTAL_Matl.zip [file Nkx2-1_RKRRIQNYK.pdf › SUPPLEMENTAL_Matl/rCLAMPS/STAMP/alignedLogos_NoyesGrps/logos_1/Nkx2-1_RKRRIQNYK.pdf]



Supplement: SUPPLEMENTAL_Matl.zip [file Nkx2-1_RKRRIQNYK_391.pdf › SUPPLEMENTAL_Matl/rCLAMPS/STAMP/alignedLogos_NoyesGrps/logos_1/Nkx2-1_RKRRIQNYK_391.pdf]

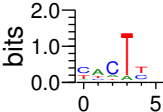

WebLogo 3.6.0

Supplement: SUPPLEMENTAL_Matl.zip [file Nkx2-2_RKRRIQNYK.pdf › SUPPLEMENTAL_Matl/rCLAMPS/STAMP/alignedLogos_NoyesGrps/logos_1/Nkx2-2_RKRRIQNYK.pdf]



WebLogo 3.6.0

Supplement: SUPPLEMENTAL_Matl.zip [file Nkx2-2_RKRRIQNYK_392.pdf › SUPPLEMENTAL_Matl/rCLAMPS/STAMP/alignedLogos_NoyesGrps/logos_1/Nkx2-2_RKRRIQNYK_392.pdf]

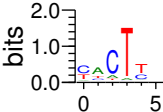

WebLogo 3.6.0

Supplement: SUPPLEMENTAL_Matl.zip [file Nkx2-4_RKRRIQNYK.pdf › SUPPLEMENTAL_Matl/rCLAMPS/STAMP/alignedLogos_NoyesGrps/logos_1/Nkx2-4_RKRRIQNYK.pdf]



WebLogo 3.6.0

Supplement: SUPPLEMENTAL_Matl.zip [file Nkx2-4_RKRRIQNYK_393.pdf › SUPPLEMENTAL_Matl/rCLAMPS/STAMP/alignedLogos_NoyesGrps/logos_1/Nkx2-4_RKRRIQNYK_393.pdf]

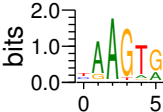

WebLogo 3.6.0

Supplement: SUPPLEMENTAL_Matl.zip [file Nkx2-6_RKSRIQNYK.pdf › SUPPLEMENTAL_Matl/rCLAMPS/STAMP/alignedLogos_NoyesGrps/logos_1/Nkx2-6_RKSRIQNYK.pdf]



WebLogo 3.6.0

Supplement: SUPPLEMENTAL_Matl.zip [file Nkx2-6_RKSRIQNYK_394.pdf › SUPPLEMENTAL_Matl/rCLAMPS/STAMP/alignedLogos_NoyesGrps/logos_1/Nkx2-6_RKSRIQNYK_394.pdf]

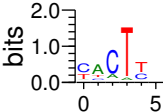

WebLogo 3.6.0

Supplement: SUPPLEMENTAL_Matl.zip [file Nkx2-9_RKRRIQNYK.pdf › SUPPLEMENTAL_Matl/rCLAMPS/STAMP/alignedLogos_NoyesGrps/logos_1/Nkx2-9_RKRRIQNYK.pdf]



WebLogo 3.6.0

Supplement: SUPPLEMENTAL_Matl.zip [file Nkx2-9_RKRRIQNYK_395.pdf › SUPPLEMENTAL_Matl/rCLAMPS/STAMP/alignedLogos_NoyesGrps/logos_1/Nkx2-9_RKRRIQNYK_395.pdf]

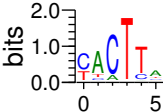

WebLogo 3.6.0

Supplement: SUPPLEMENTAL_Matl.zip [file Nkx3-1_KRSRIQNYK_396.pdf › SUPPLEMENTAL_Matl/rCLAMPS/STAMP/alignedLogos_NoyesGrps/logos_1/Nkx3-1_KRSRIQNYK_396.pdf]

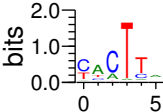

WebLogo 3.6.0

Supplement: SUPPLEMENTAL_Matl.zip [file Nkx3-2_KRSRIQNYK_397.pdf › SUPPLEMENTAL_Matl/rCLAMPS/STAMP/alignedLogos_NoyesGrps/logos_1/Nkx3-2_KRSRIQNYK_397.pdf]

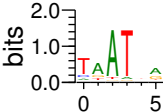

WebLogo 3.6.0

Supplement: SUPPLEMENTAL_Matl.zip [file Nkx6-1_KHTRVQNTK.pdf › SUPPLEMENTAL_Matl/rCLAMPS/STAMP/alignedLogos_NoyesGrps/logos_1/Nkx6-1_KHTRVQNTK.pdf]



Supplement: SUPPLEMENTAL_Matl.zip [file Nkx6-1_KHTRVQNTK_398.pdf › SUPPLEMENTAL_Matl/rCLAMPS/STAMP/alignedLogos_NoyesGrps/logos_1/Nkx6-1_KHTRVQNTK_398.pdf]

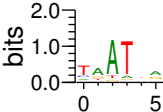

WebLogo 3.6.0

Supplement: SUPPLEMENTAL_Matl.zip [file Nkx6-3_KHTRVQNTK_399.pdf › SUPPLEMENTAL_Matl/rCLAMPS/STAMP/alignedLogos_NoyesGrps/logos_1/Nkx6-3_KHTRVQNTK_399.pdf]

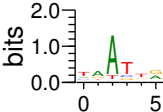

WebLogo 3.6.0

Supplement: SUPPLEMENTAL_Matl.zip [file Nobox_KKTRVQNAK_400.pdf › SUPPLEMENTAL_Matl/rCLAMPS/STAMP/alignedLogos_NoyesGrps/logos_1/Nobox_KKTRVQNAK_400.pdf]

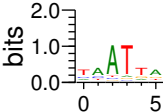

WebLogo 3.6.0

Supplement: SUPPLEMENTAL_Matl.zip [file Noto_KRVRIQNVK.pdf › SUPPLEMENTAL_Matl/rCLAMPS/STAMP/alignedLogos_NoyesGrps/logos_1/Noto_KRVRIQNVK.pdf]



WebLogo 3.6.0

Supplement: SUPPLEMENTAL_Matl.zip [file Noto_KRVRIQNVK_401.pdf › SUPPLEMENTAL_Matl/rCLAMPS/STAMP/alignedLogos_NoyesGrps/logos_1/Noto_KRVRIQNVK_401.pdf]

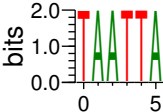

WebLogo 3.6.0

Supplement: SUPPLEMENTAL_Matl.zip [file O76842_CUPSA_GSGRIQNMK_402.pdf › SUPPLEMENTAL_Matl/rCLAMPS/STAMP/alignedLogos_NoyesGrps/logos_1/O76842_CUPSA_GSGRIQNMK_402.pdf]

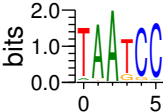

WebLogo 3.6.0

Supplement: SUPPLEMENTAL_Matl.zip [file OTX1_RRERVKNAK.pdf › SUPPLEMENTAL_Matl/rCLAMPS/STAMP/alignedLogos_NoyesGrps/logos_1/OTX1_RRERVKNAK.pdf]

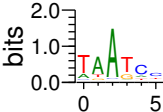

WebLogo 3.6.0

Supplement: SUPPLEMENTAL_Matl.zip [file OTX2_RRERVKNAK.pdf › SUPPLEMENTAL_Matl/rCLAMPS/STAMP/alignedLogos_NoyesGrps/logos_1/OTX2_RRERVKNAK.pdf]

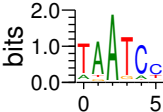

WebLogo 3.6.0

Supplement: SUPPLEMENTAL_Matl.zip [file Obox1_RKERIKNAK.pdf › SUPPLEMENTAL_Matl/rCLAMPS/STAMP/alignedLogos_NoyesGrps/logos_1/Obox1_RKERIKNAK.pdf]



WebLogo 3.6.0

Supplement: SUPPLEMENTAL_Matl.zip [file Obox1_RKERIKNAK_403.pdf › SUPPLEMENTAL_Matl/rCLAMPS/STAMP/alignedLogos_NoyesGrps/logos_1/Obox1_RKERIKNAK_403.pdf]

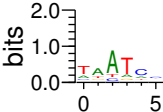

WebLogo 3.6.0

Supplement: SUPPLEMENTAL_Matl.zip [file Obox3_RKERIKNAK.pdf › SUPPLEMENTAL_Matl/rCLAMPS/STAMP/alignedLogos_NoyesGrps/logos_1/Obox3_RKERIKNAK.pdf]



WebLogo 3.6.0

Supplement: SUPPLEMENTAL_Matl.zip [file Obox3_RKERIKNAK_404.pdf › SUPPLEMENTAL_Matl/rCLAMPS/STAMP/alignedLogos_NoyesGrps/logos_1/Obox3_RKERIKNAK_404.pdf]

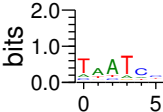

WebLogo 3.6.0

Supplement: SUPPLEMENTAL_Matl.zip [file Obox5_RKERIKNAK.pdf › SUPPLEMENTAL_Matl/rCLAMPS/STAMP/alignedLogos_NoyesGrps/logos_1/Obox5_RKERIKNAK.pdf]



WebLogo 3.6.0

Supplement: SUPPLEMENTAL_Matl.zip [file Obox5_RKERIKNAK_405.pdf › SUPPLEMENTAL_Matl/rCLAMPS/STAMP/alignedLogos_NoyesGrps/logos_1/Obox5_RKERIKNAK_405.pdf]

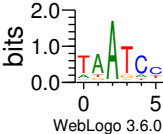

Supplement: SUPPLEMENTAL_Matl.zip [file Obox6_RKIRIKNAK.pdf › SUPPLEMENTAL_Matl/rCLAMPS/STAMP/alignedLogos_NoyesGrps/logos_1/Obox6_RKIRIKNAK.pdf]



Supplement: SUPPLEMENTAL_Matl.zip [file Obox6_RKIRIKNAK_406.pdf › SUPPLEMENTAL_Matl/rCLAMPS/STAMP/alignedLogos_NoyesGrps/logos_1/Obox6_RKIRIKNAK_406.pdf]

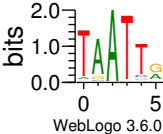

Supplement: SUPPLEMENTAL_Matl.zip [file OdsH_RRGRVQNAK.pdf › SUPPLEMENTAL_Matl/rCLAMPS/STAMP/alignedLogos_NoyesGrps/logos_1/OdsH_RRGRVQNAK.pdf]



Supplement: SUPPLEMENTAL_Matl.zip [file OdsH_RRGRVQNAK_407.pdf › SUPPLEMENTAL_Matl/rCLAMPS/STAMP/alignedLogos_NoyesGrps/logos_1/OdsH_RRGRVQNAK_407.pdf]

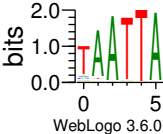

Supplement: SUPPLEMENTAL_Matl.zip [file Optix_EQKTNKNQR.pdf › SUPPLEMENTAL_Matl/rCLAMPS/STAMP/alignedLogos_NoyesGrps/logos_1/Optix_EQKTNKNQR.pdf]

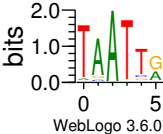

Supplement: SUPPLEMENTAL_Matl.zip [file Otp_KRHRVQNAK.pdf › SUPPLEMENTAL_Matl/rCLAMPS/STAMP/alignedLogos_NoyesGrps/logos_1/Otp_KRHRVQNAK.pdf]

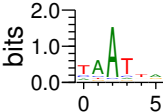

WebLogo 3.6.0

Supplement: SUPPLEMENTAL_Matl.zip [file Otp_KRHRVQNAK_408.pdf › SUPPLEMENTAL_Matl/rCLAMPS/STAMP/alignedLogos_NoyesGrps/logos_1/Otp_KRHRVQNAK_408.pdf]

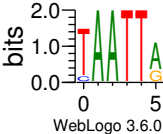

Supplement: SUPPLEMENTAL_Matl.zip [file P79681_ACIBE_RRPRIQNAK.pdf › SUPPLEMENTAL_Matl/rCLAMPS/STAMP/alignedLogos_NoyesGrps/logos_1/P79681_ACIBE_RRPRIQNAK.pdf]

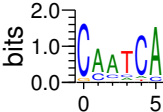

WebLogo 3.6.0

Supplement: SUPPLEMENTAL_Matl.zip [file PBX1_RRKRNGNIR.pdf › SUPPLEMENTAL_Matl/rCLAMPS/STAMP/alignedLogos_NoyesGrps/logos_1/PBX1_RRKRNGNIR.pdf]

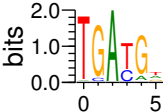

WebLogo 3.6.0

Supplement: SUPPLEMENTAL_Matl.zip [file PBX4_RRKRNGNIR.pdf › SUPPLEMENTAL_Matl/rCLAMPS/STAMP/alignedLogos_NoyesGrps/logos_1/PBX4_RRKRNGNIR.pdf]

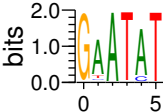

Supplement: SUPPLEMENTAL_Matl.zip [file PDF2_KKRYFQNTQ_409.pdf › SUPPLEMENTAL_Matl/rCLAMPS/STAMP/alignedLogos_NoyesGrps/logos_1/PDF2_KKRYFQNTQ_409.pdf]

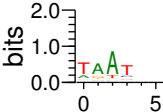

WebLogo 3.6.0

Supplement: SUPPLEMENTAL_Matl.zip [file PDX1_KRTRIQNMK.pdf › SUPPLEMENTAL_Matl/rCLAMPS/STAMP/alignedLogos_NoyesGrps/logos_1/PDX1_KRTRIQNMK.pdf]

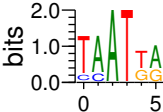

WebLogo 3.6.0

Supplement: SUPPLEMENTAL_Matl.zip [file PDX1_KRTRIQNMK_410.pdf › SUPPLEMENTAL_Matl/rCLAMPS/STAMP/alignedLogos_NoyesGrps/logos_1/PDX1_KRTRIQNMK_410.pdf]

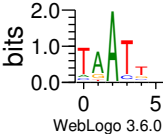

Supplement: SUPPLEMENTAL_Matl.zip [file PHDP_RRIRVQNAK.pdf › SUPPLEMENTAL_Matl/rCLAMPS/STAMP/alignedLogos_NoyesGrps/logos_1/PHDP_RRIRVQNAK.pdf]

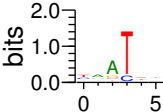

WebLogo 3.6.0

Supplement: SUPPLEMENTAL_Matl.zip [file PHO2_RPKRIQNAK.pdf › SUPPLEMENTAL_Matl/rCLAMPS/STAMP/alignedLogos_NoyesGrps/logos_1/PHO2_RPKRIQNAK.pdf]



WebLogo 3.6.0

Supplement: SUPPLEMENTAL_Matl.zip [file PHO2_RPKRIQNAK_411.pdf › SUPPLEMENTAL_Matl/rCLAMPS/STAMP/alignedLogos_NoyesGrps/logos_1/PHO2_RPKRIQNAK_411.pdf]

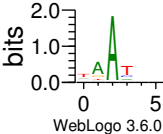

Supplement: SUPPLEMENTAL_Matl.zip [file PHOX2A_RRIRVQNAK.pdf › SUPPLEMENTAL_Matl/rCLAMPS/STAMP/alignedLogos_NoyesGrps/logos_1/PHOX2A_RRIRVQNAK.pdf]

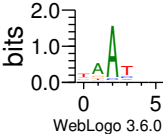

Supplement: SUPPLEMENTAL_Matl.zip [file PHOX2B_RRIRVQNAK.pdf › SUPPLEMENTAL_Matl/rCLAMPS/STAMP/alignedLogos_NoyesGrps/logos_1/PHOX2B_RRIRVQNAK.pdf]

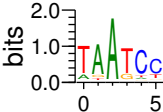

WebLogo 3.6.0

Supplement: SUPPLEMENTAL_Matl.zip [file PITX1_RRQRVKNAK.pdf › SUPPLEMENTAL_Matl/rCLAMPS/STAMP/alignedLogos_NoyesGrps/logos_1/PITX1_RRQRVKNAK.pdf]

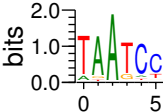

WebLogo 3.6.0

Supplement: SUPPLEMENTAL_Matl.zip [file PITX2_RRQRVKNAK.pdf › SUPPLEMENTAL_Matl/rCLAMPS/STAMP/alignedLogos_NoyesGrps/logos_1/PITX2_RRQRVKNAK.pdf]

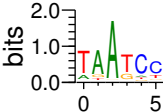

WebLogo 3.6.0

Supplement: SUPPLEMENTAL_Matl.zip [file PITX3_RRQRVKNAK.pdf › SUPPLEMENTAL_Matl/rCLAMPS/STAMP/alignedLogos_NoyesGrps/logos_1/PITX3_RRQRVKNAK.pdf]

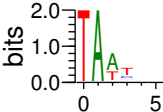

WebLogo 3.6.0

Supplement: SUPPLEMENTAL_Matl.zip [file PK19166.1_SASYKENWS_412.pdf › SUPPLEMENTAL_Matl/rCLAMPS/STAMP/alignedLogos_NoyesGrps/logos_1/PK19166.1_SASYKENWS_412.pdf]

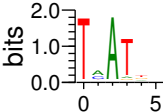

WebLogo 3.6.0

Supplement: SUPPLEMENTAL_Matl.zip [file PK20392.1_GEKKIQNAR_413.pdf › SUPPLEMENTAL_Matl/rCLAMPS/STAMP/alignedLogos_NoyesGrps/logos_1/PK20392.1_GEKKIQNAR_413.pdf]

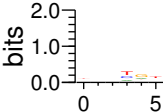

WebLogo 3.6.0

Supplement: SUPPLEMENTAL_Matl.zip [file PK24181.1_KKRYFQNTQ.pdf › SUPPLEMENTAL_Matl/rCLAMPS/STAMP/alignedLogos_NoyesGrps/logos_1/PK24181.1_KKRYFQNTQ.pdf]



WebLogo 3.6.0

Supplement: SUPPLEMENTAL_Matl.zip [file PK24181.1_KKRYFQNTQ_414.pdf › SUPPLEMENTAL_Matl/rCLAMPS/STAMP/alignedLogos_NoyesGrps/logos_1/PK24181.1_KKRYFQNTQ_414.pdf]

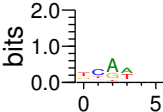

Supplement: SUPPLEMENTAL_Matl.zip [file PK25011.1_NKKRGCHLK.pdf › SUPPLEMENTAL_Matl/rCLAMPS/STAMP/alignedLogos_NoyesGrps/logos_1/PK25011.1_NKKRGCHLK.pdf]

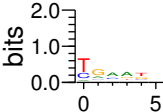

WebLogo 3.6.0

Supplement: SUPPLEMENTAL_Matl.zip [file PK25011.1_NKKRGCHLK_415.pdf › SUPPLEMENTAL_Matl/rCLAMPS/STAMP/alignedLogos_NoyesGrps/logos_1/PK25011.1_NKKRGCHLK_415.pdf]

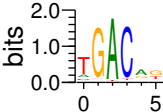

WebLogo 3.6.0

Supplement: SUPPLEMENTAL_Matl.zip [file PK25034.1_KGKLNINKR_416.pdf › SUPPLEMENTAL_Matl/rCLAMPS/STAMP/alignedLogos_NoyesGrps/logos_1/PK25034.1_KGKLNINKR_416.pdf]

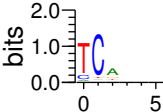

Supplement: SUPPLEMENTAL_Matl.zip [file PKNOX1_KNKRNINRR.pdf › SUPPLEMENTAL_Matl/rCLAMPS/STAMP/alignedLogos_NoyesGrps/logos_1/PKNOX1_KNKRNINRR.pdf]

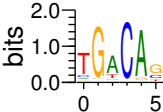

WebLogo 3.6.0

Supplement: SUPPLEMENTAL_Matl.zip [file PKNOX1_NKRGNINRR_417.pdf › SUPPLEMENTAL_Matl/rCLAMPS/STAMP/alignedLogos_NoyesGrps/logos_1/PKNOX1_NKRGNINRR_417.pdf]

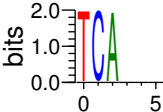

Supplement: SUPPLEMENTAL_Matl.zip [file PKNOX2_KNKRNINRR.pdf › SUPPLEMENTAL_Matl/rCLAMPS/STAMP/alignedLogos_NoyesGrps/logos_1/PKNOX2_KNKRNINRR.pdf]

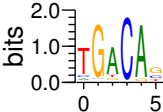

# WebLogo 3.6.0

Supplement: SUPPLEMENTAL_Matl.zip [file PKNOX2_NKRGNINRR_418.pdf › SUPPLEMENTAL_Matl/rCLAMPS/STAMP/alignedLogos_NoyesGrps/logos_1/PKNOX2_NKRGNINRR_418.pdf]

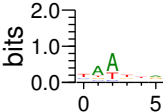

WebLogo 3.6.0

Supplement: SUPPLEMENTAL_Matl.zip [file POU5F1B_KRKRVCNQK.pdf › SUPPLEMENTAL_Matl/rCLAMPS/STAMP/alignedLogos_NoyesGrps/logos_1/POU5F1B_KRKRVCNQK.pdf]



WebLogo 3.6.0

Supplement: SUPPLEMENTAL_Matl.zip [file POU5F1B_KRKRVCNQK_419.pdf › SUPPLEMENTAL_Matl/rCLAMPS/STAMP/alignedLogos_NoyesGrps/logos_1/POU5F1B_KRKRVCNQK_419.pdf]

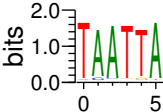

Supplement: SUPPLEMENTAL_Matl.zip [file POU6F1_RKRRVCNQT.pdf › SUPPLEMENTAL_Matl/rCLAMPS/STAMP/alignedLogos_NoyesGrps/logos_1/POU6F1_RKRRVCNQT.pdf]



WebLogo 3.6.0

Supplement: SUPPLEMENTAL_Matl.zip [file POU6F1_RKRRVCNQT_420.pdf › SUPPLEMENTAL_Matl/rCLAMPS/STAMP/alignedLogos_NoyesGrps/logos_1/POU6F1_RKRRVCNQT_420.pdf]

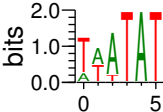

WebLogo 3.6.0

Supplement: SUPPLEMENTAL_Matl.zip [file PRH_PETCR_STSKNNNWS.pdf › SUPPLEMENTAL_Matl/rCLAMPS/STAMP/alignedLogos_NoyesGrps/logos_1/PRH_PETCR_STSKNNNWS.pdf]



WebLogo 3.6.0

Supplement: SUPPLEMENTAL_Matl.zip [file PRH_PETCR_STSKNNNWS_421.pdf › SUPPLEMENTAL_Matl/rCLAMPS/STAMP/alignedLogos_NoyesGrps/logos_1/PRH_PETCR_STSKNNNWS_421.pdf]

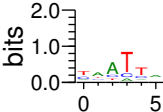

WebLogo 3.6.0

Supplement: SUPPLEMENTAL_Matl.zip [file PROP1_RRHRVQNAK.pdf › SUPPLEMENTAL_Matl/rCLAMPS/STAMP/alignedLogos_NoyesGrps/logos_1/PROP1_RRHRVQNAK.pdf]

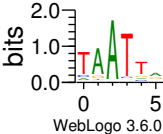

Supplement: SUPPLEMENTAL_Matl.zip [file PRRX1_RRNRVQNAK.pdf › SUPPLEMENTAL_Matl/rCLAMPS/STAMP/alignedLogos_NoyesGrps/logos_1/PRRX1_RRNRVQNAK.pdf]

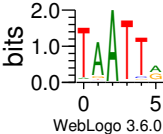

Supplement: SUPPLEMENTAL_Matl.zip [file PRRX1_RRNRVQNAK_422.pdf › SUPPLEMENTAL_Matl/rCLAMPS/STAMP/alignedLogos_NoyesGrps/logos_1/PRRX1_RRNRVQNAK_422.pdf]

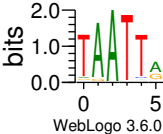

Supplement: SUPPLEMENTAL_Matl.zip [file PRRX2_RRNRVQNAK.pdf › SUPPLEMENTAL_Matl/rCLAMPS/STAMP/alignedLogos_NoyesGrps/logos_1/PRRX2_RRNRVQNAK.pdf]

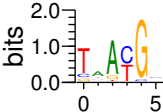

WebLogo 3.6.0

Supplement: SUPPLEMENTAL_Matl.zip [file PRRX2_RRNRVQNAK_423.pdf › SUPPLEMENTAL_Matl/rCLAMPS/STAMP/alignedLogos_NoyesGrps/logos_1/PRRX2_RRNRVQNAK_423.pdf]

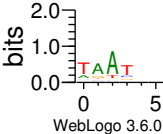

Supplement: SUPPLEMENTAL_Matl.zip [file Pdx1_KRTRIQNMK_424.pdf › SUPPLEMENTAL_Matl/rCLAMPS/STAMP/alignedLogos_NoyesGrps/logos_1/Pdx1_KRTRIQNMK_424.pdf]

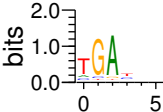

Supplement: SUPPLEMENTAL_Matl.zip [file Phyra73700_TLHPNTNKR_425.pdf › SUPPLEMENTAL_Matl/rCLAMPS/STAMP/alignedLogos_NoyesGrps/logos_1/Phyra73700_TLHPNTNKR_425.pdf]



Supplement: SUPPLEMENTAL_Matl.zip [file Phyra73700_TRRGNTNKR.pdf › SUPPLEMENTAL_Matl/rCLAMPS/STAMP/alignedLogos_NoyesGrps/logos_1/Phyra73700_TRRGNTNKR.pdf]



Supplement: SUPPLEMENTAL_Matl.zip [file Pknox1_NKRGNINRR_426.pdf › SUPPLEMENTAL_Matl/rCLAMPS/STAMP/alignedLogos_NoyesGrps/logos_1/Pknox1_NKRGNINRR_426.pdf]

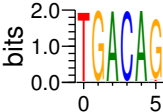

WebLogo 3.6.0

Supplement: SUPPLEMENTAL_Matl.zip [file Pknox2_NKRGNINRR_427.pdf › SUPPLEMENTAL_Matl/rCLAMPS/STAMP/alignedLogos_NoyesGrps/logos_1/Pknox2_NKRGNINRR_427.pdf]

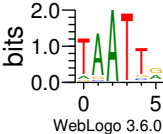

Supplement: SUPPLEMENTAL_Matl.zip [file Pph13_RRYRVQNAK.pdf › SUPPLEMENTAL_Matl/rCLAMPS/STAMP/alignedLogos_NoyesGrps/logos_1/Pph13_RRYRVQNAK.pdf]



Supplement: SUPPLEMENTAL_Matl.zip [file Prrx1_RRNRVQNAK_428.pdf › SUPPLEMENTAL_Matl/rCLAMPS/STAMP/alignedLogos_NoyesGrps/logos_1/Prrx1_RRNRVQNAK_428.pdf]

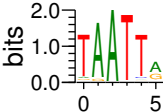

WebLogo 3.6.0

Supplement: SUPPLEMENTAL_Matl.zip [file Prrx2_RRNRVQNAK_429.pdf › SUPPLEMENTAL_Matl/rCLAMPS/STAMP/alignedLogos_NoyesGrps/logos_1/Prrx2_RRNRVQNAK_429.pdf]

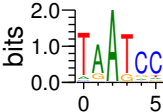

WebLogo 3.6.0

Supplement: SUPPLEMENTAL_Matl.zip [file Ptx1_RRQRVKNAK.pdf › SUPPLEMENTAL_Matl/rCLAMPS/STAMP/alignedLogos_NoyesGrps/logos_1/Ptx1_RRQRVKNAK.pdf]

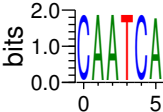

WebLogo 3.6.0

Supplement: SUPPLEMENTAL_Matl.zip [file Q00352_COPCI_PSKKVQNRR.pdf › SUPPLEMENTAL_Matl/rCLAMPS/STAMP/alignedLogos_NoyesGrps/logos_1/Q00352_COPCI_PSKKVQNRR.pdf]



WebLogo 3.6.0

Supplement: SUPPLEMENTAL_Matl.zip [file Q00352_COPCI_PSKKVQNRR_430.pdf › SUPPLEMENTAL_Matl/rCLAMPS/STAMP/alignedLogos_NoyesGrps/logos_1/Q00352_COPCI_PSKKVQNRR_430.pdf]

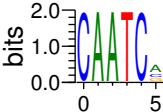

WebLogo 3.6.0

Supplement: SUPPLEMENTAL_Matl.zip [file Q00354_COPCI_EVKRVQNRR.pdf › SUPPLEMENTAL_Matl/rCLAMPS/STAMP/alignedLogos_NoyesGrps/logos_1/Q00354_COPCI_EVKRVQNRR.pdf]



WebLogo 3.6.0

Supplement: SUPPLEMENTAL_Matl.zip [file Q00354_COPCI_EVKRVQNRR_431.pdf › SUPPLEMENTAL_Matl/rCLAMPS/STAMP/alignedLogos_NoyesGrps/logos_1/Q00354_COPCI_EVKRVQNRR_431.pdf]

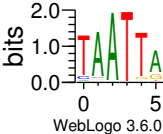

Supplement: SUPPLEMENTAL_Matl.zip [file Q0N4F9_NEMVE_RRCRVQNAK.pdf › SUPPLEMENTAL_Matl/rCLAMPS/STAMP/alignedLogos_NoyesGrps/logos_1/Q0N4F9_NEMVE_RRCRVQNAK.pdf]



Supplement: SUPPLEMENTAL_Matl.zip [file Q0N4F9_NEMVE_RRCRVQNAK_432.pdf › SUPPLEMENTAL_Matl/rCLAMPS/STAMP/alignedLogos_NoyesGrps/logos_1/Q0N4F9_NEMVE_RRCRVQNAK_432.pdf]

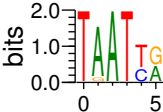

WebLogo 3.6.0

Supplement: SUPPLEMENTAL_Matl.zip [file Q0N4H2_NEMVE_TTTRTQNMK.pdf › SUPPLEMENTAL_Matl/rCLAMPS/STAMP/alignedLogos_NoyesGrps/logos_1/Q0N4H2_NEMVE_TTTRTQNMK.pdf]



WebLogo 3.6.0

Supplement: SUPPLEMENTAL_Matl.zip [file Q0N4H2_NEMVE_TTTRTQNMK_433.pdf › SUPPLEMENTAL_Matl/rCLAMPS/STAMP/alignedLogos_NoyesGrps/logos_1/Q0N4H2_NEMVE_TTTRTQNMK_433.pdf]

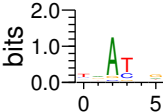

WebLogo 3.6.0

Supplement: SUPPLEMENTAL_Matl.zip [file Q0N4H7_NEMVE_KPRRNQNMK.pdf › SUPPLEMENTAL_Matl/rCLAMPS/STAMP/alignedLogos_NoyesGrps/logos_1/Q0N4H7_NEMVE_KPRRNQNMK.pdf]



WebLogo 3.6.0

Supplement: SUPPLEMENTAL_Matl.zip [file Q0N4H7_NEMVE_KPRRNQNMK_434.pdf › SUPPLEMENTAL_Matl/rCLAMPS/STAMP/alignedLogos_NoyesGrps/logos_1/Q0N4H7_NEMVE_KPRRNQNMK_434.pdf]

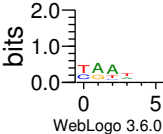

Supplement: SUPPLEMENTAL_Matl.zip [file Q0N4H9_NEMVE_TKLRTQNTK.pdf › SUPPLEMENTAL_Matl/rCLAMPS/STAMP/alignedLogos_NoyesGrps/logos_1/Q0N4H9_NEMVE_TKLRTQNTK.pdf]



Supplement: SUPPLEMENTAL_Matl.zip [file Q0N4H9_NEMVE_TKLRTQNTK_435.pdf › SUPPLEMENTAL_Matl/rCLAMPS/STAMP/alignedLogos_NoyesGrps/logos_1/Q0N4H9_NEMVE_TKLRTQNTK_435.pdf]

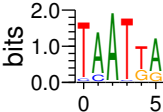

Supplement: SUPPLEMENTAL_Matl.zip [file Q0N4M8_NEMVE_KRKRIQNMK.pdf › SUPPLEMENTAL_Matl/rCLAMPS/STAMP/alignedLogos_NoyesGrps/logos_1/Q0N4M8_NEMVE_KRKRIQNMK.pdf]



Supplement: SUPPLEMENTAL_Matl.zip [file Q0N4M8_NEMVE_KRKRIQNMK_436.pdf › SUPPLEMENTAL_Matl/rCLAMPS/STAMP/alignedLogos_NoyesGrps/logos_1/Q0N4M8_NEMVE_KRKRIQNMK_436.pdf]
