# Supplementary figures and images for: Learning probabilistic protein–DNA recognition codes from DNA-binding specificities using structural mappings (part 23 of 25)
Source: HighWire-hosted journal article supplement (doi:10.1101/gr.276606.122), 2022-09-01

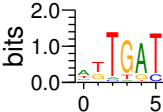

WebLogo 3.7.1

Supplement: SUPPLEMENTAL_Matl.zip [file Pbx2_cisbp.pdf › pairlogos/Pbx2_cisbp.pdf]

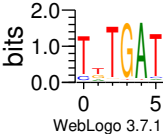

Supplement: SUPPLEMENTAL_Matl.zip [file Pbx2_predicted.pdf › pairlogos/Pbx2_predicted.pdf]

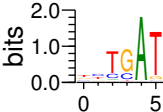

WebLogo 3.7.1

Supplement: SUPPLEMENTAL_Matl.zip [file Pbx3_cisbp.pdf › pairlogos/Pbx3_cisbp.pdf]



Supplement: SUPPLEMENTAL_Matl.zip [file Pbx3_predicted.pdf › pairlogos/Pbx3_predicted.pdf]

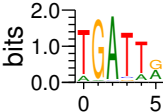

WebLogo 3.7.1

Supplement: SUPPLEMENTAL_Matl.zip [file Pdx1_cisbp.pdf › pairlogos/Pdx1_cisbp.pdf]

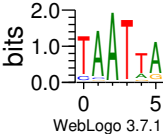

Supplement: SUPPLEMENTAL_Matl.zip [file Pdx1_predicted.pdf › pairlogos/Pdx1_predicted.pdf]

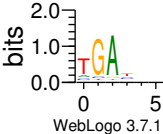

Supplement: SUPPLEMENTAL_Matl.zip [file Phyra73700_cisbp.pdf › pairlogos/Phyra73700_cisbp.pdf]

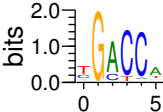

WebLogo 3.7.1

Supplement: SUPPLEMENTAL_Matl.zip [file Phyra73700_predicted.pdf › pairlogos/Phyra73700_predicted.pdf]

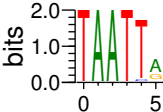

WebLogo 3.7.1

Supplement: SUPPLEMENTAL_Matl.zip [file Pph13_cisbp.pdf › pairlogos/Pph13_cisbp.pdf]

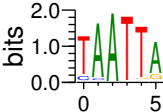

WebLogo 3.7.1

Supplement: SUPPLEMENTAL_Matl.zip [file Pph13_predicted.pdf › pairlogos/Pph13_predicted.pdf]

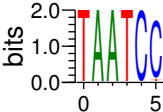

WebLogo 3.7.1

Supplement: SUPPLEMENTAL_Matl.zip [file Ptx1_cisbp.pdf › pairlogos/Ptx1_cisbp.pdf]

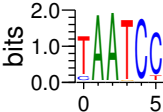

WebLogo 3.7.1

Supplement: SUPPLEMENTAL_Matl.zip [file Ptx1_predicted.pdf › pairlogos/Ptx1_predicted.pdf]

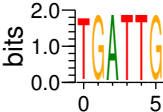

WebLogo 3.7.1

Supplement: SUPPLEMENTAL_Matl.zip [file Q00352_COPCI_cisbp.pdf › pairlogos/Q00352_COPCI_cisbp.pdf]

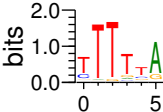

WebLogo 3.7.1

Supplement: SUPPLEMENTAL_Matl.zip [file Q00352_COPCI_predicted.pdf › pairlogos/Q00352_COPCI_predicted.pdf]

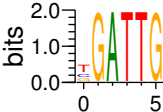

WebLogo 3.7.1

Supplement: SUPPLEMENTAL_Matl.zip [file Q00354_COPCI_cisbp.pdf › pairlogos/Q00354_COPCI_cisbp.pdf]

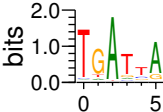

WebLogo 3.7.1

Supplement: SUPPLEMENTAL_Matl.zip [file Q00354_COPCI_predicted.pdf › pairlogos/Q00354_COPCI_predicted.pdf]

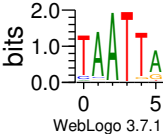

Supplement: SUPPLEMENTAL_Matl.zip [file Q0N4F9_NEMVE_cisbp.pdf › pairlogos/Q0N4F9_NEMVE_cisbp.pdf]

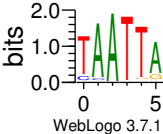

Supplement: SUPPLEMENTAL_Matl.zip [file Q0N4F9_NEMVE_predicted.pdf › pairlogos/Q0N4F9_NEMVE_predicted.pdf]

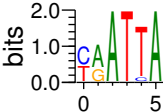

WebLogo 3.7.1

Supplement: SUPPLEMENTAL_Matl.zip [file Q0N4H2_NEMVE_cisbp.pdf › pairlogos/Q0N4H2_NEMVE_cisbp.pdf]

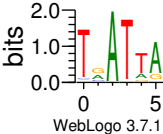

Supplement: SUPPLEMENTAL_Matl.zip [file Q0N4H2_NEMVE_predicted.pdf › pairlogos/Q0N4H2_NEMVE_predicted.pdf]

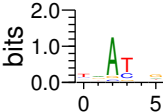

WebLogo 3.7.1

Supplement: SUPPLEMENTAL_Matl.zip [file Q0N4H7_NEMVE_cisbp.pdf › pairlogos/Q0N4H7_NEMVE_cisbp.pdf]

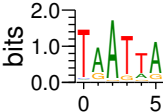

Supplement: SUPPLEMENTAL_Matl.zip [file Q0N4H7_NEMVE_predicted.pdf › pairlogos/Q0N4H7_NEMVE_predicted.pdf]

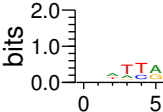

WebLogo 3.7.1

Supplement: SUPPLEMENTAL_Matl.zip [file Q0N4H9_NEMVE_cisbp.pdf › pairlogos/Q0N4H9_NEMVE_cisbp.pdf]

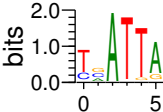

WebLogo 3.7.1

Supplement: SUPPLEMENTAL_Matl.zip [file Q0N4H9_NEMVE_predicted.pdf › pairlogos/Q0N4H9_NEMVE_predicted.pdf]

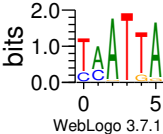

Supplement: SUPPLEMENTAL_Matl.zip [file Q0N4M8_NEMVE_cisbp.pdf › pairlogos/Q0N4M8_NEMVE_cisbp.pdf]

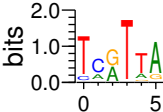

WebLogo 3.7.1

Supplement: SUPPLEMENTAL_Matl.zip [file Q0N4M8_NEMVE_predicted.pdf › pairlogos/Q0N4M8_NEMVE_predicted.pdf]

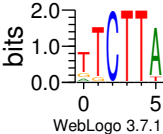

Supplement: SUPPLEMENTAL_Matl.zip [file Q0ZPQ4_NEMVE_cisbp.pdf › pairlogos/Q0ZPQ4_NEMVE_cisbp.pdf]

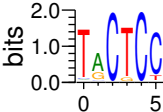

WebLogo 3.7.1

Supplement: SUPPLEMENTAL_Matl.zip [file Q0ZPQ4_NEMVE_predicted.pdf › pairlogos/Q0ZPQ4_NEMVE_predicted.pdf]

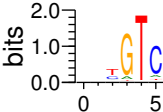

WebLogo 3.7.1

Supplement: SUPPLEMENTAL_Matl.zip [file Q0ZPQ8_NEMVE_cisbp.pdf › pairlogos/Q0ZPQ8_NEMVE_cisbp.pdf]

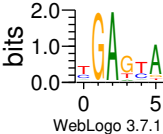

Supplement: SUPPLEMENTAL_Matl.zip [file Q0ZPQ8_NEMVE_predicted.pdf › pairlogos/Q0ZPQ8_NEMVE_predicted.pdf]

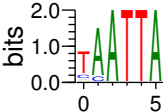

WebLogo 3.7.1

Supplement: SUPPLEMENTAL_Matl.zip [file Q24780_9CNID_cisbp.pdf › pairlogos/Q24780_9CNID_cisbp.pdf]

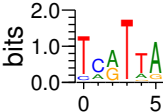

WebLogo 3.7.1

Supplement: SUPPLEMENTAL_Matl.zip [file Q24780_9CNID_predicted.pdf › pairlogos/Q24780_9CNID_predicted.pdf]

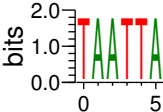

WebLogo 3.7.1

Supplement: SUPPLEMENTAL_Matl.zip [file Q24782_9CNID_cisbp.pdf › pairlogos/Q24782_9CNID_cisbp.pdf]

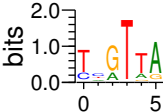

WebLogo 3.7.1

Supplement: SUPPLEMENTAL_Matl.zip [file Q24782_9CNID_predicted.pdf › pairlogos/Q24782_9CNID_predicted.pdf]

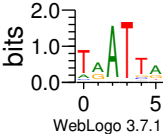

Supplement: SUPPLEMENTAL_Matl.zip [file Q4RRY4_TETNG_cisbp.pdf › pairlogos/Q4RRY4_TETNG_cisbp.pdf]

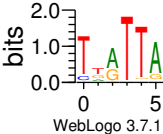

Supplement: SUPPLEMENTAL_Matl.zip [file Q4RRY4_TETNG_predicted.pdf › pairlogos/Q4RRY4_TETNG_predicted.pdf]

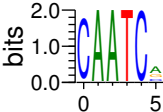

WebLogo 3.7.1

Supplement: SUPPLEMENTAL_Matl.zip [file Q68SS9_PLEDJ_cisbp.pdf › pairlogos/Q68SS9_PLEDJ_cisbp.pdf]

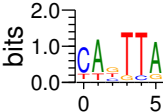

WebLogo 3.7.1

Supplement: SUPPLEMENTAL_Matl.zip [file Q68SS9_PLEDJ_predicted.pdf › pairlogos/Q68SS9_PLEDJ_predicted.pdf]

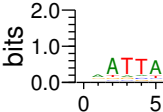

WebLogo 3.7.1

Supplement: SUPPLEMENTAL_Matl.zip [file Q6WL90_TRICY_cisbp.pdf › pairlogos/Q6WL90_TRICY_cisbp.pdf]

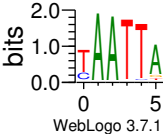

Supplement: SUPPLEMENTAL_Matl.zip [file Q6WL90_TRICY_predicted.pdf › pairlogos/Q6WL90_TRICY_predicted.pdf]

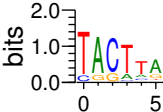

WebLogo 3.7.1

Supplement: SUPPLEMENTAL_Matl.zip [file Q70HR3_PLEPI_cisbp.pdf › pairlogos/Q70HR3_PLEPI_cisbp.pdf]

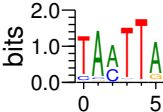

WebLogo 3.7.1

Supplement: SUPPLEMENTAL_Matl.zip [file Q70HR3_PLEPI_predicted.pdf › pairlogos/Q70HR3_PLEPI_predicted.pdf]

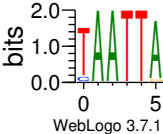

Supplement: SUPPLEMENTAL_Matl.zip [file Q70LF3_ARTSF_cisbp.pdf › pairlogos/Q70LF3_ARTSF_cisbp.pdf]

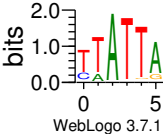

Supplement: SUPPLEMENTAL_Matl.zip [file Q70LF3_ARTSF_predicted.pdf › pairlogos/Q70LF3_ARTSF_predicted.pdf]

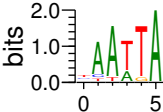

WebLogo 3.7.1

Supplement: SUPPLEMENTAL_Matl.zip [file Q7M3U4_ACRFO_cisbp.pdf › pairlogos/Q7M3U4_ACRFO_cisbp.pdf]

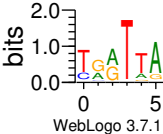

Supplement: SUPPLEMENTAL_Matl.zip [file Q7M3U4_ACRFO_predicted.pdf › pairlogos/Q7M3U4_ACRFO_predicted.pdf]

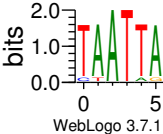

Supplement: SUPPLEMENTAL_Matl.zip [file Q86SD7_PODCA_cisbp.pdf › pairlogos/Q86SD7_PODCA_cisbp.pdf]

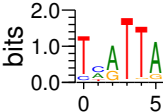

WebLogo 3.7.1

Supplement: SUPPLEMENTAL_Matl.zip [file Q86SD7_PODCA_predicted.pdf › pairlogos/Q86SD7_PODCA_predicted.pdf]

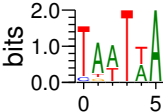

Supplement: SUPPLEMENTAL_Matl.zip [file Q8I9J5_9BILA_cisbp.pdf › pairlogos/Q8I9J5_9BILA_cisbp.pdf]

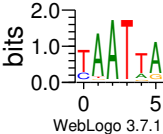

Supplement: SUPPLEMENTAL_Matl.zip [file Q8I9J5_9BILA_predicted.pdf › pairlogos/Q8I9J5_9BILA_predicted.pdf]

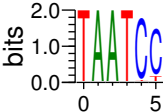

WebLogo 3.7.1

Supplement: SUPPLEMENTAL_Matl.zip [file Q8VHG7_MOUSE_cisbp.pdf › pairlogos/Q8VHG7_MOUSE_cisbp.pdf]

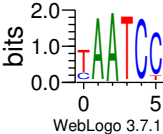

Supplement: SUPPLEMENTAL_Matl.zip [file Q8VHG7_MOUSE_predicted.pdf › pairlogos/Q8VHG7_MOUSE_predicted.pdf]

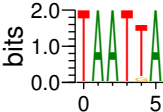

WebLogo 3.7.1

Supplement: SUPPLEMENTAL_Matl.zip [file Q9BJW6_9CNID_cisbp.pdf › pairlogos/Q9BJW6_9CNID_cisbp.pdf]

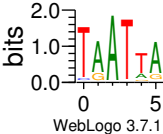

Supplement: SUPPLEMENTAL_Matl.zip [file Q9BJW6_9CNID_predicted.pdf › pairlogos/Q9BJW6_9CNID_predicted.pdf]

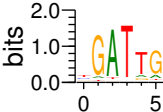

WebLogo 3.7.1

Supplement: SUPPLEMENTAL_Matl.zip [file Q9C1N5_COPSC_cisbp.pdf › pairlogos/Q9C1N5_COPSC_cisbp.pdf]

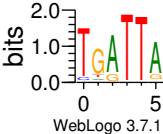

Supplement: SUPPLEMENTAL_Matl.zip [file Q9C1N5_COPSC_predicted.pdf › pairlogos/Q9C1N5_COPSC_predicted.pdf]

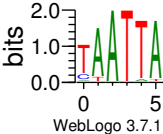

Supplement: SUPPLEMENTAL_Matl.zip [file Q9GP48_9TURB_cisbp.pdf › pairlogos/Q9GP48_9TURB_cisbp.pdf]



Supplement: SUPPLEMENTAL_Matl.zip [file Q9GP48_9TURB_predicted.pdf › pairlogos/Q9GP48_9TURB_predicted.pdf]

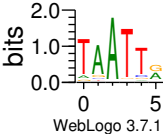

Supplement: SUPPLEMENTAL_Matl.zip [file RAX2_cisbp.pdf › pairlogos/RAX2_cisbp.pdf]

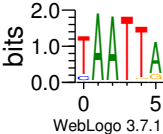

Supplement: SUPPLEMENTAL_Matl.zip [file RAX2_predicted.pdf › pairlogos/RAX2_predicted.pdf]

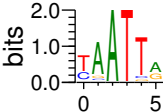

WebLogo 3.7.1

Supplement: SUPPLEMENTAL_Matl.zip [file RAX_cisbp.pdf › pairlogos/RAX_cisbp.pdf]



Supplement: SUPPLEMENTAL_Matl.zip [file RAX_predicted.pdf › pairlogos/RAX_predicted.pdf]

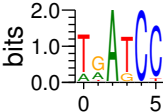

WebLogo 3.7.1

Supplement: SUPPLEMENTAL_Matl.zip [file RHOXF1_cisbp.pdf › pairlogos/RHOXF1_cisbp.pdf]

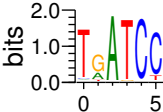

Supplement: SUPPLEMENTAL_Matl.zip [file RHOXF1_predicted.pdf › pairlogos/RHOXF1_predicted.pdf]

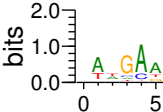

WebLogo 3.7.1

Supplement: SUPPLEMENTAL_Matl.zip [file RLT1_cisbp.pdf › pairlogos/RLT1_cisbp.pdf]

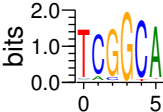

WebLogo 3.7.1

Supplement: SUPPLEMENTAL_Matl.zip [file RLT1_predicted.pdf › pairlogos/RLT1_predicted.pdf]

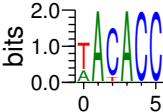

Supplement: SUPPLEMENTAL_Matl.zip [file Rhox8_cisbp.pdf › pairlogos/Rhox8_cisbp.pdf]

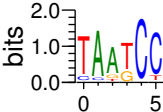

Supplement: SUPPLEMENTAL_Matl.zip [file Rhox8_predicted.pdf › pairlogos/Rhox8_predicted.pdf]

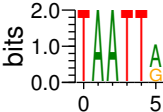

WebLogo 3.7.1

Supplement: SUPPLEMENTAL_Matl.zip [file Rx_cisbp.pdf › pairlogos/Rx_cisbp.pdf]



Supplement: SUPPLEMENTAL_Matl.zip [file Rx_predicted.pdf › pairlogos/Rx_predicted.pdf]

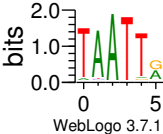

Supplement: SUPPLEMENTAL_Matl.zip [file SHOX2_cisbp.pdf › pairlogos/SHOX2_cisbp.pdf]

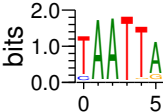

WebLogo 3.7.1

Supplement: SUPPLEMENTAL_Matl.zip [file SHOX2_predicted.pdf › pairlogos/SHOX2_predicted.pdf]

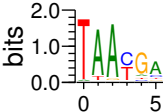

WebLogo 3.7.1

Supplement: SUPPLEMENTAL_Matl.zip [file SHOX_cisbp.pdf › pairlogos/SHOX_cisbp.pdf]

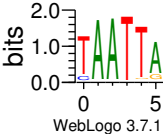

Supplement: SUPPLEMENTAL_Matl.zip [file SHOX_predicted.pdf › pairlogos/SHOX_predicted.pdf]

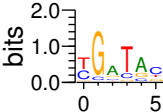

WebLogo 3.7.1

Supplement: SUPPLEMENTAL_Matl.zip [file SIX6_cisbp.pdf › pairlogos/SIX6_cisbp.pdf]

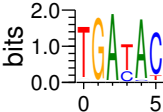

WebLogo 3.7.1

Supplement: SUPPLEMENTAL_Matl.zip [file SIX6_predicted.pdf › pairlogos/SIX6_predicted.pdf]

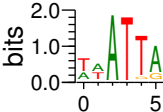

WebLogo 3.7.1

Supplement: SUPPLEMENTAL_Matl.zip [file SNAPOd2T00003340001_cisbp.pdf › pairlogos/SNAPOd2T00003340001_cisbp.pdf]

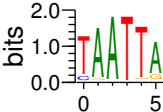

WebLogo 3.7.1

Supplement: SUPPLEMENTAL_Matl.zip [file SNAPOd2T00003340001_predicted.pdf › pairlogos/SNAPOd2T00003340001_predicted.pdf]

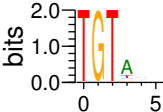

WebLogo 3.7.1

Supplement: SUPPLEMENTAL_Matl.zip [file SNAPOd2T00005194001_cisbp.pdf › pairlogos/SNAPOd2T00005194001_cisbp.pdf]

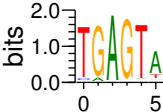

WebLogo 3.7.1

Supplement: SUPPLEMENTAL_Matl.zip [file SNAPOd2T00005194001_predicted.pdf › pairlogos/SNAPOd2T00005194001_predicted.pdf]

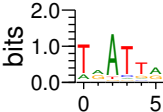

WebLogo 3.7.1

Supplement: SUPPLEMENTAL_Matl.zip [file SNAPOd2T00006145001_cisbp.pdf › pairlogos/SNAPOd2T00006145001_cisbp.pdf]

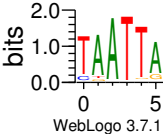

Supplement: SUPPLEMENTAL_Matl.zip [file SNAPOd2T00006145001_predicted.pdf › pairlogos/SNAPOd2T00006145001_predicted.pdf]

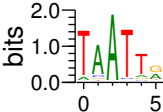

WebLogo 3.7.1

Supplement: SUPPLEMENTAL_Matl.zip [file SNAPOd2T00006620001_cisbp.pdf › pairlogos/SNAPOd2T00006620001_cisbp.pdf]



WebLogo 3.7.1

Supplement: SUPPLEMENTAL_Matl.zip [file SNAPOd2T00006620001_predicted.pdf › pairlogos/SNAPOd2T00006620001_predicted.pdf]

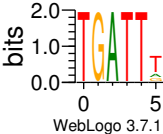

Supplement: SUPPLEMENTAL_Matl.zip [file SNOG_08903_cisbp.pdf › pairlogos/SNOG_08903_cisbp.pdf]

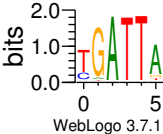

Supplement: SUPPLEMENTAL_Matl.zip [file SNOG_08903_predicted.pdf › pairlogos/SNOG_08903_predicted.pdf]

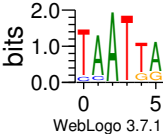

Supplement: SUPPLEMENTAL_Matl.zip [file SPU_026099_cisbp.pdf › pairlogos/SPU_026099_cisbp.pdf]



Supplement: SUPPLEMENTAL_Matl.zip [file SPU_026099_predicted.pdf › pairlogos/SPU_026099_predicted.pdf]

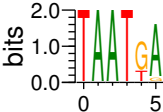

WebLogo 3.7.1

Supplement: SUPPLEMENTAL_Matl.zip [file Scr_cisbp.pdf › pairlogos/Scr_cisbp.pdf]

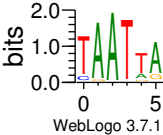

Supplement: SUPPLEMENTAL_Matl.zip [file Scr_predicted.pdf › pairlogos/Scr_predicted.pdf]

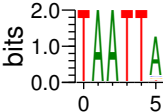

WebLogo 3.7.1

Supplement: SUPPLEMENTAL_Matl.zip [file Sebox_cisbp.pdf › pairlogos/Sebox_cisbp.pdf]

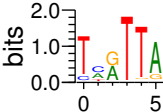

WebLogo 3.7.1

Supplement: SUPPLEMENTAL_Matl.zip [file Sebox_predicted.pdf › pairlogos/Sebox_predicted.pdf]

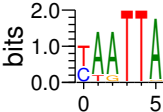

Supplement: SUPPLEMENTAL_Matl.zip [file Smp_158000_cisbp.pdf › pairlogos/Smp_158000_cisbp.pdf]

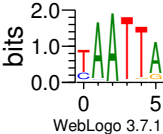

Supplement: SUPPLEMENTAL_Matl.zip [file Smp_158000_predicted.pdf › pairlogos/Smp_158000_predicted.pdf]

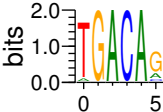

WebLogo 3.7.1

Supplement: SUPPLEMENTAL_Matl.zip [file TGIF1_cisbp.pdf › pairlogos/TGIF1_cisbp.pdf]

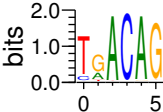

WebLogo 3.7.1

Supplement: SUPPLEMENTAL_Matl.zip [file TGIF1_predicted.pdf › pairlogos/TGIF1_predicted.pdf]

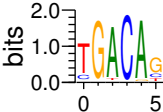

WebLogo 3.7.1

Supplement: SUPPLEMENTAL_Matl.zip [file TGIF2LX_cisbp.pdf › pairlogos/TGIF2LX_cisbp.pdf]

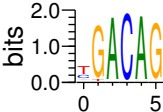

WebLogo 3.7.1

Supplement: SUPPLEMENTAL_Matl.zip [file TGIF2LX_predicted.pdf › pairlogos/TGIF2LX_predicted.pdf]

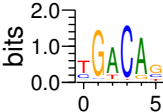

WebLogo 3.7.1

Supplement: SUPPLEMENTAL_Matl.zip [file TGIF2LY_cisbp.pdf › pairlogos/TGIF2LY_cisbp.pdf]



WebLogo 3.7.1

Supplement: SUPPLEMENTAL_Matl.zip [file TGIF2LY_predicted.pdf › pairlogos/TGIF2LY_predicted.pdf]
