# Supplementary figures and images for: Learning probabilistic protein–DNA recognition codes from DNA-binding specificities using structural mappings (part 19 of 25)
Source: HighWire-hosted journal article supplement (doi:10.1101/gr.276606.122), 2022-09-01

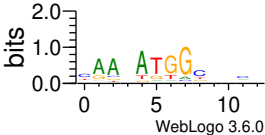

Supplement: SUPPLEMENTAL_Matl.zip [file pho_DSAKESKRLFNTQTNS_251.pdf › SUPPLEMENTAL_Matl/rCLAMPS/my_results/zf-C2H2_250_50_seedFFSdiverse6/0_logos_predicted_hoo/pho_DSAKESKRLFNTQTNS_251.pdf]

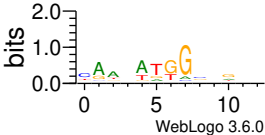

Supplement: SUPPLEMENTAL_Matl.zip [file phol_NSAKESKRLFNTQTNS_252.pdf › SUPPLEMENTAL_Matl/rCLAMPS/my_results/zf-C2H2_250_50_seedFFSdiverse6/0_logos_predicted_hoo/phol_NSAKESKRLFNTQTNS_252.pdf]

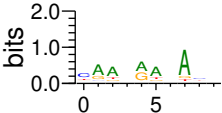

WebLogo 3.6.0

Supplement: SUPPLEMENTAL_Matl.zip [file rn_NSYQQSHQQSNS_253.pdf › SUPPLEMENTAL_Matl/rCLAMPS/my_results/zf-C2H2_250_50_seedFFSdiverse6/0_logos_predicted_hoo/rn_NSYQQSHQQSNS_253.pdf]

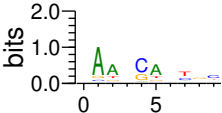

WebLogo 3.6.0

Supplement: SUPPLEMENTAL_Matl.zip [file sens_RSTTQSDKQSNT_254.pdf › SUPPLEMENTAL_Matl/rCLAMPS/my_results/zf-C2H2_250_50_seedFFSdiverse6/0_logos_predicted_hoo/sens_RSTTQSDKQSNT_254.pdf]

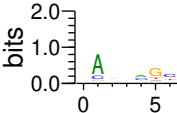

WebLogo 3.6.0

Supplement: SUPPLEMENTAL_Matl.zip [file shn-F1-2_KSVKTSNK_255.pdf › SUPPLEMENTAL_Matl/rCLAMPS/my_results/zf-C2H2_250_50_seedFFSdiverse6/0_logos_predicted_hoo/shn-F1-2_KSVKTSNK_255.pdf]



WebLogo 3.6.0

Supplement: SUPPLEMENTAL_Matl.zip [file sqz_NSYQQSHQQSNS_256.pdf › SUPPLEMENTAL_Matl/rCLAMPS/my_results/zf-C2H2_250_50_seedFFSdiverse6/0_logos_predicted_hoo/sqz_NSYQQSHQQSNS_256.pdf]

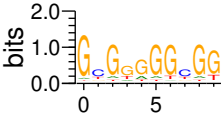

WebLogo 3.6.0

Supplement: SUPPLEMENTAL_Matl.zip [file sr_RDERRDHTRDER_257.pdf › SUPPLEMENTAL_Matl/rCLAMPS/my_results/zf-C2H2_250_50_seedFFSdiverse6/0_logos_predicted_hoo/sr_RDERRDHTRDER_257.pdf]

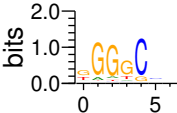

WebLogo 3.6.0

Supplement: SUPPLEMENTAL_Matl.zip [file vfl_HTDRRDHK_258.pdf › SUPPLEMENTAL_Matl/rCLAMPS/my_results/zf-C2H2_250_50_seedFFSdiverse6/0_logos_predicted_hoo/vfl_HTDRRDHK_258.pdf]

Improvement in log likelihood above random

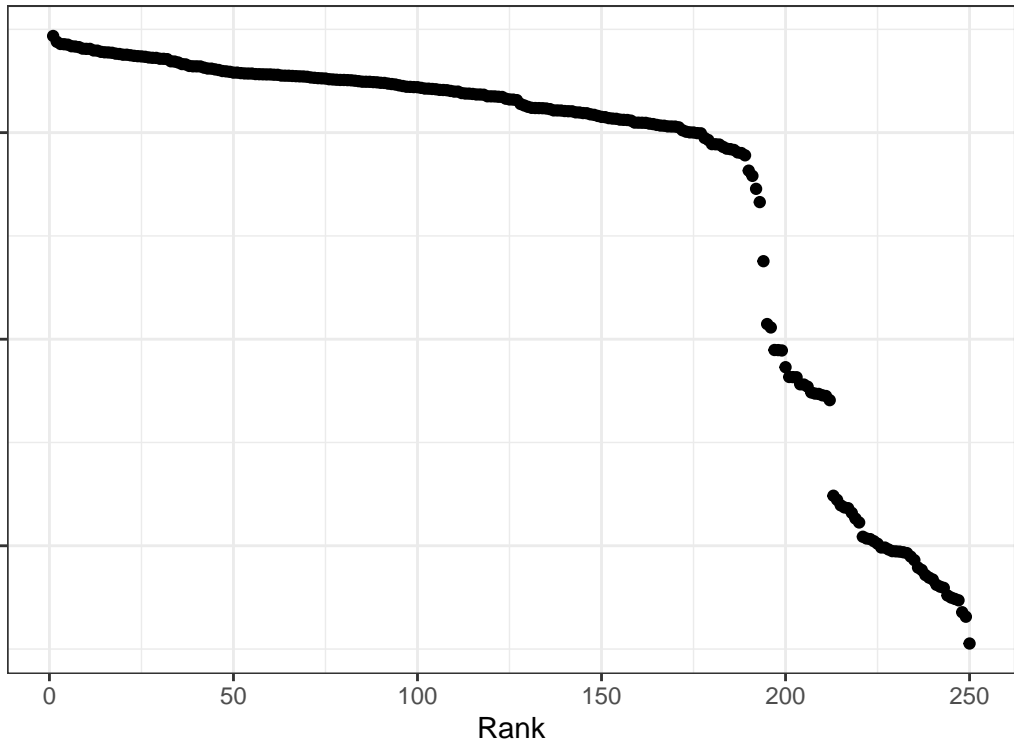

Supplement: SUPPLEMENTAL_Matl.zip [file modelImprovementAboveRandom.pdf › SUPPLEMENTAL_Matl/rCLAMPS/my_results/zf-C2H2_250_50_seedFFSdiverse6/modelImprovementAboveRandom.pdf]

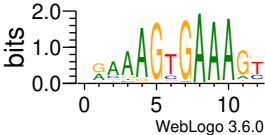

Supplement: SUPPLEMENTAL_Matl.zip [file Blimp-1_QSNVQAHKSSNTQVHL_0.pdf › SUPPLEMENTAL_Matl/rCLAMPS/my_results/zf-C2H2_250_50_seedFFSdiverse6/plots/0_logos_aligned/Blimp-1_QSNVQAHKSSNTQVHL_0.pdf]

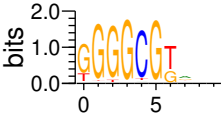

Supplement: SUPPLEMENTAL_Matl.zip [file Bteb2_KAHARDERRDHK_1.pdf › SUPPLEMENTAL_Matl/rCLAMPS/my_results/zf-C2H2_250_50_seedFFSdiverse6/plots/0_logos_aligned/Bteb2_KAHARDERRDHK_1.pdf]

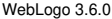

Supplement: SUPPLEMENTAL_Matl.zip [file CG10267_YSVSYHSKLHHQ_2.pdf › SUPPLEMENTAL_Matl/rCLAMPS/my_results/zf-C2H2_250_50_seedFFSdiverse6/plots/0_logos_aligned/CG10267_YSVSYHSKLHHQ_2.pdf]

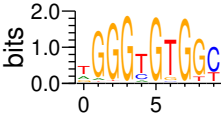

WebLogo 3.6.0

Supplement: SUPPLEMENTAL_Matl.zip [file CG12029_KSHARDERRDHL_3.pdf › SUPPLEMENTAL_Matl/rCLAMPS/my_results/zf-C2H2_250_50_seedFFSdiverse6/plots/0_logos_aligned/CG12029_KSHARDERRDHL_3.pdf]

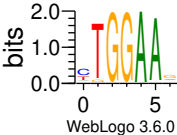

Supplement: SUPPLEMENTAL_Matl.zip [file CG12236-PB_TVNRNYSE_5.pdf › SUPPLEMENTAL_Matl/rCLAMPS/my_results/zf-C2H2_250_50_seedFFSdiverse6/plots/0_logos_aligned/CG12236-PB_TVNRNYSE_5.pdf]

Fraction of columns with  $\text{PCC} \geq x$

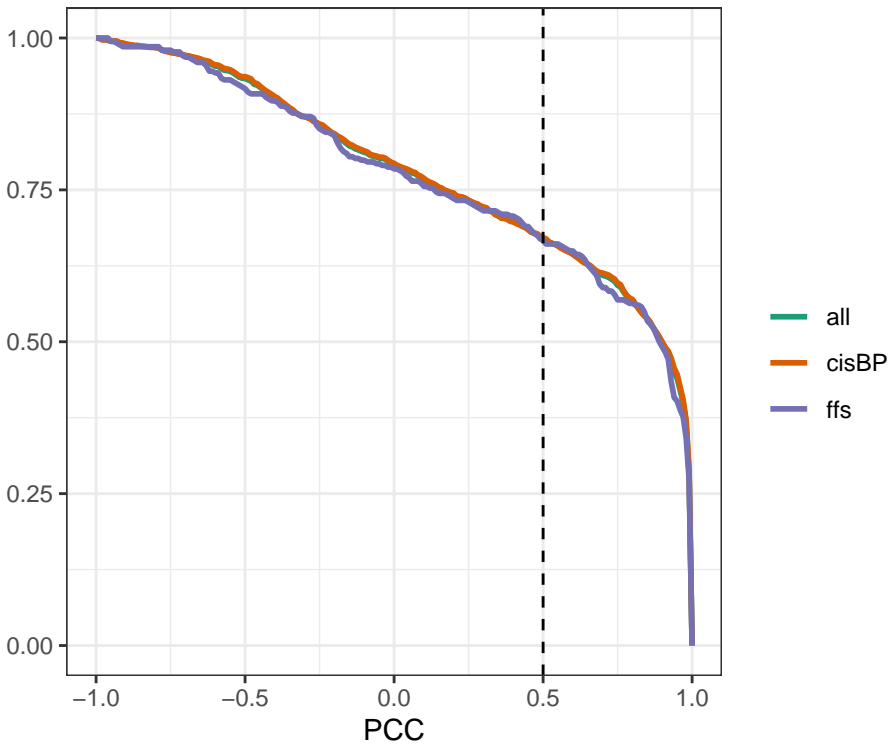

Supplement: SUPPLEMENTAL_Matl.zip [file Figure2_left.pdf › SUPPLEMENTAL_Matl/rCLAMPS/my_results/zf-C2H2_250_50_seedFFSdiverse6/plots/Figure2_left.pdf]

Fraction of columns with  $\text{PCC} \geq x$

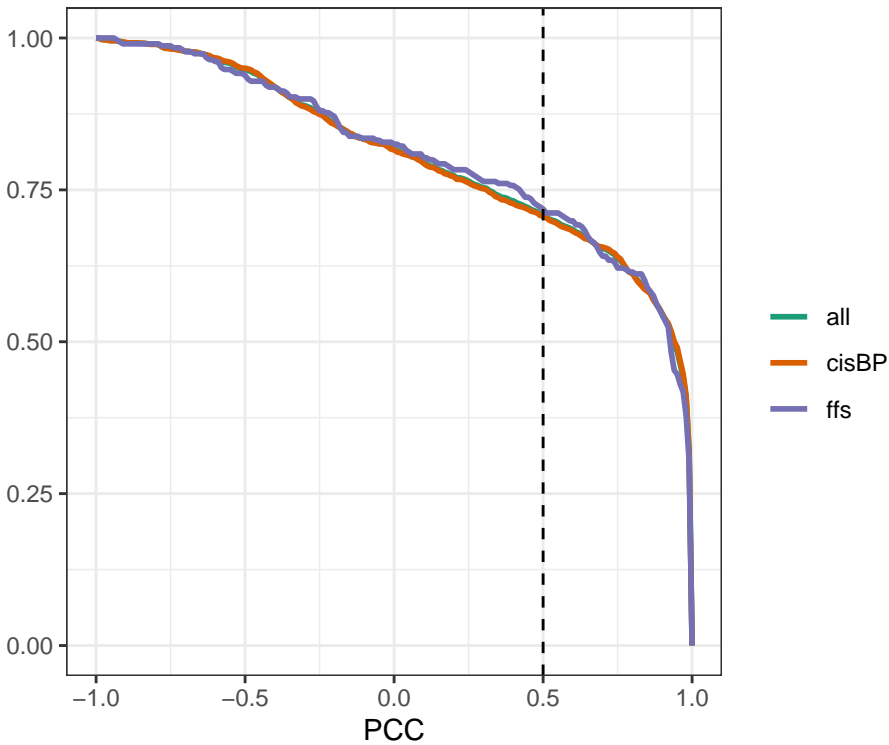

Supplement: SUPPLEMENTAL_Matl.zip [file Figure2_left_trimIC_0.25.pdf › SUPPLEMENTAL_Matl/rCLAMPS/my_results/zf-C2H2_250_50_seedFFSdiverse6/plots/Figure2_left_trimIC_0.25.pdf]

Fraction of columns with  $\text{PCC} \geq x$

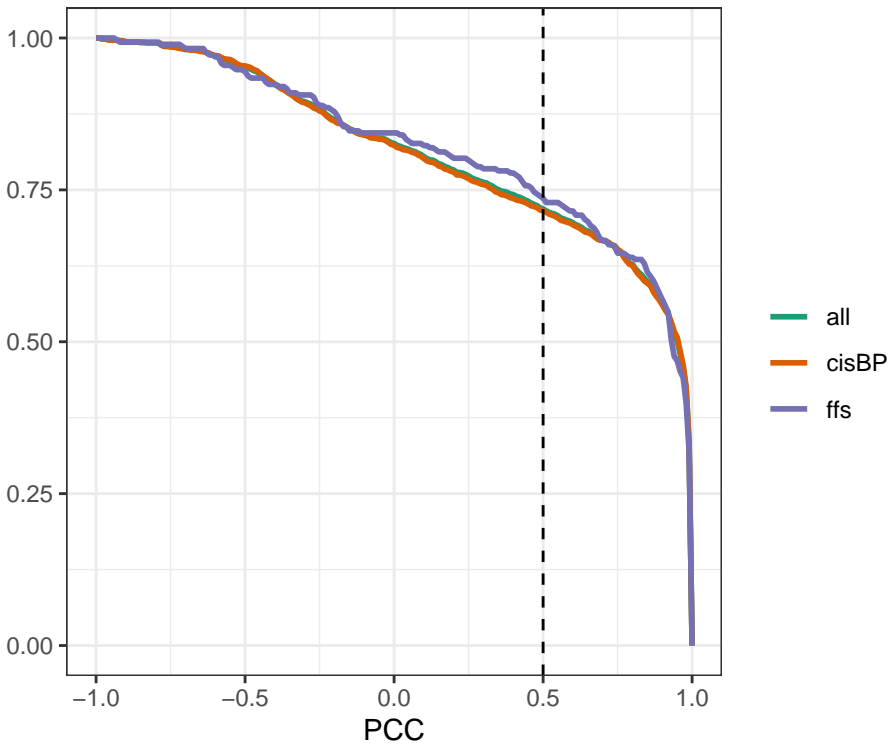

Supplement: SUPPLEMENTAL_Matl.zip [file Figure2_left_trimIC_0.4.pdf › SUPPLEMENTAL_Matl/rCLAMPS/my_results/zf-C2H2_250_50_seedFFSdiverse6/plots/Figure2_left_trimIC_0.4.pdf]

PCC between predicted and actual

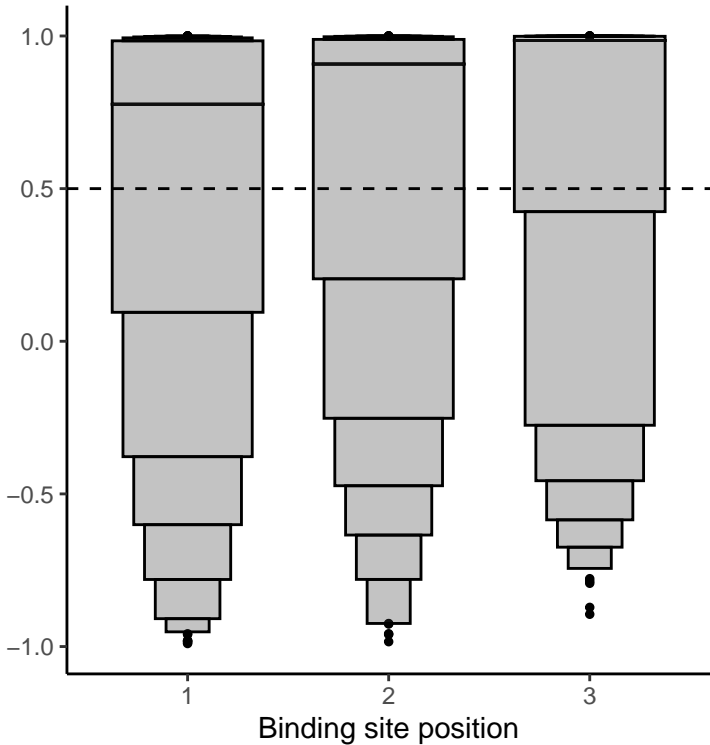

Supplement: SUPPLEMENTAL_Matl.zip [file Figure2_right.pdf › SUPPLEMENTAL_Matl/rCLAMPS/my_results/zf-C2H2_250_50_seedFFSdiverse6/plots/Figure2_right.pdf]

PCC between predicted and actual

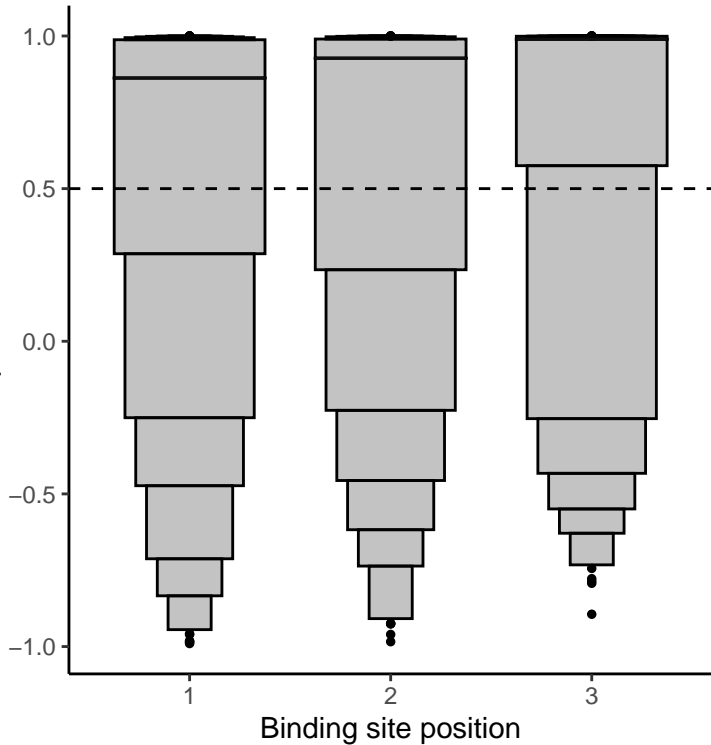

Supplement: SUPPLEMENTAL_Matl.zip [file Figure2_right_trimIC_0.25.pdf › SUPPLEMENTAL_Matl/rCLAMPS/my_results/zf-C2H2_250_50_seedFFSdiverse6/plots/Figure2_right_trimIC_0.25.pdf]

PCC between predicted and actual

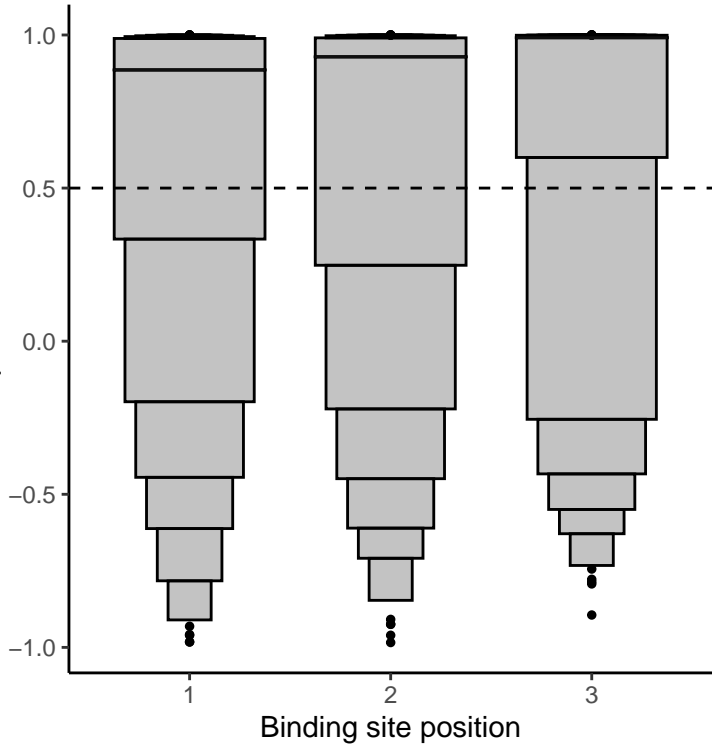

Supplement: SUPPLEMENTAL_Matl.zip [file Figure2_right_trimIC_0.4.pdf › SUPPLEMENTAL_Matl/rCLAMPS/my_results/zf-C2H2_250_50_seedFFSdiverse6/plots/Figure2_right_trimIC_0.4.pdf]

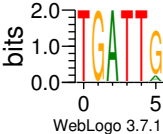

Supplement: SUPPLEMENTAL_Matl.zip [file A1JVI6_MOUSE_cisbp.pdf › pairlogos/A1JVI6_MOUSE_cisbp.pdf]

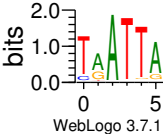

Supplement: SUPPLEMENTAL_Matl.zip [file A1JVI6_MOUSE_predicted.pdf › pairlogos/A1JVI6_MOUSE_predicted.pdf]

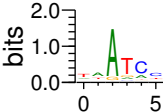

Supplement: SUPPLEMENTAL_Matl.zip [file AAEL012091_cisbp.pdf › pairlogos/AAEL012091_cisbp.pdf]

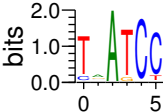

Supplement: SUPPLEMENTAL_Matl.zip [file AAEL012091_predicted.pdf › pairlogos/AAEL012091_predicted.pdf]

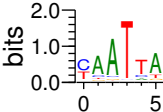

WebLogo 3.7.1

Supplement: SUPPLEMENTAL_Matl.zip [file AAZ08039_cisbp.pdf › pairlogos/AAZ08039_cisbp.pdf]

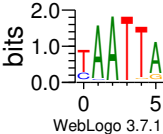

Supplement: SUPPLEMENTAL_Matl.zip [file AAZ08039_predicted.pdf › pairlogos/AAZ08039_predicted.pdf]

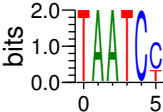

WebLogo 3.7.1

Supplement: SUPPLEMENTAL_Matl.zip [file AGAP006642_cisbp.pdf › pairlogos/AGAP006642_cisbp.pdf]

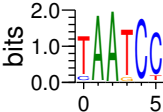

WebLogo 3.7.1

Supplement: SUPPLEMENTAL_Matl.zip [file AGAP006642_predicted.pdf › pairlogos/AGAP006642_predicted.pdf]

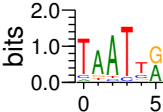

Supplement: SUPPLEMENTAL_Matl.zip [file ALX1_cisbp.pdf › pairlogos/ALX1_cisbp.pdf]

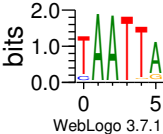

Supplement: SUPPLEMENTAL_Matl.zip [file ALX1_predicted.pdf › pairlogos/ALX1_predicted.pdf]

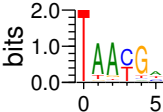

WebLogo 3.7.1

Supplement: SUPPLEMENTAL_Matl.zip [file ALX3_cisbp.pdf › pairlogos/ALX3_cisbp.pdf]

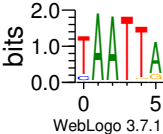

Supplement: SUPPLEMENTAL_Matl.zip [file ALX3_predicted.pdf › pairlogos/ALX3_predicted.pdf]

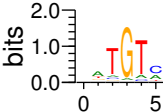

WebLogo 3.7.1

Supplement: SUPPLEMENTAL_Matl.zip [file ANIA_00885_cisbp.pdf › pairlogos/ANIA_00885_cisbp.pdf]

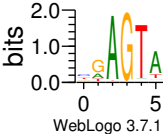

Supplement: SUPPLEMENTAL_Matl.zip [file ANIA_00885_predicted.pdf › pairlogos/ANIA_00885_predicted.pdf]

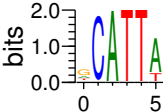

WebLogo 3.7.1

Supplement: SUPPLEMENTAL_Matl.zip [file ANL2_cisbp.pdf › pairlogos/ANL2_cisbp.pdf]

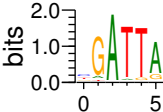

Supplement: SUPPLEMENTAL_Matl.zip [file ANL2_predicted.pdf › pairlogos/ANL2_predicted.pdf]

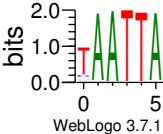

Supplement: SUPPLEMENTAL_Matl.zip [file ARGFX_cisbp.pdf › pairlogos/ARGFX_cisbp.pdf]

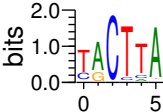

WebLogo 3.7.1

Supplement: SUPPLEMENTAL_Matl.zip [file ARGFX_predicted.pdf › pairlogos/ARGFX_predicted.pdf]

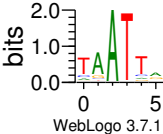

Supplement: SUPPLEMENTAL_Matl.zip [file ARX_cisbp.pdf › pairlogos/ARX_cisbp.pdf]

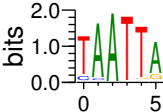

WebLogo 3.7.1

Supplement: SUPPLEMENTAL_Matl.zip [file ARX_predicted.pdf › pairlogos/ARX_predicted.pdf]

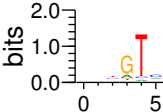

WebLogo 3.7.1

Supplement: SUPPLEMENTAL_Matl.zip [file ATEG_00670_cisbp.pdf › pairlogos/ATEG_00670_cisbp.pdf]

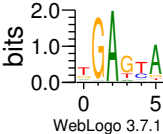

Supplement: SUPPLEMENTAL_Matl.zip [file ATEG_00670_predicted.pdf › pairlogos/ATEG_00670_predicted.pdf]

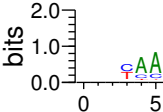

Supplement: SUPPLEMENTAL_Matl.zip [file ATEG_04171_cisbp.pdf › pairlogos/ATEG_04171_cisbp.pdf]

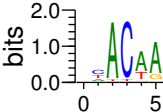

WebLogo 3.7.1

Supplement: SUPPLEMENTAL_Matl.zip [file ATEG_04171_predicted.pdf › pairlogos/ATEG_04171_predicted.pdf]

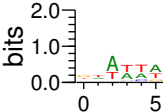

WebLogo 3.7.1

Supplement: SUPPLEMENTAL_Matl.zip [file ATHB-12_cisbp.pdf › pairlogos/ATHB-12_cisbp.pdf]

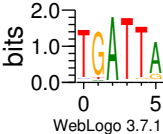

Supplement: SUPPLEMENTAL_Matl.zip [file ATHB-12_predicted.pdf › pairlogos/ATHB-12_predicted.pdf]

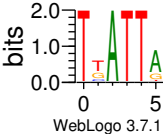

Supplement: SUPPLEMENTAL_Matl.zip [file ATHB-16_cisbp.pdf › pairlogos/ATHB-16_cisbp.pdf]

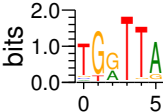

WebLogo 3.7.1

Supplement: SUPPLEMENTAL_Matl.zip [file ATHB-16_predicted.pdf › pairlogos/ATHB-16_predicted.pdf]

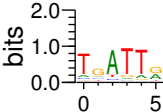

Supplement: SUPPLEMENTAL_Matl.zip [file ATHB-4_cisbp.pdf › pairlogos/ATHB-4_cisbp.pdf]

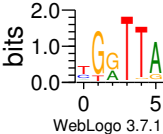

Supplement: SUPPLEMENTAL_Matl.zip [file ATHB-4_predicted.pdf › pairlogos/ATHB-4_predicted.pdf]

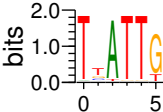

WebLogo 3.7.1

Supplement: SUPPLEMENTAL_Matl.zip [file ATHB-5_cisbp.pdf › pairlogos/ATHB-5_cisbp.pdf]

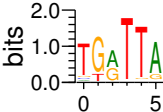

WebLogo 3.7.1

Supplement: SUPPLEMENTAL_Matl.zip [file ATHB-5_predicted.pdf › pairlogos/ATHB-5_predicted.pdf]

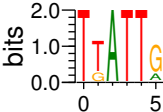

Supplement: SUPPLEMENTAL_Matl.zip [file ATHB-6_cisbp.pdf › pairlogos/ATHB-6_cisbp.pdf]



WebLogo 3.7.1

Supplement: SUPPLEMENTAL_Matl.zip [file ATHB-6_predicted.pdf › pairlogos/ATHB-6_predicted.pdf]

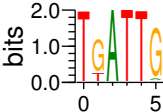

WebLogo 3.7.1

Supplement: SUPPLEMENTAL_Matl.zip [file ATHB-7_cisbp.pdf › pairlogos/ATHB-7_cisbp.pdf]

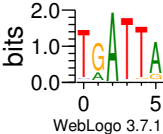

Supplement: SUPPLEMENTAL_Matl.zip [file ATHB-7_predicted.pdf › pairlogos/ATHB-7_predicted.pdf]

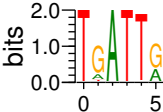

Supplement: SUPPLEMENTAL_Matl.zip [file ATHB-X_cisbp.pdf › pairlogos/ATHB-X_cisbp.pdf]

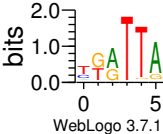

Supplement: SUPPLEMENTAL_Matl.zip [file ATHB-X_predicted.pdf › pairlogos/ATHB-X_predicted.pdf]

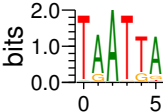

WebLogo 3.7.1

Supplement: SUPPLEMENTAL_Matl.zip [file Awh_cisbp.pdf › pairlogos/Awh_cisbp.pdf]

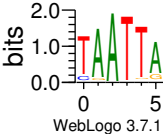

Supplement: SUPPLEMENTAL_Matl.zip [file Awh_predicted.pdf › pairlogos/Awh_predicted.pdf]

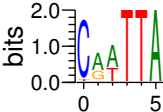

WebLogo 3.7.1

Supplement: SUPPLEMENTAL_Matl.zip [file B-H1_cisbp.pdf › pairlogos/B-H1_cisbp.pdf]

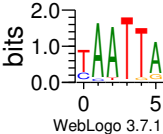

Supplement: SUPPLEMENTAL_Matl.zip [file B-H1_predicted.pdf › pairlogos/B-H1_predicted.pdf]

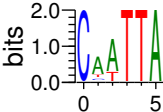

WebLogo 3.7.1

Supplement: SUPPLEMENTAL_Matl.zip [file B-H2_cisbp.pdf › pairlogos/B-H2_cisbp.pdf]



Supplement: SUPPLEMENTAL_Matl.zip [file B-H2_predicted.pdf › pairlogos/B-H2_predicted.pdf]

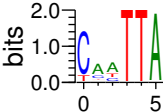

WebLogo 3.7.1

Supplement: SUPPLEMENTAL_Matl.zip [file BARHL1_cisbp.pdf › pairlogos/BARHL1_cisbp.pdf]



Supplement: SUPPLEMENTAL_Matl.zip [file BARHL1_predicted.pdf › pairlogos/BARHL1_predicted.pdf]

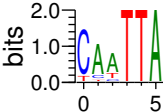

WebLogo 3.7.1

Supplement: SUPPLEMENTAL_Matl.zip [file BARHL2_cisbp.pdf › pairlogos/BARHL2_cisbp.pdf]



Supplement: SUPPLEMENTAL_Matl.zip [file BARHL2_predicted.pdf › pairlogos/BARHL2_predicted.pdf]

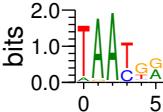

WebLogo 3.7.1

Supplement: SUPPLEMENTAL_Matl.zip [file BARX2_cisbp.pdf › pairlogos/BARX2_cisbp.pdf]

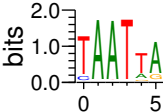

WebLogo 3.7.1

Supplement: SUPPLEMENTAL_Matl.zip [file BARX2_predicted.pdf › pairlogos/BARX2_predicted.pdf]

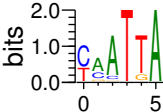

Supplement: SUPPLEMENTAL_Matl.zip [file BSX_cisbp.pdf › pairlogos/BSX_cisbp.pdf]

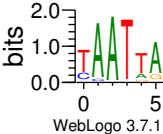

Supplement: SUPPLEMENTAL_Matl.zip [file BSX_predicted.pdf › pairlogos/BSX_predicted.pdf]

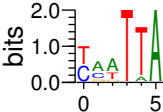

WebLogo 3.7.1

Supplement: SUPPLEMENTAL_Matl.zip [file C15_cisbp.pdf › pairlogos/C15_cisbp.pdf]

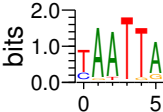

WebLogo 3.7.1

Supplement: SUPPLEMENTAL_Matl.zip [file C15_predicted.pdf › pairlogos/C15_predicted.pdf]

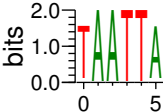

WebLogo 3.7.1

Supplement: SUPPLEMENTAL_Matl.zip [file C4B866_NEMVE_cisbp.pdf › pairlogos/C4B866_NEMVE_cisbp.pdf]

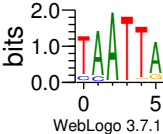

Supplement: SUPPLEMENTAL_Matl.zip [file C4B866_NEMVE_predicted.pdf › pairlogos/C4B866_NEMVE_predicted.pdf]

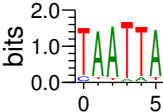

WebLogo 3.7.1

Supplement: SUPPLEMENTAL_Matl.zip [file CAD25284_cisbp.pdf › pairlogos/CAD25284_cisbp.pdf]

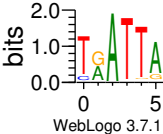

Supplement: SUPPLEMENTAL_Matl.zip [file CAD25284_predicted.pdf › pairlogos/CAD25284_predicted.pdf]

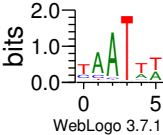

Supplement: SUPPLEMENTAL_Matl.zip [file CAD26261_cisbp.pdf › pairlogos/CAD26261_cisbp.pdf]

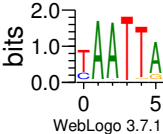

Supplement: SUPPLEMENTAL_Matl.zip [file CAD26261_predicted.pdf › pairlogos/CAD26261_predicted.pdf]

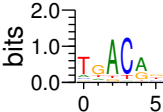

WebLogo 3.7.1

Supplement: SUPPLEMENTAL_Matl.zip [file CAGL0H02959g_cisbp.pdf › pairlogos/CAGL0H02959g_cisbp.pdf]

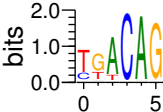

WebLogo 3.7.1

Supplement: SUPPLEMENTAL_Matl.zip [file CAGL0H02959g_predicted.pdf › pairlogos/CAGL0H02959g_predicted.pdf]

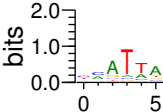

WebLogo 3.7.1

Supplement: SUPPLEMENTAL_Matl.zip [file CBG00023_cisbp.pdf › pairlogos/CBG00023_cisbp.pdf]

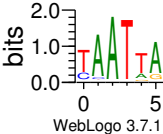

Supplement: SUPPLEMENTAL_Matl.zip [file CBG00023_predicted.pdf › pairlogos/CBG00023_predicted.pdf]

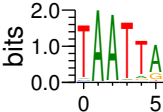

WebLogo 3.7.1

Supplement: SUPPLEMENTAL_Matl.zip [file CBG00029_cisbp.pdf › pairlogos/CBG00029_cisbp.pdf]

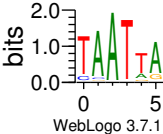

Supplement: SUPPLEMENTAL_Matl.zip [file CBG00029_predicted.pdf › pairlogos/CBG00029_predicted.pdf]

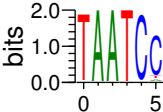

WebLogo 3.7.1

Supplement: SUPPLEMENTAL_Matl.zip [file CBG01820_cisbp.pdf › pairlogos/CBG01820_cisbp.pdf]

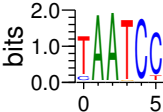

WebLogo 3.7.1

Supplement: SUPPLEMENTAL_Matl.zip [file CBG01820_predicted.pdf › pairlogos/CBG01820_predicted.pdf]

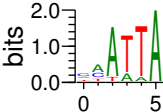

WebLogo 3.7.1

Supplement: SUPPLEMENTAL_Matl.zip [file CBG04010_cisbp.pdf › pairlogos/CBG04010_cisbp.pdf]

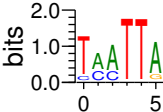

WebLogo 3.7.1

Supplement: SUPPLEMENTAL_Matl.zip [file CBG04010_predicted.pdf › pairlogos/CBG04010_predicted.pdf]

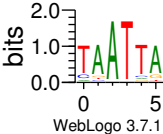

Supplement: SUPPLEMENTAL_Matl.zip [file CBG07641_cisbp.pdf › pairlogos/CBG07641_cisbp.pdf]

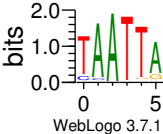

Supplement: SUPPLEMENTAL_Matl.zip [file CBG07641_predicted.pdf › pairlogos/CBG07641_predicted.pdf]

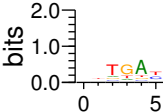

Supplement: SUPPLEMENTAL_Matl.zip [file CBG10835_cisbp.pdf › pairlogos/CBG10835_cisbp.pdf]

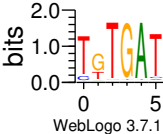

Supplement: SUPPLEMENTAL_Matl.zip [file CBG10835_predicted.pdf › pairlogos/CBG10835_predicted.pdf]

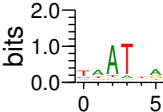

WebLogo 3.7.1

Supplement: SUPPLEMENTAL_Matl.zip [file CBG20882_cisbp.pdf › pairlogos/CBG20882_cisbp.pdf]

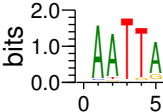

WebLogo 3.7.1

Supplement: SUPPLEMENTAL_Matl.zip [file CBG20882_predicted.pdf › pairlogos/CBG20882_predicted.pdf]

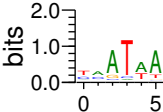

Supplement: SUPPLEMENTAL_Matl.zip [file CBG23031_cisbp.pdf › pairlogos/CBG23031_cisbp.pdf]

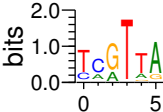

WebLogo 3.7.1

Supplement: SUPPLEMENTAL_Matl.zip [file CBG23031_predicted.pdf › pairlogos/CBG23031_predicted.pdf]

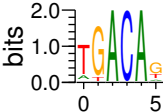

WebLogo 3.7.1

Supplement: SUPPLEMENTAL_Matl.zip [file CBG24578_cisbp.pdf › pairlogos/CBG24578_cisbp.pdf]

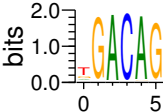

WebLogo 3.7.1

Supplement: SUPPLEMENTAL_Matl.zip [file CBG24578_predicted.pdf › pairlogos/CBG24578_predicted.pdf]
