# Supplementary figures and images for: Learning probabilistic protein–DNA recognition codes from DNA-binding specificities using structural mappings (part 8 of 25)
Source: HighWire-hosted journal article supplement (doi:10.1101/gr.276606.122), 2022-09-01

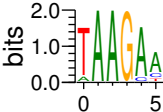

WebLogo 3.6.0

Supplement: SUPPLEMENTAL_Matl.zip [file Q0ZPQ4_NEMVE_QITRTKNYK.pdf › SUPPLEMENTAL_Matl/rCLAMPS/STAMP/alignedLogos_NoyesGrps/logos_1/Q0ZPQ4_NEMVE_QITRTKNYK.pdf]



WebLogo 3.6.0

Supplement: SUPPLEMENTAL_Matl.zip [file Q0ZPQ4_NEMVE_QITRTKNYK_437.pdf › SUPPLEMENTAL_Matl/rCLAMPS/STAMP/alignedLogos_NoyesGrps/logos_1/Q0ZPQ4_NEMVE_QITRTKNYK_437.pdf]

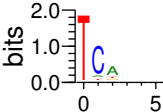

WebLogo 3.6.0

Supplement: SUPPLEMENTAL_Matl.zip [file Q0ZPQ8_NEMVE_KRRGNSNRR.pdf › SUPPLEMENTAL_Matl/rCLAMPS/STAMP/alignedLogos_NoyesGrps/logos_1/Q0ZPQ8_NEMVE_KRRGNSNRR.pdf]

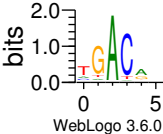

Supplement: SUPPLEMENTAL_Matl.zip [file Q0ZPQ8_NEMVE_KRRGNSNRR_438.pdf › SUPPLEMENTAL_Matl/rCLAMPS/STAMP/alignedLogos_NoyesGrps/logos_1/Q0ZPQ8_NEMVE_KRRGNSNRR_438.pdf]

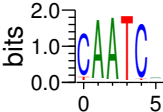

WebLogo 3.6.0

Supplement: SUPPLEMENTAL_Matl.zip [file Q1WMN0_COPDI_HPKKVQNRR_439.pdf › SUPPLEMENTAL_Matl/rCLAMPS/STAMP/alignedLogos_NoyesGrps/logos_1/Q1WMN0_COPDI_HPKKVQNRR_439.pdf]

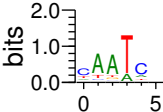

Supplement: SUPPLEMENTAL_Matl.zip [file Q1WMN9_COPDI_VSGKVQNRR_440.pdf › SUPPLEMENTAL_Matl/rCLAMPS/STAMP/alignedLogos_NoyesGrps/logos_1/Q1WMN9_COPDI_VSGKVQNRR_440.pdf]

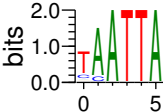

WebLogo 3.6.0

Supplement: SUPPLEMENTAL_Matl.zip [file Q24780_9CNID_KRKRTQNMK.pdf › SUPPLEMENTAL_Matl/rCLAMPS/STAMP/alignedLogos_NoyesGrps/logos_1/Q24780_9CNID_KRKRTQNMK.pdf]

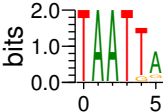

WebLogo 3.6.0

Supplement: SUPPLEMENTAL_Matl.zip [file Q24780_9CNID_KRKRTQNMK_441.pdf › SUPPLEMENTAL_Matl/rCLAMPS/STAMP/alignedLogos_NoyesGrps/logos_1/Q24780_9CNID_KRKRTQNMK_441.pdf]

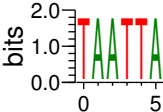

WebLogo 3.6.0

Supplement: SUPPLEMENTAL_Matl.zip [file Q24782_9CNID_CKKRIQNMK.pdf › SUPPLEMENTAL_Matl/rCLAMPS/STAMP/alignedLogos_NoyesGrps/logos_1/Q24782_9CNID_CKKRIQNMK.pdf]



WebLogo 3.6.0

Supplement: SUPPLEMENTAL_Matl.zip [file Q24782_9CNID_CKKRIQNMK_442.pdf › SUPPLEMENTAL_Matl/rCLAMPS/STAMP/alignedLogos_NoyesGrps/logos_1/Q24782_9CNID_CKKRIQNMK_442.pdf]

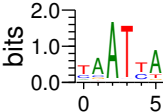

WebLogo 3.6.0

Supplement: SUPPLEMENTAL_Matl.zip [file Q4RRY4_TETNG_RRKRVQNAR.pdf › SUPPLEMENTAL_Matl/rCLAMPS/STAMP/alignedLogos_NoyesGrps/logos_1/Q4RRY4_TETNG_RRKRVQNAR.pdf]



WebLogo 3.6.0

Supplement: SUPPLEMENTAL_Matl.zip [file Q4RRY4_TETNG_RRKRVQNAR_443.pdf › SUPPLEMENTAL_Matl/rCLAMPS/STAMP/alignedLogos_NoyesGrps/logos_1/Q4RRY4_TETNG_RRKRVQNAR_443.pdf]

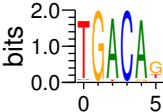

WebLogo 3.6.0

Supplement: SUPPLEMENTAL_Matl.zip [file Q5EVH4_OIKDI_LKRGNINRR_444.pdf › SUPPLEMENTAL_Matl/rCLAMPS/STAMP/alignedLogos_NoyesGrps/logos_1/Q5EVH4_OIKDI_LKRGNINRR_444.pdf]

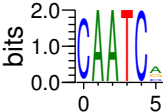

WebLogo 3.6.0

Supplement: SUPPLEMENTAL_Matl.zip [file Q68SS9_PLEDJ_PAAKVQNNR.pdf › SUPPLEMENTAL_Matl/rCLAMPS/STAMP/alignedLogos_NoyesGrps/logos_1/Q68SS9_PLEDJ_PAAKVQNNR.pdf]



WebLogo 3.6.0

Supplement: SUPPLEMENTAL_Matl.zip [file Q68SS9_PLEDJ_PAAKVQNNR_445.pdf › SUPPLEMENTAL_Matl/rCLAMPS/STAMP/alignedLogos_NoyesGrps/logos_1/Q68SS9_PLEDJ_PAAKVQNNR_445.pdf]

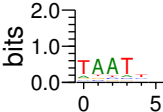

WebLogo 3.6.0

Supplement: SUPPLEMENTAL_Matl.zip [file Q6WL90_TRICY_RKNRVSNAK.pdf › SUPPLEMENTAL_Matl/rCLAMPS/STAMP/alignedLogos_NoyesGrps/logos_1/Q6WL90_TRICY_RKNRVSNAK.pdf]



WebLogo 3.6.0

Supplement: SUPPLEMENTAL_Matl.zip [file Q6WL90_TRICY_RKNRVSNAK_446.pdf › SUPPLEMENTAL_Matl/rCLAMPS/STAMP/alignedLogos_NoyesGrps/logos_1/Q6WL90_TRICY_RKNRVSNAK_446.pdf]

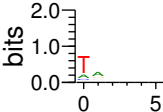

Supplement: SUPPLEMENTAL_Matl.zip [file Q6Y859_MARMO_LQEHVKNAR_447.pdf › SUPPLEMENTAL_Matl/rCLAMPS/STAMP/alignedLogos_NoyesGrps/logos_1/Q6Y859_MARMO_LQEHVKNAR_447.pdf]

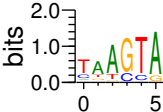

WebLogo 3.6.0

Supplement: SUPPLEMENTAL_Matl.zip [file Q70HR3_PLEPI_KRTRRQNCK.pdf › SUPPLEMENTAL_Matl/rCLAMPS/STAMP/alignedLogos_NoyesGrps/logos_1/Q70HR3_PLEPI_KRTRRQNCK.pdf]



WebLogo 3.6.0

Supplement: SUPPLEMENTAL_Matl.zip [file Q70HR3_PLEPI_KRTRRQNCK_448.pdf › SUPPLEMENTAL_Matl/rCLAMPS/STAMP/alignedLogos_NoyesGrps/logos_1/Q70HR3_PLEPI_KRTRRQNCK_448.pdf]

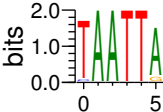

WebLogo 3.6.0

Supplement: SUPPLEMENTAL_Matl.zip [file Q70LF3_ARTSF_DKYRIQNAK.pdf › SUPPLEMENTAL_Matl/rCLAMPS/STAMP/alignedLogos_NoyesGrps/logos_1/Q70LF3_ARTSF_DKYRIQNAK.pdf]



WebLogo 3.6.0

Supplement: SUPPLEMENTAL_Matl.zip [file Q70LF3_ARTSF_DKYRIQNAK_449.pdf › SUPPLEMENTAL_Matl/rCLAMPS/STAMP/alignedLogos_NoyesGrps/logos_1/Q70LF3_ARTSF_DKYRIQNAK_449.pdf]

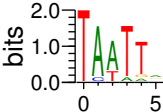

WebLogo 3.6.0

Supplement: SUPPLEMENTAL_Matl.zip [file Q7M3U4_ACRFO_NKKRIQNMK.pdf › SUPPLEMENTAL_Matl/rCLAMPS/STAMP/alignedLogos_NoyesGrps/logos_1/Q7M3U4_ACRFO_NKKRIQNMK.pdf]



WebLogo 3.6.0

Supplement: SUPPLEMENTAL_Matl.zip [file Q7M3U4_ACRFO_NKKRIQNMK_450.pdf › SUPPLEMENTAL_Matl/rCLAMPS/STAMP/alignedLogos_NoyesGrps/logos_1/Q7M3U4_ACRFO_NKKRIQNMK_450.pdf]

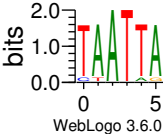

Supplement: SUPPLEMENTAL_Matl.zip [file Q86SD7_PODCA_RRKRIQNAK.pdf › SUPPLEMENTAL_Matl/rCLAMPS/STAMP/alignedLogos_NoyesGrps/logos_1/Q86SD7_PODCA_RRKRIQNAK.pdf]



Supplement: SUPPLEMENTAL_Matl.zip [file Q86SD7_PODCA_RRKRIQNAK_451.pdf › SUPPLEMENTAL_Matl/rCLAMPS/STAMP/alignedLogos_NoyesGrps/logos_1/Q86SD7_PODCA_RRKRIQNAK_451.pdf]

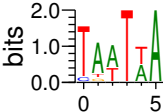

WebLogo 3.6.0

Supplement: SUPPLEMENTAL_Matl.zip [file Q8I9J5_9BILA_RKRRIQNMK.pdf › SUPPLEMENTAL_Matl/rCLAMPS/STAMP/alignedLogos_NoyesGrps/logos_1/Q8I9J5_9BILA_RKRRIQNMK.pdf]



WebLogo 3.6.0

Supplement: SUPPLEMENTAL_Matl.zip [file Q8I9J5_9BILA_RKRRIQNMK_452.pdf › SUPPLEMENTAL_Matl/rCLAMPS/STAMP/alignedLogos_NoyesGrps/logos_1/Q8I9J5_9BILA_RKRRIQNMK_452.pdf]

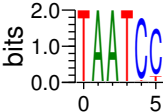

WebLogo 3.6.0

Supplement: SUPPLEMENTAL_Matl.zip [file Q8VHG7_MOUSE_RKERIKNAK.pdf › SUPPLEMENTAL_Matl/rCLAMPS/STAMP/alignedLogos_NoyesGrps/logos_1/Q8VHG7_MOUSE_RKERIKNAK.pdf]



WebLogo 3.6.0

Supplement: SUPPLEMENTAL_Matl.zip [file Q8VHG7_MOUSE_RKERIKNAK_453.pdf › SUPPLEMENTAL_Matl/rCLAMPS/STAMP/alignedLogos_NoyesGrps/logos_1/Q8VHG7_MOUSE_RKERIKNAK_453.pdf]

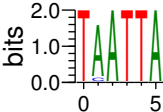

WebLogo 3.6.0

Supplement: SUPPLEMENTAL_Matl.zip [file Q9BJW6_9CNID_HGTRVQNMK.pdf › SUPPLEMENTAL_Matl/rCLAMPS/STAMP/alignedLogos_NoyesGrps/logos_1/Q9BJW6_9CNID_HGTRVQNMK.pdf]

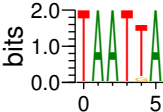

WebLogo 3.6.0

Supplement: SUPPLEMENTAL_Matl.zip [file Q9BJW6_9CNID_HGTRVQNMK_454.pdf › SUPPLEMENTAL_Matl/rCLAMPS/STAMP/alignedLogos_NoyesGrps/logos_1/Q9BJW6_9CNID_HGTRVQNMK_454.pdf]

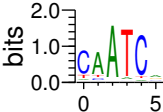

WebLogo 3.6.0

Supplement: SUPPLEMENTAL_Matl.zip [file Q9C1N5_COPSC_ESKRVQNSR.pdf › SUPPLEMENTAL_Matl/rCLAMPS/STAMP/alignedLogos_NoyesGrps/logos_1/Q9C1N5_COPSC_ESKRVQNSR.pdf]



WebLogo 3.6.0

Supplement: SUPPLEMENTAL_Matl.zip [file Q9C1N5_COPSC_ESKRVQNSR_455.pdf › SUPPLEMENTAL_Matl/rCLAMPS/STAMP/alignedLogos_NoyesGrps/logos_1/Q9C1N5_COPSC_ESKRVQNSR_455.pdf]

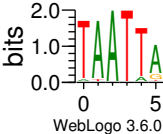

Supplement: SUPPLEMENTAL_Matl.zip [file Q9GP48_9TURB_DKYRIQNAK.pdf › SUPPLEMENTAL_Matl/rCLAMPS/STAMP/alignedLogos_NoyesGrps/logos_1/Q9GP48_9TURB_DKYRIQNAK.pdf]

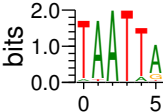

WebLogo 3.6.0

Supplement: SUPPLEMENTAL_Matl.zip [file Q9GP48_9TURB_DKYRIQNAK_456.pdf › SUPPLEMENTAL_Matl/rCLAMPS/STAMP/alignedLogos_NoyesGrps/logos_1/Q9GP48_9TURB_DKYRIQNAK_456.pdf]

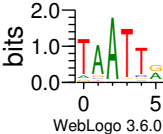

Supplement: SUPPLEMENTAL_Matl.zip [file RAX2_RRNRVQNAK.pdf › SUPPLEMENTAL_Matl/rCLAMPS/STAMP/alignedLogos_NoyesGrps/logos_1/RAX2_RRNRVQNAK.pdf]



Supplement: SUPPLEMENTAL_Matl.zip [file RAX2_RRNRVQNAK_458.pdf › SUPPLEMENTAL_Matl/rCLAMPS/STAMP/alignedLogos_NoyesGrps/logos_1/RAX2_RRNRVQNAK_458.pdf]

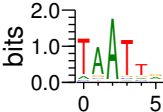

WebLogo 3.6.0

Supplement: SUPPLEMENTAL_Matl.zip [file RAX_RRNRVQNAK.pdf › SUPPLEMENTAL_Matl/rCLAMPS/STAMP/alignedLogos_NoyesGrps/logos_1/RAX_RRNRVQNAK.pdf]

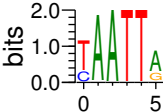

WebLogo 3.6.0

Supplement: SUPPLEMENTAL_Matl.zip [file RAX_RRNRVQNAK_457.pdf › SUPPLEMENTAL_Matl/rCLAMPS/STAMP/alignedLogos_NoyesGrps/logos_1/RAX_RRNRVQNAK_457.pdf]

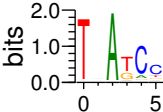

WebLogo 3.6.0

Supplement: SUPPLEMENTAL_Matl.zip [file RHOXF1_RTRRVKNAR.pdf › SUPPLEMENTAL_Matl/rCLAMPS/STAMP/alignedLogos_NoyesGrps/logos_1/RHOXF1_RTRRVKNAR.pdf]



WebLogo 3.6.0

Supplement: SUPPLEMENTAL_Matl.zip [file RHOXF1_RTRRVKNAR_459.pdf › SUPPLEMENTAL_Matl/rCLAMPS/STAMP/alignedLogos_NoyesGrps/logos_1/RHOXF1_RTRRVKNAR_459.pdf]

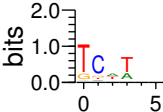

WebLogo 3.6.0

Supplement: SUPPLEMENTAL_Matl.zip [file RLT1_KPKRMCHLK.pdf › SUPPLEMENTAL_Matl/rCLAMPS/STAMP/alignedLogos_NoyesGrps/logos_1/RLT1_KPKRMCHLK.pdf]



WebLogo 3.6.0

Supplement: SUPPLEMENTAL_Matl.zip [file RLT1_KPKRMCHLK_460.pdf › SUPPLEMENTAL_Matl/rCLAMPS/STAMP/alignedLogos_NoyesGrps/logos_1/RLT1_KPKRMCHLK_460.pdf]



WebLogo 3.6.0

Supplement: SUPPLEMENTAL_Matl.zip [file Rax_RRNRVQNAK_461.pdf › SUPPLEMENTAL_Matl/rCLAMPS/STAMP/alignedLogos_NoyesGrps/logos_1/Rax_RRNRVQNAK_461.pdf]

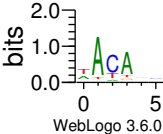

Supplement: SUPPLEMENTAL_Matl.zip [file Rhox11_PRKADNNAK.pdf › SUPPLEMENTAL_Matl/rCLAMPS/STAMP/alignedLogos_NoyesGrps/logos_1/Rhox11_PRKADNNAK.pdf]



Supplement: SUPPLEMENTAL_Matl.zip [file Rhox11_PRKADNNAK_462.pdf › SUPPLEMENTAL_Matl/rCLAMPS/STAMP/alignedLogos_NoyesGrps/logos_1/Rhox11_PRKADNNAK_462.pdf]

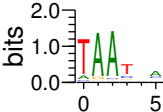

WebLogo 3.6.0

Supplement: SUPPLEMENTAL_Matl.zip [file Rhox6_RYRRNRMAL.pdf › SUPPLEMENTAL_Matl/rCLAMPS/STAMP/alignedLogos_NoyesGrps/logos_1/Rhox6_RYRRNRMAL.pdf]



WebLogo 3.6.0

Supplement: SUPPLEMENTAL_Matl.zip [file Rhox6_RYRRNRMAL_463.pdf › SUPPLEMENTAL_Matl/rCLAMPS/STAMP/alignedLogos_NoyesGrps/logos_1/Rhox6_RYRRNRMAL_463.pdf]

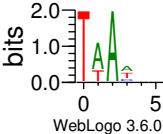

Supplement: SUPPLEMENTAL_Matl.zip [file Rhox8_SRNRNKSAK.pdf › SUPPLEMENTAL_Matl/rCLAMPS/STAMP/alignedLogos_NoyesGrps/logos_1/Rhox8_SRNRNKSAK.pdf]



Supplement: SUPPLEMENTAL_Matl.zip [file Rhox8_SRNRNKSAK_464.pdf › SUPPLEMENTAL_Matl/rCLAMPS/STAMP/alignedLogos_NoyesGrps/logos_1/Rhox8_SRNRNKSAK_464.pdf]

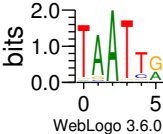

Supplement: SUPPLEMENTAL_Matl.zip [file Rx_RRNRVQNAK.pdf › SUPPLEMENTAL_Matl/rCLAMPS/STAMP/alignedLogos_NoyesGrps/logos_1/Rx_RRNRVQNAK.pdf]



Supplement: SUPPLEMENTAL_Matl.zip [file Rx_RRNRVQNAK_465.pdf › SUPPLEMENTAL_Matl/rCLAMPS/STAMP/alignedLogos_NoyesGrps/logos_1/Rx_RRNRVQNAK_465.pdf]

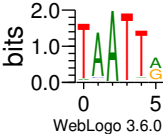

Supplement: SUPPLEMENTAL_Matl.zip [file SHOX2_RRSRVQNAK.pdf › SUPPLEMENTAL_Matl/rCLAMPS/STAMP/alignedLogos_NoyesGrps/logos_1/SHOX2_RRSRVQNAK.pdf]

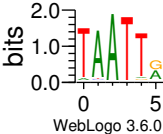

Supplement: SUPPLEMENTAL_Matl.zip [file SHOX2_RRSRVQNAK_467.pdf › SUPPLEMENTAL_Matl/rCLAMPS/STAMP/alignedLogos_NoyesGrps/logos_1/SHOX2_RRSRVQNAK_467.pdf]

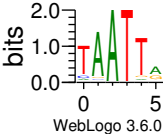

Supplement: SUPPLEMENTAL_Matl.zip [file SHOX_RRSRVQNAK.pdf › SUPPLEMENTAL_Matl/rCLAMPS/STAMP/alignedLogos_NoyesGrps/logos_1/SHOX_RRSRVQNAK.pdf]



Supplement: SUPPLEMENTAL_Matl.zip [file SHOX_RRSRVQNAK_466.pdf › SUPPLEMENTAL_Matl/rCLAMPS/STAMP/alignedLogos_NoyesGrps/logos_1/SHOX_RRSRVQNAK_466.pdf]

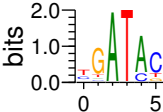

WebLogo 3.6.0

Supplement: SUPPLEMENTAL_Matl.zip [file SIX1_EETSNKNQR_468.pdf › SUPPLEMENTAL_Matl/rCLAMPS/STAMP/alignedLogos_NoyesGrps/logos_1/SIX1_EETSNKNQR_468.pdf]

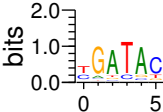

WebLogo 3.6.0

Supplement: SUPPLEMENTAL_Matl.zip [file SIX2_EETSNKNQR_469.pdf › SUPPLEMENTAL_Matl/rCLAMPS/STAMP/alignedLogos_NoyesGrps/logos_1/SIX2_EETSNKNQR_469.pdf]

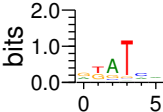

WebLogo 3.6.0

Supplement: SUPPLEMENTAL_Matl.zip [file SIX3_EQKTNKNQR.pdf › SUPPLEMENTAL_Matl/rCLAMPS/STAMP/alignedLogos_NoyesGrps/logos_1/SIX3_EQKTNKNQR.pdf]

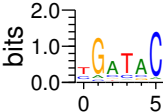

WebLogo 3.6.0

Supplement: SUPPLEMENTAL_Matl.zip [file SIX4_EETVNKNQR_470.pdf › SUPPLEMENTAL_Matl/rCLAMPS/STAMP/alignedLogos_NoyesGrps/logos_1/SIX4_EETVNKNQR_470.pdf]

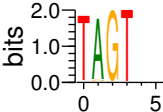

WebLogo 3.6.0

Supplement: SUPPLEMENTAL_Matl.zip [file SIX5_EETVNKNQR_471.pdf › SUPPLEMENTAL_Matl/rCLAMPS/STAMP/alignedLogos_NoyesGrps/logos_1/SIX5_EETVNKNQR_471.pdf]

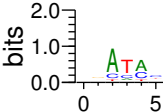

Supplement: SUPPLEMENTAL_Matl.zip [file SIX6_EQKTNKNQR.pdf › SUPPLEMENTAL_Matl/rCLAMPS/STAMP/alignedLogos_NoyesGrps/logos_1/SIX6_EQKTNKNQR.pdf]

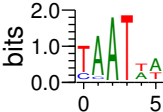

WebLogo 3.6.0

Supplement: SUPPLEMENTAL_Matl.zip [file SNAPOd2T00003340001_KRPRVQNAK.pdf › SUPPLEMENTAL_Matl/rCLAMPS/STAMP/alignedLogos_NoyesGrps/logos_1/SNAPOd2T00003340001_KRPRVQNAK.pdf]



WebLogo 3.6.0

Supplement: SUPPLEMENTAL_Matl.zip [file SNAPOd2T00003340001_KRPRVQNAK_472.pdf › SUPPLEMENTAL_Matl/rCLAMPS/STAMP/alignedLogos_NoyesGrps/logos_1/SNAPOd2T00003340001_KRPRVQNAK_472.pdf]

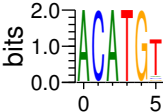

WebLogo 3.6.0

Supplement: SUPPLEMENTAL_Matl.zip [file SNAPOd2T00005194001_NGHRTANRR.pdf › SUPPLEMENTAL_Matl/rCLAMPS/STAMP/alignedLogos_NoyesGrps/logos_1/SNAPOd2T00005194001_NGHRTANRR.pdf]

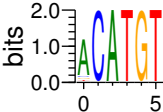

WebLogo 3.6.0

Supplement: SUPPLEMENTAL_Matl.zip [file SNAPOd2T00005194001_NGHRTANRR_473.pdf › SUPPLEMENTAL_Matl/rCLAMPS/STAMP/alignedLogos_NoyesGrps/logos_1/SNAPOd2T00005194001_NGHRTANRR_473.pdf]

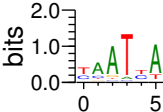

WebLogo 3.6.0

Supplement: SUPPLEMENTAL_Matl.zip [file SNAPOd2T00006145001_RRMRVQNAR.pdf › SUPPLEMENTAL_Matl/rCLAMPS/STAMP/alignedLogos_NoyesGrps/logos_1/SNAPOd2T00006145001_RRMRVQNAR.pdf]



WebLogo 3.6.0

Supplement: SUPPLEMENTAL_Matl.zip [file SNAPOd2T00006145001_RRMRVQNAR_474.pdf › SUPPLEMENTAL_Matl/rCLAMPS/STAMP/alignedLogos_NoyesGrps/logos_1/SNAPOd2T00006145001_RRMRVQNAR_474.pdf]

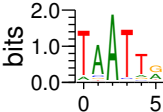

WebLogo 3.6.0

Supplement: SUPPLEMENTAL_Matl.zip [file SNAPOd2T00006620001_RRSRVQNAK.pdf › SUPPLEMENTAL_Matl/rCLAMPS/STAMP/alignedLogos_NoyesGrps/logos_1/SNAPOd2T00006620001_RRSRVQNAK.pdf]

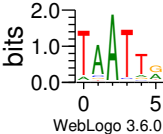

Supplement: SUPPLEMENTAL_Matl.zip [file SNAPOd2T00006620001_RRSRVQNAK_475.pdf › SUPPLEMENTAL_Matl/rCLAMPS/STAMP/alignedLogos_NoyesGrps/logos_1/SNAPOd2T00006620001_RRSRVQNAK_475.pdf]

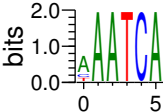

WebLogo 3.6.0

Supplement: SUPPLEMENTAL_Matl.zip [file SNOG_08903_AKRRTSNSR.pdf › SUPPLEMENTAL_Matl/rCLAMPS/STAMP/alignedLogos_NoyesGrps/logos_1/SNOG_08903_AKRRTSNSR.pdf]



WebLogo 3.6.0

Supplement: SUPPLEMENTAL_Matl.zip [file SNOG_08903_AKRRTSNSR_476.pdf › SUPPLEMENTAL_Matl/rCLAMPS/STAMP/alignedLogos_NoyesGrps/logos_1/SNOG_08903_AKRRTSNSR_476.pdf]

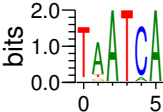

WebLogo 3.6.0

Supplement: SUPPLEMENTAL_Matl.zip [file SNOG_11642_KGAQNNNAR_477.pdf › SUPPLEMENTAL_Matl/rCLAMPS/STAMP/alignedLogos_NoyesGrps/logos_1/SNOG_11642_KGAQNNNAR_477.pdf]

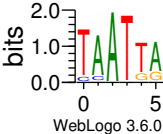

Supplement: SUPPLEMENTAL_Matl.zip [file SPU_026099_KRTRIQNMK.pdf › SUPPLEMENTAL_Matl/rCLAMPS/STAMP/alignedLogos_NoyesGrps/logos_1/SPU_026099_KRTRIQNMK.pdf]



Supplement: SUPPLEMENTAL_Matl.zip [file SPU_026099_KRTRIQNMK_478.pdf › SUPPLEMENTAL_Matl/rCLAMPS/STAMP/alignedLogos_NoyesGrps/logos_1/SPU_026099_KRTRIQNMK_478.pdf]

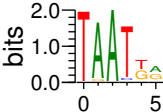

WebLogo 3.6.0

Supplement: SUPPLEMENTAL_Matl.zip [file Scr_KRQRIQNMK.pdf › SUPPLEMENTAL_Matl/rCLAMPS/STAMP/alignedLogos_NoyesGrps/logos_1/Scr_KRQRIQNMK.pdf]

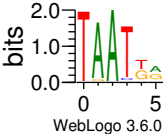

Supplement: SUPPLEMENTAL_Matl.zip [file Scr_KRQRIQNMK_479.pdf › SUPPLEMENTAL_Matl/rCLAMPS/STAMP/alignedLogos_NoyesGrps/logos_1/Scr_KRQRIQNMK_479.pdf]

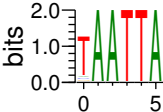

WebLogo 3.6.0

Supplement: SUPPLEMENTAL_Matl.zip [file Sebox_RRKRVQNAK.pdf › SUPPLEMENTAL_Matl/rCLAMPS/STAMP/alignedLogos_NoyesGrps/logos_1/Sebox_RRKRVQNAK.pdf]



WebLogo 3.6.0

Supplement: SUPPLEMENTAL_Matl.zip [file Sebox_RRKRVQNAK_480.pdf › SUPPLEMENTAL_Matl/rCLAMPS/STAMP/alignedLogos_NoyesGrps/logos_1/Sebox_RRKRVQNAK_480.pdf]



Supplement: SUPPLEMENTAL_Matl.zip [file Shox2_RRSRVQNAK_481.pdf › SUPPLEMENTAL_Matl/rCLAMPS/STAMP/alignedLogos_NoyesGrps/logos_1/Shox2_RRSRVQNAK_481.pdf]

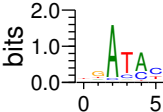

WebLogo 3.6.0

Supplement: SUPPLEMENTAL_Matl.zip [file Six1_EETSNKNQR_482.pdf › SUPPLEMENTAL_Matl/rCLAMPS/STAMP/alignedLogos_NoyesGrps/logos_1/Six1_EETSNKNQR_482.pdf]

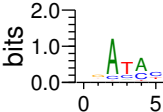

WebLogo 3.6.0

Supplement: SUPPLEMENTAL_Matl.zip [file Six2_EETSNKNQR_483.pdf › SUPPLEMENTAL_Matl/rCLAMPS/STAMP/alignedLogos_NoyesGrps/logos_1/Six2_EETSNKNQR_483.pdf]

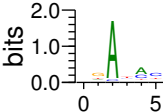

Supplement: SUPPLEMENTAL_Matl.zip [file Six4_EETVNKNQR_484.pdf › SUPPLEMENTAL_Matl/rCLAMPS/STAMP/alignedLogos_NoyesGrps/logos_1/Six4_EETVNKNQR_484.pdf]

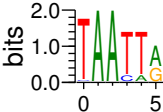

WebLogo 3.6.0

Supplement: SUPPLEMENTAL_Matl.zip [file Smp_158000_RKTRTQNAK.pdf › SUPPLEMENTAL_Matl/rCLAMPS/STAMP/alignedLogos_NoyesGrps/logos_1/Smp_158000_RKTRTQNAK.pdf]



WebLogo 3.6.0

Supplement: SUPPLEMENTAL_Matl.zip [file Smp_158000_RKTRTQNAK_485.pdf › SUPPLEMENTAL_Matl/rCLAMPS/STAMP/alignedLogos_NoyesGrps/logos_1/Smp_158000_RKTRTQNAK_485.pdf]

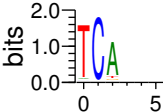

Supplement: SUPPLEMENTAL_Matl.zip [file TGIF1_RRRRNINRR.pdf › SUPPLEMENTAL_Matl/rCLAMPS/STAMP/alignedLogos_NoyesGrps/logos_1/TGIF1_RRRRNINRR.pdf]

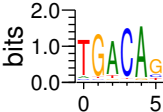

WebLogo 3.6.0

Supplement: SUPPLEMENTAL_Matl.zip [file TGIF1_RRRRNINRR_486.pdf › SUPPLEMENTAL_Matl/rCLAMPS/STAMP/alignedLogos_NoyesGrps/logos_1/TGIF1_RRRRNINRR_486.pdf]

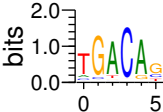

WebLogo 3.6.0

Supplement: SUPPLEMENTAL_Matl.zip [file TGIF2LX_KGNLNINRR_488.pdf › SUPPLEMENTAL_Matl/rCLAMPS/STAMP/alignedLogos_NoyesGrps/logos_1/TGIF2LX_KGNLNINRR_488.pdf]

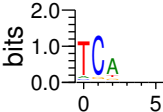

Supplement: SUPPLEMENTAL_Matl.zip [file TGIF2LX_KRKGNINRR.pdf › SUPPLEMENTAL_Matl/rCLAMPS/STAMP/alignedLogos_NoyesGrps/logos_1/TGIF2LX_KRKGNINRR.pdf]

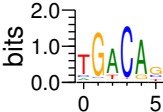

WebLogo 3.6.0

Supplement: SUPPLEMENTAL_Matl.zip [file TGIF2LY_KGNLNINRR_489.pdf › SUPPLEMENTAL_Matl/rCLAMPS/STAMP/alignedLogos_NoyesGrps/logos_1/TGIF2LY_KGNLNINRR_489.pdf]

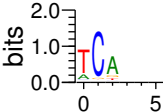

Supplement: SUPPLEMENTAL_Matl.zip [file TGIF2LY_KRKGNINRR.pdf › SUPPLEMENTAL_Matl/rCLAMPS/STAMP/alignedLogos_NoyesGrps/logos_1/TGIF2LY_KRKGNINRR.pdf]

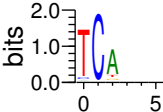

Supplement: SUPPLEMENTAL_Matl.zip [file TGIF2_RKRRNINRR.pdf › SUPPLEMENTAL_Matl/rCLAMPS/STAMP/alignedLogos_NoyesGrps/logos_1/TGIF2_RKRRNINRR.pdf]

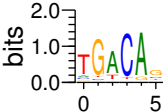

WebLogo 3.6.0

Supplement: SUPPLEMENTAL_Matl.zip [file TGIF2_RKRRNINRR_487.pdf › SUPPLEMENTAL_Matl/rCLAMPS/STAMP/alignedLogos_NoyesGrps/logos_1/TGIF2_RKRRNINRR_487.pdf]

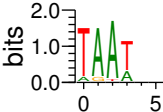

Supplement: SUPPLEMENTAL_Matl.zip [file TLX2_KKPRTQNTK.pdf › SUPPLEMENTAL_Matl/rCLAMPS/STAMP/alignedLogos_NoyesGrps/logos_1/TLX2_KKPRTQNTK.pdf]

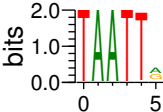

WebLogo 3.6.0

Supplement: SUPPLEMENTAL_Matl.zip [file TLX2_KKPRTQNTK_490.pdf › SUPPLEMENTAL_Matl/rCLAMPS/STAMP/alignedLogos_NoyesGrps/logos_1/TLX2_KKPRTQNTK_490.pdf]

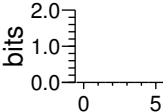

WebLogo 3.6.0

Supplement: SUPPLEMENTAL_Matl.zip [file TLX3_KKPRTQNTK.pdf › SUPPLEMENTAL_Matl/rCLAMPS/STAMP/alignedLogos_NoyesGrps/logos_1/TLX3_KKPRTQNTK.pdf]



WebLogo 3.6.0

Supplement: SUPPLEMENTAL_Matl.zip [file TLX3_KKPRTQNTK_491.pdf › SUPPLEMENTAL_Matl/rCLAMPS/STAMP/alignedLogos_NoyesGrps/logos_1/TLX3_KKPRTQNTK_491.pdf]

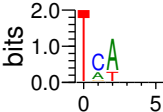

WebLogo 3.6.0

Supplement: SUPPLEMENTAL_Matl.zip [file TOS8_HGKRNINRR.pdf › SUPPLEMENTAL_Matl/rCLAMPS/STAMP/alignedLogos_NoyesGrps/logos_1/TOS8_HGKRNINRR.pdf]



WebLogo 3.6.0

Supplement: SUPPLEMENTAL_Matl.zip [file TOS8_HGKRNINRR_492.pdf › SUPPLEMENTAL_Matl/rCLAMPS/STAMP/alignedLogos_NoyesGrps/logos_1/TOS8_HGKRNINRR_492.pdf]
