# Supplementary figures and images for: Learning probabilistic protein–DNA recognition codes from DNA-binding specificities using structural mappings (part 17 of 25)
Source: HighWire-hosted journal article supplement (doi:10.1101/gr.276606.122), 2022-09-01

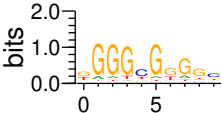

WebLogo 3.6.0

Supplement: SUPPLEMENTAL_Matl.zip [file T094908_2.00_KSHSRDERRDHK_50.pdf › SUPPLEMENTAL_Matl/rCLAMPS/my_results/zf-C2H2_250_50_seedFFSdiverse6/0_logos_predicted_hoo/T094908_2.00_KSHSRDERRDHK_50.pdf]

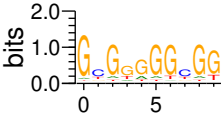

Supplement: SUPPLEMENTAL_Matl.zip [file T094930_2.00_RDERRDHTRDER_51.pdf › SUPPLEMENTAL_Matl/rCLAMPS/my_results/zf-C2H2_250_50_seedFFSdiverse6/0_logos_predicted_hoo/T094930_2.00_RDERRDHTRDER_51.pdf]

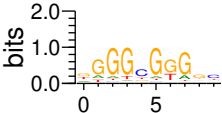

WebLogo 3.6.0

Supplement: SUPPLEMENTAL_Matl.zip [file T094932_2.00_KSHARDERRDHL_52.pdf › SUPPLEMENTAL_Matl/rCLAMPS/my_results/zf-C2H2_250_50_seedFFSdiverse6/0_logos_predicted_hoo/T094932_2.00_KSHARDERRDHL_52.pdf]

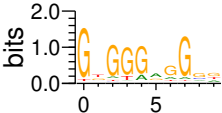

WebLogo 3.6.0

Supplement: SUPPLEMENTAL_Matl.zip [file T094940_2.00_SYHRQYHRRDRR_53.pdf › SUPPLEMENTAL_Matl/rCLAMPS/my_results/zf-C2H2_250_50_seedFFSdiverse6/0_logos_predicted_hoo/T094940_2.00_SYHRQYHRRDRR_53.pdf]

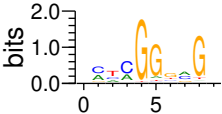

# WebLogo 3.6.0

Supplement: SUPPLEMENTAL_Matl.zip [file T094954_2.00_KYNIRDHDQRTV_54.pdf › SUPPLEMENTAL_Matl/rCLAMPS/my_results/zf-C2H2_250_50_seedFFSdiverse6/0_logos_predicted_hoo/T094954_2.00_KYNIRDHDQRTV_54.pdf]

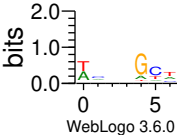

Supplement: SUPPLEMENTAL_Matl.zip [file T094977_2.00_WTHEHSVE_55.pdf › SUPPLEMENTAL_Matl/rCLAMPS/my_results/zf-C2H2_250_50_seedFFSdiverse6/0_logos_predicted_hoo/T094977_2.00_WTHEHSVE_55.pdf]

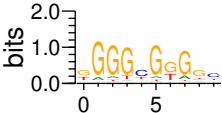

WebLogo 3.6.0

Supplement: SUPPLEMENTAL_Matl.zip [file T094987_2.00_KSHARDERRDHK_56.pdf › SUPPLEMENTAL_Matl/rCLAMPS/my_results/zf-C2H2_250_50_seedFFSdiverse6/0_logos_predicted_hoo/T094987_2.00_KSHARDERRDHK_56.pdf]

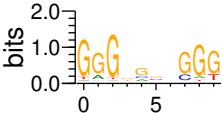

WebLogo 3.6.0

Supplement: SUPPLEMENTAL_Matl.zip [file T095006_2.00_RDKIHYDNKDHR_57.pdf › SUPPLEMENTAL_Matl/rCLAMPS/my_results/zf-C2H2_250_50_seedFFSdiverse6/0_logos_predicted_hoo/T095006_2.00_RDKIHYDNKDHR_57.pdf]



WebLogo 3.6.0

Supplement: SUPPLEMENTAL_Matl.zip [file T095022_2.00_KSHARDERRDHK_58.pdf › SUPPLEMENTAL_Matl/rCLAMPS/my_results/zf-C2H2_250_50_seedFFSdiverse6/0_logos_predicted_hoo/T095022_2.00_KSHARDERRDHK_58.pdf]



WebLogo 3.6.0

Supplement: SUPPLEMENTAL_Matl.zip [file T095027_2.00_KSHARDERRDHK_59.pdf › SUPPLEMENTAL_Matl/rCLAMPS/my_results/zf-C2H2_250_50_seedFFSdiverse6/0_logos_predicted_hoo/T095027_2.00_KSHARDERRDHK_59.pdf]

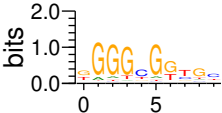

WebLogo 3.6.0

Supplement: SUPPLEMENTAL_Matl.zip [file T095047_2.00_KSLARDERRDHK_60.pdf › SUPPLEMENTAL_Matl/rCLAMPS/my_results/zf-C2H2_250_50_seedFFSdiverse6/0_logos_predicted_hoo/T095047_2.00_KSLARDERRDHK_60.pdf]

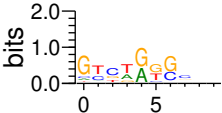

WebLogo 3.6.0

Supplement: SUPPLEMENTAL_Matl.zip [file T095075_2.00_HSQRMHHGWDSR_61.pdf › SUPPLEMENTAL_Matl/rCLAMPS/my_results/zf-C2H2_250_50_seedFFSdiverse6/0_logos_predicted_hoo/T095075_2.00_HSQRMHHGWDSR_61.pdf]



WebLogo 3.6.0

Supplement: SUPPLEMENTAL_Matl.zip [file T095080_2.00_KSHARDERRDHK_62.pdf › SUPPLEMENTAL_Matl/rCLAMPS/my_results/zf-C2H2_250_50_seedFFSdiverse6/0_logos_predicted_hoo/T095080_2.00_KSHARDERRDHK_62.pdf]

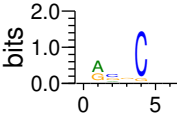

WebLogo 3.6.0

Supplement: SUPPLEMENTAL_Matl.zip [file T095087_2.00_HSDRQQHQ_63.pdf › SUPPLEMENTAL_Matl/rCLAMPS/my_results/zf-C2H2_250_50_seedFFSdiverse6/0_logos_predicted_hoo/T095087_2.00_HSDRQQHQ_63.pdf]

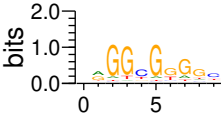

WebLogo 3.6.0

Supplement: SUPPLEMENTAL_Matl.zip [file T095111_2.00_KSHSRDERRDHQ_64.pdf › SUPPLEMENTAL_Matl/rCLAMPS/my_results/zf-C2H2_250_50_seedFFSdiverse6/0_logos_predicted_hoo/T095111_2.00_KSHSRDERRDHQ_64.pdf]



WebLogo 3.6.0

Supplement: SUPPLEMENTAL_Matl.zip [file T095116_2.00_KSHARDERRDHK_65.pdf › SUPPLEMENTAL_Matl/rCLAMPS/my_results/zf-C2H2_250_50_seedFFSdiverse6/0_logos_predicted_hoo/T095116_2.00_KSHARDERRDHK_65.pdf]

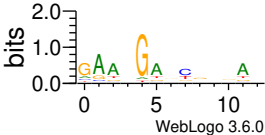

Supplement: SUPPLEMENTAL_Matl.zip [file T095119_2.00_QSALRSIQQSGNQSNR_66.pdf › SUPPLEMENTAL_Matl/rCLAMPS/my_results/zf-C2H2_250_50_seedFFSdiverse6/0_logos_predicted_hoo/T095119_2.00_QSALRSIQQSGNQSNR_66.pdf]

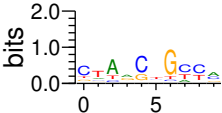

WebLogo 3.6.0

Supplement: SUPPLEMENTAL_Matl.zip [file T095121_2.00_YRMRDFDRQCSS_67.pdf › SUPPLEMENTAL_Matl/rCLAMPS/my_results/zf-C2H2_250_50_seedFFSdiverse6/0_logos_predicted_hoo/T095121_2.00_YRMRDFDRQCSS_67.pdf]



WebLogo 3.6.0

Supplement: SUPPLEMENTAL_Matl.zip [file T095122_2.00_KSHARDERRDHK_68.pdf › SUPPLEMENTAL_Matl/rCLAMPS/my_results/zf-C2H2_250_50_seedFFSdiverse6/0_logos_predicted_hoo/T095122_2.00_KSHARDERRDHK_68.pdf]

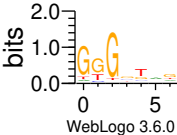

Supplement: SUPPLEMENTAL_Matl.zip [file T095129_2.00_SGARSPGR_69.pdf › SUPPLEMENTAL_Matl/rCLAMPS/my_results/zf-C2H2_250_50_seedFFSdiverse6/0_logos_predicted_hoo/T095129_2.00_SGARSPGR_69.pdf]

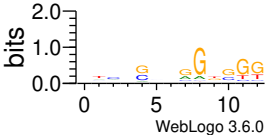

Supplement: SUPPLEMENTAL_Matl.zip [file T095134_2.00_AYKIRENINSDKDSSK_70.pdf › SUPPLEMENTAL_Matl/rCLAMPS/my_results/zf-C2H2_250_50_seedFFSdiverse6/0_logos_predicted_hoo/T095134_2.00_AYKIRENINSDKDSSK_70.pdf]

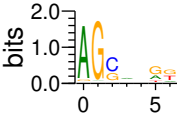

WebLogo 3.6.0

Supplement: SUPPLEMENTAL_Matl.zip [file T095156_2.00_LEYKNQFS_71.pdf › SUPPLEMENTAL_Matl/rCLAMPS/my_results/zf-C2H2_250_50_seedFFSdiverse6/0_logos_predicted_hoo/T095156_2.00_LEYKNQFS_71.pdf]

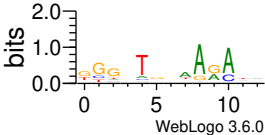

Supplement: SUPPLEMENTAL_Matl.zip [file T095163_2.00_YSFRYLHKRSSTKSGK_72.pdf › SUPPLEMENTAL_Matl/rCLAMPS/my_results/zf-C2H2_250_50_seedFFSdiverse6/0_logos_predicted_hoo/T095163_2.00_YSFRYLHKRSSTKSGK_72.pdf]

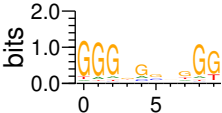

Supplement: SUPPLEMENTAL_Matl.zip [file T095173_2.00_RDKVHYDNRDHR_73.pdf › SUPPLEMENTAL_Matl/rCLAMPS/my_results/zf-C2H2_250_50_seedFFSdiverse6/0_logos_predicted_hoo/T095173_2.00_RDKVHYDNRDHR_73.pdf]

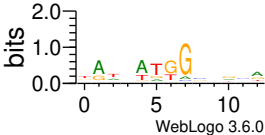

Supplement: SUPPLEMENTAL_Matl.zip [file T095174_2.00_NAAKESKRLFNTQNNA_74.pdf › SUPPLEMENTAL_Matl/rCLAMPS/my_results/zf-C2H2_250_50_seedFFSdiverse6/0_logos_predicted_hoo/T095174_2.00_NAAKESKRLFNTQNNA_74.pdf]



Supplement: SUPPLEMENTAL_Matl.zip [file T095176_2.00_RDERRDHTRDER_75.pdf › SUPPLEMENTAL_Matl/rCLAMPS/my_results/zf-C2H2_250_50_seedFFSdiverse6/0_logos_predicted_hoo/T095176_2.00_RDERRDHTRDER_75.pdf]

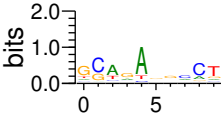

WebLogo 3.6.0

Supplement: SUPPLEMENTAL_Matl.zip [file T095177_2.00_CYTRYHNRQGDR_76.pdf › SUPPLEMENTAL_Matl/rCLAMPS/my_results/zf-C2H2_250_50_seedFFSdiverse6/0_logos_predicted_hoo/T095177_2.00_CYTRYHNRQGDR_76.pdf]

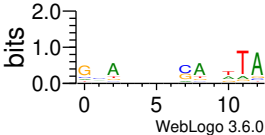

Supplement: SUPPLEMENTAL_Matl.zip [file T095190_2.00_YCHAQSDVHTNSQSTR_77.pdf › SUPPLEMENTAL_Matl/rCLAMPS/my_results/zf-C2H2_250_50_seedFFSdiverse6/0_logos_predicted_hoo/T095190_2.00_YCHAQSDVHTNSQSTR_77.pdf]

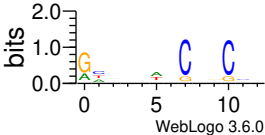

Supplement: SUPPLEMENTAL_Matl.zip [file T095203_2.00_HTDRHSDKCSNKYSCR_78.pdf › SUPPLEMENTAL_Matl/rCLAMPS/my_results/zf-C2H2_250_50_seedFFSdiverse6/0_logos_predicted_hoo/T095203_2.00_HTDRHSDKCSNKYSCR_78.pdf]

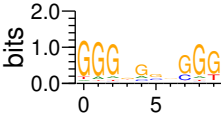

Supplement: SUPPLEMENTAL_Matl.zip [file T095225_2.00_RDKIHYDNRDHR_79.pdf › SUPPLEMENTAL_Matl/rCLAMPS/my_results/zf-C2H2_250_50_seedFFSdiverse6/0_logos_predicted_hoo/T095225_2.00_RDKIHYDNRDHR_79.pdf]

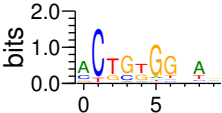

WebLogo 3.6.0

Supplement: SUPPLEMENTAL_Matl.zip [file T095232_2.00_QGSRRDQYFAIQ_80.pdf › SUPPLEMENTAL_Matl/rCLAMPS/my_results/zf-C2H2_250_50_seedFFSdiverse6/0_logos_predicted_hoo/T095232_2.00_QGSRRDQYFAIQ_80.pdf]



WebLogo 3.6.0

Supplement: SUPPLEMENTAL_Matl.zip [file T095233_2.00_KSHARDERRDHK_81.pdf › SUPPLEMENTAL_Matl/rCLAMPS/my_results/zf-C2H2_250_50_seedFFSdiverse6/0_logos_predicted_hoo/T095233_2.00_KSHARDERRDHK_81.pdf]

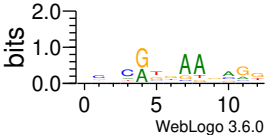

Supplement: SUPPLEMENTAL_Matl.zip [file T095243_2.00_HENRQKNRASTDHSAK_82.pdf › SUPPLEMENTAL_Matl/rCLAMPS/my_results/zf-C2H2_250_50_seedFFSdiverse6/0_logos_predicted_hoo/T095243_2.00_HENRQKNRASTDHSAK_82.pdf]

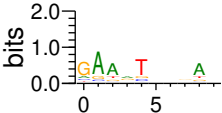

WebLogo 3.6.0

Supplement: SUPPLEMENTAL_Matl.zip [file T095250_2.00_QSALRAIQQSNR_83.pdf › SUPPLEMENTAL_Matl/rCLAMPS/my_results/zf-C2H2_250_50_seedFFSdiverse6/0_logos_predicted_hoo/T095250_2.00_QSALRAIQQSNR_83.pdf]

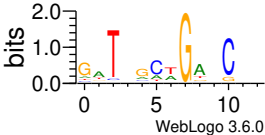

Supplement: SUPPLEMENTAL_Matl.zip [file T095320_2.00_HSDKQSHGGTGQVSAR_84.pdf › SUPPLEMENTAL_Matl/rCLAMPS/my_results/zf-C2H2_250_50_seedFFSdiverse6/0_logos_predicted_hoo/T095320_2.00_HSDKQSHGGTGQVSAR_84.pdf]

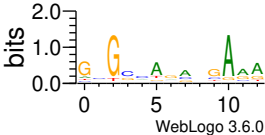

Supplement: SUPPLEMENTAL_Matl.zip [file T095409_2.00_GEKFHSNRQSTDHPAR_85.pdf › SUPPLEMENTAL_Matl/rCLAMPS/my_results/zf-C2H2_250_50_seedFFSdiverse6/0_logos_predicted_hoo/T095409_2.00_GEKFHSNRQSTDHPAR_85.pdf]

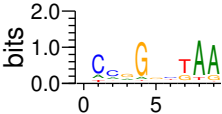

WebLogo 3.6.0

Supplement: SUPPLEMENTAL_Matl.zip [file T095424_2.00_SLRSRSHRDAEQ_86.pdf › SUPPLEMENTAL_Matl/rCLAMPS/my_results/zf-C2H2_250_50_seedFFSdiverse6/0_logos_predicted_hoo/T095424_2.00_SLRSRSHRDAEQ_86.pdf]

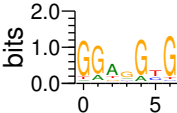

WebLogo 3.6.0

Supplement: SUPPLEMENTAL_Matl.zip [file T095441_2.00_NFHRQSHR_87.pdf › SUPPLEMENTAL_Matl/rCLAMPS/my_results/zf-C2H2_250_50_seedFFSdiverse6/0_logos_predicted_hoo/T095441_2.00_NFHRQSHR_87.pdf]



WebLogo 3.6.0

Supplement: SUPPLEMENTAL_Matl.zip [file T095444_2.00_KSHARDERRDHK_88.pdf › SUPPLEMENTAL_Matl/rCLAMPS/my_results/zf-C2H2_250_50_seedFFSdiverse6/0_logos_predicted_hoo/T095444_2.00_KSHARDERRDHK_88.pdf]

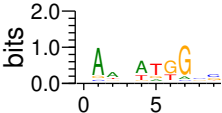

WebLogo 3.6.0

Supplement: SUPPLEMENTAL_Matl.zip [file T095455_2.00_ESKRLFNTQTNT_89.pdf › SUPPLEMENTAL_Matl/rCLAMPS/my_results/zf-C2H2_250_50_seedFFSdiverse6/0_logos_predicted_hoo/T095455_2.00_ESKRLFNTQTNT_89.pdf]



WebLogo 3.6.0

Supplement: SUPPLEMENTAL_Matl.zip [file T095489_2.00_KSHSRDERRDHK_90.pdf › SUPPLEMENTAL_Matl/rCLAMPS/my_results/zf-C2H2_250_50_seedFFSdiverse6/0_logos_predicted_hoo/T095489_2.00_KSHSRDERRDHK_90.pdf]



WebLogo 3.6.0

Supplement: SUPPLEMENTAL_Matl.zip [file T100966_2.00_KSHARDERRDHL_91.pdf › SUPPLEMENTAL_Matl/rCLAMPS/my_results/zf-C2H2_250_50_seedFFSdiverse6/0_logos_predicted_hoo/T100966_2.00_KSHARDERRDHL_91.pdf]



WebLogo 3.6.0

Supplement: SUPPLEMENTAL_Matl.zip [file T100977_2.00_KSHARDERRDHL_92.pdf › SUPPLEMENTAL_Matl/rCLAMPS/my_results/zf-C2H2_250_50_seedFFSdiverse6/0_logos_predicted_hoo/T100977_2.00_KSHARDERRDHL_92.pdf]



WebLogo 3.6.0

Supplement: SUPPLEMENTAL_Matl.zip [file T100982_2.00_KSHARDERRDHL_93.pdf › SUPPLEMENTAL_Matl/rCLAMPS/my_results/zf-C2H2_250_50_seedFFSdiverse6/0_logos_predicted_hoo/T100982_2.00_KSHARDERRDHL_93.pdf]

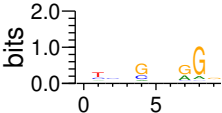

Supplement: SUPPLEMENTAL_Matl.zip [file T100997_2.00_RENINSDKDSSK_94.pdf › SUPPLEMENTAL_Matl/rCLAMPS/my_results/zf-C2H2_250_50_seedFFSdiverse6/0_logos_predicted_hoo/T100997_2.00_RENINSDKDSSK_94.pdf]

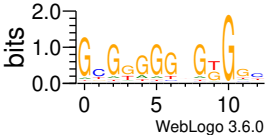

Supplement: SUPPLEMENTAL_Matl.zip [file T100999_2.00_KSHMRDQRRDHTRDER_95.pdf › SUPPLEMENTAL_Matl/rCLAMPS/my_results/zf-C2H2_250_50_seedFFSdiverse6/0_logos_predicted_hoo/T100999_2.00_KSHMRDQRRDHTRDER_95.pdf]



WebLogo 3.6.0

Supplement: SUPPLEMENTAL_Matl.zip [file T101006_2.00_KSLARDERRDHK_96.pdf › SUPPLEMENTAL_Matl/rCLAMPS/my_results/zf-C2H2_250_50_seedFFSdiverse6/0_logos_predicted_hoo/T101006_2.00_KSLARDERRDHK_96.pdf]

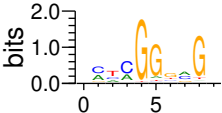

WebLogo 3.6.0

Supplement: SUPPLEMENTAL_Matl.zip [file T101029_2.00_KYNIRDHDQRTV_97.pdf › SUPPLEMENTAL_Matl/rCLAMPS/my_results/zf-C2H2_250_50_seedFFSdiverse6/0_logos_predicted_hoo/T101029_2.00_KYNIRDHDQRTV_97.pdf]



WebLogo 3.6.0

Supplement: SUPPLEMENTAL_Matl.zip [file T101053_2.00_KSHARDERRDHK_98.pdf › SUPPLEMENTAL_Matl/rCLAMPS/my_results/zf-C2H2_250_50_seedFFSdiverse6/0_logos_predicted_hoo/T101053_2.00_KSHARDERRDHK_98.pdf]



WebLogo 3.6.0

Supplement: SUPPLEMENTAL_Matl.zip [file T101059_2.00_KSHARDERRDHL_99.pdf › SUPPLEMENTAL_Matl/rCLAMPS/my_results/zf-C2H2_250_50_seedFFSdiverse6/0_logos_predicted_hoo/T101059_2.00_KSHARDERRDHL_99.pdf]



WebLogo 3.6.0

Supplement: SUPPLEMENTAL_Matl.zip [file T101064_2.00_KSHARDERRDHK_100.pdf › SUPPLEMENTAL_Matl/rCLAMPS/my_results/zf-C2H2_250_50_seedFFSdiverse6/0_logos_predicted_hoo/T101064_2.00_KSHARDERRDHK_100.pdf]



Supplement: SUPPLEMENTAL_Matl.zip [file T101071_2.00_RDKIHYDNKDHR_101.pdf › SUPPLEMENTAL_Matl/rCLAMPS/my_results/zf-C2H2_250_50_seedFFSdiverse6/0_logos_predicted_hoo/T101071_2.00_RDKIHYDNKDHR_101.pdf]



WebLogo 3.6.0

Supplement: SUPPLEMENTAL_Matl.zip [file T101081_2.00_KSHARDERRDHL_102.pdf › SUPPLEMENTAL_Matl/rCLAMPS/my_results/zf-C2H2_250_50_seedFFSdiverse6/0_logos_predicted_hoo/T101081_2.00_KSHARDERRDHL_102.pdf]



WebLogo 3.6.0

Supplement: SUPPLEMENTAL_Matl.zip [file T101089_2.00_KSHARDERRDHK_103.pdf › SUPPLEMENTAL_Matl/rCLAMPS/my_results/zf-C2H2_250_50_seedFFSdiverse6/0_logos_predicted_hoo/T101089_2.00_KSHARDERRDHK_103.pdf]



Supplement: SUPPLEMENTAL_Matl.zip [file T101113_2.00_RDERRDHTRDER_104.pdf › SUPPLEMENTAL_Matl/rCLAMPS/my_results/zf-C2H2_250_50_seedFFSdiverse6/0_logos_predicted_hoo/T101113_2.00_RDERRDHTRDER_104.pdf]



Supplement: SUPPLEMENTAL_Matl.zip [file T101144_2.00_RDERRDHTRDER_105.pdf › SUPPLEMENTAL_Matl/rCLAMPS/my_results/zf-C2H2_250_50_seedFFSdiverse6/0_logos_predicted_hoo/T101144_2.00_RDERRDHTRDER_105.pdf]



Supplement: SUPPLEMENTAL_Matl.zip [file T101147_2.00_RDERRDHTRDER_106.pdf › SUPPLEMENTAL_Matl/rCLAMPS/my_results/zf-C2H2_250_50_seedFFSdiverse6/0_logos_predicted_hoo/T101147_2.00_RDERRDHTRDER_106.pdf]

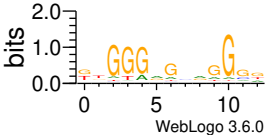

Supplement: SUPPLEMENTAL_Matl.zip [file T101166_2.00_SYHRQYLRQYHRRDRK_107.pdf › SUPPLEMENTAL_Matl/rCLAMPS/my_results/zf-C2H2_250_50_seedFFSdiverse6/0_logos_predicted_hoo/T101166_2.00_SYHRQYLRQYHRRDRK_107.pdf]



WebLogo 3.6.0

Supplement: SUPPLEMENTAL_Matl.zip [file T101167_2.00_KSHARDERRDHL_108.pdf › SUPPLEMENTAL_Matl/rCLAMPS/my_results/zf-C2H2_250_50_seedFFSdiverse6/0_logos_predicted_hoo/T101167_2.00_KSHARDERRDHL_108.pdf]



WebLogo 3.6.0

Supplement: SUPPLEMENTAL_Matl.zip [file T101215_2.00_SYHRQYHRRDRR_109.pdf › SUPPLEMENTAL_Matl/rCLAMPS/my_results/zf-C2H2_250_50_seedFFSdiverse6/0_logos_predicted_hoo/T101215_2.00_SYHRQYHRRDRR_109.pdf]



WebLogo 3.6.0

Supplement: SUPPLEMENTAL_Matl.zip [file T101230_2.00_LEYKNQFS_110.pdf › SUPPLEMENTAL_Matl/rCLAMPS/my_results/zf-C2H2_250_50_seedFFSdiverse6/0_logos_predicted_hoo/T101230_2.00_LEYKNQFS_110.pdf]



WebLogo 3.6.0

Supplement: SUPPLEMENTAL_Matl.zip [file T101294_2.00_KSHARDERRDHL_111.pdf › SUPPLEMENTAL_Matl/rCLAMPS/my_results/zf-C2H2_250_50_seedFFSdiverse6/0_logos_predicted_hoo/T101294_2.00_KSHARDERRDHL_111.pdf]

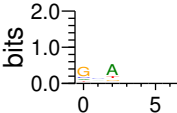

WebLogo 3.6.0

Supplement: SUPPLEMENTAL_Matl.zip [file T101295_2.00_HTNSQSTR_112.pdf › SUPPLEMENTAL_Matl/rCLAMPS/my_results/zf-C2H2_250_50_seedFFSdiverse6/0_logos_predicted_hoo/T101295_2.00_HTNSQSTR_112.pdf]



WebLogo 3.6.0

Supplement: SUPPLEMENTAL_Matl.zip [file T101360_2.00_KSHARDERRDHK_113.pdf › SUPPLEMENTAL_Matl/rCLAMPS/my_results/zf-C2H2_250_50_seedFFSdiverse6/0_logos_predicted_hoo/T101360_2.00_KSHARDERRDHK_113.pdf]



Supplement: SUPPLEMENTAL_Matl.zip [file T101423_2.00_SGARSPGR_114.pdf › SUPPLEMENTAL_Matl/rCLAMPS/my_results/zf-C2H2_250_50_seedFFSdiverse6/0_logos_predicted_hoo/T101423_2.00_SGARSPGR_114.pdf]

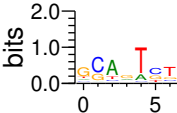

WebLogo 3.6.0

Supplement: SUPPLEMENTAL_Matl.zip [file T101455_2.00_CYTRQGDR_115.pdf › SUPPLEMENTAL_Matl/rCLAMPS/my_results/zf-C2H2_250_50_seedFFSdiverse6/0_logos_predicted_hoo/T101455_2.00_CYTRQGDR_115.pdf]



WebLogo 3.6.0

Supplement: SUPPLEMENTAL_Matl.zip [file T101456_2.00_KSHARDERRDHL_116.pdf › SUPPLEMENTAL_Matl/rCLAMPS/my_results/zf-C2H2_250_50_seedFFSdiverse6/0_logos_predicted_hoo/T101456_2.00_KSHARDERRDHL_116.pdf]



WebLogo 3.6.0

Supplement: SUPPLEMENTAL_Matl.zip [file T101496_2.00_KSHARDERRDHK_117.pdf › SUPPLEMENTAL_Matl/rCLAMPS/my_results/zf-C2H2_250_50_seedFFSdiverse6/0_logos_predicted_hoo/T101496_2.00_KSHARDERRDHK_117.pdf]

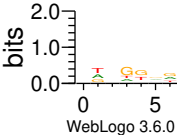

Supplement: SUPPLEMENTAL_Matl.zip [file T114387_2.00_STRRSNSN_118.pdf › SUPPLEMENTAL_Matl/rCLAMPS/my_results/zf-C2H2_250_50_seedFFSdiverse6/0_logos_predicted_hoo/T114387_2.00_STRRSNSN_118.pdf]

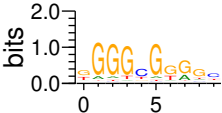

WebLogo 3.6.0

Supplement: SUPPLEMENTAL_Matl.zip [file T114388_2.00_KSHTRDERRDHK_119.pdf › SUPPLEMENTAL_Matl/rCLAMPS/my_results/zf-C2H2_250_50_seedFFSdiverse6/0_logos_predicted_hoo/T114388_2.00_KSHTRDERRDHK_119.pdf]

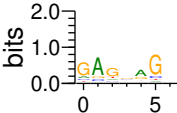

Supplement: SUPPLEMENTAL_Matl.zip [file T114396_2.00_RYNRKSNR_120.pdf › SUPPLEMENTAL_Matl/rCLAMPS/my_results/zf-C2H2_250_50_seedFFSdiverse6/0_logos_predicted_hoo/T114396_2.00_RYNRKSNR_120.pdf]

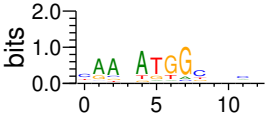

Supplement: SUPPLEMENTAL_Matl.zip [file T114401_2.00_DSAKESKRLFNTQTNS_121.pdf › SUPPLEMENTAL_Matl/rCLAMPS/my_results/zf-C2H2_250_50_seedFFSdiverse6/0_logos_predicted_hoo/T114401_2.00_DSAKESKRLFNTQTNS_121.pdf]

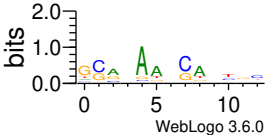

Supplement: SUPPLEMENTAL_Matl.zip [file T114402_2.00_RSTTQSDKQSNTRVDR_122.pdf › SUPPLEMENTAL_Matl/rCLAMPS/my_results/zf-C2H2_250_50_seedFFSdiverse6/0_logos_predicted_hoo/T114402_2.00_RSTTQSDKQSNTRVDR_122.pdf]

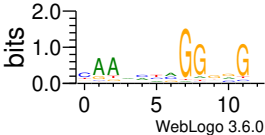

Supplement: SUPPLEMENTAL_Matl.zip [file T114403_2.00_KYNIRDHDQRTVQANS_123.pdf › SUPPLEMENTAL_Matl/rCLAMPS/my_results/zf-C2H2_250_50_seedFFSdiverse6/0_logos_predicted_hoo/T114403_2.00_KYNIRDHDQRTVQANS_123.pdf]

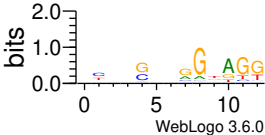

Supplement: SUPPLEMENTAL_Matl.zip [file T114404_2.00_AYKNRENINSDKHSSK_124.pdf › SUPPLEMENTAL_Matl/rCLAMPS/my_results/zf-C2H2_250_50_seedFFSdiverse6/0_logos_predicted_hoo/T114404_2.00_AYKNRENINSDKHSSK_124.pdf]



Supplement: SUPPLEMENTAL_Matl.zip [file T114409_2.00_RDERRDHTRDER_125.pdf › SUPPLEMENTAL_Matl/rCLAMPS/my_results/zf-C2H2_250_50_seedFFSdiverse6/0_logos_predicted_hoo/T114409_2.00_RDERRDHTRDER_125.pdf]

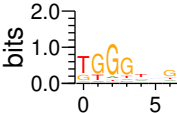

Supplement: SUPPLEMENTAL_Matl.zip [file T114414_2.00_NYSRRDKN_126.pdf › SUPPLEMENTAL_Matl/rCLAMPS/my_results/zf-C2H2_250_50_seedFFSdiverse6/0_logos_predicted_hoo/T114414_2.00_NYSRRDKN_126.pdf]

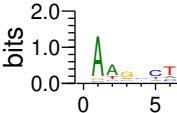

WebLogo 3.6.0

Supplement: SUPPLEMENTAL_Matl.zip [file T114423_2.00_WSTRQGNV_127.pdf › SUPPLEMENTAL_Matl/rCLAMPS/my_results/zf-C2H2_250_50_seedFFSdiverse6/0_logos_predicted_hoo/T114423_2.00_WSTRQGNV_127.pdf]

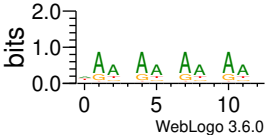

Supplement: SUPPLEMENTAL_Matl.zip [file T114425_2.00_QSTNQSTNQSTNQSTN_128.pdf › SUPPLEMENTAL_Matl/rCLAMPS/my_results/zf-C2H2_250_50_seedFFSdiverse6/0_logos_predicted_hoo/T114425_2.00_QSTNQSTNQSTNQSTN_128.pdf]

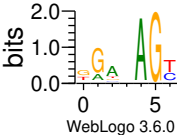

Supplement: SUPPLEMENTAL_Matl.zip [file T114428_2.00_MWNTQAHK_129.pdf › SUPPLEMENTAL_Matl/rCLAMPS/my_results/zf-C2H2_250_50_seedFFSdiverse6/0_logos_predicted_hoo/T114428_2.00_MWNTQAHK_129.pdf]

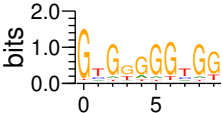

WebLogo 3.6.0

Supplement: SUPPLEMENTAL_Matl.zip [file T114435_2.00_RDMRRDHTRDMR_130.pdf › SUPPLEMENTAL_Matl/rCLAMPS/my_results/zf-C2H2_250_50_seedFFSdiverse6/0_logos_predicted_hoo/T114435_2.00_RDMRRDHTRDMR_130.pdf]



WebLogo 3.6.0

Supplement: SUPPLEMENTAL_Matl.zip [file T114442_2.00_KSHARDERRDHK_131.pdf › SUPPLEMENTAL_Matl/rCLAMPS/my_results/zf-C2H2_250_50_seedFFSdiverse6/0_logos_predicted_hoo/T114442_2.00_KSHARDERRDHK_131.pdf]

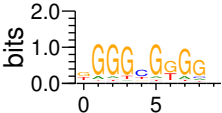

WebLogo 3.6.0

Supplement: SUPPLEMENTAL_Matl.zip [file T114453_2.00_KAHARDERRDHK_132.pdf › SUPPLEMENTAL_Matl/rCLAMPS/my_results/zf-C2H2_250_50_seedFFSdiverse6/0_logos_predicted_hoo/T114453_2.00_KAHARDERRDHK_132.pdf]

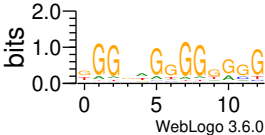

Supplement: SUPPLEMENTAL_Matl.zip [file T114531_2.00_EELVRDHRREQLRDHK_133.pdf › SUPPLEMENTAL_Matl/rCLAMPS/my_results/zf-C2H2_250_50_seedFFSdiverse6/0_logos_predicted_hoo/T114531_2.00_EELVRDHRREQLRDHK_133.pdf]



WebLogo 3.6.0

Supplement: SUPPLEMENTAL_Matl.zip [file T114580_2.00_KSHARDERRDHK_134.pdf › SUPPLEMENTAL_Matl/rCLAMPS/my_results/zf-C2H2_250_50_seedFFSdiverse6/0_logos_predicted_hoo/T114580_2.00_KSHARDERRDHK_134.pdf]



WebLogo 3.6.0

Supplement: SUPPLEMENTAL_Matl.zip [file T114591_2.00_KSHARDERRDHL_135.pdf › SUPPLEMENTAL_Matl/rCLAMPS/my_results/zf-C2H2_250_50_seedFFSdiverse6/0_logos_predicted_hoo/T114591_2.00_KSHARDERRDHL_135.pdf]



WebLogo 3.6.0

Supplement: SUPPLEMENTAL_Matl.zip [file T114596_2.00_KSHARDERRDHK_136.pdf › SUPPLEMENTAL_Matl/rCLAMPS/my_results/zf-C2H2_250_50_seedFFSdiverse6/0_logos_predicted_hoo/T114596_2.00_KSHARDERRDHK_136.pdf]

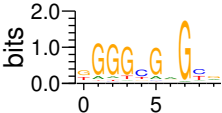

WebLogo 3.6.0

Supplement: SUPPLEMENTAL_Matl.zip [file T117214_2.00_NGQGREERRDHK_137.pdf › SUPPLEMENTAL_Matl/rCLAMPS/my_results/zf-C2H2_250_50_seedFFSdiverse6/0_logos_predicted_hoo/T117214_2.00_NGQGREERRDHK_137.pdf]



WebLogo 3.6.0

Supplement: SUPPLEMENTAL_Matl.zip [file T117220_2.00_KSHARDERRDHL_138.pdf › SUPPLEMENTAL_Matl/rCLAMPS/my_results/zf-C2H2_250_50_seedFFSdiverse6/0_logos_predicted_hoo/T117220_2.00_KSHARDERRDHL_138.pdf]



WebLogo 3.6.0

Supplement: SUPPLEMENTAL_Matl.zip [file T117225_2.00_KSHARDERRDHL_139.pdf › SUPPLEMENTAL_Matl/rCLAMPS/my_results/zf-C2H2_250_50_seedFFSdiverse6/0_logos_predicted_hoo/T117225_2.00_KSHARDERRDHL_139.pdf]

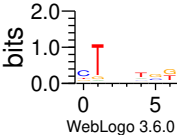

Supplement: SUPPLEMENTAL_Matl.zip [file T117228_2.00_SHTTSNSS_140.pdf › SUPPLEMENTAL_Matl/rCLAMPS/my_results/zf-C2H2_250_50_seedFFSdiverse6/0_logos_predicted_hoo/T117228_2.00_SHTTSNSS_140.pdf]

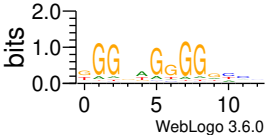

Supplement: SUPPLEMENTAL_Matl.zip [file T117232_2.00_DSLQRDHRREQLRDHK_141.pdf › SUPPLEMENTAL_Matl/rCLAMPS/my_results/zf-C2H2_250_50_seedFFSdiverse6/0_logos_predicted_hoo/T117232_2.00_DSLQRDHRREQLRDHK_141.pdf]

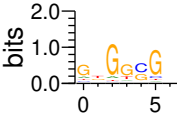

Supplement: SUPPLEMENTAL_Matl.zip [file T117435_2.00_RYDRRDAR_142.pdf › SUPPLEMENTAL_Matl/rCLAMPS/my_results/zf-C2H2_250_50_seedFFSdiverse6/0_logos_predicted_hoo/T117435_2.00_RYDRRDAR_142.pdf]

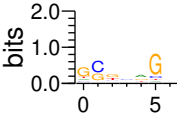

WebLogo 3.6.0

Supplement: SUPPLEMENTAL_Matl.zip [file T117456_2.00_RINSRNDR_143.pdf › SUPPLEMENTAL_Matl/rCLAMPS/my_results/zf-C2H2_250_50_seedFFSdiverse6/0_logos_predicted_hoo/T117456_2.00_RINSRNDR_143.pdf]

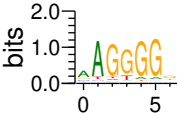

WebLogo 3.6.0

Supplement: SUPPLEMENTAL_Matl.zip [file T119084_2.00_REHRRDNQ_144.pdf › SUPPLEMENTAL_Matl/rCLAMPS/my_results/zf-C2H2_250_50_seedFFSdiverse6/0_logos_predicted_hoo/T119084_2.00_REHRRDNQ_144.pdf]

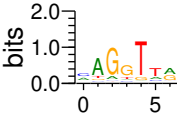

WebLogo 3.6.0

Supplement: SUPPLEMENTAL_Matl.zip [file T119099_2.00_YGGRRENE_145.pdf › SUPPLEMENTAL_Matl/rCLAMPS/my_results/zf-C2H2_250_50_seedFFSdiverse6/0_logos_predicted_hoo/T119099_2.00_YGGRRENE_145.pdf]

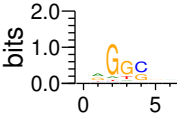

WebLogo 3.6.0

Supplement: SUPPLEMENTAL_Matl.zip [file T119105_2.00_RADRRDHE_146.pdf › SUPPLEMENTAL_Matl/rCLAMPS/my_results/zf-C2H2_250_50_seedFFSdiverse6/0_logos_predicted_hoo/T119105_2.00_RADRRDHE_146.pdf]



WebLogo 3.6.0

Supplement: SUPPLEMENTAL_Matl.zip [file T120680_2.00_REHRRDNQ_147.pdf › SUPPLEMENTAL_Matl/rCLAMPS/my_results/zf-C2H2_250_50_seedFFSdiverse6/0_logos_predicted_hoo/T120680_2.00_REHRRDNQ_147.pdf]



WebLogo 3.6.0

Supplement: SUPPLEMENTAL_Matl.zip [file T120698_2.00_REHRRDNQ_148.pdf › SUPPLEMENTAL_Matl/rCLAMPS/my_results/zf-C2H2_250_50_seedFFSdiverse6/0_logos_predicted_hoo/T120698_2.00_REHRRDNQ_148.pdf]



WebLogo 3.6.0

Supplement: SUPPLEMENTAL_Matl.zip [file T120801_2.00_REHRRDNQ_149.pdf › SUPPLEMENTAL_Matl/rCLAMPS/my_results/zf-C2H2_250_50_seedFFSdiverse6/0_logos_predicted_hoo/T120801_2.00_REHRRDNQ_149.pdf]
