# Supplementary figures and images for: Learning probabilistic protein–DNA recognition codes from DNA-binding specificities using structural mappings (part 15 of 25)
Source: HighWire-hosted journal article supplement (doi:10.1101/gr.276606.122), 2022-09-01

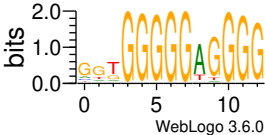

Supplement: SUPPLEMENTAL_Matl.zip [file T101166_2.00_SYHRQYLRQYHRRDRK_107.pdf › SUPPLEMENTAL_Matl/rCLAMPS/my_results/zf-C2H2_250_50_seedFFSdiverse6/0_logos_aligned_hoo/T101166_2.00_SYHRQYLRQYHRRDRK_107.pdf]

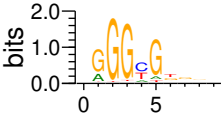

WebLogo 3.6.0

Supplement: SUPPLEMENTAL_Matl.zip [file T101167_2.00_KSHARDERRDHL_108.pdf › SUPPLEMENTAL_Matl/rCLAMPS/my_results/zf-C2H2_250_50_seedFFSdiverse6/0_logos_aligned_hoo/T101167_2.00_KSHARDERRDHL_108.pdf]

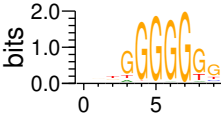

Supplement: SUPPLEMENTAL_Matl.zip [file T101215_2.00_SYHRQYHRRDRR_109.pdf › SUPPLEMENTAL_Matl/rCLAMPS/my_results/zf-C2H2_250_50_seedFFSdiverse6/0_logos_aligned_hoo/T101215_2.00_SYHRQYHRRDRR_109.pdf]

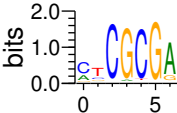

WebLogo 3.6.0

Supplement: SUPPLEMENTAL_Matl.zip [file T101230_2.00_LEYKNQFS_110.pdf › SUPPLEMENTAL_Matl/rCLAMPS/my_results/zf-C2H2_250_50_seedFFSdiverse6/0_logos_aligned_hoo/T101230_2.00_LEYKNQFS_110.pdf]

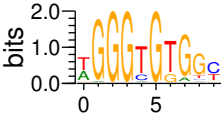

WebLogo 3.6.0

Supplement: SUPPLEMENTAL_Matl.zip [file T101294_2.00_KSHARDERRDHL_111.pdf › SUPPLEMENTAL_Matl/rCLAMPS/my_results/zf-C2H2_250_50_seedFFSdiverse6/0_logos_aligned_hoo/T101294_2.00_KSHARDERRDHL_111.pdf]

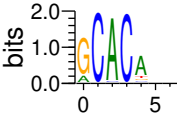

WebLogo 3.6.0

Supplement: SUPPLEMENTAL_Matl.zip [file T101295_2.00_HTNSQSTR_112.pdf › SUPPLEMENTAL_Matl/rCLAMPS/my_results/zf-C2H2_250_50_seedFFSdiverse6/0_logos_aligned_hoo/T101295_2.00_HTNSQSTR_112.pdf]

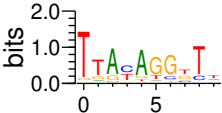

WebLogo 3.6.0

Supplement: SUPPLEMENTAL_Matl.zip [file T101360_2.00_KSHARDERRDHK_113.pdf › SUPPLEMENTAL_Matl/rCLAMPS/my_results/zf-C2H2_250_50_seedFFSdiverse6/0_logos_aligned_hoo/T101360_2.00_KSHARDERRDHK_113.pdf]

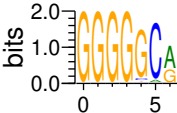

WebLogo 3.6.0

Supplement: SUPPLEMENTAL_Matl.zip [file T101423_2.00_SGARSPGR_114.pdf › SUPPLEMENTAL_Matl/rCLAMPS/my_results/zf-C2H2_250_50_seedFFSdiverse6/0_logos_aligned_hoo/T101423_2.00_SGARSPGR_114.pdf]

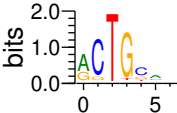

Supplement: SUPPLEMENTAL_Matl.zip [file T101455_2.00_CYTRQGDR_115.pdf › SUPPLEMENTAL_Matl/rCLAMPS/my_results/zf-C2H2_250_50_seedFFSdiverse6/0_logos_aligned_hoo/T101455_2.00_CYTRQGDR_115.pdf]

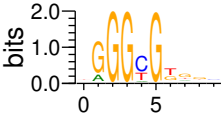

WebLogo 3.6.0

Supplement: SUPPLEMENTAL_Matl.zip [file T101456_2.00_KSHARDERRDHL_116.pdf › SUPPLEMENTAL_Matl/rCLAMPS/my_results/zf-C2H2_250_50_seedFFSdiverse6/0_logos_aligned_hoo/T101456_2.00_KSHARDERRDHL_116.pdf]

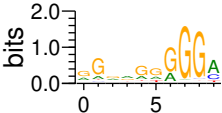

WebLogo 3.6.0

Supplement: SUPPLEMENTAL_Matl.zip [file T101496_2.00_KSHARDERRDHK_117.pdf › SUPPLEMENTAL_Matl/rCLAMPS/my_results/zf-C2H2_250_50_seedFFSdiverse6/0_logos_aligned_hoo/T101496_2.00_KSHARDERRDHK_117.pdf]

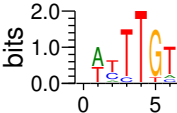

Supplement: SUPPLEMENTAL_Matl.zip [file T114387_2.00_STRRSNSN_118.pdf › SUPPLEMENTAL_Matl/rCLAMPS/my_results/zf-C2H2_250_50_seedFFSdiverse6/0_logos_aligned_hoo/T114387_2.00_STRRSNSN_118.pdf]

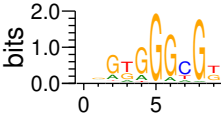

Supplement: SUPPLEMENTAL_Matl.zip [file T114388_2.00_KSHTRDERRDHK_119.pdf › SUPPLEMENTAL_Matl/rCLAMPS/my_results/zf-C2H2_250_50_seedFFSdiverse6/0_logos_aligned_hoo/T114388_2.00_KSHTRDERRDHK_119.pdf]

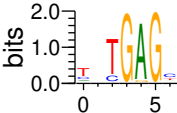

Supplement: SUPPLEMENTAL_Matl.zip [file T114396_2.00_RYNRKSNR_120.pdf › SUPPLEMENTAL_Matl/rCLAMPS/my_results/zf-C2H2_250_50_seedFFSdiverse6/0_logos_aligned_hoo/T114396_2.00_RYNRKSNR_120.pdf]

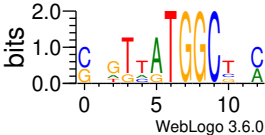

Supplement: SUPPLEMENTAL_Matl.zip [file T114401_2.00_DSAKESKRLFNTQTNS_121.pdf › SUPPLEMENTAL_Matl/rCLAMPS/my_results/zf-C2H2_250_50_seedFFSdiverse6/0_logos_aligned_hoo/T114401_2.00_DSAKESKRLFNTQTNS_121.pdf]

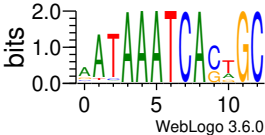

Supplement: SUPPLEMENTAL_Matl.zip [file T114402_2.00_RSTTQSDKQSNTRVDR_122.pdf › SUPPLEMENTAL_Matl/rCLAMPS/my_results/zf-C2H2_250_50_seedFFSdiverse6/0_logos_aligned_hoo/T114402_2.00_RSTTQSDKQSNTRVDR_122.pdf]

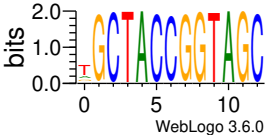

Supplement: SUPPLEMENTAL_Matl.zip [file T114403_2.00_KYNIRDHDQRTVQANS_123.pdf › SUPPLEMENTAL_Matl/rCLAMPS/my_results/zf-C2H2_250_50_seedFFSdiverse6/0_logos_aligned_hoo/T114403_2.00_KYNIRDHDQRTVQANS_123.pdf]

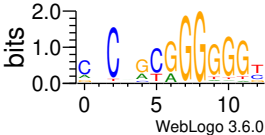

Supplement: SUPPLEMENTAL_Matl.zip [file T114404_2.00_AYKNRENINSDKHSSK_124.pdf › SUPPLEMENTAL_Matl/rCLAMPS/my_results/zf-C2H2_250_50_seedFFSdiverse6/0_logos_aligned_hoo/T114404_2.00_AYKNRENINSDKHSSK_124.pdf]

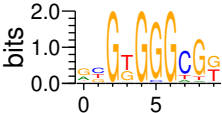

WebLogo 3.6.0

Supplement: SUPPLEMENTAL_Matl.zip [file T114409_2.00_RDERRDHTRDER_125.pdf › SUPPLEMENTAL_Matl/rCLAMPS/my_results/zf-C2H2_250_50_seedFFSdiverse6/0_logos_aligned_hoo/T114409_2.00_RDERRDHTRDER_125.pdf]

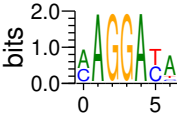

WebLogo 3.6.0

Supplement: SUPPLEMENTAL_Matl.zip [file T114414_2.00_NYSRRDKN_126.pdf › SUPPLEMENTAL_Matl/rCLAMPS/my_results/zf-C2H2_250_50_seedFFSdiverse6/0_logos_aligned_hoo/T114414_2.00_NYSRRDKN_126.pdf]

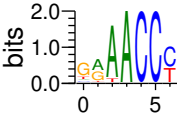

WebLogo 3.6.0

Supplement: SUPPLEMENTAL_Matl.zip [file T114423_2.00_WSTRQGNV_127.pdf › SUPPLEMENTAL_Matl/rCLAMPS/my_results/zf-C2H2_250_50_seedFFSdiverse6/0_logos_aligned_hoo/T114423_2.00_WSTRQGNV_127.pdf]

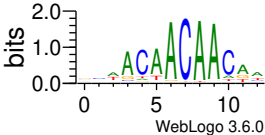

Supplement: SUPPLEMENTAL_Matl.zip [file T114425_2.00_QSTNQSTNQSTNQSTN_128.pdf › SUPPLEMENTAL_Matl/rCLAMPS/my_results/zf-C2H2_250_50_seedFFSdiverse6/0_logos_aligned_hoo/T114425_2.00_QSTNQSTNQSTNQSTN_128.pdf]

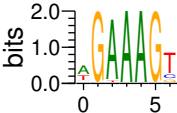

Supplement: SUPPLEMENTAL_Matl.zip [file T114428_2.00_MWNTQAHK_129.pdf › SUPPLEMENTAL_Matl/rCLAMPS/my_results/zf-C2H2_250_50_seedFFSdiverse6/0_logos_aligned_hoo/T114428_2.00_MWNTQAHK_129.pdf]

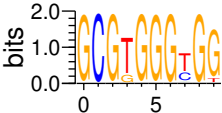

WebLogo 3.6.0

Supplement: SUPPLEMENTAL_Matl.zip [file T114435_2.00_RDMRRDHTRDMR_130.pdf › SUPPLEMENTAL_Matl/rCLAMPS/my_results/zf-C2H2_250_50_seedFFSdiverse6/0_logos_aligned_hoo/T114435_2.00_RDMRRDHTRDMR_130.pdf]

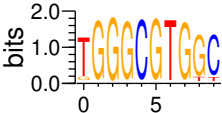

WebLogo 3.6.0

Supplement: SUPPLEMENTAL_Matl.zip [file T114442_2.00_KSHARDERRDHK_131.pdf › SUPPLEMENTAL_Matl/rCLAMPS/my_results/zf-C2H2_250_50_seedFFSdiverse6/0_logos_aligned_hoo/T114442_2.00_KSHARDERRDHK_131.pdf]

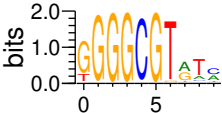

Supplement: SUPPLEMENTAL_Matl.zip [file T114453_2.00_KAHARDERRDHK_132.pdf › SUPPLEMENTAL_Matl/rCLAMPS/my_results/zf-C2H2_250_50_seedFFSdiverse6/0_logos_aligned_hoo/T114453_2.00_KAHARDERRDHK_132.pdf]

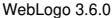

Supplement: SUPPLEMENTAL_Matl.zip [file T114531_2.00_EELVRDHRREQLRDHK_133.pdf › SUPPLEMENTAL_Matl/rCLAMPS/my_results/zf-C2H2_250_50_seedFFSdiverse6/0_logos_aligned_hoo/T114531_2.00_EELVRDHRREQLRDHK_133.pdf]

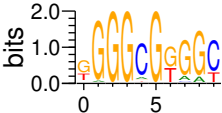

WebLogo 3.6.0

Supplement: SUPPLEMENTAL_Matl.zip [file T114580_2.00_KSHARDERRDHK_134.pdf › SUPPLEMENTAL_Matl/rCLAMPS/my_results/zf-C2H2_250_50_seedFFSdiverse6/0_logos_aligned_hoo/T114580_2.00_KSHARDERRDHK_134.pdf]

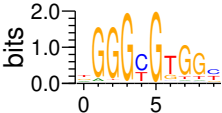

WebLogo 3.6.0

Supplement: SUPPLEMENTAL_Matl.zip [file T114591_2.00_KSHARDERRDHL_135.pdf › SUPPLEMENTAL_Matl/rCLAMPS/my_results/zf-C2H2_250_50_seedFFSdiverse6/0_logos_aligned_hoo/T114591_2.00_KSHARDERRDHL_135.pdf]

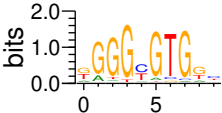

Supplement: SUPPLEMENTAL_Matl.zip [file T114596_2.00_KSHARDERRDHK_136.pdf › SUPPLEMENTAL_Matl/rCLAMPS/my_results/zf-C2H2_250_50_seedFFSdiverse6/0_logos_aligned_hoo/T114596_2.00_KSHARDERRDHK_136.pdf]

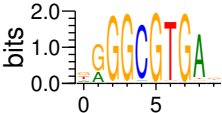

WebLogo 3.6.0

Supplement: SUPPLEMENTAL_Matl.zip [file T117214_2.00_NGQGREERRDHK_137.pdf › SUPPLEMENTAL_Matl/rCLAMPS/my_results/zf-C2H2_250_50_seedFFSdiverse6/0_logos_aligned_hoo/T117214_2.00_NGQGREERRDHK_137.pdf]

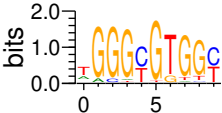

WebLogo 3.6.0

Supplement: SUPPLEMENTAL_Matl.zip [file T117220_2.00_KSHARDERRDHL_138.pdf › SUPPLEMENTAL_Matl/rCLAMPS/my_results/zf-C2H2_250_50_seedFFSdiverse6/0_logos_aligned_hoo/T117220_2.00_KSHARDERRDHL_138.pdf]

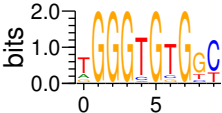

WebLogo 3.6.0

Supplement: SUPPLEMENTAL_Matl.zip [file T117225_2.00_KSHARDERRDHL_139.pdf › SUPPLEMENTAL_Matl/rCLAMPS/my_results/zf-C2H2_250_50_seedFFSdiverse6/0_logos_aligned_hoo/T117225_2.00_KSHARDERRDHL_139.pdf]

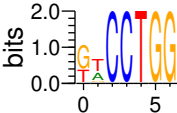

WebLogo 3.6.0

Supplement: SUPPLEMENTAL_Matl.zip [file T117228_2.00_SHTTSNSS_140.pdf › SUPPLEMENTAL_Matl/rCLAMPS/my_results/zf-C2H2_250_50_seedFFSdiverse6/0_logos_aligned_hoo/T117228_2.00_SHTTSNSS_140.pdf]

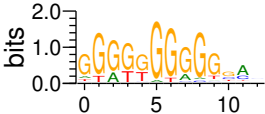

WebLogo 3.6.0

Supplement: SUPPLEMENTAL_Matl.zip [file T117232_2.00_DSLQRDHRREQLRDHK_141.pdf › SUPPLEMENTAL_Matl/rCLAMPS/my_results/zf-C2H2_250_50_seedFFSdiverse6/0_logos_aligned_hoo/T117232_2.00_DSLQRDHRREQLRDHK_141.pdf]

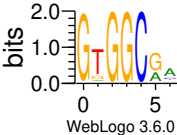

Supplement: SUPPLEMENTAL_Matl.zip [file T117435_2.00_RYDRRDAR_142.pdf › SUPPLEMENTAL_Matl/rCLAMPS/my_results/zf-C2H2_250_50_seedFFSdiverse6/0_logos_aligned_hoo/T117435_2.00_RYDRRDAR_142.pdf]

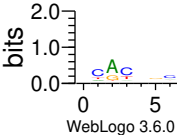

Supplement: SUPPLEMENTAL_Matl.zip [file T117456_2.00_RINSRNDR_143.pdf › SUPPLEMENTAL_Matl/rCLAMPS/my_results/zf-C2H2_250_50_seedFFSdiverse6/0_logos_aligned_hoo/T117456_2.00_RINSRNDR_143.pdf]

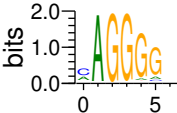

WebLogo 3.6.0

Supplement: SUPPLEMENTAL_Matl.zip [file T119084_2.00_REHRRDNQ_144.pdf › SUPPLEMENTAL_Matl/rCLAMPS/my_results/zf-C2H2_250_50_seedFFSdiverse6/0_logos_aligned_hoo/T119084_2.00_REHRRDNQ_144.pdf]

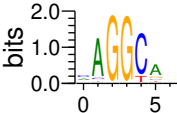

WebLogo 3.6.0

Supplement: SUPPLEMENTAL_Matl.zip [file T119099_2.00_YGGRRENE_145.pdf › SUPPLEMENTAL_Matl/rCLAMPS/my_results/zf-C2H2_250_50_seedFFSdiverse6/0_logos_aligned_hoo/T119099_2.00_YGGRRENE_145.pdf]

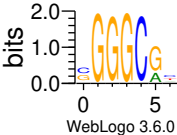

Supplement: SUPPLEMENTAL_Matl.zip [file T119105_2.00_RADRRDHE_146.pdf › SUPPLEMENTAL_Matl/rCLAMPS/my_results/zf-C2H2_250_50_seedFFSdiverse6/0_logos_aligned_hoo/T119105_2.00_RADRRDHE_146.pdf]

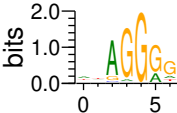

Supplement: SUPPLEMENTAL_Matl.zip [file T120680_2.00_REHRRDNQ_147.pdf › SUPPLEMENTAL_Matl/rCLAMPS/my_results/zf-C2H2_250_50_seedFFSdiverse6/0_logos_aligned_hoo/T120680_2.00_REHRRDNQ_147.pdf]

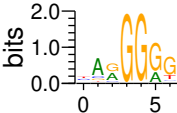

Supplement: SUPPLEMENTAL_Matl.zip [file T120698_2.00_REHRRDNQ_148.pdf › SUPPLEMENTAL_Matl/rCLAMPS/my_results/zf-C2H2_250_50_seedFFSdiverse6/0_logos_aligned_hoo/T120698_2.00_REHRRDNQ_148.pdf]

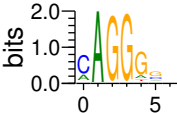

WebLogo 3.6.0

Supplement: SUPPLEMENTAL_Matl.zip [file T120801_2.00_REHRRDNQ_149.pdf › SUPPLEMENTAL_Matl/rCLAMPS/my_results/zf-C2H2_250_50_seedFFSdiverse6/0_logos_aligned_hoo/T120801_2.00_REHRRDNQ_149.pdf]

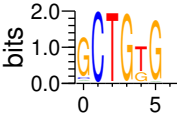

WebLogo 3.6.0

Supplement: SUPPLEMENTAL_Matl.zip [file T125863_2.00_RERYQSDR_150.pdf › SUPPLEMENTAL_Matl/rCLAMPS/my_results/zf-C2H2_250_50_seedFFSdiverse6/0_logos_aligned_hoo/T125863_2.00_RERYQSDR_150.pdf]

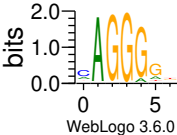

Supplement: SUPPLEMENTAL_Matl.zip [file T125870_2.00_REHRRDNQ_151.pdf › SUPPLEMENTAL_Matl/rCLAMPS/my_results/zf-C2H2_250_50_seedFFSdiverse6/0_logos_aligned_hoo/T125870_2.00_REHRRDNQ_151.pdf]

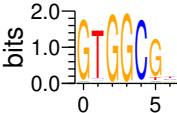

WebLogo 3.6.0

Supplement: SUPPLEMENTAL_Matl.zip [file T125880_2.00_RYDRRDAR_152.pdf › SUPPLEMENTAL_Matl/rCLAMPS/my_results/zf-C2H2_250_50_seedFFSdiverse6/0_logos_aligned_hoo/T125880_2.00_RYDRRDAR_152.pdf]

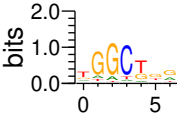

WebLogo 3.6.0

Supplement: SUPPLEMENTAL_Matl.zip [file T125883_2.00_RTASRHDR_153.pdf › SUPPLEMENTAL_Matl/rCLAMPS/my_results/zf-C2H2_250_50_seedFFSdiverse6/0_logos_aligned_hoo/T125883_2.00_RTASRHDR_153.pdf]

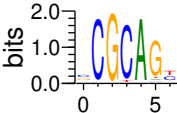

WebLogo 3.6.0

Supplement: SUPPLEMENTAL_Matl.zip [file T125893_2.00_RFNTRHDR_154.pdf › SUPPLEMENTAL_Matl/rCLAMPS/my_results/zf-C2H2_250_50_seedFFSdiverse6/0_logos_aligned_hoo/T125893_2.00_RFNTRHDR_154.pdf]

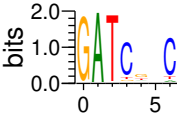

WebLogo 3.6.0

Supplement: SUPPLEMENTAL_Matl.zip [file T125909_2.00_RSSIVSNR_155.pdf › SUPPLEMENTAL_Matl/rCLAMPS/my_results/zf-C2H2_250_50_seedFFSdiverse6/0_logos_aligned_hoo/T125909_2.00_RSSIVSNR_155.pdf]

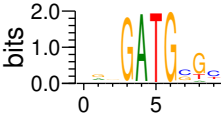

WebLogo 3.6.0

Supplement: SUPPLEMENTAL_Matl.zip [file T126264_2.00_RFARTGNRTTKR_156.pdf › SUPPLEMENTAL_Matl/rCLAMPS/my_results/zf-C2H2_250_50_seedFFSdiverse6/0_logos_aligned_hoo/T126264_2.00_RFARTGNRTTKR_156.pdf]

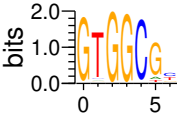

WebLogo 3.6.0

Supplement: SUPPLEMENTAL_Matl.zip [file T128342_2.00_RHDRRDAR_157.pdf › SUPPLEMENTAL_Matl/rCLAMPS/my_results/zf-C2H2_250_50_seedFFSdiverse6/0_logos_aligned_hoo/T128342_2.00_RHDRRDAR_157.pdf]

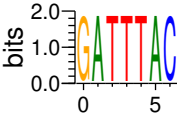

WebLogo 3.6.0

Supplement: SUPPLEMENTAL_Matl.zip [file T128344_2.00_RSTTASNR_158.pdf › SUPPLEMENTAL_Matl/rCLAMPS/my_results/zf-C2H2_250_50_seedFFSdiverse6/0_logos_aligned_hoo/T128344_2.00_RSTTASNR_158.pdf]

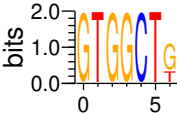

WebLogo 3.6.0

Supplement: SUPPLEMENTAL_Matl.zip [file T128346_2.00_RFSTRHDR_159.pdf › SUPPLEMENTAL_Matl/rCLAMPS/my_results/zf-C2H2_250_50_seedFFSdiverse6/0_logos_aligned_hoo/T128346_2.00_RFSTRHDR_159.pdf]

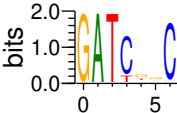

WebLogo 3.6.0

Supplement: SUPPLEMENTAL_Matl.zip [file T128357_2.00_RSSIVSNR_160.pdf › SUPPLEMENTAL_Matl/rCLAMPS/my_results/zf-C2H2_250_50_seedFFSdiverse6/0_logos_aligned_hoo/T128357_2.00_RSSIVSNR_160.pdf]

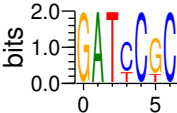

WebLogo 3.6.0

Supplement: SUPPLEMENTAL_Matl.zip [file T128381_2.00_RSTKVSNR_161.pdf › SUPPLEMENTAL_Matl/rCLAMPS/my_results/zf-C2H2_250_50_seedFFSdiverse6/0_logos_aligned_hoo/T128381_2.00_RSTKVSNR_161.pdf]

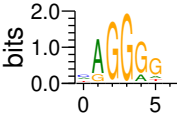

WebLogo 3.6.0

Supplement: SUPPLEMENTAL_Matl.zip [file T128387_2.00_REHRRDNQ_162.pdf › SUPPLEMENTAL_Matl/rCLAMPS/my_results/zf-C2H2_250_50_seedFFSdiverse6/0_logos_aligned_hoo/T128387_2.00_REHRRDNQ_162.pdf]

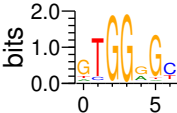

WebLogo 3.6.0

Supplement: SUPPLEMENTAL_Matl.zip [file T128389_2.00_RQHRRDLR_163.pdf › SUPPLEMENTAL_Matl/rCLAMPS/my_results/zf-C2H2_250_50_seedFFSdiverse6/0_logos_aligned_hoo/T128389_2.00_RQHRRDLR_163.pdf]

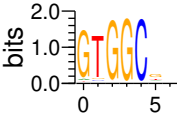

WebLogo 3.6.0

Supplement: SUPPLEMENTAL_Matl.zip [file T128395_2.00_RADRRDAR_164.pdf › SUPPLEMENTAL_Matl/rCLAMPS/my_results/zf-C2H2_250_50_seedFFSdiverse6/0_logos_aligned_hoo/T128395_2.00_RADRRDAR_164.pdf]

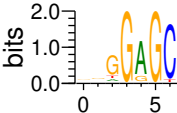

WebLogo 3.6.0

Supplement: SUPPLEMENTAL_Matl.zip [file T129400_2.00_RENRRDLR_165.pdf › SUPPLEMENTAL_Matl/rCLAMPS/my_results/zf-C2H2_250_50_seedFFSdiverse6/0_logos_aligned_hoo/T129400_2.00_RENRRDLR_165.pdf]

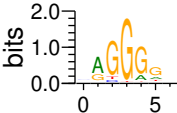

WebLogo 3.6.0

Supplement: SUPPLEMENTAL_Matl.zip [file T129406_2.00_REHRRDNQ_166.pdf › SUPPLEMENTAL_Matl/rCLAMPS/my_results/zf-C2H2_250_50_seedFFSdiverse6/0_logos_aligned_hoo/T129406_2.00_REHRRDNQ_166.pdf]

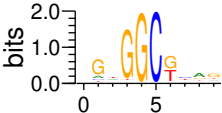

WebLogo 3.6.0

Supplement: SUPPLEMENTAL_Matl.zip [file T129407_2.00_RYNSRHDRRDAR_167.pdf › SUPPLEMENTAL_Matl/rCLAMPS/my_results/zf-C2H2_250_50_seedFFSdiverse6/0_logos_aligned_hoo/T129407_2.00_RYNSRHDRRDAR_167.pdf]

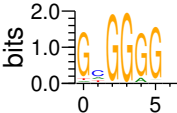

WebLogo 3.6.0

Supplement: SUPPLEMENTAL_Matl.zip [file T129409_2.00_REHRRDLR_168.pdf › SUPPLEMENTAL_Matl/rCLAMPS/my_results/zf-C2H2_250_50_seedFFSdiverse6/0_logos_aligned_hoo/T129409_2.00_REHRRDLR_168.pdf]

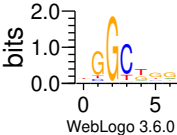

Supplement: SUPPLEMENTAL_Matl.zip [file T129410_2.00_RYNSRHDR_169.pdf › SUPPLEMENTAL_Matl/rCLAMPS/my_results/zf-C2H2_250_50_seedFFSdiverse6/0_logos_aligned_hoo/T129410_2.00_RYNSRHDR_169.pdf]

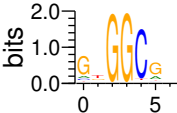

WebLogo 3.6.0

Supplement: SUPPLEMENTAL_Matl.zip [file T129445_2.00_RYDRRDAR_170.pdf › SUPPLEMENTAL_Matl/rCLAMPS/my_results/zf-C2H2_250_50_seedFFSdiverse6/0_logos_aligned_hoo/T129445_2.00_RYDRRDAR_170.pdf]

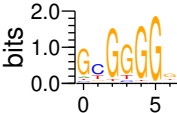

Supplement: SUPPLEMENTAL_Matl.zip [file T129448_2.00_REHRRDER_171.pdf › SUPPLEMENTAL_Matl/rCLAMPS/my_results/zf-C2H2_250_50_seedFFSdiverse6/0_logos_aligned_hoo/T129448_2.00_REHRRDER_171.pdf]

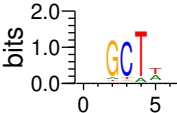

WebLogo 3.6.0

Supplement: SUPPLEMENTAL_Matl.zip [file T131556_2.00_HSSRSDTS_172.pdf › SUPPLEMENTAL_Matl/rCLAMPS/my_results/zf-C2H2_250_50_seedFFSdiverse6/0_logos_aligned_hoo/T131556_2.00_HSSRSDTS_172.pdf]

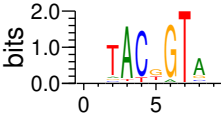

WebLogo 3.6.0

Supplement: SUPPLEMENTAL_Matl.zip [file T131561_2.00_SKGQFSNELGNK_173.pdf › SUPPLEMENTAL_Matl/rCLAMPS/my_results/zf-C2H2_250_50_seedFFSdiverse6/0_logos_aligned_hoo/T131561_2.00_SKGQFSNELGNK_173.pdf]

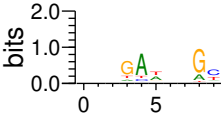

WebLogo 3.6.0

Supplement: SUPPLEMENTAL_Matl.zip [file T131562_2.00_RNTTQGNRRSNT_174.pdf › SUPPLEMENTAL_Matl/rCLAMPS/my_results/zf-C2H2_250_50_seedFFSdiverse6/0_logos_aligned_hoo/T131562_2.00_RNTTQGNRRSNT_174.pdf]

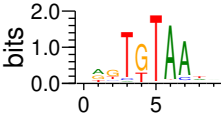

WebLogo 3.6.0

Supplement: SUPPLEMENTAL_Matl.zip [file T131568_2.00_SMEERSTNWNSC_175.pdf › SUPPLEMENTAL_Matl/rCLAMPS/my_results/zf-C2H2_250_50_seedFFSdiverse6/0_logos_aligned_hoo/T131568_2.00_SMEERSTNWNSC_175.pdf]

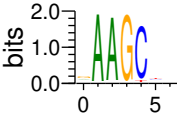

WebLogo 3.6.0

Supplement: SUPPLEMENTAL_Matl.zip [file T131585_2.00_HASRQETE_176.pdf › SUPPLEMENTAL_Matl/rCLAMPS/my_results/zf-C2H2_250_50_seedFFSdiverse6/0_logos_aligned_hoo/T131585_2.00_HASRQETE_176.pdf]

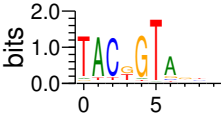

WebLogo 3.6.0

Supplement: SUPPLEMENTAL_Matl.zip [file T131587_2.00_NKGQYSNELGNK_177.pdf › SUPPLEMENTAL_Matl/rCLAMPS/my_results/zf-C2H2_250_50_seedFFSdiverse6/0_logos_aligned_hoo/T131587_2.00_NKGQYSNELGNK_177.pdf]

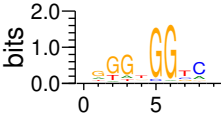

Supplement: SUPPLEMENTAL_Matl.zip [file T131592_2.00_QYEARENTNSDK_178.pdf › SUPPLEMENTAL_Matl/rCLAMPS/my_results/zf-C2H2_250_50_seedFFSdiverse6/0_logos_aligned_hoo/T131592_2.00_QYEARENTNSDK_178.pdf]

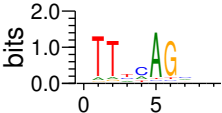

WebLogo 3.6.0

Supplement: SUPPLEMENTAL_Matl.zip [file T131601_2.00_EGSRQHALTNGL_179.pdf › SUPPLEMENTAL_Matl/rCLAMPS/my_results/zf-C2H2_250_50_seedFFSdiverse6/0_logos_aligned_hoo/T131601_2.00_EGSRQHALTNGL_179.pdf]

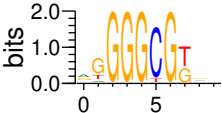

WebLogo 3.6.0

Supplement: SUPPLEMENTAL_Matl.zip [file T131606_2.00_KSHARDERRDHK_180.pdf › SUPPLEMENTAL_Matl/rCLAMPS/my_results/zf-C2H2_250_50_seedFFSdiverse6/0_logos_aligned_hoo/T131606_2.00_KSHARDERRDHK_180.pdf]

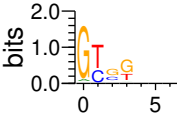

WebLogo 3.6.0

Supplement: SUPPLEMENTAL_Matl.zip [file T131607_2.00_SRRHSDSR_181.pdf › SUPPLEMENTAL_Matl/rCLAMPS/my_results/zf-C2H2_250_50_seedFFSdiverse6/0_logos_aligned_hoo/T131607_2.00_SRRHSDSR_181.pdf]

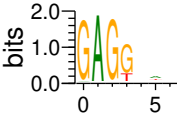

WebLogo 3.6.0

Supplement: SUPPLEMENTAL_Matl.zip [file T131614_2.00_NFLKRDNR_182.pdf › SUPPLEMENTAL_Matl/rCLAMPS/my_results/zf-C2H2_250_50_seedFFSdiverse6/0_logos_aligned_hoo/T131614_2.00_NFLKRDNR_182.pdf]

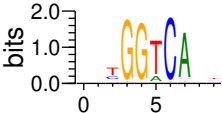

WebLogo 3.6.0

Supplement: SUPPLEMENTAL_Matl.zip [file T131625_2.00_NSNVQSKRVSTK_184.pdf › SUPPLEMENTAL_Matl/rCLAMPS/my_results/zf-C2H2_250_50_seedFFSdiverse6/0_logos_aligned_hoo/T131625_2.00_NSNVQSKRVSTK_184.pdf]

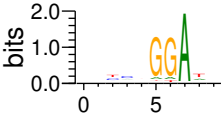

Supplement: SUPPLEMENTAL_Matl.zip [file T131635_2.00_QANRRDQEQNAA_185.pdf › SUPPLEMENTAL_Matl/rCLAMPS/my_results/zf-C2H2_250_50_seedFFSdiverse6/0_logos_aligned_hoo/T131635_2.00_QANRRDQEQNAA_185.pdf]

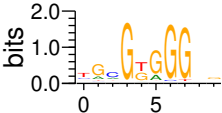

WebLogo 3.6.0

Supplement: SUPPLEMENTAL_Matl.zip [file T131643_2.00_RDIRRDHTRDVR_186.pdf › SUPPLEMENTAL_Matl/rCLAMPS/my_results/zf-C2H2_250_50_seedFFSdiverse6/0_logos_aligned_hoo/T131643_2.00_RDIRRDHTRDVR_186.pdf]

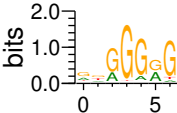

WebLogo 3.6.0

Supplement: SUPPLEMENTAL_Matl.zip [file T131650_2.00_RDHRRDHK_187.pdf › SUPPLEMENTAL_Matl/rCLAMPS/my_results/zf-C2H2_250_50_seedFFSdiverse6/0_logos_aligned_hoo/T131650_2.00_RDHRRDHK_187.pdf]

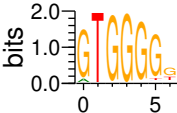

Supplement: SUPPLEMENTAL_Matl.zip [file T131789_2.00_REHRRDLR_188.pdf › SUPPLEMENTAL_Matl/rCLAMPS/my_results/zf-C2H2_250_50_seedFFSdiverse6/0_logos_aligned_hoo/T131789_2.00_REHRRDLR_188.pdf]

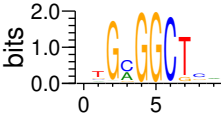

WebLogo 3.6.0

Supplement: SUPPLEMENTAL_Matl.zip [file T131790_2.00_TYLSRNERRDNR_189.pdf › SUPPLEMENTAL_Matl/rCLAMPS/my_results/zf-C2H2_250_50_seedFFSdiverse6/0_logos_aligned_hoo/T131790_2.00_TYLSRNERRDNR_189.pdf]

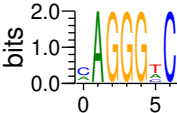

WebLogo 3.6.0

Supplement: SUPPLEMENTAL_Matl.zip [file T131822_2.00_TGHRRDNQ_190.pdf › SUPPLEMENTAL_Matl/rCLAMPS/my_results/zf-C2H2_250_50_seedFFSdiverse6/0_logos_aligned_hoo/T131822_2.00_TGHRRDNQ_190.pdf]

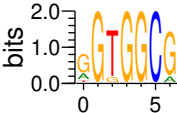

WebLogo 3.6.0

Supplement: SUPPLEMENTAL_Matl.zip [file T131824_2.00_RYDRRDAR_191.pdf › SUPPLEMENTAL_Matl/rCLAMPS/my_results/zf-C2H2_250_50_seedFFSdiverse6/0_logos_aligned_hoo/T131824_2.00_RYDRRDAR_191.pdf]

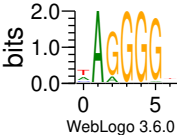

Supplement: SUPPLEMENTAL_Matl.zip [file T131828_2.00_SHHRRDHQ_192.pdf › SUPPLEMENTAL_Matl/rCLAMPS/my_results/zf-C2H2_250_50_seedFFSdiverse6/0_logos_aligned_hoo/T131828_2.00_SHHRRDHQ_192.pdf]

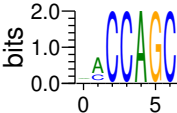

WebLogo 3.6.0

Supplement: SUPPLEMENTAL_Matl.zip [file T131829_2.00_RYNSRHDR_193.pdf › SUPPLEMENTAL_Matl/rCLAMPS/my_results/zf-C2H2_250_50_seedFFSdiverse6/0_logos_aligned_hoo/T131829_2.00_RYNSRHDR_193.pdf]

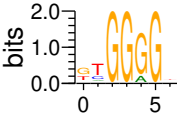

WebLogo 3.6.0

Supplement: SUPPLEMENTAL_Matl.zip [file T131830_2.00_REHRRDLR_194.pdf › SUPPLEMENTAL_Matl/rCLAMPS/my_results/zf-C2H2_250_50_seedFFSdiverse6/0_logos_aligned_hoo/T131830_2.00_REHRRDLR_194.pdf]

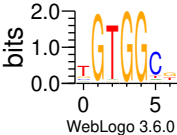

Supplement: SUPPLEMENTAL_Matl.zip [file T131831_2.00_RSDRRDAR_195.pdf › SUPPLEMENTAL_Matl/rCLAMPS/my_results/zf-C2H2_250_50_seedFFSdiverse6/0_logos_aligned_hoo/T131831_2.00_RSDRRDAR_195.pdf]

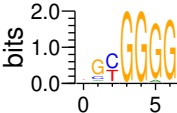

WebLogo 3.6.0

Supplement: SUPPLEMENTAL_Matl.zip [file T131833_2.00_REHRRDER_196.pdf › SUPPLEMENTAL_Matl/rCLAMPS/my_results/zf-C2H2_250_50_seedFFSdiverse6/0_logos_aligned_hoo/T131833_2.00_REHRRDER_196.pdf]

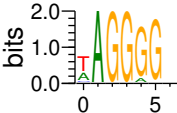

WebLogo 3.6.0

Supplement: SUPPLEMENTAL_Matl.zip [file T131834_2.00_REHRRDNQ_197.pdf › SUPPLEMENTAL_Matl/rCLAMPS/my_results/zf-C2H2_250_50_seedFFSdiverse6/0_logos_aligned_hoo/T131834_2.00_REHRRDNQ_197.pdf]

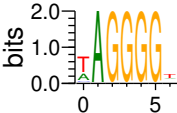

WebLogo 3.6.0

Supplement: SUPPLEMENTAL_Matl.zip [file T131835_2.00_SHHRRDHQ_198.pdf › SUPPLEMENTAL_Matl/rCLAMPS/my_results/zf-C2H2_250_50_seedFFSdiverse6/0_logos_aligned_hoo/T131835_2.00_SHHRRDHQ_198.pdf]

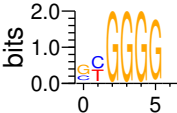

WebLogo 3.6.0

Supplement: SUPPLEMENTAL_Matl.zip [file T131836_2.00_REHRRDER_199.pdf › SUPPLEMENTAL_Matl/rCLAMPS/my_results/zf-C2H2_250_50_seedFFSdiverse6/0_logos_aligned_hoo/T131836_2.00_REHRRDER_199.pdf]

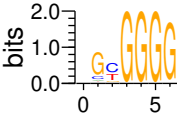

WebLogo 3.6.0

Supplement: SUPPLEMENTAL_Matl.zip [file T131837_2.00_REHRRDER_200.pdf › SUPPLEMENTAL_Matl/rCLAMPS/my_results/zf-C2H2_250_50_seedFFSdiverse6/0_logos_aligned_hoo/T131837_2.00_REHRRDER_200.pdf]

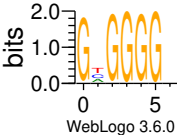

Supplement: SUPPLEMENTAL_Matl.zip [file T131840_2.00_REHRRDLR_201.pdf › SUPPLEMENTAL_Matl/rCLAMPS/my_results/zf-C2H2_250_50_seedFFSdiverse6/0_logos_aligned_hoo/T131840_2.00_REHRRDLR_201.pdf]

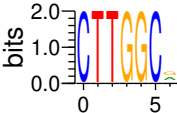

Supplement: SUPPLEMENTAL_Matl.zip [file T131841_2.00_KDHSRQDK_202.pdf › SUPPLEMENTAL_Matl/rCLAMPS/my_results/zf-C2H2_250_50_seedFFSdiverse6/0_logos_aligned_hoo/T131841_2.00_KDHSRQDK_202.pdf]

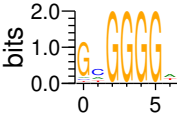

WebLogo 3.6.0

Supplement: SUPPLEMENTAL_Matl.zip [file T131844_2.00_REHRRDLR_203.pdf › SUPPLEMENTAL_Matl/rCLAMPS/my_results/zf-C2H2_250_50_seedFFSdiverse6/0_logos_aligned_hoo/T131844_2.00_REHRRDLR_203.pdf]

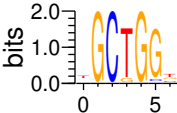

WebLogo 3.6.0

Supplement: SUPPLEMENTAL_Matl.zip [file T131846_2.00_RYNSRHDR_204.pdf › SUPPLEMENTAL_Matl/rCLAMPS/my_results/zf-C2H2_250_50_seedFFSdiverse6/0_logos_aligned_hoo/T131846_2.00_RYNSRHDR_204.pdf]

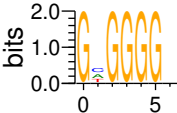

WebLogo 3.6.0

Supplement: SUPPLEMENTAL_Matl.zip [file T131849_2.00_REHRRDLR_205.pdf › SUPPLEMENTAL_Matl/rCLAMPS/my_results/zf-C2H2_250_50_seedFFSdiverse6/0_logos_aligned_hoo/T131849_2.00_REHRRDLR_205.pdf]

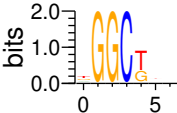

WebLogo 3.6.0

Supplement: SUPPLEMENTAL_Matl.zip [file T131853_2.00_RYNSRHDR_206.pdf › SUPPLEMENTAL_Matl/rCLAMPS/my_results/zf-C2H2_250_50_seedFFSdiverse6/0_logos_aligned_hoo/T131853_2.00_RYNSRHDR_206.pdf]

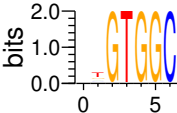

Supplement: SUPPLEMENTAL_Matl.zip [file T131855_2.00_RSDRRDAR_207.pdf › SUPPLEMENTAL_Matl/rCLAMPS/my_results/zf-C2H2_250_50_seedFFSdiverse6/0_logos_aligned_hoo/T131855_2.00_RSDRRDAR_207.pdf]
