# Supplementary figures and images for: Learning probabilistic protein–DNA recognition codes from DNA-binding specificities using structural mappings (part 18 of 25)
Source: HighWire-hosted journal article supplement (doi:10.1101/gr.276606.122), 2022-09-01

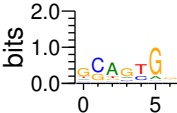

WebLogo 3.6.0

Supplement: SUPPLEMENTAL_Matl.zip [file T125863_2.00_RERYQSDR_150.pdf › SUPPLEMENTAL_Matl/rCLAMPS/my_results/zf-C2H2_250_50_seedFFSdiverse6/0_logos_predicted_hoo/T125863_2.00_RERYQSDR_150.pdf]

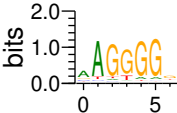

Supplement: SUPPLEMENTAL_Matl.zip [file T125870_2.00_REHRRDNQ_151.pdf › SUPPLEMENTAL_Matl/rCLAMPS/my_results/zf-C2H2_250_50_seedFFSdiverse6/0_logos_predicted_hoo/T125870_2.00_REHRRDNQ_151.pdf]

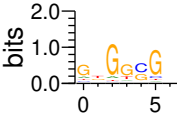

Supplement: SUPPLEMENTAL_Matl.zip [file T125880_2.00_RYDRRDAR_152.pdf › SUPPLEMENTAL_Matl/rCLAMPS/my_results/zf-C2H2_250_50_seedFFSdiverse6/0_logos_predicted_hoo/T125880_2.00_RYDRRDAR_152.pdf]

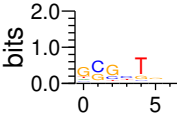

WebLogo 3.6.0

Supplement: SUPPLEMENTAL_Matl.zip [file T125883_2.00_RTASRHDR_153.pdf › SUPPLEMENTAL_Matl/rCLAMPS/my_results/zf-C2H2_250_50_seedFFSdiverse6/0_logos_predicted_hoo/T125883_2.00_RTASRHDR_153.pdf]

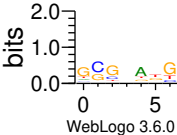

Supplement: SUPPLEMENTAL_Matl.zip [file T125893_2.00_RFNTRHDR_154.pdf › SUPPLEMENTAL_Matl/rCLAMPS/my_results/zf-C2H2_250_50_seedFFSdiverse6/0_logos_predicted_hoo/T125893_2.00_RFNTRHDR_154.pdf]

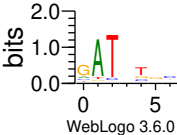

Supplement: SUPPLEMENTAL_Matl.zip [file T125909_2.00_RSSIVSNR_155.pdf › SUPPLEMENTAL_Matl/rCLAMPS/my_results/zf-C2H2_250_50_seedFFSdiverse6/0_logos_predicted_hoo/T125909_2.00_RSSIVSNR_155.pdf]

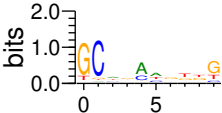

Supplement: SUPPLEMENTAL_Matl.zip [file T126264_2.00_RFARTGNRTTKR_156.pdf › SUPPLEMENTAL_Matl/rCLAMPS/my_results/zf-C2H2_250_50_seedFFSdiverse6/0_logos_predicted_hoo/T126264_2.00_RFARTGNRTTKR_156.pdf]

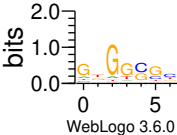

Supplement: SUPPLEMENTAL_Matl.zip [file T128342_2.00_RHDRRDAR_157.pdf › SUPPLEMENTAL_Matl/rCLAMPS/my_results/zf-C2H2_250_50_seedFFSdiverse6/0_logos_predicted_hoo/T128342_2.00_RHDRRDAR_157.pdf]

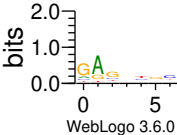

Supplement: SUPPLEMENTAL_Matl.zip [file T128344_2.00_RSTTASNR_158.pdf › SUPPLEMENTAL_Matl/rCLAMPS/my_results/zf-C2H2_250_50_seedFFSdiverse6/0_logos_predicted_hoo/T128344_2.00_RSTTASNR_158.pdf]

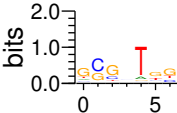

WebLogo 3.6.0

Supplement: SUPPLEMENTAL_Matl.zip [file T128346_2.00_RFSTRHDR_159.pdf › SUPPLEMENTAL_Matl/rCLAMPS/my_results/zf-C2H2_250_50_seedFFSdiverse6/0_logos_predicted_hoo/T128346_2.00_RFSTRHDR_159.pdf]



Supplement: SUPPLEMENTAL_Matl.zip [file T128357_2.00_RSSIVSNR_160.pdf › SUPPLEMENTAL_Matl/rCLAMPS/my_results/zf-C2H2_250_50_seedFFSdiverse6/0_logos_predicted_hoo/T128357_2.00_RSSIVSNR_160.pdf]

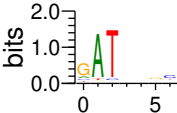

Supplement: SUPPLEMENTAL_Matl.zip [file T128381_2.00_RSTKVSNR_161.pdf › SUPPLEMENTAL_Matl/rCLAMPS/my_results/zf-C2H2_250_50_seedFFSdiverse6/0_logos_predicted_hoo/T128381_2.00_RSTKVSNR_161.pdf]



WebLogo 3.6.0

Supplement: SUPPLEMENTAL_Matl.zip [file T128387_2.00_REHRRDNQ_162.pdf › SUPPLEMENTAL_Matl/rCLAMPS/my_results/zf-C2H2_250_50_seedFFSdiverse6/0_logos_predicted_hoo/T128387_2.00_REHRRDNQ_162.pdf]

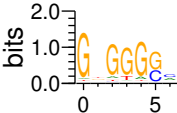

WebLogo 3.6.0

Supplement: SUPPLEMENTAL_Matl.zip [file T128389_2.00_RQHRRDLR_163.pdf › SUPPLEMENTAL_Matl/rCLAMPS/my_results/zf-C2H2_250_50_seedFFSdiverse6/0_logos_predicted_hoo/T128389_2.00_RQHRRDLR_163.pdf]

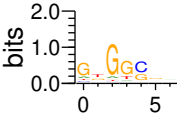

WebLogo 3.6.0

Supplement: SUPPLEMENTAL_Matl.zip [file T128395_2.00_RADRRDAR_164.pdf › SUPPLEMENTAL_Matl/rCLAMPS/my_results/zf-C2H2_250_50_seedFFSdiverse6/0_logos_predicted_hoo/T128395_2.00_RADRRDAR_164.pdf]

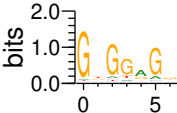

WebLogo 3.6.0

Supplement: SUPPLEMENTAL_Matl.zip [file T129400_2.00_RENRRDLR_165.pdf › SUPPLEMENTAL_Matl/rCLAMPS/my_results/zf-C2H2_250_50_seedFFSdiverse6/0_logos_predicted_hoo/T129400_2.00_RENRRDLR_165.pdf]



Supplement: SUPPLEMENTAL_Matl.zip [file T129406_2.00_REHRRDNQ_166.pdf › SUPPLEMENTAL_Matl/rCLAMPS/my_results/zf-C2H2_250_50_seedFFSdiverse6/0_logos_predicted_hoo/T129406_2.00_REHRRDNQ_166.pdf]

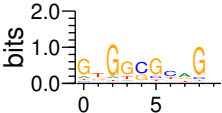

Supplement: SUPPLEMENTAL_Matl.zip [file T129407_2.00_RYNSRHDRRDAR_167.pdf › SUPPLEMENTAL_Matl/rCLAMPS/my_results/zf-C2H2_250_50_seedFFSdiverse6/0_logos_predicted_hoo/T129407_2.00_RYNSRHDRRDAR_167.pdf]

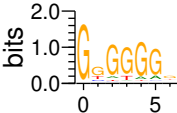

Supplement: SUPPLEMENTAL_Matl.zip [file T129409_2.00_REHRRDLR_168.pdf › SUPPLEMENTAL_Matl/rCLAMPS/my_results/zf-C2H2_250_50_seedFFSdiverse6/0_logos_predicted_hoo/T129409_2.00_REHRRDLR_168.pdf]

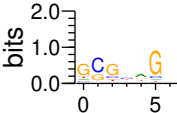

WebLogo 3.6.0

Supplement: SUPPLEMENTAL_Matl.zip [file T129410_2.00_RYNSRHDR_169.pdf › SUPPLEMENTAL_Matl/rCLAMPS/my_results/zf-C2H2_250_50_seedFFSdiverse6/0_logos_predicted_hoo/T129410_2.00_RYNSRHDR_169.pdf]



Supplement: SUPPLEMENTAL_Matl.zip [file T129445_2.00_RYDRRDAR_170.pdf › SUPPLEMENTAL_Matl/rCLAMPS/my_results/zf-C2H2_250_50_seedFFSdiverse6/0_logos_predicted_hoo/T129445_2.00_RYDRRDAR_170.pdf]

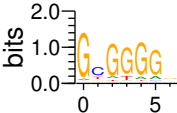

WebLogo 3.6.0

Supplement: SUPPLEMENTAL_Matl.zip [file T129448_2.00_REHRRDER_171.pdf › SUPPLEMENTAL_Matl/rCLAMPS/my_results/zf-C2H2_250_50_seedFFSdiverse6/0_logos_predicted_hoo/T129448_2.00_REHRRDER_171.pdf]

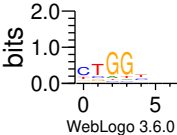

Supplement: SUPPLEMENTAL_Matl.zip [file T131556_2.00_HSSRSDTS_172.pdf › SUPPLEMENTAL_Matl/rCLAMPS/my_results/zf-C2H2_250_50_seedFFSdiverse6/0_logos_predicted_hoo/T131556_2.00_HSSRSDTS_172.pdf]

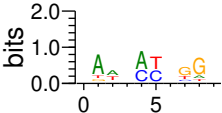

WebLogo 3.6.0

Supplement: SUPPLEMENTAL_Matl.zip [file T131561_2.00_SKGQFSNELGNK_173.pdf › SUPPLEMENTAL_Matl/rCLAMPS/my_results/zf-C2H2_250_50_seedFFSdiverse6/0_logos_predicted_hoo/T131561_2.00_SKGQFSNELGNK_173.pdf]

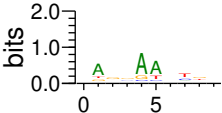

WebLogo 3.6.0

Supplement: SUPPLEMENTAL_Matl.zip [file T131562_2.00_RNTTQGNRRSNT_174.pdf › SUPPLEMENTAL_Matl/rCLAMPS/my_results/zf-C2H2_250_50_seedFFSdiverse6/0_logos_predicted_hoo/T131562_2.00_RNTTQGNRRSNT_174.pdf]

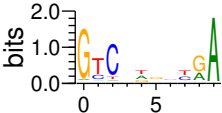

WebLogo 3.6.0

Supplement: SUPPLEMENTAL_Matl.zip [file T131568_2.00_SMEERSTNWNSC_175.pdf › SUPPLEMENTAL_Matl/rCLAMPS/my_results/zf-C2H2_250_50_seedFFSdiverse6/0_logos_predicted_hoo/T131568_2.00_SMEERSTNWNSC_175.pdf]

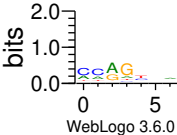

Supplement: SUPPLEMENTAL_Matl.zip [file T131585_2.00_HASRQETE_176.pdf › SUPPLEMENTAL_Matl/rCLAMPS/my_results/zf-C2H2_250_50_seedFFSdiverse6/0_logos_predicted_hoo/T131585_2.00_HASRQETE_176.pdf]

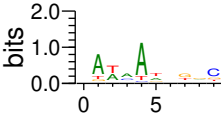

Supplement: SUPPLEMENTAL_Matl.zip [file T131587_2.00_NKGQYSNELGNK_177.pdf › SUPPLEMENTAL_Matl/rCLAMPS/my_results/zf-C2H2_250_50_seedFFSdiverse6/0_logos_predicted_hoo/T131587_2.00_NKGQYSNELGNK_177.pdf]

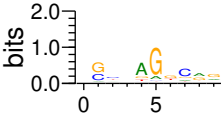

WebLogo 3.6.0

Supplement: SUPPLEMENTAL_Matl.zip [file T131592_2.00_QYEARENTNSDK_178.pdf › SUPPLEMENTAL_Matl/rCLAMPS/my_results/zf-C2H2_250_50_seedFFSdiverse6/0_logos_predicted_hoo/T131592_2.00_QYEARENTNSDK_178.pdf]

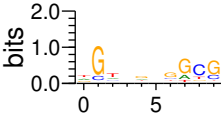

Supplement: SUPPLEMENTAL_Matl.zip [file T131601_2.00_EGSRQHALTNGL_179.pdf › SUPPLEMENTAL_Matl/rCLAMPS/my_results/zf-C2H2_250_50_seedFFSdiverse6/0_logos_predicted_hoo/T131601_2.00_EGSRQHALTNGL_179.pdf]

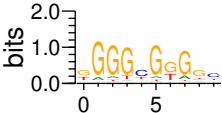

WebLogo 3.6.0

Supplement: SUPPLEMENTAL_Matl.zip [file T131606_2.00_KSHARDERRDHK_180.pdf › SUPPLEMENTAL_Matl/rCLAMPS/my_results/zf-C2H2_250_50_seedFFSdiverse6/0_logos_predicted_hoo/T131606_2.00_KSHARDERRDHK_180.pdf]

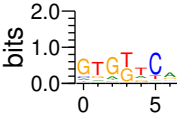

WebLogo 3.6.0

Supplement: SUPPLEMENTAL_Matl.zip [file T131607_2.00_SRRHSDSR_181.pdf › SUPPLEMENTAL_Matl/rCLAMPS/my_results/zf-C2H2_250_50_seedFFSdiverse6/0_logos_predicted_hoo/T131607_2.00_SRRHSDSR_181.pdf]

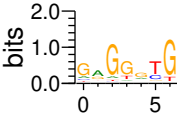

WebLogo 3.6.0

Supplement: SUPPLEMENTAL_Matl.zip [file T131614_2.00_NFLKRDNR_182.pdf › SUPPLEMENTAL_Matl/rCLAMPS/my_results/zf-C2H2_250_50_seedFFSdiverse6/0_logos_predicted_hoo/T131614_2.00_NFLKRDNR_182.pdf]

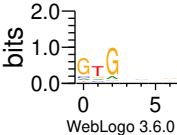

Supplement: SUPPLEMENTAL_Matl.zip [file T131622_2.00_QHGQRESR_183.pdf › SUPPLEMENTAL_Matl/rCLAMPS/my_results/zf-C2H2_250_50_seedFFSdiverse6/0_logos_predicted_hoo/T131622_2.00_QHGQRESR_183.pdf]

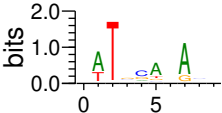

WebLogo 3.6.0

Supplement: SUPPLEMENTAL_Matl.zip [file T131625_2.00_NSNVQSKRVSTK_184.pdf › SUPPLEMENTAL_Matl/rCLAMPS/my_results/zf-C2H2_250_50_seedFFSdiverse6/0_logos_predicted_hoo/T131625_2.00_NSNVQSKRVSTK_184.pdf]

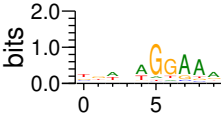

WebLogo 3.6.0

Supplement: SUPPLEMENTAL_Matl.zip [file T131635_2.00_QANRRDQEQNAA_185.pdf › SUPPLEMENTAL_Matl/rCLAMPS/my_results/zf-C2H2_250_50_seedFFSdiverse6/0_logos_predicted_hoo/T131635_2.00_QANRRDQEQNAA_185.pdf]

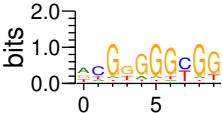

WebLogo 3.6.0

Supplement: SUPPLEMENTAL_Matl.zip [file T131643_2.00_RDIRRDHTRDVR_186.pdf › SUPPLEMENTAL_Matl/rCLAMPS/my_results/zf-C2H2_250_50_seedFFSdiverse6/0_logos_predicted_hoo/T131643_2.00_RDIRRDHTRDVR_186.pdf]

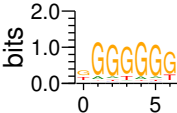

WebLogo 3.6.0

Supplement: SUPPLEMENTAL_Matl.zip [file T131650_2.00_RDHRRDHK_187.pdf › SUPPLEMENTAL_Matl/rCLAMPS/my_results/zf-C2H2_250_50_seedFFSdiverse6/0_logos_predicted_hoo/T131650_2.00_RDHRRDHK_187.pdf]



Supplement: SUPPLEMENTAL_Matl.zip [file T131789_2.00_REHRRDLR_188.pdf › SUPPLEMENTAL_Matl/rCLAMPS/my_results/zf-C2H2_250_50_seedFFSdiverse6/0_logos_predicted_hoo/T131789_2.00_REHRRDLR_188.pdf]

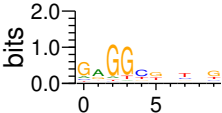

WebLogo 3.6.0

Supplement: SUPPLEMENTAL_Matl.zip [file T131790_2.00_TYLSRNERRDNR_189.pdf › SUPPLEMENTAL_Matl/rCLAMPS/my_results/zf-C2H2_250_50_seedFFSdiverse6/0_logos_predicted_hoo/T131790_2.00_TYLSRNERRDNR_189.pdf]

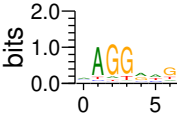

WebLogo 3.6.0

Supplement: SUPPLEMENTAL_Matl.zip [file T131822_2.00_TGHRRDNQ_190.pdf › SUPPLEMENTAL_Matl/rCLAMPS/my_results/zf-C2H2_250_50_seedFFSdiverse6/0_logos_predicted_hoo/T131822_2.00_TGHRRDNQ_190.pdf]



Supplement: SUPPLEMENTAL_Matl.zip [file T131824_2.00_RYDRRDAR_191.pdf › SUPPLEMENTAL_Matl/rCLAMPS/my_results/zf-C2H2_250_50_seedFFSdiverse6/0_logos_predicted_hoo/T131824_2.00_RYDRRDAR_191.pdf]

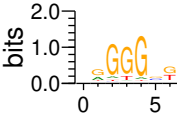

Supplement: SUPPLEMENTAL_Matl.zip [file T131828_2.00_SHHRRDHQ_192.pdf › SUPPLEMENTAL_Matl/rCLAMPS/my_results/zf-C2H2_250_50_seedFFSdiverse6/0_logos_predicted_hoo/T131828_2.00_SHHRRDHQ_192.pdf]



WebLogo 3.6.0

Supplement: SUPPLEMENTAL_Matl.zip [file T131829_2.00_RYNSRHDR_193.pdf › SUPPLEMENTAL_Matl/rCLAMPS/my_results/zf-C2H2_250_50_seedFFSdiverse6/0_logos_predicted_hoo/T131829_2.00_RYNSRHDR_193.pdf]



Supplement: SUPPLEMENTAL_Matl.zip [file T131830_2.00_REHRRDLR_194.pdf › SUPPLEMENTAL_Matl/rCLAMPS/my_results/zf-C2H2_250_50_seedFFSdiverse6/0_logos_predicted_hoo/T131830_2.00_REHRRDLR_194.pdf]

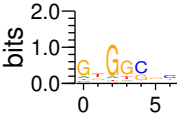

WebLogo 3.6.0

Supplement: SUPPLEMENTAL_Matl.zip [file T131831_2.00_RSDRRDAR_195.pdf › SUPPLEMENTAL_Matl/rCLAMPS/my_results/zf-C2H2_250_50_seedFFSdiverse6/0_logos_predicted_hoo/T131831_2.00_RSDRRDAR_195.pdf]



WebLogo 3.6.0

Supplement: SUPPLEMENTAL_Matl.zip [file T131833_2.00_REHRRDER_196.pdf › SUPPLEMENTAL_Matl/rCLAMPS/my_results/zf-C2H2_250_50_seedFFSdiverse6/0_logos_predicted_hoo/T131833_2.00_REHRRDER_196.pdf]



WebLogo 3.6.0

Supplement: SUPPLEMENTAL_Matl.zip [file T131834_2.00_REHRRDNQ_197.pdf › SUPPLEMENTAL_Matl/rCLAMPS/my_results/zf-C2H2_250_50_seedFFSdiverse6/0_logos_predicted_hoo/T131834_2.00_REHRRDNQ_197.pdf]



Supplement: SUPPLEMENTAL_Matl.zip [file T131835_2.00_SHHRRDHQ_198.pdf › SUPPLEMENTAL_Matl/rCLAMPS/my_results/zf-C2H2_250_50_seedFFSdiverse6/0_logos_predicted_hoo/T131835_2.00_SHHRRDHQ_198.pdf]



Supplement: SUPPLEMENTAL_Matl.zip [file T131836_2.00_REHRRDER_199.pdf › SUPPLEMENTAL_Matl/rCLAMPS/my_results/zf-C2H2_250_50_seedFFSdiverse6/0_logos_predicted_hoo/T131836_2.00_REHRRDER_199.pdf]



WebLogo 3.6.0

Supplement: SUPPLEMENTAL_Matl.zip [file T131837_2.00_REHRRDER_200.pdf › SUPPLEMENTAL_Matl/rCLAMPS/my_results/zf-C2H2_250_50_seedFFSdiverse6/0_logos_predicted_hoo/T131837_2.00_REHRRDER_200.pdf]



Supplement: SUPPLEMENTAL_Matl.zip [file T131840_2.00_REHRRDLR_201.pdf › SUPPLEMENTAL_Matl/rCLAMPS/my_results/zf-C2H2_250_50_seedFFSdiverse6/0_logos_predicted_hoo/T131840_2.00_REHRRDLR_201.pdf]

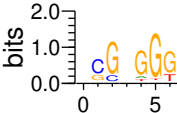

WebLogo 3.6.0

Supplement: SUPPLEMENTAL_Matl.zip [file T131841_2.00_KDHSRQDK_202.pdf › SUPPLEMENTAL_Matl/rCLAMPS/my_results/zf-C2H2_250_50_seedFFSdiverse6/0_logos_predicted_hoo/T131841_2.00_KDHSRQDK_202.pdf]



Supplement: SUPPLEMENTAL_Matl.zip [file T131844_2.00_REHRRDLR_203.pdf › SUPPLEMENTAL_Matl/rCLAMPS/my_results/zf-C2H2_250_50_seedFFSdiverse6/0_logos_predicted_hoo/T131844_2.00_REHRRDLR_203.pdf]



WebLogo 3.6.0

Supplement: SUPPLEMENTAL_Matl.zip [file T131846_2.00_RYNSRHDR_204.pdf › SUPPLEMENTAL_Matl/rCLAMPS/my_results/zf-C2H2_250_50_seedFFSdiverse6/0_logos_predicted_hoo/T131846_2.00_RYNSRHDR_204.pdf]



Supplement: SUPPLEMENTAL_Matl.zip [file T131849_2.00_REHRRDLR_205.pdf › SUPPLEMENTAL_Matl/rCLAMPS/my_results/zf-C2H2_250_50_seedFFSdiverse6/0_logos_predicted_hoo/T131849_2.00_REHRRDLR_205.pdf]



WebLogo 3.6.0

Supplement: SUPPLEMENTAL_Matl.zip [file T131853_2.00_RYNSRHDR_206.pdf › SUPPLEMENTAL_Matl/rCLAMPS/my_results/zf-C2H2_250_50_seedFFSdiverse6/0_logos_predicted_hoo/T131853_2.00_RYNSRHDR_206.pdf]

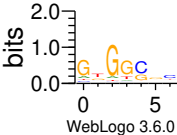

Supplement: SUPPLEMENTAL_Matl.zip [file T131855_2.00_RSDRRDAR_207.pdf › SUPPLEMENTAL_Matl/rCLAMPS/my_results/zf-C2H2_250_50_seedFFSdiverse6/0_logos_predicted_hoo/T131855_2.00_RSDRRDAR_207.pdf]

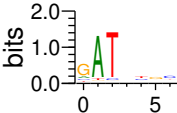

WebLogo 3.6.0

Supplement: SUPPLEMENTAL_Matl.zip [file T131857_2.00_RSTTVSNR_208.pdf › SUPPLEMENTAL_Matl/rCLAMPS/my_results/zf-C2H2_250_50_seedFFSdiverse6/0_logos_predicted_hoo/T131857_2.00_RSTTVSNR_208.pdf]

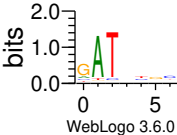

Supplement: SUPPLEMENTAL_Matl.zip [file T131858_2.00_RSTTVSNR_209.pdf › SUPPLEMENTAL_Matl/rCLAMPS/my_results/zf-C2H2_250_50_seedFFSdiverse6/0_logos_predicted_hoo/T131858_2.00_RSTTVSNR_209.pdf]



Supplement: SUPPLEMENTAL_Matl.zip [file T131859_2.00_REHRRDLR_210.pdf › SUPPLEMENTAL_Matl/rCLAMPS/my_results/zf-C2H2_250_50_seedFFSdiverse6/0_logos_predicted_hoo/T131859_2.00_REHRRDLR_210.pdf]

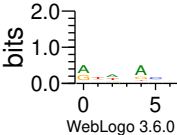

Supplement: SUPPLEMENTAL_Matl.zip [file T137733_2.00_DSNALSYK_211.pdf › SUPPLEMENTAL_Matl/rCLAMPS/my_results/zf-C2H2_250_50_seedFFSdiverse6/0_logos_predicted_hoo/T137733_2.00_DSNALSYK_211.pdf]

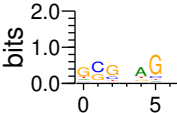

WebLogo 3.6.0

Supplement: SUPPLEMENTAL_Matl.zip [file T137734_2.00_RYNTRHDR_212.pdf › SUPPLEMENTAL_Matl/rCLAMPS/my_results/zf-C2H2_250_50_seedFFSdiverse6/0_logos_predicted_hoo/T137734_2.00_RYNTRHDR_212.pdf]



Supplement: SUPPLEMENTAL_Matl.zip [file T144838_2.00_REHRRDNQ_213.pdf › SUPPLEMENTAL_Matl/rCLAMPS/my_results/zf-C2H2_250_50_seedFFSdiverse6/0_logos_predicted_hoo/T144838_2.00_REHRRDNQ_213.pdf]

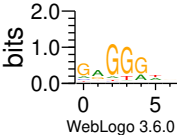

Supplement: SUPPLEMENTAL_Matl.zip [file T144839_2.00_TTHRRDNR_214.pdf › SUPPLEMENTAL_Matl/rCLAMPS/my_results/zf-C2H2_250_50_seedFFSdiverse6/0_logos_predicted_hoo/T144839_2.00_TTHRRDNR_214.pdf]



Supplement: SUPPLEMENTAL_Matl.zip [file T144840_2.00_REHRRDLR_215.pdf › SUPPLEMENTAL_Matl/rCLAMPS/my_results/zf-C2H2_250_50_seedFFSdiverse6/0_logos_predicted_hoo/T144840_2.00_REHRRDLR_215.pdf]



Supplement: SUPPLEMENTAL_Matl.zip [file T144842_2.00_RYDRRDAR_216.pdf › SUPPLEMENTAL_Matl/rCLAMPS/my_results/zf-C2H2_250_50_seedFFSdiverse6/0_logos_predicted_hoo/T144842_2.00_RYDRRDAR_216.pdf]

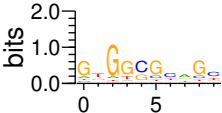

WebLogo 3.6.0

Supplement: SUPPLEMENTAL_Matl.zip [file T144845_2.00_RHNSRHDRRDAR_217.pdf › SUPPLEMENTAL_Matl/rCLAMPS/my_results/zf-C2H2_250_50_seedFFSdiverse6/0_logos_predicted_hoo/T144845_2.00_RHNSRHDRRDAR_217.pdf]



WebLogo 3.6.0

Supplement: SUPPLEMENTAL_Matl.zip [file T144846_2.00_REHRRDNQ_218.pdf › SUPPLEMENTAL_Matl/rCLAMPS/my_results/zf-C2H2_250_50_seedFFSdiverse6/0_logos_predicted_hoo/T144846_2.00_REHRRDNQ_218.pdf]



WebLogo 3.6.0

Supplement: SUPPLEMENTAL_Matl.zip [file T144848_2.00_TGHRRDNQ_219.pdf › SUPPLEMENTAL_Matl/rCLAMPS/my_results/zf-C2H2_250_50_seedFFSdiverse6/0_logos_predicted_hoo/T144848_2.00_TGHRRDNQ_219.pdf]

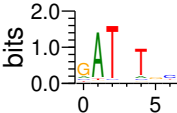

WebLogo 3.6.0

Supplement: SUPPLEMENTAL_Matl.zip [file T144849_2.00_RSSTVSNR_220.pdf › SUPPLEMENTAL_Matl/rCLAMPS/my_results/zf-C2H2_250_50_seedFFSdiverse6/0_logos_predicted_hoo/T144849_2.00_RSSTVSNR_220.pdf]



Supplement: SUPPLEMENTAL_Matl.zip [file T144850_2.00_RSSIVSNR_221.pdf › SUPPLEMENTAL_Matl/rCLAMPS/my_results/zf-C2H2_250_50_seedFFSdiverse6/0_logos_predicted_hoo/T144850_2.00_RSSIVSNR_221.pdf]

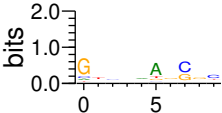

WebLogo 3.6.0

Supplement: SUPPLEMENTAL_Matl.zip [file T144852_2.00_RSDRQSAVDSSR_222.pdf › SUPPLEMENTAL_Matl/rCLAMPS/my_results/zf-C2H2_250_50_seedFFSdiverse6/0_logos_predicted_hoo/T144852_2.00_RSDRQSAVDSSR_222.pdf]



Supplement: SUPPLEMENTAL_Matl.zip [file T144853_2.00_REHRRDNQ_223.pdf › SUPPLEMENTAL_Matl/rCLAMPS/my_results/zf-C2H2_250_50_seedFFSdiverse6/0_logos_predicted_hoo/T144853_2.00_REHRRDNQ_223.pdf]



Supplement: SUPPLEMENTAL_Matl.zip [file T144861_2.00_REHRRDLR_224.pdf › SUPPLEMENTAL_Matl/rCLAMPS/my_results/zf-C2H2_250_50_seedFFSdiverse6/0_logos_predicted_hoo/T144861_2.00_REHRRDLR_224.pdf]



Supplement: SUPPLEMENTAL_Matl.zip [file T144866_2.00_REHRRDNQ_225.pdf › SUPPLEMENTAL_Matl/rCLAMPS/my_results/zf-C2H2_250_50_seedFFSdiverse6/0_logos_predicted_hoo/T144866_2.00_REHRRDNQ_225.pdf]



Supplement: SUPPLEMENTAL_Matl.zip [file T144867_2.00_REHRRDLR_226.pdf › SUPPLEMENTAL_Matl/rCLAMPS/my_results/zf-C2H2_250_50_seedFFSdiverse6/0_logos_predicted_hoo/T144867_2.00_REHRRDLR_226.pdf]

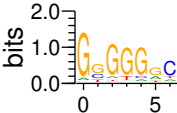

WebLogo 3.6.0

Supplement: SUPPLEMENTAL_Matl.zip [file T144868_2.00_HKHRRDIR_227.pdf › SUPPLEMENTAL_Matl/rCLAMPS/my_results/zf-C2H2_250_50_seedFFSdiverse6/0_logos_predicted_hoo/T144868_2.00_HKHRRDIR_227.pdf]

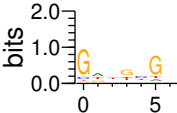

WebLogo 3.6.0

Supplement: SUPPLEMENTAL_Matl.zip [file T144869_2.00_SKERAAQR_228.pdf › SUPPLEMENTAL_Matl/rCLAMPS/my_results/zf-C2H2_250_50_seedFFSdiverse6/0_logos_predicted_hoo/T144869_2.00_SKERAAQR_228.pdf]



Supplement: SUPPLEMENTAL_Matl.zip [file T144873_2.00_REHRRDLR_229.pdf › SUPPLEMENTAL_Matl/rCLAMPS/my_results/zf-C2H2_250_50_seedFFSdiverse6/0_logos_predicted_hoo/T144873_2.00_REHRRDLR_229.pdf]

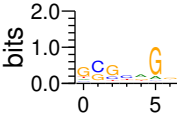

WebLogo 3.6.0

Supplement: SUPPLEMENTAL_Matl.zip [file T144874_2.00_RENSRHDR_230.pdf › SUPPLEMENTAL_Matl/rCLAMPS/my_results/zf-C2H2_250_50_seedFFSdiverse6/0_logos_predicted_hoo/T144874_2.00_RENSRHDR_230.pdf]



WebLogo 3.6.0

Supplement: SUPPLEMENTAL_Matl.zip [file T144877_2.00_RYNSRHDR_231.pdf › SUPPLEMENTAL_Matl/rCLAMPS/my_results/zf-C2H2_250_50_seedFFSdiverse6/0_logos_predicted_hoo/T144877_2.00_RYNSRHDR_231.pdf]



WebLogo 3.6.0

Supplement: SUPPLEMENTAL_Matl.zip [file T144879_2.00_REHRRDER_232.pdf › SUPPLEMENTAL_Matl/rCLAMPS/my_results/zf-C2H2_250_50_seedFFSdiverse6/0_logos_predicted_hoo/T144879_2.00_REHRRDER_232.pdf]



Supplement: SUPPLEMENTAL_Matl.zip [file T144882_2.00_RHDRRDAR_233.pdf › SUPPLEMENTAL_Matl/rCLAMPS/my_results/zf-C2H2_250_50_seedFFSdiverse6/0_logos_predicted_hoo/T144882_2.00_RHDRRDAR_233.pdf]



WebLogo 3.6.0

Supplement: SUPPLEMENTAL_Matl.zip [file T144969_2.00_REHRRDNQ_234.pdf › SUPPLEMENTAL_Matl/rCLAMPS/my_results/zf-C2H2_250_50_seedFFSdiverse6/0_logos_predicted_hoo/T144969_2.00_REHRRDNQ_234.pdf]



# WebLogo 3.6.0

Supplement: SUPPLEMENTAL_Matl.zip [file T144982_2.00_REHRRDNQ_235.pdf › SUPPLEMENTAL_Matl/rCLAMPS/my_results/zf-C2H2_250_50_seedFFSdiverse6/0_logos_predicted_hoo/T144982_2.00_REHRRDNQ_235.pdf]

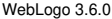

Supplement: SUPPLEMENTAL_Matl.zip [file bowl_KYNIRDHDQRTV_236.pdf › SUPPLEMENTAL_Matl/rCLAMPS/my_results/zf-C2H2_250_50_seedFFSdiverse6/0_logos_predicted_hoo/bowl_KYNIRDHDQRTV_236.pdf]

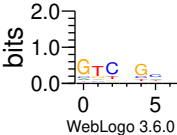

Supplement: SUPPLEMENTAL_Matl.zip [file disco_DGAISRSR_237.pdf › SUPPLEMENTAL_Matl/rCLAMPS/my_results/zf-C2H2_250_50_seedFFSdiverse6/0_logos_predicted_hoo/disco_DGAISRSR_237.pdf]

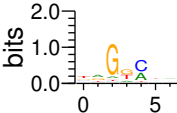

Supplement: SUPPLEMENTAL_Matl.zip [file fru_ISVHRDNA_238.pdf › SUPPLEMENTAL_Matl/rCLAMPS/my_results/zf-C2H2_250_50_seedFFSdiverse6/0_logos_predicted_hoo/fru_ISVHRDNA_238.pdf]

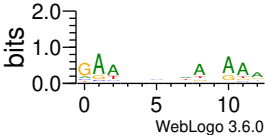

Supplement: SUPPLEMENTAL_Matl.zip [file gl_QANAQSSTDSTKQGNR_239.pdf › SUPPLEMENTAL_Matl/rCLAMPS/my_results/zf-C2H2_250_50_seedFFSdiverse6/0_logos_predicted_hoo/gl_QANAQSSTDSTKQGNR_239.pdf]

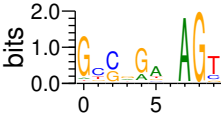

Supplement: SUPPLEMENTAL_Matl.zip [file ken_MWNTQAHKSQER_240.pdf › SUPPLEMENTAL_Matl/rCLAMPS/my_results/zf-C2H2_250_50_seedFFSdiverse6/0_logos_predicted_hoo/ken_MWNTQAHKSQER_240.pdf]

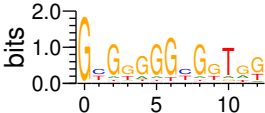

Supplement: SUPPLEMENTAL_Matl.zip [file klu_LDRKRDMRRDHTRDMR_241.pdf › SUPPLEMENTAL_Matl/rCLAMPS/my_results/zf-C2H2_250_50_seedFFSdiverse6/0_logos_predicted_hoo/klu_LDRKRDMRRDHTRDMR_241.pdf]

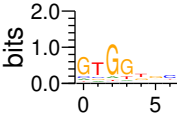

WebLogo 3.6.0

Supplement: SUPPLEMENTAL_Matl.zip [file lola-PA_RSARRDSR_243.pdf › SUPPLEMENTAL_Matl/rCLAMPS/my_results/zf-C2H2_250_50_seedFFSdiverse6/0_logos_predicted_hoo/lola-PA_RSARRDSR_243.pdf]

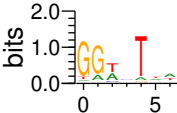

WebLogo 3.6.0

Supplement: SUPPLEMENTAL_Matl.zip [file lola-PC_LSSNQMHR_244.pdf › SUPPLEMENTAL_Matl/rCLAMPS/my_results/zf-C2H2_250_50_seedFFSdiverse6/0_logos_predicted_hoo/lola-PC_LSSNQMHR_244.pdf]

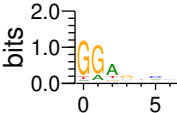

WebLogo 3.6.0

Supplement: SUPPLEMENTAL_Matl.zip [file lola-PF_DSSRQSHR_245.pdf › SUPPLEMENTAL_Matl/rCLAMPS/my_results/zf-C2H2_250_50_seedFFSdiverse6/0_logos_predicted_hoo/lola-PF_DSSRQSHR_245.pdf]



WebLogo 3.6.0

Supplement: SUPPLEMENTAL_Matl.zip [file lola-PL_RSARRDSR_246.pdf › SUPPLEMENTAL_Matl/rCLAMPS/my_results/zf-C2H2_250_50_seedFFSdiverse6/0_logos_predicted_hoo/lola-PL_RSARRDSR_246.pdf]

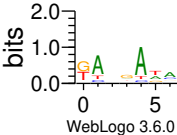

Supplement: SUPPLEMENTAL_Matl.zip [file lola-PU_YKNRYHSM_247.pdf › SUPPLEMENTAL_Matl/rCLAMPS/my_results/zf-C2H2_250_50_seedFFSdiverse6/0_logos_predicted_hoo/lola-PU_YKNRYHSM_247.pdf]

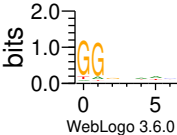

Supplement: SUPPLEMENTAL_Matl.zip [file lola-PY_TSRLRSHR_248.pdf › SUPPLEMENTAL_Matl/rCLAMPS/my_results/zf-C2H2_250_50_seedFFSdiverse6/0_logos_predicted_hoo/lola-PY_TSRLRSHR_248.pdf]

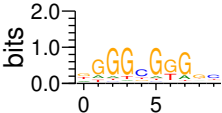

WebLogo 3.6.0

Supplement: SUPPLEMENTAL_Matl.zip [file luna_KSHARDERRDHL_249.pdf › SUPPLEMENTAL_Matl/rCLAMPS/my_results/zf-C2H2_250_50_seedFFSdiverse6/0_logos_predicted_hoo/luna_KSHARDERRDHL_249.pdf]

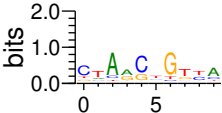

WebLogo 3.6.0

Supplement: SUPPLEMENTAL_Matl.zip [file ovo_LRLRDFDRQCSS_250.pdf › SUPPLEMENTAL_Matl/rCLAMPS/my_results/zf-C2H2_250_50_seedFFSdiverse6/0_logos_predicted_hoo/ovo_LRLRDFDRQCSS_250.pdf]
