# Supplementary figures and images for: Learning probabilistic protein–DNA recognition codes from DNA-binding specificities using structural mappings (part 16 of 25)
Source: HighWire-hosted journal article supplement (doi:10.1101/gr.276606.122), 2022-09-01

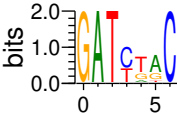

WebLogo 3.6.0

Supplement: SUPPLEMENTAL_Matl.zip [file T131857_2.00_RSTTVSNR_208.pdf › SUPPLEMENTAL_Matl/rCLAMPS/my_results/zf-C2H2_250_50_seedFFSdiverse6/0_logos_aligned_hoo/T131857_2.00_RSTTVSNR_208.pdf]

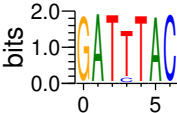

WebLogo 3.6.0

Supplement: SUPPLEMENTAL_Matl.zip [file T131858_2.00_RSTTVSNR_209.pdf › SUPPLEMENTAL_Matl/rCLAMPS/my_results/zf-C2H2_250_50_seedFFSdiverse6/0_logos_aligned_hoo/T131858_2.00_RSTTVSNR_209.pdf]

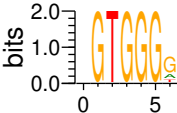

WebLogo 3.6.0

Supplement: SUPPLEMENTAL_Matl.zip [file T131859_2.00_REHRRDLR_210.pdf › SUPPLEMENTAL_Matl/rCLAMPS/my_results/zf-C2H2_250_50_seedFFSdiverse6/0_logos_aligned_hoo/T131859_2.00_REHRRDLR_210.pdf]

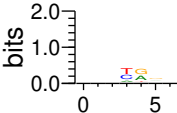

WebLogo 3.6.0

Supplement: SUPPLEMENTAL_Matl.zip [file T137733_2.00_DSNALSYK_211.pdf › SUPPLEMENTAL_Matl/rCLAMPS/my_results/zf-C2H2_250_50_seedFFSdiverse6/0_logos_aligned_hoo/T137733_2.00_DSNALSYK_211.pdf]

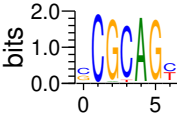

WebLogo 3.6.0

Supplement: SUPPLEMENTAL_Matl.zip [file T137734_2.00_RYNTRHDR_212.pdf › SUPPLEMENTAL_Matl/rCLAMPS/my_results/zf-C2H2_250_50_seedFFSdiverse6/0_logos_aligned_hoo/T137734_2.00_RYNTRHDR_212.pdf]

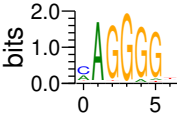

WebLogo 3.6.0

Supplement: SUPPLEMENTAL_Matl.zip [file T144838_2.00_REHRRDNQ_213.pdf › SUPPLEMENTAL_Matl/rCLAMPS/my_results/zf-C2H2_250_50_seedFFSdiverse6/0_logos_aligned_hoo/T144838_2.00_REHRRDNQ_213.pdf]

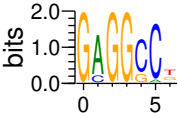

Supplement: SUPPLEMENTAL_Matl.zip [file T144839_2.00_TTHRRDNR_214.pdf › SUPPLEMENTAL_Matl/rCLAMPS/my_results/zf-C2H2_250_50_seedFFSdiverse6/0_logos_aligned_hoo/T144839_2.00_TTHRRDNR_214.pdf]

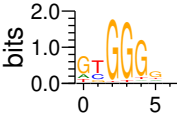

WebLogo 3.6.0

Supplement: SUPPLEMENTAL_Matl.zip [file T144840_2.00_REHRRDLR_215.pdf › SUPPLEMENTAL_Matl/rCLAMPS/my_results/zf-C2H2_250_50_seedFFSdiverse6/0_logos_aligned_hoo/T144840_2.00_REHRRDLR_215.pdf]

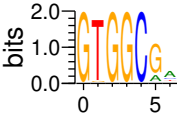

Supplement: SUPPLEMENTAL_Matl.zip [file T144842_2.00_RYDRRDAR_216.pdf › SUPPLEMENTAL_Matl/rCLAMPS/my_results/zf-C2H2_250_50_seedFFSdiverse6/0_logos_aligned_hoo/T144842_2.00_RYDRRDAR_216.pdf]

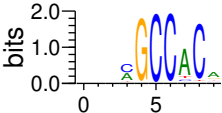

WebLogo 3.6.0

Supplement: SUPPLEMENTAL_Matl.zip [file T144845_2.00_RHNSRHDRRDAR_217.pdf › SUPPLEMENTAL_Matl/rCLAMPS/my_results/zf-C2H2_250_50_seedFFSdiverse6/0_logos_aligned_hoo/T144845_2.00_RHNSRHDRRDAR_217.pdf]

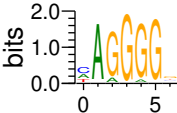

WebLogo 3.6.0

Supplement: SUPPLEMENTAL_Matl.zip [file T144846_2.00_REHRRDNQ_218.pdf › SUPPLEMENTAL_Matl/rCLAMPS/my_results/zf-C2H2_250_50_seedFFSdiverse6/0_logos_aligned_hoo/T144846_2.00_REHRRDNQ_218.pdf]

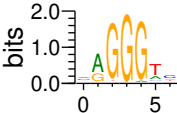

WebLogo 3.6.0

Supplement: SUPPLEMENTAL_Matl.zip [file T144848_2.00_TGHRRDNQ_219.pdf › SUPPLEMENTAL_Matl/rCLAMPS/my_results/zf-C2H2_250_50_seedFFSdiverse6/0_logos_aligned_hoo/T144848_2.00_TGHRRDNQ_219.pdf]

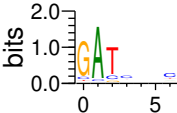

Supplement: SUPPLEMENTAL_Matl.zip [file T144849_2.00_RSSTVSNR_220.pdf › SUPPLEMENTAL_Matl/rCLAMPS/my_results/zf-C2H2_250_50_seedFFSdiverse6/0_logos_aligned_hoo/T144849_2.00_RSSTVSNR_220.pdf]

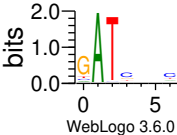

Supplement: SUPPLEMENTAL_Matl.zip [file T144850_2.00_RSSIVSNR_221.pdf › SUPPLEMENTAL_Matl/rCLAMPS/my_results/zf-C2H2_250_50_seedFFSdiverse6/0_logos_aligned_hoo/T144850_2.00_RSSIVSNR_221.pdf]

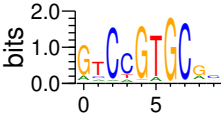

WebLogo 3.6.0

Supplement: SUPPLEMENTAL_Matl.zip [file T144852_2.00_RSDRQSAVDSSR_222.pdf › SUPPLEMENTAL_Matl/rCLAMPS/my_results/zf-C2H2_250_50_seedFFSdiverse6/0_logos_aligned_hoo/T144852_2.00_RSDRQSAVDSSR_222.pdf]

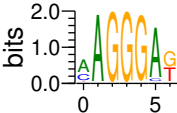

WebLogo 3.6.0

Supplement: SUPPLEMENTAL_Matl.zip [file T144853_2.00_REHRRDNQ_223.pdf › SUPPLEMENTAL_Matl/rCLAMPS/my_results/zf-C2H2_250_50_seedFFSdiverse6/0_logos_aligned_hoo/T144853_2.00_REHRRDNQ_223.pdf]

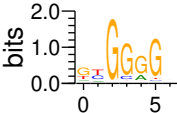

WebLogo 3.6.0

Supplement: SUPPLEMENTAL_Matl.zip [file T144861_2.00_REHRRDLR_224.pdf › SUPPLEMENTAL_Matl/rCLAMPS/my_results/zf-C2H2_250_50_seedFFSdiverse6/0_logos_aligned_hoo/T144861_2.00_REHRRDLR_224.pdf]

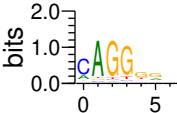

WebLogo 3.6.0

Supplement: SUPPLEMENTAL_Matl.zip [file T144866_2.00_REHRRDNQ_225.pdf › SUPPLEMENTAL_Matl/rCLAMPS/my_results/zf-C2H2_250_50_seedFFSdiverse6/0_logos_aligned_hoo/T144866_2.00_REHRRDNQ_225.pdf]

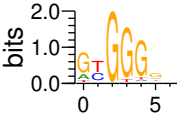

WebLogo 3.6.0

Supplement: SUPPLEMENTAL_Matl.zip [file T144867_2.00_REHRRDLR_226.pdf › SUPPLEMENTAL_Matl/rCLAMPS/my_results/zf-C2H2_250_50_seedFFSdiverse6/0_logos_aligned_hoo/T144867_2.00_REHRRDLR_226.pdf]

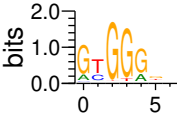

WebLogo 3.6.0

Supplement: SUPPLEMENTAL_Matl.zip [file T144868_2.00_HKHRRDIR_227.pdf › SUPPLEMENTAL_Matl/rCLAMPS/my_results/zf-C2H2_250_50_seedFFSdiverse6/0_logos_aligned_hoo/T144868_2.00_HKHRRDIR_227.pdf]

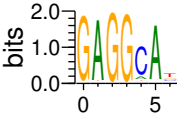

WebLogo 3.6.0

Supplement: SUPPLEMENTAL_Matl.zip [file T144869_2.00_SKERAAQR_228.pdf › SUPPLEMENTAL_Matl/rCLAMPS/my_results/zf-C2H2_250_50_seedFFSdiverse6/0_logos_aligned_hoo/T144869_2.00_SKERAAQR_228.pdf]

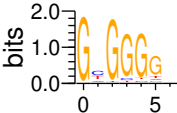

WebLogo 3.6.0

Supplement: SUPPLEMENTAL_Matl.zip [file T144873_2.00_REHRRDLR_229.pdf › SUPPLEMENTAL_Matl/rCLAMPS/my_results/zf-C2H2_250_50_seedFFSdiverse6/0_logos_aligned_hoo/T144873_2.00_REHRRDLR_229.pdf]

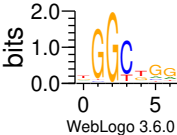

Supplement: SUPPLEMENTAL_Matl.zip [file T144874_2.00_RENSRHDR_230.pdf › SUPPLEMENTAL_Matl/rCLAMPS/my_results/zf-C2H2_250_50_seedFFSdiverse6/0_logos_aligned_hoo/T144874_2.00_RENSRHDR_230.pdf]

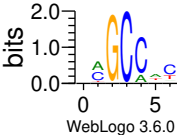

Supplement: SUPPLEMENTAL_Matl.zip [file T144877_2.00_RYNSRHDR_231.pdf › SUPPLEMENTAL_Matl/rCLAMPS/my_results/zf-C2H2_250_50_seedFFSdiverse6/0_logos_aligned_hoo/T144877_2.00_RYNSRHDR_231.pdf]

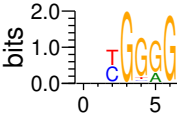

WebLogo 3.6.0

Supplement: SUPPLEMENTAL_Matl.zip [file T144879_2.00_REHRRDER_232.pdf › SUPPLEMENTAL_Matl/rCLAMPS/my_results/zf-C2H2_250_50_seedFFSdiverse6/0_logos_aligned_hoo/T144879_2.00_REHRRDER_232.pdf]

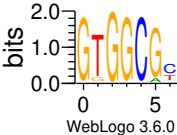

Supplement: SUPPLEMENTAL_Matl.zip [file T144882_2.00_RHDRRDAR_233.pdf › SUPPLEMENTAL_Matl/rCLAMPS/my_results/zf-C2H2_250_50_seedFFSdiverse6/0_logos_aligned_hoo/T144882_2.00_RHDRRDAR_233.pdf]

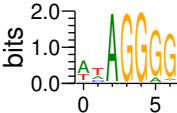

WebLogo 3.6.0

Supplement: SUPPLEMENTAL_Matl.zip [file T144969_2.00_REHRRDNQ_234.pdf › SUPPLEMENTAL_Matl/rCLAMPS/my_results/zf-C2H2_250_50_seedFFSdiverse6/0_logos_aligned_hoo/T144969_2.00_REHRRDNQ_234.pdf]

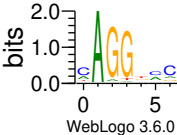

Supplement: SUPPLEMENTAL_Matl.zip [file T144982_2.00_REHRRDNQ_235.pdf › SUPPLEMENTAL_Matl/rCLAMPS/my_results/zf-C2H2_250_50_seedFFSdiverse6/0_logos_aligned_hoo/T144982_2.00_REHRRDNQ_235.pdf]

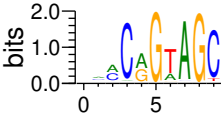

WebLogo 3.6.0

Supplement: SUPPLEMENTAL_Matl.zip [file bowl_KYNIRDHDQRTV_236.pdf › SUPPLEMENTAL_Matl/rCLAMPS/my_results/zf-C2H2_250_50_seedFFSdiverse6/0_logos_aligned_hoo/bowl_KYNIRDHDQRTV_236.pdf]

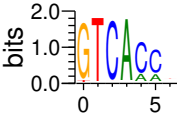

WebLogo 3.6.0

Supplement: SUPPLEMENTAL_Matl.zip [file disco_DGAISRSR_237.pdf › SUPPLEMENTAL_Matl/rCLAMPS/my_results/zf-C2H2_250_50_seedFFSdiverse6/0_logos_aligned_hoo/disco_DGAISRSR_237.pdf]

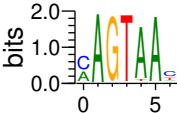

WebLogo 3.6.0

Supplement: SUPPLEMENTAL_Matl.zip [file fru_ISVHRDNA_238.pdf › SUPPLEMENTAL_Matl/rCLAMPS/my_results/zf-C2H2_250_50_seedFFSdiverse6/0_logos_aligned_hoo/fru_ISVHRDNA_238.pdf]

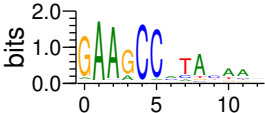

Supplement: SUPPLEMENTAL_Matl.zip [file gl_QANAQSSTDSTKQGNR_239.pdf › SUPPLEMENTAL_Matl/rCLAMPS/my_results/zf-C2H2_250_50_seedFFSdiverse6/0_logos_aligned_hoo/gl_QANAQSSTDSTKQGNR_239.pdf]

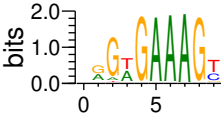

Supplement: SUPPLEMENTAL_Matl.zip [file ken_MWNTQAHKSQER_240.pdf › SUPPLEMENTAL_Matl/rCLAMPS/my_results/zf-C2H2_250_50_seedFFSdiverse6/0_logos_aligned_hoo/ken_MWNTQAHKSQER_240.pdf]

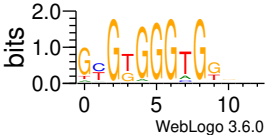

Supplement: SUPPLEMENTAL_Matl.zip [file klu_LDRKRDMRRDHTRDMR_241.pdf › SUPPLEMENTAL_Matl/rCLAMPS/my_results/zf-C2H2_250_50_seedFFSdiverse6/0_logos_aligned_hoo/klu_LDRKRDMRRDHTRDMR_241.pdf]

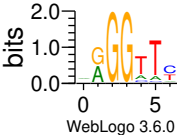

Supplement: SUPPLEMENTAL_Matl.zip [file lola-PA_RSARRDSR_243.pdf › SUPPLEMENTAL_Matl/rCLAMPS/my_results/zf-C2H2_250_50_seedFFSdiverse6/0_logos_aligned_hoo/lola-PA_RSARRDSR_243.pdf]

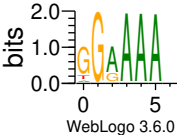

Supplement: SUPPLEMENTAL_Matl.zip [file lola-PC_LSSNQMHR_244.pdf › SUPPLEMENTAL_Matl/rCLAMPS/my_results/zf-C2H2_250_50_seedFFSdiverse6/0_logos_aligned_hoo/lola-PC_LSSNQMHR_244.pdf]

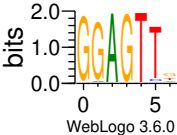

Supplement: SUPPLEMENTAL_Matl.zip [file lola-PF_DSSRQSHR_245.pdf › SUPPLEMENTAL_Matl/rCLAMPS/my_results/zf-C2H2_250_50_seedFFSdiverse6/0_logos_aligned_hoo/lola-PF_DSSRQSHR_245.pdf]

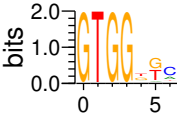

Supplement: SUPPLEMENTAL_Matl.zip [file lola-PL_RSARRDSR_246.pdf › SUPPLEMENTAL_Matl/rCLAMPS/my_results/zf-C2H2_250_50_seedFFSdiverse6/0_logos_aligned_hoo/lola-PL_RSARRDSR_246.pdf]

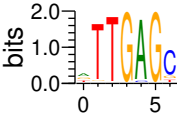

Supplement: SUPPLEMENTAL_Matl.zip [file lola-PU_YKNRYHSM_247.pdf › SUPPLEMENTAL_Matl/rCLAMPS/my_results/zf-C2H2_250_50_seedFFSdiverse6/0_logos_aligned_hoo/lola-PU_YKNRYHSM_247.pdf]

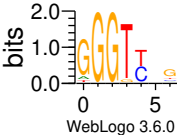

Supplement: SUPPLEMENTAL_Matl.zip [file lola-PY_TSRLRSHR_248.pdf › SUPPLEMENTAL_Matl/rCLAMPS/my_results/zf-C2H2_250_50_seedFFSdiverse6/0_logos_aligned_hoo/lola-PY_TSRLRSHR_248.pdf]

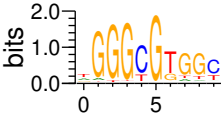

WebLogo 3.6.0

Supplement: SUPPLEMENTAL_Matl.zip [file luna_KSHARDERRDHL_249.pdf › SUPPLEMENTAL_Matl/rCLAMPS/my_results/zf-C2H2_250_50_seedFFSdiverse6/0_logos_aligned_hoo/luna_KSHARDERRDHL_249.pdf]

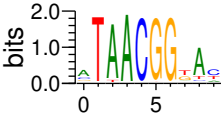

Supplement: SUPPLEMENTAL_Matl.zip [file ovo_LRLRDFDRQCSS_250.pdf › SUPPLEMENTAL_Matl/rCLAMPS/my_results/zf-C2H2_250_50_seedFFSdiverse6/0_logos_aligned_hoo/ovo_LRLRDFDRQCSS_250.pdf]

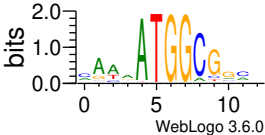

Supplement: SUPPLEMENTAL_Matl.zip [file pho_DSAKESKRLFNTQTNS_251.pdf › SUPPLEMENTAL_Matl/rCLAMPS/my_results/zf-C2H2_250_50_seedFFSdiverse6/0_logos_aligned_hoo/pho_DSAKESKRLFNTQTNS_251.pdf]

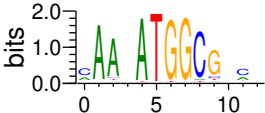

WebLogo 3.6.0

Supplement: SUPPLEMENTAL_Matl.zip [file phol_NSAKESKRLFNTQTNS_252.pdf › SUPPLEMENTAL_Matl/rCLAMPS/my_results/zf-C2H2_250_50_seedFFSdiverse6/0_logos_aligned_hoo/phol_NSAKESKRLFNTQTNS_252.pdf]

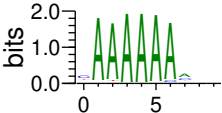

WebLogo 3.6.0

Supplement: SUPPLEMENTAL_Matl.zip [file rn_NSYQQSHQQSNS_253.pdf › SUPPLEMENTAL_Matl/rCLAMPS/my_results/zf-C2H2_250_50_seedFFSdiverse6/0_logos_aligned_hoo/rn_NSYQQSHQQSNS_253.pdf]

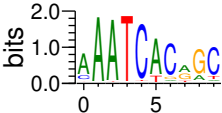

WebLogo 3.6.0

Supplement: SUPPLEMENTAL_Matl.zip [file sens_RSTTQSDKQSNT_254.pdf › SUPPLEMENTAL_Matl/rCLAMPS/my_results/zf-C2H2_250_50_seedFFSdiverse6/0_logos_aligned_hoo/sens_RSTTQSDKQSNT_254.pdf]

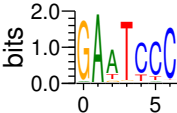

WebLogo 3.6.0

Supplement: SUPPLEMENTAL_Matl.zip [file shn-F1-2_KSVKTSNK_255.pdf › SUPPLEMENTAL_Matl/rCLAMPS/my_results/zf-C2H2_250_50_seedFFSdiverse6/0_logos_aligned_hoo/shn-F1-2_KSVKTSNK_255.pdf]

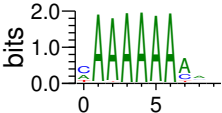

WebLogo 3.6.0

Supplement: SUPPLEMENTAL_Matl.zip [file sqz_NSYQQSHQQSNS_256.pdf › SUPPLEMENTAL_Matl/rCLAMPS/my_results/zf-C2H2_250_50_seedFFSdiverse6/0_logos_aligned_hoo/sqz_NSYQQSHQQSNS_256.pdf]

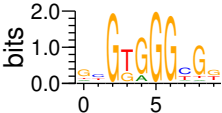

WebLogo 3.6.0

Supplement: SUPPLEMENTAL_Matl.zip [file sr_RDERRDHTRDER_257.pdf › SUPPLEMENTAL_Matl/rCLAMPS/my_results/zf-C2H2_250_50_seedFFSdiverse6/0_logos_aligned_hoo/sr_RDERRDHTRDER_257.pdf]

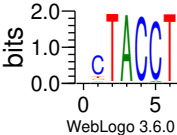

Supplement: SUPPLEMENTAL_Matl.zip [file vfl_HTDRRDHK_258.pdf › SUPPLEMENTAL_Matl/rCLAMPS/my_results/zf-C2H2_250_50_seedFFSdiverse6/0_logos_aligned_hoo/vfl_HTDRRDHK_258.pdf]

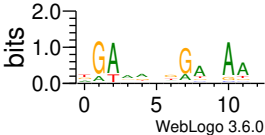

Supplement: SUPPLEMENTAL_Matl.zip [file Blimp-1_QSNVQAHKSSNTQVHL_0.pdf › SUPPLEMENTAL_Matl/rCLAMPS/my_results/zf-C2H2_250_50_seedFFSdiverse6/0_logos_predicted_hoo/Blimp-1_QSNVQAHKSSNTQVHL_0.pdf]

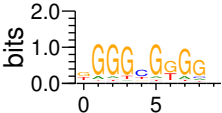

WebLogo 3.6.0

Supplement: SUPPLEMENTAL_Matl.zip [file Bteb2_KAHARDERRDHK_1.pdf › SUPPLEMENTAL_Matl/rCLAMPS/my_results/zf-C2H2_250_50_seedFFSdiverse6/0_logos_predicted_hoo/Bteb2_KAHARDERRDHK_1.pdf]

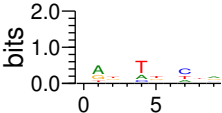

WebLogo 3.6.0

Supplement: SUPPLEMENTAL_Matl.zip [file CG10267_YSVSYHSKLHHQ_2.pdf › SUPPLEMENTAL_Matl/rCLAMPS/my_results/zf-C2H2_250_50_seedFFSdiverse6/0_logos_predicted_hoo/CG10267_YSVSYHSKLHHQ_2.pdf]

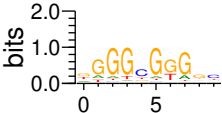

WebLogo 3.6.0

Supplement: SUPPLEMENTAL_Matl.zip [file CG12029_KSHARDERRDHL_3.pdf › SUPPLEMENTAL_Matl/rCLAMPS/my_results/zf-C2H2_250_50_seedFFSdiverse6/0_logos_predicted_hoo/CG12029_KSHARDERRDHL_3.pdf]

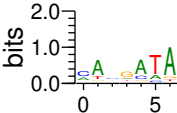

WebLogo 3.6.0

Supplement: SUPPLEMENTAL_Matl.zip [file CG12236-PB_TVNRNYSE_5.pdf › SUPPLEMENTAL_Matl/rCLAMPS/my_results/zf-C2H2_250_50_seedFFSdiverse6/0_logos_predicted_hoo/CG12236-PB_TVNRNYSE_5.pdf]

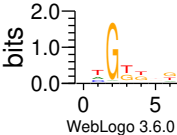

Supplement: SUPPLEMENTAL_Matl.zip [file CG12236_SNARTWST_4.pdf › SUPPLEMENTAL_Matl/rCLAMPS/my_results/zf-C2H2_250_50_seedFFSdiverse6/0_logos_predicted_hoo/CG12236_SNARTWST_4.pdf]

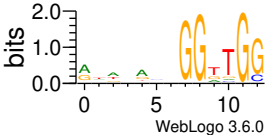

Supplement: SUPPLEMENTAL_Matl.zip [file CG17181_SPAMRWLGDSNALSYK_6.pdf › SUPPLEMENTAL_Matl/rCLAMPS/my_results/zf-C2H2_250_50_seedFFSdiverse6/0_logos_predicted_hoo/CG17181_SPAMRWLGDSNALSYK_6.pdf]

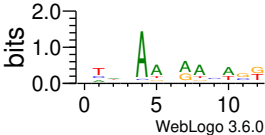

Supplement: SUPPLEMENTAL_Matl.zip [file CG2052_SHQQQSHQQSNQTSST_7.pdf › SUPPLEMENTAL_Matl/rCLAMPS/my_results/zf-C2H2_250_50_seedFFSdiverse6/0_logos_predicted_hoo/CG2052_SHQQQSHQQSNQTSST_7.pdf]

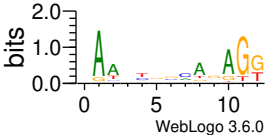

Supplement: SUPPLEMENTAL_Matl.zip [file CG31670_AYNRQSTRRSTTQGNN_8.pdf › SUPPLEMENTAL_Matl/rCLAMPS/my_results/zf-C2H2_250_50_seedFFSdiverse6/0_logos_predicted_hoo/CG31670_AYNRQSTRRSTTQGNN_8.pdf]

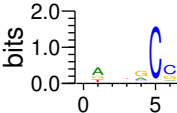

WebLogo 3.6.0

Supplement: SUPPLEMENTAL_Matl.zip [file CG32830_ERVQHNSN_9.pdf › SUPPLEMENTAL_Matl/rCLAMPS/my_results/zf-C2H2_250_50_seedFFSdiverse6/0_logos_predicted_hoo/CG32830_ERVQHNSN_9.pdf]

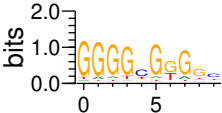

WebLogo 3.6.0

Supplement: SUPPLEMENTAL_Matl.zip [file CG5669_KSHARDERRDHR_10.pdf › SUPPLEMENTAL_Matl/rCLAMPS/my_results/zf-C2H2_250_50_seedFFSdiverse6/0_logos_predicted_hoo/CG5669_KSHARDERRDHR_10.pdf]



WebLogo 3.6.0

Supplement: SUPPLEMENTAL_Matl.zip [file CG9895_KSHARDERRDHL_11.pdf › SUPPLEMENTAL_Matl/rCLAMPS/my_results/zf-C2H2_250_50_seedFFSdiverse6/0_logos_predicted_hoo/CG9895_KSHARDERRDHL_11.pdf]

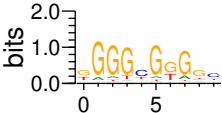

WebLogo 3.6.0

Supplement: SUPPLEMENTAL_Matl.zip [file Sp1_KSHARDERRDHK_12.pdf › SUPPLEMENTAL_Matl/rCLAMPS/my_results/zf-C2H2_250_50_seedFFSdiverse6/0_logos_predicted_hoo/Sp1_KSHARDERRDHK_12.pdf]

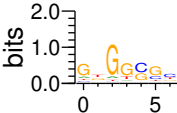

WebLogo 3.6.0

Supplement: SUPPLEMENTAL_Matl.zip [file T078154_2.00_RHDRRDAR_13.pdf › SUPPLEMENTAL_Matl/rCLAMPS/my_results/zf-C2H2_250_50_seedFFSdiverse6/0_logos_predicted_hoo/T078154_2.00_RHDRRDAR_13.pdf]

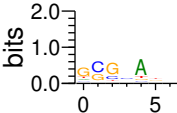

WebLogo 3.6.0

Supplement: SUPPLEMENTAL_Matl.zip [file T078167_2.00_RNNERHDR_14.pdf › SUPPLEMENTAL_Matl/rCLAMPS/my_results/zf-C2H2_250_50_seedFFSdiverse6/0_logos_predicted_hoo/T078167_2.00_RNNERHDR_14.pdf]

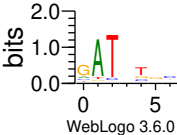

Supplement: SUPPLEMENTAL_Matl.zip [file T078175_2.00_RSSIVSNR_15.pdf › SUPPLEMENTAL_Matl/rCLAMPS/my_results/zf-C2H2_250_50_seedFFSdiverse6/0_logos_predicted_hoo/T078175_2.00_RSSIVSNR_15.pdf]

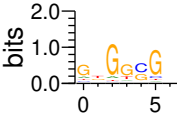

Supplement: SUPPLEMENTAL_Matl.zip [file T078179_2.00_RYDRRDAR_16.pdf › SUPPLEMENTAL_Matl/rCLAMPS/my_results/zf-C2H2_250_50_seedFFSdiverse6/0_logos_predicted_hoo/T078179_2.00_RYDRRDAR_16.pdf]

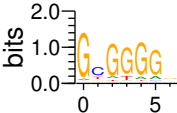

Supplement: SUPPLEMENTAL_Matl.zip [file T078185_2.00_REHRRDER_17.pdf › SUPPLEMENTAL_Matl/rCLAMPS/my_results/zf-C2H2_250_50_seedFFSdiverse6/0_logos_predicted_hoo/T078185_2.00_REHRRDER_17.pdf]

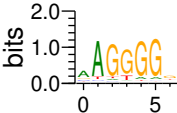

WebLogo 3.6.0

Supplement: SUPPLEMENTAL_Matl.zip [file T078186_2.00_REHRRDNQ_18.pdf › SUPPLEMENTAL_Matl/rCLAMPS/my_results/zf-C2H2_250_50_seedFFSdiverse6/0_logos_predicted_hoo/T078186_2.00_REHRRDNQ_18.pdf]

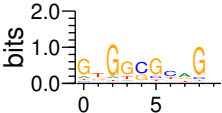

WebLogo 3.6.0

Supplement: SUPPLEMENTAL_Matl.zip [file T078189_2.00_RYNSRHDRRDAR_19.pdf › SUPPLEMENTAL_Matl/rCLAMPS/my_results/zf-C2H2_250_50_seedFFSdiverse6/0_logos_predicted_hoo/T078189_2.00_RYNSRHDRRDAR_19.pdf]



WebLogo 3.6.0

Supplement: SUPPLEMENTAL_Matl.zip [file T078206_2.00_RYNSRHDRRDAR_20.pdf › SUPPLEMENTAL_Matl/rCLAMPS/my_results/zf-C2H2_250_50_seedFFSdiverse6/0_logos_predicted_hoo/T078206_2.00_RYNSRHDRRDAR_20.pdf]



Supplement: SUPPLEMENTAL_Matl.zip [file T078207_2.00_RYDRRDAR_21.pdf › SUPPLEMENTAL_Matl/rCLAMPS/my_results/zf-C2H2_250_50_seedFFSdiverse6/0_logos_predicted_hoo/T078207_2.00_RYDRRDAR_21.pdf]

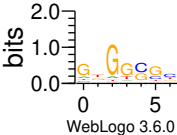

Supplement: SUPPLEMENTAL_Matl.zip [file T078214_2.00_RHDRRDAR_22.pdf › SUPPLEMENTAL_Matl/rCLAMPS/my_results/zf-C2H2_250_50_seedFFSdiverse6/0_logos_predicted_hoo/T078214_2.00_RHDRRDAR_22.pdf]

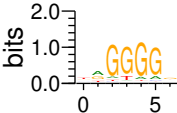

WebLogo 3.6.0

Supplement: SUPPLEMENTAL_Matl.zip [file T078219_2.00_REHRRDNA_23.pdf › SUPPLEMENTAL_Matl/rCLAMPS/my_results/zf-C2H2_250_50_seedFFSdiverse6/0_logos_predicted_hoo/T078219_2.00_REHRRDNA_23.pdf]



Supplement: SUPPLEMENTAL_Matl.zip [file T078228_2.00_REHRRDER_24.pdf › SUPPLEMENTAL_Matl/rCLAMPS/my_results/zf-C2H2_250_50_seedFFSdiverse6/0_logos_predicted_hoo/T078228_2.00_REHRRDER_24.pdf]

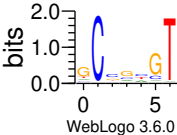

Supplement: SUPPLEMENTAL_Matl.zip [file T080858_2.00_WWSEFSDR_25.pdf › SUPPLEMENTAL_Matl/rCLAMPS/my_results/zf-C2H2_250_50_seedFFSdiverse6/0_logos_predicted_hoo/T080858_2.00_WWSEFSDR_25.pdf]



Supplement: SUPPLEMENTAL_Matl.zip [file T080990_2.00_RHDRRDAR_26.pdf › SUPPLEMENTAL_Matl/rCLAMPS/my_results/zf-C2H2_250_50_seedFFSdiverse6/0_logos_predicted_hoo/T080990_2.00_RHDRRDAR_26.pdf]



WebLogo 3.6.0

Supplement: SUPPLEMENTAL_Matl.zip [file T082403_2.00_REHRRDNQ_27.pdf › SUPPLEMENTAL_Matl/rCLAMPS/my_results/zf-C2H2_250_50_seedFFSdiverse6/0_logos_predicted_hoo/T082403_2.00_REHRRDNQ_27.pdf]



WebLogo 3.6.0

Supplement: SUPPLEMENTAL_Matl.zip [file T082404_2.00_REHRRDNQ_28.pdf › SUPPLEMENTAL_Matl/rCLAMPS/my_results/zf-C2H2_250_50_seedFFSdiverse6/0_logos_predicted_hoo/T082404_2.00_REHRRDNQ_28.pdf]



# WebLogo 3.6.0

Supplement: SUPPLEMENTAL_Matl.zip [file T082423_2.00_REHRRDNQ_29.pdf › SUPPLEMENTAL_Matl/rCLAMPS/my_results/zf-C2H2_250_50_seedFFSdiverse6/0_logos_predicted_hoo/T082423_2.00_REHRRDNQ_29.pdf]



WebLogo 3.6.0

Supplement: SUPPLEMENTAL_Matl.zip [file T082432_2.00_REHRRDNQ_30.pdf › SUPPLEMENTAL_Matl/rCLAMPS/my_results/zf-C2H2_250_50_seedFFSdiverse6/0_logos_predicted_hoo/T082432_2.00_REHRRDNQ_30.pdf]



WebLogo 3.6.0

Supplement: SUPPLEMENTAL_Matl.zip [file T082498_2.00_REHRRDNQ_31.pdf › SUPPLEMENTAL_Matl/rCLAMPS/my_results/zf-C2H2_250_50_seedFFSdiverse6/0_logos_predicted_hoo/T082498_2.00_REHRRDNQ_31.pdf]



WebLogo 3.6.0

Supplement: SUPPLEMENTAL_Matl.zip [file T082506_2.00_REHRRDNQ_32.pdf › SUPPLEMENTAL_Matl/rCLAMPS/my_results/zf-C2H2_250_50_seedFFSdiverse6/0_logos_predicted_hoo/T082506_2.00_REHRRDNQ_32.pdf]



WebLogo 3.6.0

Supplement: SUPPLEMENTAL_Matl.zip [file T082509_2.00_REHRRDNQ_33.pdf › SUPPLEMENTAL_Matl/rCLAMPS/my_results/zf-C2H2_250_50_seedFFSdiverse6/0_logos_predicted_hoo/T082509_2.00_REHRRDNQ_33.pdf]

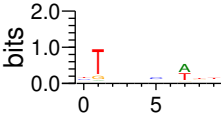

WebLogo 3.6.0

Supplement: SUPPLEMENTAL_Matl.zip [file T094781_2.00_LHQTDSAKSASA_34.pdf › SUPPLEMENTAL_Matl/rCLAMPS/my_results/zf-C2H2_250_50_seedFFSdiverse6/0_logos_predicted_hoo/T094781_2.00_LHQTDSAKSASA_34.pdf]

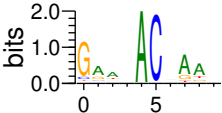

Supplement: SUPPLEMENTAL_Matl.zip [file T094790_2.00_QSENGTTNQTQR_35.pdf › SUPPLEMENTAL_Matl/rCLAMPS/my_results/zf-C2H2_250_50_seedFFSdiverse6/0_logos_predicted_hoo/T094790_2.00_QSENGTTNQTQR_35.pdf]



WebLogo 3.6.0

Supplement: SUPPLEMENTAL_Matl.zip [file T094796_2.00_KSHARDERRDHL_36.pdf › SUPPLEMENTAL_Matl/rCLAMPS/my_results/zf-C2H2_250_50_seedFFSdiverse6/0_logos_predicted_hoo/T094796_2.00_KSHARDERRDHL_36.pdf]

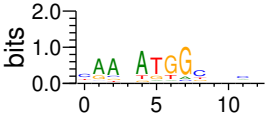

Supplement: SUPPLEMENTAL_Matl.zip [file T094823_2.00_DSAKESKRLFNTQTNS_37.pdf › SUPPLEMENTAL_Matl/rCLAMPS/my_results/zf-C2H2_250_50_seedFFSdiverse6/0_logos_predicted_hoo/T094823_2.00_DSAKESKRLFNTQTNS_37.pdf]



WebLogo 3.6.0

Supplement: SUPPLEMENTAL_Matl.zip [file T094828_2.00_KSHARDERRDHL_38.pdf › SUPPLEMENTAL_Matl/rCLAMPS/my_results/zf-C2H2_250_50_seedFFSdiverse6/0_logos_predicted_hoo/T094828_2.00_KSHARDERRDHL_38.pdf]

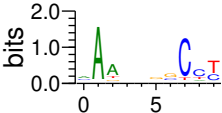

WebLogo 3.6.0

Supplement: SUPPLEMENTAL_Matl.zip [file T094834_2.00_WSERRSTLQSNQ_39.pdf › SUPPLEMENTAL_Matl/rCLAMPS/my_results/zf-C2H2_250_50_seedFFSdiverse6/0_logos_predicted_hoo/T094834_2.00_WSERRSTLQSNQ_39.pdf]



WebLogo 3.6.0

Supplement: SUPPLEMENTAL_Matl.zip [file T094844_2.00_KSHARDERRDHK_40.pdf › SUPPLEMENTAL_Matl/rCLAMPS/my_results/zf-C2H2_250_50_seedFFSdiverse6/0_logos_predicted_hoo/T094844_2.00_KSHARDERRDHK_40.pdf]



WebLogo 3.6.0

Supplement: SUPPLEMENTAL_Matl.zip [file T094848_2.00_KSHARDERRDHL_41.pdf › SUPPLEMENTAL_Matl/rCLAMPS/my_results/zf-C2H2_250_50_seedFFSdiverse6/0_logos_predicted_hoo/T094848_2.00_KSHARDERRDHL_41.pdf]



WebLogo 3.6.0

Supplement: SUPPLEMENTAL_Matl.zip [file T094864_2.00_KSHARDERRDHL_42.pdf › SUPPLEMENTAL_Matl/rCLAMPS/my_results/zf-C2H2_250_50_seedFFSdiverse6/0_logos_predicted_hoo/T094864_2.00_KSHARDERRDHL_42.pdf]



WebLogo 3.6.0

Supplement: SUPPLEMENTAL_Matl.zip [file T094867_2.00_KSHARDERRDHL_43.pdf › SUPPLEMENTAL_Matl/rCLAMPS/my_results/zf-C2H2_250_50_seedFFSdiverse6/0_logos_predicted_hoo/T094867_2.00_KSHARDERRDHL_43.pdf]



WebLogo 3.6.0

Supplement: SUPPLEMENTAL_Matl.zip [file T094868_2.00_KSHARDERRDHK_44.pdf › SUPPLEMENTAL_Matl/rCLAMPS/my_results/zf-C2H2_250_50_seedFFSdiverse6/0_logos_predicted_hoo/T094868_2.00_KSHARDERRDHK_44.pdf]

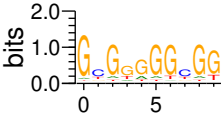

WebLogo 3.6.0

Supplement: SUPPLEMENTAL_Matl.zip [file T094872_2.00_RDERRDHTRDER_45.pdf › SUPPLEMENTAL_Matl/rCLAMPS/my_results/zf-C2H2_250_50_seedFFSdiverse6/0_logos_predicted_hoo/T094872_2.00_RDERRDHTRDER_45.pdf]



WebLogo 3.6.0

Supplement: SUPPLEMENTAL_Matl.zip [file T094882_2.00_RDERRDHTRDER_46.pdf › SUPPLEMENTAL_Matl/rCLAMPS/my_results/zf-C2H2_250_50_seedFFSdiverse6/0_logos_predicted_hoo/T094882_2.00_RDERRDHTRDER_46.pdf]

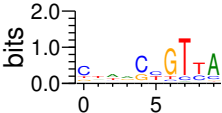

WebLogo 3.6.0

Supplement: SUPPLEMENTAL_Matl.zip [file T094895_2.00_LRMRDFDRQCSS_47.pdf › SUPPLEMENTAL_Matl/rCLAMPS/my_results/zf-C2H2_250_50_seedFFSdiverse6/0_logos_predicted_hoo/T094895_2.00_LRMRDFDRQCSS_47.pdf]

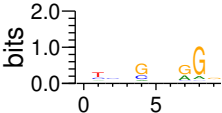

Supplement: SUPPLEMENTAL_Matl.zip [file T094898_2.00_RENINSDKDSSK_48.pdf › SUPPLEMENTAL_Matl/rCLAMPS/my_results/zf-C2H2_250_50_seedFFSdiverse6/0_logos_predicted_hoo/T094898_2.00_RENINSDKDSSK_48.pdf]



WebLogo 3.6.0

Supplement: SUPPLEMENTAL_Matl.zip [file T094904_2.00_KSHARDERRDHL_49.pdf › SUPPLEMENTAL_Matl/rCLAMPS/my_results/zf-C2H2_250_50_seedFFSdiverse6/0_logos_predicted_hoo/T094904_2.00_KSHARDERRDHL_49.pdf]
