# Supplementary figures and images for: Learning probabilistic protein–DNA recognition codes from DNA-binding specificities using structural mappings (part 24 of 25)
Source: HighWire-hosted journal article supplement (doi:10.1101/gr.276606.122), 2022-09-01

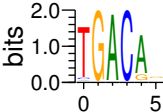

WebLogo 3.7.1

Supplement: SUPPLEMENTAL_Matl.zip [file TGIF2_cisbp.pdf › pairlogos/TGIF2_cisbp.pdf]

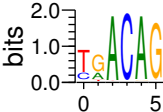

WebLogo 3.7.1

Supplement: SUPPLEMENTAL_Matl.zip [file TGIF2_predicted.pdf › pairlogos/TGIF2_predicted.pdf]

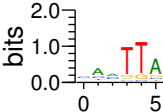

WebLogo 3.7.1

Supplement: SUPPLEMENTAL_Matl.zip [file TLX2_cisbp.pdf › pairlogos/TLX2_cisbp.pdf]

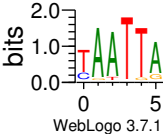

Supplement: SUPPLEMENTAL_Matl.zip [file TLX2_predicted.pdf › pairlogos/TLX2_predicted.pdf]

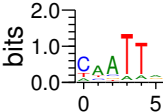

WebLogo 3.7.1

Supplement: SUPPLEMENTAL_Matl.zip [file TLX3_cisbp.pdf › pairlogos/TLX3_cisbp.pdf]



Supplement: SUPPLEMENTAL_Matl.zip [file TLX3_predicted.pdf › pairlogos/TLX3_predicted.pdf]

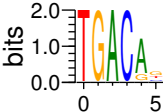

WebLogo 3.7.1

Supplement: SUPPLEMENTAL_Matl.zip [file TOS8_cisbp.pdf › pairlogos/TOS8_cisbp.pdf]

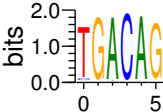

WebLogo 3.7.1

Supplement: SUPPLEMENTAL_Matl.zip [file TOS8_predicted.pdf › pairlogos/TOS8_predicted.pdf]

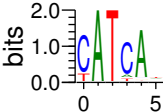

Supplement: SUPPLEMENTAL_Matl.zip [file TVAG_451170_cisbp.pdf › pairlogos/TVAG_451170_cisbp.pdf]

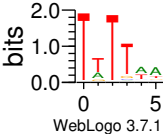

Supplement: SUPPLEMENTAL_Matl.zip [file TVAG_451170_predicted.pdf › pairlogos/TVAG_451170_predicted.pdf]

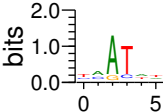

WebLogo 3.7.1

Supplement: SUPPLEMENTAL_Matl.zip [file UM04928_cisbp.pdf › pairlogos/UM04928_cisbp.pdf]

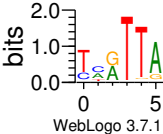

Supplement: SUPPLEMENTAL_Matl.zip [file UM04928_predicted.pdf › pairlogos/UM04928_predicted.pdf]

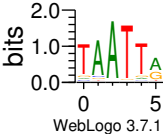

Supplement: SUPPLEMENTAL_Matl.zip [file UNCX_cisbp.pdf › pairlogos/UNCX_cisbp.pdf]

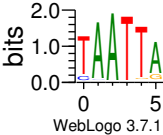

Supplement: SUPPLEMENTAL_Matl.zip [file UNCX_predicted.pdf › pairlogos/UNCX_predicted.pdf]

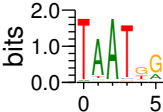

Supplement: SUPPLEMENTAL_Matl.zip [file Ubx_cisbp.pdf › pairlogos/Ubx_cisbp.pdf]

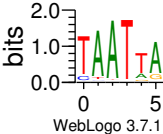

Supplement: SUPPLEMENTAL_Matl.zip [file Ubx_predicted.pdf › pairlogos/Ubx_predicted.pdf]

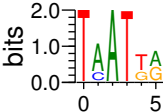

Supplement: SUPPLEMENTAL_Matl.zip [file VAX1_cisbp.pdf › pairlogos/VAX1_cisbp.pdf]

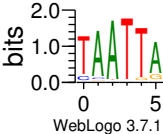

Supplement: SUPPLEMENTAL_Matl.zip [file VAX1_predicted.pdf › pairlogos/VAX1_predicted.pdf]

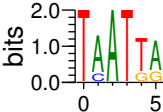

WebLogo 3.7.1

Supplement: SUPPLEMENTAL_Matl.zip [file VAX2_cisbp.pdf › pairlogos/VAX2_cisbp.pdf]



Supplement: SUPPLEMENTAL_Matl.zip [file VAX2_predicted.pdf › pairlogos/VAX2_predicted.pdf]

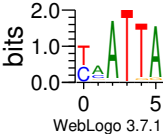

Supplement: SUPPLEMENTAL_Matl.zip [file VENTX_cisbp.pdf › pairlogos/VENTX_cisbp.pdf]

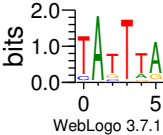

Supplement: SUPPLEMENTAL_Matl.zip [file VENTX_predicted.pdf › pairlogos/VENTX_predicted.pdf]

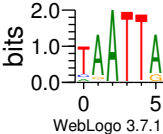

Supplement: SUPPLEMENTAL_Matl.zip [file VSX1_cisbp.pdf › pairlogos/VSX1_cisbp.pdf]

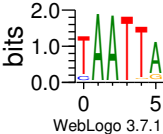

Supplement: SUPPLEMENTAL_Matl.zip [file VSX1_predicted.pdf › pairlogos/VSX1_predicted.pdf]

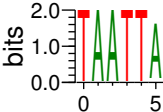

WebLogo 3.7.1

Supplement: SUPPLEMENTAL_Matl.zip [file VSX2_cisbp.pdf › pairlogos/VSX2_cisbp.pdf]



Supplement: SUPPLEMENTAL_Matl.zip [file VSX2_predicted.pdf › pairlogos/VSX2_predicted.pdf]

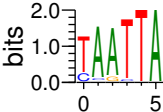

Supplement: SUPPLEMENTAL_Matl.zip [file WOX11_cisbp.pdf › pairlogos/WOX11_cisbp.pdf]

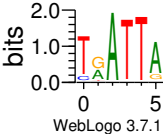

Supplement: SUPPLEMENTAL_Matl.zip [file WOX11_predicted.pdf › pairlogos/WOX11_predicted.pdf]

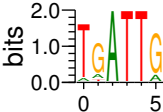

WebLogo 3.7.1

Supplement: SUPPLEMENTAL_Matl.zip [file WOX13_cisbp.pdf › pairlogos/WOX13_cisbp.pdf]

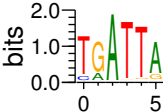

Supplement: SUPPLEMENTAL_Matl.zip [file WOX13_predicted.pdf › pairlogos/WOX13_predicted.pdf]

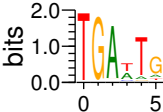

WebLogo 3.7.1

Supplement: SUPPLEMENTAL_Matl.zip [file WUS_cisbp.pdf › pairlogos/WUS_cisbp.pdf]

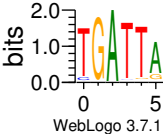

Supplement: SUPPLEMENTAL_Matl.zip [file WUS_predicted.pdf › pairlogos/WUS_predicted.pdf]

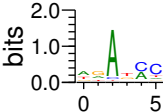

WebLogo 3.7.1

Supplement: SUPPLEMENTAL_Matl.zip [file XP_003689450.1_cisbp.pdf › pairlogos/XP_003689450.1_cisbp.pdf]

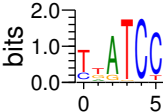

WebLogo 3.7.1

Supplement: SUPPLEMENTAL_Matl.zip [file XP_003689450.1_predicted.pdf › pairlogos/XP_003689450.1_predicted.pdf]

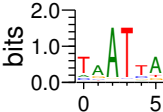

Supplement: SUPPLEMENTAL_Matl.zip [file ZFHX2_cisbp.pdf › pairlogos/ZFHX2_cisbp.pdf]

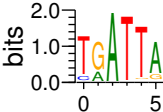

WebLogo 3.7.1

Supplement: SUPPLEMENTAL_Matl.zip [file ZFHX2_predicted.pdf › pairlogos/ZFHX2_predicted.pdf]

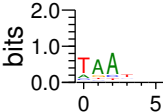

WebLogo 3.7.1

Supplement: SUPPLEMENTAL_Matl.zip [file ZHD7_cisbp.pdf › pairlogos/ZHD7_cisbp.pdf]

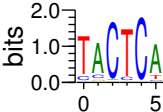

WebLogo 3.7.1

Supplement: SUPPLEMENTAL_Matl.zip [file ZHD7_predicted.pdf › pairlogos/ZHD7_predicted.pdf]

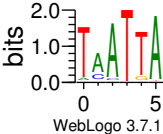

Supplement: SUPPLEMENTAL_Matl.zip [file acj6_cisbp.pdf › pairlogos/acj6_cisbp.pdf]

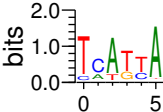

WebLogo 3.7.1

Supplement: SUPPLEMENTAL_Matl.zip [file acj6_predicted.pdf › pairlogos/acj6_predicted.pdf]

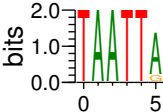

WebLogo 3.7.1

Supplement: SUPPLEMENTAL_Matl.zip [file al_cisbp.pdf › pairlogos/al_cisbp.pdf]

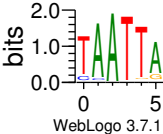

Supplement: SUPPLEMENTAL_Matl.zip [file al_predicted.pdf › pairlogos/al_predicted.pdf]

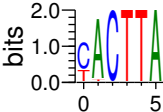

WebLogo 3.7.1

Supplement: SUPPLEMENTAL_Matl.zip [file bap_cisbp.pdf › pairlogos/bap_cisbp.pdf]

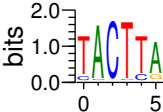

WebLogo 3.7.1

Supplement: SUPPLEMENTAL_Matl.zip [file bap_predicted.pdf › pairlogos/bap_predicted.pdf]

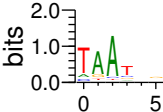

WebLogo 3.7.1

Supplement: SUPPLEMENTAL_Matl.zip [file barx1_cisbp.pdf › pairlogos/barx1_cisbp.pdf]

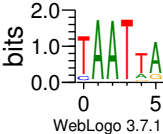

Supplement: SUPPLEMENTAL_Matl.zip [file barx1_predicted.pdf › pairlogos/barx1_predicted.pdf]

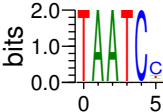

WebLogo 3.7.1

Supplement: SUPPLEMENTAL_Matl.zip [file bcd_cisbp.pdf › pairlogos/bcd_cisbp.pdf]

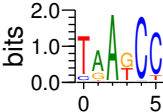

WebLogo 3.7.1

Supplement: SUPPLEMENTAL_Matl.zip [file bcd_predicted.pdf › pairlogos/bcd_predicted.pdf]

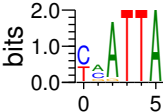

WebLogo 3.7.1

Supplement: SUPPLEMENTAL_Matl.zip [file bsh_cisbp.pdf › pairlogos/bsh_cisbp.pdf]

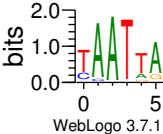

Supplement: SUPPLEMENTAL_Matl.zip [file bsh_predicted.pdf › pairlogos/bsh_predicted.pdf]

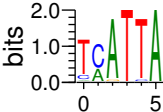

WebLogo 3.7.1

Supplement: SUPPLEMENTAL_Matl.zip [file btn_cisbp.pdf › pairlogos/btn_cisbp.pdf]

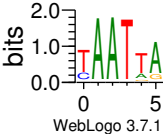

Supplement: SUPPLEMENTAL_Matl.zip [file btn_predicted.pdf › pairlogos/btn_predicted.pdf]

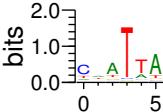

WebLogo 3.7.1

Supplement: SUPPLEMENTAL_Matl.zip [file ceh-19_cisbp.pdf › pairlogos/ceh-19_cisbp.pdf]

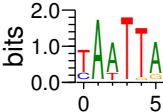

WebLogo 3.7.1

Supplement: SUPPLEMENTAL_Matl.zip [file ceh-19_predicted.pdf › pairlogos/ceh-19_predicted.pdf]

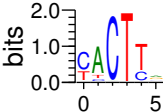

WebLogo 3.7.1

Supplement: SUPPLEMENTAL_Matl.zip [file ceh-22_cisbp.pdf › pairlogos/ceh-22_cisbp.pdf]

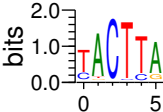

WebLogo 3.7.1

Supplement: SUPPLEMENTAL_Matl.zip [file ceh-22_predicted.pdf › pairlogos/ceh-22_predicted.pdf]

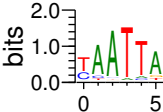

WebLogo 3.7.1

Supplement: SUPPLEMENTAL_Matl.zip [file ceh-23_cisbp.pdf › pairlogos/ceh-23_cisbp.pdf]

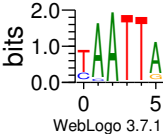

Supplement: SUPPLEMENTAL_Matl.zip [file ceh-23_predicted.pdf › pairlogos/ceh-23_predicted.pdf]

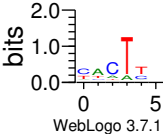

Supplement: SUPPLEMENTAL_Matl.zip [file ceh-24_cisbp.pdf › pairlogos/ceh-24_cisbp.pdf]



WebLogo 3.7.1

Supplement: SUPPLEMENTAL_Matl.zip [file ceh-24_predicted.pdf › pairlogos/ceh-24_predicted.pdf]

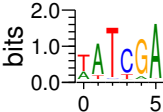

Supplement: SUPPLEMENTAL_Matl.zip [file ceh-28_cisbp.pdf › pairlogos/ceh-28_cisbp.pdf]

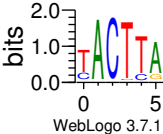

Supplement: SUPPLEMENTAL_Matl.zip [file ceh-28_predicted.pdf › pairlogos/ceh-28_predicted.pdf]

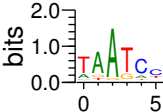

WebLogo 3.7.1

Supplement: SUPPLEMENTAL_Matl.zip [file ceh-36_cisbp.pdf › pairlogos/ceh-36_cisbp.pdf]

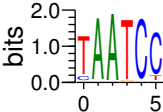

WebLogo 3.7.1

Supplement: SUPPLEMENTAL_Matl.zip [file ceh-36_predicted.pdf › pairlogos/ceh-36_predicted.pdf]

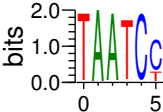

WebLogo 3.7.1

Supplement: SUPPLEMENTAL_Matl.zip [file ceh-37_cisbp.pdf › pairlogos/ceh-37_cisbp.pdf]



WebLogo 3.7.1

Supplement: SUPPLEMENTAL_Matl.zip [file ceh-37_predicted.pdf › pairlogos/ceh-37_predicted.pdf]

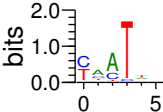

WebLogo 3.7.1

Supplement: SUPPLEMENTAL_Matl.zip [file ceh-51_cisbp.pdf › pairlogos/ceh-51_cisbp.pdf]

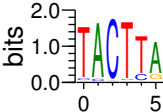

WebLogo 3.7.1

Supplement: SUPPLEMENTAL_Matl.zip [file ceh-51_predicted.pdf › pairlogos/ceh-51_predicted.pdf]

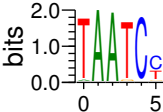

WebLogo 3.7.1

Supplement: SUPPLEMENTAL_Matl.zip [file ceh-53_cisbp.pdf › pairlogos/ceh-53_cisbp.pdf]

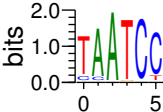

WebLogo 3.7.1

Supplement: SUPPLEMENTAL_Matl.zip [file ceh-53_predicted.pdf › pairlogos/ceh-53_predicted.pdf]

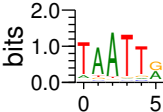

WebLogo 3.7.1

Supplement: SUPPLEMENTAL_Matl.zip [file ceh-54_cisbp.pdf › pairlogos/ceh-54_cisbp.pdf]

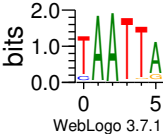

Supplement: SUPPLEMENTAL_Matl.zip [file ceh-54_predicted.pdf › pairlogos/ceh-54_predicted.pdf]

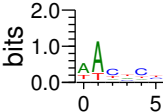

Supplement: SUPPLEMENTAL_Matl.zip [file ceh-57_cisbp.pdf › pairlogos/ceh-57_cisbp.pdf]

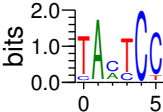

WebLogo 3.7.1

Supplement: SUPPLEMENTAL_Matl.zip [file ceh-57_predicted.pdf › pairlogos/ceh-57_predicted.pdf]

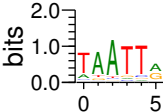

WebLogo 3.7.1

Supplement: SUPPLEMENTAL_Matl.zip [file ceh-58_cisbp.pdf › pairlogos/ceh-58_cisbp.pdf]

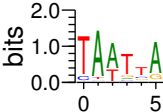

WebLogo 3.7.1

Supplement: SUPPLEMENTAL_Matl.zip [file ceh-58_predicted.pdf › pairlogos/ceh-58_predicted.pdf]

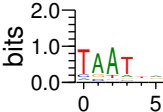

WebLogo 3.7.1

Supplement: SUPPLEMENTAL_Matl.zip [file ceh-5_cisbp.pdf › pairlogos/ceh-5_cisbp.pdf]

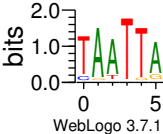

Supplement: SUPPLEMENTAL_Matl.zip [file ceh-5_predicted.pdf › pairlogos/ceh-5_predicted.pdf]

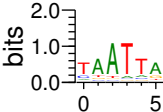

WebLogo 3.7.1

Supplement: SUPPLEMENTAL_Matl.zip [file ceh-62_cisbp.pdf › pairlogos/ceh-62_cisbp.pdf]

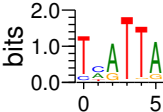

Supplement: SUPPLEMENTAL_Matl.zip [file ceh-62_predicted.pdf › pairlogos/ceh-62_predicted.pdf]

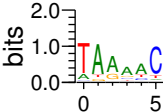

Supplement: SUPPLEMENTAL_Matl.zip [file ceh-90_cisbp.pdf › pairlogos/ceh-90_cisbp.pdf]

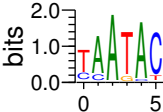

Supplement: SUPPLEMENTAL_Matl.zip [file ceh-90_predicted.pdf › pairlogos/ceh-90_predicted.pdf]

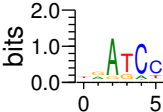

WebLogo 3.7.1

Supplement: SUPPLEMENTAL_Matl.zip [file dharma_cisbp.pdf › pairlogos/dharma_cisbp.pdf]

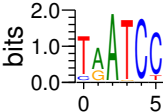

WebLogo 3.7.1

Supplement: SUPPLEMENTAL_Matl.zip [file dharma_predicted.pdf › pairlogos/dharma_predicted.pdf]

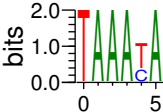

Supplement: SUPPLEMENTAL_Matl.zip [file dlx3.L_cisbp.pdf › pairlogos/dlx3.L_cisbp.pdf]

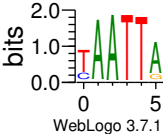

Supplement: SUPPLEMENTAL_Matl.zip [file dlx3.L_predicted.pdf › pairlogos/dlx3.L_predicted.pdf]

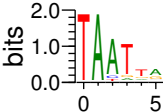

WebLogo 3.7.1

Supplement: SUPPLEMENTAL_Matl.zip [file dve_cisbp.pdf › pairlogos/dve_cisbp.pdf]

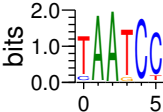

WebLogo 3.7.1

Supplement: SUPPLEMENTAL_Matl.zip [file dve_predicted.pdf › pairlogos/dve_predicted.pdf]

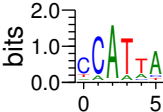

WebLogo 3.7.1

Supplement: SUPPLEMENTAL_Matl.zip [file egl-5_cisbp.pdf › pairlogos/egl-5_cisbp.pdf]

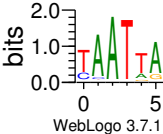

Supplement: SUPPLEMENTAL_Matl.zip [file egl-5_predicted.pdf › pairlogos/egl-5_predicted.pdf]

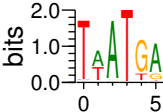

WebLogo 3.7.1

Supplement: SUPPLEMENTAL_Matl.zip [file ems_cisbp.pdf › pairlogos/ems_cisbp.pdf]

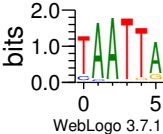

Supplement: SUPPLEMENTAL_Matl.zip [file ems_predicted.pdf › pairlogos/ems_predicted.pdf]

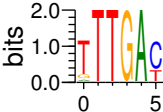

WebLogo 3.7.1

Supplement: SUPPLEMENTAL_Matl.zip [file exd_cisbp.pdf › pairlogos/exd_cisbp.pdf]

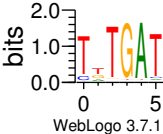

Supplement: SUPPLEMENTAL_Matl.zip [file exd_predicted.pdf › pairlogos/exd_predicted.pdf]

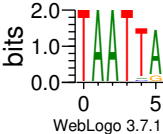

Supplement: SUPPLEMENTAL_Matl.zip [file exex_cisbp.pdf › pairlogos/exex_cisbp.pdf]

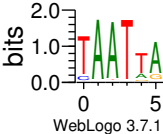

Supplement: SUPPLEMENTAL_Matl.zip [file exex_predicted.pdf › pairlogos/exex_predicted.pdf]

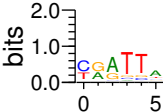

WebLogo 3.7.1

Supplement: SUPPLEMENTAL_Matl.zip [file ey_cisbp.pdf › pairlogos/ey_cisbp.pdf]

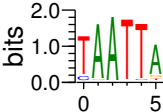

WebLogo 3.7.1

Supplement: SUPPLEMENTAL_Matl.zip [file ey_predicted.pdf › pairlogos/ey_predicted.pdf]

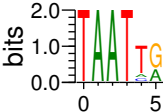

WebLogo 3.7.1

Supplement: SUPPLEMENTAL_Matl.zip [file ftz_cisbp.pdf › pairlogos/ftz_cisbp.pdf]

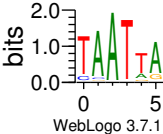

Supplement: SUPPLEMENTAL_Matl.zip [file ftz_predicted.pdf › pairlogos/ftz_predicted.pdf]
