# Supplementary figures and images for: Learning probabilistic protein–DNA recognition codes from DNA-binding specificities using structural mappings (part 9 of 25)
Source: HighWire-hosted journal article supplement (doi:10.1101/gr.276606.122), 2022-09-01

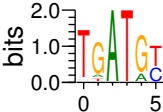

WebLogo 3.6.0

Supplement: SUPPLEMENTAL_Matl.zip [file TVAG_451170_PKKTVTNIR.pdf › SUPPLEMENTAL_Matl/rCLAMPS/STAMP/alignedLogos_NoyesGrps/logos_1/TVAG_451170_PKKTVTNIR.pdf]



WebLogo 3.6.0

Supplement: SUPPLEMENTAL_Matl.zip [file TVAG_451170_PKKTVTNIR_493.pdf › SUPPLEMENTAL_Matl/rCLAMPS/STAMP/alignedLogos_NoyesGrps/logos_1/TVAG_451170_PKKTVTNIR_493.pdf]

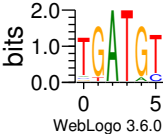

Supplement: SUPPLEMENTAL_Matl.zip [file TVAG_493070_LPRKTINVR_494.pdf › SUPPLEMENTAL_Matl/rCLAMPS/STAMP/alignedLogos_NoyesGrps/logos_1/TVAG_493070_LPRKTINVR_494.pdf]

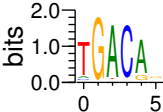

WebLogo 3.6.0

Supplement: SUPPLEMENTAL_Matl.zip [file Tgif1_RRRRNINRR_495.pdf › SUPPLEMENTAL_Matl/rCLAMPS/STAMP/alignedLogos_NoyesGrps/logos_1/Tgif1_RRRRNINRR_495.pdf]

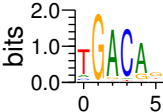

WebLogo 3.6.0

Supplement: SUPPLEMENTAL_Matl.zip [file Tgif2_RKRRNINRR_496.pdf › SUPPLEMENTAL_Matl/rCLAMPS/STAMP/alignedLogos_NoyesGrps/logos_1/Tgif2_RKRRNINRR_496.pdf]

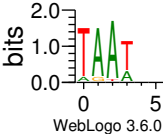

Supplement: SUPPLEMENTAL_Matl.zip [file Tlx2_KKPRTQNTK_497.pdf › SUPPLEMENTAL_Matl/rCLAMPS/STAMP/alignedLogos_NoyesGrps/logos_1/Tlx2_KKPRTQNTK_497.pdf]

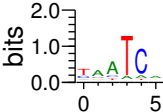

WebLogo 3.6.0

Supplement: SUPPLEMENTAL_Matl.zip [file UM00578_LKTGIQNNR_498.pdf › SUPPLEMENTAL_Matl/rCLAMPS/STAMP/alignedLogos_NoyesGrps/logos_1/UM00578_LKTGIQNNR_498.pdf]

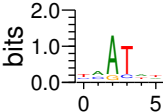

WebLogo 3.6.0

Supplement: SUPPLEMENTAL_Matl.zip [file UM04928_RKKRVQNAK.pdf › SUPPLEMENTAL_Matl/rCLAMPS/STAMP/alignedLogos_NoyesGrps/logos_1/UM04928_RKKRVQNAK.pdf]



WebLogo 3.6.0

Supplement: SUPPLEMENTAL_Matl.zip [file UM04928_RKKRVQNAK_499.pdf › SUPPLEMENTAL_Matl/rCLAMPS/STAMP/alignedLogos_NoyesGrps/logos_1/UM04928_RKKRVQNAK_499.pdf]

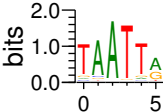

WebLogo 3.6.0

Supplement: SUPPLEMENTAL_Matl.zip [file UNCX_RRTRVQNAK.pdf › SUPPLEMENTAL_Matl/rCLAMPS/STAMP/alignedLogos_NoyesGrps/logos_1/UNCX_RRTRVQNAK.pdf]

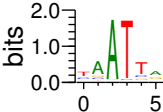

WebLogo 3.6.0

Supplement: SUPPLEMENTAL_Matl.zip [file UNCX_RRTRVQNAK_500.pdf › SUPPLEMENTAL_Matl/rCLAMPS/STAMP/alignedLogos_NoyesGrps/logos_1/UNCX_RRTRVQNAK_500.pdf]

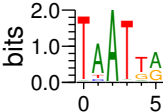

WebLogo 3.6.0

Supplement: SUPPLEMENTAL_Matl.zip [file Ubx_RRGRIQNMK.pdf › SUPPLEMENTAL_Matl/rCLAMPS/STAMP/alignedLogos_NoyesGrps/logos_1/Ubx_RRGRIQNMK.pdf]



WebLogo 3.6.0

Supplement: SUPPLEMENTAL_Matl.zip [file Ubx_RRGRIQNMK_501.pdf › SUPPLEMENTAL_Matl/rCLAMPS/STAMP/alignedLogos_NoyesGrps/logos_1/Ubx_RRGRIQNMK_501.pdf]

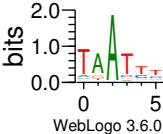

Supplement: SUPPLEMENTAL_Matl.zip [file Uncx_RRTRVQNAK_502.pdf › SUPPLEMENTAL_Matl/rCLAMPS/STAMP/alignedLogos_NoyesGrps/logos_1/Uncx_RRTRVQNAK_502.pdf]

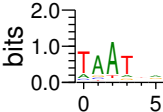

WebLogo 3.6.0

Supplement: SUPPLEMENTAL_Matl.zip [file VAX2_KRTRVQNTK.pdf › SUPPLEMENTAL_Matl/rCLAMPS/STAMP/alignedLogos_NoyesGrps/logos_1/VAX2_KRTRVQNTK.pdf]

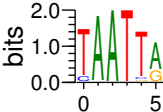

Supplement: SUPPLEMENTAL_Matl.zip [file VENTX_PRVRTQNMK.pdf › SUPPLEMENTAL_Matl/rCLAMPS/STAMP/alignedLogos_NoyesGrps/logos_1/VENTX_PRVRTQNMK.pdf]

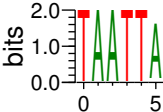

WebLogo 3.6.0

Supplement: SUPPLEMENTAL_Matl.zip [file VSX2_RRHRVQNAK.pdf › SUPPLEMENTAL_Matl/rCLAMPS/STAMP/alignedLogos_NoyesGrps/logos_1/VSX2_RRHRVQNAK.pdf]

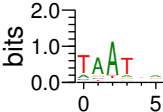

WebLogo 3.6.0

Supplement: SUPPLEMENTAL_Matl.zip [file Vax1_KRTRVQNTK.pdf › SUPPLEMENTAL_Matl/rCLAMPS/STAMP/alignedLogos_NoyesGrps/logos_1/Vax1_KRTRVQNTK.pdf]

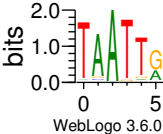

Supplement: SUPPLEMENTAL_Matl.zip [file Vsx1_RHGRVQNAK.pdf › SUPPLEMENTAL_Matl/rCLAMPS/STAMP/alignedLogos_NoyesGrps/logos_1/Vsx1_RHGRVQNAK.pdf]



Supplement: SUPPLEMENTAL_Matl.zip [file Vsx1_RHGRVQNAK_503.pdf › SUPPLEMENTAL_Matl/rCLAMPS/STAMP/alignedLogos_NoyesGrps/logos_1/Vsx1_RHGRVQNAK_503.pdf]

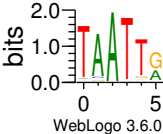

Supplement: SUPPLEMENTAL_Matl.zip [file Vsx2_RHSRVQNAK.pdf › SUPPLEMENTAL_Matl/rCLAMPS/STAMP/alignedLogos_NoyesGrps/logos_1/Vsx2_RHSRVQNAK.pdf]



Supplement: SUPPLEMENTAL_Matl.zip [file Vsx2_RHSRVQNAK_504.pdf › SUPPLEMENTAL_Matl/rCLAMPS/STAMP/alignedLogos_NoyesGrps/logos_1/Vsx2_RHSRVQNAK_504.pdf]

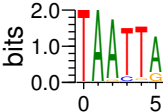

WebLogo 3.6.0

Supplement: SUPPLEMENTAL_Matl.zip [file WOX11_VRSRYQNSR_505.pdf › SUPPLEMENTAL_Matl/rCLAMPS/STAMP/alignedLogos_NoyesGrps/logos_1/WOX11_VRSRYQNSR_505.pdf]

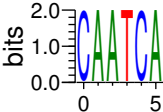

WebLogo 3.6.0

Supplement: SUPPLEMENTAL_Matl.zip [file WOX13_ARQRNQNAR.pdf › SUPPLEMENTAL_Matl/rCLAMPS/STAMP/alignedLogos_NoyesGrps/logos_1/WOX13_ARQRNQNAR.pdf]



WebLogo 3.6.0

Supplement: SUPPLEMENTAL_Matl.zip [file WOX13_ARQRNQNAR_506.pdf › SUPPLEMENTAL_Matl/rCLAMPS/STAMP/alignedLogos_NoyesGrps/logos_1/WOX13_ARQRNQNAR_506.pdf]

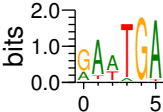

WebLogo 3.6.0

Supplement: SUPPLEMENTAL_Matl.zip [file WUS_TSTRYQNAR_507.pdf › SUPPLEMENTAL_Matl/rCLAMPS/STAMP/alignedLogos_NoyesGrps/logos_1/WUS_TSTRYQNAR_507.pdf]

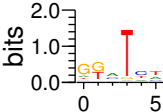

WebLogo 3.6.0

Supplement: SUPPLEMENTAL_Matl.zip [file XP_003689450.1_RKKRTKNAR.pdf › SUPPLEMENTAL_Matl/rCLAMPS/STAMP/alignedLogos_NoyesGrps/logos_1/XP_003689450.1_RKKRTKNAR.pdf]



WebLogo 3.6.0

Supplement: SUPPLEMENTAL_Matl.zip [file XP_003689450.1_RKKRTKNAR_508.pdf › SUPPLEMENTAL_Matl/rCLAMPS/STAMP/alignedLogos_NoyesGrps/logos_1/XP_003689450.1_RKKRTKNAR_508.pdf]

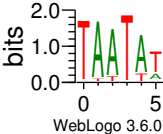

Supplement: SUPPLEMENTAL_Matl.zip [file Y749_MIMIV_QIKRIQNCK_509.pdf › SUPPLEMENTAL_Matl/rCLAMPS/STAMP/alignedLogos_NoyesGrps/logos_1/Y749_MIMIV_QIKRIQNCK_509.pdf]

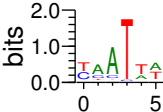

WebLogo 3.6.0

Supplement: SUPPLEMENTAL_Matl.zip [file YHP1_RRKRIQNQA.pdf › SUPPLEMENTAL_Matl/rCLAMPS/STAMP/alignedLogos_NoyesGrps/logos_1/YHP1_RRKRIQNQA.pdf]



Supplement: SUPPLEMENTAL_Matl.zip [file YHP1_RRKRIQNQA_510.pdf › SUPPLEMENTAL_Matl/rCLAMPS/STAMP/alignedLogos_NoyesGrps/logos_1/YHP1_RRKRIQNQA_510.pdf]

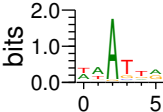

WebLogo 3.6.0

Supplement: SUPPLEMENTAL_Matl.zip [file YOX1_RRKRIQNQA.pdf › SUPPLEMENTAL_Matl/rCLAMPS/STAMP/alignedLogos_NoyesGrps/logos_1/YOX1_RRKRIQNQA.pdf]



WebLogo 3.6.0

Supplement: SUPPLEMENTAL_Matl.zip [file YOX1_RRKRIQNQA_511.pdf › SUPPLEMENTAL_Matl/rCLAMPS/STAMP/alignedLogos_NoyesGrps/logos_1/YOX1_RRKRIQNQA_511.pdf]

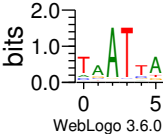

Supplement: SUPPLEMENTAL_Matl.zip [file ZFHX2_KRLRVQNAR.pdf › SUPPLEMENTAL_Matl/rCLAMPS/STAMP/alignedLogos_NoyesGrps/logos_1/ZFHX2_KRLRVQNAR.pdf]

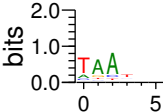

Supplement: SUPPLEMENTAL_Matl.zip [file ZHD7_KRFRVHNHL.pdf › SUPPLEMENTAL_Matl/rCLAMPS/STAMP/alignedLogos_NoyesGrps/logos_1/ZHD7_KRFRVHNHL.pdf]

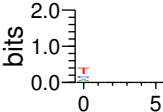

WebLogo 3.6.0

Supplement: SUPPLEMENTAL_Matl.zip [file ZHX1_TGKISGDYA_512.pdf › SUPPLEMENTAL_Matl/rCLAMPS/STAMP/alignedLogos_NoyesGrps/logos_1/ZHX1_TGKISGDYA_512.pdf]

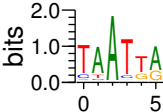

WebLogo 3.6.0

Supplement: SUPPLEMENTAL_Matl.zip [file abd-A_RRGRIQNMK.pdf › SUPPLEMENTAL_Matl/rCLAMPS/STAMP/alignedLogos_NoyesGrps/logos_1/abd-A_RRGRIQNMK.pdf]



WebLogo 3.6.0

Supplement: SUPPLEMENTAL_Matl.zip [file abd-A_RRGRIQNMK_513.pdf › SUPPLEMENTAL_Matl/rCLAMPS/STAMP/alignedLogos_NoyesGrps/logos_1/abd-A_RRGRIQNMK_513.pdf]

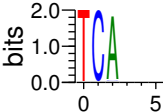

Supplement: SUPPLEMENTAL_Matl.zip [file achi_RKRRNINRR.pdf › SUPPLEMENTAL_Matl/rCLAMPS/STAMP/alignedLogos_NoyesGrps/logos_1/achi_RKRRNINRR.pdf]

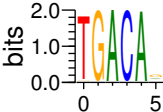

WebLogo 3.6.0

Supplement: SUPPLEMENTAL_Matl.zip [file achi_RKRRNINRR_514.pdf › SUPPLEMENTAL_Matl/rCLAMPS/STAMP/alignedLogos_NoyesGrps/logos_1/achi_RKRRNINRR_514.pdf]

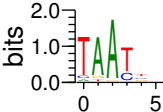

WebLogo 3.6.0

Supplement: SUPPLEMENTAL_Matl.zip [file al_RRYRVQNAK.pdf › SUPPLEMENTAL_Matl/rCLAMPS/STAMP/alignedLogos_NoyesGrps/logos_1/al_RRYRVQNAK.pdf]

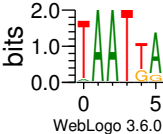

Supplement: SUPPLEMENTAL_Matl.zip [file ap_KRMRVQNAK.pdf › SUPPLEMENTAL_Matl/rCLAMPS/STAMP/alignedLogos_NoyesGrps/logos_1/ap_KRMRVQNAK.pdf]



Supplement: SUPPLEMENTAL_Matl.zip [file ap_KRMRVQNAK_515.pdf › SUPPLEMENTAL_Matl/rCLAMPS/STAMP/alignedLogos_NoyesGrps/logos_1/ap_KRMRVQNAK_515.pdf]

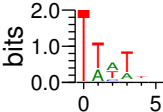

WebLogo 3.6.0

Supplement: SUPPLEMENTAL_Matl.zip [file ara_AARRTANRR.pdf › SUPPLEMENTAL_Matl/rCLAMPS/STAMP/alignedLogos_NoyesGrps/logos_1/ara_AARRTANRR.pdf]



WebLogo 3.6.0

Supplement: SUPPLEMENTAL_Matl.zip [file ara_AARRTANRR_516.pdf › SUPPLEMENTAL_Matl/rCLAMPS/STAMP/alignedLogos_NoyesGrps/logos_1/ara_AARRTANRR_516.pdf]

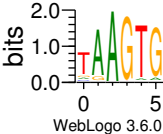

Supplement: SUPPLEMENTAL_Matl.zip [file bap_KRSRIQNYK.pdf › SUPPLEMENTAL_Matl/rCLAMPS/STAMP/alignedLogos_NoyesGrps/logos_1/bap_KRSRIQNYK.pdf]

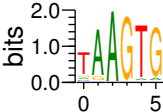

WebLogo 3.6.0

Supplement: SUPPLEMENTAL_Matl.zip [file bap_KRSRIQNYK_517.pdf › SUPPLEMENTAL_Matl/rCLAMPS/STAMP/alignedLogos_NoyesGrps/logos_1/bap_KRSRIQNYK_517.pdf]

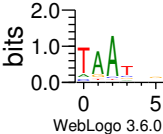

Supplement: SUPPLEMENTAL_Matl.zip [file barx1_RRSRTQNMK_518.pdf › SUPPLEMENTAL_Matl/rCLAMPS/STAMP/alignedLogos_NoyesGrps/logos_1/barx1_RRSRTQNMK_518.pdf]

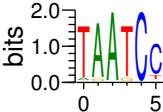

WebLogo 3.6.0

Supplement: SUPPLEMENTAL_Matl.zip [file bcd_RRTRIKNRR.pdf › SUPPLEMENTAL_Matl/rCLAMPS/STAMP/alignedLogos_NoyesGrps/logos_1/bcd_RRTRIKNRR.pdf]

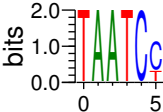

WebLogo 3.6.0

Supplement: SUPPLEMENTAL_Matl.zip [file bcd_RRTRIKNRR_519.pdf › SUPPLEMENTAL_Matl/rCLAMPS/STAMP/alignedLogos_NoyesGrps/logos_1/bcd_RRTRIKNRR_519.pdf]

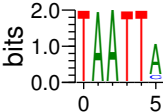

WebLogo 3.6.0

Supplement: SUPPLEMENTAL_Matl.zip [file bsh_RKARTQNMK.pdf › SUPPLEMENTAL_Matl/rCLAMPS/STAMP/alignedLogos_NoyesGrps/logos_1/bsh_RKARTQNMK.pdf]



WebLogo 3.6.0

Supplement: SUPPLEMENTAL_Matl.zip [file bsh_RKARTQNMK_520.pdf › SUPPLEMENTAL_Matl/rCLAMPS/STAMP/alignedLogos_NoyesGrps/logos_1/bsh_RKARTQNMK_520.pdf]

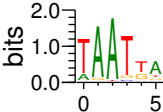

WebLogo 3.6.0

Supplement: SUPPLEMENTAL_Matl.zip [file btn_RKERVQNMK.pdf › SUPPLEMENTAL_Matl/rCLAMPS/STAMP/alignedLogos_NoyesGrps/logos_1/btn_RKERVQNMK.pdf]



WebLogo 3.6.0

Supplement: SUPPLEMENTAL_Matl.zip [file btn_RKERVQNMK_521.pdf › SUPPLEMENTAL_Matl/rCLAMPS/STAMP/alignedLogos_NoyesGrps/logos_1/btn_RKERVQNMK_521.pdf]

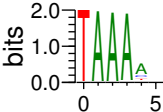

WebLogo 3.6.0

Supplement: SUPPLEMENTAL_Matl.zip [file cad_DKYRIQNAK.pdf › SUPPLEMENTAL_Matl/rCLAMPS/STAMP/alignedLogos_NoyesGrps/logos_1/cad_DKYRIQNAK.pdf]



WebLogo 3.6.0

Supplement: SUPPLEMENTAL_Matl.zip [file cad_DKYRIQNAK_522.pdf › SUPPLEMENTAL_Matl/rCLAMPS/STAMP/alignedLogos_NoyesGrps/logos_1/cad_DKYRIQNAK_522.pdf]

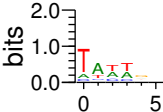

WebLogo 3.6.0

Supplement: SUPPLEMENTAL_Matl.zip [file caup_AARRTANRR.pdf › SUPPLEMENTAL_Matl/rCLAMPS/STAMP/alignedLogos_NoyesGrps/logos_1/caup_AARRTANRR.pdf]



WebLogo 3.6.0

Supplement: SUPPLEMENTAL_Matl.zip [file caup_AARRTANRR_523.pdf › SUPPLEMENTAL_Matl/rCLAMPS/STAMP/alignedLogos_NoyesGrps/logos_1/caup_AARRTANRR_523.pdf]

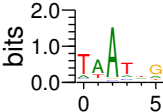

WebLogo 3.6.0

Supplement: SUPPLEMENTAL_Matl.zip [file ceh-19_RKPRTQNTK.pdf › SUPPLEMENTAL_Matl/rCLAMPS/STAMP/alignedLogos_NoyesGrps/logos_1/ceh-19_RKPRTQNTK.pdf]



WebLogo 3.6.0

Supplement: SUPPLEMENTAL_Matl.zip [file ceh-19_RKPRTQNTK_524.pdf › SUPPLEMENTAL_Matl/rCLAMPS/STAMP/alignedLogos_NoyesGrps/logos_1/ceh-19_RKPRTQNTK_524.pdf]

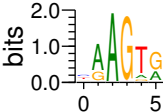

WebLogo 3.6.0

Supplement: SUPPLEMENTAL_Matl.zip [file ceh-22_RKRRIQNYK.pdf › SUPPLEMENTAL_Matl/rCLAMPS/STAMP/alignedLogos_NoyesGrps/logos_1/ceh-22_RKRRIQNYK.pdf]



WebLogo 3.6.0

Supplement: SUPPLEMENTAL_Matl.zip [file ceh-22_RKRRIQNYK_525.pdf › SUPPLEMENTAL_Matl/rCLAMPS/STAMP/alignedLogos_NoyesGrps/logos_1/ceh-22_RKRRIQNYK_525.pdf]

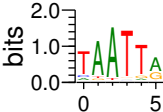

WebLogo 3.6.0

Supplement: SUPPLEMENTAL_Matl.zip [file ceh-23_RKARIQNSK.pdf › SUPPLEMENTAL_Matl/rCLAMPS/STAMP/alignedLogos_NoyesGrps/logos_1/ceh-23_RKARIQNSK.pdf]



WebLogo 3.6.0

Supplement: SUPPLEMENTAL_Matl.zip [file ceh-23_RKARIQNSK_526.pdf › SUPPLEMENTAL_Matl/rCLAMPS/STAMP/alignedLogos_NoyesGrps/logos_1/ceh-23_RKARIQNSK_526.pdf]

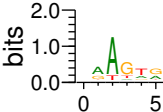

WebLogo 3.6.0

Supplement: SUPPLEMENTAL_Matl.zip [file ceh-24_RKRRIQNYK.pdf › SUPPLEMENTAL_Matl/rCLAMPS/STAMP/alignedLogos_NoyesGrps/logos_1/ceh-24_RKRRIQNYK.pdf]



WebLogo 3.6.0

Supplement: SUPPLEMENTAL_Matl.zip [file ceh-24_RKRRIQNYK_527.pdf › SUPPLEMENTAL_Matl/rCLAMPS/STAMP/alignedLogos_NoyesGrps/logos_1/ceh-24_RKRRIQNYK_527.pdf]

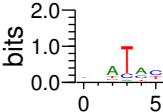

WebLogo 3.6.0

Supplement: SUPPLEMENTAL_Matl.zip [file ceh-34_EETNNKNQR_528.pdf › SUPPLEMENTAL_Matl/rCLAMPS/STAMP/alignedLogos_NoyesGrps/logos_1/ceh-34_EETNNKNQR_528.pdf]

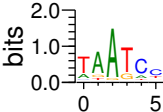

WebLogo 3.6.0

Supplement: SUPPLEMENTAL_Matl.zip [file ceh-36_RRERVKNAK.pdf › SUPPLEMENTAL_Matl/rCLAMPS/STAMP/alignedLogos_NoyesGrps/logos_1/ceh-36_RRERVKNAK.pdf]

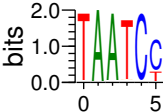

WebLogo 3.6.0

Supplement: SUPPLEMENTAL_Matl.zip [file ceh-37_RRERVKNAK.pdf › SUPPLEMENTAL_Matl/rCLAMPS/STAMP/alignedLogos_NoyesGrps/logos_1/ceh-37_RRERVKNAK.pdf]

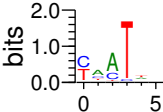

Supplement: SUPPLEMENTAL_Matl.zip [file ceh-51_RGARIQNFK.pdf › SUPPLEMENTAL_Matl/rCLAMPS/STAMP/alignedLogos_NoyesGrps/logos_1/ceh-51_RGARIQNFK.pdf]



Supplement: SUPPLEMENTAL_Matl.zip [file ceh-51_RGARIQNFK_530.pdf › SUPPLEMENTAL_Matl/rCLAMPS/STAMP/alignedLogos_NoyesGrps/logos_1/ceh-51_RGARIQNFK_530.pdf]

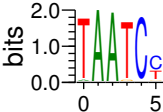

WebLogo 3.6.0

Supplement: SUPPLEMENTAL_Matl.zip [file ceh-53_RRLRVKNAK.pdf › SUPPLEMENTAL_Matl/rCLAMPS/STAMP/alignedLogos_NoyesGrps/logos_1/ceh-53_RRLRVKNAK.pdf]



Supplement: SUPPLEMENTAL_Matl.zip [file ceh-53_RRLRVKNAK_531.pdf › SUPPLEMENTAL_Matl/rCLAMPS/STAMP/alignedLogos_NoyesGrps/logos_1/ceh-53_RRLRVKNAK_531.pdf]

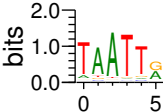

WebLogo 3.6.0

Supplement: SUPPLEMENTAL_Matl.zip [file ceh-54_KRNRIQNAK.pdf › SUPPLEMENTAL_Matl/rCLAMPS/STAMP/alignedLogos_NoyesGrps/logos_1/ceh-54_KRNRIQNAK.pdf]



WebLogo 3.6.0

Supplement: SUPPLEMENTAL_Matl.zip [file ceh-54_KRNRIQNAK_532.pdf › SUPPLEMENTAL_Matl/rCLAMPS/STAMP/alignedLogos_NoyesGrps/logos_1/ceh-54_KRNRIQNAK_532.pdf]

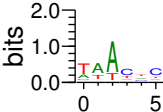

Supplement: SUPPLEMENTAL_Matl.zip [file ceh-57_RRPRNKNKK.pdf › SUPPLEMENTAL_Matl/rCLAMPS/STAMP/alignedLogos_NoyesGrps/logos_1/ceh-57_RRPRNKNKK.pdf]



Supplement: SUPPLEMENTAL_Matl.zip [file ceh-57_RRPRNKNKK_533.pdf › SUPPLEMENTAL_Matl/rCLAMPS/STAMP/alignedLogos_NoyesGrps/logos_1/ceh-57_RRPRNKNKK_533.pdf]

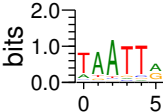

WebLogo 3.6.0

Supplement: SUPPLEMENTAL_Matl.zip [file ceh-58_RRGRVQNRK.pdf › SUPPLEMENTAL_Matl/rCLAMPS/STAMP/alignedLogos_NoyesGrps/logos_1/ceh-58_RRGRVQNRK.pdf]



WebLogo 3.6.0

Supplement: SUPPLEMENTAL_Matl.zip [file ceh-58_RRGRVQNRK_534.pdf › SUPPLEMENTAL_Matl/rCLAMPS/STAMP/alignedLogos_NoyesGrps/logos_1/ceh-58_RRGRVQNRK_534.pdf]

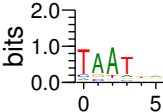

WebLogo 3.6.0

Supplement: SUPPLEMENTAL_Matl.zip [file ceh-5_KRPRVQNTK.pdf › SUPPLEMENTAL_Matl/rCLAMPS/STAMP/alignedLogos_NoyesGrps/logos_1/ceh-5_KRPRVQNTK.pdf]



WebLogo 3.6.0

Supplement: SUPPLEMENTAL_Matl.zip [file ceh-5_KRPRVQNTK_529.pdf › SUPPLEMENTAL_Matl/rCLAMPS/STAMP/alignedLogos_NoyesGrps/logos_1/ceh-5_KRPRVQNTK_529.pdf]

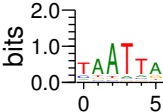

WebLogo 3.6.0

Supplement: SUPPLEMENTAL_Matl.zip [file ceh-62_RRKRTQNAK.pdf › SUPPLEMENTAL_Matl/rCLAMPS/STAMP/alignedLogos_NoyesGrps/logos_1/ceh-62_RRKRTQNAK.pdf]

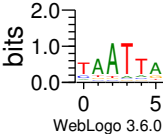

Supplement: SUPPLEMENTAL_Matl.zip [file ceh-62_RRKRTQNAK_535.pdf › SUPPLEMENTAL_Matl/rCLAMPS/STAMP/alignedLogos_NoyesGrps/logos_1/ceh-62_RRKRTQNAK_535.pdf]

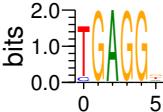

WebLogo 3.6.0

Supplement: SUPPLEMENTAL_Matl.zip [file ceh-74_AELDKDNTR_536.pdf › SUPPLEMENTAL_Matl/rCLAMPS/STAMP/alignedLogos_NoyesGrps/logos_1/ceh-74_AELDKDNTR_536.pdf]

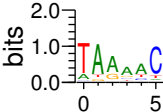

Supplement: SUPPLEMENTAL_Matl.zip [file ceh-90_KKTRRKAVK.pdf › SUPPLEMENTAL_Matl/rCLAMPS/STAMP/alignedLogos_NoyesGrps/logos_1/ceh-90_KKTRRKAVK.pdf]



Supplement: SUPPLEMENTAL_Matl.zip [file ceh-90_KKTRRKAVK_537.pdf › SUPPLEMENTAL_Matl/rCLAMPS/STAMP/alignedLogos_NoyesGrps/logos_1/ceh-90_KKTRRKAVK_537.pdf]

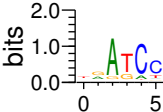

WebLogo 3.6.0

Supplement: SUPPLEMENTAL_Matl.zip [file dharma_GRIRVKNAR.pdf › SUPPLEMENTAL_Matl/rCLAMPS/STAMP/alignedLogos_NoyesGrps/logos_1/dharma_GRIRVKNAR.pdf]



WebLogo 3.6.0

Supplement: SUPPLEMENTAL_Matl.zip [file dharma_GRIRVKNAR_538.pdf › SUPPLEMENTAL_Matl/rCLAMPS/STAMP/alignedLogos_NoyesGrps/logos_1/dharma_GRIRVKNAR_538.pdf]

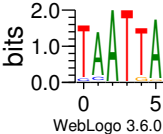

Supplement: SUPPLEMENTAL_Matl.zip [file dve_KRNRFKNAK.pdf › SUPPLEMENTAL_Matl/rCLAMPS/STAMP/alignedLogos_NoyesGrps/logos_1/dve_KRNRFKNAK.pdf]



Supplement: SUPPLEMENTAL_Matl.zip [file dve_RNRTFKNAK_539.pdf › SUPPLEMENTAL_Matl/rCLAMPS/STAMP/alignedLogos_NoyesGrps/logos_1/dve_RNRTFKNAK_539.pdf]

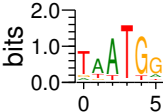

WebLogo 3.6.0

Supplement: SUPPLEMENTAL_Matl.zip [file egl-5_KKGRIQNMK_540.pdf › SUPPLEMENTAL_Matl/rCLAMPS/STAMP/alignedLogos_NoyesGrps/logos_1/egl-5_KKGRIQNMK_540.pdf]

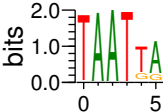

WebLogo 3.6.0

Supplement: SUPPLEMENTAL_Matl.zip [file ems_KRIRVQNTK.pdf › SUPPLEMENTAL_Matl/rCLAMPS/STAMP/alignedLogos_NoyesGrps/logos_1/ems_KRIRVQNTK.pdf]

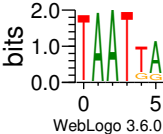

Supplement: SUPPLEMENTAL_Matl.zip [file ems_KRIRVQNTK_541.pdf › SUPPLEMENTAL_Matl/rCLAMPS/STAMP/alignedLogos_NoyesGrps/logos_1/ems_KRIRVQNTK_541.pdf]

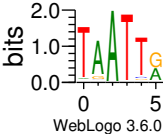

Supplement: SUPPLEMENTAL_Matl.zip [file en_KRPRIQNAK.pdf › SUPPLEMENTAL_Matl/rCLAMPS/STAMP/alignedLogos_NoyesGrps/logos_1/en_KRPRIQNAK.pdf]



Supplement: SUPPLEMENTAL_Matl.zip [file en_KRPRIQNAK_542.pdf › SUPPLEMENTAL_Matl/rCLAMPS/STAMP/alignedLogos_NoyesGrps/logos_1/en_KRPRIQNAK_542.pdf]

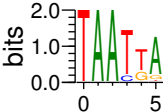

WebLogo 3.6.0

Supplement: SUPPLEMENTAL_Matl.zip [file eve_RRYRVQNMK.pdf › SUPPLEMENTAL_Matl/rCLAMPS/STAMP/alignedLogos_NoyesGrps/logos_1/eve_RRYRVQNMK.pdf]



WebLogo 3.6.0

Supplement: SUPPLEMENTAL_Matl.zip [file eve_RRYRVQNMK_543.pdf › SUPPLEMENTAL_Matl/rCLAMPS/STAMP/alignedLogos_NoyesGrps/logos_1/eve_RRYRVQNMK_543.pdf]

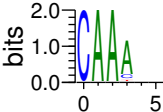

WebLogo 3.6.0

Supplement: SUPPLEMENTAL_Matl.zip [file exd_RRKRNGNIR.pdf › SUPPLEMENTAL_Matl/rCLAMPS/STAMP/alignedLogos_NoyesGrps/logos_1/exd_RRKRNGNIR.pdf]

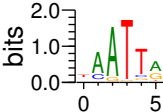

WebLogo 3.6.0

Supplement: SUPPLEMENTAL_Matl.zip [file exex_RRPRIQNMK.pdf › SUPPLEMENTAL_Matl/rCLAMPS/STAMP/alignedLogos_NoyesGrps/logos_1/exex_RRPRIQNMK.pdf]



WebLogo 3.6.0

Supplement: SUPPLEMENTAL_Matl.zip [file exex_RRPRIQNMK_544.pdf › SUPPLEMENTAL_Matl/rCLAMPS/STAMP/alignedLogos_NoyesGrps/logos_1/exex_RRPRIQNMK_544.pdf]
